# Supplementary material for: Combined transcriptome and proteome analysis of yak PASMCs under hypoxic and normoxic conditions
Source: PeerJ. 2022 Nov 25;10:e14369. doi: 10.7717/peerj.14369 (PMC9703989; doi:10.7717/peerj.14369)
Supplement: Supplemental Information 2 [file peerj-10-14369-s002.xlsx]

## Sheet: Sheet1
Fig3 Date
	ACTB		FGFR2	IL6	OSMR	PDGFB	FGFR3	NTF3	EREG	HMOX1	PLCG2	CSF1
Control1	14.01		28.34	22.3	21.79	30.77	30.9	27.82	20.93	21.49	26.04	17.69
Control2	14.04		28.2	22.27	21.86	31.19	30.49	27.91	20.83	21.54	25.93	17.7
Control3	14.02		28.52	22.26	21.84	30.94	31.17	27.68	20.8	21.53	25.96	17.74
Hypoxia4	13.97		26.81	19.64	20.55	28.74	30.44	27.02	23.77	22.59	26.96	19.15
Hypoxia5	13.86		26.72	19.42	20.5	28.88	29.69	27	23.65	22.57	27.01	19.15
Hypoxia6	13.8		26.86	19.46	20.55	28.62	30.56	26.94	23.65	22.59	26.93	19.09
			ITGA11	SPP1	PTGS2	THPO	FN1	LEP	TLR4	HIF-1α	HIF-2α
			24.2	16.02	18.19	29.6	14.92	29.43	22.81	17.07	20.31
			24.01	15.99	18.06	29.66	14.65	29.5	22.65	16.98	20.09
			24.02	16.01	18.04	29.56	14.64	29.68	22.66	17.03	20.08
			21.84	19.55	20.54	27.3	13.78	28.07	23.99	17.56	21.12
			21.73	19.53	20.42	27.55	13.65	28.15	23.83	17.56	20.92
			21.62	19.48	20.29	27.57	13.6	28.23	23.76	17.53	20.91
			EPO	VEGF
			30.11	32.21
			30.66	31.58
			31.16	32.14
			32.34	32.39
			31.48	31.71
			29.94	32.19
Fig4 Date
	ACTB		LDLR	HMOX1
Control1	18.8845		25.2515	26.7592
Control2	18.6671		24.9028	26.7402
Control3	18.789		25.0058	26.9514
Hypoxia4	21.1136		27.1128	28.7018
Hypoxia5	20.9885		27.0236	28.5391
Hypoxia6	20.9267		26.8714	28.5047
