# Supplementary material for: Combined transcriptome and proteome analysis of yak PASMCs under hypoxic and normoxic conditions
Source: PeerJ. 2022 Nov 25;10:e14369. doi: 10.7717/peerj.14369 (PMC9703989; doi:10.7717/peerj.14369)
Supplement: Supplemental Information 5 [file peerj-10-14369-s005.xlsx]

## Sheet: topblast
Sequence Name	Sequence Desc	Sequence Length	Top Hit Desc	Hit Acc	E-Value	Similarity	Bit-Score	Alignment	Positive
L8HX98	LGMN_BOVINLegumain OS=Bos taurus OX=9913 GN=LGMN PE=1 SV=1	433	sp|Q95M12|LGMN_BOVINLegumain OS=Bos taurus OX=9913 GN=LGMN PE=1 SV=1	Q95M12	0	99.77%	906.746	433	432
L8I7C0	NUA4L_BOVINNADH dehydrogenase	87	sp|Q3SZ44|NUA4L_BOVINNADH dehydrogenase [ubiquinone] 1 alpha subcomplex subunit 4-like 2 OS=Bos taurus OX=9913 GN=NDUFA4L2 PE=3 SV=1	Q3SZ44	4.3e-58	98.85%	177.563	87	86
L8I8M2	A1AG_BOVINAlpha-1-acid glyco OS=Bos taurus OX=9913 GN=ORM1 PE=2 SV=1	202	sp|Q3SZR3|A1AG_BOVINAlpha-1-acid glycoprotein OS=Bos taurus OX=9913 GN=ORM1 PE=2 SV=1	Q3SZR3	4.5e-147	98.02%	412.535	202	198
L8HZM0	MRP_BOVINMARCKS-related OS=Bos taurus OX=9913 GN=MARCKSL1 PE=2 SV=1	198	sp|Q0VBZ9|MRP_BOVINMARCKS-related protein OS=Bos taurus OX=9913 GN=MARCKSL1 PE=2 SV=1	Q0VBZ9	7.9e-131	100%	370.933	198	198
L8IM56	SPA38_BOVINSerpin A3-8 OS=Bos taurus OX=9913 GN=SERPINA3-8 PE=2 SV=1	345	sp|A6QPQ2|SPA38_BOVINSerpin A3-8 OS=Bos taurus OX=9913 GN=SERPINA3-8 PE=2 SV=1	A6QPQ2	0	92.46%	629.017	345	319
L8HTX7	APOA2_BOVINApolipo A-II OS=Bos taurus OX=9913 GN=APOA2 PE=1 SV=2	100	sp|P81644|APOA2_BOVINApolipoprotein A-II OS=Bos taurus OX=9913 GN=APOA2 PE=1 SV=2	P81644	3.4e-66	99%	199.134	100	99
L8IT90	FETA_BOVINAlpha-feto OS=Bos taurus OX=9913 GN=AFP PE=2 SV=1	610	sp|Q3SZ57|FETA_BOVINAlpha-fetoprotein OS=Bos taurus OX=9913 GN=AFP PE=2 SV=1	Q3SZ57	0	99.84%	1260.36	610	609
L8IH11	TXNIP_PIGThioredoxin-interacting OS=Sus scrofa OX=9823 GN=TXNIP PE=2 SV=1	391	sp|Q2HY40|TXNIP_PIGThioredoxin-interacting protein OS=Sus scrofa OX=9823 GN=TXNIP PE=2 SV=1	Q2HY40	0	97.7%	778.089	391	382
L8HN27	FETUB_BOVINFetuin-B OS=Bos taurus OX=9913 GN=FETUB PE=1 SV=1	387	sp|Q58D62|FETUB_BOVINFetuin-B OS=Bos taurus OX=9913 GN=FETUB PE=1 SV=1	Q58D62	0	99.74%	795.423	387	386
L8J2N7	A2AP_BOVINAlpha-2-antiplasmin OS=Bos taurus OX=9913 GN=SERPINF2 PE=1 SV=2	492	sp|P28800|A2AP_BOVINAlpha-2-antiplasmin OS=Bos taurus OX=9913 GN=SERPINF2 PE=1 SV=2	P28800	0	99.39%	986.482	492	489
L8IFL3	PTN_BOVINPleiotrophin OS=Bos taurus OX=9913 GN=PTN PE=1 SV=2	167	sp|P21782|PTN_BOVINPleiotrophin OS=Bos taurus OX=9913 GN=PTN PE=1 SV=2	P21782	2.1e-117	99.4%	334.339	168	167
L8ITU9	H14_HUMANHistone OS=Homo sapiens OX=9606 GN=H1-4 PE=1 SV=2	219	sp|P10412|H14_HUMANHistone H1.4 OS=Homo sapiens OX=9606 GN=H1-4 PE=1 SV=2	P10412	1.4e-124	99.54%	356.681	219	218
L8IIU6	A1AT_BOVINAlpha-1-anti ase OS=Bos taurus OX=9913 GN=SERPINA1 PE=1 SV=1	417	sp|P34955|A1AT_BOVINAlpha-1-antiproteinase OS=Bos taurus OX=9913 GN=SERPINA1 PE=1 SV=1	P34955	0	100%	852.047	416	416
L8I0I4	PPT1_BOVINPalmitoyl- thioesterase 1 OS=Bos taurus OX=9913 GN=PPT1 PE=1 SV=1	266	sp|P45478|PPT1_BOVINPalmitoyl-protein thioesterase 1 OS=Bos taurus OX=9913 GN=PPT1 PE=1 SV=1	P45478	0	100%	555.058	266	266
L8IIG2	FBLN1_HUMANFibulin-1 OS=Homo sapiens OX=9606 GN=FBLN1 PE=1 SV=4	702	sp|P23142|FBLN1_HUMANFibulin-1 OS=Homo sapiens OX=9606 GN=FBLN1 PE=1 SV=4	P23142	0	92.04%	1242.25	691	636
L8HN01	UFSP1_MOUSEUfm1-specific protease 1 OS=Mus musculus OX=10090 GN=Ufsp1 PE=1 SV=1	217	sp|Q9CZP0|UFSP1_MOUSEUfm1-specific protease 1 OS=Mus musculus OX=10090 GN=Ufsp1 PE=1 SV=1	Q9CZP0	2.2e-116	85.17%	335.88	209	178
L8ICN2	IMPCT_BOVIN IMPACT OS=Bos taurus OX=9913 GN=IMPACT PE=2 SV=2	307	sp|A7YY45|IMPCT_BOVINProtein IMPACT OS=Bos taurus OX=9913 GN=IMPACT PE=2 SV=2	A7YY45	0	100%	636.721	307	307
L8HV64	PFKAL_BOVINATP-dependent 6- liver type OS=Bos taurus OX=9913 GN=PFKL PE=2 SV=1	754	sp|A1A4J1|PFKAL_BOVINATP-dependent 6-phosphofructokinase, liver type OS=Bos taurus OX=9913 GN=PFKL PE=2 SV=1	A1A4J1	0	100%	1558.12	752	752
L8I798	FIBA_HUMANFibrinogen alpha chain OS=Homo sapiens OX=9606 GN=FGA PE=1 SV=2	776	sp|P02671|FIBA_HUMANFibrinogen alpha chain OS=Homo sapiens OX=9606 GN=FGA PE=1 SV=2	P02671	0	74.09%	1056.59	853	632
L8HZ66	PGK2_HORSEPhosphoglycerate kinase 2 OS=Equus caballus OX=9796 GN=PGK2 PE=3 SV=3	417	sp|Q8MIF7|PGK2_HORSEPhosphoglycerate kinase 2 OS=Equus caballus OX=9796 GN=PGK2 PE=3 SV=3	Q8MIF7	0	97.6%	803.897	417	407
L8J4V3	LMNB1_HUMANLamin-B1 OS=Homo sapiens OX=9606 GN=LMNB1 PE=1 SV=2	530	sp|P20700|LMNB1_HUMANLamin-B1 OS=Homo sapiens OX=9606 GN=LMNB1 PE=1 SV=2	P20700	0	98.68%	1046.19	530	523
L8HXM6	MIPT3_HUMANTRAF3-interacting 1 OS=Homo sapiens OX=9606 GN=TRAF3IP1 PE=1 SV=1	651	sp|Q8TDR0|MIPT3_HUMANTRAF3-interacting protein 1 OS=Homo sapiens OX=9606 GN=TRAF3IP1 PE=1 SV=1	Q8TDR0	0	85.52%	944.495	663	567
L8I2P8	PLBL2_BOVIN phospholipase B-like 2 OS=Bos taurus OX=9913 GN=PLBD2 PE=2 SV=1	588	sp|Q2KIY5|PLBL2_BOVINPutative phospholipase B-like 2 OS=Bos taurus OX=9913 GN=PLBD2 PE=2 SV=1	Q2KIY5	0	99.15%	1203.35	589	584
L8HK61	SPA33_BOVINSerpin A3-3 OS=Bos taurus OX=9913 GN=SERPINA3-3 PE=1 SV=2	357	sp|Q3ZEJ6|SPA33_BOVINSerpin A3-3 OS=Bos taurus OX=9913 GN=SERPINA3-3 PE=1 SV=2	Q3ZEJ6	0	98.84%	692.575	344	340
L8HW35	SPA37_BOVINSerpin A3-7 OS=Bos taurus OX=9913 GN=SERPINA3-7 PE=3 SV=1	423	sp|A2I7N3|SPA37_BOVINSerpin A3-7 OS=Bos taurus OX=9913 GN=SERPINA3-7 PE=3 SV=1	A2I7N3	0	93.35%	771.926	421	393
L8IE45	ANX11_BOVINAnnexin A11 OS=Bos taurus OX=9913 GN=ANXA11 PE=1 SV=1	520	sp|P27214|ANX11_BOVINAnnexin A11 OS=Bos taurus OX=9913 GN=ANXA11 PE=1 SV=1	P27214	0	89.48%	715.687	466	417
L8ICD7	THBG_BOVINThyroxine-binding globulin OS=Bos taurus OX=9913 GN=SERPINA7 PE=2 SV=1	411	sp|Q9TT36|THBG_BOVINThyroxine-binding globulin OS=Bos taurus OX=9913 GN=SERPINA7 PE=2 SV=1	Q9TT36	0	99.27%	840.106	411	408
L8I8E6	PGAM1_BOVINPhosphoglycerate mutase 1 OS=Bos taurus OX=9913 GN=PGAM1 PE=2 SV=3	254	sp|Q3SZ62|PGAM1_BOVINPhosphoglycerate mutase 1 OS=Bos taurus OX=9913 GN=PGAM1 PE=2 SV=3	Q3SZ62	0	100%	528.865	254	254
L8HYH0	XPA_HUMANDNA repair complementing XP-A cells OS=Homo sapiens OX=9606 GN=XPA PE=1 SV=1	273	sp|P23025|XPA_HUMANDNA repair protein complementing XP-A cells OS=Homo sapiens OX=9606 GN=XPA PE=1 SV=1	P23025	1.8e-161	93.04%	454.907	273	254
L8J0L8	MTND_BOVIN1,2-dihydroxy-3-keto-5-methylthiopentene dioxygenase OS=Bos taurus OX=9913 GN=ADI1 PE=2 SV=2	139	sp|Q3ZBL1|MTND_BOVIN1,2-dihydroxy-3-keto-5-methylthiopentene dioxygenase OS=Bos taurus OX=9913 GN=ADI1 PE=2 SV=2	Q3ZBL1	2.9e-98	99.28%	285.034	139	138
L8ICD6	LDHA_BOVINL-lactate dehydrogenase A chain OS=Bos taurus OX=9913 GN=LDHA PE=2 SV=2	361	sp|P19858|LDHA_BOVINL-lactate dehydrogenase A chain OS=Bos taurus OX=9913 GN=LDHA PE=2 SV=2	P19858	0	99.7%	679.863	332	331
L8IBZ3	PEX2_HUMANPeroxisome biogenesis factor 2 OS=Homo sapiens OX=9606 GN=PEX2 PE=1 SV=2	305	sp|P28328|PEX2_HUMANPeroxisome biogenesis factor 2 OS=Homo sapiens OX=9606 GN=PEX2 PE=1 SV=2	P28328	0	94.41%	563.533	304	287
L8IJG9	CAF1A_BOVINChromatin assembly factor 1 subunit A OS=Bos taurus OX=9913 GN=CHAF1A PE=2 SV=1	962	sp|A6QLA6|CAF1A_BOVINChromatin assembly factor 1 subunit A OS=Bos taurus OX=9913 GN=CHAF1A PE=2 SV=1	A6QLA6	0	99.27%	1934.07	965	958
L8IZX3	PGK1_BOVINPhosphoglycerate kinase 1 OS=Bos taurus OX=9913 GN=PGK1 PE=2 SV=3	417	sp|Q3T0P6|PGK1_BOVINPhosphoglycerate kinase 1 OS=Bos taurus OX=9913 GN=PGK1 PE=2 SV=3	Q3T0P6	0	100%	846.655	417	417
L8HX06	ANGT_SHEEPAngiotensinogen OS=Ovis aries OX=9940 GN=AGT PE=1 SV=2	471	sp|P20757|ANGT_SHEEPAngiotensinogen OS=Ovis aries OX=9940 GN=AGT PE=1 SV=2	P20757	0	93.28%	868.611	476	444
L8HXP8	TPIS_HUMANTriosephosphate isomerase OS=Homo sapiens OX=9606 GN=TPI1 PE=1 SV=3	286	sp|P60174|TPIS_HUMANTriosephosphate isomerase OS=Homo sapiens OX=9606 GN=TPI1 PE=1 SV=3	P60174	0	94.06%	539.265	286	269
L8J0P6	FUCO2_HUMANPlasma alpha-L-fucosidase OS=Homo sapiens OX=9606 GN=FUCA2 PE=1 SV=2	469	sp|Q9BTY2|FUCO2_HUMANPlasma alpha-L-fucosidase OS=Homo sapiens OX=9606 GN=FUCA2 PE=1 SV=2	Q9BTY2	0	92.27%	807.364	440	406
L8IX25	F12AI_BOVINFactor XIIa inhibitor OS=Bos taurus OX=9913 PE=1 SV=1	509	sp|P50448|F12AI_BOVINFactor XIIa inhibitor OS=Bos taurus OX=9913 PE=1 SV=1	P50448	0	97.06%	931.398	477	463
L8I9A3	PPT2_BOVINLysosomal thioesterase PPT2 OS=Bos taurus OX=9913 GN=PPT2 PE=2 SV=1	279	sp|Q1JQA0|PPT2_BOVINLysosomal thioesterase PPT2 OS=Bos taurus OX=9913 GN=PPT2 PE=2 SV=1	Q1JQA0	0	100%	583.948	279	279
L8HQI2	ADIPO_BOVINAdiponectin OS=Bos taurus OX=9913 GN=ADIPOQ PE=1 SV=1	240	sp|Q3Y5Z3|ADIPO_BOVINAdiponectin OS=Bos taurus OX=9913 GN=ADIPOQ PE=1 SV=1	Q3Y5Z3	1e-176	100%	490.73	240	240
L8IK42	ITIH4_BOVINInter-alpha-trypsin inhibitor heavy chain H4 OS=Bos taurus OX=9913 GN=ITIH4 PE=1 SV=1	927	sp|Q3T052|ITIH4_BOVINInter-alpha-trypsin inhibitor heavy chain H4 OS=Bos taurus OX=9913 GN=ITIH4 PE=1 SV=1	Q3T052	0	91.75%	1645.94	933	856
L8J052	VNN1_BOVINPantetheinase OS=Bos taurus OX=9913 GN=VNN1 PE=1 SV=1	514	sp|Q58CQ9|VNN1_BOVINPantetheinase OS=Bos taurus OX=9913 GN=VNN1 PE=1 SV=1	Q58CQ9	0	99.6%	1036.56	500	498
L8IQM1	CREG1_HUMAN CREG1 OS=Homo sapiens OX=9606 GN=CREG1 PE=1 SV=1	156	sp|O75629|CREG1_HUMANProtein CREG1 OS=Homo sapiens OX=9606 GN=CREG1 PE=1 SV=1	O75629	8.8e-101	92.95%	293.508	156	145
L8IDW8	ERO1A_BOVINERO1 alpha OS=Bos taurus OX=9913 GN=ERO1A PE=2 SV=1	435	sp|A5PJN2|ERO1A_BOVINERO1-like protein alpha OS=Bos taurus OX=9913 GN=ERO1A PE=2 SV=1	A5PJN2	0	97.24%	860.522	435	423
L8ILP2	CBG_BOVINCorticosteroid-binding globulin OS=Bos taurus OX=9913 GN=SERPINA6 PE=3 SV=1	404	sp|E1BF81|CBG_BOVINCorticosteroid-binding globulin OS=Bos taurus OX=9913 GN=SERPINA6 PE=3 SV=1	E1BF81	0	99.5%	833.558	404	402
L8HPA3	LOXL1_BOVINLysyl oxidase homolog 1 OS=Bos taurus OX=9913 GN=LOXL1 PE=1 SV=1	587	sp|Q95L39|LOXL1_BOVINLysyl oxidase homolog 1 OS=Bos taurus OX=9913 GN=LOXL1 PE=1 SV=1	Q95L39	0	62.72%	579.711	617	387
L8IHJ7	CFAI_PONABComplement factor I OS=Pongo abelii OX=9601 GN=CFI PE=2 SV=1	618	sp|Q5R5A4|CFAI_PONABComplement factor I OS=Pongo abelii OX=9601 GN=CFI PE=2 SV=1	Q5R5A4	0	75.36%	840.491	625	471
L8J332	ASPG_HUMANN(4)-(beta-N-acetylglucosaminyl)-L-asparaginase OS=Homo sapiens OX=9606 GN=AGA PE=1 SV=2	347	sp|P20933|ASPG_HUMANN(4)-(beta-N-acetylglucosaminyl)-L-asparaginase OS=Homo sapiens OX=9606 GN=AGA PE=1 SV=2	P20933	0	89.94%	546.199	328	295
L8IU68	ANT3_BOVINAntithrombin-III OS=Bos taurus OX=9913 GN=SERPINC1 PE=1 SV=2	465	sp|P41361|ANT3_BOVINAntithrombin-III OS=Bos taurus OX=9913 GN=SERPINC1 PE=1 SV=2	P41361	0	99.57%	959.518	465	463
L8J0L1	ANLN_HUMANAnillin OS=Homo sapiens OX=9606 GN=ANLN PE=1 SV=2	1124	sp|Q9NQW6|ANLN_HUMANAnillin OS=Homo sapiens OX=9606 GN=ANLN PE=1 SV=2	Q9NQW6	0	91.22%	1910.58	1128	1029
L8I793	SMAD2_MOUSEMothers against decapentaplegic homolog 2 OS=Mus musculus OX=10090 GN=Smad2 PE=1 SV=2	468	sp|Q62432|SMAD2_MOUSEMothers against decapentaplegic homolog 2 OS=Mus musculus OX=10090 GN=Smad2 PE=1 SV=2	Q62432	0	83.47%	756.518	502	419
L8J274	PDK1_HUMAN	413	sp|Q15118|PDK1_HUMAN[Pyruvate dehydrogenase (acetyl-transferring)] kinase isozyme 1, mitochondrial OS=Homo sapiens OX=9606 GN=PDK1 PE=1 SV=1	Q15118	0	95.16%	798.89	413	393
L8IUT8	FBN1_BOVINFibrillin-1 OS=Bos taurus OX=9913 GN=FBN1 PE=1 SV=2	2880	sp|P98133|FBN1_BOVINFibrillin-1 OS=Bos taurus OX=9913 GN=FBN1 PE=1 SV=2	P98133	0	99.27%	5729.06	2883	2862
L8IZ21	PEDF_BOVINPigment epithelium-derived factor OS=Bos taurus OX=9913 GN=SERPINF1 PE=1 SV=1	416	sp|Q95121|PEDF_BOVINPigment epithelium-derived factor OS=Bos taurus OX=9913 GN=SERPINF1 PE=1 SV=1	Q95121	0	99.52%	845.499	416	414
L8IS72	H12_BOVINHistone OS=Bos taurus OX=9913 GN=H1-2 PE=1 SV=2	213	sp|P02253|H12_BOVINHistone H1.2 OS=Bos taurus OX=9913 GN=H1-2 PE=1 SV=2	P02253	1.5e-124	100%	356.295	213	213
L8HNU2	E41L2_HUMANBand 2 OS=Homo sapiens OX=9606 GN=EPB41L2 PE=1 SV=1	595	sp|O43491|E41L2_HUMANBand 4.1-like protein 2 OS=Homo sapiens OX=9606 GN=EPB41L2 PE=1 SV=1	O43491	0	93.29%	989.564	596	556
L8HWY2	HXK2_PIGHexokinase-2 OS=Sus scrofa OX=9823 GN=HK2 PE=2 SV=1	917	sp|Q1W674|HXK2_PIGHexokinase-2 OS=Sus scrofa OX=9823 GN=HK2 PE=2 SV=1	Q1W674	0	99.02%	1851.25	917	908
L8HQR6	LG3BP_BOVINGalectin-3-binding OS=Bos taurus OX=9913 GN=LGALS3BP PE=1 SV=1	555	sp|A7E3W2|LG3BP_BOVINGalectin-3-binding protein OS=Bos taurus OX=9913 GN=LGALS3BP PE=1 SV=1	A7E3W2	0	99.28%	1137.87	555	551
L8HPT2	S10A2_BOVIN S100-A2 OS=Bos taurus OX=9913 GN=S100A2 PE=1 SV=1	145	sp|P10462|S10A2_BOVINProtein S100-A2 OS=Bos taurus OX=9913 GN=S100A2 PE=1 SV=1	P10462	8.2e-57	66.9%	176.792	145	97
L8IMB9	H2B3B_HUMANHistone H2B type 3-B OS=Homo sapiens OX=9606 GN=H2BU1 PE=1 SV=3	126	sp|Q8N257|H2B3B_HUMANHistone H2B type 3-B OS=Homo sapiens OX=9606 GN=H2BU1 PE=1 SV=3	Q8N257	2.6e-86	99.21%	252.292	126	125
L8I7A3	ARHGP_MOUSERho guanine nucleotide exchange factor 25 OS=Mus musculus OX=10090 GN=Arhgef25 PE=1 SV=1	619	sp|Q9CWR0|ARHGP_MOUSERho guanine nucleotide exchange factor 25 OS=Mus musculus OX=10090 GN=Arhgef25 PE=1 SV=1	Q9CWR0	0	91.11%	1001.12	619	564
L8HW49	FHL1_HUMANFour and a half LIM domains 1 OS=Homo sapiens OX=9606 GN=FHL1 PE=1 SV=4	323	sp|Q13642|FHL1_HUMANFour and a half LIM domains protein 1 OS=Homo sapiens OX=9606 GN=FHL1 PE=1 SV=4	Q13642	0	98.45%	646.351	323	318
L8IU59	CBPN_BOVINCarboxypeptidase N catalytic chain OS=Bos taurus OX=9913 GN=CPN1 PE=2 SV=1	462	sp|Q2KJ83|CBPN_BOVINCarboxypeptidase N catalytic chain OS=Bos taurus OX=9913 GN=CPN1 PE=2 SV=1	Q2KJ83	0	99.78%	965.296	462	461
L8J2E7	CIAO3_BOVINCytosolic iron-sulfur assembly component 3 OS=Bos taurus OX=9913 GN=CIAO3 PE=2 SV=2	476	sp|A4FV58|CIAO3_BOVINCytosolic iron-sulfur assembly component 3 OS=Bos taurus OX=9913 GN=CIAO3 PE=2 SV=2	A4FV58	0	99.79%	983.015	476	475
L8IQQ6	ANX10_HUMANAnnexin A10 OS=Homo sapiens OX=9606 GN=ANXA10 PE=1 SV=3	325	sp|Q9UJ72|ANX10_HUMANAnnexin A10 OS=Homo sapiens OX=9606 GN=ANXA10 PE=1 SV=3	Q9UJ72	0	94.65%	590.882	318	301
L8J197	ASAH1_BOVINAcid ceramidase OS=Bos taurus OX=9913 GN=ASAH1 PE=2 SV=3	422	sp|Q17QB3|ASAH1_BOVINAcid ceramidase OS=Bos taurus OX=9913 GN=ASAH1 PE=2 SV=3	Q17QB3	0	100%	815.068	395	395
L8I899	INCE_HUMANInner centromere OS=Homo sapiens OX=9606 GN=INCENP PE=1 SV=3	898	sp|Q9NQS7|INCE_HUMANInner centromere protein OS=Homo sapiens OX=9606 GN=INCENP PE=1 SV=3	Q9NQS7	0	84.82%	1135.55	922	782
L8J0U4	ALDOC_MACFAFructose-bisphosphate aldolase C OS=Macaca fascicularis OX=9541 GN=ALDOC PE=2 SV=3	395	sp|Q9GKW3|ALDOC_MACFAFructose-bisphosphate aldolase C OS=Macaca fascicularis OX=9541 GN=ALDOC PE=2 SV=3	Q9GKW3	0	99.45%	744.191	364	362
L8ICJ2	FKB10_BOVINPeptidyl-prolyl cis-trans isomerase FKBP10 OS=Bos taurus OX=9913 GN=FKBP10 PE=2 SV=1	567	sp|Q2HJ89|FKB10_BOVINPeptidyl-prolyl cis-trans isomerase FKBP10 OS=Bos taurus OX=9913 GN=FKBP10 PE=2 SV=1	Q2HJ89	0	98.77%	1137.87	567	560
L8INB2	FBLN4_MOUSEEGF-containing fibulin-like extracellular matrix 2 OS=Mus musculus OX=10090 GN=Efemp2 PE=1 SV=1	465	sp|Q9WVJ9|FBLN4_MOUSEEGF-containing fibulin-like extracellular matrix protein 2 OS=Mus musculus OX=10090 GN=Efemp2 PE=1 SV=1	Q9WVJ9	0	81.72%	722.62	465	380
L8IJS0	H10_BOVINHistone OS=Bos taurus OX=9913 GN=H1-0 PE=2 SV=3	194	sp|Q0IIJ2|H10_BOVINHistone H1.0 OS=Bos taurus OX=9913 GN=H1-0 PE=2 SV=3	Q0IIJ2	7.6e-125	100%	355.525	194	194
L8IWC2	FBLN3_MACFAEGF-containing fibulin-like extracellular matrix 1 OS=Macaca fascicularis OX=9541 GN=EFEMP1 PE=2 SV=1	511	sp|Q7YQD7|FBLN3_MACFAEGF-containing fibulin-like extracellular matrix protein 1 OS=Macaca fascicularis OX=9541 GN=EFEMP1 PE=2 SV=1	Q7YQD7	0	92.43%	951.429	515	476
L8HZL7	GPC4_HUMANGlypican-4 OS=Homo sapiens OX=9606 GN=GPC4 PE=1 SV=4	556	sp|O75487|GPC4_HUMANGlypican-4 OS=Homo sapiens OX=9606 GN=GPC4 PE=1 SV=4	O75487	0	96.04%	1044.65	556	534
L8IJX9	PAG15_BOVINPhospholipase A2 group XV OS=Bos taurus OX=9913 GN=PLA2G15 PE=1 SV=1	407	sp|Q8WMP9|PAG15_BOVINPhospholipase A2 group XV OS=Bos taurus OX=9913 GN=PLA2G15 PE=1 SV=1	Q8WMP9	0	100%	845.884	407	407
L8IXR3	ZBT38_HUMANZinc finger and BTB domain-containing 38 OS=Homo sapiens OX=9606 GN=ZBTB38 PE=1 SV=2	1204	sp|Q8NAP3|ZBT38_HUMANZinc finger and BTB domain-containing protein 38 OS=Homo sapiens OX=9606 GN=ZBTB38 PE=1 SV=2	Q8NAP3	0	93.36%	2213.73	1204	1124
L8HMZ8	IFI27_HUMANInterferon alpha-inducible mitochondrial OS=Homo sapiens OX=9606 GN=IFI27 PE=1 SV=4	55	sp|P40305|IFI27_HUMANInterferon alpha-inducible protein 27, mitochondrial OS=Homo sapiens OX=9606 GN=IFI27 PE=1 SV=4	P40305	2.3e-15	78.18%	67.3958	55	43
L8IGB4	RBMS1_HUMANRNA-binding single-stranded-interacting 1 OS=Homo sapiens OX=9606 GN=RBMS1 PE=1 SV=3	382	sp|P29558|RBMS1_HUMANRNA-binding motif, single-stranded-interacting protein 1 OS=Homo sapiens OX=9606 GN=RBMS1 PE=1 SV=3	P29558	0	99.21%	778.474	382	379
L8I6G2	IBP6_BOVINInsulin-like growth factor-binding 6 OS=Bos taurus OX=9913 GN=IGFBP6 PE=2 SV=2	236	sp|Q05718|IBP6_BOVINInsulin-like growth factor-binding protein 6 OS=Bos taurus OX=9913 GN=IGFBP6 PE=2 SV=2	Q05718	2.3e-132	95.85%	377.867	217	208
L8HXR1	CAV3_BOVINCaveolin-3 OS=Bos taurus OX=9913 GN=CAV3 PE=2 SV=1	151	sp|Q2KI43|CAV3_BOVINCaveolin-3 OS=Bos taurus OX=9913 GN=CAV3 PE=2 SV=1	Q2KI43	2.4e-109	100%	312.768	151	151
L8HW13	CAVN3_BOVINCaveolae-associated 3 OS=Bos taurus OX=9913 GN=CAVIN3 PE=2 SV=1	142	sp|A4FV37|CAVN3_BOVINCaveolae-associated protein 3 OS=Bos taurus OX=9913 GN=CAVIN3 PE=2 SV=1	A4FV37	1e-71	96.48%	220.32	142	137
L8IHV8	ITIH1_BOVINInter-alpha-trypsin inhibitor heavy chain H1 OS=Bos taurus OX=9913 GN=ITIH1 PE=1 SV=1	908	sp|Q0VCM5|ITIH1_BOVINInter-alpha-trypsin inhibitor heavy chain H1 OS=Bos taurus OX=9913 GN=ITIH1 PE=1 SV=1	Q0VCM5	0	99.89%	1870.9	906	905
L8HXK3	MYH10_BOVINMyosin-10 OS=Bos taurus OX=9913 GN=MYH10 PE=2 SV=2	1994	sp|Q27991|MYH10_BOVINMyosin-10 OS=Bos taurus OX=9913 GN=MYH10 PE=2 SV=2	Q27991	0	98.55%	3947.13	1998	1969
L8I5C0	CATD_BOVINCathepsin D OS=Bos taurus OX=9913 GN=CTSD PE=1 SV=2	394	sp|P80209|CATD_BOVINCathepsin D OS=Bos taurus OX=9913 GN=CTSD PE=1 SV=2	P80209	0	98.71%	789.26	388	383
L8I966	GLYM_BOVINSerine mitochondrial OS=Bos taurus OX=9913 GN=SHMT2 PE=2 SV=1	504	sp|Q3SZ20|GLYM_BOVINSerine hydroxymethyltransferase, mitochondrial OS=Bos taurus OX=9913 GN=SHMT2 PE=2 SV=1	Q3SZ20	0	100%	1045.42	504	504
L8IKX5	LICH_MACFALysosomal acid lipase cholesteryl ester hydrolase OS=Macaca fascicularis OX=9541 GN=LIPA PE=2 SV=1	404	sp|Q4R4S5|LICH_MACFALysosomal acid lipase/cholesteryl ester hydrolase OS=Macaca fascicularis OX=9541 GN=LIPA PE=2 SV=1	Q4R4S5	0	89.92%	687.952	397	357
L8IXW8	GPX4_BOVINPhospholipid hydroperoxide glutathione peroxidase OS=Bos taurus OX=9913 GN=GPX4 PE=2 SV=2	166	sp|Q9N2J2|GPX4_BOVINPhospholipid hydroperoxide glutathione peroxidase OS=Bos taurus OX=9913 GN=GPX4 PE=2 SV=2	Q9N2J2	3.8e-80	68.21%	240.736	195	133
L8HT60	HBB_BOSMUHemoglobin subunit beta OS=Bos mutus grunniens OX=30521 GN=HBB PE=1 SV=1	162	sp|P02072|HBB_BOSMUHemoglobin subunit beta OS=Bos mutus grunniens OX=30521 GN=HBB PE=1 SV=1	P02072	7.6e-102	99.31%	293.893	145	144
L8HW02	TPP1_BOVINTripeptidyl-peptidase 1 OS=Bos taurus OX=9913 GN=TPP1 PE=2 SV=1	572	sp|Q0V8B6|TPP1_BOVINTripeptidyl-peptidase 1 OS=Bos taurus OX=9913 GN=TPP1 PE=2 SV=1	Q0V8B6	0	100%	1151.35	563	563
L8IE51	SKA2_BOVINSpindle and kinetochore-associated 2 OS=Bos taurus OX=9913 GN=SKA2 PE=2 SV=1	140	sp|Q2TBY0|SKA2_BOVINSpindle and kinetochore-associated protein 2 OS=Bos taurus OX=9913 GN=SKA2 PE=2 SV=1	Q2TBY0	6.1e-76	97.52%	226.098	121	118
L8HZ02	FUCO_BOVINTissue alpha-L-fucosidase OS=Bos taurus OX=9913 GN=FUCA1 PE=2 SV=1	473	sp|Q2KIM0|FUCO_BOVINTissue alpha-L-fucosidase OS=Bos taurus OX=9913 GN=FUCA1 PE=2 SV=1	Q2KIM0	0	99.79%	963.37	468	467
L8IPN7	GPX7_BOVINGlutathione peroxidase 7 OS=Bos taurus OX=9913 GN=GPX7 PE=2 SV=1	145	sp|A6QLY2|GPX7_BOVINGlutathione peroxidase 7 OS=Bos taurus OX=9913 GN=GPX7 PE=2 SV=1	A6QLY2	5.3e-104	97.93%	300.056	145	142
L8IBA7	HEXB_HUMANBeta-hexosaminidase subunit beta OS=Homo sapiens OX=9606 GN=HEXB PE=1 SV=3	523	sp|P07686|HEXB_HUMANBeta-hexosaminidase subunit beta OS=Homo sapiens OX=9606 GN=HEXB PE=1 SV=3	P07686	0	83.65%	815.453	520	435
L8IIF1	UPAR_BOVINUrokinase plasminogen activator surface receptor OS=Bos taurus OX=9913 GN=PLAUR PE=2 SV=1	330	sp|Q05588|UPAR_BOVINUrokinase plasminogen activator surface receptor OS=Bos taurus OX=9913 GN=PLAUR PE=2 SV=1	Q05588	0	99.09%	668.692	330	327
L8J067	CPNE8_HUMANCopine-8 OS=Homo sapiens OX=9606 GN=CPNE8 PE=1 SV=2	564	sp|Q86YQ8|CPNE8_HUMANCopine-8 OS=Homo sapiens OX=9606 GN=CPNE8 PE=1 SV=2	Q86YQ8	0	99.47%	1154.04	564	561
L8I3R4	ASPH_BOVINAspartyl asparaginyl beta-hydroxylase OS=Bos taurus OX=9913 GN=ASPH PE=1 SV=1	755	sp|Q28056|ASPH_BOVINAspartyl/asparaginyl beta-hydroxylase OS=Bos taurus OX=9913 GN=ASPH PE=1 SV=1	Q28056	0	99.21%	1543.1	756	750
L8II96	ZPI_HUMAN Z-dependent protease inhibitor OS=Homo sapiens OX=9606 GN=SERPINA10 PE=1 SV=1	452	sp|Q9UK55|ZPI_HUMANProtein Z-dependent protease inhibitor OS=Homo sapiens OX=9606 GN=SERPINA10 PE=1 SV=1	Q9UK55	0	79.78%	599.356	450	359
L8ISB9	CPZIP_BOVIN -interacting OS=Bos taurus OX=9913 GN=RCSD1 PE=2 SV=1	380	sp|Q3ZBT0|CPZIP_BOVINCapZ-interacting protein OS=Bos taurus OX=9913 GN=RCSD1 PE=2 SV=1	Q3ZBT0	0	99.47%	731.095	380	378
L8HRM3	VAT1_RATSynaptic vesicle membrane VAT-1 homolog OS=Rattus norvegicus OX=10116 GN=Vat1 PE=1 SV=1	285	sp|Q3MIE4|VAT1_RATSynaptic vesicle membrane protein VAT-1 homolog OS=Rattus norvegicus OX=10116 GN=Vat1 PE=1 SV=1	Q3MIE4	0	97.89%	565.459	285	279
L8II04	F118A_MOUSE FAM118A OS=Mus musculus OX=10090 GN=Fam118a PE=1 SV=1	357	sp|Q91YN1|F118A_MOUSEProtein FAM118A OS=Mus musculus OX=10090 GN=Fam118a PE=1 SV=1	Q91YN1	0	97.76%	701.049	357	349
L8HRD1	LRC8A_HUMANVolume-regulated anion channel subunit LRRC8A OS=Homo sapiens OX=9606 GN=LRRC8A PE=1 SV=1	810	sp|Q8IWT6|LRC8A_HUMANVolume-regulated anion channel subunit LRRC8A OS=Homo sapiens OX=9606 GN=LRRC8A PE=1 SV=1	Q8IWT6	0	99.63%	1651.34	810	807
L8HWB6	RAB7A_BOVINRas-related Rab-7a OS=Bos taurus OX=9913 GN=RAB7A PE=2 SV=1	207	sp|Q3T0F5|RAB7A_BOVINRas-related protein Rab-7a OS=Bos taurus OX=9913 GN=RAB7A PE=2 SV=1	Q3T0F5	7.2e-154	99.52%	430.254	207	206
L8IJ35	GTR10_HUMANSolute carrier family facilitated glucose transporter member 10 OS=Homo sapiens OX=9606 GN=SLC2A10 PE=1 SV=2	537	sp|O95528|GTR10_HUMANSolute carrier family 2, facilitated glucose transporter member 10 OS=Homo sapiens OX=9606 GN=SLC2A10 PE=1 SV=2	O95528	0	88.6%	816.224	535	474
L8HXL7	RNF13_BOVINE3 ubiquitin- ligase RNF13 OS=Bos taurus OX=9913 GN=RNF13 PE=2 SV=1	380	sp|Q0VD51|RNF13_BOVINE3 ubiquitin-protein ligase RNF13 OS=Bos taurus OX=9913 GN=RNF13 PE=2 SV=1	Q0VD51	0	100%	785.793	380	380
L8II73	STAR3_MOUSE -related lipid transfer 3 OS=Mus musculus OX=10090 GN=Stard3 PE=1 SV=1	448	sp|Q61542|STAR3_MOUSEStAR-related lipid transfer protein 3 OS=Mus musculus OX=10090 GN=Stard3 PE=1 SV=1	Q61542	0	97.32%	810.061	448	436
L8I3S5	KEAP1_PIGKelch-like ECH-associated 1 OS=Sus scrofa OX=9823 GN=KEAP1 PE=3 SV=1	635	sp|Q684M4|KEAP1_PIGKelch-like ECH-associated protein 1 OS=Sus scrofa OX=9823 GN=KEAP1 PE=3 SV=1	Q684M4	0	99.2%	1300.03	624	619
L8J5Y3	CI072_HUMANGuanine nucleotide exchange C9orf72 OS=Homo sapiens OX=9606 GN=C9orf72 PE=1 SV=2	481	sp|Q96LT7|CI072_HUMANGuanine nucleotide exchange C9orf72 OS=Homo sapiens OX=9606 GN=C9orf72 PE=1 SV=2	Q96LT7	0	99.38%	988.023	481	478
L8I2E4	4F2_HUMAN4F2 cell-surface antigen heavy chain OS=Homo sapiens OX=9606 GN=SLC3A2 PE=1 SV=3	572	sp|P08195|4F2_HUMAN4F2 cell-surface antigen heavy chain OS=Homo sapiens OX=9606 GN=SLC3A2 PE=1 SV=3	P08195	0	86.94%	806.979	536	466
L8HWS9	PAFA_BOVINPlatelet-activating factor acetylhydrolase OS=Bos taurus OX=9913 GN=PLA2G7 PE=2 SV=1	444	sp|Q28017|PAFA_BOVINPlatelet-activating factor acetylhydrolase OS=Bos taurus OX=9913 GN=PLA2G7 PE=2 SV=1	Q28017	0	99.55%	921.383	444	442
L8I7Z4	TIM8A_RATMitochondrial import inner membrane translocase subunit Tim8 A OS=Rattus norvegicus OX=10116 GN=Timm8a PE=1 SV=1	81	sp|Q9WVA1|TIM8A_RATMitochondrial import inner membrane translocase subunit Tim8 A OS=Rattus norvegicus OX=10116 GN=Timm8a PE=1 SV=1	Q9WVA1	2.1e-55	100%	170.629	81	81
L8I1W1	ATF6A_HUMANCyclic AMP-dependent transcription factor ATF-6 alpha OS=Homo sapiens OX=9606 GN=ATF6 PE=1 SV=3	666	sp|P18850|ATF6A_HUMANCyclic AMP-dependent transcription factor ATF-6 alpha OS=Homo sapiens OX=9606 GN=ATF6 PE=1 SV=3	P18850	0	96.11%	1224.54	669	643
L8J1K1	ATP7A_HUMANCopper-transporting ATPase 1 OS=Homo sapiens OX=9606 GN=ATP7A PE=1 SV=4	1510	sp|Q04656|ATP7A_HUMANCopper-transporting ATPase 1 OS=Homo sapiens OX=9606 GN=ATP7A PE=1 SV=4	Q04656	0	95.83%	2801.93	1510	1447
L8HSA3	S39A1_BOVINZinc transporter ZIP1 OS=Bos taurus OX=9913 GN=SLC39A1 PE=2 SV=1	326	sp|Q3SYU3|S39A1_BOVINZinc transporter ZIP1 OS=Bos taurus OX=9913 GN=SLC39A1 PE=2 SV=1	Q3SYU3	0	100%	629.787	324	324
L8I944	MTEF3_HUMANTranscription termination factor mitochondrial OS=Homo sapiens OX=9606 GN=MTERF3 PE=1 SV=2	417	sp|Q96E29|MTEF3_HUMANTranscription termination factor 3, mitochondrial OS=Homo sapiens OX=9606 GN=MTERF3 PE=1 SV=2	Q96E29	0	90.65%	676.396	417	378
L8I6J8	SL7A1_HUMANHigh affinity cationic amino acid transporter 1 OS=Homo sapiens OX=9606 GN=SLC7A1 PE=1 SV=1	629	sp|P30825|SL7A1_HUMANHigh affinity cationic amino acid transporter 1 OS=Homo sapiens OX=9606 GN=SLC7A1 PE=1 SV=1	P30825	0	94.91%	1154.43	629	597
L8IEB1	LACB2_BOVINEndoribonuclease LACTB2 OS=Bos taurus OX=9913 GN=LACTB2 PE=2 SV=1	288	sp|Q1LZ83|LACB2_BOVINEndoribonuclease LACTB2 OS=Bos taurus OX=9913 GN=LACTB2 PE=2 SV=1	Q1LZ83	0	100%	596.66	288	288
L8IUU5	BDH2_BOVIN3-hydroxybutyrate dehydrogenase type 2 OS=Bos taurus OX=9913 GN=BDH2 PE=2 SV=1	250	sp|Q3T046|BDH2_BOVIN3-hydroxybutyrate dehydrogenase type 2 OS=Bos taurus OX=9913 GN=BDH2 PE=2 SV=1	Q3T046	0	100%	503.442	245	245
L8I612	FA5_BOVINCoagulation factor V OS=Bos taurus OX=9913 GN=F5 PE=1 SV=1	2182	sp|Q28107|FA5_BOVINCoagulation factor V OS=Bos taurus OX=9913 GN=F5 PE=1 SV=1	Q28107	0	97.65%	4444.03	2214	2162
L8IHP9	CADM1_RATCell adhesion molecule 1 OS=Rattus norvegicus OX=10116 GN=Cadm1 PE=1 SV=1	429	sp|Q6AYP5|CADM1_RATCell adhesion molecule 1 OS=Rattus norvegicus OX=10116 GN=Cadm1 PE=1 SV=1	Q6AYP5	0	98.15%	876.7	432	424
L8I9I2	CRYAB_BOVINAlpha-crystallin B chain OS=Bos taurus OX=9913 GN=CRYAB PE=1 SV=2	175	sp|P02510|CRYAB_BOVINAlpha-crystallin B chain OS=Bos taurus OX=9913 GN=CRYAB PE=1 SV=2	P02510	1.6e-124	100%	353.214	175	175
L8HW79	PRIO_BOSGAMajor prion OS=Bos gaurus OX=9904 GN=PRNP PE=3 SV=1	264	sp|Q5UJH0|PRIO_BOSGAMajor prion protein OS=Bos gaurus OX=9904 GN=PRNP PE=3 SV=1	Q5UJH0	0	100%	535.798	264	264
L8HPM7	FAM3A_PONAB FAM3A OS=Pongo abelii OX=9601 GN=FAM3A PE=2 SV=1	242	sp|Q5R5C3|FAM3A_PONABProtein FAM3A OS=Pongo abelii OX=9601 GN=FAM3A PE=2 SV=1	Q5R5C3	1.3e-145	89.92%	411.764	238	214
L8IPF6	CCL26_CANLFC-C motif chemokine 26 OS=Canis lupus familiaris OX=9615 GN=CCL26 PE=3 SV=1	94	sp|Q64H35|CCL26_CANLFC-C motif chemokine 26 OS=Canis lupus familiaris OX=9615 GN=CCL26 PE=3 SV=1	Q64H35	3.1e-43	82.8%	140.198	93	77
L8HND5	MDR1_HUMANATP-dependent translocase ABCB1 OS=Homo sapiens OX=9606 GN=ABCB1 PE=1 SV=3	944	sp|P08183|MDR1_HUMANATP-dependent translocase ABCB1 OS=Homo sapiens OX=9606 GN=ABCB1 PE=1 SV=3	P08183	0	92.69%	1659.81	944	875
L8I2V5	SIA8D_BOVINCMP-N-acetylneuraminate-poly-alpha-2,8-sialyltransferase OS=Bos taurus OX=9913 GN=ST8SIA4 PE=2 SV=1	359	sp|Q6ZXC9|SIA8D_BOVINCMP-N-acetylneuraminate-poly-alpha-2,8-sialyltransferase OS=Bos taurus OX=9913 GN=ST8SIA4 PE=2 SV=1	Q6ZXC9	0	99.44%	737.643	359	357
L8IBF6	LHPL2_HUMANLHFPL tetraspan subfamily member 2 OS=Homo sapiens OX=9606 GN=LHFPL2 PE=1 SV=2	228	sp|Q6ZUX7|LHPL2_HUMANLHFPL tetraspan subfamily member 2 protein OS=Homo sapiens OX=9606 GN=LHFPL2 PE=1 SV=2	Q6ZUX7	8.8e-147	95.18%	414.075	228	217
L8HUW1	CHIC2_HUMANCysteine-rich hydrophobic domain-containing 2 OS=Homo sapiens OX=9606 GN=CHIC2 PE=1 SV=1	150	sp|Q9UKJ5|CHIC2_HUMANCysteine-rich hydrophobic domain-containing protein 2 OS=Homo sapiens OX=9606 GN=CHIC2 PE=1 SV=1	Q9UKJ5	3.5e-107	100%	307.76	150	150
L8I018	ARF2_RATADP-ribosylation factor 2 OS=Rattus norvegicus OX=10116 GN=Arf2 PE=2 SV=1	181	sp|P84082|ARF2_RATADP-ribosylation factor 2 OS=Rattus norvegicus OX=10116 GN=Arf2 PE=2 SV=1	P84082	1.3e-132	100%	374.015	181	181
L8IAB5	ATG4C_HUMANCysteine protease ATG4C OS=Homo sapiens OX=9606 GN=ATG4C PE=1 SV=1	458	sp|Q96DT6|ATG4C_HUMANCysteine protease ATG4C OS=Homo sapiens OX=9606 GN=ATG4C PE=1 SV=1	Q96DT6	0	97.38%	909.827	458	446
L8IT79	ARMC1_BOVINArmadillo repeat-containing 1 OS=Bos taurus OX=9913 GN=ARMC1 PE=2 SV=1	282	sp|Q3ZBE1|ARMC1_BOVINArmadillo repeat-containing protein 1 OS=Bos taurus OX=9913 GN=ARMC1 PE=2 SV=1	Q3ZBE1	0	100%	586.645	282	282
L8IEH4	TOM1_HUMANTarget of Myb 1 OS=Homo sapiens OX=9606 GN=TOM1 PE=1 SV=2	488	sp|O60784|TOM1_HUMANTarget of Myb protein 1 OS=Homo sapiens OX=9606 GN=TOM1 PE=1 SV=2	O60784	0	91.39%	863.603	488	446
L8J1X3	NSDHL_BOVINSterol-4-alpha-carboxylate 3- decarboxylating OS=Bos taurus OX=9913 GN=NSDHL PE=2 SV=1	338	sp|Q3ZBE9|NSDHL_BOVINSterol-4-alpha-carboxylate 3-dehydrogenase, decarboxylating OS=Bos taurus OX=9913 GN=NSDHL PE=2 SV=1	Q3ZBE9	0	99.41%	697.967	338	336
L8IT07	TIM10_BOVINMitochondrial import inner membrane translocase subunit Tim10 OS=Bos taurus OX=9913 GN=TIMM10 PE=3 SV=1	90	sp|Q2NKR1|TIM10_BOVINMitochondrial import inner membrane translocase subunit Tim10 OS=Bos taurus OX=9913 GN=TIMM10 PE=3 SV=1	Q2NKR1	2.8e-61	100%	185.652	90	90
L8J1S2	PKHB2_MOUSEPleckstrin homology domain-containing family B member 2 OS=Mus musculus OX=10090 GN=Plekhb2 PE=1 SV=1	222	sp|Q9QZC7|PKHB2_MOUSEPleckstrin homology domain-containing family B member 2 OS=Mus musculus OX=10090 GN=Plekhb2 PE=1 SV=1	Q9QZC7	5e-149	94.59%	419.083	222	210
L8IMS7	TOLIP_BOVINToll-interacting OS=Bos taurus OX=9913 GN=TOLLIP PE=2 SV=1	262	sp|Q2LGB5|TOLIP_BOVINToll-interacting protein OS=Bos taurus OX=9913 GN=TOLLIP PE=2 SV=1	Q2LGB5	0	100%	539.65	262	262
L8I491	S38A1_HUMANSodium-coupled neutral amino acid transporter 1 OS=Homo sapiens OX=9606 GN=SLC38A1 PE=1 SV=1	486	sp|Q9H2H9|S38A1_HUMANSodium-coupled neutral amino acid transporter 1 OS=Homo sapiens OX=9606 GN=SLC38A1 PE=1 SV=1	Q9H2H9	0	97.33%	911.753	487	474
L8HMB1	PGS1_BOVINBiglycan OS=Bos taurus OX=9913 GN=BGN PE=1 SV=3	369	sp|P21809|PGS1_BOVINBiglycan OS=Bos taurus OX=9913 GN=BGN PE=1 SV=3	P21809	0	100%	756.903	369	369
L8IQ44	ATRN_HUMANAttractin OS=Homo sapiens OX=9606 GN=ATRN PE=1 SV=2	1325	sp|O75882|ATRN_HUMANAttractin OS=Homo sapiens OX=9606 GN=ATRN PE=1 SV=2	O75882	0	98.11%	2673.27	1326	1301
L8IGV0	5HT1B_PANTR5-hydroxytryptamine receptor 1B OS=Pan troglodytes OX=9598 GN=HTR1B PE=3 SV=1	389	sp|P60020|5HT1B_PANTR5-hydroxytryptamine receptor 1B OS=Pan troglodytes OX=9598 GN=HTR1B PE=3 SV=1	P60020	0	93.61%	709.523	391	366
L8IDL8	GLMP_BOVINGlycosylated lysosomal membrane OS=Bos taurus OX=9913 GN=GLMP PE=2 SV=1	408	sp|Q0P5L7|GLMP_BOVINGlycosylated lysosomal membrane protein OS=Bos taurus OX=9913 GN=GLMP PE=2 SV=1	Q0P5L7	0	98.76%	800.431	404	399
L8IGX7	PNPH_BOVINPurine nucleoside phosphorylase OS=Bos taurus OX=9913 GN=PNP PE=1 SV=3	318	sp|P55859|PNPH_BOVINPurine nucleoside phosphorylase OS=Bos taurus OX=9913 GN=PNP PE=1 SV=3	P55859	0	99.31%	582.408	288	286
L8J0I1	RENR_BOVINRenin receptor OS=Bos taurus OX=9913 GN=ATP6AP2 PE=1 SV=2	337	sp|P81134|RENR_BOVINRenin receptor OS=Bos taurus OX=9913 GN=ATP6AP2 PE=1 SV=2	P81134	0	100%	689.493	337	337
L8IGL8	ADA15_HUMANDisintegrin and metallo ase domain-containing 15 OS=Homo sapiens OX=9606 GN=ADAM15 PE=1 SV=4	866	sp|Q13444|ADA15_HUMANDisintegrin and metalloproteinase domain-containing protein 15 OS=Homo sapiens OX=9606 GN=ADAM15 PE=1 SV=4	Q13444	0	89.89%	1302.35	851	765
L8I0B0	OPTN_PIGOptineurin OS=Sus scrofa OX=9823 GN=OPTN PE=1 SV=1	577	sp|Q7YS99|OPTN_PIGOptineurin OS=Sus scrofa OX=9823 GN=OPTN PE=1 SV=1	Q7YS99	0	95.16%	1015.76	579	551
L8IJN1	FABP4_BOVINFatty acid-binding adipocyte OS=Bos taurus OX=9913 GN=FABP4 PE=2 SV=2	132	sp|P48035|FABP4_BOVINFatty acid-binding protein, adipocyte OS=Bos taurus OX=9913 GN=FABP4 PE=2 SV=2	P48035	4e-91	99.24%	265.003	132	131
L8IDK5	FPPS_HUMANFarnesyl pyrophosphate synthase OS=Homo sapiens OX=9606 GN=FDPS PE=1 SV=4	420	sp|P14324|FPPS_HUMANFarnesyl pyrophosphate synthase OS=Homo sapiens OX=9606 GN=FDPS PE=1 SV=4	P14324	0	93.57%	753.051	420	393
L8IAA7	LOXL4_BOVINLysyl oxidase homolog 4 OS=Bos taurus OX=9913 GN=LOXL4 PE=2 SV=1	758	sp|Q8MJ24|LOXL4_BOVINLysyl oxidase homolog 4 OS=Bos taurus OX=9913 GN=LOXL4 PE=2 SV=1	Q8MJ24	0	99.34%	1553.5	757	752
L8HQ26	ATS1_HUMANA disintegrin and metallo ase with thrombospondin motifs 1 OS=Homo sapiens OX=9606 GN=ADAMTS1 PE=1 SV=4	964	sp|Q9UHI8|ATS1_HUMANA disintegrin and metalloproteinase with thrombospondin motifs 1 OS=Homo sapiens OX=9606 GN=ADAMTS1 PE=1 SV=4	Q9UHI8	0	83.7%	1521.52	988	827
L8IEC9	REX1B_BOVINRequired for excision 1-B domain-containing OS=Bos taurus OX=9913 GN=REX1BD PE=2 SV=1	181	sp|Q17Q97|REX1B_BOVINRequired for excision 1-B domain-containing protein OS=Bos taurus OX=9913 GN=REX1BD PE=2 SV=1	Q17Q97	4e-121	97.79%	345.125	181	177
L8ISM0	KISHB_BOVIN kish-B OS=Bos taurus OX=9913 GN=TMEM167B PE=3 SV=1	71	sp|Q0IIL4|KISHB_BOVINProtein kish-B OS=Bos taurus OX=9913 GN=TMEM167B PE=3 SV=1	Q0IIL4	2.6e-44	100%	141.354	71	71
L8IGD5	IMA6_HUMANImportin subunit alpha-6 OS=Homo sapiens OX=9606 GN=KPNA5 PE=1 SV=2	594	sp|O15131|IMA6_HUMANImportin subunit alpha-6 OS=Homo sapiens OX=9606 GN=KPNA5 PE=1 SV=2	O15131	1.7e-154	77.51%	459.914	329	255
L8ISD0	TM50B_PONABTransmembrane 50B OS=Pongo abelii OX=9601 GN=TMEM50B PE=2 SV=1	158	sp|Q5R4C3|TM50B_PONABTransmembrane protein 50B OS=Pongo abelii OX=9601 GN=TMEM50B PE=2 SV=1	Q5R4C3	1.4e-114	100%	326.635	158	158
L8IR50	MLP3B_MOUSEMicrotubule-associated s 1A 1B light chain 3B OS=Mus musculus OX=10090 GN=Map1lc3b PE=1 SV=3	184	sp|Q9CQV6|MLP3B_MOUSEMicrotubule-associated proteins 1A/1B light chain 3B OS=Mus musculus OX=10090 GN=Map1lc3b PE=1 SV=3	Q9CQV6	1.9e-32	100%	116.701	55	55
L8IV54	RAI3_HUMANRetinoic acid-induced 3 OS=Homo sapiens OX=9606 GN=GPRC5A PE=1 SV=2	359	sp|Q8NFJ5|RAI3_HUMANRetinoic acid-induced protein 3 OS=Homo sapiens OX=9606 GN=GPRC5A PE=1 SV=2	Q8NFJ5	0	86.83%	578.556	357	310
L8IJW9	CD151_BOVINCD151 antigen OS=Bos taurus OX=9913 GN=CD151 PE=2 SV=1	315	sp|Q3ZBH3|CD151_BOVINCD151 antigen OS=Bos taurus OX=9913 GN=CD151 PE=2 SV=1	Q3ZBH3	0	99.6%	519.235	253	252
L8IB79	UB2D3_HUMANUbiquitin-conjugating enzyme E2 D3 OS=Homo sapiens OX=9606 GN=UBE2D3 PE=1 SV=1	147	sp|P61077|UB2D3_HUMANUbiquitin-conjugating enzyme E2 D3 OS=Homo sapiens OX=9606 GN=UBE2D3 PE=1 SV=1	P61077	1.5e-98	94.56%	285.034	147	139
L8IPP8	SIM12_HORSESmall integral membrane 12 OS=Equus caballus OX=9796 GN=SMIM12 PE=3 SV=1	92	sp|F6USH3|SIM12_HORSESmall integral membrane protein 12 OS=Equus caballus OX=9796 GN=SMIM12 PE=3 SV=1	F6USH3	6.7e-62	98.91%	187.578	92	91
L8I9H6	TF2H1_HUMANGeneral transcription factor IIH subunit 1 OS=Homo sapiens OX=9606 GN=GTF2H1 PE=1 SV=1	548	sp|P32780|TF2H1_HUMANGeneral transcription factor IIH subunit 1 OS=Homo sapiens OX=9606 GN=GTF2H1 PE=1 SV=1	P32780	0	98.91%	1127.08	548	542
L8I6V6	PNPH_BOVINPurine nucleoside phosphorylase OS=Bos taurus OX=9913 GN=PNP PE=1 SV=3	268	sp|P55859|PNPH_BOVINPurine nucleoside phosphorylase OS=Bos taurus OX=9913 GN=PNP PE=1 SV=3	P55859	0	97.76%	526.554	268	262
L8IPA4	THEM4_BOVINAcyl-coenzyme A thioesterase THEM4 OS=Bos taurus OX=9913 GN=THEM4 PE=2 SV=1	225	sp|A1A4L1|THEM4_BOVINAcyl-coenzyme A thioesterase THEM4 OS=Bos taurus OX=9913 GN=THEM4 PE=2 SV=1	A1A4L1	1.2e-165	99.11%	461.84	225	223
L8ICV2	GPTC4_BOVING patch domain-containing 4 OS=Bos taurus OX=9913 GN=GPATCH4 PE=2 SV=1	409	sp|Q2KJE1|GPTC4_BOVING patch domain-containing protein 4 OS=Bos taurus OX=9913 GN=GPATCH4 PE=2 SV=1	Q2KJE1	0	99.27%	813.142	409	406
L8ISR7	TM128_BOVINTransmembrane 128 OS=Bos taurus OX=9913 GN=TMEM128 PE=2 SV=1	165	sp|Q3T0S0|TM128_BOVINTransmembrane protein 128 OS=Bos taurus OX=9913 GN=TMEM128 PE=2 SV=1	Q3T0S0	2.8e-118	99.39%	336.265	165	164
L8J2M2	FST_BOVINFollistatin OS=Bos taurus OX=9913 GN=FST PE=2 SV=2	342	sp|P50291|FST_BOVINFollistatin OS=Bos taurus OX=9913 GN=FST PE=2 SV=2	P50291	0	99.12%	691.034	342	339
L8IKN2	RAB3B_BOVINRas-related Rab-3B OS=Bos taurus OX=9913 GN=RAB3B PE=2 SV=1	225	sp|P10948|RAB3B_BOVINRas-related protein Rab-3B OS=Bos taurus OX=9913 GN=RAB3B PE=2 SV=1	P10948	3e-164	100%	457.603	219	219
L8IAH1	VATG1_BOVINV-type proton ATPase subunit G 1 OS=Bos taurus OX=9913 GN=ATP6V1G1 PE=1 SV=3	118	sp|P79251|VATG1_BOVINV-type proton ATPase subunit G 1 OS=Bos taurus OX=9913 GN=ATP6V1G1 PE=1 SV=3	P79251	1.2e-81	100%	239.58	118	118
L8IM79	EMP3_BOVINEpithelial membrane 3 OS=Bos taurus OX=9913 GN=EMP3 PE=2 SV=1	163	sp|Q58DR6|EMP3_BOVINEpithelial membrane protein 3 OS=Bos taurus OX=9913 GN=EMP3 PE=2 SV=1	Q58DR6	8.2e-116	100%	330.102	163	163
L8IDE2	CYTM1_BOVINCysteine-rich and transmembrane domain-containing 1 OS=Bos taurus OX=9913 GN=CYSTM1 PE=3 SV=1	103	sp|Q32LK2|CYTM1_BOVINCysteine-rich and transmembrane domain-containing protein 1 OS=Bos taurus OX=9913 GN=CYSTM1 PE=3 SV=1	Q32LK2	1.7e-65	100%	197.593	103	103
L8IN10	SATT_BOVINNeutral amino acid transporter A OS=Bos taurus OX=9913 GN=SLC1A4 PE=2 SV=1	530	sp|A2VDL4|SATT_BOVINNeutral amino acid transporter A OS=Bos taurus OX=9913 GN=SLC1A4 PE=2 SV=1	A2VDL4	0	99.81%	1062.75	530	529
L8HNI0	MALT1_HUMANMucosa-associated lymphoid tissue lymphoma translocation 1 OS=Homo sapiens OX=9606 GN=MALT1 PE=1 SV=1	759	sp|Q9UDY8|MALT1_HUMANMucosa-associated lymphoid tissue lymphoma translocation protein 1 OS=Homo sapiens OX=9606 GN=MALT1 PE=1 SV=1	Q9UDY8	0	93.81%	1431.39	759	712
L8IVX7	VAMP8_BOVINVesicle-associated membrane 8 OS=Bos taurus OX=9913 GN=VAMP8 PE=3 SV=1	111	sp|Q3T0Y8|VAMP8_BOVINVesicle-associated membrane protein 8 OS=Bos taurus OX=9913 GN=VAMP8 PE=3 SV=1	Q3T0Y8	5.3e-66	98.99%	199.134	99	98
L8I493	MSPD2_HUMANMotile sperm domain-containing 2 OS=Homo sapiens OX=9606 GN=MOSPD2 PE=1 SV=1	492	sp|Q8NHP6|MSPD2_HUMANMotile sperm domain-containing protein 2 OS=Homo sapiens OX=9606 GN=MOSPD2 PE=1 SV=1	Q8NHP6	0	95.33%	914.45	492	469
L8HL45	AHNK2_HUMAN AHNAK2 OS=Homo sapiens OX=9606 GN=AHNAK2 PE=1 SV=2	3178	sp|Q8IVF2|AHNK2_HUMANProtein AHNAK2 OS=Homo sapiens OX=9606 GN=AHNAK2 PE=1 SV=2	Q8IVF2	0	73.2%	2861.63	2802	2051
L8IAC6	GOGA7_BOVINGolgin subfamily A member 7 OS=Bos taurus OX=9913 GN=GOLGA7 PE=2 SV=1	137	sp|Q5EA55|GOGA7_BOVINGolgin subfamily A member 7 OS=Bos taurus OX=9913 GN=GOLGA7 PE=2 SV=1	Q5EA55	1.9e-98	100%	283.878	137	137
L8HRF0	JTB_HUMAN JTB OS=Homo sapiens OX=9606 GN=JTB PE=1 SV=1	146	sp|O76095|JTB_HUMANProtein JTB OS=Homo sapiens OX=9606 GN=JTB PE=1 SV=1	O76095	1.6e-92	95.89%	269.626	146	140
L8I870	AAAT_BOVINNeutral amino acid transporter B(0) OS=Bos taurus OX=9913 GN=SLC1A5 PE=2 SV=1	545	sp|Q95JC7|AAAT_BOVINNeutral amino acid transporter B(0) OS=Bos taurus OX=9913 GN=SLC1A5 PE=2 SV=1	Q95JC7	0	99.63%	1064.29	539	537
L8IIM8	IFIT3_HUMANInterferon-induced with tetratricopeptide repeats 3 OS=Homo sapiens OX=9606 GN=IFIT3 PE=1 SV=1	484	sp|O14879|IFIT3_HUMANInterferon-induced protein with tetratricopeptide repeats 3 OS=Homo sapiens OX=9606 GN=IFIT3 PE=1 SV=1	O14879	0	82.71%	685.256	480	397
L8J595	PDGFD_HUMANPlatelet-derived growth factor D OS=Homo sapiens OX=9606 GN=PDGFD PE=1 SV=1	329	sp|Q9GZP0|PDGFD_HUMANPlatelet-derived growth factor D OS=Homo sapiens OX=9606 GN=PDGFD PE=1 SV=1	Q9GZP0	0	95.74%	640.573	329	315
L8J026	TSN6_BOVINTetraspanin-6 OS=Bos taurus OX=9913 GN=TSPAN6 PE=2 SV=1	245	sp|Q32KU6|TSN6_BOVINTetraspanin-6 OS=Bos taurus OX=9913 GN=TSPAN6 PE=2 SV=1	Q32KU6	0	100%	506.523	245	245
L8IB26	S38A7_BOVIN sodium-coupled neutral amino acid transporter 7 OS=Bos taurus OX=9913 GN=SLC38A7 PE=2 SV=1	464	sp|A7E3U5|S38A7_BOVINPutative sodium-coupled neutral amino acid transporter 7 OS=Bos taurus OX=9913 GN=SLC38A7 PE=2 SV=1	A7E3U5	0	99.78%	928.702	463	462
L8I463	RGS10_BOVINRegulator of G- signaling 10 OS=Bos taurus OX=9913 GN=RGS10 PE=2 SV=1	166	sp|Q2KHW7|RGS10_BOVINRegulator of G-protein signaling 10 OS=Bos taurus OX=9913 GN=RGS10 PE=2 SV=1	Q2KHW7	4.1e-119	100%	339.347	166	166
L8IIM5	PKD2_BOVINPolycystin-2 OS=Bos taurus OX=9913 GN=PKD2 PE=2 SV=1	876	sp|Q4GZT3|PKD2_BOVINPolycystin-2 OS=Bos taurus OX=9913 GN=PKD2 PE=2 SV=1	Q4GZT3	0	99.89%	1805.8	876	875
L8IAM6	UROK_BOVINUrokinase-type plasminogen activator OS=Bos taurus OX=9913 GN=PLAU PE=2 SV=1	433	sp|Q05589|UROK_BOVINUrokinase-type plasminogen activator OS=Bos taurus OX=9913 GN=PLAU PE=2 SV=1	Q05589	0	98.61%	889.412	433	427
L8J2L7	MARH3_BOVINE3 ubiquitin- ligase MARCHF3 OS=Bos taurus OX=9913 GN=MARCHF3 PE=2 SV=1	253	sp|A0JN69|MARH3_BOVINE3 ubiquitin-protein ligase MARCHF3 OS=Bos taurus OX=9913 GN=MARCHF3 PE=2 SV=1	A0JN69	0	100%	524.242	253	253
L8IDJ1	SMG5_HUMAN SMG5 OS=Homo sapiens OX=9606 GN=SMG5 PE=1 SV=3	1025	sp|Q9UPR3|SMG5_HUMANProtein SMG5 OS=Homo sapiens OX=9606 GN=SMG5 PE=1 SV=3	Q9UPR3	0	96.59%	1841.24	1025	990
L8IJ81	ABHD4_BOVIN(Lyso)-N-acylphosphatidylethanolamine lipase OS=Bos taurus OX=9913 GN=ABHD4 PE=2 SV=1	355	sp|Q5EA59|ABHD4_BOVIN(Lyso)-N-acylphosphatidylethanolamine lipase OS=Bos taurus OX=9913 GN=ABHD4 PE=2 SV=1	Q5EA59	0	100%	708.368	342	342
L8I2U1	FCGRN_CAMDR receptor n large subunit p51 OS=Camelus dromedarius OX=9838 GN=FCGRT PE=2 SV=1	350	sp|Q2KN22|FCGRN_CAMDRIgG receptor FcRn large subunit p51 OS=Camelus dromedarius OX=9838 GN=FCGRT PE=2 SV=1	Q2KN22	0	89.61%	576.244	356	319
L8IHQ3	APOC3_BOVINApolipo C-III OS=Bos taurus OX=9913 GN=APOC3 PE=1 SV=2	100	sp|P19035|APOC3_BOVINApolipoprotein C-III OS=Bos taurus OX=9913 GN=APOC3 PE=1 SV=2	P19035	4e-56	100%	173.326	86	86
L8J5K4	CO8G_HUMANComplement component C8 gamma chain OS=Homo sapiens OX=9606 GN=C8G PE=1 SV=3	199	sp|P07360|CO8G_HUMANComplement component C8 gamma chain OS=Homo sapiens OX=9606 GN=C8G PE=1 SV=3	P07360	2.5e-72	71.86%	222.246	199	143
L8HUD1	UNC5C_MOUSENetrin receptor UNC5C OS=Mus musculus OX=10090 GN=Unc5c PE=1 SV=1	889	sp|O08747|UNC5C_MOUSENetrin receptor UNC5C OS=Mus musculus OX=10090 GN=Unc5c PE=1 SV=1	O08747	0	98.99%	1817.74	890	881
L8IB09	IL18R_HUMANInterleukin-18 receptor 1 OS=Homo sapiens OX=9606 GN=IL18R1 PE=1 SV=1	535	sp|Q13478|IL18R_HUMANInterleukin-18 receptor 1 OS=Homo sapiens OX=9606 GN=IL18R1 PE=1 SV=1	Q13478	0	82.29%	787.334	542	446
L8IKE0	CLDN1_PONABClaudin domain-containing 1 OS=Pongo abelii OX=9601 GN=CLDND1 PE=2 SV=1	288	sp|Q5RDV7|CLDN1_PONABClaudin domain-containing protein 1 OS=Pongo abelii OX=9601 GN=CLDND1 PE=2 SV=1	Q5RDV7	0	98.81%	508.834	253	250
L8ITH3	TM127_HUMANTransmembrane 127 OS=Homo sapiens OX=9606 GN=TMEM127 PE=1 SV=1	238	sp|O75204|TM127_HUMANTransmembrane protein 127 OS=Homo sapiens OX=9606 GN=TMEM127 PE=1 SV=1	O75204	1.7e-174	99.58%	484.952	238	237
L8I7V5	PGFRB_CANLFPlatelet-derived growth factor receptor beta OS=Canis lupus familiaris OX=9615 GN=PDGFRB PE=2 SV=1	1095	sp|Q6QNF3|PGFRB_CANLFPlatelet-derived growth factor receptor beta OS=Canis lupus familiaris OX=9615 GN=PDGFRB PE=2 SV=1	Q6QNF3	0	96.15%	1994.55	1092	1050
L8IUT9	DDR2_HUMANDiscoidin domain-containing receptor 2 OS=Homo sapiens OX=9606 GN=DDR2 PE=1 SV=2	828	sp|Q16832|DDR2_HUMANDiscoidin domain-containing receptor 2 OS=Homo sapiens OX=9606 GN=DDR2 PE=1 SV=2	Q16832	0	99.03%	1700.64	828	820
L8I1N5	HNRPD_HUMANHeterogeneous nuclear ribonucleo D0 OS=Homo sapiens OX=9606 GN=HNRNPD PE=1 SV=1	277	sp|Q14103|HNRPD_HUMANHeterogeneous nuclear ribonucleoprotein D0 OS=Homo sapiens OX=9606 GN=HNRNPD PE=1 SV=1	Q14103	0	100%	580.096	277	277
L8I662	ERG7_BOVINLanosterol synthase OS=Bos taurus OX=9913 GN=LSS PE=1 SV=2	732	sp|P84466|ERG7_BOVINLanosterol synthase OS=Bos taurus OX=9913 GN=LSS PE=1 SV=2	P84466	0	99.04%	1511.12	732	725
L8IIL2	APOD_BOVINApolipo D OS=Bos taurus OX=9913 GN=APOD PE=2 SV=1	199	sp|Q32KY0|APOD_BOVINApolipoprotein D OS=Bos taurus OX=9913 GN=APOD PE=2 SV=1	Q32KY0	4.1e-139	100%	391.734	189	189
L8IFJ0	TNIP1_HUMANTNFAIP3-interacting 1 OS=Homo sapiens OX=9606 GN=TNIP1 PE=1 SV=2	640	sp|Q15025|TNIP1_HUMANTNFAIP3-interacting protein 1 OS=Homo sapiens OX=9606 GN=TNIP1 PE=1 SV=2	Q15025	0	90.37%	1089.72	644	582
L8I7Q8	STX6_HUMANSyntaxin-6 OS=Homo sapiens OX=9606 GN=STX6 PE=1 SV=1	255	sp|O43752|STX6_HUMANSyntaxin-6 OS=Homo sapiens OX=9606 GN=STX6 PE=1 SV=1	O43752	2.8e-170	98.74%	475.707	239	236
L8I284	S15A4_BOVINSolute carrier family 15 member 4 OS=Bos taurus OX=9913 GN=SLC15A4 PE=2 SV=2	532	sp|A6QQL0|S15A4_BOVINSolute carrier family 15 member 4 OS=Bos taurus OX=9913 GN=SLC15A4 PE=2 SV=2	A6QQL0	0	100%	1082.4	532	532
L8IJ79	RHOB_HUMANRho-related GTP-binding OS=Homo sapiens OX=9606 GN=RHOB PE=1 SV=1	208	sp|P62745|RHOB_HUMANRho-related GTP-binding protein RhoB OS=Homo sapiens OX=9606 GN=RHOB PE=1 SV=1	P62745	4e-144	100%	405.216	196	196
L8I177	ARGI2_BOVINArginase- mitochondrial OS=Bos taurus OX=9913 GN=ARG2 PE=2 SV=1	354	sp|Q58DL1|ARGI2_BOVINArginase-2, mitochondrial OS=Bos taurus OX=9913 GN=ARG2 PE=2 SV=1	Q58DL1	0	99.72%	717.998	354	353
L8IIZ9	MPZL1_BOVINMyelin zero 1 OS=Bos taurus OX=9913 GN=MPZL1 PE=2 SV=1	243	sp|Q32PI9|MPZL1_BOVINMyelin protein zero-like protein 1 OS=Bos taurus OX=9913 GN=MPZL1 PE=2 SV=1	Q32PI9	6.3e-178	99.18%	494.967	243	241
L8IK78	NOTC2_HUMANNeurogenic locus notch homolog 2 OS=Homo sapiens OX=9606 GN=NOTCH2 PE=1 SV=3	2447	sp|Q04721|NOTC2_HUMANNeurogenic locus notch homolog protein 2 OS=Homo sapiens OX=9606 GN=NOTCH2 PE=1 SV=3	Q04721	0	98%	4747.19	2447	2398
L8IUY7	ACOD_BOVINAcyl- desaturase OS=Bos taurus OX=9913 GN=SCD PE=2 SV=2	359	sp|Q9TT94|ACOD_BOVINAcyl-CoA desaturase OS=Bos taurus OX=9913 GN=SCD PE=2 SV=2	Q9TT94	0	99.72%	745.347	359	358
L8IHA9	ARF3_MOUSEADP-ribosylation factor 3 OS=Mus musculus OX=10090 GN=Arf3 PE=2 SV=2	181	sp|P61205|ARF3_MOUSEADP-ribosylation factor 3 OS=Mus musculus OX=10090 GN=Arf3 PE=2 SV=2	P61205	3.1e-132	100%	373.244	181	181
L8IG16	FAT1_HUMANProtocadherin Fat 1 OS=Homo sapiens OX=9606 GN=FAT1 PE=1 SV=2	4588	sp|Q14517|FAT1_HUMANProtocadherin Fat 1 OS=Homo sapiens OX=9606 GN=FAT1 PE=1 SV=2	Q14517	0	95.1%	8515.98	4588	4363
L8HRK0	NBR1_HUMANNext to BRCA1 gene 1 OS=Homo sapiens OX=9606 GN=NBR1 PE=1 SV=3	982	sp|Q14596|NBR1_HUMANNext to BRCA1 gene 1 protein OS=Homo sapiens OX=9606 GN=NBR1 PE=1 SV=3	Q14596	0	88.05%	1648.64	996	877
L8HQN3	PHLA1_HUMANPleckstrin homology-like domain family A member 1 OS=Homo sapiens OX=9606 GN=PHLDA1 PE=1 SV=4	167	sp|Q8WV24|PHLA1_HUMANPleckstrin homology-like domain family A member 1 OS=Homo sapiens OX=9606 GN=PHLDA1 PE=1 SV=4	Q8WV24	5.7e-89	92.41%	270.396	158	146
L8ICI6	TPRA1_RATTransmembrane adipocyte-associated 1 OS=Rattus norvegicus OX=10116 GN=Tpra1 PE=2 SV=1	352	sp|Q791F6|TPRA1_RATTransmembrane protein adipocyte-associated 1 OS=Rattus norvegicus OX=10116 GN=Tpra1 PE=2 SV=1	Q791F6	7.7e-174	78.77%	493.426	358	282
L8IDK7	SYT11_HUMANSynaptotagmin-11 OS=Homo sapiens OX=9606 GN=SYT11 PE=1 SV=2	422	sp|Q9BT88|SYT11_HUMANSynaptotagmin-11 OS=Homo sapiens OX=9606 GN=SYT11 PE=1 SV=2	Q9BT88	0	98.11%	837.025	423	415
L8IXI6	UFO_HUMANTyrosine- kinase receptor UFO OS=Homo sapiens OX=9606 GN=AXL PE=1 SV=4	868	sp|P30530|UFO_HUMANTyrosine-protein kinase receptor UFO OS=Homo sapiens OX=9606 GN=AXL PE=1 SV=4	P30530	0	93.78%	1620.91	868	814
L8IFV7	ADAM9_HUMANDisintegrin and metallo ase domain-containing 9 OS=Homo sapiens OX=9606 GN=ADAM9 PE=1 SV=1	843	sp|Q13443|ADAM9_HUMANDisintegrin and metalloproteinase domain-containing protein 9 OS=Homo sapiens OX=9606 GN=ADAM9 PE=1 SV=1	Q13443	0	89.56%	1377.46	843	755
L8IWJ4	S6A17_HUMANSodium-dependent neutral amino acid transporter SLC6A17 OS=Homo sapiens OX=9606 GN=SLC6A17 PE=1 SV=3	731	sp|Q9H1V8|S6A17_HUMANSodium-dependent neutral amino acid transporter SLC6A17 OS=Homo sapiens OX=9606 GN=SLC6A17 PE=1 SV=3	Q9H1V8	0	98.08%	1454.11	730	716
L8IHZ4	VIAAT_RATVesicular inhibitory amino acid transporter OS=Rattus norvegicus OX=10116 GN=Slc32a1 PE=1 SV=1	526	sp|O35458|VIAAT_RATVesicular inhibitory amino acid transporter OS=Rattus norvegicus OX=10116 GN=Slc32a1 PE=1 SV=1	O35458	0	99.81%	1069.69	526	525
L8IY25	S2611_BOVINSodium-independent sulfate anion transporter OS=Bos taurus OX=9913 GN=SLC26A11 PE=2 SV=1	614	sp|Q58DD2|S2611_BOVINSodium-independent sulfate anion transporter OS=Bos taurus OX=9913 GN=SLC26A11 PE=2 SV=1	Q58DD2	0	98.05%	1207.2	614	602
L8I3Z2	CAND2_HUMANCullin-associated NEDD8-dissociated 2 OS=Homo sapiens OX=9606 GN=CAND2 PE=1 SV=3	1193	sp|O75155|CAND2_HUMANCullin-associated NEDD8-dissociated protein 2 OS=Homo sapiens OX=9606 GN=CAND2 PE=1 SV=3	O75155	0	90.71%	1979.53	1217	1104
L8HP51	TIMP2_BOVINMetallo ase inhibitor 2 OS=Bos taurus OX=9913 GN=TIMP2 PE=1 SV=2	508	sp|P16368|TIMP2_BOVINMetalloproteinase inhibitor 2 OS=Bos taurus OX=9913 GN=TIMP2 PE=1 SV=2	P16368	5.7e-103	99.31%	312.768	145	144
L8IKD7	LRP10_HUMANLow-density lipo receptor-related 10 OS=Homo sapiens OX=9606 GN=LRP10 PE=1 SV=2	713	sp|Q7Z4F1|LRP10_HUMANLow-density lipoprotein receptor-related protein 10 OS=Homo sapiens OX=9606 GN=LRP10 PE=1 SV=2	Q7Z4F1	0	91.81%	1170.61	696	639
L8IFC2	GLRX2_BOVINGlutaredoxin- mitochondrial OS=Bos taurus OX=9913 GN=GLRX2 PE=2 SV=1	157	sp|Q32L67|GLRX2_BOVINGlutaredoxin-2, mitochondrial OS=Bos taurus OX=9913 GN=GLRX2 PE=2 SV=1	Q32L67	2.1e-114	98.73%	325.865	157	155
L8J224	EPHA4_MOUSEEphrin type-A receptor 4 OS=Mus musculus OX=10090 GN=Epha4 PE=1 SV=2	996	sp|Q03137|EPHA4_MOUSEEphrin type-A receptor 4 OS=Mus musculus OX=10090 GN=Epha4 PE=1 SV=2	Q03137	0	98.59%	2029.99	996	982
L8I6Z9	CRIM1_MOUSECysteine-rich motor neuron 1 OS=Mus musculus OX=10090 GN=Crim1 PE=2 SV=2	925	sp|Q9JLL0|CRIM1_MOUSECysteine-rich motor neuron 1 protein OS=Mus musculus OX=10090 GN=Crim1 PE=2 SV=2	Q9JLL0	0	95.25%	1681.77	927	883
L8J1B1	AGRE5_BOVINAdhesion G -coupled receptor E5 OS=Bos taurus OX=9913 GN=ADGRE5 PE=2 SV=1	827	sp|Q8SQA4|AGRE5_BOVINAdhesion G protein-coupled receptor E5 OS=Bos taurus OX=9913 GN=ADGRE5 PE=2 SV=1	Q8SQA4	0	84.76%	1319.29	827	701
L8IBH8	VSTM4_HUMANV-set and transmembrane domain-containing 4 OS=Homo sapiens OX=9606 GN=VSTM4 PE=1 SV=3	321	sp|Q8IW00|VSTM4_HUMANV-set and transmembrane domain-containing protein 4 OS=Homo sapiens OX=9606 GN=VSTM4 PE=1 SV=3	Q8IW00	0	95.03%	568.155	302	287
L8HRT7	T106B_BOVINTransmembrane 106B OS=Bos taurus OX=9913 GN=TMEM106B PE=2 SV=1	275	sp|Q3ZC25|T106B_BOVINTransmembrane protein 106B OS=Bos taurus OX=9913 GN=TMEM106B PE=2 SV=1	Q3ZC25	0	100%	570.466	275	275
L8IS69	SQSTM_MOUSESequestosome-1 OS=Mus musculus OX=10090 GN=Sqstm1 PE=1 SV=1	392	sp|Q64337|SQSTM_MOUSESequestosome-1 OS=Mus musculus OX=10090 GN=Sqstm1 PE=1 SV=1	Q64337	0	86.96%	652.899	391	340
L8HLW7	STML1_HUMANStomatin 1 OS=Homo sapiens OX=9606 GN=STOML1 PE=1 SV=1	398	sp|Q9UBI4|STML1_HUMANStomatin-like protein 1 OS=Homo sapiens OX=9606 GN=STOML1 PE=1 SV=1	Q9UBI4	0	94.97%	728.398	398	378
L8INI7	TGBR3_HUMANTransforming growth factor beta receptor type 3 OS=Homo sapiens OX=9606 GN=TGFBR3 PE=1 SV=3	833	sp|Q03167|TGBR3_HUMANTransforming growth factor beta receptor type 3 OS=Homo sapiens OX=9606 GN=TGFBR3 PE=1 SV=3	Q03167	0	92.46%	1503.8	835	772
L8J3Q3	JAG1_HUMAN jagged-1 OS=Homo sapiens OX=9606 GN=JAG1 PE=1 SV=3	1213	sp|P78504|JAG1_HUMANProtein jagged-1 OS=Homo sapiens OX=9606 GN=JAG1 PE=1 SV=3	P78504	0	98.27%	2372.82	1213	1192
L8HSH3	ERG1_HUMANSqualene monooxygenase OS=Homo sapiens OX=9606 GN=SQLE PE=1 SV=3	572	sp|Q14534|ERG1_HUMANSqualene monooxygenase OS=Homo sapiens OX=9606 GN=SQLE PE=1 SV=3	Q14534	0	93.9%	1048.11	574	539
L8HRW8	RENBP_BOVINN-acylglucosamine 2-epimerase OS=Bos taurus OX=9913 GN=RENBP PE=2 SV=2	388	sp|Q2KIS1|RENBP_BOVINN-acylglucosamine 2-epimerase OS=Bos taurus OX=9913 GN=RENBP PE=2 SV=2	Q2KIS1	0	99.74%	798.119	386	385
L8IGC3	HMOX1_BOVINHeme oxygenase 1 OS=Bos taurus OX=9913 GN=HMOX1 PE=1 SV=1	324	sp|Q5E9F2|HMOX1_BOVINHeme oxygenase 1 OS=Bos taurus OX=9913 GN=HMOX1 PE=1 SV=1	Q5E9F2	0	98.96%	580.096	289	286
L8IZE6	TPRGL_BOVINTumor p63-regulated gene 1 OS=Bos taurus OX=9913 GN=TPRG1L PE=2 SV=2	206	sp|Q32LJ4|TPRGL_BOVINTumor protein p63-regulated gene 1-like protein OS=Bos taurus OX=9913 GN=TPRG1L PE=2 SV=2	Q32LJ4	1.7e-150	100%	424.091	206	206
L8IVA1	SEM3C_BOVINSemaphorin-3C OS=Bos taurus OX=9913 GN=SEMA3C PE=2 SV=1	723	sp|A7MB70|SEM3C_BOVINSemaphorin-3C OS=Bos taurus OX=9913 GN=SEMA3C PE=2 SV=1	A7MB70	0	99.45%	1515.75	723	719
L8HX22	CEGT_HUMANCeramide glucosyltransferase OS=Homo sapiens OX=9606 GN=UGCG PE=1 SV=1	394	sp|Q16739|CEGT_HUMANCeramide glucosyltransferase OS=Homo sapiens OX=9606 GN=UGCG PE=1 SV=1	Q16739	0	99.75%	818.15	394	393
L8I958	SDC2_BOVINSyndecan-2 OS=Bos taurus OX=9913 GN=SDC2 PE=2 SV=1	186	sp|Q58DD4|SDC2_BOVINSyndecan-2 OS=Bos taurus OX=9913 GN=SDC2 PE=2 SV=1	Q58DD4	3e-129	99.45%	366.696	182	181
L8J1T9	MGRN1_HUMANE3 ubiquitin- ligase MGRN1 OS=Homo sapiens OX=9606 GN=MGRN1 PE=1 SV=2	575	sp|O60291|MGRN1_HUMANE3 ubiquitin-protein ligase MGRN1 OS=Homo sapiens OX=9606 GN=MGRN1 PE=1 SV=2	O60291	0	92.7%	949.118	548	508
L8I2H4	CK096_RATUncharacterized protein C11orf96 homolog OS=Rattus norvegicus OX=10116 GN=Ag2 PE=1 SV=1	104	sp|A8IHN8|CK096_RATUncharacterized protein C11orf96 homolog OS=Rattus norvegicus OX=10116 GN=Ag2 PE=1 SV=1	A8IHN8	1.2e-57	96.15%	182.185	104	100
L8IA65	ILRL1_HUMANInterleukin-1 receptor-like 1 OS=Homo sapiens OX=9606 GN=IL1RL1 PE=1 SV=4	560	sp|Q01638|ILRL1_HUMANInterleukin-1 receptor-like 1 OS=Homo sapiens OX=9606 GN=IL1RL1 PE=1 SV=4	Q01638	0	79.17%	781.171	557	441
L8J351	PMEPA_HUMAN TMEPAI OS=Homo sapiens OX=9606 GN=PMEPA1 PE=1 SV=1	251	sp|Q969W9|PMEPA_HUMANProtein TMEPAI OS=Homo sapiens OX=9606 GN=PMEPA1 PE=1 SV=1	Q969W9	6.6e-159	95.22%	447.973	251	239
L8IRV6	CAPG_BOVINMacrophage-capping OS=Bos taurus OX=9913 GN=CAPG PE=2 SV=1	348	sp|Q865V6|CAPG_BOVINMacrophage-capping protein OS=Bos taurus OX=9913 GN=CAPG PE=2 SV=1	Q865V6	0	99.71%	713.761	348	347
L8ILX6	MFAP3_PONABMicrofibril-associated glyco 3 OS=Pongo abelii OX=9601 GN=MFAP3 PE=2 SV=1	362	sp|Q5R9E4|MFAP3_PONABMicrofibril-associated glycoprotein 3 OS=Pongo abelii OX=9601 GN=MFAP3 PE=2 SV=1	Q5R9E4	0	91.99%	657.907	362	333
L8J188	CTR2_HUMANCationic amino acid transporter 2 OS=Homo sapiens OX=9606 GN=SLC7A2 PE=1 SV=2	667	sp|P52569|CTR2_HUMANCationic amino acid transporter 2 OS=Homo sapiens OX=9606 GN=SLC7A2 PE=1 SV=2	P52569	0	94.29%	1180.62	666	628
L8HUH1	B3A2_HORSEAnion exchange 2 OS=Equus caballus OX=9796 GN=SLC4A2 PE=2 SV=1	1242	sp|Q6SJP2|B3A2_HORSEAnion exchange protein 2 OS=Equus caballus OX=9796 GN=SLC4A2 PE=2 SV=1	Q6SJP2	0	97.34%	2396.7	1239	1206
L8I9E0	APOE_BOSMUApolipo E OS=Bos mutus grunniens OX=30521 GN=APOE PE=3 SV=1	316	sp|P0DN41|APOE_BOSMUApolipoprotein E OS=Bos mutus grunniens OX=30521 GN=APOE PE=3 SV=1	P0DN41	0	100%	626.32	316	316
L8J1H5	ZDH20_BOVINPalmitoyltransferase ZDHHC20 OS=Bos taurus OX=9913 GN=ZDHHC20 PE=2 SV=1	365	sp|Q0VC89|ZDH20_BOVINPalmitoyltransferase ZDHHC20 OS=Bos taurus OX=9913 GN=ZDHHC20 PE=2 SV=1	Q0VC89	0	100%	759.599	365	365
L8IX69	LDLR_BOVINLow-density lipo receptor OS=Bos taurus OX=9913 GN=LDLR PE=1 SV=2	807	sp|P01131|LDLR_BOVINLow-density lipoprotein receptor OS=Bos taurus OX=9913 GN=LDLR PE=1 SV=2	P01131	0	97.57%	1641.71	823	803
L8IUR0	CACO2_BOVINCalcium-binding and coiled-coil domain-containing 2 OS=Bos taurus OX=9913 GN=CALCOCO2 PE=2 SV=1	477	sp|O18737|CACO2_BOVINCalcium-binding and coiled-coil domain-containing protein 2 OS=Bos taurus OX=9913 GN=CALCOCO2 PE=2 SV=1	O18737	0	94.34%	913.294	477	450
L8IYJ5	CCN1_HUMANCCN family member 1 OS=Homo sapiens OX=9606 GN=CCN1 PE=1 SV=1	382	sp|O00622|CCN1_HUMANCCN family member 1 OS=Homo sapiens OX=9606 GN=CCN1 PE=1 SV=1	O00622	0	94.24%	702.975	382	360
L8IG34	PTTG_PONABPituitary tumor-transforming gene 1 -interacting OS=Pongo abelii OX=9601 GN=PTTG1IP PE=2 SV=2	175	sp|Q5NVI6|PTTG_PONABPituitary tumor-transforming gene 1 protein-interacting protein OS=Pongo abelii OX=9601 GN=PTTG1IP PE=2 SV=2	Q5NVI6	4.2e-68	86.11%	209.92	180	155
L8IX54	GBRAP_RATGamma-aminobutyric acid receptor-associated OS=Rattus norvegicus OX=10116 GN=Gabarap PE=1 SV=1	117	sp|P60517|GBRAP_RATGamma-aminobutyric acid receptor-associated protein OS=Rattus norvegicus OX=10116 GN=Gabarap PE=1 SV=1	P60517	1.9e-81	100%	239.195	117	117
L8I3L2	SCRB1_BOVINScavenger receptor class B member 1 OS=Bos taurus OX=9913 GN=SCARB1 PE=2 SV=1	508	sp|O18824|SCRB1_BOVINScavenger receptor class B member 1 OS=Bos taurus OX=9913 GN=SCARB1 PE=2 SV=1	O18824	0	97.45%	1008.05	509	496
L8IY30	PLD3_BOVIN5 -3 exonuclease PLD3 OS=Bos taurus OX=9913 GN=PLD3 PE=2 SV=1	490	sp|Q2KJJ8|PLD3_BOVIN5'-3' exonuclease PLD3 OS=Bos taurus OX=9913 GN=PLD3 PE=2 SV=1	Q2KJJ8	0	100%	1019.22	490	490
L8IWR9	EREG_HUMANProepiregulin OS=Homo sapiens OX=9606 GN=EREG PE=1 SV=1	148	sp|O14944|EREG_HUMANProepiregulin OS=Homo sapiens OX=9606 GN=EREG PE=1 SV=1	O14944	6.2e-96	95.07%	279.256	142	135
L8J121	SDCB1_HUMANSyntenin-1 OS=Homo sapiens OX=9606 GN=SDCBP PE=1 SV=1	298	sp|O00560|SDCB1_HUMANSyntenin-1 OS=Homo sapiens OX=9606 GN=SDCBP PE=1 SV=1	O00560	0	97.65%	580.482	298	291
L8IKX6	HMCS1_CRIGRHydroxymethylglutaryl- cytoplasmic OS=Cricetulus griseus OX=10029 GN=HMGCS1 PE=3 SV=1	546	sp|P13704|HMCS1_CRIGRHydroxymethylglutaryl-CoA synthase, cytoplasmic OS=Cricetulus griseus OX=10029 GN=HMGCS1 PE=3 SV=1	P13704	0	97.5%	1042.34	520	507
L8J1B9	IL6RB_HUMANInterleukin-6 receptor subunit beta OS=Homo sapiens OX=9606 GN=IL6ST PE=1 SV=2	924	sp|P40189|IL6RB_HUMANInterleukin-6 receptor subunit beta OS=Homo sapiens OX=9606 GN=IL6ST PE=1 SV=2	P40189	0	91.68%	1615.51	925	848
L8ILQ8	FBX11_MOUSEF-box only 11 OS=Mus musculus OX=10090 GN=Fbxo11 PE=1 SV=3	851	sp|Q7TPD1|FBX11_MOUSEF-box only protein 11 OS=Mus musculus OX=10090 GN=Fbxo11 PE=1 SV=3	Q7TPD1	0	99.41%	1760.73	850	845
L8I9K6	NCOA4_HUMANNuclear receptor coactivator 4 OS=Homo sapiens OX=9606 GN=NCOA4 PE=1 SV=1	637	sp|Q13772|NCOA4_HUMANNuclear receptor coactivator 4 OS=Homo sapiens OX=9606 GN=NCOA4 PE=1 SV=1	Q13772	0	88.02%	1033.48	626	551
L8IWP2	CXA1_BOVINGap junction alpha-1 OS=Bos taurus OX=9913 GN=GJA1 PE=2 SV=2	382	sp|P18246|CXA1_BOVINGap junction alpha-1 protein OS=Bos taurus OX=9913 GN=GJA1 PE=2 SV=2	P18246	0	99.74%	792.727	383	382
L8IGK5	BACE1_BOVINBeta-secretase 1 OS=Bos taurus OX=9913 GN=BACE1 PE=2 SV=1	501	sp|Q2HJ40|BACE1_BOVINBeta-secretase 1 OS=Bos taurus OX=9913 GN=BACE1 PE=2 SV=1	Q2HJ40	0	100%	1040.8	501	501
L8IH78	ITIH3_BOVINInter-alpha-trypsin inhibitor heavy chain H3 OS=Bos taurus OX=9913 GN=ITIH3 PE=1 SV=2	891	sp|P56652|ITIH3_BOVINInter-alpha-trypsin inhibitor heavy chain H3 OS=Bos taurus OX=9913 GN=ITIH3 PE=1 SV=2	P56652	0	99.78%	1843.94	891	889
L8IP29	HGFA_CANLFHepatocyte growth factor activator OS=Canis lupus familiaris OX=9615 GN=HGFAC PE=2 SV=1	652	sp|Q6QNF4|HGFA_CANLFHepatocyte growth factor activator OS=Canis lupus familiaris OX=9615 GN=HGFAC PE=2 SV=1	Q6QNF4	0	88.13%	1078.16	657	579
L8IKT6	CATK_BOVINCathepsin K OS=Bos taurus OX=9913 GN=CTSK PE=2 SV=2	338	sp|Q5E968|CATK_BOVINCathepsin K OS=Bos taurus OX=9913 GN=CTSK PE=2 SV=2	Q5E968	0	100%	685.641	329	329
L8HSM4	SPIT2_HUMANKunitz-type protease inhibitor 2 OS=Homo sapiens OX=9606 GN=SPINT2 PE=1 SV=2	250	sp|O43291|SPIT2_HUMANKunitz-type protease inhibitor 2 OS=Homo sapiens OX=9606 GN=SPINT2 PE=1 SV=2	O43291	3.6e-126	81.75%	363.614	252	206
L8IYZ8	TM248_BOVINTransmembrane 248 OS=Bos taurus OX=9913 GN=TMEM248 PE=2 SV=1	310	sp|Q2YDM0|TM248_BOVINTransmembrane protein 248 OS=Bos taurus OX=9913 GN=TMEM248 PE=2 SV=1	Q2YDM0	0	100%	648.277	310	310
L8HVY9	HEMO_BOVINHemopexin OS=Bos taurus OX=9913 GN=HPX PE=2 SV=1	459	sp|Q3SZV7|HEMO_BOVINHemopexin OS=Bos taurus OX=9913 GN=HPX PE=2 SV=1	Q3SZV7	0	98.69%	937.562	459	453
L8IM29	MMP14_BOVINMatrix metallo ase-14 OS=Bos taurus OX=9913 GN=MMP14 PE=2 SV=1	584	sp|Q9GLE4|MMP14_BOVINMatrix metalloproteinase-14 OS=Bos taurus OX=9913 GN=MMP14 PE=2 SV=1	Q9GLE4	0	99.46%	1145.57	553	550
L8HVH0	ITM2B_BOVINIntegral membrane 2B OS=Bos taurus OX=9913 GN=ITM2B PE=2 SV=1	266	sp|Q3T0P7|ITM2B_BOVINIntegral membrane protein 2B OS=Bos taurus OX=9913 GN=ITM2B PE=2 SV=1	Q3T0P7	0	100%	550.821	266	266
L8I109	CD63_BOVINCD63 antigen OS=Bos taurus OX=9913 GN=CD63 PE=2 SV=4	240	sp|Q9XSK2|CD63_BOVINCD63 antigen OS=Bos taurus OX=9913 GN=CD63 PE=2 SV=4	Q9XSK2	6.8e-172	100%	478.404	237	237
L8I4L3	A4_SAISCAmyloid-beta A4 OS=Saimiri sciureus OX=9521 GN=APP PE=2 SV=1	723	sp|Q95241|A4_SAISCAmyloid-beta A4 protein OS=Saimiri sciureus OX=9521 GN=APP PE=2 SV=1	Q95241	0	94.19%	1376.69	723	681
L8IBF2	TNF15_HUMANTumor necrosis factor ligand superfamily member 15 OS=Homo sapiens OX=9606 GN=TNFSF15 PE=1 SV=2	256	sp|O95150|TNF15_HUMANTumor necrosis factor ligand superfamily member 15 OS=Homo sapiens OX=9606 GN=TNFSF15 PE=1 SV=2	O95150	4.6e-152	85.21%	429.483	257	219
L8IED3	TIMP3_BOVINMetallo ase inhibitor 3 OS=Bos taurus OX=9913 GN=TIMP3 PE=2 SV=1	211	sp|P79121|TIMP3_BOVINMetalloproteinase inhibitor 3 OS=Bos taurus OX=9913 GN=TIMP3 PE=2 SV=1	P79121	5.5e-158	99.53%	441.039	211	210
L8IUY4	SERC1_MOUSESerine incorporator 1 OS=Mus musculus OX=10090 GN=Serinc1 PE=1 SV=1	441	sp|Q9QZI8|SERC1_MOUSESerine incorporator 1 OS=Mus musculus OX=10090 GN=Serinc1 PE=1 SV=1	Q9QZI8	0	94.14%	817.379	444	418
L8IF42	OLR1_BOVINOxidized low-density lipo receptor 1 OS=Bos taurus OX=9913 GN=OLR1 PE=1 SV=1	273	sp|P79391|OLR1_BOVINOxidized low-density lipoprotein receptor 1 OS=Bos taurus OX=9913 GN=OLR1 PE=1 SV=1	P79391	0	98.53%	554.288	273	269
L8HSX9	TFPI2_BOVINTissue factor pathway inhibitor 2 OS=Bos taurus OX=9913 GN=TFPI2 PE=2 SV=1	234	sp|Q7YRQ8|TFPI2_BOVINTissue factor pathway inhibitor 2 OS=Bos taurus OX=9913 GN=TFPI2 PE=2 SV=1	Q7YRQ8	4.7e-174	100%	483.411	234	234
L8HVI0	CCN2_BOVINCCN family member 2 OS=Bos taurus OX=9913 GN=CCN2 PE=2 SV=2	254	sp|O18739|CCN2_BOVINCCN family member 2 OS=Bos taurus OX=9913 GN=CCN2 PE=2 SV=2	O18739	0	100%	520.39	254	254
L8IQ63	CRLD2_BOVINCysteine-rich secretory LCCL domain-containing 2 OS=Bos taurus OX=9913 GN=CRISPLD2 PE=2 SV=1	495	sp|A6QLZ7|CRLD2_BOVINCysteine-rich secretory protein LCCL domain-containing 2 OS=Bos taurus OX=9913 GN=CRISPLD2 PE=2 SV=1	A6QLZ7	0	99.4%	1024.23	496	493
L8J634	TNR12_HUMANTumor necrosis factor receptor superfamily member 12A OS=Homo sapiens OX=9606 GN=TNFRSF12A PE=1 SV=1	129	sp|Q9NP84|TNR12_HUMANTumor necrosis factor receptor superfamily member 12A OS=Homo sapiens OX=9606 GN=TNFRSF12A PE=1 SV=1	Q9NP84	3.1e-64	91.59%	196.438	107	98
L8IC85	RGN_BOVINRegucalcin OS=Bos taurus OX=9913 GN=RGN PE=2 SV=1	299	sp|Q9TTJ5|RGN_BOVINRegucalcin OS=Bos taurus OX=9913 GN=RGN PE=2 SV=1	Q9TTJ5	0	100%	622.083	299	299
L8HYP7	NFIP2_HUMANNEDD4 family-interacting 2 OS=Homo sapiens OX=9606 GN=NDFIP2 PE=1 SV=2	327	sp|Q9NV92|NFIP2_HUMANNEDD4 family-interacting protein 2 OS=Homo sapiens OX=9606 GN=NDFIP2 PE=1 SV=2	Q9NV92	1.1e-148	78.82%	427.172	340	268

## Sheet: protein2go
SeqName	Hit-Desc	GO-Group	GO-ID	GO-Term
L8HX98	LGMN_BOVINLegumain OS=Bos taurus OX=9913 GN=LGMN PE=1 SV=1	C	GO:0005576	extracellular region
L8HX98	LGMN_BOVINLegumain OS=Bos taurus OX=9913 GN=LGMN PE=1 SV=1	C	GO:0005770	late endosome
L8HX98	LGMN_BOVINLegumain OS=Bos taurus OX=9913 GN=LGMN PE=1 SV=1	C	GO:0005783	endoplasmic reticulum
L8HX98	LGMN_BOVINLegumain OS=Bos taurus OX=9913 GN=LGMN PE=1 SV=1	C	GO:0036021	endolysosome lumen
L8HX98	LGMN_BOVINLegumain OS=Bos taurus OX=9913 GN=LGMN PE=1 SV=1	C	GO:0044425	membrane part
L8HX98	LGMN_BOVINLegumain OS=Bos taurus OX=9913 GN=LGMN PE=1 SV=1	C	GO:0045177	apical part of cell
L8HX98	LGMN_BOVINLegumain OS=Bos taurus OX=9913 GN=LGMN PE=1 SV=1	C	GO:0048471	perinuclear region of cytoplasm
L8HX98	LGMN_BOVINLegumain OS=Bos taurus OX=9913 GN=LGMN PE=1 SV=1	F	GO:0004197	cysteine-type endopeptidase activity
L8HX98	LGMN_BOVINLegumain OS=Bos taurus OX=9913 GN=LGMN PE=1 SV=1	F	GO:0048156	tau protein binding
L8HX98	LGMN_BOVINLegumain OS=Bos taurus OX=9913 GN=LGMN PE=1 SV=1	P	GO:0002224	toll-like receptor signaling pathway
L8HX98	LGMN_BOVINLegumain OS=Bos taurus OX=9913 GN=LGMN PE=1 SV=1	P	GO:0003014	renal system process
L8HX98	LGMN_BOVINLegumain OS=Bos taurus OX=9913 GN=LGMN PE=1 SV=1	P	GO:0006624	vacuolar protein processing
L8HX98	LGMN_BOVINLegumain OS=Bos taurus OX=9913 GN=LGMN PE=1 SV=1	P	GO:0007613	memory
L8HX98	LGMN_BOVINLegumain OS=Bos taurus OX=9913 GN=LGMN PE=1 SV=1	P	GO:0008284	positive regulation of cell population proliferation
L8HX98	LGMN_BOVINLegumain OS=Bos taurus OX=9913 GN=LGMN PE=1 SV=1	P	GO:0008306	associative learning
L8HX98	LGMN_BOVINLegumain OS=Bos taurus OX=9913 GN=LGMN PE=1 SV=1	P	GO:0010447	response to acidic pH
L8HX98	LGMN_BOVINLegumain OS=Bos taurus OX=9913 GN=LGMN PE=1 SV=1	P	GO:0010629	negative regulation of gene expression
L8HX98	LGMN_BOVINLegumain OS=Bos taurus OX=9913 GN=LGMN PE=1 SV=1	P	GO:0019886	antigen processing and presentation of exogenous peptide antigen via MHC class II
L8HX98	LGMN_BOVINLegumain OS=Bos taurus OX=9913 GN=LGMN PE=1 SV=1	P	GO:0032801	receptor catabolic process
L8HX98	LGMN_BOVINLegumain OS=Bos taurus OX=9913 GN=LGMN PE=1 SV=1	P	GO:0035729	cellular response to hepatocyte growth factor stimulus
L8HX98	LGMN_BOVINLegumain OS=Bos taurus OX=9913 GN=LGMN PE=1 SV=1	P	GO:0040015	negative regulation of multicellular organism growth
L8HX98	LGMN_BOVINLegumain OS=Bos taurus OX=9913 GN=LGMN PE=1 SV=1	P	GO:0042359	vitamin D metabolic process
L8HX98	LGMN_BOVINLegumain OS=Bos taurus OX=9913 GN=LGMN PE=1 SV=1	P	GO:0043524	negative regulation of neuron apoptotic process
L8HX98	LGMN_BOVINLegumain OS=Bos taurus OX=9913 GN=LGMN PE=1 SV=1	P	GO:0045931	positive regulation of mitotic cell cycle
L8HX98	LGMN_BOVINLegumain OS=Bos taurus OX=9913 GN=LGMN PE=1 SV=1	P	GO:0051603	proteolysis involved in cellular protein catabolic process
L8HX98	LGMN_BOVINLegumain OS=Bos taurus OX=9913 GN=LGMN PE=1 SV=1	P	GO:0071277	cellular response to calcium ion
L8HX98	LGMN_BOVINLegumain OS=Bos taurus OX=9913 GN=LGMN PE=1 SV=1	P	GO:0090026	positive regulation of monocyte chemotaxis
L8HX98	LGMN_BOVINLegumain OS=Bos taurus OX=9913 GN=LGMN PE=1 SV=1	P	GO:0097061	dendritic spine organization
L8HX98	LGMN_BOVINLegumain OS=Bos taurus OX=9913 GN=LGMN PE=1 SV=1	P	GO:0097202	activation of cysteine-type endopeptidase activity
L8HX98	LGMN_BOVINLegumain OS=Bos taurus OX=9913 GN=LGMN PE=1 SV=1	P	GO:0097264	self proteolysis
L8HX98	LGMN_BOVINLegumain OS=Bos taurus OX=9913 GN=LGMN PE=1 SV=1	P	GO:1900273	positive regulation of long-term synaptic potentiation
L8HX98	LGMN_BOVINLegumain OS=Bos taurus OX=9913 GN=LGMN PE=1 SV=1	P	GO:1901185	negative regulation of ERBB signaling pathway
L8HX98	LGMN_BOVINLegumain OS=Bos taurus OX=9913 GN=LGMN PE=1 SV=1	P	GO:1904646	cellular response to amyloid-beta
L8HX98	LGMN_BOVINLegumain OS=Bos taurus OX=9913 GN=LGMN PE=1 SV=1	P	GO:2001028	positive regulation of endothelial cell chemotaxis
L8I7C0	NUA4L_BOVINNADH dehydrogenase	C	GO:0005747	mitochondrial respiratory chain complex I
L8I7C0	NUA4L_BOVINNADH dehydrogenase	C	GO:0005751	mitochondrial respiratory chain complex IV
L8I7C0	NUA4L_BOVINNADH dehydrogenase	F	GO:0004129	cytochrome-c oxidase activity
L8I7C0	NUA4L_BOVINNADH dehydrogenase	F	GO:0005515	protein binding
L8I7C0	NUA4L_BOVINNADH dehydrogenase	F	GO:0008137	NADH dehydrogenase (ubiquinone) activity
L8I7C0	NUA4L_BOVINNADH dehydrogenase	F	GO:0044877	protein-containing complex binding
L8I7C0	NUA4L_BOVINNADH dehydrogenase	P	GO:0006120	mitochondrial electron transport, NADH to ubiquinone
L8I7C0	NUA4L_BOVINNADH dehydrogenase	P	GO:0006123	mitochondrial electron transport, cytochrome c to oxygen
L8I7C0	NUA4L_BOVINNADH dehydrogenase	P	GO:1902600	proton transmembrane transport
L8I7C0	NUA4L_BOVINNADH dehydrogenase	P	GO:0015992	proton transmembrane transport
L8I7C0	NUA4L_BOVINNADH dehydrogenase	P	GO:0006744	ubiquinone biosynthetic process
L8I7C0	NUA4L_BOVINNADH dehydrogenase	P	GO:0006814	sodium ion transport
L8I8M2	A1AG_BOVINAlpha-1-acid glyco OS=Bos taurus OX=9913 GN=ORM1 PE=2 SV=1	C	GO:0005615	extracellular space
L8I8M2	A1AG_BOVINAlpha-1-acid glyco OS=Bos taurus OX=9913 GN=ORM1 PE=2 SV=1	C	GO:0031093	platelet alpha granule lumen
L8I8M2	A1AG_BOVINAlpha-1-acid glyco OS=Bos taurus OX=9913 GN=ORM1 PE=2 SV=1	C	GO:0035580	specific granule lumen
L8I8M2	A1AG_BOVINAlpha-1-acid glyco OS=Bos taurus OX=9913 GN=ORM1 PE=2 SV=1	F	GO:0008144	drug binding
L8I8M2	A1AG_BOVINAlpha-1-acid glyco OS=Bos taurus OX=9913 GN=ORM1 PE=2 SV=1	P	GO:0002438	acute inflammatory response to antigenic stimulus
L8I8M2	A1AG_BOVINAlpha-1-acid glyco OS=Bos taurus OX=9913 GN=ORM1 PE=2 SV=1	P	GO:0002439	chronic inflammatory response to antigenic stimulus
L8I8M2	A1AG_BOVINAlpha-1-acid glyco OS=Bos taurus OX=9913 GN=ORM1 PE=2 SV=1	P	GO:0002682	regulation of immune system process
L8I8M2	A1AG_BOVINAlpha-1-acid glyco OS=Bos taurus OX=9913 GN=ORM1 PE=2 SV=1	P	GO:0006953	acute-phase response
L8I8M2	A1AG_BOVINAlpha-1-acid glyco OS=Bos taurus OX=9913 GN=ORM1 PE=2 SV=1	P	GO:0031100	animal organ regeneration
L8I8M2	A1AG_BOVINAlpha-1-acid glyco OS=Bos taurus OX=9913 GN=ORM1 PE=2 SV=1	P	GO:0032496	response to lipopolysaccharide
L8I8M2	A1AG_BOVINAlpha-1-acid glyco OS=Bos taurus OX=9913 GN=ORM1 PE=2 SV=1	P	GO:0033197	response to vitamin E
L8I8M2	A1AG_BOVINAlpha-1-acid glyco OS=Bos taurus OX=9913 GN=ORM1 PE=2 SV=1	P	GO:0042493	response to drug
L8I8M2	A1AG_BOVINAlpha-1-acid glyco OS=Bos taurus OX=9913 GN=ORM1 PE=2 SV=1	P	GO:0050718	positive regulation of interleukin-1 beta secretion
L8I8M2	A1AG_BOVINAlpha-1-acid glyco OS=Bos taurus OX=9913 GN=ORM1 PE=2 SV=1	P	GO:0071300	cellular response to retinoic acid
L8I8M2	A1AG_BOVINAlpha-1-acid glyco OS=Bos taurus OX=9913 GN=ORM1 PE=2 SV=1	P	GO:0071378	cellular response to growth hormone stimulus
L8I8M2	A1AG_BOVINAlpha-1-acid glyco OS=Bos taurus OX=9913 GN=ORM1 PE=2 SV=1	P	GO:0071385	cellular response to glucocorticoid stimulus
L8HZM0	MRP_BOVINMARCKS-related OS=Bos taurus OX=9913 GN=MARCKSL1 PE=2 SV=1	C	GO:0005856	cytoskeleton
L8HZM0	MRP_BOVINMARCKS-related OS=Bos taurus OX=9913 GN=MARCKSL1 PE=2 SV=1	C	GO:0008021	synaptic vesicle
L8HZM0	MRP_BOVINMARCKS-related OS=Bos taurus OX=9913 GN=MARCKSL1 PE=2 SV=1	C	GO:0099026	anchored component of presynaptic membrane
L8HZM0	MRP_BOVINMARCKS-related OS=Bos taurus OX=9913 GN=MARCKSL1 PE=2 SV=1	C	GO:0099523	presynaptic cytosol
L8HZM0	MRP_BOVINMARCKS-related OS=Bos taurus OX=9913 GN=MARCKSL1 PE=2 SV=1	F	GO:0003779	actin binding
L8HZM0	MRP_BOVINMARCKS-related OS=Bos taurus OX=9913 GN=MARCKSL1 PE=2 SV=1	F	GO:0005516	calmodulin binding
L8HZM0	MRP_BOVINMARCKS-related OS=Bos taurus OX=9913 GN=MARCKSL1 PE=2 SV=1	F	GO:0099626	voltage-gated calcium channel activity involved in regulation of presynaptic cytosolic calcium levels
L8HZM0	MRP_BOVINMARCKS-related OS=Bos taurus OX=9913 GN=MARCKSL1 PE=2 SV=1	P	GO:0008284	positive regulation of cell population proliferation
L8HZM0	MRP_BOVINMARCKS-related OS=Bos taurus OX=9913 GN=MARCKSL1 PE=2 SV=1	P	GO:0099509	regulation of presynaptic cytosolic calcium ion concentration
L8IM56	SPA38_BOVINSerpin A3-8 OS=Bos taurus OX=9913 GN=SERPINA3-8 PE=2 SV=1	C	GO:0005615	extracellular space
L8IM56	SPA38_BOVINSerpin A3-8 OS=Bos taurus OX=9913 GN=SERPINA3-8 PE=2 SV=1	C	GO:0031093	platelet alpha granule lumen
L8IM56	SPA38_BOVINSerpin A3-8 OS=Bos taurus OX=9913 GN=SERPINA3-8 PE=2 SV=1	C	GO:0042583	chromaffin granule
L8IM56	SPA38_BOVINSerpin A3-8 OS=Bos taurus OX=9913 GN=SERPINA3-8 PE=2 SV=1	F	GO:0003677	DNA binding
L8IM56	SPA38_BOVINSerpin A3-8 OS=Bos taurus OX=9913 GN=SERPINA3-8 PE=2 SV=1	F	GO:0004867	serine-type endopeptidase inhibitor activity
L8IM56	SPA38_BOVINSerpin A3-8 OS=Bos taurus OX=9913 GN=SERPINA3-8 PE=2 SV=1	F	GO:0004869	cysteine-type endopeptidase inhibitor activity
L8IM56	SPA38_BOVINSerpin A3-8 OS=Bos taurus OX=9913 GN=SERPINA3-8 PE=2 SV=1	F	GO:0005515	protein binding
L8IM56	SPA38_BOVINSerpin A3-8 OS=Bos taurus OX=9913 GN=SERPINA3-8 PE=2 SV=1	P	GO:0010951	negative regulation of endopeptidase activity
L8HTX7	APOA2_BOVINApolipo A-II OS=Bos taurus OX=9913 GN=APOA2 PE=1 SV=2	C	GO:0034361	very-low-density lipoprotein particle
L8HTX7	APOA2_BOVINApolipo A-II OS=Bos taurus OX=9913 GN=APOA2 PE=1 SV=2	C	GO:0034366	spherical high-density lipoprotein particle
L8HTX7	APOA2_BOVINApolipo A-II OS=Bos taurus OX=9913 GN=APOA2 PE=1 SV=2	C	GO:0042627	chylomicron
L8HTX7	APOA2_BOVINApolipo A-II OS=Bos taurus OX=9913 GN=APOA2 PE=1 SV=2	F	GO:0008035	high-density lipoprotein particle binding
L8HTX7	APOA2_BOVINApolipo A-II OS=Bos taurus OX=9913 GN=APOA2 PE=1 SV=2	F	GO:0015485	cholesterol binding
L8HTX7	APOA2_BOVINApolipo A-II OS=Bos taurus OX=9913 GN=APOA2 PE=1 SV=2	F	GO:0017129	triglyceride binding
L8HTX7	APOA2_BOVINApolipo A-II OS=Bos taurus OX=9913 GN=APOA2 PE=1 SV=2	F	GO:0031072	heat shock protein binding
L8HTX7	APOA2_BOVINApolipo A-II OS=Bos taurus OX=9913 GN=APOA2 PE=1 SV=2	F	GO:0031210	phosphatidylcholine binding
L8HTX7	APOA2_BOVINApolipo A-II OS=Bos taurus OX=9913 GN=APOA2 PE=1 SV=2	F	GO:0034190	apolipoprotein receptor binding
L8HTX7	APOA2_BOVINApolipo A-II OS=Bos taurus OX=9913 GN=APOA2 PE=1 SV=2	F	GO:0042803	protein homodimerization activity
L8HTX7	APOA2_BOVINApolipo A-II OS=Bos taurus OX=9913 GN=APOA2 PE=1 SV=2	F	GO:0046982	protein heterodimerization activity
L8HTX7	APOA2_BOVINApolipo A-II OS=Bos taurus OX=9913 GN=APOA2 PE=1 SV=2	F	GO:0055102	lipase inhibitor activity
L8HTX7	APOA2_BOVINApolipo A-II OS=Bos taurus OX=9913 GN=APOA2 PE=1 SV=2	F	GO:0060228	phosphatidylcholine-sterol O-acyltransferase activator activity
L8HTX7	APOA2_BOVINApolipo A-II OS=Bos taurus OX=9913 GN=APOA2 PE=1 SV=2	F	GO:0070653	high-density lipoprotein particle receptor binding
L8HTX7	APOA2_BOVINApolipo A-II OS=Bos taurus OX=9913 GN=APOA2 PE=1 SV=2	F	GO:0120020	cholesterol transfer activity
L8HTX7	APOA2_BOVINApolipo A-II OS=Bos taurus OX=9913 GN=APOA2 PE=1 SV=2	P	GO:0002740	negative regulation of cytokine secretion involved in immune response
L8HTX7	APOA2_BOVINApolipo A-II OS=Bos taurus OX=9913 GN=APOA2 PE=1 SV=2	P	GO:0006656	phosphatidylcholine biosynthetic process
L8HTX7	APOA2_BOVINApolipo A-II OS=Bos taurus OX=9913 GN=APOA2 PE=1 SV=2	P	GO:0008203	cholesterol metabolic process
L8HTX7	APOA2_BOVINApolipo A-II OS=Bos taurus OX=9913 GN=APOA2 PE=1 SV=2	P	GO:0009395	phospholipid catabolic process
L8HTX7	APOA2_BOVINApolipo A-II OS=Bos taurus OX=9913 GN=APOA2 PE=1 SV=2	P	GO:0009749	response to glucose
L8HTX7	APOA2_BOVINApolipo A-II OS=Bos taurus OX=9913 GN=APOA2 PE=1 SV=2	P	GO:0010873	positive regulation of cholesterol esterification
L8HTX7	APOA2_BOVINApolipo A-II OS=Bos taurus OX=9913 GN=APOA2 PE=1 SV=2	P	GO:0010903	negative regulation of very-low-density lipoprotein particle remodeling
L8HTX7	APOA2_BOVINApolipo A-II OS=Bos taurus OX=9913 GN=APOA2 PE=1 SV=2	P	GO:0018158	protein oxidation
L8HTX7	APOA2_BOVINApolipo A-II OS=Bos taurus OX=9913 GN=APOA2 PE=1 SV=2	P	GO:0018206	peptidyl-methionine modification
L8HTX7	APOA2_BOVINApolipo A-II OS=Bos taurus OX=9913 GN=APOA2 PE=1 SV=2	P	GO:0030300	regulation of intestinal cholesterol absorption
L8HTX7	APOA2_BOVINApolipo A-II OS=Bos taurus OX=9913 GN=APOA2 PE=1 SV=2	P	GO:0033344	cholesterol efflux
L8HTX7	APOA2_BOVINApolipo A-II OS=Bos taurus OX=9913 GN=APOA2 PE=1 SV=2	P	GO:0033700	phospholipid efflux
L8HTX7	APOA2_BOVINApolipo A-II OS=Bos taurus OX=9913 GN=APOA2 PE=1 SV=2	P	GO:0034374	low-density lipoprotein particle remodeling
L8HTX7	APOA2_BOVINApolipo A-II OS=Bos taurus OX=9913 GN=APOA2 PE=1 SV=2	P	GO:0034375	high-density lipoprotein particle remodeling
L8HTX7	APOA2_BOVINApolipo A-II OS=Bos taurus OX=9913 GN=APOA2 PE=1 SV=2	P	GO:0034380	high-density lipoprotein particle assembly
L8HTX7	APOA2_BOVINApolipo A-II OS=Bos taurus OX=9913 GN=APOA2 PE=1 SV=2	P	GO:0034384	high-density lipoprotein particle clearance
L8HTX7	APOA2_BOVINApolipo A-II OS=Bos taurus OX=9913 GN=APOA2 PE=1 SV=2	P	GO:0042157	lipoprotein metabolic process
L8HTX7	APOA2_BOVINApolipo A-II OS=Bos taurus OX=9913 GN=APOA2 PE=1 SV=2	P	GO:0042632	cholesterol homeostasis
L8HTX7	APOA2_BOVINApolipo A-II OS=Bos taurus OX=9913 GN=APOA2 PE=1 SV=2	P	GO:0042742	defense response to bacterium
L8HTX7	APOA2_BOVINApolipo A-II OS=Bos taurus OX=9913 GN=APOA2 PE=1 SV=2	P	GO:0043085	positive regulation of catalytic activity
L8HTX7	APOA2_BOVINApolipo A-II OS=Bos taurus OX=9913 GN=APOA2 PE=1 SV=2	P	GO:0043691	reverse cholesterol transport
L8HTX7	APOA2_BOVINApolipo A-II OS=Bos taurus OX=9913 GN=APOA2 PE=1 SV=2	P	GO:0045416	positive regulation of interleukin-8 biosynthetic process
L8HTX7	APOA2_BOVINApolipo A-II OS=Bos taurus OX=9913 GN=APOA2 PE=1 SV=2	P	GO:0046340	diacylglycerol catabolic process
L8HTX7	APOA2_BOVINApolipo A-II OS=Bos taurus OX=9913 GN=APOA2 PE=1 SV=2	P	GO:0050766	positive regulation of phagocytosis
L8HTX7	APOA2_BOVINApolipo A-II OS=Bos taurus OX=9913 GN=APOA2 PE=1 SV=2	P	GO:0050821	protein stabilization
L8HTX7	APOA2_BOVINApolipo A-II OS=Bos taurus OX=9913 GN=APOA2 PE=1 SV=2	P	GO:0050995	negative regulation of lipid catabolic process
L8HTX7	APOA2_BOVINApolipo A-II OS=Bos taurus OX=9913 GN=APOA2 PE=1 SV=2	P	GO:0050996	positive regulation of lipid catabolic process
L8HTX7	APOA2_BOVINApolipo A-II OS=Bos taurus OX=9913 GN=APOA2 PE=1 SV=2	P	GO:0060192	negative regulation of lipase activity
L8HTX7	APOA2_BOVINApolipo A-II OS=Bos taurus OX=9913 GN=APOA2 PE=1 SV=2	P	GO:0060621	negative regulation of cholesterol import
L8HTX7	APOA2_BOVINApolipo A-II OS=Bos taurus OX=9913 GN=APOA2 PE=1 SV=2	P	GO:0060695	negative regulation of cholesterol transporter activity
L8IT90	FETA_BOVINAlpha-feto OS=Bos taurus OX=9913 GN=AFP PE=2 SV=1	C	GO:0005615	extracellular space
L8IT90	FETA_BOVINAlpha-feto OS=Bos taurus OX=9913 GN=AFP PE=2 SV=1	C	GO:0005788	endoplasmic reticulum lumen
L8IT90	FETA_BOVINAlpha-feto OS=Bos taurus OX=9913 GN=AFP PE=2 SV=1	F	GO:0005504	fatty acid binding
L8IT90	FETA_BOVINAlpha-feto OS=Bos taurus OX=9913 GN=AFP PE=2 SV=1	F	GO:0005515	protein binding
L8IT90	FETA_BOVINAlpha-feto OS=Bos taurus OX=9913 GN=AFP PE=2 SV=1	F	GO:0008270	zinc ion binding
L8IT90	FETA_BOVINAlpha-feto OS=Bos taurus OX=9913 GN=AFP PE=2 SV=1	P	GO:0001542	ovulation from ovarian follicle
L8IT90	FETA_BOVINAlpha-feto OS=Bos taurus OX=9913 GN=AFP PE=2 SV=1	P	GO:0001889	liver development
L8IT90	FETA_BOVINAlpha-feto OS=Bos taurus OX=9913 GN=AFP PE=2 SV=1	P	GO:0010033	response to organic substance
L8IT90	FETA_BOVINAlpha-feto OS=Bos taurus OX=9913 GN=AFP PE=2 SV=1	P	GO:0031016	pancreas development
L8IT90	FETA_BOVINAlpha-feto OS=Bos taurus OX=9913 GN=AFP PE=2 SV=1	P	GO:0031100	animal organ regeneration
L8IT90	FETA_BOVINAlpha-feto OS=Bos taurus OX=9913 GN=AFP PE=2 SV=1	P	GO:0042448	progesterone metabolic process
L8IT90	FETA_BOVINAlpha-feto OS=Bos taurus OX=9913 GN=AFP PE=2 SV=1	P	GO:0043687	post-translational protein modification
L8IT90	FETA_BOVINAlpha-feto OS=Bos taurus OX=9913 GN=AFP PE=2 SV=1	P	GO:0060395	SMAD protein signal transduction
L8IT90	FETA_BOVINAlpha-feto OS=Bos taurus OX=9913 GN=AFP PE=2 SV=1	P	GO:0071693	protein transport within extracellular region
L8IH11	TXNIP_PIGThioredoxin-interacting OS=Sus scrofa OX=9823 GN=TXNIP PE=2 SV=1	C	GO:0005634	nucleus
L8IH11	TXNIP_PIGThioredoxin-interacting OS=Sus scrofa OX=9823 GN=TXNIP PE=2 SV=1	C	GO:0005758	mitochondrial intermembrane space
L8IH11	TXNIP_PIGThioredoxin-interacting OS=Sus scrofa OX=9823 GN=TXNIP PE=2 SV=1	C	GO:0005768	endosome
L8IH11	TXNIP_PIGThioredoxin-interacting OS=Sus scrofa OX=9823 GN=TXNIP PE=2 SV=1	C	GO:0005829	cytosol
L8IH11	TXNIP_PIGThioredoxin-interacting OS=Sus scrofa OX=9823 GN=TXNIP PE=2 SV=1	C	GO:0005886	plasma membrane
L8IH11	TXNIP_PIGThioredoxin-interacting OS=Sus scrofa OX=9823 GN=TXNIP PE=2 SV=1	C	GO:1903561	extracellular vesicle
L8IH11	TXNIP_PIGThioredoxin-interacting OS=Sus scrofa OX=9823 GN=TXNIP PE=2 SV=1	F	GO:0004857	enzyme inhibitor activity
L8IH11	TXNIP_PIGThioredoxin-interacting OS=Sus scrofa OX=9823 GN=TXNIP PE=2 SV=1	F	GO:0031625	ubiquitin protein ligase binding
L8IH11	TXNIP_PIGThioredoxin-interacting OS=Sus scrofa OX=9823 GN=TXNIP PE=2 SV=1	F	GO:0031699	beta-3 adrenergic receptor binding
L8IH11	TXNIP_PIGThioredoxin-interacting OS=Sus scrofa OX=9823 GN=TXNIP PE=2 SV=1	F	GO:1990756	protein binding, bridging involved in substrate recognition for ubiquitination
L8IH11	TXNIP_PIGThioredoxin-interacting OS=Sus scrofa OX=9823 GN=TXNIP PE=2 SV=1	P	GO:0000122	negative regulation of transcription by RNA polymerase II
L8IH11	TXNIP_PIGThioredoxin-interacting OS=Sus scrofa OX=9823 GN=TXNIP PE=2 SV=1	P	GO:0006511	ubiquitin-dependent protein catabolic process
L8IH11	TXNIP_PIGThioredoxin-interacting OS=Sus scrofa OX=9823 GN=TXNIP PE=2 SV=1	P	GO:0006606	protein import into nucleus
L8IH11	TXNIP_PIGThioredoxin-interacting OS=Sus scrofa OX=9823 GN=TXNIP PE=2 SV=1	P	GO:0007049	cell cycle
L8IH11	TXNIP_PIGThioredoxin-interacting OS=Sus scrofa OX=9823 GN=TXNIP PE=2 SV=1	P	GO:0009612	response to mechanical stimulus
L8IH11	TXNIP_PIGThioredoxin-interacting OS=Sus scrofa OX=9823 GN=TXNIP PE=2 SV=1	P	GO:0009749	response to glucose
L8IH11	TXNIP_PIGThioredoxin-interacting OS=Sus scrofa OX=9823 GN=TXNIP PE=2 SV=1	P	GO:0030216	keratinocyte differentiation
L8IH11	TXNIP_PIGThioredoxin-interacting OS=Sus scrofa OX=9823 GN=TXNIP PE=2 SV=1	P	GO:0032355	response to estradiol
L8IH11	TXNIP_PIGThioredoxin-interacting OS=Sus scrofa OX=9823 GN=TXNIP PE=2 SV=1	P	GO:0032570	response to progesterone
L8IH11	TXNIP_PIGThioredoxin-interacting OS=Sus scrofa OX=9823 GN=TXNIP PE=2 SV=1	P	GO:0042127	regulation of cell population proliferation
L8IH11	TXNIP_PIGThioredoxin-interacting OS=Sus scrofa OX=9823 GN=TXNIP PE=2 SV=1	P	GO:0042542	response to hydrogen peroxide
L8IH11	TXNIP_PIGThioredoxin-interacting OS=Sus scrofa OX=9823 GN=TXNIP PE=2 SV=1	P	GO:0043065	positive regulation of apoptotic process
L8IH11	TXNIP_PIGThioredoxin-interacting OS=Sus scrofa OX=9823 GN=TXNIP PE=2 SV=1	P	GO:0043086	negative regulation of catalytic activity
L8IH11	TXNIP_PIGThioredoxin-interacting OS=Sus scrofa OX=9823 GN=TXNIP PE=2 SV=1	P	GO:0048008	platelet-derived growth factor receptor signaling pathway
L8IH11	TXNIP_PIGThioredoxin-interacting OS=Sus scrofa OX=9823 GN=TXNIP PE=2 SV=1	P	GO:0051443	positive regulation of ubiquitin-protein transferase activity
L8IH11	TXNIP_PIGThioredoxin-interacting OS=Sus scrofa OX=9823 GN=TXNIP PE=2 SV=1	P	GO:0051592	response to calcium ion
L8IH11	TXNIP_PIGThioredoxin-interacting OS=Sus scrofa OX=9823 GN=TXNIP PE=2 SV=1	P	GO:0051782	negative regulation of cell division
L8IH11	TXNIP_PIGThioredoxin-interacting OS=Sus scrofa OX=9823 GN=TXNIP PE=2 SV=1	P	GO:0065008	regulation of biological quality
L8IH11	TXNIP_PIGThioredoxin-interacting OS=Sus scrofa OX=9823 GN=TXNIP PE=2 SV=1	P	GO:0071228	cellular response to tumor cell
L8IH11	TXNIP_PIGThioredoxin-interacting OS=Sus scrofa OX=9823 GN=TXNIP PE=2 SV=1	P	GO:0140112	extracellular vesicle biogenesis
L8HN27	FETUB_BOVINFetuin-B OS=Bos taurus OX=9913 GN=FETUB PE=1 SV=1	C	GO:0005615	extracellular space
L8HN27	FETUB_BOVINFetuin-B OS=Bos taurus OX=9913 GN=FETUB PE=1 SV=1	C	GO:0043227	membrane-bounded organelle
L8HN27	FETUB_BOVINFetuin-B OS=Bos taurus OX=9913 GN=FETUB PE=1 SV=1	F	GO:0004869	cysteine-type endopeptidase inhibitor activity
L8HN27	FETUB_BOVINFetuin-B OS=Bos taurus OX=9913 GN=FETUB PE=1 SV=1	F	GO:0008191	metalloendopeptidase inhibitor activity
L8HN27	FETUB_BOVINFetuin-B OS=Bos taurus OX=9913 GN=FETUB PE=1 SV=1	P	GO:0007339	binding of sperm to zona pellucida
L8HN27	FETUB_BOVINFetuin-B OS=Bos taurus OX=9913 GN=FETUB PE=1 SV=1	P	GO:0010951	negative regulation of endopeptidase activity
L8J2N7	A2AP_BOVINAlpha-2-antiplasmin OS=Bos taurus OX=9913 GN=SERPINF2 PE=1 SV=2	C	GO:0005577	fibrinogen complex
L8J2N7	A2AP_BOVINAlpha-2-antiplasmin OS=Bos taurus OX=9913 GN=SERPINF2 PE=1 SV=2	C	GO:0009986	cell surface
L8J2N7	A2AP_BOVINAlpha-2-antiplasmin OS=Bos taurus OX=9913 GN=SERPINF2 PE=1 SV=2	C	GO:0031093	platelet alpha granule lumen
L8J2N7	A2AP_BOVINAlpha-2-antiplasmin OS=Bos taurus OX=9913 GN=SERPINF2 PE=1 SV=2	F	GO:0002020	protease binding
L8J2N7	A2AP_BOVINAlpha-2-antiplasmin OS=Bos taurus OX=9913 GN=SERPINF2 PE=1 SV=2	F	GO:0004867	serine-type endopeptidase inhibitor activity
L8J2N7	A2AP_BOVINAlpha-2-antiplasmin OS=Bos taurus OX=9913 GN=SERPINF2 PE=1 SV=2	F	GO:0042803	protein homodimerization activity
L8J2N7	A2AP_BOVINAlpha-2-antiplasmin OS=Bos taurus OX=9913 GN=SERPINF2 PE=1 SV=2	P	GO:0002034	regulation of blood vessel diameter by renin-angiotensin
L8J2N7	A2AP_BOVINAlpha-2-antiplasmin OS=Bos taurus OX=9913 GN=SERPINF2 PE=1 SV=2	P	GO:0002576	platelet degranulation
L8J2N7	A2AP_BOVINAlpha-2-antiplasmin OS=Bos taurus OX=9913 GN=SERPINF2 PE=1 SV=2	P	GO:0006953	acute-phase response
L8J2N7	A2AP_BOVINAlpha-2-antiplasmin OS=Bos taurus OX=9913 GN=SERPINF2 PE=1 SV=2	P	GO:0010033	response to organic substance
L8J2N7	A2AP_BOVINAlpha-2-antiplasmin OS=Bos taurus OX=9913 GN=SERPINF2 PE=1 SV=2	P	GO:0010757	negative regulation of plasminogen activation
L8J2N7	A2AP_BOVINAlpha-2-antiplasmin OS=Bos taurus OX=9913 GN=SERPINF2 PE=1 SV=2	P	GO:0010951	negative regulation of endopeptidase activity
L8J2N7	A2AP_BOVINAlpha-2-antiplasmin OS=Bos taurus OX=9913 GN=SERPINF2 PE=1 SV=2	P	GO:0030199	collagen fibril organization
L8J2N7	A2AP_BOVINAlpha-2-antiplasmin OS=Bos taurus OX=9913 GN=SERPINF2 PE=1 SV=2	P	GO:0032967	positive regulation of collagen biosynthetic process
L8J2N7	A2AP_BOVINAlpha-2-antiplasmin OS=Bos taurus OX=9913 GN=SERPINF2 PE=1 SV=2	P	GO:0045597	positive regulation of cell differentiation
L8J2N7	A2AP_BOVINAlpha-2-antiplasmin OS=Bos taurus OX=9913 GN=SERPINF2 PE=1 SV=2	P	GO:0045944	positive regulation of transcription by RNA polymerase II
L8J2N7	A2AP_BOVINAlpha-2-antiplasmin OS=Bos taurus OX=9913 GN=SERPINF2 PE=1 SV=2	P	GO:0046330	positive regulation of JNK cascade
L8J2N7	A2AP_BOVINAlpha-2-antiplasmin OS=Bos taurus OX=9913 GN=SERPINF2 PE=1 SV=2	P	GO:0048514	blood vessel morphogenesis
L8J2N7	A2AP_BOVINAlpha-2-antiplasmin OS=Bos taurus OX=9913 GN=SERPINF2 PE=1 SV=2	P	GO:0048661	positive regulation of smooth muscle cell proliferation
L8J2N7	A2AP_BOVINAlpha-2-antiplasmin OS=Bos taurus OX=9913 GN=SERPINF2 PE=1 SV=2	P	GO:0051496	positive regulation of stress fiber assembly
L8J2N7	A2AP_BOVINAlpha-2-antiplasmin OS=Bos taurus OX=9913 GN=SERPINF2 PE=1 SV=2	P	GO:0051918	negative regulation of fibrinolysis
L8J2N7	A2AP_BOVINAlpha-2-antiplasmin OS=Bos taurus OX=9913 GN=SERPINF2 PE=1 SV=2	P	GO:0070374	positive regulation of ERK1 and ERK2 cascade
L8J2N7	A2AP_BOVINAlpha-2-antiplasmin OS=Bos taurus OX=9913 GN=SERPINF2 PE=1 SV=2	P	GO:0071636	positive regulation of transforming growth factor beta production
L8J2N7	A2AP_BOVINAlpha-2-antiplasmin OS=Bos taurus OX=9913 GN=SERPINF2 PE=1 SV=2	P	GO:2000026	regulation of multicellular organismal development
L8J2N7	A2AP_BOVINAlpha-2-antiplasmin OS=Bos taurus OX=9913 GN=SERPINF2 PE=1 SV=2	P	GO:2000049	positive regulation of cell-cell adhesion mediated by cadherin
L8IFL3	PTN_BOVINPleiotrophin OS=Bos taurus OX=9913 GN=PTN PE=1 SV=2	C	GO:0005604	basement membrane
L8IFL3	PTN_BOVINPleiotrophin OS=Bos taurus OX=9913 GN=PTN PE=1 SV=2	C	GO:0005615	extracellular space
L8IFL3	PTN_BOVINPleiotrophin OS=Bos taurus OX=9913 GN=PTN PE=1 SV=2	C	GO:0005783	endoplasmic reticulum
L8IFL3	PTN_BOVINPleiotrophin OS=Bos taurus OX=9913 GN=PTN PE=1 SV=2	C	GO:0009986	cell surface
L8IFL3	PTN_BOVINPleiotrophin OS=Bos taurus OX=9913 GN=PTN PE=1 SV=2	C	GO:0031594	neuromuscular junction
L8IFL3	PTN_BOVINPleiotrophin OS=Bos taurus OX=9913 GN=PTN PE=1 SV=2	C	GO:0042995	cell projection
L8IFL3	PTN_BOVINPleiotrophin OS=Bos taurus OX=9913 GN=PTN PE=1 SV=2	C	GO:0048471	perinuclear region of cytoplasm
L8IFL3	PTN_BOVINPleiotrophin OS=Bos taurus OX=9913 GN=PTN PE=1 SV=2	C	GO:0098793	presynapse
L8IFL3	PTN_BOVINPleiotrophin OS=Bos taurus OX=9913 GN=PTN PE=1 SV=2	C	GO:0098794	postsynapse
L8IFL3	PTN_BOVINPleiotrophin OS=Bos taurus OX=9913 GN=PTN PE=1 SV=2	F	GO:0004864	protein phosphatase inhibitor activity
L8IFL3	PTN_BOVINPleiotrophin OS=Bos taurus OX=9913 GN=PTN PE=1 SV=2	F	GO:0005178	integrin binding
L8IFL3	PTN_BOVINPleiotrophin OS=Bos taurus OX=9913 GN=PTN PE=1 SV=2	F	GO:0008083	growth factor activity
L8IFL3	PTN_BOVINPleiotrophin OS=Bos taurus OX=9913 GN=PTN PE=1 SV=2	F	GO:0008201	heparin binding
L8IFL3	PTN_BOVINPleiotrophin OS=Bos taurus OX=9913 GN=PTN PE=1 SV=2	F	GO:0019901	protein kinase binding
L8IFL3	PTN_BOVINPleiotrophin OS=Bos taurus OX=9913 GN=PTN PE=1 SV=2	F	GO:0035373	chondroitin sulfate proteoglycan binding
L8IFL3	PTN_BOVINPleiotrophin OS=Bos taurus OX=9913 GN=PTN PE=1 SV=2	F	GO:0035374	chondroitin sulfate binding
L8IFL3	PTN_BOVINPleiotrophin OS=Bos taurus OX=9913 GN=PTN PE=1 SV=2	F	GO:0038085	vascular endothelial growth factor binding
L8IFL3	PTN_BOVINPleiotrophin OS=Bos taurus OX=9913 GN=PTN PE=1 SV=2	F	GO:0045545	syndecan binding
L8IFL3	PTN_BOVINPleiotrophin OS=Bos taurus OX=9913 GN=PTN PE=1 SV=2	F	GO:1904399	heparan sulfate binding
L8IFL3	PTN_BOVINPleiotrophin OS=Bos taurus OX=9913 GN=PTN PE=1 SV=2	P	GO:0001662	behavioral fear response
L8IFL3	PTN_BOVINPleiotrophin OS=Bos taurus OX=9913 GN=PTN PE=1 SV=2	P	GO:0002232	leukocyte chemotaxis involved in inflammatory response
L8IFL3	PTN_BOVINPleiotrophin OS=Bos taurus OX=9913 GN=PTN PE=1 SV=2	P	GO:0002286	T cell activation involved in immune response
L8IFL3	PTN_BOVINPleiotrophin OS=Bos taurus OX=9913 GN=PTN PE=1 SV=2	P	GO:0007185	transmembrane receptor protein tyrosine phosphatase signaling pathway
L8IFL3	PTN_BOVINPleiotrophin OS=Bos taurus OX=9913 GN=PTN PE=1 SV=2	P	GO:0007219	Notch signaling pathway
L8IFL3	PTN_BOVINPleiotrophin OS=Bos taurus OX=9913 GN=PTN PE=1 SV=2	P	GO:0007229	integrin-mediated signaling pathway
L8IFL3	PTN_BOVINPleiotrophin OS=Bos taurus OX=9913 GN=PTN PE=1 SV=2	P	GO:0007406	negative regulation of neuroblast proliferation
L8IFL3	PTN_BOVINPleiotrophin OS=Bos taurus OX=9913 GN=PTN PE=1 SV=2	P	GO:0007507	heart development
L8IFL3	PTN_BOVINPleiotrophin OS=Bos taurus OX=9913 GN=PTN PE=1 SV=2	P	GO:0007612	learning
L8IFL3	PTN_BOVINPleiotrophin OS=Bos taurus OX=9913 GN=PTN PE=1 SV=2	P	GO:0007614	short-term memory
L8IFL3	PTN_BOVINPleiotrophin OS=Bos taurus OX=9913 GN=PTN PE=1 SV=2	P	GO:0008360	regulation of cell shape
L8IFL3	PTN_BOVINPleiotrophin OS=Bos taurus OX=9913 GN=PTN PE=1 SV=2	P	GO:0010594	regulation of endothelial cell migration
L8IFL3	PTN_BOVINPleiotrophin OS=Bos taurus OX=9913 GN=PTN PE=1 SV=2	P	GO:0010667	negative regulation of cardiac muscle cell apoptotic process
L8IFL3	PTN_BOVINPleiotrophin OS=Bos taurus OX=9913 GN=PTN PE=1 SV=2	P	GO:0010718	positive regulation of epithelial to mesenchymal transition
L8IFL3	PTN_BOVINPleiotrophin OS=Bos taurus OX=9913 GN=PTN PE=1 SV=2	P	GO:0010759	positive regulation of macrophage chemotaxis
L8IFL3	PTN_BOVINPleiotrophin OS=Bos taurus OX=9913 GN=PTN PE=1 SV=2	P	GO:0010838	positive regulation of keratinocyte proliferation
L8IFL3	PTN_BOVINPleiotrophin OS=Bos taurus OX=9913 GN=PTN PE=1 SV=2	P	GO:0010996	response to auditory stimulus
L8IFL3	PTN_BOVINPleiotrophin OS=Bos taurus OX=9913 GN=PTN PE=1 SV=2	P	GO:0014823	response to activity
L8IFL3	PTN_BOVINPleiotrophin OS=Bos taurus OX=9913 GN=PTN PE=1 SV=2	P	GO:0016525	negative regulation of angiogenesis
L8IFL3	PTN_BOVINPleiotrophin OS=Bos taurus OX=9913 GN=PTN PE=1 SV=2	P	GO:0021510	spinal cord development
L8IFL3	PTN_BOVINPleiotrophin OS=Bos taurus OX=9913 GN=PTN PE=1 SV=2	P	GO:0021542	dentate gyrus development
L8IFL3	PTN_BOVINPleiotrophin OS=Bos taurus OX=9913 GN=PTN PE=1 SV=2	P	GO:0021681	cerebellar granular layer development
L8IFL3	PTN_BOVINPleiotrophin OS=Bos taurus OX=9913 GN=PTN PE=1 SV=2	P	GO:0021794	thalamus development
L8IFL3	PTN_BOVINPleiotrophin OS=Bos taurus OX=9913 GN=PTN PE=1 SV=2	P	GO:0021987	cerebral cortex development
L8IFL3	PTN_BOVINPleiotrophin OS=Bos taurus OX=9913 GN=PTN PE=1 SV=2	P	GO:0030279	negative regulation of ossification
L8IFL3	PTN_BOVINPleiotrophin OS=Bos taurus OX=9913 GN=PTN PE=1 SV=2	P	GO:0030324	lung development
L8IFL3	PTN_BOVINPleiotrophin OS=Bos taurus OX=9913 GN=PTN PE=1 SV=2	P	GO:0030325	adrenal gland development
L8IFL3	PTN_BOVINPleiotrophin OS=Bos taurus OX=9913 GN=PTN PE=1 SV=2	P	GO:0030336	negative regulation of cell migration
L8IFL3	PTN_BOVINPleiotrophin OS=Bos taurus OX=9913 GN=PTN PE=1 SV=2	P	GO:0030421	defecation
L8IFL3	PTN_BOVINPleiotrophin OS=Bos taurus OX=9913 GN=PTN PE=1 SV=2	P	GO:0030501	positive regulation of bone mineralization
L8IFL3	PTN_BOVINPleiotrophin OS=Bos taurus OX=9913 GN=PTN PE=1 SV=2	P	GO:0031104	dendrite regeneration
L8IFL3	PTN_BOVINPleiotrophin OS=Bos taurus OX=9913 GN=PTN PE=1 SV=2	P	GO:0031641	regulation of myelination
L8IFL3	PTN_BOVINPleiotrophin OS=Bos taurus OX=9913 GN=PTN PE=1 SV=2	P	GO:0032330	regulation of chondrocyte differentiation
L8IFL3	PTN_BOVINPleiotrophin OS=Bos taurus OX=9913 GN=PTN PE=1 SV=2	P	GO:0032355	response to estradiol
L8IFL3	PTN_BOVINPleiotrophin OS=Bos taurus OX=9913 GN=PTN PE=1 SV=2	P	GO:0032515	negative regulation of phosphoprotein phosphatase activity
L8IFL3	PTN_BOVINPleiotrophin OS=Bos taurus OX=9913 GN=PTN PE=1 SV=2	P	GO:0032570	response to progesterone
L8IFL3	PTN_BOVINPleiotrophin OS=Bos taurus OX=9913 GN=PTN PE=1 SV=2	P	GO:0034644	cellular response to UV
L8IFL3	PTN_BOVINPleiotrophin OS=Bos taurus OX=9913 GN=PTN PE=1 SV=2	P	GO:0036120	cellular response to platelet-derived growth factor stimulus
L8IFL3	PTN_BOVINPleiotrophin OS=Bos taurus OX=9913 GN=PTN PE=1 SV=2	P	GO:0042246	tissue regeneration
L8IFL3	PTN_BOVINPleiotrophin OS=Bos taurus OX=9913 GN=PTN PE=1 SV=2	P	GO:0043065	positive regulation of apoptotic process
L8IFL3	PTN_BOVINPleiotrophin OS=Bos taurus OX=9913 GN=PTN PE=1 SV=2	P	GO:0043524	negative regulation of neuron apoptotic process
L8IFL3	PTN_BOVINPleiotrophin OS=Bos taurus OX=9913 GN=PTN PE=1 SV=2	P	GO:0043932	ossification involved in bone remodeling
L8IFL3	PTN_BOVINPleiotrophin OS=Bos taurus OX=9913 GN=PTN PE=1 SV=2	P	GO:0044849	estrous cycle
L8IFL3	PTN_BOVINPleiotrophin OS=Bos taurus OX=9913 GN=PTN PE=1 SV=2	P	GO:0045446	endothelial cell differentiation
L8IFL3	PTN_BOVINPleiotrophin OS=Bos taurus OX=9913 GN=PTN PE=1 SV=2	P	GO:0045582	positive regulation of T cell differentiation
L8IFL3	PTN_BOVINPleiotrophin OS=Bos taurus OX=9913 GN=PTN PE=1 SV=2	P	GO:0045590	negative regulation of regulatory T cell differentiation
L8IFL3	PTN_BOVINPleiotrophin OS=Bos taurus OX=9913 GN=PTN PE=1 SV=2	P	GO:0045837	negative regulation of membrane potential
L8IFL3	PTN_BOVINPleiotrophin OS=Bos taurus OX=9913 GN=PTN PE=1 SV=2	P	GO:0045893	positive regulation of transcription, DNA-templated
L8IFL3	PTN_BOVINPleiotrophin OS=Bos taurus OX=9913 GN=PTN PE=1 SV=2	P	GO:0046697	decidualization
L8IFL3	PTN_BOVINPleiotrophin OS=Bos taurus OX=9913 GN=PTN PE=1 SV=2	P	GO:0046850	regulation of bone remodeling
L8IFL3	PTN_BOVINPleiotrophin OS=Bos taurus OX=9913 GN=PTN PE=1 SV=2	P	GO:0048477	oogenesis
L8IFL3	PTN_BOVINPleiotrophin OS=Bos taurus OX=9913 GN=PTN PE=1 SV=2	P	GO:0048680	positive regulation of axon regeneration
L8IFL3	PTN_BOVINPleiotrophin OS=Bos taurus OX=9913 GN=PTN PE=1 SV=2	P	GO:0048714	positive regulation of oligodendrocyte differentiation
L8IFL3	PTN_BOVINPleiotrophin OS=Bos taurus OX=9913 GN=PTN PE=1 SV=2	P	GO:0050680	negative regulation of epithelial cell proliferation
L8IFL3	PTN_BOVINPleiotrophin OS=Bos taurus OX=9913 GN=PTN PE=1 SV=2	P	GO:0050795	regulation of behavior
L8IFL3	PTN_BOVINPleiotrophin OS=Bos taurus OX=9913 GN=PTN PE=1 SV=2	P	GO:0051384	response to glucocorticoid
L8IFL3	PTN_BOVINPleiotrophin OS=Bos taurus OX=9913 GN=PTN PE=1 SV=2	P	GO:0051781	positive regulation of cell division
L8IFL3	PTN_BOVINPleiotrophin OS=Bos taurus OX=9913 GN=PTN PE=1 SV=2	P	GO:0060221	retinal rod cell differentiation
L8IFL3	PTN_BOVINPleiotrophin OS=Bos taurus OX=9913 GN=PTN PE=1 SV=2	P	GO:0060253	negative regulation of glial cell proliferation
L8IFL3	PTN_BOVINPleiotrophin OS=Bos taurus OX=9913 GN=PTN PE=1 SV=2	P	GO:0061036	positive regulation of cartilage development
L8IFL3	PTN_BOVINPleiotrophin OS=Bos taurus OX=9913 GN=PTN PE=1 SV=2	P	GO:0071305	cellular response to vitamin D
L8IFL3	PTN_BOVINPleiotrophin OS=Bos taurus OX=9913 GN=PTN PE=1 SV=2	P	GO:0071456	cellular response to hypoxia
L8IFL3	PTN_BOVINPleiotrophin OS=Bos taurus OX=9913 GN=PTN PE=1 SV=2	P	GO:0071673	positive regulation of smooth muscle cell chemotaxis
L8IFL3	PTN_BOVINPleiotrophin OS=Bos taurus OX=9913 GN=PTN PE=1 SV=2	P	GO:0072201	negative regulation of mesenchymal cell proliferation
L8IFL3	PTN_BOVINPleiotrophin OS=Bos taurus OX=9913 GN=PTN PE=1 SV=2	P	GO:0090023	positive regulation of neutrophil chemotaxis
L8IFL3	PTN_BOVINPleiotrophin OS=Bos taurus OX=9913 GN=PTN PE=1 SV=2	P	GO:0090090	negative regulation of canonical Wnt signaling pathway
L8IFL3	PTN_BOVINPleiotrophin OS=Bos taurus OX=9913 GN=PTN PE=1 SV=2	P	GO:0106015	negative regulation of inflammatory response to wounding
L8IFL3	PTN_BOVINPleiotrophin OS=Bos taurus OX=9913 GN=PTN PE=1 SV=2	P	GO:0106016	positive regulation of inflammatory response to wounding
L8IFL3	PTN_BOVINPleiotrophin OS=Bos taurus OX=9913 GN=PTN PE=1 SV=2	P	GO:0106091	glial cell projection elongation
L8IFL3	PTN_BOVINPleiotrophin OS=Bos taurus OX=9913 GN=PTN PE=1 SV=2	P	GO:0140059	dendrite arborization
L8IFL3	PTN_BOVINPleiotrophin OS=Bos taurus OX=9913 GN=PTN PE=1 SV=2	P	GO:1900006	positive regulation of dendrite development
L8IFL3	PTN_BOVINPleiotrophin OS=Bos taurus OX=9913 GN=PTN PE=1 SV=2	P	GO:1900026	positive regulation of substrate adhesion-dependent cell spreading
L8IFL3	PTN_BOVINPleiotrophin OS=Bos taurus OX=9913 GN=PTN PE=1 SV=2	P	GO:1900272	negative regulation of long-term synaptic potentiation
L8IFL3	PTN_BOVINPleiotrophin OS=Bos taurus OX=9913 GN=PTN PE=1 SV=2	P	GO:1904036	negative regulation of epithelial cell apoptotic process
L8IFL3	PTN_BOVINPleiotrophin OS=Bos taurus OX=9913 GN=PTN PE=1 SV=2	P	GO:1904373	response to kainic acid
L8IFL3	PTN_BOVINPleiotrophin OS=Bos taurus OX=9913 GN=PTN PE=1 SV=2	P	GO:1904389	rod bipolar cell differentiation
L8IFL3	PTN_BOVINPleiotrophin OS=Bos taurus OX=9913 GN=PTN PE=1 SV=2	P	GO:1904391	response to ciliary neurotrophic factor
L8IFL3	PTN_BOVINPleiotrophin OS=Bos taurus OX=9913 GN=PTN PE=1 SV=2	P	GO:1904395	positive regulation of skeletal muscle acetylcholine-gated channel clustering
L8IFL3	PTN_BOVINPleiotrophin OS=Bos taurus OX=9913 GN=PTN PE=1 SV=2	P	GO:1904397	negative regulation of neuromuscular junction development
L8IFL3	PTN_BOVINPleiotrophin OS=Bos taurus OX=9913 GN=PTN PE=1 SV=2	P	GO:1904996	positive regulation of leukocyte adhesion to vascular endothelial cell
L8IFL3	PTN_BOVINPleiotrophin OS=Bos taurus OX=9913 GN=PTN PE=1 SV=2	P	GO:1905555	positive regulation blood vessel branching
L8IFL3	PTN_BOVINPleiotrophin OS=Bos taurus OX=9913 GN=PTN PE=1 SV=2	P	GO:1905564	positive regulation of vascular endothelial cell proliferation
L8IFL3	PTN_BOVINPleiotrophin OS=Bos taurus OX=9913 GN=PTN PE=1 SV=2	P	GO:1905653	positive regulation of artery morphogenesis
L8IFL3	PTN_BOVINPleiotrophin OS=Bos taurus OX=9913 GN=PTN PE=1 SV=2	P	GO:1990089	response to nerve growth factor
L8IFL3	PTN_BOVINPleiotrophin OS=Bos taurus OX=9913 GN=PTN PE=1 SV=2	P	GO:2000036	regulation of stem cell population maintenance
L8IFL3	PTN_BOVINPleiotrophin OS=Bos taurus OX=9913 GN=PTN PE=1 SV=2	P	GO:2000179	positive regulation of neural precursor cell proliferation
L8IFL3	PTN_BOVINPleiotrophin OS=Bos taurus OX=9913 GN=PTN PE=1 SV=2	P	GO:2000249	regulation of actin cytoskeleton reorganization
L8IFL3	PTN_BOVINPleiotrophin OS=Bos taurus OX=9913 GN=PTN PE=1 SV=2	P	GO:2000347	positive regulation of hepatocyte proliferation
L8IFL3	PTN_BOVINPleiotrophin OS=Bos taurus OX=9913 GN=PTN PE=1 SV=2	P	GO:2000391	positive regulation of neutrophil extravasation
L8IFL3	PTN_BOVINPleiotrophin OS=Bos taurus OX=9913 GN=PTN PE=1 SV=2	P	GO:2000738	positive regulation of stem cell differentiation
L8IFL3	PTN_BOVINPleiotrophin OS=Bos taurus OX=9913 GN=PTN PE=1 SV=2	P	GO:2001184	positive regulation of interleukin-12 secretion
L8IFL3	PTN_BOVINPleiotrophin OS=Bos taurus OX=9913 GN=PTN PE=1 SV=2	P	GO:2001224	positive regulation of neuron migration
L8IFL3	PTN_BOVINPleiotrophin OS=Bos taurus OX=9913 GN=PTN PE=1 SV=2	C	GO:0008305	integrin complex
L8ITU9	H14_HUMANHistone OS=Homo sapiens OX=9606 GN=H1-4 PE=1 SV=2	C	GO:0000788	nuclear nucleosome
L8ITU9	H14_HUMANHistone OS=Homo sapiens OX=9606 GN=H1-4 PE=1 SV=2	C	GO:0005719	nuclear euchromatin
L8ITU9	H14_HUMANHistone OS=Homo sapiens OX=9606 GN=H1-4 PE=1 SV=2	C	GO:0005720	nuclear heterochromatin
L8ITU9	H14_HUMANHistone OS=Homo sapiens OX=9606 GN=H1-4 PE=1 SV=2	C	GO:0005730	nucleolus
L8ITU9	H14_HUMANHistone OS=Homo sapiens OX=9606 GN=H1-4 PE=1 SV=2	C	GO:0035327	transcriptionally active chromatin
L8ITU9	H14_HUMANHistone OS=Homo sapiens OX=9606 GN=H1-4 PE=1 SV=2	F	GO:0003690	double-stranded DNA binding
L8ITU9	H14_HUMANHistone OS=Homo sapiens OX=9606 GN=H1-4 PE=1 SV=2	F	GO:0005509	calcium ion binding
L8ITU9	H14_HUMANHistone OS=Homo sapiens OX=9606 GN=H1-4 PE=1 SV=2	F	GO:0005524	ATP binding
L8ITU9	H14_HUMANHistone OS=Homo sapiens OX=9606 GN=H1-4 PE=1 SV=2	F	GO:0005525	GTP binding
L8ITU9	H14_HUMANHistone OS=Homo sapiens OX=9606 GN=H1-4 PE=1 SV=2	F	GO:0016208	AMP binding
L8ITU9	H14_HUMANHistone OS=Homo sapiens OX=9606 GN=H1-4 PE=1 SV=2	F	GO:0031492	nucleosomal DNA binding
L8ITU9	H14_HUMANHistone OS=Homo sapiens OX=9606 GN=H1-4 PE=1 SV=2	F	GO:0032564	dATP binding
L8ITU9	H14_HUMANHistone OS=Homo sapiens OX=9606 GN=H1-4 PE=1 SV=2	F	GO:0042826	histone deacetylase binding
L8ITU9	H14_HUMANHistone OS=Homo sapiens OX=9606 GN=H1-4 PE=1 SV=2	F	GO:0043531	ADP binding
L8ITU9	H14_HUMANHistone OS=Homo sapiens OX=9606 GN=H1-4 PE=1 SV=2	P	GO:0000122	negative regulation of transcription by RNA polymerase II
L8ITU9	H14_HUMANHistone OS=Homo sapiens OX=9606 GN=H1-4 PE=1 SV=2	P	GO:0006334	nucleosome assembly
L8ITU9	H14_HUMANHistone OS=Homo sapiens OX=9606 GN=H1-4 PE=1 SV=2	P	GO:0007517	muscle organ development
L8ITU9	H14_HUMANHistone OS=Homo sapiens OX=9606 GN=H1-4 PE=1 SV=2	P	GO:0016584	nucleosome positioning
L8ITU9	H14_HUMANHistone OS=Homo sapiens OX=9606 GN=H1-4 PE=1 SV=2	P	GO:0030261	chromosome condensation
L8ITU9	H14_HUMANHistone OS=Homo sapiens OX=9606 GN=H1-4 PE=1 SV=2	P	GO:0030307	positive regulation of cell growth
L8ITU9	H14_HUMANHistone OS=Homo sapiens OX=9606 GN=H1-4 PE=1 SV=2	P	GO:0031936	negative regulation of chromatin silencing
L8ITU9	H14_HUMANHistone OS=Homo sapiens OX=9606 GN=H1-4 PE=1 SV=2	P	GO:0045910	negative regulation of DNA recombination
L8ITU9	H14_HUMANHistone OS=Homo sapiens OX=9606 GN=H1-4 PE=1 SV=2	P	GO:0050821	protein stabilization
L8ITU9	H14_HUMANHistone OS=Homo sapiens OX=9606 GN=H1-4 PE=1 SV=2	P	GO:0051574	positive regulation of histone H3-K9 methylation
L8ITU9	H14_HUMANHistone OS=Homo sapiens OX=9606 GN=H1-4 PE=1 SV=2	P	GO:0071169	establishment of protein localization to chromatin
L8ITU9	H14_HUMANHistone OS=Homo sapiens OX=9606 GN=H1-4 PE=1 SV=2	P	GO:0080182	histone H3-K4 trimethylation
L8ITU9	H14_HUMANHistone OS=Homo sapiens OX=9606 GN=H1-4 PE=1 SV=2	P	GO:0098532	histone H3-K27 trimethylation
L8ITU9	H14_HUMANHistone OS=Homo sapiens OX=9606 GN=H1-4 PE=1 SV=2	C	GO:0000118	histone deacetylase complex
L8IIU6	A1AT_BOVINAlpha-1-anti ase OS=Bos taurus OX=9913 GN=SERPINA1 PE=1 SV=1	C	GO:0005615	extracellular space
L8IIU6	A1AT_BOVINAlpha-1-anti ase OS=Bos taurus OX=9913 GN=SERPINA1 PE=1 SV=1	C	GO:0005783	endoplasmic reticulum
L8IIU6	A1AT_BOVINAlpha-1-anti ase OS=Bos taurus OX=9913 GN=SERPINA1 PE=1 SV=1	C	GO:0005794	Golgi apparatus
L8IIU6	A1AT_BOVINAlpha-1-anti ase OS=Bos taurus OX=9913 GN=SERPINA1 PE=1 SV=1	C	GO:1904813	ficolin-1-rich granule lumen
L8IIU6	A1AT_BOVINAlpha-1-anti ase OS=Bos taurus OX=9913 GN=SERPINA1 PE=1 SV=1	F	GO:0002020	protease binding
L8IIU6	A1AT_BOVINAlpha-1-anti ase OS=Bos taurus OX=9913 GN=SERPINA1 PE=1 SV=1	F	GO:0004867	serine-type endopeptidase inhibitor activity
L8IIU6	A1AT_BOVINAlpha-1-anti ase OS=Bos taurus OX=9913 GN=SERPINA1 PE=1 SV=1	F	GO:0042802	identical protein binding
L8IIU6	A1AT_BOVINAlpha-1-anti ase OS=Bos taurus OX=9913 GN=SERPINA1 PE=1 SV=1	P	GO:0006888	endoplasmic reticulum to Golgi vesicle-mediated transport
L8IIU6	A1AT_BOVINAlpha-1-anti ase OS=Bos taurus OX=9913 GN=SERPINA1 PE=1 SV=1	P	GO:0006953	acute-phase response
L8IIU6	A1AT_BOVINAlpha-1-anti ase OS=Bos taurus OX=9913 GN=SERPINA1 PE=1 SV=1	P	GO:0007596	blood coagulation
L8IIU6	A1AT_BOVINAlpha-1-anti ase OS=Bos taurus OX=9913 GN=SERPINA1 PE=1 SV=1	P	GO:0010951	negative regulation of endopeptidase activity
L8IIU6	A1AT_BOVINAlpha-1-anti ase OS=Bos taurus OX=9913 GN=SERPINA1 PE=1 SV=1	P	GO:0043312	neutrophil degranulation
L8IIU6	A1AT_BOVINAlpha-1-anti ase OS=Bos taurus OX=9913 GN=SERPINA1 PE=1 SV=1	P	GO:0043687	post-translational protein modification
L8I0I4	PPT1_BOVINPalmitoyl- thioesterase 1 OS=Bos taurus OX=9913 GN=PPT1 PE=1 SV=1	C	GO:0005615	extracellular space
L8I0I4	PPT1_BOVINPalmitoyl- thioesterase 1 OS=Bos taurus OX=9913 GN=PPT1 PE=1 SV=1	C	GO:0005634	nucleus
L8I0I4	PPT1_BOVINPalmitoyl- thioesterase 1 OS=Bos taurus OX=9913 GN=PPT1 PE=1 SV=1	C	GO:0005794	Golgi apparatus
L8I0I4	PPT1_BOVINPalmitoyl- thioesterase 1 OS=Bos taurus OX=9913 GN=PPT1 PE=1 SV=1	C	GO:0005829	cytosol
L8I0I4	PPT1_BOVINPalmitoyl- thioesterase 1 OS=Bos taurus OX=9913 GN=PPT1 PE=1 SV=1	C	GO:0008021	synaptic vesicle
L8I0I4	PPT1_BOVINPalmitoyl- thioesterase 1 OS=Bos taurus OX=9913 GN=PPT1 PE=1 SV=1	C	GO:0030424	axon
L8I0I4	PPT1_BOVINPalmitoyl- thioesterase 1 OS=Bos taurus OX=9913 GN=PPT1 PE=1 SV=1	C	GO:0030425	dendrite
L8I0I4	PPT1_BOVINPalmitoyl- thioesterase 1 OS=Bos taurus OX=9913 GN=PPT1 PE=1 SV=1	C	GO:0043025	neuronal cell body
L8I0I4	PPT1_BOVINPalmitoyl- thioesterase 1 OS=Bos taurus OX=9913 GN=PPT1 PE=1 SV=1	C	GO:0043202	lysosomal lumen
L8I0I4	PPT1_BOVINPalmitoyl- thioesterase 1 OS=Bos taurus OX=9913 GN=PPT1 PE=1 SV=1	C	GO:0045121	membrane raft
L8I0I4	PPT1_BOVINPalmitoyl- thioesterase 1 OS=Bos taurus OX=9913 GN=PPT1 PE=1 SV=1	F	GO:0005515	protein binding
L8I0I4	PPT1_BOVINPalmitoyl- thioesterase 1 OS=Bos taurus OX=9913 GN=PPT1 PE=1 SV=1	F	GO:0008474	palmitoyl-(protein) hydrolase activity
L8I0I4	PPT1_BOVINPalmitoyl- thioesterase 1 OS=Bos taurus OX=9913 GN=PPT1 PE=1 SV=1	F	GO:0016290	palmitoyl-CoA hydrolase activity
L8I0I4	PPT1_BOVINPalmitoyl- thioesterase 1 OS=Bos taurus OX=9913 GN=PPT1 PE=1 SV=1	P	GO:0002084	protein depalmitoylation
L8I0I4	PPT1_BOVINPalmitoyl- thioesterase 1 OS=Bos taurus OX=9913 GN=PPT1 PE=1 SV=1	P	GO:0007042	lysosomal lumen acidification
L8I0I4	PPT1_BOVINPalmitoyl- thioesterase 1 OS=Bos taurus OX=9913 GN=PPT1 PE=1 SV=1	P	GO:0007269	neurotransmitter secretion
L8I0I4	PPT1_BOVINPalmitoyl- thioesterase 1 OS=Bos taurus OX=9913 GN=PPT1 PE=1 SV=1	P	GO:0007420	brain development
L8I0I4	PPT1_BOVINPalmitoyl- thioesterase 1 OS=Bos taurus OX=9913 GN=PPT1 PE=1 SV=1	P	GO:0007601	visual perception
L8I0I4	PPT1_BOVINPalmitoyl- thioesterase 1 OS=Bos taurus OX=9913 GN=PPT1 PE=1 SV=1	P	GO:0007625	grooming behavior
L8I0I4	PPT1_BOVINPalmitoyl- thioesterase 1 OS=Bos taurus OX=9913 GN=PPT1 PE=1 SV=1	P	GO:0008306	associative learning
L8I0I4	PPT1_BOVINPalmitoyl- thioesterase 1 OS=Bos taurus OX=9913 GN=PPT1 PE=1 SV=1	P	GO:0008344	adult locomotory behavior
L8I0I4	PPT1_BOVINPalmitoyl- thioesterase 1 OS=Bos taurus OX=9913 GN=PPT1 PE=1 SV=1	P	GO:0015031	protein transport
L8I0I4	PPT1_BOVINPalmitoyl- thioesterase 1 OS=Bos taurus OX=9913 GN=PPT1 PE=1 SV=1	P	GO:0030149	sphingolipid catabolic process
L8I0I4	PPT1_BOVINPalmitoyl- thioesterase 1 OS=Bos taurus OX=9913 GN=PPT1 PE=1 SV=1	P	GO:0030308	negative regulation of cell growth
L8I0I4	PPT1_BOVINPalmitoyl- thioesterase 1 OS=Bos taurus OX=9913 GN=PPT1 PE=1 SV=1	P	GO:0031579	membrane raft organization
L8I0I4	PPT1_BOVINPalmitoyl- thioesterase 1 OS=Bos taurus OX=9913 GN=PPT1 PE=1 SV=1	P	GO:0032429	regulation of phospholipase A2 activity
L8I0I4	PPT1_BOVINPalmitoyl- thioesterase 1 OS=Bos taurus OX=9913 GN=PPT1 PE=1 SV=1	P	GO:0043524	negative regulation of neuron apoptotic process
L8I0I4	PPT1_BOVINPalmitoyl- thioesterase 1 OS=Bos taurus OX=9913 GN=PPT1 PE=1 SV=1	P	GO:0044257	cellular protein catabolic process
L8I0I4	PPT1_BOVINPalmitoyl- thioesterase 1 OS=Bos taurus OX=9913 GN=PPT1 PE=1 SV=1	P	GO:0046949	fatty-acyl-CoA biosynthetic process
L8I0I4	PPT1_BOVINPalmitoyl- thioesterase 1 OS=Bos taurus OX=9913 GN=PPT1 PE=1 SV=1	P	GO:0048167	regulation of synaptic plasticity
L8I0I4	PPT1_BOVINPalmitoyl- thioesterase 1 OS=Bos taurus OX=9913 GN=PPT1 PE=1 SV=1	P	GO:0048260	positive regulation of receptor-mediated endocytosis
L8I0I4	PPT1_BOVINPalmitoyl- thioesterase 1 OS=Bos taurus OX=9913 GN=PPT1 PE=1 SV=1	P	GO:0048549	positive regulation of pinocytosis
L8I0I4	PPT1_BOVINPalmitoyl- thioesterase 1 OS=Bos taurus OX=9913 GN=PPT1 PE=1 SV=1	P	GO:0048666	neuron development
L8I0I4	PPT1_BOVINPalmitoyl- thioesterase 1 OS=Bos taurus OX=9913 GN=PPT1 PE=1 SV=1	P	GO:0050803	regulation of synapse structure or activity
L8I0I4	PPT1_BOVINPalmitoyl- thioesterase 1 OS=Bos taurus OX=9913 GN=PPT1 PE=1 SV=1	P	GO:0050896	response to stimulus
L8I0I4	PPT1_BOVINPalmitoyl- thioesterase 1 OS=Bos taurus OX=9913 GN=PPT1 PE=1 SV=1	P	GO:0051181	cofactor transport
L8IIG2	FBLN1_HUMANFibulin-1 OS=Homo sapiens OX=9606 GN=FBLN1 PE=1 SV=4	C	GO:0005604	basement membrane
L8IIG2	FBLN1_HUMANFibulin-1 OS=Homo sapiens OX=9606 GN=FBLN1 PE=1 SV=4	C	GO:0005615	extracellular space
L8IIG2	FBLN1_HUMANFibulin-1 OS=Homo sapiens OX=9606 GN=FBLN1 PE=1 SV=4	C	GO:0071953	elastic fiber
L8IIG2	FBLN1_HUMANFibulin-1 OS=Homo sapiens OX=9606 GN=FBLN1 PE=1 SV=4	F	GO:0001968	fibronectin binding
L8IIG2	FBLN1_HUMANFibulin-1 OS=Homo sapiens OX=9606 GN=FBLN1 PE=1 SV=4	F	GO:0005178	integrin binding
L8IIG2	FBLN1_HUMANFibulin-1 OS=Homo sapiens OX=9606 GN=FBLN1 PE=1 SV=4	F	GO:0005201	extracellular matrix structural constituent
L8IIG2	FBLN1_HUMANFibulin-1 OS=Homo sapiens OX=9606 GN=FBLN1 PE=1 SV=4	F	GO:0005509	calcium ion binding
L8IIG2	FBLN1_HUMANFibulin-1 OS=Homo sapiens OX=9606 GN=FBLN1 PE=1 SV=4	F	GO:0008022	protein C-terminus binding
L8IIG2	FBLN1_HUMANFibulin-1 OS=Homo sapiens OX=9606 GN=FBLN1 PE=1 SV=4	F	GO:0016504	peptidase activator activity
L8IIG2	FBLN1_HUMANFibulin-1 OS=Homo sapiens OX=9606 GN=FBLN1 PE=1 SV=4	F	GO:0042802	identical protein binding
L8IIG2	FBLN1_HUMANFibulin-1 OS=Homo sapiens OX=9606 GN=FBLN1 PE=1 SV=4	F	GO:0070051	fibrinogen binding
L8IIG2	FBLN1_HUMANFibulin-1 OS=Homo sapiens OX=9606 GN=FBLN1 PE=1 SV=4	P	GO:0007229	integrin-mediated signaling pathway
L8IIG2	FBLN1_HUMANFibulin-1 OS=Homo sapiens OX=9606 GN=FBLN1 PE=1 SV=4	P	GO:0007566	embryo implantation
L8IIG2	FBLN1_HUMANFibulin-1 OS=Homo sapiens OX=9606 GN=FBLN1 PE=1 SV=4	P	GO:0010628	positive regulation of gene expression
L8IIG2	FBLN1_HUMANFibulin-1 OS=Homo sapiens OX=9606 GN=FBLN1 PE=1 SV=4	P	GO:0010952	positive regulation of peptidase activity
L8IIG2	FBLN1_HUMANFibulin-1 OS=Homo sapiens OX=9606 GN=FBLN1 PE=1 SV=4	P	GO:0030198	extracellular matrix organization
L8IIG2	FBLN1_HUMANFibulin-1 OS=Homo sapiens OX=9606 GN=FBLN1 PE=1 SV=4	P	GO:0048146	positive regulation of fibroblast proliferation
L8IIG2	FBLN1_HUMANFibulin-1 OS=Homo sapiens OX=9606 GN=FBLN1 PE=1 SV=4	P	GO:0070373	negative regulation of ERK1 and ERK2 cascade
L8IIG2	FBLN1_HUMANFibulin-1 OS=Homo sapiens OX=9606 GN=FBLN1 PE=1 SV=4	P	GO:0072378	blood coagulation, fibrin clot formation
L8IIG2	FBLN1_HUMANFibulin-1 OS=Homo sapiens OX=9606 GN=FBLN1 PE=1 SV=4	P	GO:1900025	negative regulation of substrate adhesion-dependent cell spreading
L8IIG2	FBLN1_HUMANFibulin-1 OS=Homo sapiens OX=9606 GN=FBLN1 PE=1 SV=4	P	GO:1904188	negative regulation of transformation of host cell by virus
L8IIG2	FBLN1_HUMANFibulin-1 OS=Homo sapiens OX=9606 GN=FBLN1 PE=1 SV=4	P	GO:1904237	positive regulation of substrate-dependent cell migration, cell attachment to substrate
L8IIG2	FBLN1_HUMANFibulin-1 OS=Homo sapiens OX=9606 GN=FBLN1 PE=1 SV=4	P	GO:2000146	negative regulation of cell motility
L8IIG2	FBLN1_HUMANFibulin-1 OS=Homo sapiens OX=9606 GN=FBLN1 PE=1 SV=4	P	GO:2000647	negative regulation of stem cell proliferation
L8IIG2	FBLN1_HUMANFibulin-1 OS=Homo sapiens OX=9606 GN=FBLN1 PE=1 SV=4	P	GO:2001202	negative regulation of transforming growth factor-beta secretion
L8IIG2	FBLN1_HUMANFibulin-1 OS=Homo sapiens OX=9606 GN=FBLN1 PE=1 SV=4	C	GO:0008305	integrin complex
L8IIG2	FBLN1_HUMANFibulin-1 OS=Homo sapiens OX=9606 GN=FBLN1 PE=1 SV=4	C	GO:0005578	extracellular matrix
L8HN01	UFSP1_MOUSEUfm1-specific protease 1 OS=Mus musculus OX=10090 GN=Ufsp1 PE=1 SV=1	C	GO:0005737	cytoplasm
L8HN01	UFSP1_MOUSEUfm1-specific protease 1 OS=Mus musculus OX=10090 GN=Ufsp1 PE=1 SV=1	C	GO:0043231	intracellular membrane-bounded organelle
L8HN01	UFSP1_MOUSEUfm1-specific protease 1 OS=Mus musculus OX=10090 GN=Ufsp1 PE=1 SV=1	F	GO:0016790	thiolester hydrolase activity
L8HN01	UFSP1_MOUSEUfm1-specific protease 1 OS=Mus musculus OX=10090 GN=Ufsp1 PE=1 SV=1	F	GO:0071567	UFM1 hydrolase activity
L8HN01	UFSP1_MOUSEUfm1-specific protease 1 OS=Mus musculus OX=10090 GN=Ufsp1 PE=1 SV=1	P	GO:0006508	proteolysis
L8ICN2	IMPCT_BOVIN IMPACT OS=Bos taurus OX=9913 GN=IMPACT PE=2 SV=2	C	GO:0005737	cytoplasm
L8ICN2	IMPCT_BOVIN IMPACT OS=Bos taurus OX=9913 GN=IMPACT PE=2 SV=2	C	GO:0005844	polysome
L8ICN2	IMPCT_BOVIN IMPACT OS=Bos taurus OX=9913 GN=IMPACT PE=2 SV=2	F	GO:0003779	actin binding
L8ICN2	IMPCT_BOVIN IMPACT OS=Bos taurus OX=9913 GN=IMPACT PE=2 SV=2	F	GO:0043022	ribosome binding
L8ICN2	IMPCT_BOVIN IMPACT OS=Bos taurus OX=9913 GN=IMPACT PE=2 SV=2	P	GO:0031333	negative regulation of protein complex assembly
L8ICN2	IMPCT_BOVIN IMPACT OS=Bos taurus OX=9913 GN=IMPACT PE=2 SV=2	P	GO:0031953	negative regulation of protein autophosphorylation
L8ICN2	IMPCT_BOVIN IMPACT OS=Bos taurus OX=9913 GN=IMPACT PE=2 SV=2	P	GO:0042149	cellular response to glucose starvation
L8ICN2	IMPCT_BOVIN IMPACT OS=Bos taurus OX=9913 GN=IMPACT PE=2 SV=2	P	GO:0045666	positive regulation of neuron differentiation
L8ICN2	IMPCT_BOVIN IMPACT OS=Bos taurus OX=9913 GN=IMPACT PE=2 SV=2	P	GO:0060548	negative regulation of cell death
L8ICN2	IMPCT_BOVIN IMPACT OS=Bos taurus OX=9913 GN=IMPACT PE=2 SV=2	P	GO:0060733	regulation of eIF2 alpha phosphorylation by amino acid starvation
L8ICN2	IMPCT_BOVIN IMPACT OS=Bos taurus OX=9913 GN=IMPACT PE=2 SV=2	P	GO:0070301	cellular response to hydrogen peroxide
L8ICN2	IMPCT_BOVIN IMPACT OS=Bos taurus OX=9913 GN=IMPACT PE=2 SV=2	P	GO:0071264	positive regulation of translational initiation in response to starvation
L8ICN2	IMPCT_BOVIN IMPACT OS=Bos taurus OX=9913 GN=IMPACT PE=2 SV=2	P	GO:0071468	cellular response to acidic pH
L8ICN2	IMPCT_BOVIN IMPACT OS=Bos taurus OX=9913 GN=IMPACT PE=2 SV=2	P	GO:0071494	cellular response to UV-C
L8ICN2	IMPCT_BOVIN IMPACT OS=Bos taurus OX=9913 GN=IMPACT PE=2 SV=2	P	GO:0072755	cellular response to benomyl
L8ICN2	IMPCT_BOVIN IMPACT OS=Bos taurus OX=9913 GN=IMPACT PE=2 SV=2	P	GO:0097201	negative regulation of transcription from RNA polymerase II promoter in response to stress
L8ICN2	IMPCT_BOVIN IMPACT OS=Bos taurus OX=9913 GN=IMPACT PE=2 SV=2	P	GO:1990138	neuron projection extension
L8ICN2	IMPCT_BOVIN IMPACT OS=Bos taurus OX=9913 GN=IMPACT PE=2 SV=2	P	GO:1990253	cellular response to leucine starvation
L8HV64	PFKAL_BOVINATP-dependent 6- liver type OS=Bos taurus OX=9913 GN=PFKL PE=2 SV=1	C	GO:0005576	extracellular region
L8HV64	PFKAL_BOVINATP-dependent 6- liver type OS=Bos taurus OX=9913 GN=PFKL PE=2 SV=1	C	GO:0005634	nucleus
L8HV64	PFKAL_BOVINATP-dependent 6- liver type OS=Bos taurus OX=9913 GN=PFKL PE=2 SV=1	C	GO:0005945	6-phosphofructokinase complex
L8HV64	PFKAL_BOVINATP-dependent 6- liver type OS=Bos taurus OX=9913 GN=PFKL PE=2 SV=1	C	GO:0016324	apical plasma membrane
L8HV64	PFKAL_BOVINATP-dependent 6- liver type OS=Bos taurus OX=9913 GN=PFKL PE=2 SV=1	C	GO:0097228	sperm principal piece
L8HV64	PFKAL_BOVINATP-dependent 6- liver type OS=Bos taurus OX=9913 GN=PFKL PE=2 SV=1	F	GO:0003872	6-phosphofructokinase activity
L8HV64	PFKAL_BOVINATP-dependent 6- liver type OS=Bos taurus OX=9913 GN=PFKL PE=2 SV=1	F	GO:0004331	fructose-2,6-bisphosphate 2-phosphatase activity
L8HV64	PFKAL_BOVINATP-dependent 6- liver type OS=Bos taurus OX=9913 GN=PFKL PE=2 SV=1	F	GO:0005524	ATP binding
L8HV64	PFKAL_BOVINATP-dependent 6- liver type OS=Bos taurus OX=9913 GN=PFKL PE=2 SV=1	F	GO:0008022	protein C-terminus binding
L8HV64	PFKAL_BOVINATP-dependent 6- liver type OS=Bos taurus OX=9913 GN=PFKL PE=2 SV=1	F	GO:0016208	AMP binding
L8HV64	PFKAL_BOVINATP-dependent 6- liver type OS=Bos taurus OX=9913 GN=PFKL PE=2 SV=1	F	GO:0019900	kinase binding
L8HV64	PFKAL_BOVINATP-dependent 6- liver type OS=Bos taurus OX=9913 GN=PFKL PE=2 SV=1	F	GO:0042803	protein homodimerization activity
L8HV64	PFKAL_BOVINATP-dependent 6- liver type OS=Bos taurus OX=9913 GN=PFKL PE=2 SV=1	F	GO:0046872	metal ion binding
L8HV64	PFKAL_BOVINATP-dependent 6- liver type OS=Bos taurus OX=9913 GN=PFKL PE=2 SV=1	F	GO:0070061	fructose binding
L8HV64	PFKAL_BOVINATP-dependent 6- liver type OS=Bos taurus OX=9913 GN=PFKL PE=2 SV=1	F	GO:0070095	fructose-6-phosphate binding
L8HV64	PFKAL_BOVINATP-dependent 6- liver type OS=Bos taurus OX=9913 GN=PFKL PE=2 SV=1	P	GO:0005980	glycogen catabolic process
L8HV64	PFKAL_BOVINATP-dependent 6- liver type OS=Bos taurus OX=9913 GN=PFKL PE=2 SV=1	P	GO:0006002	fructose 6-phosphate metabolic process
L8HV64	PFKAL_BOVINATP-dependent 6- liver type OS=Bos taurus OX=9913 GN=PFKL PE=2 SV=1	P	GO:0009749	response to glucose
L8HV64	PFKAL_BOVINATP-dependent 6- liver type OS=Bos taurus OX=9913 GN=PFKL PE=2 SV=1	P	GO:0016311	dephosphorylation
L8HV64	PFKAL_BOVINATP-dependent 6- liver type OS=Bos taurus OX=9913 GN=PFKL PE=2 SV=1	P	GO:0030388	fructose 1,6-bisphosphate metabolic process
L8HV64	PFKAL_BOVINATP-dependent 6- liver type OS=Bos taurus OX=9913 GN=PFKL PE=2 SV=1	P	GO:0032024	positive regulation of insulin secretion
L8HV64	PFKAL_BOVINATP-dependent 6- liver type OS=Bos taurus OX=9913 GN=PFKL PE=2 SV=1	P	GO:0042593	glucose homeostasis
L8HV64	PFKAL_BOVINATP-dependent 6- liver type OS=Bos taurus OX=9913 GN=PFKL PE=2 SV=1	P	GO:0045944	positive regulation of transcription by RNA polymerase II
L8HV64	PFKAL_BOVINATP-dependent 6- liver type OS=Bos taurus OX=9913 GN=PFKL PE=2 SV=1	P	GO:0046676	negative regulation of insulin secretion
L8HV64	PFKAL_BOVINATP-dependent 6- liver type OS=Bos taurus OX=9913 GN=PFKL PE=2 SV=1	P	GO:0046716	muscle cell cellular homeostasis
L8HV64	PFKAL_BOVINATP-dependent 6- liver type OS=Bos taurus OX=9913 GN=PFKL PE=2 SV=1	P	GO:0046835	carbohydrate phosphorylation
L8HV64	PFKAL_BOVINATP-dependent 6- liver type OS=Bos taurus OX=9913 GN=PFKL PE=2 SV=1	P	GO:0051289	protein homotetramerization
L8HV64	PFKAL_BOVINATP-dependent 6- liver type OS=Bos taurus OX=9913 GN=PFKL PE=2 SV=1	P	GO:0061621	canonical glycolysis
L8HV64	PFKAL_BOVINATP-dependent 6- liver type OS=Bos taurus OX=9913 GN=PFKL PE=2 SV=1	P	GO:0093001	glycolysis from storage polysaccharide through glucose-1-phosphate
L8HV64	PFKAL_BOVINATP-dependent 6- liver type OS=Bos taurus OX=9913 GN=PFKL PE=2 SV=1	P	GO:0006000	fructose metabolic process
L8HV64	PFKAL_BOVINATP-dependent 6- liver type OS=Bos taurus OX=9913 GN=PFKL PE=2 SV=1	P	GO:0006012	galactose metabolic process
L8HV64	PFKAL_BOVINATP-dependent 6- liver type OS=Bos taurus OX=9913 GN=PFKL PE=2 SV=1	P	GO:0006013	mannose metabolic process
L8HV64	PFKAL_BOVINATP-dependent 6- liver type OS=Bos taurus OX=9913 GN=PFKL PE=2 SV=1	P	GO:0006094	gluconeogenesis
L8HV64	PFKAL_BOVINATP-dependent 6- liver type OS=Bos taurus OX=9913 GN=PFKL PE=2 SV=1	P	GO:0006098	pentose-phosphate shunt
L8I798	FIBA_HUMANFibrinogen alpha chain OS=Homo sapiens OX=9606 GN=FGA PE=1 SV=2	C	GO:0005577	fibrinogen complex
L8I798	FIBA_HUMANFibrinogen alpha chain OS=Homo sapiens OX=9606 GN=FGA PE=1 SV=2	C	GO:0005788	endoplasmic reticulum lumen
L8I798	FIBA_HUMANFibrinogen alpha chain OS=Homo sapiens OX=9606 GN=FGA PE=1 SV=2	C	GO:0005791	rough endoplasmic reticulum
L8I798	FIBA_HUMANFibrinogen alpha chain OS=Homo sapiens OX=9606 GN=FGA PE=1 SV=2	C	GO:0005938	cell cortex
L8I798	FIBA_HUMANFibrinogen alpha chain OS=Homo sapiens OX=9606 GN=FGA PE=1 SV=2	C	GO:0009897	external side of plasma membrane
L8I798	FIBA_HUMANFibrinogen alpha chain OS=Homo sapiens OX=9606 GN=FGA PE=1 SV=2	C	GO:0031091	platelet alpha granule
L8I798	FIBA_HUMANFibrinogen alpha chain OS=Homo sapiens OX=9606 GN=FGA PE=1 SV=2	C	GO:0045202	synapse
L8I798	FIBA_HUMANFibrinogen alpha chain OS=Homo sapiens OX=9606 GN=FGA PE=1 SV=2	C	GO:0072562	blood microparticle
L8I798	FIBA_HUMANFibrinogen alpha chain OS=Homo sapiens OX=9606 GN=FGA PE=1 SV=2	F	GO:0005102	signaling receptor binding
L8I798	FIBA_HUMANFibrinogen alpha chain OS=Homo sapiens OX=9606 GN=FGA PE=1 SV=2	F	GO:0005201	extracellular matrix structural constituent
L8I798	FIBA_HUMANFibrinogen alpha chain OS=Homo sapiens OX=9606 GN=FGA PE=1 SV=2	F	GO:0050839	cell adhesion molecule binding
L8I798	FIBA_HUMANFibrinogen alpha chain OS=Homo sapiens OX=9606 GN=FGA PE=1 SV=2	P	GO:0002250	adaptive immune response
L8I798	FIBA_HUMANFibrinogen alpha chain OS=Homo sapiens OX=9606 GN=FGA PE=1 SV=2	P	GO:0006953	acute-phase response
L8I798	FIBA_HUMANFibrinogen alpha chain OS=Homo sapiens OX=9606 GN=FGA PE=1 SV=2	P	GO:0007160	cell-matrix adhesion
L8I798	FIBA_HUMANFibrinogen alpha chain OS=Homo sapiens OX=9606 GN=FGA PE=1 SV=2	P	GO:0010165	response to X-ray
L8I798	FIBA_HUMANFibrinogen alpha chain OS=Homo sapiens OX=9606 GN=FGA PE=1 SV=2	P	GO:0014911	positive regulation of smooth muscle cell migration
L8I798	FIBA_HUMANFibrinogen alpha chain OS=Homo sapiens OX=9606 GN=FGA PE=1 SV=2	P	GO:0031639	plasminogen activation
L8I798	FIBA_HUMANFibrinogen alpha chain OS=Homo sapiens OX=9606 GN=FGA PE=1 SV=2	P	GO:0032355	response to estradiol
L8I798	FIBA_HUMANFibrinogen alpha chain OS=Homo sapiens OX=9606 GN=FGA PE=1 SV=2	P	GO:0032868	response to insulin
L8I798	FIBA_HUMANFibrinogen alpha chain OS=Homo sapiens OX=9606 GN=FGA PE=1 SV=2	P	GO:0033595	response to genistein
L8I798	FIBA_HUMANFibrinogen alpha chain OS=Homo sapiens OX=9606 GN=FGA PE=1 SV=2	P	GO:0034116	positive regulation of heterotypic cell-cell adhesion
L8I798	FIBA_HUMANFibrinogen alpha chain OS=Homo sapiens OX=9606 GN=FGA PE=1 SV=2	P	GO:0042730	fibrinolysis
L8I798	FIBA_HUMANFibrinogen alpha chain OS=Homo sapiens OX=9606 GN=FGA PE=1 SV=2	P	GO:0043152	induction of bacterial agglutination
L8I798	FIBA_HUMANFibrinogen alpha chain OS=Homo sapiens OX=9606 GN=FGA PE=1 SV=2	P	GO:0043278	response to morphine
L8I798	FIBA_HUMANFibrinogen alpha chain OS=Homo sapiens OX=9606 GN=FGA PE=1 SV=2	P	GO:0044320	cellular response to leptin stimulus
L8I798	FIBA_HUMANFibrinogen alpha chain OS=Homo sapiens OX=9606 GN=FGA PE=1 SV=2	P	GO:0044468	envenomation resulting in modulation of blood coagulation in other organism
L8I798	FIBA_HUMANFibrinogen alpha chain OS=Homo sapiens OX=9606 GN=FGA PE=1 SV=2	P	GO:0045087	innate immune response
L8I798	FIBA_HUMANFibrinogen alpha chain OS=Homo sapiens OX=9606 GN=FGA PE=1 SV=2	P	GO:0045907	positive regulation of vasoconstriction
L8I798	FIBA_HUMANFibrinogen alpha chain OS=Homo sapiens OX=9606 GN=FGA PE=1 SV=2	P	GO:0045921	positive regulation of exocytosis
L8I798	FIBA_HUMANFibrinogen alpha chain OS=Homo sapiens OX=9606 GN=FGA PE=1 SV=2	P	GO:0046898	response to cycloheximide
L8I798	FIBA_HUMANFibrinogen alpha chain OS=Homo sapiens OX=9606 GN=FGA PE=1 SV=2	P	GO:0050714	positive regulation of protein secretion
L8I798	FIBA_HUMANFibrinogen alpha chain OS=Homo sapiens OX=9606 GN=FGA PE=1 SV=2	P	GO:0051258	protein polymerization
L8I798	FIBA_HUMANFibrinogen alpha chain OS=Homo sapiens OX=9606 GN=FGA PE=1 SV=2	P	GO:0051592	response to calcium ion
L8I798	FIBA_HUMANFibrinogen alpha chain OS=Homo sapiens OX=9606 GN=FGA PE=1 SV=2	P	GO:0060416	response to growth hormone
L8I798	FIBA_HUMANFibrinogen alpha chain OS=Homo sapiens OX=9606 GN=FGA PE=1 SV=2	P	GO:0070374	positive regulation of ERK1 and ERK2 cascade
L8I798	FIBA_HUMANFibrinogen alpha chain OS=Homo sapiens OX=9606 GN=FGA PE=1 SV=2	P	GO:0070527	platelet aggregation
L8I798	FIBA_HUMANFibrinogen alpha chain OS=Homo sapiens OX=9606 GN=FGA PE=1 SV=2	P	GO:0071347	cellular response to interleukin-1
L8I798	FIBA_HUMANFibrinogen alpha chain OS=Homo sapiens OX=9606 GN=FGA PE=1 SV=2	P	GO:0071354	cellular response to interleukin-6
L8I798	FIBA_HUMANFibrinogen alpha chain OS=Homo sapiens OX=9606 GN=FGA PE=1 SV=2	P	GO:0071407	cellular response to organic cyclic compound
L8I798	FIBA_HUMANFibrinogen alpha chain OS=Homo sapiens OX=9606 GN=FGA PE=1 SV=2	P	GO:0072377	blood coagulation, common pathway
L8I798	FIBA_HUMANFibrinogen alpha chain OS=Homo sapiens OX=9606 GN=FGA PE=1 SV=2	P	GO:0072574	hepatocyte proliferation
L8I798	FIBA_HUMANFibrinogen alpha chain OS=Homo sapiens OX=9606 GN=FGA PE=1 SV=2	P	GO:0090277	positive regulation of peptide hormone secretion
L8I798	FIBA_HUMANFibrinogen alpha chain OS=Homo sapiens OX=9606 GN=FGA PE=1 SV=2	P	GO:0097066	response to thyroid hormone
L8I798	FIBA_HUMANFibrinogen alpha chain OS=Homo sapiens OX=9606 GN=FGA PE=1 SV=2	P	GO:0097421	liver regeneration
L8I798	FIBA_HUMANFibrinogen alpha chain OS=Homo sapiens OX=9606 GN=FGA PE=1 SV=2	P	GO:1902042	negative regulation of extrinsic apoptotic signaling pathway via death domain receptors
L8I798	FIBA_HUMANFibrinogen alpha chain OS=Homo sapiens OX=9606 GN=FGA PE=1 SV=2	P	GO:1990643	cellular response to granulocyte colony-stimulating factor
L8I798	FIBA_HUMANFibrinogen alpha chain OS=Homo sapiens OX=9606 GN=FGA PE=1 SV=2	P	GO:2000352	negative regulation of endothelial cell apoptotic process
L8I798	FIBA_HUMANFibrinogen alpha chain OS=Homo sapiens OX=9606 GN=FGA PE=1 SV=2	C	GO:0005578	extracellular matrix
L8HZ66	PGK2_HORSEPhosphoglycerate kinase 2 OS=Equus caballus OX=9796 GN=PGK2 PE=3 SV=3	C	GO:0005615	extracellular space
L8HZ66	PGK2_HORSEPhosphoglycerate kinase 2 OS=Equus caballus OX=9796 GN=PGK2 PE=3 SV=3	C	GO:0005829	cytosol
L8HZ66	PGK2_HORSEPhosphoglycerate kinase 2 OS=Equus caballus OX=9796 GN=PGK2 PE=3 SV=3	C	GO:0035686	sperm fibrous sheath
L8HZ66	PGK2_HORSEPhosphoglycerate kinase 2 OS=Equus caballus OX=9796 GN=PGK2 PE=3 SV=3	C	GO:0045121	membrane raft
L8HZ66	PGK2_HORSEPhosphoglycerate kinase 2 OS=Equus caballus OX=9796 GN=PGK2 PE=3 SV=3	F	GO:0004618	phosphoglycerate kinase activity
L8HZ66	PGK2_HORSEPhosphoglycerate kinase 2 OS=Equus caballus OX=9796 GN=PGK2 PE=3 SV=3	F	GO:0005524	ATP binding
L8HZ66	PGK2_HORSEPhosphoglycerate kinase 2 OS=Equus caballus OX=9796 GN=PGK2 PE=3 SV=3	F	GO:0043531	ADP binding
L8HZ66	PGK2_HORSEPhosphoglycerate kinase 2 OS=Equus caballus OX=9796 GN=PGK2 PE=3 SV=3	F	GO:0047134	protein-disulfide reductase activity
L8HZ66	PGK2_HORSEPhosphoglycerate kinase 2 OS=Equus caballus OX=9796 GN=PGK2 PE=3 SV=3	P	GO:0006094	gluconeogenesis
L8HZ66	PGK2_HORSEPhosphoglycerate kinase 2 OS=Equus caballus OX=9796 GN=PGK2 PE=3 SV=3	P	GO:0006096	glycolytic process
L8HZ66	PGK2_HORSEPhosphoglycerate kinase 2 OS=Equus caballus OX=9796 GN=PGK2 PE=3 SV=3	P	GO:0016525	negative regulation of angiogenesis
L8HZ66	PGK2_HORSEPhosphoglycerate kinase 2 OS=Equus caballus OX=9796 GN=PGK2 PE=3 SV=3	P	GO:0030317	flagellated sperm motility
L8HZ66	PGK2_HORSEPhosphoglycerate kinase 2 OS=Equus caballus OX=9796 GN=PGK2 PE=3 SV=3	P	GO:0030855	epithelial cell differentiation
L8HZ66	PGK2_HORSEPhosphoglycerate kinase 2 OS=Equus caballus OX=9796 GN=PGK2 PE=3 SV=3	P	GO:0031639	plasminogen activation
L8HZ66	PGK2_HORSEPhosphoglycerate kinase 2 OS=Equus caballus OX=9796 GN=PGK2 PE=3 SV=3	P	GO:0055114	oxidation-reduction process
L8HZ66	PGK2_HORSEPhosphoglycerate kinase 2 OS=Equus caballus OX=9796 GN=PGK2 PE=3 SV=3	P	GO:0071456	cellular response to hypoxia
L8HZ66	PGK2_HORSEPhosphoglycerate kinase 2 OS=Equus caballus OX=9796 GN=PGK2 PE=3 SV=3	P	GO:1903862	positive regulation of oxidative phosphorylation
L8HZ66	PGK2_HORSEPhosphoglycerate kinase 2 OS=Equus caballus OX=9796 GN=PGK2 PE=3 SV=3	P	GO:0015976	carbon utilization
L8J4V3	LMNB1_HUMANLamin-B1 OS=Homo sapiens OX=9606 GN=LMNB1 PE=1 SV=2	C	GO:0005637	nuclear inner membrane
L8J4V3	LMNB1_HUMANLamin-B1 OS=Homo sapiens OX=9606 GN=LMNB1 PE=1 SV=2	C	GO:0005638	lamin filament
L8J4V3	LMNB1_HUMANLamin-B1 OS=Homo sapiens OX=9606 GN=LMNB1 PE=1 SV=2	C	GO:0005654	nucleoplasm
L8J4V3	LMNB1_HUMANLamin-B1 OS=Homo sapiens OX=9606 GN=LMNB1 PE=1 SV=2	C	GO:0005829	cytosol
L8J4V3	LMNB1_HUMANLamin-B1 OS=Homo sapiens OX=9606 GN=LMNB1 PE=1 SV=2	C	GO:0005886	plasma membrane
L8J4V3	LMNB1_HUMANLamin-B1 OS=Homo sapiens OX=9606 GN=LMNB1 PE=1 SV=2	C	GO:0014704	intercalated disc
L8J4V3	LMNB1_HUMANLamin-B1 OS=Homo sapiens OX=9606 GN=LMNB1 PE=1 SV=2	C	GO:0016363	nuclear matrix
L8J4V3	LMNB1_HUMANLamin-B1 OS=Homo sapiens OX=9606 GN=LMNB1 PE=1 SV=2	C	GO:0030016	myofibril
L8J4V3	LMNB1_HUMANLamin-B1 OS=Homo sapiens OX=9606 GN=LMNB1 PE=1 SV=2	C	GO:0048471	perinuclear region of cytoplasm
L8J4V3	LMNB1_HUMANLamin-B1 OS=Homo sapiens OX=9606 GN=LMNB1 PE=1 SV=2	F	GO:0005198	structural molecule activity
L8J4V3	LMNB1_HUMANLamin-B1 OS=Homo sapiens OX=9606 GN=LMNB1 PE=1 SV=2	F	GO:0008157	protein phosphatase 1 binding
L8J4V3	LMNB1_HUMANLamin-B1 OS=Homo sapiens OX=9606 GN=LMNB1 PE=1 SV=2	F	GO:0008432	JUN kinase binding
L8J4V3	LMNB1_HUMANLamin-B1 OS=Homo sapiens OX=9606 GN=LMNB1 PE=1 SV=2	F	GO:0042802	identical protein binding
L8J4V3	LMNB1_HUMANLamin-B1 OS=Homo sapiens OX=9606 GN=LMNB1 PE=1 SV=2	F	GO:0043274	phospholipase binding
L8J4V3	LMNB1_HUMANLamin-B1 OS=Homo sapiens OX=9606 GN=LMNB1 PE=1 SV=2	F	GO:1990837	sequence-specific double-stranded DNA binding
L8J4V3	LMNB1_HUMANLamin-B1 OS=Homo sapiens OX=9606 GN=LMNB1 PE=1 SV=2	P	GO:0006606	protein import into nucleus
L8J4V3	LMNB1_HUMANLamin-B1 OS=Homo sapiens OX=9606 GN=LMNB1 PE=1 SV=2	P	GO:0006998	nuclear envelope organization
L8J4V3	LMNB1_HUMANLamin-B1 OS=Homo sapiens OX=9606 GN=LMNB1 PE=1 SV=2	P	GO:0007283	spermatogenesis
L8J4V3	LMNB1_HUMANLamin-B1 OS=Homo sapiens OX=9606 GN=LMNB1 PE=1 SV=2	P	GO:0007517	muscle organ development
L8J4V3	LMNB1_HUMANLamin-B1 OS=Homo sapiens OX=9606 GN=LMNB1 PE=1 SV=2	P	GO:0009612	response to mechanical stimulus
L8J4V3	LMNB1_HUMANLamin-B1 OS=Homo sapiens OX=9606 GN=LMNB1 PE=1 SV=2	P	GO:0010628	positive regulation of gene expression
L8J4V3	LMNB1_HUMANLamin-B1 OS=Homo sapiens OX=9606 GN=LMNB1 PE=1 SV=2	P	GO:0010971	positive regulation of G2/M transition of mitotic cell cycle
L8J4V3	LMNB1_HUMANLamin-B1 OS=Homo sapiens OX=9606 GN=LMNB1 PE=1 SV=2	P	GO:0022008	neurogenesis
L8J4V3	LMNB1_HUMANLamin-B1 OS=Homo sapiens OX=9606 GN=LMNB1 PE=1 SV=2	P	GO:0030010	establishment of cell polarity
L8J4V3	LMNB1_HUMANLamin-B1 OS=Homo sapiens OX=9606 GN=LMNB1 PE=1 SV=2	P	GO:0030334	regulation of cell migration
L8J4V3	LMNB1_HUMANLamin-B1 OS=Homo sapiens OX=9606 GN=LMNB1 PE=1 SV=2	P	GO:0030951	establishment or maintenance of microtubule cytoskeleton polarity
L8J4V3	LMNB1_HUMANLamin-B1 OS=Homo sapiens OX=9606 GN=LMNB1 PE=1 SV=2	P	GO:0031647	regulation of protein stability
L8J4V3	LMNB1_HUMANLamin-B1 OS=Homo sapiens OX=9606 GN=LMNB1 PE=1 SV=2	P	GO:0032204	regulation of telomere maintenance
L8J4V3	LMNB1_HUMANLamin-B1 OS=Homo sapiens OX=9606 GN=LMNB1 PE=1 SV=2	P	GO:0035722	interleukin-12-mediated signaling pathway
L8J4V3	LMNB1_HUMANLamin-B1 OS=Homo sapiens OX=9606 GN=LMNB1 PE=1 SV=2	P	GO:0042493	response to drug
L8J4V3	LMNB1_HUMANLamin-B1 OS=Homo sapiens OX=9606 GN=LMNB1 PE=1 SV=2	P	GO:0045669	positive regulation of osteoblast differentiation
L8J4V3	LMNB1_HUMANLamin-B1 OS=Homo sapiens OX=9606 GN=LMNB1 PE=1 SV=2	P	GO:0046330	positive regulation of JNK cascade
L8J4V3	LMNB1_HUMANLamin-B1 OS=Homo sapiens OX=9606 GN=LMNB1 PE=1 SV=2	P	GO:0046677	response to antibiotic
L8J4V3	LMNB1_HUMANLamin-B1 OS=Homo sapiens OX=9606 GN=LMNB1 PE=1 SV=2	P	GO:0055015	ventricular cardiac muscle cell development
L8J4V3	LMNB1_HUMANLamin-B1 OS=Homo sapiens OX=9606 GN=LMNB1 PE=1 SV=2	P	GO:0071386	cellular response to corticosterone stimulus
L8J4V3	LMNB1_HUMANLamin-B1 OS=Homo sapiens OX=9606 GN=LMNB1 PE=1 SV=2	P	GO:0071456	cellular response to hypoxia
L8J4V3	LMNB1_HUMANLamin-B1 OS=Homo sapiens OX=9606 GN=LMNB1 PE=1 SV=2	P	GO:0072201	negative regulation of mesenchymal cell proliferation
L8J4V3	LMNB1_HUMANLamin-B1 OS=Homo sapiens OX=9606 GN=LMNB1 PE=1 SV=2	P	GO:0090201	negative regulation of release of cytochrome c from mitochondria
L8J4V3	LMNB1_HUMANLamin-B1 OS=Homo sapiens OX=9606 GN=LMNB1 PE=1 SV=2	P	GO:0090343	positive regulation of cell aging
L8J4V3	LMNB1_HUMANLamin-B1 OS=Homo sapiens OX=9606 GN=LMNB1 PE=1 SV=2	P	GO:0090398	cellular senescence
L8J4V3	LMNB1_HUMANLamin-B1 OS=Homo sapiens OX=9606 GN=LMNB1 PE=1 SV=2	P	GO:1900114	positive regulation of histone H3-K9 trimethylation
L8J4V3	LMNB1_HUMANLamin-B1 OS=Homo sapiens OX=9606 GN=LMNB1 PE=1 SV=2	P	GO:1900180	regulation of protein localization to nucleus
L8J4V3	LMNB1_HUMANLamin-B1 OS=Homo sapiens OX=9606 GN=LMNB1 PE=1 SV=2	P	GO:1903243	negative regulation of cardiac muscle hypertrophy in response to stress
L8J4V3	LMNB1_HUMANLamin-B1 OS=Homo sapiens OX=9606 GN=LMNB1 PE=1 SV=2	P	GO:1904178	negative regulation of adipose tissue development
L8J4V3	LMNB1_HUMANLamin-B1 OS=Homo sapiens OX=9606 GN=LMNB1 PE=1 SV=2	P	GO:1904609	cellular response to monosodium L-glutamate
L8J4V3	LMNB1_HUMANLamin-B1 OS=Homo sapiens OX=9606 GN=LMNB1 PE=1 SV=2	P	GO:2001237	negative regulation of extrinsic apoptotic signaling pathway
L8HXM6	MIPT3_HUMANTRAF3-interacting 1 OS=Homo sapiens OX=9606 GN=TRAF3IP1 PE=1 SV=1	C	GO:0005813	centrosome
L8HXM6	MIPT3_HUMANTRAF3-interacting 1 OS=Homo sapiens OX=9606 GN=TRAF3IP1 PE=1 SV=1	C	GO:0005829	cytosol
L8HXM6	MIPT3_HUMANTRAF3-interacting 1 OS=Homo sapiens OX=9606 GN=TRAF3IP1 PE=1 SV=1	C	GO:0005930	axoneme
L8HXM6	MIPT3_HUMANTRAF3-interacting 1 OS=Homo sapiens OX=9606 GN=TRAF3IP1 PE=1 SV=1	C	GO:0030992	intraciliary transport particle B
L8HXM6	MIPT3_HUMANTRAF3-interacting 1 OS=Homo sapiens OX=9606 GN=TRAF3IP1 PE=1 SV=1	C	GO:0035869	ciliary transition zone
L8HXM6	MIPT3_HUMANTRAF3-interacting 1 OS=Homo sapiens OX=9606 GN=TRAF3IP1 PE=1 SV=1	C	GO:0036064	ciliary basal body
L8HXM6	MIPT3_HUMANTRAF3-interacting 1 OS=Homo sapiens OX=9606 GN=TRAF3IP1 PE=1 SV=1	C	GO:0097542	ciliary tip
L8HXM6	MIPT3_HUMANTRAF3-interacting 1 OS=Homo sapiens OX=9606 GN=TRAF3IP1 PE=1 SV=1	C	GO:0097546	ciliary base
L8HXM6	MIPT3_HUMANTRAF3-interacting 1 OS=Homo sapiens OX=9606 GN=TRAF3IP1 PE=1 SV=1	F	GO:0005102	signaling receptor binding
L8HXM6	MIPT3_HUMANTRAF3-interacting 1 OS=Homo sapiens OX=9606 GN=TRAF3IP1 PE=1 SV=1	F	GO:0008017	microtubule binding
L8HXM6	MIPT3_HUMANTRAF3-interacting 1 OS=Homo sapiens OX=9606 GN=TRAF3IP1 PE=1 SV=1	P	GO:0000122	negative regulation of transcription by RNA polymerase II
L8HXM6	MIPT3_HUMANTRAF3-interacting 1 OS=Homo sapiens OX=9606 GN=TRAF3IP1 PE=1 SV=1	P	GO:0001738	morphogenesis of a polarized epithelium
L8HXM6	MIPT3_HUMANTRAF3-interacting 1 OS=Homo sapiens OX=9606 GN=TRAF3IP1 PE=1 SV=1	P	GO:0001822	kidney development
L8HXM6	MIPT3_HUMANTRAF3-interacting 1 OS=Homo sapiens OX=9606 GN=TRAF3IP1 PE=1 SV=1	P	GO:0031076	embryonic camera-type eye development
L8HXM6	MIPT3_HUMANTRAF3-interacting 1 OS=Homo sapiens OX=9606 GN=TRAF3IP1 PE=1 SV=1	P	GO:0031333	negative regulation of protein complex assembly
L8HXM6	MIPT3_HUMANTRAF3-interacting 1 OS=Homo sapiens OX=9606 GN=TRAF3IP1 PE=1 SV=1	P	GO:0032688	negative regulation of interferon-beta production
L8HXM6	MIPT3_HUMANTRAF3-interacting 1 OS=Homo sapiens OX=9606 GN=TRAF3IP1 PE=1 SV=1	P	GO:0035050	embryonic heart tube development
L8HXM6	MIPT3_HUMANTRAF3-interacting 1 OS=Homo sapiens OX=9606 GN=TRAF3IP1 PE=1 SV=1	P	GO:0035735	intraciliary transport involved in cilium assembly
L8HXM6	MIPT3_HUMANTRAF3-interacting 1 OS=Homo sapiens OX=9606 GN=TRAF3IP1 PE=1 SV=1	P	GO:0036342	post-anal tail morphogenesis
L8HXM6	MIPT3_HUMANTRAF3-interacting 1 OS=Homo sapiens OX=9606 GN=TRAF3IP1 PE=1 SV=1	P	GO:0042532	negative regulation of tyrosine phosphorylation of STAT protein
L8HXM6	MIPT3_HUMANTRAF3-interacting 1 OS=Homo sapiens OX=9606 GN=TRAF3IP1 PE=1 SV=1	P	GO:0042733	embryonic digit morphogenesis
L8HXM6	MIPT3_HUMANTRAF3-interacting 1 OS=Homo sapiens OX=9606 GN=TRAF3IP1 PE=1 SV=1	P	GO:0050687	negative regulation of defense response to virus
L8HXM6	MIPT3_HUMANTRAF3-interacting 1 OS=Homo sapiens OX=9606 GN=TRAF3IP1 PE=1 SV=1	P	GO:0051101	regulation of DNA binding
L8HXM6	MIPT3_HUMANTRAF3-interacting 1 OS=Homo sapiens OX=9606 GN=TRAF3IP1 PE=1 SV=1	P	GO:0070507	regulation of microtubule cytoskeleton organization
L8HXM6	MIPT3_HUMANTRAF3-interacting 1 OS=Homo sapiens OX=9606 GN=TRAF3IP1 PE=1 SV=1	P	GO:1901621	negative regulation of smoothened signaling pathway involved in dorsal/ventral neural tube patterning
L8HXM6	MIPT3_HUMANTRAF3-interacting 1 OS=Homo sapiens OX=9606 GN=TRAF3IP1 PE=1 SV=1	C	GO:0045298	tubulin complex
L8I2P8	PLBL2_BOVIN phospholipase B-like 2 OS=Bos taurus OX=9913 GN=PLBD2 PE=2 SV=1	C	GO:0005615	extracellular space
L8I2P8	PLBL2_BOVIN phospholipase B-like 2 OS=Bos taurus OX=9913 GN=PLBD2 PE=2 SV=1	C	GO:0043202	lysosomal lumen
L8I2P8	PLBL2_BOVIN phospholipase B-like 2 OS=Bos taurus OX=9913 GN=PLBD2 PE=2 SV=1	F	GO:0004620	phospholipase activity
L8I2P8	PLBL2_BOVIN phospholipase B-like 2 OS=Bos taurus OX=9913 GN=PLBD2 PE=2 SV=1	P	GO:0006650	glycerophospholipid metabolic process
L8I2P8	PLBL2_BOVIN phospholipase B-like 2 OS=Bos taurus OX=9913 GN=PLBD2 PE=2 SV=1	P	GO:0009395	phospholipid catabolic process
L8HK61	SPA33_BOVINSerpin A3-3 OS=Bos taurus OX=9913 GN=SERPINA3-3 PE=1 SV=2	C	GO:0005615	extracellular space
L8HK61	SPA33_BOVINSerpin A3-3 OS=Bos taurus OX=9913 GN=SERPINA3-3 PE=1 SV=2	C	GO:0042583	chromaffin granule
L8HK61	SPA33_BOVINSerpin A3-3 OS=Bos taurus OX=9913 GN=SERPINA3-3 PE=1 SV=2	F	GO:0004867	serine-type endopeptidase inhibitor activity
L8HK61	SPA33_BOVINSerpin A3-3 OS=Bos taurus OX=9913 GN=SERPINA3-3 PE=1 SV=2	F	GO:0004869	cysteine-type endopeptidase inhibitor activity
L8HK61	SPA33_BOVINSerpin A3-3 OS=Bos taurus OX=9913 GN=SERPINA3-3 PE=1 SV=2	P	GO:0009617	response to bacterium
L8HK61	SPA33_BOVINSerpin A3-3 OS=Bos taurus OX=9913 GN=SERPINA3-3 PE=1 SV=2	P	GO:0010951	negative regulation of endopeptidase activity
L8HK61	SPA33_BOVINSerpin A3-3 OS=Bos taurus OX=9913 GN=SERPINA3-3 PE=1 SV=2	P	GO:0034097	response to cytokine
L8HK61	SPA33_BOVINSerpin A3-3 OS=Bos taurus OX=9913 GN=SERPINA3-3 PE=1 SV=2	P	GO:0043434	response to peptide hormone
L8HW35	SPA37_BOVINSerpin A3-7 OS=Bos taurus OX=9913 GN=SERPINA3-7 PE=3 SV=1	C	GO:0005615	extracellular space
L8HW35	SPA37_BOVINSerpin A3-7 OS=Bos taurus OX=9913 GN=SERPINA3-7 PE=3 SV=1	C	GO:0031093	platelet alpha granule lumen
L8HW35	SPA37_BOVINSerpin A3-7 OS=Bos taurus OX=9913 GN=SERPINA3-7 PE=3 SV=1	C	GO:0042583	chromaffin granule
L8HW35	SPA37_BOVINSerpin A3-7 OS=Bos taurus OX=9913 GN=SERPINA3-7 PE=3 SV=1	F	GO:0003677	DNA binding
L8HW35	SPA37_BOVINSerpin A3-7 OS=Bos taurus OX=9913 GN=SERPINA3-7 PE=3 SV=1	F	GO:0004867	serine-type endopeptidase inhibitor activity
L8HW35	SPA37_BOVINSerpin A3-7 OS=Bos taurus OX=9913 GN=SERPINA3-7 PE=3 SV=1	F	GO:0004869	cysteine-type endopeptidase inhibitor activity
L8HW35	SPA37_BOVINSerpin A3-7 OS=Bos taurus OX=9913 GN=SERPINA3-7 PE=3 SV=1	F	GO:0005515	protein binding
L8HW35	SPA37_BOVINSerpin A3-7 OS=Bos taurus OX=9913 GN=SERPINA3-7 PE=3 SV=1	P	GO:0010951	negative regulation of endopeptidase activity
L8IE45	ANX11_BOVINAnnexin A11 OS=Bos taurus OX=9913 GN=ANXA11 PE=1 SV=1	C	GO:0005654	nucleoplasm
L8IE45	ANX11_BOVINAnnexin A11 OS=Bos taurus OX=9913 GN=ANXA11 PE=1 SV=1	C	GO:0005819	spindle
L8IE45	ANX11_BOVINAnnexin A11 OS=Bos taurus OX=9913 GN=ANXA11 PE=1 SV=1	C	GO:0005829	cytosol
L8IE45	ANX11_BOVINAnnexin A11 OS=Bos taurus OX=9913 GN=ANXA11 PE=1 SV=1	C	GO:0009986	cell surface
L8IE45	ANX11_BOVINAnnexin A11 OS=Bos taurus OX=9913 GN=ANXA11 PE=1 SV=1	C	GO:0016324	apical plasma membrane
L8IE45	ANX11_BOVINAnnexin A11 OS=Bos taurus OX=9913 GN=ANXA11 PE=1 SV=1	C	GO:0030496	midbody
L8IE45	ANX11_BOVINAnnexin A11 OS=Bos taurus OX=9913 GN=ANXA11 PE=1 SV=1	C	GO:0031965	nuclear membrane
L8IE45	ANX11_BOVINAnnexin A11 OS=Bos taurus OX=9913 GN=ANXA11 PE=1 SV=1	C	GO:0042470	melanosome
L8IE45	ANX11_BOVINAnnexin A11 OS=Bos taurus OX=9913 GN=ANXA11 PE=1 SV=1	C	GO:0042581	specific granule
L8IE45	ANX11_BOVINAnnexin A11 OS=Bos taurus OX=9913 GN=ANXA11 PE=1 SV=1	C	GO:0042582	azurophil granule
L8IE45	ANX11_BOVINAnnexin A11 OS=Bos taurus OX=9913 GN=ANXA11 PE=1 SV=1	C	GO:0042584	chromaffin granule membrane
L8IE45	ANX11_BOVINAnnexin A11 OS=Bos taurus OX=9913 GN=ANXA11 PE=1 SV=1	C	GO:0045335	phagocytic vesicle
L8IE45	ANX11_BOVINAnnexin A11 OS=Bos taurus OX=9913 GN=ANXA11 PE=1 SV=1	C	GO:0048471	perinuclear region of cytoplasm
L8IE45	ANX11_BOVINAnnexin A11 OS=Bos taurus OX=9913 GN=ANXA11 PE=1 SV=1	F	GO:0005509	calcium ion binding
L8IE45	ANX11_BOVINAnnexin A11 OS=Bos taurus OX=9913 GN=ANXA11 PE=1 SV=1	F	GO:0005544	calcium-dependent phospholipid binding
L8IE45	ANX11_BOVINAnnexin A11 OS=Bos taurus OX=9913 GN=ANXA11 PE=1 SV=1	F	GO:0008201	heparin binding
L8IE45	ANX11_BOVINAnnexin A11 OS=Bos taurus OX=9913 GN=ANXA11 PE=1 SV=1	F	GO:0008429	phosphatidylethanolamine binding
L8IE45	ANX11_BOVINAnnexin A11 OS=Bos taurus OX=9913 GN=ANXA11 PE=1 SV=1	F	GO:0030246	carbohydrate binding
L8IE45	ANX11_BOVINAnnexin A11 OS=Bos taurus OX=9913 GN=ANXA11 PE=1 SV=1	F	GO:0035374	chondroitin sulfate binding
L8IE45	ANX11_BOVINAnnexin A11 OS=Bos taurus OX=9913 GN=ANXA11 PE=1 SV=1	F	GO:0042802	identical protein binding
L8IE45	ANX11_BOVINAnnexin A11 OS=Bos taurus OX=9913 GN=ANXA11 PE=1 SV=1	F	GO:0044548	S100 protein binding
L8IE45	ANX11_BOVINAnnexin A11 OS=Bos taurus OX=9913 GN=ANXA11 PE=1 SV=1	F	GO:0048306	calcium-dependent protein binding
L8IE45	ANX11_BOVINAnnexin A11 OS=Bos taurus OX=9913 GN=ANXA11 PE=1 SV=1	F	GO:0051059	NF-kappaB binding
L8IE45	ANX11_BOVINAnnexin A11 OS=Bos taurus OX=9913 GN=ANXA11 PE=1 SV=1	P	GO:0001822	kidney development
L8IE45	ANX11_BOVINAnnexin A11 OS=Bos taurus OX=9913 GN=ANXA11 PE=1 SV=1	P	GO:0006887	exocytosis
L8IE45	ANX11_BOVINAnnexin A11 OS=Bos taurus OX=9913 GN=ANXA11 PE=1 SV=1	P	GO:0006909	phagocytosis
L8IE45	ANX11_BOVINAnnexin A11 OS=Bos taurus OX=9913 GN=ANXA11 PE=1 SV=1	P	GO:0007219	Notch signaling pathway
L8IE45	ANX11_BOVINAnnexin A11 OS=Bos taurus OX=9913 GN=ANXA11 PE=1 SV=1	P	GO:0030855	epithelial cell differentiation
L8IE45	ANX11_BOVINAnnexin A11 OS=Bos taurus OX=9913 GN=ANXA11 PE=1 SV=1	P	GO:0032088	negative regulation of NF-kappaB transcription factor activity
L8IE45	ANX11_BOVINAnnexin A11 OS=Bos taurus OX=9913 GN=ANXA11 PE=1 SV=1	P	GO:0032506	cytokinetic process
L8IE45	ANX11_BOVINAnnexin A11 OS=Bos taurus OX=9913 GN=ANXA11 PE=1 SV=1	P	GO:0051592	response to calcium ion
L8IE45	ANX11_BOVINAnnexin A11 OS=Bos taurus OX=9913 GN=ANXA11 PE=1 SV=1	C	GO:0005667	transcription factor complex
L8ICD7	THBG_BOVINThyroxine-binding globulin OS=Bos taurus OX=9913 GN=SERPINA7 PE=2 SV=1	C	GO:0005615	extracellular space
L8ICD7	THBG_BOVINThyroxine-binding globulin OS=Bos taurus OX=9913 GN=SERPINA7 PE=2 SV=1	F	GO:0004867	serine-type endopeptidase inhibitor activity
L8ICD7	THBG_BOVINThyroxine-binding globulin OS=Bos taurus OX=9913 GN=SERPINA7 PE=2 SV=1	F	GO:0015349	thyroid hormone transmembrane transporter activity
L8ICD7	THBG_BOVINThyroxine-binding globulin OS=Bos taurus OX=9913 GN=SERPINA7 PE=2 SV=1	F	GO:0042562	hormone binding
L8ICD7	THBG_BOVINThyroxine-binding globulin OS=Bos taurus OX=9913 GN=SERPINA7 PE=2 SV=1	P	GO:0007568	aging
L8ICD7	THBG_BOVINThyroxine-binding globulin OS=Bos taurus OX=9913 GN=SERPINA7 PE=2 SV=1	P	GO:0009791	post-embryonic development
L8ICD7	THBG_BOVINThyroxine-binding globulin OS=Bos taurus OX=9913 GN=SERPINA7 PE=2 SV=1	P	GO:0010951	negative regulation of endopeptidase activity
L8ICD7	THBG_BOVINThyroxine-binding globulin OS=Bos taurus OX=9913 GN=SERPINA7 PE=2 SV=1	P	GO:0033189	response to vitamin A
L8ICD7	THBG_BOVINThyroxine-binding globulin OS=Bos taurus OX=9913 GN=SERPINA7 PE=2 SV=1	P	GO:0034695	response to prostaglandin E
L8ICD7	THBG_BOVINThyroxine-binding globulin OS=Bos taurus OX=9913 GN=SERPINA7 PE=2 SV=1	P	GO:0042493	response to drug
L8ICD7	THBG_BOVINThyroxine-binding globulin OS=Bos taurus OX=9913 GN=SERPINA7 PE=2 SV=1	P	GO:0043434	response to peptide hormone
L8ICD7	THBG_BOVINThyroxine-binding globulin OS=Bos taurus OX=9913 GN=SERPINA7 PE=2 SV=1	P	GO:0051412	response to corticosterone
L8ICD7	THBG_BOVINThyroxine-binding globulin OS=Bos taurus OX=9913 GN=SERPINA7 PE=2 SV=1	P	GO:0070327	thyroid hormone transport
L8I8E6	PGAM1_BOVINPhosphoglycerate mutase 1 OS=Bos taurus OX=9913 GN=PGAM1 PE=2 SV=3	C	GO:0005576	extracellular region
L8I8E6	PGAM1_BOVINPhosphoglycerate mutase 1 OS=Bos taurus OX=9913 GN=PGAM1 PE=2 SV=3	C	GO:0005634	nucleus
L8I8E6	PGAM1_BOVINPhosphoglycerate mutase 1 OS=Bos taurus OX=9913 GN=PGAM1 PE=2 SV=3	C	GO:0005829	cytosol
L8I8E6	PGAM1_BOVINPhosphoglycerate mutase 1 OS=Bos taurus OX=9913 GN=PGAM1 PE=2 SV=3	C	GO:0034774	secretory granule lumen
L8I8E6	PGAM1_BOVINPhosphoglycerate mutase 1 OS=Bos taurus OX=9913 GN=PGAM1 PE=2 SV=3	C	GO:1904813	ficolin-1-rich granule lumen
L8I8E6	PGAM1_BOVINPhosphoglycerate mutase 1 OS=Bos taurus OX=9913 GN=PGAM1 PE=2 SV=3	F	GO:0004082	bisphosphoglycerate mutase activity
L8I8E6	PGAM1_BOVINPhosphoglycerate mutase 1 OS=Bos taurus OX=9913 GN=PGAM1 PE=2 SV=3	F	GO:0016787	hydrolase activity
L8I8E6	PGAM1_BOVINPhosphoglycerate mutase 1 OS=Bos taurus OX=9913 GN=PGAM1 PE=2 SV=3	F	GO:0019901	protein kinase binding
L8I8E6	PGAM1_BOVINPhosphoglycerate mutase 1 OS=Bos taurus OX=9913 GN=PGAM1 PE=2 SV=3	F	GO:0046538	2,3-bisphosphoglycerate-dependent phosphoglycerate mutase activity
L8I8E6	PGAM1_BOVINPhosphoglycerate mutase 1 OS=Bos taurus OX=9913 GN=PGAM1 PE=2 SV=3	F	GO:0048037	cofactor binding
L8I8E6	PGAM1_BOVINPhosphoglycerate mutase 1 OS=Bos taurus OX=9913 GN=PGAM1 PE=2 SV=3	P	GO:0006094	gluconeogenesis
L8I8E6	PGAM1_BOVINPhosphoglycerate mutase 1 OS=Bos taurus OX=9913 GN=PGAM1 PE=2 SV=3	P	GO:0006110	regulation of glycolytic process
L8I8E6	PGAM1_BOVINPhosphoglycerate mutase 1 OS=Bos taurus OX=9913 GN=PGAM1 PE=2 SV=3	P	GO:0006941	striated muscle contraction
L8I8E6	PGAM1_BOVINPhosphoglycerate mutase 1 OS=Bos taurus OX=9913 GN=PGAM1 PE=2 SV=3	P	GO:0007219	Notch signaling pathway
L8I8E6	PGAM1_BOVINPhosphoglycerate mutase 1 OS=Bos taurus OX=9913 GN=PGAM1 PE=2 SV=3	P	GO:0007283	spermatogenesis
L8I8E6	PGAM1_BOVINPhosphoglycerate mutase 1 OS=Bos taurus OX=9913 GN=PGAM1 PE=2 SV=3	P	GO:0043312	neutrophil degranulation
L8I8E6	PGAM1_BOVINPhosphoglycerate mutase 1 OS=Bos taurus OX=9913 GN=PGAM1 PE=2 SV=3	P	GO:0043456	regulation of pentose-phosphate shunt
L8I8E6	PGAM1_BOVINPhosphoglycerate mutase 1 OS=Bos taurus OX=9913 GN=PGAM1 PE=2 SV=3	P	GO:0045730	respiratory burst
L8I8E6	PGAM1_BOVINPhosphoglycerate mutase 1 OS=Bos taurus OX=9913 GN=PGAM1 PE=2 SV=3	P	GO:0046689	response to mercury ion
L8I8E6	PGAM1_BOVINPhosphoglycerate mutase 1 OS=Bos taurus OX=9913 GN=PGAM1 PE=2 SV=3	P	GO:0061621	canonical glycolysis
L8I8E6	PGAM1_BOVINPhosphoglycerate mutase 1 OS=Bos taurus OX=9913 GN=PGAM1 PE=2 SV=3	P	GO:1902093	positive regulation of flagellated sperm motility
L8HYH0	XPA_HUMANDNA repair complementing XP-A cells OS=Homo sapiens OX=9606 GN=XPA PE=1 SV=1	C	GO:0000110	nucleotide-excision repair factor 1 complex
L8HYH0	XPA_HUMANDNA repair complementing XP-A cells OS=Homo sapiens OX=9606 GN=XPA PE=1 SV=1	C	GO:0005654	nucleoplasm
L8HYH0	XPA_HUMANDNA repair complementing XP-A cells OS=Homo sapiens OX=9606 GN=XPA PE=1 SV=1	C	GO:0005662	DNA replication factor A complex
L8HYH0	XPA_HUMANDNA repair complementing XP-A cells OS=Homo sapiens OX=9606 GN=XPA PE=1 SV=1	C	GO:0005737	cytoplasm
L8HYH0	XPA_HUMANDNA repair complementing XP-A cells OS=Homo sapiens OX=9606 GN=XPA PE=1 SV=1	C	GO:0045171	intercellular bridge
L8HYH0	XPA_HUMANDNA repair complementing XP-A cells OS=Homo sapiens OX=9606 GN=XPA PE=1 SV=1	F	GO:0003684	damaged DNA binding
L8HYH0	XPA_HUMANDNA repair complementing XP-A cells OS=Homo sapiens OX=9606 GN=XPA PE=1 SV=1	F	GO:0019904	protein domain specific binding
L8HYH0	XPA_HUMANDNA repair complementing XP-A cells OS=Homo sapiens OX=9606 GN=XPA PE=1 SV=1	F	GO:0042803	protein homodimerization activity
L8HYH0	XPA_HUMANDNA repair complementing XP-A cells OS=Homo sapiens OX=9606 GN=XPA PE=1 SV=1	F	GO:0046872	metal ion binding
L8HYH0	XPA_HUMANDNA repair complementing XP-A cells OS=Homo sapiens OX=9606 GN=XPA PE=1 SV=1	P	GO:0000715	nucleotide-excision repair, DNA damage recognition
L8HYH0	XPA_HUMANDNA repair complementing XP-A cells OS=Homo sapiens OX=9606 GN=XPA PE=1 SV=1	P	GO:0000717	nucleotide-excision repair, DNA duplex unwinding
L8HYH0	XPA_HUMANDNA repair complementing XP-A cells OS=Homo sapiens OX=9606 GN=XPA PE=1 SV=1	P	GO:0006283	transcription-coupled nucleotide-excision repair
L8HYH0	XPA_HUMANDNA repair complementing XP-A cells OS=Homo sapiens OX=9606 GN=XPA PE=1 SV=1	P	GO:0006284	base-excision repair
L8HYH0	XPA_HUMANDNA repair complementing XP-A cells OS=Homo sapiens OX=9606 GN=XPA PE=1 SV=1	P	GO:0006293	nucleotide-excision repair, preincision complex stabilization
L8HYH0	XPA_HUMANDNA repair complementing XP-A cells OS=Homo sapiens OX=9606 GN=XPA PE=1 SV=1	P	GO:0006294	nucleotide-excision repair, preincision complex assembly
L8HYH0	XPA_HUMANDNA repair complementing XP-A cells OS=Homo sapiens OX=9606 GN=XPA PE=1 SV=1	P	GO:0006295	nucleotide-excision repair, DNA incision, 3'-to lesion
L8HYH0	XPA_HUMANDNA repair complementing XP-A cells OS=Homo sapiens OX=9606 GN=XPA PE=1 SV=1	P	GO:0006296	nucleotide-excision repair, DNA incision, 5'-to lesion
L8HYH0	XPA_HUMANDNA repair complementing XP-A cells OS=Homo sapiens OX=9606 GN=XPA PE=1 SV=1	P	GO:0006979	response to oxidative stress
L8HYH0	XPA_HUMANDNA repair complementing XP-A cells OS=Homo sapiens OX=9606 GN=XPA PE=1 SV=1	P	GO:0008630	intrinsic apoptotic signaling pathway in response to DNA damage
L8HYH0	XPA_HUMANDNA repair complementing XP-A cells OS=Homo sapiens OX=9606 GN=XPA PE=1 SV=1	P	GO:0009636	response to toxic substance
L8HYH0	XPA_HUMANDNA repair complementing XP-A cells OS=Homo sapiens OX=9606 GN=XPA PE=1 SV=1	P	GO:0009650	UV protection
L8HYH0	XPA_HUMANDNA repair complementing XP-A cells OS=Homo sapiens OX=9606 GN=XPA PE=1 SV=1	P	GO:0010506	regulation of autophagy
L8HYH0	XPA_HUMANDNA repair complementing XP-A cells OS=Homo sapiens OX=9606 GN=XPA PE=1 SV=1	P	GO:0010996	response to auditory stimulus
L8HYH0	XPA_HUMANDNA repair complementing XP-A cells OS=Homo sapiens OX=9606 GN=XPA PE=1 SV=1	P	GO:0034504	protein localization to nucleus
L8HYH0	XPA_HUMANDNA repair complementing XP-A cells OS=Homo sapiens OX=9606 GN=XPA PE=1 SV=1	P	GO:0035264	multicellular organism growth
L8HYH0	XPA_HUMANDNA repair complementing XP-A cells OS=Homo sapiens OX=9606 GN=XPA PE=1 SV=1	P	GO:0070911	global genome nucleotide-excision repair
L8HYH0	XPA_HUMANDNA repair complementing XP-A cells OS=Homo sapiens OX=9606 GN=XPA PE=1 SV=1	P	GO:0070914	UV-damage excision repair
L8HYH0	XPA_HUMANDNA repair complementing XP-A cells OS=Homo sapiens OX=9606 GN=XPA PE=1 SV=1	P	GO:1901255	nucleotide-excision repair involved in interstrand cross-link repair
L8J0L8	MTND_BOVIN1,2-dihydroxy-3-keto-5-methylthiopentene dioxygenase OS=Bos taurus OX=9913 GN=ADI1 PE=2 SV=2	C	GO:0005634	nucleus
L8J0L8	MTND_BOVIN1,2-dihydroxy-3-keto-5-methylthiopentene dioxygenase OS=Bos taurus OX=9913 GN=ADI1 PE=2 SV=2	C	GO:0005829	cytosol
L8J0L8	MTND_BOVIN1,2-dihydroxy-3-keto-5-methylthiopentene dioxygenase OS=Bos taurus OX=9913 GN=ADI1 PE=2 SV=2	C	GO:0005886	plasma membrane
L8J0L8	MTND_BOVIN1,2-dihydroxy-3-keto-5-methylthiopentene dioxygenase OS=Bos taurus OX=9913 GN=ADI1 PE=2 SV=2	F	GO:0005506	iron ion binding
L8J0L8	MTND_BOVIN1,2-dihydroxy-3-keto-5-methylthiopentene dioxygenase OS=Bos taurus OX=9913 GN=ADI1 PE=2 SV=2	F	GO:0005515	protein binding
L8J0L8	MTND_BOVIN1,2-dihydroxy-3-keto-5-methylthiopentene dioxygenase OS=Bos taurus OX=9913 GN=ADI1 PE=2 SV=2	F	GO:0010309	acireductone dioxygenase [iron(II)-requiring] activity
L8J0L8	MTND_BOVIN1,2-dihydroxy-3-keto-5-methylthiopentene dioxygenase OS=Bos taurus OX=9913 GN=ADI1 PE=2 SV=2	P	GO:0019509	L-methionine salvage from methylthioadenosine
L8J0L8	MTND_BOVIN1,2-dihydroxy-3-keto-5-methylthiopentene dioxygenase OS=Bos taurus OX=9913 GN=ADI1 PE=2 SV=2	P	GO:0055114	oxidation-reduction process
L8ICD6	LDHA_BOVINL-lactate dehydrogenase A chain OS=Bos taurus OX=9913 GN=LDHA PE=2 SV=2	C	GO:0005829	cytosol
L8ICD6	LDHA_BOVINL-lactate dehydrogenase A chain OS=Bos taurus OX=9913 GN=LDHA PE=2 SV=2	C	GO:0035686	sperm fibrous sheath
L8ICD6	LDHA_BOVINL-lactate dehydrogenase A chain OS=Bos taurus OX=9913 GN=LDHA PE=2 SV=2	F	GO:0004459	L-lactate dehydrogenase activity
L8ICD6	LDHA_BOVINL-lactate dehydrogenase A chain OS=Bos taurus OX=9913 GN=LDHA PE=2 SV=2	F	GO:0019900	kinase binding
L8ICD6	LDHA_BOVINL-lactate dehydrogenase A chain OS=Bos taurus OX=9913 GN=LDHA PE=2 SV=2	F	GO:0042802	identical protein binding
L8ICD6	LDHA_BOVINL-lactate dehydrogenase A chain OS=Bos taurus OX=9913 GN=LDHA PE=2 SV=2	F	GO:0051287	NAD binding
L8ICD6	LDHA_BOVINL-lactate dehydrogenase A chain OS=Bos taurus OX=9913 GN=LDHA PE=2 SV=2	P	GO:0001666	response to hypoxia
L8ICD6	LDHA_BOVINL-lactate dehydrogenase A chain OS=Bos taurus OX=9913 GN=LDHA PE=2 SV=2	P	GO:0006096	glycolytic process
L8ICD6	LDHA_BOVINL-lactate dehydrogenase A chain OS=Bos taurus OX=9913 GN=LDHA PE=2 SV=2	P	GO:0007584	response to nutrient
L8ICD6	LDHA_BOVINL-lactate dehydrogenase A chain OS=Bos taurus OX=9913 GN=LDHA PE=2 SV=2	P	GO:0009749	response to glucose
L8ICD6	LDHA_BOVINL-lactate dehydrogenase A chain OS=Bos taurus OX=9913 GN=LDHA PE=2 SV=2	P	GO:0019244	lactate biosynthetic process from pyruvate
L8ICD6	LDHA_BOVINL-lactate dehydrogenase A chain OS=Bos taurus OX=9913 GN=LDHA PE=2 SV=2	P	GO:0019661	glucose catabolic process to lactate via pyruvate
L8ICD6	LDHA_BOVINL-lactate dehydrogenase A chain OS=Bos taurus OX=9913 GN=LDHA PE=2 SV=2	P	GO:0031668	cellular response to extracellular stimulus
L8ICD6	LDHA_BOVINL-lactate dehydrogenase A chain OS=Bos taurus OX=9913 GN=LDHA PE=2 SV=2	P	GO:0042542	response to hydrogen peroxide
L8ICD6	LDHA_BOVINL-lactate dehydrogenase A chain OS=Bos taurus OX=9913 GN=LDHA PE=2 SV=2	P	GO:0043065	positive regulation of apoptotic process
L8ICD6	LDHA_BOVINL-lactate dehydrogenase A chain OS=Bos taurus OX=9913 GN=LDHA PE=2 SV=2	P	GO:0043627	response to estrogen
L8ICD6	LDHA_BOVINL-lactate dehydrogenase A chain OS=Bos taurus OX=9913 GN=LDHA PE=2 SV=2	P	GO:0048569	post-embryonic animal organ development
L8ICD6	LDHA_BOVINL-lactate dehydrogenase A chain OS=Bos taurus OX=9913 GN=LDHA PE=2 SV=2	P	GO:0051591	response to cAMP
L8ICD6	LDHA_BOVINL-lactate dehydrogenase A chain OS=Bos taurus OX=9913 GN=LDHA PE=2 SV=2	P	GO:0006094	gluconeogenesis
L8ICD6	LDHA_BOVINL-lactate dehydrogenase A chain OS=Bos taurus OX=9913 GN=LDHA PE=2 SV=2	P	GO:0006534	cysteine metabolic process
L8IBZ3	PEX2_HUMANPeroxisome biogenesis factor 2 OS=Homo sapiens OX=9606 GN=PEX2 PE=1 SV=2	C	GO:0005779	integral component of peroxisomal membrane
L8IBZ3	PEX2_HUMANPeroxisome biogenesis factor 2 OS=Homo sapiens OX=9606 GN=PEX2 PE=1 SV=2	C	GO:0016593	Cdc73/Paf1 complex
L8IBZ3	PEX2_HUMANPeroxisome biogenesis factor 2 OS=Homo sapiens OX=9606 GN=PEX2 PE=1 SV=2	F	GO:0046872	metal ion binding
L8IBZ3	PEX2_HUMANPeroxisome biogenesis factor 2 OS=Homo sapiens OX=9606 GN=PEX2 PE=1 SV=2	P	GO:0000038	very long-chain fatty acid metabolic process
L8IBZ3	PEX2_HUMANPeroxisome biogenesis factor 2 OS=Homo sapiens OX=9606 GN=PEX2 PE=1 SV=2	P	GO:0000122	negative regulation of transcription by RNA polymerase II
L8IBZ3	PEX2_HUMANPeroxisome biogenesis factor 2 OS=Homo sapiens OX=9606 GN=PEX2 PE=1 SV=2	P	GO:0001764	neuron migration
L8IBZ3	PEX2_HUMANPeroxisome biogenesis factor 2 OS=Homo sapiens OX=9606 GN=PEX2 PE=1 SV=2	P	GO:0006635	fatty acid beta-oxidation
L8IBZ3	PEX2_HUMANPeroxisome biogenesis factor 2 OS=Homo sapiens OX=9606 GN=PEX2 PE=1 SV=2	P	GO:0006699	bile acid biosynthetic process
L8IBZ3	PEX2_HUMANPeroxisome biogenesis factor 2 OS=Homo sapiens OX=9606 GN=PEX2 PE=1 SV=2	P	GO:0016558	protein import into peroxisome matrix
L8IBZ3	PEX2_HUMANPeroxisome biogenesis factor 2 OS=Homo sapiens OX=9606 GN=PEX2 PE=1 SV=2	P	GO:0031648	protein destabilization
L8IBZ3	PEX2_HUMANPeroxisome biogenesis factor 2 OS=Homo sapiens OX=9606 GN=PEX2 PE=1 SV=2	P	GO:0042632	cholesterol homeostasis
L8IBZ3	PEX2_HUMANPeroxisome biogenesis factor 2 OS=Homo sapiens OX=9606 GN=PEX2 PE=1 SV=2	P	GO:0045540	regulation of cholesterol biosynthetic process
L8IBZ3	PEX2_HUMANPeroxisome biogenesis factor 2 OS=Homo sapiens OX=9606 GN=PEX2 PE=1 SV=2	P	GO:0048147	negative regulation of fibroblast proliferation
L8IBZ3	PEX2_HUMANPeroxisome biogenesis factor 2 OS=Homo sapiens OX=9606 GN=PEX2 PE=1 SV=2	P	GO:0050680	negative regulation of epithelial cell proliferation
L8IJG9	CAF1A_BOVINChromatin assembly factor 1 subunit A OS=Bos taurus OX=9913 GN=CHAF1A PE=2 SV=1	C	GO:0000790	nuclear chromatin
L8IJG9	CAF1A_BOVINChromatin assembly factor 1 subunit A OS=Bos taurus OX=9913 GN=CHAF1A PE=2 SV=1	C	GO:0033186	CAF-1 complex
L8IJG9	CAF1A_BOVINChromatin assembly factor 1 subunit A OS=Bos taurus OX=9913 GN=CHAF1A PE=2 SV=1	F	GO:0003682	chromatin binding
L8IJG9	CAF1A_BOVINChromatin assembly factor 1 subunit A OS=Bos taurus OX=9913 GN=CHAF1A PE=2 SV=1	F	GO:0042802	identical protein binding
L8IJG9	CAF1A_BOVINChromatin assembly factor 1 subunit A OS=Bos taurus OX=9913 GN=CHAF1A PE=2 SV=1	F	GO:0051082	unfolded protein binding
L8IJG9	CAF1A_BOVINChromatin assembly factor 1 subunit A OS=Bos taurus OX=9913 GN=CHAF1A PE=2 SV=1	F	GO:0070087	chromo shadow domain binding
L8IJG9	CAF1A_BOVINChromatin assembly factor 1 subunit A OS=Bos taurus OX=9913 GN=CHAF1A PE=2 SV=1	P	GO:0006260	DNA replication
L8IJG9	CAF1A_BOVINChromatin assembly factor 1 subunit A OS=Bos taurus OX=9913 GN=CHAF1A PE=2 SV=1	P	GO:0006281	DNA repair
L8IJG9	CAF1A_BOVINChromatin assembly factor 1 subunit A OS=Bos taurus OX=9913 GN=CHAF1A PE=2 SV=1	P	GO:0006335	DNA replication-dependent nucleosome assembly
L8IJG9	CAF1A_BOVINChromatin assembly factor 1 subunit A OS=Bos taurus OX=9913 GN=CHAF1A PE=2 SV=1	P	GO:0007049	cell cycle
L8IZX3	PGK1_BOVINPhosphoglycerate kinase 1 OS=Bos taurus OX=9913 GN=PGK1 PE=2 SV=3	C	GO:0005615	extracellular space
L8IZX3	PGK1_BOVINPhosphoglycerate kinase 1 OS=Bos taurus OX=9913 GN=PGK1 PE=2 SV=3	C	GO:0005829	cytosol
L8IZX3	PGK1_BOVINPhosphoglycerate kinase 1 OS=Bos taurus OX=9913 GN=PGK1 PE=2 SV=3	C	GO:0045121	membrane raft
L8IZX3	PGK1_BOVINPhosphoglycerate kinase 1 OS=Bos taurus OX=9913 GN=PGK1 PE=2 SV=3	F	GO:0004618	phosphoglycerate kinase activity
L8IZX3	PGK1_BOVINPhosphoglycerate kinase 1 OS=Bos taurus OX=9913 GN=PGK1 PE=2 SV=3	F	GO:0005515	protein binding
L8IZX3	PGK1_BOVINPhosphoglycerate kinase 1 OS=Bos taurus OX=9913 GN=PGK1 PE=2 SV=3	F	GO:0005524	ATP binding
L8IZX3	PGK1_BOVINPhosphoglycerate kinase 1 OS=Bos taurus OX=9913 GN=PGK1 PE=2 SV=3	F	GO:0043531	ADP binding
L8IZX3	PGK1_BOVINPhosphoglycerate kinase 1 OS=Bos taurus OX=9913 GN=PGK1 PE=2 SV=3	F	GO:0047134	protein-disulfide reductase activity
L8IZX3	PGK1_BOVINPhosphoglycerate kinase 1 OS=Bos taurus OX=9913 GN=PGK1 PE=2 SV=3	P	GO:0006094	gluconeogenesis
L8IZX3	PGK1_BOVINPhosphoglycerate kinase 1 OS=Bos taurus OX=9913 GN=PGK1 PE=2 SV=3	P	GO:0016525	negative regulation of angiogenesis
L8IZX3	PGK1_BOVINPhosphoglycerate kinase 1 OS=Bos taurus OX=9913 GN=PGK1 PE=2 SV=3	P	GO:0030855	epithelial cell differentiation
L8IZX3	PGK1_BOVINPhosphoglycerate kinase 1 OS=Bos taurus OX=9913 GN=PGK1 PE=2 SV=3	P	GO:0031639	plasminogen activation
L8IZX3	PGK1_BOVINPhosphoglycerate kinase 1 OS=Bos taurus OX=9913 GN=PGK1 PE=2 SV=3	P	GO:0061621	canonical glycolysis
L8IZX3	PGK1_BOVINPhosphoglycerate kinase 1 OS=Bos taurus OX=9913 GN=PGK1 PE=2 SV=3	P	GO:0071456	cellular response to hypoxia
L8IZX3	PGK1_BOVINPhosphoglycerate kinase 1 OS=Bos taurus OX=9913 GN=PGK1 PE=2 SV=3	P	GO:1903862	positive regulation of oxidative phosphorylation
L8IZX3	PGK1_BOVINPhosphoglycerate kinase 1 OS=Bos taurus OX=9913 GN=PGK1 PE=2 SV=3	P	GO:0015976	carbon utilization
L8HX06	ANGT_SHEEPAngiotensinogen OS=Ovis aries OX=9940 GN=AGT PE=1 SV=2	C	GO:0005615	extracellular space
L8HX06	ANGT_SHEEPAngiotensinogen OS=Ovis aries OX=9940 GN=AGT PE=1 SV=2	C	GO:0005739	mitochondrion
L8HX06	ANGT_SHEEPAngiotensinogen OS=Ovis aries OX=9940 GN=AGT PE=1 SV=2	C	GO:0005829	cytosol
L8HX06	ANGT_SHEEPAngiotensinogen OS=Ovis aries OX=9940 GN=AGT PE=1 SV=2	C	GO:0031982	vesicle
L8HX06	ANGT_SHEEPAngiotensinogen OS=Ovis aries OX=9940 GN=AGT PE=1 SV=2	C	GO:0097180	serine protease inhibitor complex
L8HX06	ANGT_SHEEPAngiotensinogen OS=Ovis aries OX=9940 GN=AGT PE=1 SV=2	F	GO:0004867	serine-type endopeptidase inhibitor activity
L8HX06	ANGT_SHEEPAngiotensinogen OS=Ovis aries OX=9940 GN=AGT PE=1 SV=2	F	GO:0005179	hormone activity
L8HX06	ANGT_SHEEPAngiotensinogen OS=Ovis aries OX=9940 GN=AGT PE=1 SV=2	F	GO:0008083	growth factor activity
L8HX06	ANGT_SHEEPAngiotensinogen OS=Ovis aries OX=9940 GN=AGT PE=1 SV=2	F	GO:0017080	sodium channel regulator activity
L8HX06	ANGT_SHEEPAngiotensinogen OS=Ovis aries OX=9940 GN=AGT PE=1 SV=2	F	GO:0031702	type 1 angiotensin receptor binding
L8HX06	ANGT_SHEEPAngiotensinogen OS=Ovis aries OX=9940 GN=AGT PE=1 SV=2	F	GO:0031703	type 2 angiotensin receptor binding
L8HX06	ANGT_SHEEPAngiotensinogen OS=Ovis aries OX=9940 GN=AGT PE=1 SV=2	P	GO:0001543	ovarian follicle rupture
L8HX06	ANGT_SHEEPAngiotensinogen OS=Ovis aries OX=9940 GN=AGT PE=1 SV=2	P	GO:0001974	blood vessel remodeling
L8HX06	ANGT_SHEEPAngiotensinogen OS=Ovis aries OX=9940 GN=AGT PE=1 SV=2	P	GO:0001998	angiotensin-mediated vasoconstriction involved in regulation of systemic arterial blood pressure
L8HX06	ANGT_SHEEPAngiotensinogen OS=Ovis aries OX=9940 GN=AGT PE=1 SV=2	P	GO:0001999	renal response to blood flow involved in circulatory renin-angiotensin regulation of systemic arterial blood pressure
L8HX06	ANGT_SHEEPAngiotensinogen OS=Ovis aries OX=9940 GN=AGT PE=1 SV=2	P	GO:0002018	renin-angiotensin regulation of aldosterone production
L8HX06	ANGT_SHEEPAngiotensinogen OS=Ovis aries OX=9940 GN=AGT PE=1 SV=2	P	GO:0002019	regulation of renal output by angiotensin
L8HX06	ANGT_SHEEPAngiotensinogen OS=Ovis aries OX=9940 GN=AGT PE=1 SV=2	P	GO:0002027	regulation of heart rate
L8HX06	ANGT_SHEEPAngiotensinogen OS=Ovis aries OX=9940 GN=AGT PE=1 SV=2	P	GO:0003051	angiotensin-mediated drinking behavior
L8HX06	ANGT_SHEEPAngiotensinogen OS=Ovis aries OX=9940 GN=AGT PE=1 SV=2	P	GO:0003331	positive regulation of extracellular matrix constituent secretion
L8HX06	ANGT_SHEEPAngiotensinogen OS=Ovis aries OX=9940 GN=AGT PE=1 SV=2	P	GO:0006606	protein import into nucleus
L8HX06	ANGT_SHEEPAngiotensinogen OS=Ovis aries OX=9940 GN=AGT PE=1 SV=2	P	GO:0006883	cellular sodium ion homeostasis
L8HX06	ANGT_SHEEPAngiotensinogen OS=Ovis aries OX=9940 GN=AGT PE=1 SV=2	P	GO:0007160	cell-matrix adhesion
L8HX06	ANGT_SHEEPAngiotensinogen OS=Ovis aries OX=9940 GN=AGT PE=1 SV=2	P	GO:0007199	G protein-coupled receptor signaling pathway coupled to cGMP nucleotide second messenger
L8HX06	ANGT_SHEEPAngiotensinogen OS=Ovis aries OX=9940 GN=AGT PE=1 SV=2	P	GO:0007202	activation of phospholipase C activity
L8HX06	ANGT_SHEEPAngiotensinogen OS=Ovis aries OX=9940 GN=AGT PE=1 SV=2	P	GO:0007204	positive regulation of cytosolic calcium ion concentration
L8HX06	ANGT_SHEEPAngiotensinogen OS=Ovis aries OX=9940 GN=AGT PE=1 SV=2	P	GO:0007250	activation of NF-kappaB-inducing kinase activity
L8HX06	ANGT_SHEEPAngiotensinogen OS=Ovis aries OX=9940 GN=AGT PE=1 SV=2	P	GO:0007263	nitric oxide mediated signal transduction
L8HX06	ANGT_SHEEPAngiotensinogen OS=Ovis aries OX=9940 GN=AGT PE=1 SV=2	P	GO:0007565	female pregnancy
L8HX06	ANGT_SHEEPAngiotensinogen OS=Ovis aries OX=9940 GN=AGT PE=1 SV=2	P	GO:0007568	aging
L8HX06	ANGT_SHEEPAngiotensinogen OS=Ovis aries OX=9940 GN=AGT PE=1 SV=2	P	GO:0008065	establishment of blood-nerve barrier
L8HX06	ANGT_SHEEPAngiotensinogen OS=Ovis aries OX=9940 GN=AGT PE=1 SV=2	P	GO:0008285	negative regulation of cell population proliferation
L8HX06	ANGT_SHEEPAngiotensinogen OS=Ovis aries OX=9940 GN=AGT PE=1 SV=2	P	GO:0008306	associative learning
L8HX06	ANGT_SHEEPAngiotensinogen OS=Ovis aries OX=9940 GN=AGT PE=1 SV=2	P	GO:0009409	response to cold
L8HX06	ANGT_SHEEPAngiotensinogen OS=Ovis aries OX=9940 GN=AGT PE=1 SV=2	P	GO:0009651	response to salt stress
L8HX06	ANGT_SHEEPAngiotensinogen OS=Ovis aries OX=9940 GN=AGT PE=1 SV=2	P	GO:0010536	positive regulation of activation of Janus kinase activity
L8HX06	ANGT_SHEEPAngiotensinogen OS=Ovis aries OX=9940 GN=AGT PE=1 SV=2	P	GO:0010595	positive regulation of endothelial cell migration
L8HX06	ANGT_SHEEPAngiotensinogen OS=Ovis aries OX=9940 GN=AGT PE=1 SV=2	P	GO:0010613	positive regulation of cardiac muscle hypertrophy
L8HX06	ANGT_SHEEPAngiotensinogen OS=Ovis aries OX=9940 GN=AGT PE=1 SV=2	P	GO:0010629	negative regulation of gene expression
L8HX06	ANGT_SHEEPAngiotensinogen OS=Ovis aries OX=9940 GN=AGT PE=1 SV=2	P	GO:0010666	positive regulation of cardiac muscle cell apoptotic process
L8HX06	ANGT_SHEEPAngiotensinogen OS=Ovis aries OX=9940 GN=AGT PE=1 SV=2	P	GO:0010744	positive regulation of macrophage derived foam cell differentiation
L8HX06	ANGT_SHEEPAngiotensinogen OS=Ovis aries OX=9940 GN=AGT PE=1 SV=2	P	GO:0010873	positive regulation of cholesterol esterification
L8HX06	ANGT_SHEEPAngiotensinogen OS=Ovis aries OX=9940 GN=AGT PE=1 SV=2	P	GO:0010951	negative regulation of endopeptidase activity
L8HX06	ANGT_SHEEPAngiotensinogen OS=Ovis aries OX=9940 GN=AGT PE=1 SV=2	P	GO:0010976	positive regulation of neuron projection development
L8HX06	ANGT_SHEEPAngiotensinogen OS=Ovis aries OX=9940 GN=AGT PE=1 SV=2	P	GO:0014061	regulation of norepinephrine secretion
L8HX06	ANGT_SHEEPAngiotensinogen OS=Ovis aries OX=9940 GN=AGT PE=1 SV=2	P	GO:0014068	positive regulation of phosphatidylinositol 3-kinase signaling
L8HX06	ANGT_SHEEPAngiotensinogen OS=Ovis aries OX=9940 GN=AGT PE=1 SV=2	P	GO:0014824	artery smooth muscle contraction
L8HX06	ANGT_SHEEPAngiotensinogen OS=Ovis aries OX=9940 GN=AGT PE=1 SV=2	P	GO:0014873	response to muscle activity involved in regulation of muscle adaptation
L8HX06	ANGT_SHEEPAngiotensinogen OS=Ovis aries OX=9940 GN=AGT PE=1 SV=2	P	GO:0016525	negative regulation of angiogenesis
L8HX06	ANGT_SHEEPAngiotensinogen OS=Ovis aries OX=9940 GN=AGT PE=1 SV=2	P	GO:0019229	regulation of vasoconstriction
L8HX06	ANGT_SHEEPAngiotensinogen OS=Ovis aries OX=9940 GN=AGT PE=1 SV=2	P	GO:0030308	negative regulation of cell growth
L8HX06	ANGT_SHEEPAngiotensinogen OS=Ovis aries OX=9940 GN=AGT PE=1 SV=2	P	GO:0030432	peristalsis
L8HX06	ANGT_SHEEPAngiotensinogen OS=Ovis aries OX=9940 GN=AGT PE=1 SV=2	P	GO:0032355	response to estradiol
L8HX06	ANGT_SHEEPAngiotensinogen OS=Ovis aries OX=9940 GN=AGT PE=1 SV=2	P	GO:0032930	positive regulation of superoxide anion generation
L8HX06	ANGT_SHEEPAngiotensinogen OS=Ovis aries OX=9940 GN=AGT PE=1 SV=2	P	GO:0033138	positive regulation of peptidyl-serine phosphorylation
L8HX06	ANGT_SHEEPAngiotensinogen OS=Ovis aries OX=9940 GN=AGT PE=1 SV=2	P	GO:0033864	positive regulation of NAD(P)H oxidase activity
L8HX06	ANGT_SHEEPAngiotensinogen OS=Ovis aries OX=9940 GN=AGT PE=1 SV=2	P	GO:0034104	negative regulation of tissue remodeling
L8HX06	ANGT_SHEEPAngiotensinogen OS=Ovis aries OX=9940 GN=AGT PE=1 SV=2	P	GO:0034374	low-density lipoprotein particle remodeling
L8HX06	ANGT_SHEEPAngiotensinogen OS=Ovis aries OX=9940 GN=AGT PE=1 SV=2	P	GO:0035106	operant conditioning
L8HX06	ANGT_SHEEPAngiotensinogen OS=Ovis aries OX=9940 GN=AGT PE=1 SV=2	P	GO:0035815	positive regulation of renal sodium excretion
L8HX06	ANGT_SHEEPAngiotensinogen OS=Ovis aries OX=9940 GN=AGT PE=1 SV=2	P	GO:0038166	angiotensin-activated signaling pathway
L8HX06	ANGT_SHEEPAngiotensinogen OS=Ovis aries OX=9940 GN=AGT PE=1 SV=2	P	GO:0040018	positive regulation of multicellular organism growth
L8HX06	ANGT_SHEEPAngiotensinogen OS=Ovis aries OX=9940 GN=AGT PE=1 SV=2	P	GO:0042311	vasodilation
L8HX06	ANGT_SHEEPAngiotensinogen OS=Ovis aries OX=9940 GN=AGT PE=1 SV=2	P	GO:0042445	hormone metabolic process
L8HX06	ANGT_SHEEPAngiotensinogen OS=Ovis aries OX=9940 GN=AGT PE=1 SV=2	P	GO:0043410	positive regulation of MAPK cascade
L8HX06	ANGT_SHEEPAngiotensinogen OS=Ovis aries OX=9940 GN=AGT PE=1 SV=2	P	GO:0043524	negative regulation of neuron apoptotic process
L8HX06	ANGT_SHEEPAngiotensinogen OS=Ovis aries OX=9940 GN=AGT PE=1 SV=2	P	GO:0045429	positive regulation of nitric oxide biosynthetic process
L8HX06	ANGT_SHEEPAngiotensinogen OS=Ovis aries OX=9940 GN=AGT PE=1 SV=2	P	GO:0045723	positive regulation of fatty acid biosynthetic process
L8HX06	ANGT_SHEEPAngiotensinogen OS=Ovis aries OX=9940 GN=AGT PE=1 SV=2	P	GO:0045742	positive regulation of epidermal growth factor receptor signaling pathway
L8HX06	ANGT_SHEEPAngiotensinogen OS=Ovis aries OX=9940 GN=AGT PE=1 SV=2	P	GO:0045893	positive regulation of transcription, DNA-templated
L8HX06	ANGT_SHEEPAngiotensinogen OS=Ovis aries OX=9940 GN=AGT PE=1 SV=2	P	GO:0046622	positive regulation of organ growth
L8HX06	ANGT_SHEEPAngiotensinogen OS=Ovis aries OX=9940 GN=AGT PE=1 SV=2	P	GO:0046628	positive regulation of insulin receptor signaling pathway
L8HX06	ANGT_SHEEPAngiotensinogen OS=Ovis aries OX=9940 GN=AGT PE=1 SV=2	P	GO:0048143	astrocyte activation
L8HX06	ANGT_SHEEPAngiotensinogen OS=Ovis aries OX=9940 GN=AGT PE=1 SV=2	P	GO:0048146	positive regulation of fibroblast proliferation
L8HX06	ANGT_SHEEPAngiotensinogen OS=Ovis aries OX=9940 GN=AGT PE=1 SV=2	P	GO:0048169	regulation of long-term neuronal synaptic plasticity
L8HX06	ANGT_SHEEPAngiotensinogen OS=Ovis aries OX=9940 GN=AGT PE=1 SV=2	P	GO:0050715	positive regulation of cytokine secretion
L8HX06	ANGT_SHEEPAngiotensinogen OS=Ovis aries OX=9940 GN=AGT PE=1 SV=2	P	GO:0050729	positive regulation of inflammatory response
L8HX06	ANGT_SHEEPAngiotensinogen OS=Ovis aries OX=9940 GN=AGT PE=1 SV=2	P	GO:0051092	positive regulation of NF-kappaB transcription factor activity
L8HX06	ANGT_SHEEPAngiotensinogen OS=Ovis aries OX=9940 GN=AGT PE=1 SV=2	P	GO:0051145	smooth muscle cell differentiation
L8HX06	ANGT_SHEEPAngiotensinogen OS=Ovis aries OX=9940 GN=AGT PE=1 SV=2	P	GO:0051387	negative regulation of neurotrophin TRK receptor signaling pathway
L8HX06	ANGT_SHEEPAngiotensinogen OS=Ovis aries OX=9940 GN=AGT PE=1 SV=2	P	GO:0051403	stress-activated MAPK cascade
L8HX06	ANGT_SHEEPAngiotensinogen OS=Ovis aries OX=9940 GN=AGT PE=1 SV=2	P	GO:0051924	regulation of calcium ion transport
L8HX06	ANGT_SHEEPAngiotensinogen OS=Ovis aries OX=9940 GN=AGT PE=1 SV=2	P	GO:0051969	regulation of transmission of nerve impulse
L8HX06	ANGT_SHEEPAngiotensinogen OS=Ovis aries OX=9940 GN=AGT PE=1 SV=2	P	GO:0061049	cell growth involved in cardiac muscle cell development
L8HX06	ANGT_SHEEPAngiotensinogen OS=Ovis aries OX=9940 GN=AGT PE=1 SV=2	P	GO:0061098	positive regulation of protein tyrosine kinase activity
L8HX06	ANGT_SHEEPAngiotensinogen OS=Ovis aries OX=9940 GN=AGT PE=1 SV=2	P	GO:0070371	ERK1 and ERK2 cascade
L8HX06	ANGT_SHEEPAngiotensinogen OS=Ovis aries OX=9940 GN=AGT PE=1 SV=2	P	GO:0070471	uterine smooth muscle contraction
L8HX06	ANGT_SHEEPAngiotensinogen OS=Ovis aries OX=9940 GN=AGT PE=1 SV=2	P	GO:0071260	cellular response to mechanical stimulus
L8HX06	ANGT_SHEEPAngiotensinogen OS=Ovis aries OX=9940 GN=AGT PE=1 SV=2	P	GO:0090190	positive regulation of branching involved in ureteric bud morphogenesis
L8HX06	ANGT_SHEEPAngiotensinogen OS=Ovis aries OX=9940 GN=AGT PE=1 SV=2	P	GO:1900020	positive regulation of protein kinase C activity
L8HX06	ANGT_SHEEPAngiotensinogen OS=Ovis aries OX=9940 GN=AGT PE=1 SV=2	P	GO:1901201	regulation of extracellular matrix assembly
L8HX06	ANGT_SHEEPAngiotensinogen OS=Ovis aries OX=9940 GN=AGT PE=1 SV=2	P	GO:1902632	positive regulation of membrane hyperpolarization
L8HX06	ANGT_SHEEPAngiotensinogen OS=Ovis aries OX=9940 GN=AGT PE=1 SV=2	P	GO:1903598	positive regulation of gap junction assembly
L8HX06	ANGT_SHEEPAngiotensinogen OS=Ovis aries OX=9940 GN=AGT PE=1 SV=2	P	GO:1903779	regulation of cardiac conduction
L8HX06	ANGT_SHEEPAngiotensinogen OS=Ovis aries OX=9940 GN=AGT PE=1 SV=2	P	GO:1904707	positive regulation of vascular smooth muscle cell proliferation
L8HX06	ANGT_SHEEPAngiotensinogen OS=Ovis aries OX=9940 GN=AGT PE=1 SV=2	P	GO:1904754	positive regulation of vascular associated smooth muscle cell migration
L8HX06	ANGT_SHEEPAngiotensinogen OS=Ovis aries OX=9940 GN=AGT PE=1 SV=2	P	GO:1905010	positive regulation of L-lysine import across plasma membrane
L8HX06	ANGT_SHEEPAngiotensinogen OS=Ovis aries OX=9940 GN=AGT PE=1 SV=2	P	GO:1905589	positive regulation of L-arginine import across plasma membrane
L8HX06	ANGT_SHEEPAngiotensinogen OS=Ovis aries OX=9940 GN=AGT PE=1 SV=2	P	GO:2000650	negative regulation of sodium ion transmembrane transporter activity
L8HX06	ANGT_SHEEPAngiotensinogen OS=Ovis aries OX=9940 GN=AGT PE=1 SV=2	P	GO:2001238	positive regulation of extrinsic apoptotic signaling pathway
L8HXP8	TPIS_HUMANTriosephosphate isomerase OS=Homo sapiens OX=9606 GN=TPI1 PE=1 SV=3	C	GO:0005829	cytosol
L8HXP8	TPIS_HUMANTriosephosphate isomerase OS=Homo sapiens OX=9606 GN=TPI1 PE=1 SV=3	F	GO:0004807	triose-phosphate isomerase activity
L8HXP8	TPIS_HUMANTriosephosphate isomerase OS=Homo sapiens OX=9606 GN=TPI1 PE=1 SV=3	F	GO:0008929	methylglyoxal synthase activity
L8HXP8	TPIS_HUMANTriosephosphate isomerase OS=Homo sapiens OX=9606 GN=TPI1 PE=1 SV=3	F	GO:0031625	ubiquitin protein ligase binding
L8HXP8	TPIS_HUMANTriosephosphate isomerase OS=Homo sapiens OX=9606 GN=TPI1 PE=1 SV=3	F	GO:0042803	protein homodimerization activity
L8HXP8	TPIS_HUMANTriosephosphate isomerase OS=Homo sapiens OX=9606 GN=TPI1 PE=1 SV=3	P	GO:0006094	gluconeogenesis
L8HXP8	TPIS_HUMANTriosephosphate isomerase OS=Homo sapiens OX=9606 GN=TPI1 PE=1 SV=3	P	GO:0007275	multicellular organism development
L8HXP8	TPIS_HUMANTriosephosphate isomerase OS=Homo sapiens OX=9606 GN=TPI1 PE=1 SV=3	P	GO:0019242	methylglyoxal biosynthetic process
L8HXP8	TPIS_HUMANTriosephosphate isomerase OS=Homo sapiens OX=9606 GN=TPI1 PE=1 SV=3	P	GO:0019563	glycerol catabolic process
L8HXP8	TPIS_HUMANTriosephosphate isomerase OS=Homo sapiens OX=9606 GN=TPI1 PE=1 SV=3	P	GO:0046166	glyceraldehyde-3-phosphate biosynthetic process
L8HXP8	TPIS_HUMANTriosephosphate isomerase OS=Homo sapiens OX=9606 GN=TPI1 PE=1 SV=3	P	GO:0061621	canonical glycolysis
L8HXP8	TPIS_HUMANTriosephosphate isomerase OS=Homo sapiens OX=9606 GN=TPI1 PE=1 SV=3	P	GO:0006000	fructose metabolic process
L8HXP8	TPIS_HUMANTriosephosphate isomerase OS=Homo sapiens OX=9606 GN=TPI1 PE=1 SV=3	P	GO:0006013	mannose metabolic process
L8HXP8	TPIS_HUMANTriosephosphate isomerase OS=Homo sapiens OX=9606 GN=TPI1 PE=1 SV=3	P	GO:0006020	inositol metabolic process
L8HXP8	TPIS_HUMANTriosephosphate isomerase OS=Homo sapiens OX=9606 GN=TPI1 PE=1 SV=3	P	GO:0015976	carbon utilization
L8HXP8	TPIS_HUMANTriosephosphate isomerase OS=Homo sapiens OX=9606 GN=TPI1 PE=1 SV=3	P	GO:0046486	glycerolipid metabolic process
L8J0P6	FUCO2_HUMANPlasma alpha-L-fucosidase OS=Homo sapiens OX=9606 GN=FUCA2 PE=1 SV=2	C	GO:0005615	extracellular space
L8J0P6	FUCO2_HUMANPlasma alpha-L-fucosidase OS=Homo sapiens OX=9606 GN=FUCA2 PE=1 SV=2	C	GO:0005788	endoplasmic reticulum lumen
L8J0P6	FUCO2_HUMANPlasma alpha-L-fucosidase OS=Homo sapiens OX=9606 GN=FUCA2 PE=1 SV=2	C	GO:0035578	azurophil granule lumen
L8J0P6	FUCO2_HUMANPlasma alpha-L-fucosidase OS=Homo sapiens OX=9606 GN=FUCA2 PE=1 SV=2	F	GO:0004560	alpha-L-fucosidase activity
L8J0P6	FUCO2_HUMANPlasma alpha-L-fucosidase OS=Homo sapiens OX=9606 GN=FUCA2 PE=1 SV=2	F	GO:0005515	protein binding
L8J0P6	FUCO2_HUMANPlasma alpha-L-fucosidase OS=Homo sapiens OX=9606 GN=FUCA2 PE=1 SV=2	F	GO:0030246	carbohydrate binding
L8J0P6	FUCO2_HUMANPlasma alpha-L-fucosidase OS=Homo sapiens OX=9606 GN=FUCA2 PE=1 SV=2	P	GO:0006004	fucose metabolic process
L8J0P6	FUCO2_HUMANPlasma alpha-L-fucosidase OS=Homo sapiens OX=9606 GN=FUCA2 PE=1 SV=2	P	GO:0009617	response to bacterium
L8J0P6	FUCO2_HUMANPlasma alpha-L-fucosidase OS=Homo sapiens OX=9606 GN=FUCA2 PE=1 SV=2	P	GO:0016139	glycoside catabolic process
L8J0P6	FUCO2_HUMANPlasma alpha-L-fucosidase OS=Homo sapiens OX=9606 GN=FUCA2 PE=1 SV=2	P	GO:0019377	glycolipid catabolic process
L8J0P6	FUCO2_HUMANPlasma alpha-L-fucosidase OS=Homo sapiens OX=9606 GN=FUCA2 PE=1 SV=2	P	GO:0043312	neutrophil degranulation
L8J0P6	FUCO2_HUMANPlasma alpha-L-fucosidase OS=Homo sapiens OX=9606 GN=FUCA2 PE=1 SV=2	P	GO:0043687	post-translational protein modification
L8J0P6	FUCO2_HUMANPlasma alpha-L-fucosidase OS=Homo sapiens OX=9606 GN=FUCA2 PE=1 SV=2	P	GO:2000535	regulation of entry of bacterium into host cell
L8IX25	F12AI_BOVINFactor XIIa inhibitor OS=Bos taurus OX=9913 PE=1 SV=1	C	GO:0005615	extracellular space
L8IX25	F12AI_BOVINFactor XIIa inhibitor OS=Bos taurus OX=9913 PE=1 SV=1	C	GO:0044464	cell part
L8IX25	F12AI_BOVINFactor XIIa inhibitor OS=Bos taurus OX=9913 PE=1 SV=1	F	GO:0004867	serine-type endopeptidase inhibitor activity
L8IX25	F12AI_BOVINFactor XIIa inhibitor OS=Bos taurus OX=9913 PE=1 SV=1	P	GO:0001869	negative regulation of complement activation, lectin pathway
L8IX25	F12AI_BOVINFactor XIIa inhibitor OS=Bos taurus OX=9913 PE=1 SV=1	P	GO:0002576	platelet degranulation
L8IX25	F12AI_BOVINFactor XIIa inhibitor OS=Bos taurus OX=9913 PE=1 SV=1	P	GO:0006958	complement activation, classical pathway
L8IX25	F12AI_BOVINFactor XIIa inhibitor OS=Bos taurus OX=9913 PE=1 SV=1	P	GO:0007568	aging
L8IX25	F12AI_BOVINFactor XIIa inhibitor OS=Bos taurus OX=9913 PE=1 SV=1	P	GO:0007597	blood coagulation, intrinsic pathway
L8IX25	F12AI_BOVINFactor XIIa inhibitor OS=Bos taurus OX=9913 PE=1 SV=1	P	GO:0009891	positive regulation of biosynthetic process
L8IX25	F12AI_BOVINFactor XIIa inhibitor OS=Bos taurus OX=9913 PE=1 SV=1	P	GO:0010468	regulation of gene expression
L8IX25	F12AI_BOVINFactor XIIa inhibitor OS=Bos taurus OX=9913 PE=1 SV=1	P	GO:0010604	positive regulation of macromolecule metabolic process
L8IX25	F12AI_BOVINFactor XIIa inhibitor OS=Bos taurus OX=9913 PE=1 SV=1	P	GO:0010951	negative regulation of endopeptidase activity
L8IX25	F12AI_BOVINFactor XIIa inhibitor OS=Bos taurus OX=9913 PE=1 SV=1	P	GO:0031325	positive regulation of cellular metabolic process
L8IX25	F12AI_BOVINFactor XIIa inhibitor OS=Bos taurus OX=9913 PE=1 SV=1	P	GO:0042730	fibrinolysis
L8IX25	F12AI_BOVINFactor XIIa inhibitor OS=Bos taurus OX=9913 PE=1 SV=1	P	GO:0051173	positive regulation of nitrogen compound metabolic process
L8IX25	F12AI_BOVINFactor XIIa inhibitor OS=Bos taurus OX=9913 PE=1 SV=1	P	GO:0051240	positive regulation of multicellular organismal process
L8I9A3	PPT2_BOVINLysosomal thioesterase PPT2 OS=Bos taurus OX=9913 GN=PPT2 PE=2 SV=1	C	GO:0005576	extracellular region
L8I9A3	PPT2_BOVINLysosomal thioesterase PPT2 OS=Bos taurus OX=9913 GN=PPT2 PE=2 SV=1	C	GO:0043005	neuron projection
L8I9A3	PPT2_BOVINLysosomal thioesterase PPT2 OS=Bos taurus OX=9913 GN=PPT2 PE=2 SV=1	C	GO:0043202	lysosomal lumen
L8I9A3	PPT2_BOVINLysosomal thioesterase PPT2 OS=Bos taurus OX=9913 GN=PPT2 PE=2 SV=1	F	GO:0008474	palmitoyl-(protein) hydrolase activity
L8I9A3	PPT2_BOVINLysosomal thioesterase PPT2 OS=Bos taurus OX=9913 GN=PPT2 PE=2 SV=1	P	GO:0006810	transport
L8I9A3	PPT2_BOVINLysosomal thioesterase PPT2 OS=Bos taurus OX=9913 GN=PPT2 PE=2 SV=1	P	GO:0007399	nervous system development
L8I9A3	PPT2_BOVINLysosomal thioesterase PPT2 OS=Bos taurus OX=9913 GN=PPT2 PE=2 SV=1	P	GO:0007610	behavior
L8I9A3	PPT2_BOVINLysosomal thioesterase PPT2 OS=Bos taurus OX=9913 GN=PPT2 PE=2 SV=1	P	GO:0030163	protein catabolic process
L8I9A3	PPT2_BOVINLysosomal thioesterase PPT2 OS=Bos taurus OX=9913 GN=PPT2 PE=2 SV=1	P	GO:0046949	fatty-acyl-CoA biosynthetic process
L8I9A3	PPT2_BOVINLysosomal thioesterase PPT2 OS=Bos taurus OX=9913 GN=PPT2 PE=2 SV=1	P	GO:0048523	negative regulation of cellular process
L8I9A3	PPT2_BOVINLysosomal thioesterase PPT2 OS=Bos taurus OX=9913 GN=PPT2 PE=2 SV=1	P	GO:0051128	regulation of cellular component organization
L8I9A3	PPT2_BOVINLysosomal thioesterase PPT2 OS=Bos taurus OX=9913 GN=PPT2 PE=2 SV=1	P	GO:0065008	regulation of biological quality
L8I9A3	PPT2_BOVINLysosomal thioesterase PPT2 OS=Bos taurus OX=9913 GN=PPT2 PE=2 SV=1	P	GO:0098734	macromolecule depalmitoylation
L8I9A3	PPT2_BOVINLysosomal thioesterase PPT2 OS=Bos taurus OX=9913 GN=PPT2 PE=2 SV=1	P	GO:0006464	cellular protein modification process
L8HQI2	ADIPO_BOVINAdiponectin OS=Bos taurus OX=9913 GN=ADIPOQ PE=1 SV=1	C	GO:0005581	collagen trimer
L8HQI2	ADIPO_BOVINAdiponectin OS=Bos taurus OX=9913 GN=ADIPOQ PE=1 SV=1	C	GO:0005615	extracellular space
L8HQI2	ADIPO_BOVINAdiponectin OS=Bos taurus OX=9913 GN=ADIPOQ PE=1 SV=1	C	GO:0005783	endoplasmic reticulum
L8HQI2	ADIPO_BOVINAdiponectin OS=Bos taurus OX=9913 GN=ADIPOQ PE=1 SV=1	C	GO:0009986	cell surface
L8HQI2	ADIPO_BOVINAdiponectin OS=Bos taurus OX=9913 GN=ADIPOQ PE=1 SV=1	C	GO:0048471	perinuclear region of cytoplasm
L8HQI2	ADIPO_BOVINAdiponectin OS=Bos taurus OX=9913 GN=ADIPOQ PE=1 SV=1	C	GO:0071944	cell periphery
L8HQI2	ADIPO_BOVINAdiponectin OS=Bos taurus OX=9913 GN=ADIPOQ PE=1 SV=1	F	GO:0005179	hormone activity
L8HQI2	ADIPO_BOVINAdiponectin OS=Bos taurus OX=9913 GN=ADIPOQ PE=1 SV=1	F	GO:0005201	extracellular matrix structural constituent
L8HQI2	ADIPO_BOVINAdiponectin OS=Bos taurus OX=9913 GN=ADIPOQ PE=1 SV=1	F	GO:0005509	calcium ion binding
L8HQI2	ADIPO_BOVINAdiponectin OS=Bos taurus OX=9913 GN=ADIPOQ PE=1 SV=1	F	GO:0033691	sialic acid binding
L8HQI2	ADIPO_BOVINAdiponectin OS=Bos taurus OX=9913 GN=ADIPOQ PE=1 SV=1	F	GO:0042803	protein homodimerization activity
L8HQI2	ADIPO_BOVINAdiponectin OS=Bos taurus OX=9913 GN=ADIPOQ PE=1 SV=1	P	GO:0001666	response to hypoxia
L8HQI2	ADIPO_BOVINAdiponectin OS=Bos taurus OX=9913 GN=ADIPOQ PE=1 SV=1	P	GO:0006635	fatty acid beta-oxidation
L8HQI2	ADIPO_BOVINAdiponectin OS=Bos taurus OX=9913 GN=ADIPOQ PE=1 SV=1	P	GO:0007584	response to nutrient
L8HQI2	ADIPO_BOVINAdiponectin OS=Bos taurus OX=9913 GN=ADIPOQ PE=1 SV=1	P	GO:0007623	circadian rhythm
L8HQI2	ADIPO_BOVINAdiponectin OS=Bos taurus OX=9913 GN=ADIPOQ PE=1 SV=1	P	GO:0009617	response to bacterium
L8HQI2	ADIPO_BOVINAdiponectin OS=Bos taurus OX=9913 GN=ADIPOQ PE=1 SV=1	P	GO:0009744	response to sucrose
L8HQI2	ADIPO_BOVINAdiponectin OS=Bos taurus OX=9913 GN=ADIPOQ PE=1 SV=1	P	GO:0009749	response to glucose
L8HQI2	ADIPO_BOVINAdiponectin OS=Bos taurus OX=9913 GN=ADIPOQ PE=1 SV=1	P	GO:0010739	positive regulation of protein kinase A signaling
L8HQI2	ADIPO_BOVINAdiponectin OS=Bos taurus OX=9913 GN=ADIPOQ PE=1 SV=1	P	GO:0010745	negative regulation of macrophage derived foam cell differentiation
L8HQI2	ADIPO_BOVINAdiponectin OS=Bos taurus OX=9913 GN=ADIPOQ PE=1 SV=1	P	GO:0010804	negative regulation of tumor necrosis factor-mediated signaling pathway
L8HQI2	ADIPO_BOVINAdiponectin OS=Bos taurus OX=9913 GN=ADIPOQ PE=1 SV=1	P	GO:0010875	positive regulation of cholesterol efflux
L8HQI2	ADIPO_BOVINAdiponectin OS=Bos taurus OX=9913 GN=ADIPOQ PE=1 SV=1	P	GO:0014823	response to activity
L8HQI2	ADIPO_BOVINAdiponectin OS=Bos taurus OX=9913 GN=ADIPOQ PE=1 SV=1	P	GO:0030853	negative regulation of granulocyte differentiation
L8HQI2	ADIPO_BOVINAdiponectin OS=Bos taurus OX=9913 GN=ADIPOQ PE=1 SV=1	P	GO:0031953	negative regulation of protein autophosphorylation
L8HQI2	ADIPO_BOVINAdiponectin OS=Bos taurus OX=9913 GN=ADIPOQ PE=1 SV=1	P	GO:0032720	negative regulation of tumor necrosis factor production
L8HQI2	ADIPO_BOVINAdiponectin OS=Bos taurus OX=9913 GN=ADIPOQ PE=1 SV=1	P	GO:0032757	positive regulation of interleukin-8 production
L8HQI2	ADIPO_BOVINAdiponectin OS=Bos taurus OX=9913 GN=ADIPOQ PE=1 SV=1	P	GO:0033034	positive regulation of myeloid cell apoptotic process
L8HQI2	ADIPO_BOVINAdiponectin OS=Bos taurus OX=9913 GN=ADIPOQ PE=1 SV=1	P	GO:0034115	negative regulation of heterotypic cell-cell adhesion
L8HQI2	ADIPO_BOVINAdiponectin OS=Bos taurus OX=9913 GN=ADIPOQ PE=1 SV=1	P	GO:0034383	low-density lipoprotein particle clearance
L8HQI2	ADIPO_BOVINAdiponectin OS=Bos taurus OX=9913 GN=ADIPOQ PE=1 SV=1	P	GO:0035690	cellular response to drug
L8HQI2	ADIPO_BOVINAdiponectin OS=Bos taurus OX=9913 GN=ADIPOQ PE=1 SV=1	P	GO:0042304	regulation of fatty acid biosynthetic process
L8HQI2	ADIPO_BOVINAdiponectin OS=Bos taurus OX=9913 GN=ADIPOQ PE=1 SV=1	P	GO:0042593	glucose homeostasis
L8HQI2	ADIPO_BOVINAdiponectin OS=Bos taurus OX=9913 GN=ADIPOQ PE=1 SV=1	P	GO:0043123	positive regulation of I-kappaB kinase/NF-kappaB signaling
L8HQI2	ADIPO_BOVINAdiponectin OS=Bos taurus OX=9913 GN=ADIPOQ PE=1 SV=1	P	GO:0043124	negative regulation of I-kappaB kinase/NF-kappaB signaling
L8HQI2	ADIPO_BOVINAdiponectin OS=Bos taurus OX=9913 GN=ADIPOQ PE=1 SV=1	P	GO:0043407	negative regulation of MAP kinase activity
L8HQI2	ADIPO_BOVINAdiponectin OS=Bos taurus OX=9913 GN=ADIPOQ PE=1 SV=1	P	GO:0045299	otolith mineralization
L8HQI2	ADIPO_BOVINAdiponectin OS=Bos taurus OX=9913 GN=ADIPOQ PE=1 SV=1	P	GO:0045471	response to ethanol
L8HQI2	ADIPO_BOVINAdiponectin OS=Bos taurus OX=9913 GN=ADIPOQ PE=1 SV=1	P	GO:0045599	negative regulation of fat cell differentiation
L8HQI2	ADIPO_BOVINAdiponectin OS=Bos taurus OX=9913 GN=ADIPOQ PE=1 SV=1	P	GO:0045650	negative regulation of macrophage differentiation
L8HQI2	ADIPO_BOVINAdiponectin OS=Bos taurus OX=9913 GN=ADIPOQ PE=1 SV=1	P	GO:0045715	negative regulation of low-density lipoprotein particle receptor biosynthetic process
L8HQI2	ADIPO_BOVINAdiponectin OS=Bos taurus OX=9913 GN=ADIPOQ PE=1 SV=1	P	GO:0045721	negative regulation of gluconeogenesis
L8HQI2	ADIPO_BOVINAdiponectin OS=Bos taurus OX=9913 GN=ADIPOQ PE=1 SV=1	P	GO:0045776	negative regulation of blood pressure
L8HQI2	ADIPO_BOVINAdiponectin OS=Bos taurus OX=9913 GN=ADIPOQ PE=1 SV=1	P	GO:0045792	negative regulation of cell size
L8HQI2	ADIPO_BOVINAdiponectin OS=Bos taurus OX=9913 GN=ADIPOQ PE=1 SV=1	P	GO:0045892	negative regulation of transcription, DNA-templated
L8HQI2	ADIPO_BOVINAdiponectin OS=Bos taurus OX=9913 GN=ADIPOQ PE=1 SV=1	P	GO:0045923	positive regulation of fatty acid metabolic process
L8HQI2	ADIPO_BOVINAdiponectin OS=Bos taurus OX=9913 GN=ADIPOQ PE=1 SV=1	P	GO:0046326	positive regulation of glucose import
L8HQI2	ADIPO_BOVINAdiponectin OS=Bos taurus OX=9913 GN=ADIPOQ PE=1 SV=1	P	GO:0046888	negative regulation of hormone secretion
L8HQI2	ADIPO_BOVINAdiponectin OS=Bos taurus OX=9913 GN=ADIPOQ PE=1 SV=1	P	GO:0050728	negative regulation of inflammatory response
L8HQI2	ADIPO_BOVINAdiponectin OS=Bos taurus OX=9913 GN=ADIPOQ PE=1 SV=1	P	GO:0050731	positive regulation of peptidyl-tyrosine phosphorylation
L8HQI2	ADIPO_BOVINAdiponectin OS=Bos taurus OX=9913 GN=ADIPOQ PE=1 SV=1	P	GO:0050765	negative regulation of phagocytosis
L8HQI2	ADIPO_BOVINAdiponectin OS=Bos taurus OX=9913 GN=ADIPOQ PE=1 SV=1	P	GO:0050805	negative regulation of synaptic transmission
L8HQI2	ADIPO_BOVINAdiponectin OS=Bos taurus OX=9913 GN=ADIPOQ PE=1 SV=1	P	GO:0050873	brown fat cell differentiation
L8HQI2	ADIPO_BOVINAdiponectin OS=Bos taurus OX=9913 GN=ADIPOQ PE=1 SV=1	P	GO:0051260	protein homooligomerization
L8HQI2	ADIPO_BOVINAdiponectin OS=Bos taurus OX=9913 GN=ADIPOQ PE=1 SV=1	P	GO:0051384	response to glucocorticoid
L8HQI2	ADIPO_BOVINAdiponectin OS=Bos taurus OX=9913 GN=ADIPOQ PE=1 SV=1	P	GO:0070373	negative regulation of ERK1 and ERK2 cascade
L8HQI2	ADIPO_BOVINAdiponectin OS=Bos taurus OX=9913 GN=ADIPOQ PE=1 SV=1	P	GO:0070543	response to linoleic acid
L8HQI2	ADIPO_BOVINAdiponectin OS=Bos taurus OX=9913 GN=ADIPOQ PE=1 SV=1	P	GO:0070994	detection of oxidative stress
L8HQI2	ADIPO_BOVINAdiponectin OS=Bos taurus OX=9913 GN=ADIPOQ PE=1 SV=1	P	GO:0071320	cellular response to cAMP
L8HQI2	ADIPO_BOVINAdiponectin OS=Bos taurus OX=9913 GN=ADIPOQ PE=1 SV=1	P	GO:0071639	positive regulation of monocyte chemotactic protein-1 production
L8HQI2	ADIPO_BOVINAdiponectin OS=Bos taurus OX=9913 GN=ADIPOQ PE=1 SV=1	P	GO:0071872	cellular response to epinephrine stimulus
L8HQI2	ADIPO_BOVINAdiponectin OS=Bos taurus OX=9913 GN=ADIPOQ PE=1 SV=1	P	GO:0072659	protein localization to plasma membrane
L8HQI2	ADIPO_BOVINAdiponectin OS=Bos taurus OX=9913 GN=ADIPOQ PE=1 SV=1	P	GO:0090317	negative regulation of intracellular protein transport
L8HQI2	ADIPO_BOVINAdiponectin OS=Bos taurus OX=9913 GN=ADIPOQ PE=1 SV=1	P	GO:0097009	energy homeostasis
L8HQI2	ADIPO_BOVINAdiponectin OS=Bos taurus OX=9913 GN=ADIPOQ PE=1 SV=1	P	GO:0120162	positive regulation of cold-induced thermogenesis
L8HQI2	ADIPO_BOVINAdiponectin OS=Bos taurus OX=9913 GN=ADIPOQ PE=1 SV=1	P	GO:0120163	negative regulation of cold-induced thermogenesis
L8HQI2	ADIPO_BOVINAdiponectin OS=Bos taurus OX=9913 GN=ADIPOQ PE=1 SV=1	P	GO:1900078	positive regulation of cellular response to insulin stimulus
L8HQI2	ADIPO_BOVINAdiponectin OS=Bos taurus OX=9913 GN=ADIPOQ PE=1 SV=1	P	GO:1900121	negative regulation of receptor binding
L8HQI2	ADIPO_BOVINAdiponectin OS=Bos taurus OX=9913 GN=ADIPOQ PE=1 SV=1	P	GO:1904706	negative regulation of vascular smooth muscle cell proliferation
L8HQI2	ADIPO_BOVINAdiponectin OS=Bos taurus OX=9913 GN=ADIPOQ PE=1 SV=1	P	GO:1904753	negative regulation of vascular associated smooth muscle cell migration
L8HQI2	ADIPO_BOVINAdiponectin OS=Bos taurus OX=9913 GN=ADIPOQ PE=1 SV=1	P	GO:2000279	negative regulation of DNA biosynthetic process
L8HQI2	ADIPO_BOVINAdiponectin OS=Bos taurus OX=9913 GN=ADIPOQ PE=1 SV=1	P	GO:2000467	positive regulation of glycogen (starch) synthase activity
L8HQI2	ADIPO_BOVINAdiponectin OS=Bos taurus OX=9913 GN=ADIPOQ PE=1 SV=1	P	GO:2000478	positive regulation of metanephric glomerular visceral epithelial cell development
L8HQI2	ADIPO_BOVINAdiponectin OS=Bos taurus OX=9913 GN=ADIPOQ PE=1 SV=1	P	GO:2000481	positive regulation of cAMP-dependent protein kinase activity
L8HQI2	ADIPO_BOVINAdiponectin OS=Bos taurus OX=9913 GN=ADIPOQ PE=1 SV=1	P	GO:2000534	positive regulation of renal albumin absorption
L8HQI2	ADIPO_BOVINAdiponectin OS=Bos taurus OX=9913 GN=ADIPOQ PE=1 SV=1	P	GO:2000584	negative regulation of platelet-derived growth factor receptor-alpha signaling pathway
L8HQI2	ADIPO_BOVINAdiponectin OS=Bos taurus OX=9913 GN=ADIPOQ PE=1 SV=1	P	GO:2000590	negative regulation of metanephric mesenchymal cell migration
L8HQI2	ADIPO_BOVINAdiponectin OS=Bos taurus OX=9913 GN=ADIPOQ PE=1 SV=1	C	GO:0005578	extracellular matrix
L8IK42	ITIH4_BOVINInter-alpha-trypsin inhibitor heavy chain H4 OS=Bos taurus OX=9913 GN=ITIH4 PE=1 SV=1	C	GO:0005576	extracellular region
L8IK42	ITIH4_BOVINInter-alpha-trypsin inhibitor heavy chain H4 OS=Bos taurus OX=9913 GN=ITIH4 PE=1 SV=1	C	GO:0005886	plasma membrane
L8IK42	ITIH4_BOVINInter-alpha-trypsin inhibitor heavy chain H4 OS=Bos taurus OX=9913 GN=ITIH4 PE=1 SV=1	C	GO:0031089	platelet dense granule lumen
L8IK42	ITIH4_BOVINInter-alpha-trypsin inhibitor heavy chain H4 OS=Bos taurus OX=9913 GN=ITIH4 PE=1 SV=1	F	GO:0004867	serine-type endopeptidase inhibitor activity
L8IK42	ITIH4_BOVINInter-alpha-trypsin inhibitor heavy chain H4 OS=Bos taurus OX=9913 GN=ITIH4 PE=1 SV=1	F	GO:0005515	protein binding
L8IK42	ITIH4_BOVINInter-alpha-trypsin inhibitor heavy chain H4 OS=Bos taurus OX=9913 GN=ITIH4 PE=1 SV=1	F	GO:0005540	hyaluronic acid binding
L8IK42	ITIH4_BOVINInter-alpha-trypsin inhibitor heavy chain H4 OS=Bos taurus OX=9913 GN=ITIH4 PE=1 SV=1	P	GO:0002576	platelet degranulation
L8IK42	ITIH4_BOVINInter-alpha-trypsin inhibitor heavy chain H4 OS=Bos taurus OX=9913 GN=ITIH4 PE=1 SV=1	P	GO:0006953	acute-phase response
L8IK42	ITIH4_BOVINInter-alpha-trypsin inhibitor heavy chain H4 OS=Bos taurus OX=9913 GN=ITIH4 PE=1 SV=1	P	GO:0010951	negative regulation of endopeptidase activity
L8IK42	ITIH4_BOVINInter-alpha-trypsin inhibitor heavy chain H4 OS=Bos taurus OX=9913 GN=ITIH4 PE=1 SV=1	P	GO:0030212	hyaluronan metabolic process
L8IK42	ITIH4_BOVINInter-alpha-trypsin inhibitor heavy chain H4 OS=Bos taurus OX=9913 GN=ITIH4 PE=1 SV=1	P	GO:0034097	response to cytokine
L8J052	VNN1_BOVINPantetheinase OS=Bos taurus OX=9913 GN=VNN1 PE=1 SV=1	C	GO:0005615	extracellular space
L8J052	VNN1_BOVINPantetheinase OS=Bos taurus OX=9913 GN=VNN1 PE=1 SV=1	C	GO:0005886	plasma membrane
L8J052	VNN1_BOVINPantetheinase OS=Bos taurus OX=9913 GN=VNN1 PE=1 SV=1	C	GO:0016021	integral component of membrane
L8J052	VNN1_BOVINPantetheinase OS=Bos taurus OX=9913 GN=VNN1 PE=1 SV=1	C	GO:0031225	anchored component of membrane
L8J052	VNN1_BOVINPantetheinase OS=Bos taurus OX=9913 GN=VNN1 PE=1 SV=1	C	GO:0035577	azurophil granule membrane
L8J052	VNN1_BOVINPantetheinase OS=Bos taurus OX=9913 GN=VNN1 PE=1 SV=1	F	GO:0017159	pantetheine hydrolase activity
L8J052	VNN1_BOVINPantetheinase OS=Bos taurus OX=9913 GN=VNN1 PE=1 SV=1	F	GO:0034235	GPI anchor binding
L8J052	VNN1_BOVINPantetheinase OS=Bos taurus OX=9913 GN=VNN1 PE=1 SV=1	P	GO:0002526	acute inflammatory response
L8J052	VNN1_BOVINPantetheinase OS=Bos taurus OX=9913 GN=VNN1 PE=1 SV=1	P	GO:0002544	chronic inflammatory response
L8J052	VNN1_BOVINPantetheinase OS=Bos taurus OX=9913 GN=VNN1 PE=1 SV=1	P	GO:0015939	pantothenate metabolic process
L8J052	VNN1_BOVINPantetheinase OS=Bos taurus OX=9913 GN=VNN1 PE=1 SV=1	P	GO:0033089	positive regulation of T cell differentiation in thymus
L8J052	VNN1_BOVINPantetheinase OS=Bos taurus OX=9913 GN=VNN1 PE=1 SV=1	P	GO:0043312	neutrophil degranulation
L8J052	VNN1_BOVINPantetheinase OS=Bos taurus OX=9913 GN=VNN1 PE=1 SV=1	P	GO:0045087	innate immune response
L8J052	VNN1_BOVINPantetheinase OS=Bos taurus OX=9913 GN=VNN1 PE=1 SV=1	P	GO:1902176	negative regulation of oxidative stress-induced intrinsic apoptotic signaling pathway
L8IQM1	CREG1_HUMAN CREG1 OS=Homo sapiens OX=9606 GN=CREG1 PE=1 SV=1	C	GO:0005615	extracellular space
L8IQM1	CREG1_HUMAN CREG1 OS=Homo sapiens OX=9606 GN=CREG1 PE=1 SV=1	C	GO:0005667	transcription factor complex
L8IQM1	CREG1_HUMAN CREG1 OS=Homo sapiens OX=9606 GN=CREG1 PE=1 SV=1	C	GO:0005783	endoplasmic reticulum
L8IQM1	CREG1_HUMAN CREG1 OS=Homo sapiens OX=9606 GN=CREG1 PE=1 SV=1	C	GO:0005794	Golgi apparatus
L8IQM1	CREG1_HUMAN CREG1 OS=Homo sapiens OX=9606 GN=CREG1 PE=1 SV=1	C	GO:0035578	azurophil granule lumen
L8IQM1	CREG1_HUMAN CREG1 OS=Homo sapiens OX=9606 GN=CREG1 PE=1 SV=1	F	GO:0003714	transcription corepressor activity
L8IQM1	CREG1_HUMAN CREG1 OS=Homo sapiens OX=9606 GN=CREG1 PE=1 SV=1	F	GO:0008134	transcription factor binding
L8IQM1	CREG1_HUMAN CREG1 OS=Homo sapiens OX=9606 GN=CREG1 PE=1 SV=1	F	GO:0048037	cofactor binding
L8IQM1	CREG1_HUMAN CREG1 OS=Homo sapiens OX=9606 GN=CREG1 PE=1 SV=1	P	GO:0006357	regulation of transcription by RNA polymerase II
L8IQM1	CREG1_HUMAN CREG1 OS=Homo sapiens OX=9606 GN=CREG1 PE=1 SV=1	P	GO:0007275	multicellular organism development
L8IQM1	CREG1_HUMAN CREG1 OS=Homo sapiens OX=9606 GN=CREG1 PE=1 SV=1	P	GO:0040008	regulation of growth
L8IQM1	CREG1_HUMAN CREG1 OS=Homo sapiens OX=9606 GN=CREG1 PE=1 SV=1	P	GO:0043312	neutrophil degranulation
L8IQM1	CREG1_HUMAN CREG1 OS=Homo sapiens OX=9606 GN=CREG1 PE=1 SV=1	P	GO:0016481	negative regulation of transcription, DNA-templated
L8IDW8	ERO1A_BOVINERO1 alpha OS=Bos taurus OX=9913 GN=ERO1A PE=2 SV=1	C	GO:0005788	endoplasmic reticulum lumen
L8IDW8	ERO1A_BOVINERO1 alpha OS=Bos taurus OX=9913 GN=ERO1A PE=2 SV=1	C	GO:0030176	integral component of endoplasmic reticulum membrane
L8IDW8	ERO1A_BOVINERO1 alpha OS=Bos taurus OX=9913 GN=ERO1A PE=2 SV=1	C	GO:0030425	dendrite
L8IDW8	ERO1A_BOVINERO1 alpha OS=Bos taurus OX=9913 GN=ERO1A PE=2 SV=1	F	GO:0003756	protein disulfide isomerase activity
L8IDW8	ERO1A_BOVINERO1 alpha OS=Bos taurus OX=9913 GN=ERO1A PE=2 SV=1	F	GO:0015035	protein disulfide oxidoreductase activity
L8IDW8	ERO1A_BOVINERO1 alpha OS=Bos taurus OX=9913 GN=ERO1A PE=2 SV=1	F	GO:0016671	oxidoreductase activity, acting on a sulfur group of donors, disulfide as acceptor
L8IDW8	ERO1A_BOVINERO1 alpha OS=Bos taurus OX=9913 GN=ERO1A PE=2 SV=1	F	GO:0051082	unfolded protein binding
L8IDW8	ERO1A_BOVINERO1 alpha OS=Bos taurus OX=9913 GN=ERO1A PE=2 SV=1	P	GO:0010260	animal organ senescence
L8IDW8	ERO1A_BOVINERO1 alpha OS=Bos taurus OX=9913 GN=ERO1A PE=2 SV=1	P	GO:0019471	4-hydroxyproline metabolic process
L8IDW8	ERO1A_BOVINERO1 alpha OS=Bos taurus OX=9913 GN=ERO1A PE=2 SV=1	P	GO:0022417	protein maturation by protein folding
L8IDW8	ERO1A_BOVINERO1 alpha OS=Bos taurus OX=9913 GN=ERO1A PE=2 SV=1	P	GO:0030070	insulin processing
L8IDW8	ERO1A_BOVINERO1 alpha OS=Bos taurus OX=9913 GN=ERO1A PE=2 SV=1	P	GO:0030198	extracellular matrix organization
L8IDW8	ERO1A_BOVINERO1 alpha OS=Bos taurus OX=9913 GN=ERO1A PE=2 SV=1	P	GO:0030968	endoplasmic reticulum unfolded protein response
L8IDW8	ERO1A_BOVINERO1 alpha OS=Bos taurus OX=9913 GN=ERO1A PE=2 SV=1	P	GO:0034975	protein folding in endoplasmic reticulum
L8IDW8	ERO1A_BOVINERO1 alpha OS=Bos taurus OX=9913 GN=ERO1A PE=2 SV=1	P	GO:0042593	glucose homeostasis
L8IDW8	ERO1A_BOVINERO1 alpha OS=Bos taurus OX=9913 GN=ERO1A PE=2 SV=1	P	GO:0045454	cell redox homeostasis
L8IDW8	ERO1A_BOVINERO1 alpha OS=Bos taurus OX=9913 GN=ERO1A PE=2 SV=1	P	GO:0050873	brown fat cell differentiation
L8IDW8	ERO1A_BOVINERO1 alpha OS=Bos taurus OX=9913 GN=ERO1A PE=2 SV=1	P	GO:0051085	chaperone cofactor-dependent protein refolding
L8IDW8	ERO1A_BOVINERO1 alpha OS=Bos taurus OX=9913 GN=ERO1A PE=2 SV=1	P	GO:0051209	release of sequestered calcium ion into cytosol
L8IDW8	ERO1A_BOVINERO1 alpha OS=Bos taurus OX=9913 GN=ERO1A PE=2 SV=1	P	GO:0055114	oxidation-reduction process
L8IDW8	ERO1A_BOVINERO1 alpha OS=Bos taurus OX=9913 GN=ERO1A PE=2 SV=1	P	GO:0070059	intrinsic apoptotic signaling pathway in response to endoplasmic reticulum stress
L8IDW8	ERO1A_BOVINERO1 alpha OS=Bos taurus OX=9913 GN=ERO1A PE=2 SV=1	P	GO:0071456	cellular response to hypoxia
L8IDW8	ERO1A_BOVINERO1 alpha OS=Bos taurus OX=9913 GN=ERO1A PE=2 SV=1	P	GO:0006118	obsolete electron transport
L8ILP2	CBG_BOVINCorticosteroid-binding globulin OS=Bos taurus OX=9913 GN=SERPINA6 PE=3 SV=1	C	GO:0005615	extracellular space
L8ILP2	CBG_BOVINCorticosteroid-binding globulin OS=Bos taurus OX=9913 GN=SERPINA6 PE=3 SV=1	F	GO:0004867	serine-type endopeptidase inhibitor activity
L8ILP2	CBG_BOVINCorticosteroid-binding globulin OS=Bos taurus OX=9913 GN=SERPINA6 PE=3 SV=1	F	GO:0005496	steroid binding
L8ILP2	CBG_BOVINCorticosteroid-binding globulin OS=Bos taurus OX=9913 GN=SERPINA6 PE=3 SV=1	P	GO:0008211	glucocorticoid metabolic process
L8ILP2	CBG_BOVINCorticosteroid-binding globulin OS=Bos taurus OX=9913 GN=SERPINA6 PE=3 SV=1	P	GO:0010951	negative regulation of endopeptidase activity
L8HPA3	LOXL1_BOVINLysyl oxidase homolog 1 OS=Bos taurus OX=9913 GN=LOXL1 PE=1 SV=1	C	GO:0005581	collagen trimer
L8HPA3	LOXL1_BOVINLysyl oxidase homolog 1 OS=Bos taurus OX=9913 GN=LOXL1 PE=1 SV=1	C	GO:0005615	extracellular space
L8HPA3	LOXL1_BOVINLysyl oxidase homolog 1 OS=Bos taurus OX=9913 GN=LOXL1 PE=1 SV=1	C	GO:0005634	nucleus
L8HPA3	LOXL1_BOVINLysyl oxidase homolog 1 OS=Bos taurus OX=9913 GN=LOXL1 PE=1 SV=1	C	GO:0005737	cytoplasm
L8HPA3	LOXL1_BOVINLysyl oxidase homolog 1 OS=Bos taurus OX=9913 GN=LOXL1 PE=1 SV=1	C	GO:0031012	extracellular matrix
L8HPA3	LOXL1_BOVINLysyl oxidase homolog 1 OS=Bos taurus OX=9913 GN=LOXL1 PE=1 SV=1	F	GO:0004720	protein-lysine 6-oxidase activity
L8HPA3	LOXL1_BOVINLysyl oxidase homolog 1 OS=Bos taurus OX=9913 GN=LOXL1 PE=1 SV=1	F	GO:0005507	copper ion binding
L8HPA3	LOXL1_BOVINLysyl oxidase homolog 1 OS=Bos taurus OX=9913 GN=LOXL1 PE=1 SV=1	F	GO:0005515	protein binding
L8HPA3	LOXL1_BOVINLysyl oxidase homolog 1 OS=Bos taurus OX=9913 GN=LOXL1 PE=1 SV=1	F	GO:0005518	collagen binding
L8HPA3	LOXL1_BOVINLysyl oxidase homolog 1 OS=Bos taurus OX=9913 GN=LOXL1 PE=1 SV=1	P	GO:0001649	osteoblast differentiation
L8HPA3	LOXL1_BOVINLysyl oxidase homolog 1 OS=Bos taurus OX=9913 GN=LOXL1 PE=1 SV=1	P	GO:0001837	epithelial to mesenchymal transition
L8HPA3	LOXL1_BOVINLysyl oxidase homolog 1 OS=Bos taurus OX=9913 GN=LOXL1 PE=1 SV=1	P	GO:0001932	regulation of protein phosphorylation
L8HPA3	LOXL1_BOVINLysyl oxidase homolog 1 OS=Bos taurus OX=9913 GN=LOXL1 PE=1 SV=1	P	GO:0007507	heart development
L8HPA3	LOXL1_BOVINLysyl oxidase homolog 1 OS=Bos taurus OX=9913 GN=LOXL1 PE=1 SV=1	P	GO:0016202	regulation of striated muscle tissue development
L8HPA3	LOXL1_BOVINLysyl oxidase homolog 1 OS=Bos taurus OX=9913 GN=LOXL1 PE=1 SV=1	P	GO:0017015	regulation of transforming growth factor beta receptor signaling pathway
L8HPA3	LOXL1_BOVINLysyl oxidase homolog 1 OS=Bos taurus OX=9913 GN=LOXL1 PE=1 SV=1	P	GO:0018057	peptidyl-lysine oxidation
L8HPA3	LOXL1_BOVINLysyl oxidase homolog 1 OS=Bos taurus OX=9913 GN=LOXL1 PE=1 SV=1	P	GO:0030199	collagen fibril organization
L8HPA3	LOXL1_BOVINLysyl oxidase homolog 1 OS=Bos taurus OX=9913 GN=LOXL1 PE=1 SV=1	P	GO:0030282	bone mineralization
L8HPA3	LOXL1_BOVINLysyl oxidase homolog 1 OS=Bos taurus OX=9913 GN=LOXL1 PE=1 SV=1	P	GO:0030324	lung development
L8HPA3	LOXL1_BOVINLysyl oxidase homolog 1 OS=Bos taurus OX=9913 GN=LOXL1 PE=1 SV=1	P	GO:0035905	ascending aorta development
L8HPA3	LOXL1_BOVINLysyl oxidase homolog 1 OS=Bos taurus OX=9913 GN=LOXL1 PE=1 SV=1	P	GO:0035906	descending aorta development
L8HPA3	LOXL1_BOVINLysyl oxidase homolog 1 OS=Bos taurus OX=9913 GN=LOXL1 PE=1 SV=1	P	GO:0042060	wound healing
L8HPA3	LOXL1_BOVINLysyl oxidase homolog 1 OS=Bos taurus OX=9913 GN=LOXL1 PE=1 SV=1	P	GO:0042493	response to drug
L8HPA3	LOXL1_BOVINLysyl oxidase homolog 1 OS=Bos taurus OX=9913 GN=LOXL1 PE=1 SV=1	P	GO:0042981	regulation of apoptotic process
L8HPA3	LOXL1_BOVINLysyl oxidase homolog 1 OS=Bos taurus OX=9913 GN=LOXL1 PE=1 SV=1	P	GO:0043491	protein kinase B signaling
L8HPA3	LOXL1_BOVINLysyl oxidase homolog 1 OS=Bos taurus OX=9913 GN=LOXL1 PE=1 SV=1	P	GO:0045652	regulation of megakaryocyte differentiation
L8HPA3	LOXL1_BOVINLysyl oxidase homolog 1 OS=Bos taurus OX=9913 GN=LOXL1 PE=1 SV=1	P	GO:0045892	negative regulation of transcription, DNA-templated
L8HPA3	LOXL1_BOVINLysyl oxidase homolog 1 OS=Bos taurus OX=9913 GN=LOXL1 PE=1 SV=1	P	GO:0046716	muscle cell cellular homeostasis
L8HPA3	LOXL1_BOVINLysyl oxidase homolog 1 OS=Bos taurus OX=9913 GN=LOXL1 PE=1 SV=1	P	GO:0048251	elastic fiber assembly
L8HPA3	LOXL1_BOVINLysyl oxidase homolog 1 OS=Bos taurus OX=9913 GN=LOXL1 PE=1 SV=1	P	GO:0048514	blood vessel morphogenesis
L8HPA3	LOXL1_BOVINLysyl oxidase homolog 1 OS=Bos taurus OX=9913 GN=LOXL1 PE=1 SV=1	P	GO:0048545	response to steroid hormone
L8HPA3	LOXL1_BOVINLysyl oxidase homolog 1 OS=Bos taurus OX=9913 GN=LOXL1 PE=1 SV=1	P	GO:0048747	muscle fiber development
L8HPA3	LOXL1_BOVINLysyl oxidase homolog 1 OS=Bos taurus OX=9913 GN=LOXL1 PE=1 SV=1	P	GO:0060326	cell chemotaxis
L8HPA3	LOXL1_BOVINLysyl oxidase homolog 1 OS=Bos taurus OX=9913 GN=LOXL1 PE=1 SV=1	P	GO:0061448	connective tissue development
L8HPA3	LOXL1_BOVINLysyl oxidase homolog 1 OS=Bos taurus OX=9913 GN=LOXL1 PE=1 SV=1	P	GO:0071897	DNA biosynthetic process
L8HPA3	LOXL1_BOVINLysyl oxidase homolog 1 OS=Bos taurus OX=9913 GN=LOXL1 PE=1 SV=1	P	GO:1900120	regulation of receptor binding
L8HPA3	LOXL1_BOVINLysyl oxidase homolog 1 OS=Bos taurus OX=9913 GN=LOXL1 PE=1 SV=1	P	GO:1903010	regulation of bone development
L8HPA3	LOXL1_BOVINLysyl oxidase homolog 1 OS=Bos taurus OX=9913 GN=LOXL1 PE=1 SV=1	P	GO:1990869	cellular response to chemokine
L8HPA3	LOXL1_BOVINLysyl oxidase homolog 1 OS=Bos taurus OX=9913 GN=LOXL1 PE=1 SV=1	P	GO:2000586	regulation of platelet-derived growth factor receptor-beta signaling pathway
L8IHJ7	CFAI_PONABComplement factor I OS=Pongo abelii OX=9601 GN=CFI PE=2 SV=1	C	GO:0005615	extracellular space
L8IHJ7	CFAI_PONABComplement factor I OS=Pongo abelii OX=9601 GN=CFI PE=2 SV=1	C	GO:0005634	nucleus
L8IHJ7	CFAI_PONABComplement factor I OS=Pongo abelii OX=9601 GN=CFI PE=2 SV=1	C	GO:0044459	plasma membrane part
L8IHJ7	CFAI_PONABComplement factor I OS=Pongo abelii OX=9601 GN=CFI PE=2 SV=1	F	GO:0004252	serine-type endopeptidase activity
L8IHJ7	CFAI_PONABComplement factor I OS=Pongo abelii OX=9601 GN=CFI PE=2 SV=1	F	GO:0005044	scavenger receptor activity
L8IHJ7	CFAI_PONABComplement factor I OS=Pongo abelii OX=9601 GN=CFI PE=2 SV=1	F	GO:0005515	protein binding
L8IHJ7	CFAI_PONABComplement factor I OS=Pongo abelii OX=9601 GN=CFI PE=2 SV=1	P	GO:0006508	proteolysis
L8IHJ7	CFAI_PONABComplement factor I OS=Pongo abelii OX=9601 GN=CFI PE=2 SV=1	P	GO:0030449	regulation of complement activation
L8IHJ7	CFAI_PONABComplement factor I OS=Pongo abelii OX=9601 GN=CFI PE=2 SV=1	P	GO:0030855	epithelial cell differentiation
L8IHJ7	CFAI_PONABComplement factor I OS=Pongo abelii OX=9601 GN=CFI PE=2 SV=1	P	GO:0048513	animal organ development
L8IHJ7	CFAI_PONABComplement factor I OS=Pongo abelii OX=9601 GN=CFI PE=2 SV=1	P	GO:0051179	localization
L8IHJ7	CFAI_PONABComplement factor I OS=Pongo abelii OX=9601 GN=CFI PE=2 SV=1	P	GO:0051704	multi-organism process
L8IHJ7	CFAI_PONABComplement factor I OS=Pongo abelii OX=9601 GN=CFI PE=2 SV=1	P	GO:0071354	cellular response to interleukin-6
L8IHJ7	CFAI_PONABComplement factor I OS=Pongo abelii OX=9601 GN=CFI PE=2 SV=1	P	GO:0007165	signal transduction
L8J332	ASPG_HUMANN(4)-(beta-N-acetylglucosaminyl)-L-asparaginase OS=Homo sapiens OX=9606 GN=AGA PE=1 SV=2	C	GO:0005615	extracellular space
L8J332	ASPG_HUMANN(4)-(beta-N-acetylglucosaminyl)-L-asparaginase OS=Homo sapiens OX=9606 GN=AGA PE=1 SV=2	C	GO:0005783	endoplasmic reticulum
L8J332	ASPG_HUMANN(4)-(beta-N-acetylglucosaminyl)-L-asparaginase OS=Homo sapiens OX=9606 GN=AGA PE=1 SV=2	C	GO:0035578	azurophil granule lumen
L8J332	ASPG_HUMANN(4)-(beta-N-acetylglucosaminyl)-L-asparaginase OS=Homo sapiens OX=9606 GN=AGA PE=1 SV=2	F	GO:0003948	N4-(beta-N-acetylglucosaminyl)-L-asparaginase activity
L8J332	ASPG_HUMANN(4)-(beta-N-acetylglucosaminyl)-L-asparaginase OS=Homo sapiens OX=9606 GN=AGA PE=1 SV=2	F	GO:0008233	peptidase activity
L8J332	ASPG_HUMANN(4)-(beta-N-acetylglucosaminyl)-L-asparaginase OS=Homo sapiens OX=9606 GN=AGA PE=1 SV=2	F	GO:0043621	protein self-association
L8J332	ASPG_HUMANN(4)-(beta-N-acetylglucosaminyl)-L-asparaginase OS=Homo sapiens OX=9606 GN=AGA PE=1 SV=2	P	GO:0006508	proteolysis
L8J332	ASPG_HUMANN(4)-(beta-N-acetylglucosaminyl)-L-asparaginase OS=Homo sapiens OX=9606 GN=AGA PE=1 SV=2	P	GO:0006517	protein deglycosylation
L8J332	ASPG_HUMANN(4)-(beta-N-acetylglucosaminyl)-L-asparaginase OS=Homo sapiens OX=9606 GN=AGA PE=1 SV=2	P	GO:0043312	neutrophil degranulation
L8J332	ASPG_HUMANN(4)-(beta-N-acetylglucosaminyl)-L-asparaginase OS=Homo sapiens OX=9606 GN=AGA PE=1 SV=2	P	GO:0006528	asparagine metabolic process
L8IU68	ANT3_BOVINAntithrombin-III OS=Bos taurus OX=9913 GN=SERPINC1 PE=1 SV=2	C	GO:0005615	extracellular space
L8IU68	ANT3_BOVINAntithrombin-III OS=Bos taurus OX=9913 GN=SERPINC1 PE=1 SV=2	C	GO:0005737	cytoplasm
L8IU68	ANT3_BOVINAntithrombin-III OS=Bos taurus OX=9913 GN=SERPINC1 PE=1 SV=2	C	GO:0005886	plasma membrane
L8IU68	ANT3_BOVINAntithrombin-III OS=Bos taurus OX=9913 GN=SERPINC1 PE=1 SV=2	C	GO:0031982	vesicle
L8IU68	ANT3_BOVINAntithrombin-III OS=Bos taurus OX=9913 GN=SERPINC1 PE=1 SV=2	F	GO:0002020	protease binding
L8IU68	ANT3_BOVINAntithrombin-III OS=Bos taurus OX=9913 GN=SERPINC1 PE=1 SV=2	F	GO:0004867	serine-type endopeptidase inhibitor activity
L8IU68	ANT3_BOVINAntithrombin-III OS=Bos taurus OX=9913 GN=SERPINC1 PE=1 SV=2	F	GO:0008201	heparin binding
L8IU68	ANT3_BOVINAntithrombin-III OS=Bos taurus OX=9913 GN=SERPINC1 PE=1 SV=2	F	GO:0042802	identical protein binding
L8IU68	ANT3_BOVINAntithrombin-III OS=Bos taurus OX=9913 GN=SERPINC1 PE=1 SV=2	P	GO:0002438	acute inflammatory response to antigenic stimulus
L8IU68	ANT3_BOVINAntithrombin-III OS=Bos taurus OX=9913 GN=SERPINC1 PE=1 SV=2	P	GO:0007584	response to nutrient
L8IU68	ANT3_BOVINAntithrombin-III OS=Bos taurus OX=9913 GN=SERPINC1 PE=1 SV=2	P	GO:0007595	lactation
L8IU68	ANT3_BOVINAntithrombin-III OS=Bos taurus OX=9913 GN=SERPINC1 PE=1 SV=2	P	GO:0010951	negative regulation of endopeptidase activity
L8IU68	ANT3_BOVINAntithrombin-III OS=Bos taurus OX=9913 GN=SERPINC1 PE=1 SV=2	P	GO:0019725	cellular homeostasis
L8IU68	ANT3_BOVINAntithrombin-III OS=Bos taurus OX=9913 GN=SERPINC1 PE=1 SV=2	P	GO:0042270	protection from natural killer cell mediated cytotoxicity
L8IU68	ANT3_BOVINAntithrombin-III OS=Bos taurus OX=9913 GN=SERPINC1 PE=1 SV=2	P	GO:0044342	type B pancreatic cell proliferation
L8IU68	ANT3_BOVINAntithrombin-III OS=Bos taurus OX=9913 GN=SERPINC1 PE=1 SV=2	P	GO:2000266	regulation of blood coagulation, intrinsic pathway
L8J0L1	ANLN_HUMANAnillin OS=Homo sapiens OX=9606 GN=ANLN PE=1 SV=2	C	GO:0005654	nucleoplasm
L8J0L1	ANLN_HUMANAnillin OS=Homo sapiens OX=9606 GN=ANLN PE=1 SV=2	C	GO:0005826	actomyosin contractile ring
L8J0L1	ANLN_HUMANAnillin OS=Homo sapiens OX=9606 GN=ANLN PE=1 SV=2	C	GO:0030496	midbody
L8J0L1	ANLN_HUMANAnillin OS=Homo sapiens OX=9606 GN=ANLN PE=1 SV=2	C	GO:0032059	bleb
L8J0L1	ANLN_HUMANAnillin OS=Homo sapiens OX=9606 GN=ANLN PE=1 SV=2	C	GO:0099738	cell cortex region
L8J0L1	ANLN_HUMANAnillin OS=Homo sapiens OX=9606 GN=ANLN PE=1 SV=2	F	GO:0003779	actin binding
L8J0L1	ANLN_HUMANAnillin OS=Homo sapiens OX=9606 GN=ANLN PE=1 SV=2	F	GO:0017049	GTP-Rho binding
L8J0L1	ANLN_HUMANAnillin OS=Homo sapiens OX=9606 GN=ANLN PE=1 SV=2	P	GO:0000915	actomyosin contractile ring assembly
L8J0L1	ANLN_HUMANAnillin OS=Homo sapiens OX=9606 GN=ANLN PE=1 SV=2	P	GO:0000921	septin ring assembly
L8J0L1	ANLN_HUMANAnillin OS=Homo sapiens OX=9606 GN=ANLN PE=1 SV=2	P	GO:0002244	hematopoietic progenitor cell differentiation
L8J0L1	ANLN_HUMANAnillin OS=Homo sapiens OX=9606 GN=ANLN PE=1 SV=2	P	GO:0007096	regulation of exit from mitosis
L8J0L1	ANLN_HUMANAnillin OS=Homo sapiens OX=9606 GN=ANLN PE=1 SV=2	P	GO:0090521	glomerular visceral epithelial cell migration
L8J0L1	ANLN_HUMANAnillin OS=Homo sapiens OX=9606 GN=ANLN PE=1 SV=2	P	GO:1904172	positive regulation of bleb assembly
L8J0L1	ANLN_HUMANAnillin OS=Homo sapiens OX=9606 GN=ANLN PE=1 SV=2	P	GO:1904498	protein localization to mitotic actomyosin contractile ring
L8I793	SMAD2_MOUSEMothers against decapentaplegic homolog 2 OS=Mus musculus OX=10090 GN=Smad2 PE=1 SV=2	C	GO:0000790	nuclear chromatin
L8I793	SMAD2_MOUSEMothers against decapentaplegic homolog 2 OS=Mus musculus OX=10090 GN=Smad2 PE=1 SV=2	C	GO:0005637	nuclear inner membrane
L8I793	SMAD2_MOUSEMothers against decapentaplegic homolog 2 OS=Mus musculus OX=10090 GN=Smad2 PE=1 SV=2	C	GO:0005654	nucleoplasm
L8I793	SMAD2_MOUSEMothers against decapentaplegic homolog 2 OS=Mus musculus OX=10090 GN=Smad2 PE=1 SV=2	C	GO:0005829	cytosol
L8I793	SMAD2_MOUSEMothers against decapentaplegic homolog 2 OS=Mus musculus OX=10090 GN=Smad2 PE=1 SV=2	C	GO:0032444	activin responsive factor complex
L8I793	SMAD2_MOUSEMothers against decapentaplegic homolog 2 OS=Mus musculus OX=10090 GN=Smad2 PE=1 SV=2	C	GO:0043235	receptor complex
L8I793	SMAD2_MOUSEMothers against decapentaplegic homolog 2 OS=Mus musculus OX=10090 GN=Smad2 PE=1 SV=2	C	GO:0071144	heteromeric SMAD protein complex
L8I793	SMAD2_MOUSEMothers against decapentaplegic homolog 2 OS=Mus musculus OX=10090 GN=Smad2 PE=1 SV=2	F	GO:0000978	RNA polymerase II proximal promoter sequence-specific DNA binding
L8I793	SMAD2_MOUSEMothers against decapentaplegic homolog 2 OS=Mus musculus OX=10090 GN=Smad2 PE=1 SV=2	F	GO:0001102	RNA polymerase II activating transcription factor binding
L8I793	SMAD2_MOUSEMothers against decapentaplegic homolog 2 OS=Mus musculus OX=10090 GN=Smad2 PE=1 SV=2	F	GO:0001228	DNA-binding transcription activator activity, RNA polymerase II-specific
L8I793	SMAD2_MOUSEMothers against decapentaplegic homolog 2 OS=Mus musculus OX=10090 GN=Smad2 PE=1 SV=2	F	GO:0003712	transcription coregulator activity
L8I793	SMAD2_MOUSEMothers against decapentaplegic homolog 2 OS=Mus musculus OX=10090 GN=Smad2 PE=1 SV=2	F	GO:0005518	collagen binding
L8I793	SMAD2_MOUSEMothers against decapentaplegic homolog 2 OS=Mus musculus OX=10090 GN=Smad2 PE=1 SV=2	F	GO:0008013	beta-catenin binding
L8I793	SMAD2_MOUSEMothers against decapentaplegic homolog 2 OS=Mus musculus OX=10090 GN=Smad2 PE=1 SV=2	F	GO:0008270	zinc ion binding
L8I793	SMAD2_MOUSEMothers against decapentaplegic homolog 2 OS=Mus musculus OX=10090 GN=Smad2 PE=1 SV=2	F	GO:0017151	DEAD/H-box RNA helicase binding
L8I793	SMAD2_MOUSEMothers against decapentaplegic homolog 2 OS=Mus musculus OX=10090 GN=Smad2 PE=1 SV=2	F	GO:0019901	protein kinase binding
L8I793	SMAD2_MOUSEMothers against decapentaplegic homolog 2 OS=Mus musculus OX=10090 GN=Smad2 PE=1 SV=2	F	GO:0019902	phosphatase binding
L8I793	SMAD2_MOUSEMothers against decapentaplegic homolog 2 OS=Mus musculus OX=10090 GN=Smad2 PE=1 SV=2	F	GO:0030618	transforming growth factor beta receptor, pathway-specific cytoplasmic mediator activity
L8I793	SMAD2_MOUSEMothers against decapentaplegic homolog 2 OS=Mus musculus OX=10090 GN=Smad2 PE=1 SV=2	F	GO:0031490	chromatin DNA binding
L8I793	SMAD2_MOUSEMothers against decapentaplegic homolog 2 OS=Mus musculus OX=10090 GN=Smad2 PE=1 SV=2	F	GO:0031625	ubiquitin protein ligase binding
L8I793	SMAD2_MOUSEMothers against decapentaplegic homolog 2 OS=Mus musculus OX=10090 GN=Smad2 PE=1 SV=2	F	GO:0031962	mineralocorticoid receptor binding
L8I793	SMAD2_MOUSEMothers against decapentaplegic homolog 2 OS=Mus musculus OX=10090 GN=Smad2 PE=1 SV=2	F	GO:0034713	type I transforming growth factor beta receptor binding
L8I793	SMAD2_MOUSEMothers against decapentaplegic homolog 2 OS=Mus musculus OX=10090 GN=Smad2 PE=1 SV=2	F	GO:0035259	glucocorticoid receptor binding
L8I793	SMAD2_MOUSEMothers against decapentaplegic homolog 2 OS=Mus musculus OX=10090 GN=Smad2 PE=1 SV=2	F	GO:0035326	enhancer binding
L8I793	SMAD2_MOUSEMothers against decapentaplegic homolog 2 OS=Mus musculus OX=10090 GN=Smad2 PE=1 SV=2	F	GO:0042803	protein homodimerization activity
L8I793	SMAD2_MOUSEMothers against decapentaplegic homolog 2 OS=Mus musculus OX=10090 GN=Smad2 PE=1 SV=2	F	GO:0043130	ubiquitin binding
L8I793	SMAD2_MOUSEMothers against decapentaplegic homolog 2 OS=Mus musculus OX=10090 GN=Smad2 PE=1 SV=2	F	GO:0043425	bHLH transcription factor binding
L8I793	SMAD2_MOUSEMothers against decapentaplegic homolog 2 OS=Mus musculus OX=10090 GN=Smad2 PE=1 SV=2	F	GO:0048156	tau protein binding
L8I793	SMAD2_MOUSEMothers against decapentaplegic homolog 2 OS=Mus musculus OX=10090 GN=Smad2 PE=1 SV=2	F	GO:0070410	co-SMAD binding
L8I793	SMAD2_MOUSEMothers against decapentaplegic homolog 2 OS=Mus musculus OX=10090 GN=Smad2 PE=1 SV=2	F	GO:0070411	I-SMAD binding
L8I793	SMAD2_MOUSEMothers against decapentaplegic homolog 2 OS=Mus musculus OX=10090 GN=Smad2 PE=1 SV=2	F	GO:0070412	R-SMAD binding
L8I793	SMAD2_MOUSEMothers against decapentaplegic homolog 2 OS=Mus musculus OX=10090 GN=Smad2 PE=1 SV=2	F	GO:0070878	primary miRNA binding
L8I793	SMAD2_MOUSEMothers against decapentaplegic homolog 2 OS=Mus musculus OX=10090 GN=Smad2 PE=1 SV=2	F	GO:0097718	disordered domain specific binding
L8I793	SMAD2_MOUSEMothers against decapentaplegic homolog 2 OS=Mus musculus OX=10090 GN=Smad2 PE=1 SV=2	P	GO:0000122	negative regulation of transcription by RNA polymerase II
L8I793	SMAD2_MOUSEMothers against decapentaplegic homolog 2 OS=Mus musculus OX=10090 GN=Smad2 PE=1 SV=2	P	GO:0001657	ureteric bud development
L8I793	SMAD2_MOUSEMothers against decapentaplegic homolog 2 OS=Mus musculus OX=10090 GN=Smad2 PE=1 SV=2	P	GO:0001666	response to hypoxia
L8I793	SMAD2_MOUSEMothers against decapentaplegic homolog 2 OS=Mus musculus OX=10090 GN=Smad2 PE=1 SV=2	P	GO:0001701	in utero embryonic development
L8I793	SMAD2_MOUSEMothers against decapentaplegic homolog 2 OS=Mus musculus OX=10090 GN=Smad2 PE=1 SV=2	P	GO:0001706	endoderm formation
L8I793	SMAD2_MOUSEMothers against decapentaplegic homolog 2 OS=Mus musculus OX=10090 GN=Smad2 PE=1 SV=2	P	GO:0001707	mesoderm formation
L8I793	SMAD2_MOUSEMothers against decapentaplegic homolog 2 OS=Mus musculus OX=10090 GN=Smad2 PE=1 SV=2	P	GO:0001756	somitogenesis
L8I793	SMAD2_MOUSEMothers against decapentaplegic homolog 2 OS=Mus musculus OX=10090 GN=Smad2 PE=1 SV=2	P	GO:0001889	liver development
L8I793	SMAD2_MOUSEMothers against decapentaplegic homolog 2 OS=Mus musculus OX=10090 GN=Smad2 PE=1 SV=2	P	GO:0001947	heart looping
L8I793	SMAD2_MOUSEMothers against decapentaplegic homolog 2 OS=Mus musculus OX=10090 GN=Smad2 PE=1 SV=2	P	GO:0002076	osteoblast development
L8I793	SMAD2_MOUSEMothers against decapentaplegic homolog 2 OS=Mus musculus OX=10090 GN=Smad2 PE=1 SV=2	P	GO:0002520	immune system development
L8I793	SMAD2_MOUSEMothers against decapentaplegic homolog 2 OS=Mus musculus OX=10090 GN=Smad2 PE=1 SV=2	P	GO:0006919	activation of cysteine-type endopeptidase activity involved in apoptotic process
L8I793	SMAD2_MOUSEMothers against decapentaplegic homolog 2 OS=Mus musculus OX=10090 GN=Smad2 PE=1 SV=2	P	GO:0007050	cell cycle arrest
L8I793	SMAD2_MOUSEMothers against decapentaplegic homolog 2 OS=Mus musculus OX=10090 GN=Smad2 PE=1 SV=2	P	GO:0007182	common-partner SMAD protein phosphorylation
L8I793	SMAD2_MOUSEMothers against decapentaplegic homolog 2 OS=Mus musculus OX=10090 GN=Smad2 PE=1 SV=2	P	GO:0007183	SMAD protein complex assembly
L8I793	SMAD2_MOUSEMothers against decapentaplegic homolog 2 OS=Mus musculus OX=10090 GN=Smad2 PE=1 SV=2	P	GO:0007352	zygotic specification of dorsal/ventral axis
L8I793	SMAD2_MOUSEMothers against decapentaplegic homolog 2 OS=Mus musculus OX=10090 GN=Smad2 PE=1 SV=2	P	GO:0009749	response to glucose
L8I793	SMAD2_MOUSEMothers against decapentaplegic homolog 2 OS=Mus musculus OX=10090 GN=Smad2 PE=1 SV=2	P	GO:0009791	post-embryonic development
L8I793	SMAD2_MOUSEMothers against decapentaplegic homolog 2 OS=Mus musculus OX=10090 GN=Smad2 PE=1 SV=2	P	GO:0010694	positive regulation of alkaline phosphatase activity
L8I793	SMAD2_MOUSEMothers against decapentaplegic homolog 2 OS=Mus musculus OX=10090 GN=Smad2 PE=1 SV=2	P	GO:0010718	positive regulation of epithelial to mesenchymal transition
L8I793	SMAD2_MOUSEMothers against decapentaplegic homolog 2 OS=Mus musculus OX=10090 GN=Smad2 PE=1 SV=2	P	GO:0016202	regulation of striated muscle tissue development
L8I793	SMAD2_MOUSEMothers against decapentaplegic homolog 2 OS=Mus musculus OX=10090 GN=Smad2 PE=1 SV=2	P	GO:0016579	protein deubiquitination
L8I793	SMAD2_MOUSEMothers against decapentaplegic homolog 2 OS=Mus musculus OX=10090 GN=Smad2 PE=1 SV=2	P	GO:0019049	evasion or tolerance of host defenses by virus
L8I793	SMAD2_MOUSEMothers against decapentaplegic homolog 2 OS=Mus musculus OX=10090 GN=Smad2 PE=1 SV=2	P	GO:0023019	signal transduction involved in regulation of gene expression
L8I793	SMAD2_MOUSEMothers against decapentaplegic homolog 2 OS=Mus musculus OX=10090 GN=Smad2 PE=1 SV=2	P	GO:0030073	insulin secretion
L8I793	SMAD2_MOUSEMothers against decapentaplegic homolog 2 OS=Mus musculus OX=10090 GN=Smad2 PE=1 SV=2	P	GO:0030308	negative regulation of cell growth
L8I793	SMAD2_MOUSEMothers against decapentaplegic homolog 2 OS=Mus musculus OX=10090 GN=Smad2 PE=1 SV=2	P	GO:0030324	lung development
L8I793	SMAD2_MOUSEMothers against decapentaplegic homolog 2 OS=Mus musculus OX=10090 GN=Smad2 PE=1 SV=2	P	GO:0030325	adrenal gland development
L8I793	SMAD2_MOUSEMothers against decapentaplegic homolog 2 OS=Mus musculus OX=10090 GN=Smad2 PE=1 SV=2	P	GO:0030335	positive regulation of cell migration
L8I793	SMAD2_MOUSEMothers against decapentaplegic homolog 2 OS=Mus musculus OX=10090 GN=Smad2 PE=1 SV=2	P	GO:0030501	positive regulation of bone mineralization
L8I793	SMAD2_MOUSEMothers against decapentaplegic homolog 2 OS=Mus musculus OX=10090 GN=Smad2 PE=1 SV=2	P	GO:0030512	negative regulation of transforming growth factor beta receptor signaling pathway
L8I793	SMAD2_MOUSEMothers against decapentaplegic homolog 2 OS=Mus musculus OX=10090 GN=Smad2 PE=1 SV=2	P	GO:0030513	positive regulation of BMP signaling pathway
L8I793	SMAD2_MOUSEMothers against decapentaplegic homolog 2 OS=Mus musculus OX=10090 GN=Smad2 PE=1 SV=2	P	GO:0030878	thyroid gland development
L8I793	SMAD2_MOUSEMothers against decapentaplegic homolog 2 OS=Mus musculus OX=10090 GN=Smad2 PE=1 SV=2	P	GO:0031016	pancreas development
L8I793	SMAD2_MOUSEMothers against decapentaplegic homolog 2 OS=Mus musculus OX=10090 GN=Smad2 PE=1 SV=2	P	GO:0031053	primary miRNA processing
L8I793	SMAD2_MOUSEMothers against decapentaplegic homolog 2 OS=Mus musculus OX=10090 GN=Smad2 PE=1 SV=2	P	GO:0032332	positive regulation of chondrocyte differentiation
L8I793	SMAD2_MOUSEMothers against decapentaplegic homolog 2 OS=Mus musculus OX=10090 GN=Smad2 PE=1 SV=2	P	GO:0032731	positive regulation of interleukin-1 beta production
L8I793	SMAD2_MOUSEMothers against decapentaplegic homolog 2 OS=Mus musculus OX=10090 GN=Smad2 PE=1 SV=2	P	GO:0032909	regulation of transforming growth factor beta2 production
L8I793	SMAD2_MOUSEMothers against decapentaplegic homolog 2 OS=Mus musculus OX=10090 GN=Smad2 PE=1 SV=2	P	GO:0032916	positive regulation of transforming growth factor beta3 production
L8I793	SMAD2_MOUSEMothers against decapentaplegic homolog 2 OS=Mus musculus OX=10090 GN=Smad2 PE=1 SV=2	P	GO:0033689	negative regulation of osteoblast proliferation
L8I793	SMAD2_MOUSEMothers against decapentaplegic homolog 2 OS=Mus musculus OX=10090 GN=Smad2 PE=1 SV=2	P	GO:0035019	somatic stem cell population maintenance
L8I793	SMAD2_MOUSEMothers against decapentaplegic homolog 2 OS=Mus musculus OX=10090 GN=Smad2 PE=1 SV=2	P	GO:0035265	organ growth
L8I793	SMAD2_MOUSEMothers against decapentaplegic homolog 2 OS=Mus musculus OX=10090 GN=Smad2 PE=1 SV=2	P	GO:0035556	intracellular signal transduction
L8I793	SMAD2_MOUSEMothers against decapentaplegic homolog 2 OS=Mus musculus OX=10090 GN=Smad2 PE=1 SV=2	P	GO:0042110	T cell activation
L8I793	SMAD2_MOUSEMothers against decapentaplegic homolog 2 OS=Mus musculus OX=10090 GN=Smad2 PE=1 SV=2	P	GO:0042177	negative regulation of protein catabolic process
L8I793	SMAD2_MOUSEMothers against decapentaplegic homolog 2 OS=Mus musculus OX=10090 GN=Smad2 PE=1 SV=2	P	GO:0042307	positive regulation of protein import into nucleus
L8I793	SMAD2_MOUSEMothers against decapentaplegic homolog 2 OS=Mus musculus OX=10090 GN=Smad2 PE=1 SV=2	P	GO:0043066	negative regulation of apoptotic process
L8I793	SMAD2_MOUSEMothers against decapentaplegic homolog 2 OS=Mus musculus OX=10090 GN=Smad2 PE=1 SV=2	P	GO:0045165	cell fate commitment
L8I793	SMAD2_MOUSEMothers against decapentaplegic homolog 2 OS=Mus musculus OX=10090 GN=Smad2 PE=1 SV=2	P	GO:0045216	cell-cell junction organization
L8I793	SMAD2_MOUSEMothers against decapentaplegic homolog 2 OS=Mus musculus OX=10090 GN=Smad2 PE=1 SV=2	P	GO:0045429	positive regulation of nitric oxide biosynthetic process
L8I793	SMAD2_MOUSEMothers against decapentaplegic homolog 2 OS=Mus musculus OX=10090 GN=Smad2 PE=1 SV=2	P	GO:0045599	negative regulation of fat cell differentiation
L8I793	SMAD2_MOUSEMothers against decapentaplegic homolog 2 OS=Mus musculus OX=10090 GN=Smad2 PE=1 SV=2	P	GO:0045668	negative regulation of osteoblast differentiation
L8I793	SMAD2_MOUSEMothers against decapentaplegic homolog 2 OS=Mus musculus OX=10090 GN=Smad2 PE=1 SV=2	P	GO:0045930	negative regulation of mitotic cell cycle
L8I793	SMAD2_MOUSEMothers against decapentaplegic homolog 2 OS=Mus musculus OX=10090 GN=Smad2 PE=1 SV=2	P	GO:0048340	paraxial mesoderm morphogenesis
L8I793	SMAD2_MOUSEMothers against decapentaplegic homolog 2 OS=Mus musculus OX=10090 GN=Smad2 PE=1 SV=2	P	GO:0048617	embryonic foregut morphogenesis
L8I793	SMAD2_MOUSEMothers against decapentaplegic homolog 2 OS=Mus musculus OX=10090 GN=Smad2 PE=1 SV=2	P	GO:0048701	embryonic cranial skeleton morphogenesis
L8I793	SMAD2_MOUSEMothers against decapentaplegic homolog 2 OS=Mus musculus OX=10090 GN=Smad2 PE=1 SV=2	P	GO:0050678	regulation of epithelial cell proliferation
L8I793	SMAD2_MOUSEMothers against decapentaplegic homolog 2 OS=Mus musculus OX=10090 GN=Smad2 PE=1 SV=2	P	GO:0050728	negative regulation of inflammatory response
L8I793	SMAD2_MOUSEMothers against decapentaplegic homolog 2 OS=Mus musculus OX=10090 GN=Smad2 PE=1 SV=2	P	GO:0050776	regulation of immune response
L8I793	SMAD2_MOUSEMothers against decapentaplegic homolog 2 OS=Mus musculus OX=10090 GN=Smad2 PE=1 SV=2	P	GO:0050821	protein stabilization
L8I793	SMAD2_MOUSEMothers against decapentaplegic homolog 2 OS=Mus musculus OX=10090 GN=Smad2 PE=1 SV=2	P	GO:0050927	positive regulation of positive chemotaxis
L8I793	SMAD2_MOUSEMothers against decapentaplegic homolog 2 OS=Mus musculus OX=10090 GN=Smad2 PE=1 SV=2	P	GO:0051091	positive regulation of DNA-binding transcription factor activity
L8I793	SMAD2_MOUSEMothers against decapentaplegic homolog 2 OS=Mus musculus OX=10090 GN=Smad2 PE=1 SV=2	P	GO:0051098	regulation of binding
L8I793	SMAD2_MOUSEMothers against decapentaplegic homolog 2 OS=Mus musculus OX=10090 GN=Smad2 PE=1 SV=2	P	GO:0051481	negative regulation of cytosolic calcium ion concentration
L8I793	SMAD2_MOUSEMothers against decapentaplegic homolog 2 OS=Mus musculus OX=10090 GN=Smad2 PE=1 SV=2	P	GO:0051496	positive regulation of stress fiber assembly
L8I793	SMAD2_MOUSEMothers against decapentaplegic homolog 2 OS=Mus musculus OX=10090 GN=Smad2 PE=1 SV=2	P	GO:0051894	positive regulation of focal adhesion assembly
L8I793	SMAD2_MOUSEMothers against decapentaplegic homolog 2 OS=Mus musculus OX=10090 GN=Smad2 PE=1 SV=2	P	GO:0060039	pericardium development
L8I793	SMAD2_MOUSEMothers against decapentaplegic homolog 2 OS=Mus musculus OX=10090 GN=Smad2 PE=1 SV=2	P	GO:0060290	transdifferentiation
L8I793	SMAD2_MOUSEMothers against decapentaplegic homolog 2 OS=Mus musculus OX=10090 GN=Smad2 PE=1 SV=2	P	GO:0060395	SMAD protein signal transduction
L8I793	SMAD2_MOUSEMothers against decapentaplegic homolog 2 OS=Mus musculus OX=10090 GN=Smad2 PE=1 SV=2	P	GO:0061045	negative regulation of wound healing
L8I793	SMAD2_MOUSEMothers against decapentaplegic homolog 2 OS=Mus musculus OX=10090 GN=Smad2 PE=1 SV=2	P	GO:0061767	negative regulation of lung blood pressure
L8I793	SMAD2_MOUSEMothers against decapentaplegic homolog 2 OS=Mus musculus OX=10090 GN=Smad2 PE=1 SV=2	P	GO:0062009	secondary palate development
L8I793	SMAD2_MOUSEMothers against decapentaplegic homolog 2 OS=Mus musculus OX=10090 GN=Smad2 PE=1 SV=2	P	GO:0070306	lens fiber cell differentiation
L8I793	SMAD2_MOUSEMothers against decapentaplegic homolog 2 OS=Mus musculus OX=10090 GN=Smad2 PE=1 SV=2	P	GO:0070723	response to cholesterol
L8I793	SMAD2_MOUSEMothers against decapentaplegic homolog 2 OS=Mus musculus OX=10090 GN=Smad2 PE=1 SV=2	P	GO:0071345	cellular response to cytokine stimulus
L8I793	SMAD2_MOUSEMothers against decapentaplegic homolog 2 OS=Mus musculus OX=10090 GN=Smad2 PE=1 SV=2	P	GO:0090263	positive regulation of canonical Wnt signaling pathway
L8I793	SMAD2_MOUSEMothers against decapentaplegic homolog 2 OS=Mus musculus OX=10090 GN=Smad2 PE=1 SV=2	P	GO:0097191	extrinsic apoptotic signaling pathway
L8I793	SMAD2_MOUSEMothers against decapentaplegic homolog 2 OS=Mus musculus OX=10090 GN=Smad2 PE=1 SV=2	P	GO:0097296	activation of cysteine-type endopeptidase activity involved in apoptotic signaling pathway
L8I793	SMAD2_MOUSEMothers against decapentaplegic homolog 2 OS=Mus musculus OX=10090 GN=Smad2 PE=1 SV=2	P	GO:1900224	positive regulation of nodal signaling pathway involved in determination of lateral mesoderm left/right asymmetry
L8I793	SMAD2_MOUSEMothers against decapentaplegic homolog 2 OS=Mus musculus OX=10090 GN=Smad2 PE=1 SV=2	P	GO:1901203	positive regulation of extracellular matrix assembly
L8I793	SMAD2_MOUSEMothers against decapentaplegic homolog 2 OS=Mus musculus OX=10090 GN=Smad2 PE=1 SV=2	P	GO:1902895	positive regulation of pri-miRNA transcription by RNA polymerase II
L8I793	SMAD2_MOUSEMothers against decapentaplegic homolog 2 OS=Mus musculus OX=10090 GN=Smad2 PE=1 SV=2	P	GO:1903243	negative regulation of cardiac muscle hypertrophy in response to stress
L8I793	SMAD2_MOUSEMothers against decapentaplegic homolog 2 OS=Mus musculus OX=10090 GN=Smad2 PE=1 SV=2	P	GO:0045449	regulation of transcription, DNA-templated
L8I793	SMAD2_MOUSEMothers against decapentaplegic homolog 2 OS=Mus musculus OX=10090 GN=Smad2 PE=1 SV=2	C	GO:0005581	collagen trimer
L8I793	SMAD2_MOUSEMothers against decapentaplegic homolog 2 OS=Mus musculus OX=10090 GN=Smad2 PE=1 SV=2	C	GO:0016342	catenin complex
L8J274	PDK1_HUMAN	C	GO:0005654	nucleoplasm
L8J274	PDK1_HUMAN	C	GO:0005730	nucleolus
L8J274	PDK1_HUMAN	C	GO:0005829	cytosol
L8J274	PDK1_HUMAN	C	GO:0005967	mitochondrial pyruvate dehydrogenase complex
L8J274	PDK1_HUMAN	F	GO:0004674	protein serine/threonine kinase activity
L8J274	PDK1_HUMAN	F	GO:0004740	pyruvate dehydrogenase (acetyl-transferring) kinase activity
L8J274	PDK1_HUMAN	F	GO:0005524	ATP binding
L8J274	PDK1_HUMAN	F	GO:0042803	protein homodimerization activity
L8J274	PDK1_HUMAN	F	GO:0044877	protein-containing complex binding
L8J274	PDK1_HUMAN	F	GO:0046982	protein heterodimerization activity
L8J274	PDK1_HUMAN	P	GO:0006111	regulation of gluconeogenesis
L8J274	PDK1_HUMAN	P	GO:0006885	regulation of pH
L8J274	PDK1_HUMAN	P	GO:0008283	cell population proliferation
L8J274	PDK1_HUMAN	P	GO:0008286	insulin receptor signaling pathway
L8J274	PDK1_HUMAN	P	GO:0008631	intrinsic apoptotic signaling pathway in response to oxidative stress
L8J274	PDK1_HUMAN	P	GO:0009267	cellular response to starvation
L8J274	PDK1_HUMAN	P	GO:0010510	regulation of acetyl-CoA biosynthetic process from pyruvate
L8J274	PDK1_HUMAN	P	GO:0018105	peptidyl-serine phosphorylation
L8J274	PDK1_HUMAN	P	GO:0031670	cellular response to nutrient
L8J274	PDK1_HUMAN	P	GO:0034614	cellular response to reactive oxygen species
L8J274	PDK1_HUMAN	P	GO:0035357	peroxisome proliferator activated receptor signaling pathway
L8J274	PDK1_HUMAN	P	GO:0042304	regulation of fatty acid biosynthetic process
L8J274	PDK1_HUMAN	P	GO:0045124	regulation of bone resorption
L8J274	PDK1_HUMAN	P	GO:0046320	regulation of fatty acid oxidation
L8J274	PDK1_HUMAN	P	GO:0050848	regulation of calcium-mediated signaling
L8J274	PDK1_HUMAN	P	GO:0071333	cellular response to glucose stimulus
L8J274	PDK1_HUMAN	P	GO:0071398	cellular response to fatty acid
L8J274	PDK1_HUMAN	P	GO:0072332	intrinsic apoptotic signaling pathway by p53 class mediator
L8J274	PDK1_HUMAN	P	GO:0097411	hypoxia-inducible factor-1alpha signaling pathway
L8J274	PDK1_HUMAN	P	GO:2000377	regulation of reactive oxygen species metabolic process
L8J274	PDK1_HUMAN	P	GO:0009069	serine family amino acid metabolic process
L8IUT8	FBN1_BOVINFibrillin-1 OS=Bos taurus OX=9913 GN=FBN1 PE=1 SV=2	C	GO:0001527	microfibril
L8IUT8	FBN1_BOVINFibrillin-1 OS=Bos taurus OX=9913 GN=FBN1 PE=1 SV=2	C	GO:0005604	basement membrane
L8IUT8	FBN1_BOVINFibrillin-1 OS=Bos taurus OX=9913 GN=FBN1 PE=1 SV=2	C	GO:0005615	extracellular space
L8IUT8	FBN1_BOVINFibrillin-1 OS=Bos taurus OX=9913 GN=FBN1 PE=1 SV=2	C	GO:0005788	endoplasmic reticulum lumen
L8IUT8	FBN1_BOVINFibrillin-1 OS=Bos taurus OX=9913 GN=FBN1 PE=1 SV=2	F	GO:0005179	hormone activity
L8IUT8	FBN1_BOVINFibrillin-1 OS=Bos taurus OX=9913 GN=FBN1 PE=1 SV=2	F	GO:0005509	calcium ion binding
L8IUT8	FBN1_BOVINFibrillin-1 OS=Bos taurus OX=9913 GN=FBN1 PE=1 SV=2	F	GO:0008201	heparin binding
L8IUT8	FBN1_BOVINFibrillin-1 OS=Bos taurus OX=9913 GN=FBN1 PE=1 SV=2	F	GO:0030023	extracellular matrix constituent conferring elasticity
L8IUT8	FBN1_BOVINFibrillin-1 OS=Bos taurus OX=9913 GN=FBN1 PE=1 SV=2	F	GO:0042802	identical protein binding
L8IUT8	FBN1_BOVINFibrillin-1 OS=Bos taurus OX=9913 GN=FBN1 PE=1 SV=2	P	GO:0001822	kidney development
L8IUT8	FBN1_BOVINFibrillin-1 OS=Bos taurus OX=9913 GN=FBN1 PE=1 SV=2	P	GO:0006006	glucose metabolic process
L8IUT8	FBN1_BOVINFibrillin-1 OS=Bos taurus OX=9913 GN=FBN1 PE=1 SV=2	P	GO:0010737	protein kinase A signaling
L8IUT8	FBN1_BOVINFibrillin-1 OS=Bos taurus OX=9913 GN=FBN1 PE=1 SV=2	P	GO:0030198	extracellular matrix organization
L8IUT8	FBN1_BOVINFibrillin-1 OS=Bos taurus OX=9913 GN=FBN1 PE=1 SV=2	P	GO:0030326	embryonic limb morphogenesis
L8IUT8	FBN1_BOVINFibrillin-1 OS=Bos taurus OX=9913 GN=FBN1 PE=1 SV=2	P	GO:0030501	positive regulation of bone mineralization
L8IUT8	FBN1_BOVINFibrillin-1 OS=Bos taurus OX=9913 GN=FBN1 PE=1 SV=2	P	GO:0034199	activation of protein kinase A activity
L8IUT8	FBN1_BOVINFibrillin-1 OS=Bos taurus OX=9913 GN=FBN1 PE=1 SV=2	P	GO:0035583	sequestering of TGFbeta in extracellular matrix
L8IUT8	FBN1_BOVINFibrillin-1 OS=Bos taurus OX=9913 GN=FBN1 PE=1 SV=2	P	GO:0042593	glucose homeostasis
L8IUT8	FBN1_BOVINFibrillin-1 OS=Bos taurus OX=9913 GN=FBN1 PE=1 SV=2	P	GO:0043010	camera-type eye development
L8IUT8	FBN1_BOVINFibrillin-1 OS=Bos taurus OX=9913 GN=FBN1 PE=1 SV=2	P	GO:0045669	positive regulation of osteoblast differentiation
L8IUT8	FBN1_BOVINFibrillin-1 OS=Bos taurus OX=9913 GN=FBN1 PE=1 SV=2	P	GO:0045671	negative regulation of osteoclast differentiation
L8IUT8	FBN1_BOVINFibrillin-1 OS=Bos taurus OX=9913 GN=FBN1 PE=1 SV=2	P	GO:0048048	embryonic eye morphogenesis
L8IUT8	FBN1_BOVINFibrillin-1 OS=Bos taurus OX=9913 GN=FBN1 PE=1 SV=2	P	GO:0060346	bone trabecula formation
L8IUT8	FBN1_BOVINFibrillin-1 OS=Bos taurus OX=9913 GN=FBN1 PE=1 SV=2	P	GO:1990314	cellular response to insulin-like growth factor stimulus
L8IUT8	FBN1_BOVINFibrillin-1 OS=Bos taurus OX=9913 GN=FBN1 PE=1 SV=2	C	GO:0005578	extracellular matrix
L8IZ21	PEDF_BOVINPigment epithelium-derived factor OS=Bos taurus OX=9913 GN=SERPINF1 PE=1 SV=1	C	GO:0005604	basement membrane
L8IZ21	PEDF_BOVINPigment epithelium-derived factor OS=Bos taurus OX=9913 GN=SERPINF1 PE=1 SV=1	C	GO:0005615	extracellular space
L8IZ21	PEDF_BOVINPigment epithelium-derived factor OS=Bos taurus OX=9913 GN=SERPINF1 PE=1 SV=1	C	GO:0042470	melanosome
L8IZ21	PEDF_BOVINPigment epithelium-derived factor OS=Bos taurus OX=9913 GN=SERPINF1 PE=1 SV=1	C	GO:0043203	axon hillock
L8IZ21	PEDF_BOVINPigment epithelium-derived factor OS=Bos taurus OX=9913 GN=SERPINF1 PE=1 SV=1	C	GO:0048471	perinuclear region of cytoplasm
L8IZ21	PEDF_BOVINPigment epithelium-derived factor OS=Bos taurus OX=9913 GN=SERPINF1 PE=1 SV=1	F	GO:0004867	serine-type endopeptidase inhibitor activity
L8IZ21	PEDF_BOVINPigment epithelium-derived factor OS=Bos taurus OX=9913 GN=SERPINF1 PE=1 SV=1	F	GO:0005515	protein binding
L8IZ21	PEDF_BOVINPigment epithelium-derived factor OS=Bos taurus OX=9913 GN=SERPINF1 PE=1 SV=1	P	GO:0007568	aging
L8IZ21	PEDF_BOVINPigment epithelium-derived factor OS=Bos taurus OX=9913 GN=SERPINF1 PE=1 SV=1	P	GO:0007614	short-term memory
L8IZ21	PEDF_BOVINPigment epithelium-derived factor OS=Bos taurus OX=9913 GN=SERPINF1 PE=1 SV=1	P	GO:0009891	positive regulation of biosynthetic process
L8IZ21	PEDF_BOVINPigment epithelium-derived factor OS=Bos taurus OX=9913 GN=SERPINF1 PE=1 SV=1	P	GO:0010447	response to acidic pH
L8IZ21	PEDF_BOVINPigment epithelium-derived factor OS=Bos taurus OX=9913 GN=SERPINF1 PE=1 SV=1	P	GO:0010596	negative regulation of endothelial cell migration
L8IZ21	PEDF_BOVINPigment epithelium-derived factor OS=Bos taurus OX=9913 GN=SERPINF1 PE=1 SV=1	P	GO:0010604	positive regulation of macromolecule metabolic process
L8IZ21	PEDF_BOVINPigment epithelium-derived factor OS=Bos taurus OX=9913 GN=SERPINF1 PE=1 SV=1	P	GO:0010629	negative regulation of gene expression
L8IZ21	PEDF_BOVINPigment epithelium-derived factor OS=Bos taurus OX=9913 GN=SERPINF1 PE=1 SV=1	P	GO:0010951	negative regulation of endopeptidase activity
L8IZ21	PEDF_BOVINPigment epithelium-derived factor OS=Bos taurus OX=9913 GN=SERPINF1 PE=1 SV=1	P	GO:0010976	positive regulation of neuron projection development
L8IZ21	PEDF_BOVINPigment epithelium-derived factor OS=Bos taurus OX=9913 GN=SERPINF1 PE=1 SV=1	P	GO:0016525	negative regulation of angiogenesis
L8IZ21	PEDF_BOVINPigment epithelium-derived factor OS=Bos taurus OX=9913 GN=SERPINF1 PE=1 SV=1	P	GO:0031325	positive regulation of cellular metabolic process
L8IZ21	PEDF_BOVINPigment epithelium-derived factor OS=Bos taurus OX=9913 GN=SERPINF1 PE=1 SV=1	P	GO:0042698	ovulation cycle
L8IZ21	PEDF_BOVINPigment epithelium-derived factor OS=Bos taurus OX=9913 GN=SERPINF1 PE=1 SV=1	P	GO:0046685	response to arsenic-containing substance
L8IZ21	PEDF_BOVINPigment epithelium-derived factor OS=Bos taurus OX=9913 GN=SERPINF1 PE=1 SV=1	P	GO:0048584	positive regulation of response to stimulus
L8IZ21	PEDF_BOVINPigment epithelium-derived factor OS=Bos taurus OX=9913 GN=SERPINF1 PE=1 SV=1	P	GO:0050728	negative regulation of inflammatory response
L8IZ21	PEDF_BOVINPigment epithelium-derived factor OS=Bos taurus OX=9913 GN=SERPINF1 PE=1 SV=1	P	GO:0051173	positive regulation of nitrogen compound metabolic process
L8IZ21	PEDF_BOVINPigment epithelium-derived factor OS=Bos taurus OX=9913 GN=SERPINF1 PE=1 SV=1	P	GO:0060041	retina development in camera-type eye
L8IZ21	PEDF_BOVINPigment epithelium-derived factor OS=Bos taurus OX=9913 GN=SERPINF1 PE=1 SV=1	P	GO:0060770	negative regulation of epithelial cell proliferation involved in prostate gland development
L8IZ21	PEDF_BOVINPigment epithelium-derived factor OS=Bos taurus OX=9913 GN=SERPINF1 PE=1 SV=1	P	GO:0071279	cellular response to cobalt ion
L8IZ21	PEDF_BOVINPigment epithelium-derived factor OS=Bos taurus OX=9913 GN=SERPINF1 PE=1 SV=1	P	GO:0071300	cellular response to retinoic acid
L8IZ21	PEDF_BOVINPigment epithelium-derived factor OS=Bos taurus OX=9913 GN=SERPINF1 PE=1 SV=1	P	GO:0071333	cellular response to glucose stimulus
L8IZ21	PEDF_BOVINPigment epithelium-derived factor OS=Bos taurus OX=9913 GN=SERPINF1 PE=1 SV=1	P	GO:0071549	cellular response to dexamethasone stimulus
L8IZ21	PEDF_BOVINPigment epithelium-derived factor OS=Bos taurus OX=9913 GN=SERPINF1 PE=1 SV=1	P	GO:1901215	negative regulation of neuron death
L8IS72	H12_BOVINHistone OS=Bos taurus OX=9913 GN=H1-2 PE=1 SV=2	C	GO:0000788	nuclear nucleosome
L8IS72	H12_BOVINHistone OS=Bos taurus OX=9913 GN=H1-2 PE=1 SV=2	C	GO:0005719	nuclear euchromatin
L8IS72	H12_BOVINHistone OS=Bos taurus OX=9913 GN=H1-2 PE=1 SV=2	C	GO:0005720	nuclear heterochromatin
L8IS72	H12_BOVINHistone OS=Bos taurus OX=9913 GN=H1-2 PE=1 SV=2	C	GO:0005730	nucleolus
L8IS72	H12_BOVINHistone OS=Bos taurus OX=9913 GN=H1-2 PE=1 SV=2	C	GO:0035327	transcriptionally active chromatin
L8IS72	H12_BOVINHistone OS=Bos taurus OX=9913 GN=H1-2 PE=1 SV=2	F	GO:0003690	double-stranded DNA binding
L8IS72	H12_BOVINHistone OS=Bos taurus OX=9913 GN=H1-2 PE=1 SV=2	F	GO:0005509	calcium ion binding
L8IS72	H12_BOVINHistone OS=Bos taurus OX=9913 GN=H1-2 PE=1 SV=2	F	GO:0005524	ATP binding
L8IS72	H12_BOVINHistone OS=Bos taurus OX=9913 GN=H1-2 PE=1 SV=2	F	GO:0005525	GTP binding
L8IS72	H12_BOVINHistone OS=Bos taurus OX=9913 GN=H1-2 PE=1 SV=2	F	GO:0016208	AMP binding
L8IS72	H12_BOVINHistone OS=Bos taurus OX=9913 GN=H1-2 PE=1 SV=2	F	GO:0031492	nucleosomal DNA binding
L8IS72	H12_BOVINHistone OS=Bos taurus OX=9913 GN=H1-2 PE=1 SV=2	F	GO:0032564	dATP binding
L8IS72	H12_BOVINHistone OS=Bos taurus OX=9913 GN=H1-2 PE=1 SV=2	F	GO:0042826	histone deacetylase binding
L8IS72	H12_BOVINHistone OS=Bos taurus OX=9913 GN=H1-2 PE=1 SV=2	F	GO:0043531	ADP binding
L8IS72	H12_BOVINHistone OS=Bos taurus OX=9913 GN=H1-2 PE=1 SV=2	P	GO:0000122	negative regulation of transcription by RNA polymerase II
L8IS72	H12_BOVINHistone OS=Bos taurus OX=9913 GN=H1-2 PE=1 SV=2	P	GO:0006334	nucleosome assembly
L8IS72	H12_BOVINHistone OS=Bos taurus OX=9913 GN=H1-2 PE=1 SV=2	P	GO:0007517	muscle organ development
L8IS72	H12_BOVINHistone OS=Bos taurus OX=9913 GN=H1-2 PE=1 SV=2	P	GO:0016584	nucleosome positioning
L8IS72	H12_BOVINHistone OS=Bos taurus OX=9913 GN=H1-2 PE=1 SV=2	P	GO:0030261	chromosome condensation
L8IS72	H12_BOVINHistone OS=Bos taurus OX=9913 GN=H1-2 PE=1 SV=2	P	GO:0030307	positive regulation of cell growth
L8IS72	H12_BOVINHistone OS=Bos taurus OX=9913 GN=H1-2 PE=1 SV=2	P	GO:0031936	negative regulation of chromatin silencing
L8IS72	H12_BOVINHistone OS=Bos taurus OX=9913 GN=H1-2 PE=1 SV=2	P	GO:0045910	negative regulation of DNA recombination
L8IS72	H12_BOVINHistone OS=Bos taurus OX=9913 GN=H1-2 PE=1 SV=2	P	GO:0050821	protein stabilization
L8IS72	H12_BOVINHistone OS=Bos taurus OX=9913 GN=H1-2 PE=1 SV=2	P	GO:0051574	positive regulation of histone H3-K9 methylation
L8IS72	H12_BOVINHistone OS=Bos taurus OX=9913 GN=H1-2 PE=1 SV=2	P	GO:0071169	establishment of protein localization to chromatin
L8IS72	H12_BOVINHistone OS=Bos taurus OX=9913 GN=H1-2 PE=1 SV=2	P	GO:0080182	histone H3-K4 trimethylation
L8IS72	H12_BOVINHistone OS=Bos taurus OX=9913 GN=H1-2 PE=1 SV=2	P	GO:0098532	histone H3-K27 trimethylation
L8IS72	H12_BOVINHistone OS=Bos taurus OX=9913 GN=H1-2 PE=1 SV=2	C	GO:0000118	histone deacetylase complex
L8HNU2	E41L2_HUMANBand 2 OS=Homo sapiens OX=9606 GN=EPB41L2 PE=1 SV=1	C	GO:0005654	nucleoplasm
L8HNU2	E41L2_HUMANBand 2 OS=Homo sapiens OX=9606 GN=EPB41L2 PE=1 SV=1	C	GO:0005829	cytosol
L8HNU2	E41L2_HUMANBand 2 OS=Homo sapiens OX=9606 GN=EPB41L2 PE=1 SV=1	C	GO:0005911	cell-cell junction
L8HNU2	E41L2_HUMANBand 2 OS=Homo sapiens OX=9606 GN=EPB41L2 PE=1 SV=1	C	GO:0008091	spectrin
L8HNU2	E41L2_HUMANBand 2 OS=Homo sapiens OX=9606 GN=EPB41L2 PE=1 SV=1	C	GO:0008180	COP9 signalosome
L8HNU2	E41L2_HUMANBand 2 OS=Homo sapiens OX=9606 GN=EPB41L2 PE=1 SV=1	C	GO:0014069	postsynaptic density
L8HNU2	E41L2_HUMANBand 2 OS=Homo sapiens OX=9606 GN=EPB41L2 PE=1 SV=1	C	GO:0014731	spectrin-associated cytoskeleton
L8HNU2	E41L2_HUMANBand 2 OS=Homo sapiens OX=9606 GN=EPB41L2 PE=1 SV=1	C	GO:0016323	basolateral plasma membrane
L8HNU2	E41L2_HUMANBand 2 OS=Homo sapiens OX=9606 GN=EPB41L2 PE=1 SV=1	C	GO:0030673	axolemma
L8HNU2	E41L2_HUMANBand 2 OS=Homo sapiens OX=9606 GN=EPB41L2 PE=1 SV=1	C	GO:0033270	paranode region of axon
L8HNU2	E41L2_HUMANBand 2 OS=Homo sapiens OX=9606 GN=EPB41L2 PE=1 SV=1	C	GO:0044224	juxtaparanode region of axon
L8HNU2	E41L2_HUMANBand 2 OS=Homo sapiens OX=9606 GN=EPB41L2 PE=1 SV=1	C	GO:0097060	synaptic membrane
L8HNU2	E41L2_HUMANBand 2 OS=Homo sapiens OX=9606 GN=EPB41L2 PE=1 SV=1	C	GO:0099738	cell cortex region
L8HNU2	E41L2_HUMANBand 2 OS=Homo sapiens OX=9606 GN=EPB41L2 PE=1 SV=1	F	GO:0003779	actin binding
L8HNU2	E41L2_HUMANBand 2 OS=Homo sapiens OX=9606 GN=EPB41L2 PE=1 SV=1	F	GO:0005102	signaling receptor binding
L8HNU2	E41L2_HUMANBand 2 OS=Homo sapiens OX=9606 GN=EPB41L2 PE=1 SV=1	F	GO:0005200	structural constituent of cytoskeleton
L8HNU2	E41L2_HUMANBand 2 OS=Homo sapiens OX=9606 GN=EPB41L2 PE=1 SV=1	F	GO:0005545	1-phosphatidylinositol binding
L8HNU2	E41L2_HUMANBand 2 OS=Homo sapiens OX=9606 GN=EPB41L2 PE=1 SV=1	F	GO:0008022	protein C-terminus binding
L8HNU2	E41L2_HUMANBand 2 OS=Homo sapiens OX=9606 GN=EPB41L2 PE=1 SV=1	F	GO:0030507	spectrin binding
L8HNU2	E41L2_HUMANBand 2 OS=Homo sapiens OX=9606 GN=EPB41L2 PE=1 SV=1	F	GO:0042731	PH domain binding
L8HNU2	E41L2_HUMANBand 2 OS=Homo sapiens OX=9606 GN=EPB41L2 PE=1 SV=1	F	GO:0047485	protein N-terminus binding
L8HNU2	E41L2_HUMANBand 2 OS=Homo sapiens OX=9606 GN=EPB41L2 PE=1 SV=1	F	GO:0051219	phosphoprotein binding
L8HNU2	E41L2_HUMANBand 2 OS=Homo sapiens OX=9606 GN=EPB41L2 PE=1 SV=1	P	GO:0001558	regulation of cell growth
L8HNU2	E41L2_HUMANBand 2 OS=Homo sapiens OX=9606 GN=EPB41L2 PE=1 SV=1	P	GO:0002175	protein localization to paranode region of axon
L8HNU2	E41L2_HUMANBand 2 OS=Homo sapiens OX=9606 GN=EPB41L2 PE=1 SV=1	P	GO:0006915	apoptotic process
L8HNU2	E41L2_HUMANBand 2 OS=Homo sapiens OX=9606 GN=EPB41L2 PE=1 SV=1	P	GO:0007016	cytoskeletal anchoring at plasma membrane
L8HNU2	E41L2_HUMANBand 2 OS=Homo sapiens OX=9606 GN=EPB41L2 PE=1 SV=1	P	GO:0007049	cell cycle
L8HNU2	E41L2_HUMANBand 2 OS=Homo sapiens OX=9606 GN=EPB41L2 PE=1 SV=1	P	GO:0008360	regulation of cell shape
L8HNU2	E41L2_HUMANBand 2 OS=Homo sapiens OX=9606 GN=EPB41L2 PE=1 SV=1	P	GO:0030866	cortical actin cytoskeleton organization
L8HNU2	E41L2_HUMANBand 2 OS=Homo sapiens OX=9606 GN=EPB41L2 PE=1 SV=1	P	GO:0030913	paranodal junction assembly
L8HNU2	E41L2_HUMANBand 2 OS=Homo sapiens OX=9606 GN=EPB41L2 PE=1 SV=1	P	GO:0031032	actomyosin structure organization
L8HNU2	E41L2_HUMANBand 2 OS=Homo sapiens OX=9606 GN=EPB41L2 PE=1 SV=1	P	GO:0032092	positive regulation of protein binding
L8HNU2	E41L2_HUMANBand 2 OS=Homo sapiens OX=9606 GN=EPB41L2 PE=1 SV=1	P	GO:0043217	myelin maintenance
L8HNU2	E41L2_HUMANBand 2 OS=Homo sapiens OX=9606 GN=EPB41L2 PE=1 SV=1	P	GO:0048812	neuron projection morphogenesis
L8HNU2	E41L2_HUMANBand 2 OS=Homo sapiens OX=9606 GN=EPB41L2 PE=1 SV=1	P	GO:0051301	cell division
L8HNU2	E41L2_HUMANBand 2 OS=Homo sapiens OX=9606 GN=EPB41L2 PE=1 SV=1	P	GO:0051924	regulation of calcium ion transport
L8HNU2	E41L2_HUMANBand 2 OS=Homo sapiens OX=9606 GN=EPB41L2 PE=1 SV=1	P	GO:0071205	protein localization to juxtaparanode region of axon
L8HNU2	E41L2_HUMANBand 2 OS=Homo sapiens OX=9606 GN=EPB41L2 PE=1 SV=1	P	GO:0072659	protein localization to plasma membrane
L8HNU2	E41L2_HUMANBand 2 OS=Homo sapiens OX=9606 GN=EPB41L2 PE=1 SV=1	P	GO:1904478	regulation of intestinal absorption
L8HNU2	E41L2_HUMANBand 2 OS=Homo sapiens OX=9606 GN=EPB41L2 PE=1 SV=1	P	GO:1904778	positive regulation of protein localization to cell cortex
L8HNU2	E41L2_HUMANBand 2 OS=Homo sapiens OX=9606 GN=EPB41L2 PE=1 SV=1	P	GO:0007165	signal transduction
L8HWY2	HXK2_PIGHexokinase-2 OS=Sus scrofa OX=9823 GN=HK2 PE=2 SV=1	C	GO:0005741	mitochondrial outer membrane
L8HWY2	HXK2_PIGHexokinase-2 OS=Sus scrofa OX=9823 GN=HK2 PE=2 SV=1	C	GO:0005829	cytosol
L8HWY2	HXK2_PIGHexokinase-2 OS=Sus scrofa OX=9823 GN=HK2 PE=2 SV=1	C	GO:0005901	caveola
L8HWY2	HXK2_PIGHexokinase-2 OS=Sus scrofa OX=9823 GN=HK2 PE=2 SV=1	C	GO:0016529	sarcoplasmic reticulum
L8HWY2	HXK2_PIGHexokinase-2 OS=Sus scrofa OX=9823 GN=HK2 PE=2 SV=1	C	GO:0032991	protein-containing complex
L8HWY2	HXK2_PIGHexokinase-2 OS=Sus scrofa OX=9823 GN=HK2 PE=2 SV=1	F	GO:0004340	glucokinase activity
L8HWY2	HXK2_PIGHexokinase-2 OS=Sus scrofa OX=9823 GN=HK2 PE=2 SV=1	F	GO:0004672	protein kinase activity
L8HWY2	HXK2_PIGHexokinase-2 OS=Sus scrofa OX=9823 GN=HK2 PE=2 SV=1	F	GO:0005524	ATP binding
L8HWY2	HXK2_PIGHexokinase-2 OS=Sus scrofa OX=9823 GN=HK2 PE=2 SV=1	F	GO:0005536	glucose binding
L8HWY2	HXK2_PIGHexokinase-2 OS=Sus scrofa OX=9823 GN=HK2 PE=2 SV=1	F	GO:0008865	fructokinase activity
L8HWY2	HXK2_PIGHexokinase-2 OS=Sus scrofa OX=9823 GN=HK2 PE=2 SV=1	F	GO:0016887	ATPase activity
L8HWY2	HXK2_PIGHexokinase-2 OS=Sus scrofa OX=9823 GN=HK2 PE=2 SV=1	F	GO:0019158	mannokinase activity
L8HWY2	HXK2_PIGHexokinase-2 OS=Sus scrofa OX=9823 GN=HK2 PE=2 SV=1	F	GO:0042803	protein homodimerization activity
L8HWY2	HXK2_PIGHexokinase-2 OS=Sus scrofa OX=9823 GN=HK2 PE=2 SV=1	F	GO:0044877	protein-containing complex binding
L8HWY2	HXK2_PIGHexokinase-2 OS=Sus scrofa OX=9823 GN=HK2 PE=2 SV=1	P	GO:0001666	response to hypoxia
L8HWY2	HXK2_PIGHexokinase-2 OS=Sus scrofa OX=9823 GN=HK2 PE=2 SV=1	P	GO:0001678	cellular glucose homeostasis
L8HWY2	HXK2_PIGHexokinase-2 OS=Sus scrofa OX=9823 GN=HK2 PE=2 SV=1	P	GO:0002741	positive regulation of cytokine secretion involved in immune response
L8HWY2	HXK2_PIGHexokinase-2 OS=Sus scrofa OX=9823 GN=HK2 PE=2 SV=1	P	GO:0002931	response to ischemia
L8HWY2	HXK2_PIGHexokinase-2 OS=Sus scrofa OX=9823 GN=HK2 PE=2 SV=1	P	GO:0006002	fructose 6-phosphate metabolic process
L8HWY2	HXK2_PIGHexokinase-2 OS=Sus scrofa OX=9823 GN=HK2 PE=2 SV=1	P	GO:0006013	mannose metabolic process
L8HWY2	HXK2_PIGHexokinase-2 OS=Sus scrofa OX=9823 GN=HK2 PE=2 SV=1	P	GO:0006954	inflammatory response
L8HWY2	HXK2_PIGHexokinase-2 OS=Sus scrofa OX=9823 GN=HK2 PE=2 SV=1	P	GO:0007595	lactation
L8HWY2	HXK2_PIGHexokinase-2 OS=Sus scrofa OX=9823 GN=HK2 PE=2 SV=1	P	GO:0008637	apoptotic mitochondrial changes
L8HWY2	HXK2_PIGHexokinase-2 OS=Sus scrofa OX=9823 GN=HK2 PE=2 SV=1	P	GO:0009741	response to brassinosteroid
L8HWY2	HXK2_PIGHexokinase-2 OS=Sus scrofa OX=9823 GN=HK2 PE=2 SV=1	P	GO:0010359	regulation of anion channel activity
L8HWY2	HXK2_PIGHexokinase-2 OS=Sus scrofa OX=9823 GN=HK2 PE=2 SV=1	P	GO:0018105	peptidyl-serine phosphorylation
L8HWY2	HXK2_PIGHexokinase-2 OS=Sus scrofa OX=9823 GN=HK2 PE=2 SV=1	P	GO:0018107	peptidyl-threonine phosphorylation
L8HWY2	HXK2_PIGHexokinase-2 OS=Sus scrofa OX=9823 GN=HK2 PE=2 SV=1	P	GO:0018108	peptidyl-tyrosine phosphorylation
L8HWY2	HXK2_PIGHexokinase-2 OS=Sus scrofa OX=9823 GN=HK2 PE=2 SV=1	P	GO:0035795	negative regulation of mitochondrial membrane permeability
L8HWY2	HXK2_PIGHexokinase-2 OS=Sus scrofa OX=9823 GN=HK2 PE=2 SV=1	P	GO:0043066	negative regulation of apoptotic process
L8HWY2	HXK2_PIGHexokinase-2 OS=Sus scrofa OX=9823 GN=HK2 PE=2 SV=1	P	GO:0045087	innate immune response
L8HWY2	HXK2_PIGHexokinase-2 OS=Sus scrofa OX=9823 GN=HK2 PE=2 SV=1	P	GO:0045766	positive regulation of angiogenesis
L8HWY2	HXK2_PIGHexokinase-2 OS=Sus scrofa OX=9823 GN=HK2 PE=2 SV=1	P	GO:0046324	regulation of glucose import
L8HWY2	HXK2_PIGHexokinase-2 OS=Sus scrofa OX=9823 GN=HK2 PE=2 SV=1	P	GO:0046777	protein autophosphorylation
L8HWY2	HXK2_PIGHexokinase-2 OS=Sus scrofa OX=9823 GN=HK2 PE=2 SV=1	P	GO:0046835	carbohydrate phosphorylation
L8HWY2	HXK2_PIGHexokinase-2 OS=Sus scrofa OX=9823 GN=HK2 PE=2 SV=1	P	GO:0050718	positive regulation of interleukin-1 beta secretion
L8HWY2	HXK2_PIGHexokinase-2 OS=Sus scrofa OX=9823 GN=HK2 PE=2 SV=1	P	GO:0051156	glucose 6-phosphate metabolic process
L8HWY2	HXK2_PIGHexokinase-2 OS=Sus scrofa OX=9823 GN=HK2 PE=2 SV=1	P	GO:0061621	canonical glycolysis
L8HWY2	HXK2_PIGHexokinase-2 OS=Sus scrofa OX=9823 GN=HK2 PE=2 SV=1	P	GO:0072655	establishment of protein localization to mitochondrion
L8HWY2	HXK2_PIGHexokinase-2 OS=Sus scrofa OX=9823 GN=HK2 PE=2 SV=1	P	GO:0072656	maintenance of protein location in mitochondrion
L8HWY2	HXK2_PIGHexokinase-2 OS=Sus scrofa OX=9823 GN=HK2 PE=2 SV=1	P	GO:1901986	response to ketamine
L8HWY2	HXK2_PIGHexokinase-2 OS=Sus scrofa OX=9823 GN=HK2 PE=2 SV=1	P	GO:1904925	positive regulation of autophagy of mitochondrion in response to mitochondrial depolarization
L8HWY2	HXK2_PIGHexokinase-2 OS=Sus scrofa OX=9823 GN=HK2 PE=2 SV=1	P	GO:1990830	cellular response to leukemia inhibitory factor
L8HWY2	HXK2_PIGHexokinase-2 OS=Sus scrofa OX=9823 GN=HK2 PE=2 SV=1	P	GO:2000378	negative regulation of reactive oxygen species metabolic process
L8HWY2	HXK2_PIGHexokinase-2 OS=Sus scrofa OX=9823 GN=HK2 PE=2 SV=1	P	GO:0005982	starch metabolic process
L8HWY2	HXK2_PIGHexokinase-2 OS=Sus scrofa OX=9823 GN=HK2 PE=2 SV=1	P	GO:0005985	sucrose metabolic process
L8HWY2	HXK2_PIGHexokinase-2 OS=Sus scrofa OX=9823 GN=HK2 PE=2 SV=1	P	GO:0006012	galactose metabolic process
L8HWY2	HXK2_PIGHexokinase-2 OS=Sus scrofa OX=9823 GN=HK2 PE=2 SV=1	P	GO:0006094	gluconeogenesis
L8HWY2	HXK2_PIGHexokinase-2 OS=Sus scrofa OX=9823 GN=HK2 PE=2 SV=1	P	GO:0019872	streptomycin biosynthetic process
L8HWY2	HXK2_PIGHexokinase-2 OS=Sus scrofa OX=9823 GN=HK2 PE=2 SV=1	P	GO:0006000	fructose metabolic process
L8HQR6	LG3BP_BOVINGalectin-3-binding OS=Bos taurus OX=9913 GN=LGALS3BP PE=1 SV=1	C	GO:0005615	extracellular space
L8HQR6	LG3BP_BOVINGalectin-3-binding OS=Bos taurus OX=9913 GN=LGALS3BP PE=1 SV=1	C	GO:0005887	integral component of plasma membrane
L8HQR6	LG3BP_BOVINGalectin-3-binding OS=Bos taurus OX=9913 GN=LGALS3BP PE=1 SV=1	C	GO:0009897	external side of plasma membrane
L8HQR6	LG3BP_BOVINGalectin-3-binding OS=Bos taurus OX=9913 GN=LGALS3BP PE=1 SV=1	C	GO:0030666	endocytic vesicle membrane
L8HQR6	LG3BP_BOVINGalectin-3-binding OS=Bos taurus OX=9913 GN=LGALS3BP PE=1 SV=1	F	GO:0005044	scavenger receptor activity
L8HQR6	LG3BP_BOVINGalectin-3-binding OS=Bos taurus OX=9913 GN=LGALS3BP PE=1 SV=1	F	GO:0005515	protein binding
L8HQR6	LG3BP_BOVINGalectin-3-binding OS=Bos taurus OX=9913 GN=LGALS3BP PE=1 SV=1	P	GO:0002576	platelet degranulation
L8HQR6	LG3BP_BOVINGalectin-3-binding OS=Bos taurus OX=9913 GN=LGALS3BP PE=1 SV=1	P	GO:0006898	receptor-mediated endocytosis
L8HQR6	LG3BP_BOVINGalectin-3-binding OS=Bos taurus OX=9913 GN=LGALS3BP PE=1 SV=1	P	GO:0006968	cellular defense response
L8HQR6	LG3BP_BOVINGalectin-3-binding OS=Bos taurus OX=9913 GN=LGALS3BP PE=1 SV=1	P	GO:0007155	cell adhesion
L8HQR6	LG3BP_BOVINGalectin-3-binding OS=Bos taurus OX=9913 GN=LGALS3BP PE=1 SV=1	P	GO:0007165	signal transduction
L8HPT2	S10A2_BOVIN S100-A2 OS=Bos taurus OX=9913 GN=S100A2 PE=1 SV=1	C	GO:0043227	membrane-bounded organelle
L8HPT2	S10A2_BOVIN S100-A2 OS=Bos taurus OX=9913 GN=S100A2 PE=1 SV=1	C	GO:0044424	intracellular part
L8HPT2	S10A2_BOVIN S100-A2 OS=Bos taurus OX=9913 GN=S100A2 PE=1 SV=1	C	GO:0097458	neuron part
L8HPT2	S10A2_BOVIN S100-A2 OS=Bos taurus OX=9913 GN=S100A2 PE=1 SV=1	F	GO:0005509	calcium ion binding
L8HPT2	S10A2_BOVIN S100-A2 OS=Bos taurus OX=9913 GN=S100A2 PE=1 SV=1	F	GO:0042802	identical protein binding
L8HPT2	S10A2_BOVIN S100-A2 OS=Bos taurus OX=9913 GN=S100A2 PE=1 SV=1	F	GO:0046914	transition metal ion binding
L8HPT2	S10A2_BOVIN S100-A2 OS=Bos taurus OX=9913 GN=S100A2 PE=1 SV=1	P	GO:0043542	endothelial cell migration
L8IMB9	H2B3B_HUMANHistone H2B type 3-B OS=Homo sapiens OX=9606 GN=H2BU1 PE=1 SV=3	C	GO:0000786	nucleosome
L8IMB9	H2B3B_HUMANHistone H2B type 3-B OS=Homo sapiens OX=9606 GN=H2BU1 PE=1 SV=3	C	GO:0005615	extracellular space
L8IMB9	H2B3B_HUMANHistone H2B type 3-B OS=Homo sapiens OX=9606 GN=H2BU1 PE=1 SV=3	C	GO:0005654	nucleoplasm
L8IMB9	H2B3B_HUMANHistone H2B type 3-B OS=Homo sapiens OX=9606 GN=H2BU1 PE=1 SV=3	C	GO:0005829	cytosol
L8IMB9	H2B3B_HUMANHistone H2B type 3-B OS=Homo sapiens OX=9606 GN=H2BU1 PE=1 SV=3	F	GO:0003677	DNA binding
L8IMB9	H2B3B_HUMANHistone H2B type 3-B OS=Homo sapiens OX=9606 GN=H2BU1 PE=1 SV=3	F	GO:0042802	identical protein binding
L8IMB9	H2B3B_HUMANHistone H2B type 3-B OS=Homo sapiens OX=9606 GN=H2BU1 PE=1 SV=3	F	GO:0044389	ubiquitin-like protein ligase binding
L8IMB9	H2B3B_HUMANHistone H2B type 3-B OS=Homo sapiens OX=9606 GN=H2BU1 PE=1 SV=3	F	GO:0046982	protein heterodimerization activity
L8IMB9	H2B3B_HUMANHistone H2B type 3-B OS=Homo sapiens OX=9606 GN=H2BU1 PE=1 SV=3	F	GO:0097677	STAT family protein binding
L8IMB9	H2B3B_HUMANHistone H2B type 3-B OS=Homo sapiens OX=9606 GN=H2BU1 PE=1 SV=3	P	GO:0002227	innate immune response in mucosa
L8IMB9	H2B3B_HUMANHistone H2B type 3-B OS=Homo sapiens OX=9606 GN=H2BU1 PE=1 SV=3	P	GO:0006334	nucleosome assembly
L8IMB9	H2B3B_HUMANHistone H2B type 3-B OS=Homo sapiens OX=9606 GN=H2BU1 PE=1 SV=3	P	GO:0016567	protein ubiquitination
L8IMB9	H2B3B_HUMANHistone H2B type 3-B OS=Homo sapiens OX=9606 GN=H2BU1 PE=1 SV=3	P	GO:0019731	antibacterial humoral response
L8IMB9	H2B3B_HUMANHistone H2B type 3-B OS=Homo sapiens OX=9606 GN=H2BU1 PE=1 SV=3	P	GO:0031640	killing of cells of other organism
L8IMB9	H2B3B_HUMANHistone H2B type 3-B OS=Homo sapiens OX=9606 GN=H2BU1 PE=1 SV=3	P	GO:0050829	defense response to Gram-negative bacterium
L8IMB9	H2B3B_HUMANHistone H2B type 3-B OS=Homo sapiens OX=9606 GN=H2BU1 PE=1 SV=3	P	GO:0050830	defense response to Gram-positive bacterium
L8IMB9	H2B3B_HUMANHistone H2B type 3-B OS=Homo sapiens OX=9606 GN=H2BU1 PE=1 SV=3	P	GO:0061844	antimicrobial humoral immune response mediated by antimicrobial peptide
L8I7A3	ARHGP_MOUSERho guanine nucleotide exchange factor 25 OS=Mus musculus OX=10090 GN=Arhgef25 PE=1 SV=1	C	GO:0005654	nucleoplasm
L8I7A3	ARHGP_MOUSERho guanine nucleotide exchange factor 25 OS=Mus musculus OX=10090 GN=Arhgef25 PE=1 SV=1	C	GO:0005769	early endosome
L8I7A3	ARHGP_MOUSERho guanine nucleotide exchange factor 25 OS=Mus musculus OX=10090 GN=Arhgef25 PE=1 SV=1	C	GO:0005829	cytosol
L8I7A3	ARHGP_MOUSERho guanine nucleotide exchange factor 25 OS=Mus musculus OX=10090 GN=Arhgef25 PE=1 SV=1	C	GO:0005886	plasma membrane
L8I7A3	ARHGP_MOUSERho guanine nucleotide exchange factor 25 OS=Mus musculus OX=10090 GN=Arhgef25 PE=1 SV=1	C	GO:0014069	postsynaptic density
L8I7A3	ARHGP_MOUSERho guanine nucleotide exchange factor 25 OS=Mus musculus OX=10090 GN=Arhgef25 PE=1 SV=1	C	GO:0015629	actin cytoskeleton
L8I7A3	ARHGP_MOUSERho guanine nucleotide exchange factor 25 OS=Mus musculus OX=10090 GN=Arhgef25 PE=1 SV=1	C	GO:0030017	sarcomere
L8I7A3	ARHGP_MOUSERho guanine nucleotide exchange factor 25 OS=Mus musculus OX=10090 GN=Arhgef25 PE=1 SV=1	C	GO:0043005	neuron projection
L8I7A3	ARHGP_MOUSERho guanine nucleotide exchange factor 25 OS=Mus musculus OX=10090 GN=Arhgef25 PE=1 SV=1	C	GO:0043025	neuronal cell body
L8I7A3	ARHGP_MOUSERho guanine nucleotide exchange factor 25 OS=Mus musculus OX=10090 GN=Arhgef25 PE=1 SV=1	C	GO:0048471	perinuclear region of cytoplasm
L8I7A3	ARHGP_MOUSERho guanine nucleotide exchange factor 25 OS=Mus musculus OX=10090 GN=Arhgef25 PE=1 SV=1	C	GO:0098793	presynapse
L8I7A3	ARHGP_MOUSERho guanine nucleotide exchange factor 25 OS=Mus musculus OX=10090 GN=Arhgef25 PE=1 SV=1	C	GO:0098978	glutamatergic synapse
L8I7A3	ARHGP_MOUSERho guanine nucleotide exchange factor 25 OS=Mus musculus OX=10090 GN=Arhgef25 PE=1 SV=1	F	GO:0004674	protein serine/threonine kinase activity
L8I7A3	ARHGP_MOUSERho guanine nucleotide exchange factor 25 OS=Mus musculus OX=10090 GN=Arhgef25 PE=1 SV=1	F	GO:0005089	Rho guanyl-nucleotide exchange factor activity
L8I7A3	ARHGP_MOUSERho guanine nucleotide exchange factor 25 OS=Mus musculus OX=10090 GN=Arhgef25 PE=1 SV=1	F	GO:0005524	ATP binding
L8I7A3	ARHGP_MOUSERho guanine nucleotide exchange factor 25 OS=Mus musculus OX=10090 GN=Arhgef25 PE=1 SV=1	F	GO:0046872	metal ion binding
L8I7A3	ARHGP_MOUSERho guanine nucleotide exchange factor 25 OS=Mus musculus OX=10090 GN=Arhgef25 PE=1 SV=1	P	GO:0006468	protein phosphorylation
L8I7A3	ARHGP_MOUSERho guanine nucleotide exchange factor 25 OS=Mus musculus OX=10090 GN=Arhgef25 PE=1 SV=1	P	GO:0007185	transmembrane receptor protein tyrosine phosphatase signaling pathway
L8I7A3	ARHGP_MOUSERho guanine nucleotide exchange factor 25 OS=Mus musculus OX=10090 GN=Arhgef25 PE=1 SV=1	P	GO:0007186	G protein-coupled receptor signaling pathway
L8I7A3	ARHGP_MOUSERho guanine nucleotide exchange factor 25 OS=Mus musculus OX=10090 GN=Arhgef25 PE=1 SV=1	P	GO:0007411	axon guidance
L8I7A3	ARHGP_MOUSERho guanine nucleotide exchange factor 25 OS=Mus musculus OX=10090 GN=Arhgef25 PE=1 SV=1	P	GO:0007417	central nervous system development
L8I7A3	ARHGP_MOUSERho guanine nucleotide exchange factor 25 OS=Mus musculus OX=10090 GN=Arhgef25 PE=1 SV=1	P	GO:0007528	neuromuscular junction development
L8I7A3	ARHGP_MOUSERho guanine nucleotide exchange factor 25 OS=Mus musculus OX=10090 GN=Arhgef25 PE=1 SV=1	P	GO:0007595	lactation
L8I7A3	ARHGP_MOUSERho guanine nucleotide exchange factor 25 OS=Mus musculus OX=10090 GN=Arhgef25 PE=1 SV=1	P	GO:0007613	memory
L8I7A3	ARHGP_MOUSERho guanine nucleotide exchange factor 25 OS=Mus musculus OX=10090 GN=Arhgef25 PE=1 SV=1	P	GO:0008344	adult locomotory behavior
L8I7A3	ARHGP_MOUSERho guanine nucleotide exchange factor 25 OS=Mus musculus OX=10090 GN=Arhgef25 PE=1 SV=1	P	GO:0016192	vesicle-mediated transport
L8I7A3	ARHGP_MOUSERho guanine nucleotide exchange factor 25 OS=Mus musculus OX=10090 GN=Arhgef25 PE=1 SV=1	P	GO:0035023	regulation of Rho protein signal transduction
L8I7A3	ARHGP_MOUSERho guanine nucleotide exchange factor 25 OS=Mus musculus OX=10090 GN=Arhgef25 PE=1 SV=1	P	GO:0035176	social behavior
L8I7A3	ARHGP_MOUSERho guanine nucleotide exchange factor 25 OS=Mus musculus OX=10090 GN=Arhgef25 PE=1 SV=1	P	GO:0042711	maternal behavior
L8I7A3	ARHGP_MOUSERho guanine nucleotide exchange factor 25 OS=Mus musculus OX=10090 GN=Arhgef25 PE=1 SV=1	P	GO:0043065	positive regulation of apoptotic process
L8I7A3	ARHGP_MOUSERho guanine nucleotide exchange factor 25 OS=Mus musculus OX=10090 GN=Arhgef25 PE=1 SV=1	P	GO:0043547	positive regulation of GTPase activity
L8I7A3	ARHGP_MOUSERho guanine nucleotide exchange factor 25 OS=Mus musculus OX=10090 GN=Arhgef25 PE=1 SV=1	P	GO:0045599	negative regulation of fat cell differentiation
L8I7A3	ARHGP_MOUSERho guanine nucleotide exchange factor 25 OS=Mus musculus OX=10090 GN=Arhgef25 PE=1 SV=1	P	GO:0046959	habituation
L8I7A3	ARHGP_MOUSERho guanine nucleotide exchange factor 25 OS=Mus musculus OX=10090 GN=Arhgef25 PE=1 SV=1	P	GO:0048013	ephrin receptor signaling pathway
L8I7A3	ARHGP_MOUSERho guanine nucleotide exchange factor 25 OS=Mus musculus OX=10090 GN=Arhgef25 PE=1 SV=1	P	GO:0060125	negative regulation of growth hormone secretion
L8I7A3	ARHGP_MOUSERho guanine nucleotide exchange factor 25 OS=Mus musculus OX=10090 GN=Arhgef25 PE=1 SV=1	P	GO:0060137	maternal process involved in parturition
L8I7A3	ARHGP_MOUSERho guanine nucleotide exchange factor 25 OS=Mus musculus OX=10090 GN=Arhgef25 PE=1 SV=1	P	GO:0061003	positive regulation of dendritic spine morphogenesis
L8I7A3	ARHGP_MOUSERho guanine nucleotide exchange factor 25 OS=Mus musculus OX=10090 GN=Arhgef25 PE=1 SV=1	P	GO:0098696	regulation of neurotransmitter receptor localization to postsynaptic specialization membrane
L8I7A3	ARHGP_MOUSERho guanine nucleotide exchange factor 25 OS=Mus musculus OX=10090 GN=Arhgef25 PE=1 SV=1	P	GO:0098989	NMDA selective glutamate receptor signaling pathway
L8I7A3	ARHGP_MOUSERho guanine nucleotide exchange factor 25 OS=Mus musculus OX=10090 GN=Arhgef25 PE=1 SV=1	P	GO:1905274	regulation of modification of postsynaptic actin cytoskeleton
L8I7A3	ARHGP_MOUSERho guanine nucleotide exchange factor 25 OS=Mus musculus OX=10090 GN=Arhgef25 PE=1 SV=1	P	GO:0009069	serine family amino acid metabolic process
L8HW49	FHL1_HUMANFour and a half LIM domains 1 OS=Homo sapiens OX=9606 GN=FHL1 PE=1 SV=4	C	GO:0005634	nucleus
L8HW49	FHL1_HUMANFour and a half LIM domains 1 OS=Homo sapiens OX=9606 GN=FHL1 PE=1 SV=4	C	GO:0005829	cytosol
L8HW49	FHL1_HUMANFour and a half LIM domains 1 OS=Homo sapiens OX=9606 GN=FHL1 PE=1 SV=4	C	GO:0005886	plasma membrane
L8HW49	FHL1_HUMANFour and a half LIM domains 1 OS=Homo sapiens OX=9606 GN=FHL1 PE=1 SV=4	C	GO:0030018	Z disc
L8HW49	FHL1_HUMANFour and a half LIM domains 1 OS=Homo sapiens OX=9606 GN=FHL1 PE=1 SV=4	C	GO:0031430	M band
L8HW49	FHL1_HUMANFour and a half LIM domains 1 OS=Homo sapiens OX=9606 GN=FHL1 PE=1 SV=4	F	GO:0003713	transcription coactivator activity
L8HW49	FHL1_HUMANFour and a half LIM domains 1 OS=Homo sapiens OX=9606 GN=FHL1 PE=1 SV=4	F	GO:0008134	transcription factor binding
L8HW49	FHL1_HUMANFour and a half LIM domains 1 OS=Homo sapiens OX=9606 GN=FHL1 PE=1 SV=4	F	GO:0042802	identical protein binding
L8HW49	FHL1_HUMANFour and a half LIM domains 1 OS=Homo sapiens OX=9606 GN=FHL1 PE=1 SV=4	F	GO:0044325	ion channel binding
L8HW49	FHL1_HUMANFour and a half LIM domains 1 OS=Homo sapiens OX=9606 GN=FHL1 PE=1 SV=4	F	GO:0046872	metal ion binding
L8HW49	FHL1_HUMANFour and a half LIM domains 1 OS=Homo sapiens OX=9606 GN=FHL1 PE=1 SV=4	P	GO:0000122	negative regulation of transcription by RNA polymerase II
L8HW49	FHL1_HUMANFour and a half LIM domains 1 OS=Homo sapiens OX=9606 GN=FHL1 PE=1 SV=4	P	GO:0001649	osteoblast differentiation
L8HW49	FHL1_HUMANFour and a half LIM domains 1 OS=Homo sapiens OX=9606 GN=FHL1 PE=1 SV=4	P	GO:0003254	regulation of membrane depolarization
L8HW49	FHL1_HUMANFour and a half LIM domains 1 OS=Homo sapiens OX=9606 GN=FHL1 PE=1 SV=4	P	GO:0007517	muscle organ development
L8HW49	FHL1_HUMANFour and a half LIM domains 1 OS=Homo sapiens OX=9606 GN=FHL1 PE=1 SV=4	P	GO:0009725	response to hormone
L8HW49	FHL1_HUMANFour and a half LIM domains 1 OS=Homo sapiens OX=9606 GN=FHL1 PE=1 SV=4	P	GO:0010972	negative regulation of G2/M transition of mitotic cell cycle
L8HW49	FHL1_HUMANFour and a half LIM domains 1 OS=Homo sapiens OX=9606 GN=FHL1 PE=1 SV=4	P	GO:0030308	negative regulation of cell growth
L8HW49	FHL1_HUMANFour and a half LIM domains 1 OS=Homo sapiens OX=9606 GN=FHL1 PE=1 SV=4	P	GO:0043066	negative regulation of apoptotic process
L8HW49	FHL1_HUMANFour and a half LIM domains 1 OS=Homo sapiens OX=9606 GN=FHL1 PE=1 SV=4	P	GO:0043268	positive regulation of potassium ion transport
L8HW49	FHL1_HUMANFour and a half LIM domains 1 OS=Homo sapiens OX=9606 GN=FHL1 PE=1 SV=4	P	GO:0045944	positive regulation of transcription by RNA polymerase II
L8HW49	FHL1_HUMANFour and a half LIM domains 1 OS=Homo sapiens OX=9606 GN=FHL1 PE=1 SV=4	P	GO:0055014	atrial cardiac muscle cell development
L8HW49	FHL1_HUMANFour and a half LIM domains 1 OS=Homo sapiens OX=9606 GN=FHL1 PE=1 SV=4	P	GO:0055015	ventricular cardiac muscle cell development
L8HW49	FHL1_HUMANFour and a half LIM domains 1 OS=Homo sapiens OX=9606 GN=FHL1 PE=1 SV=4	P	GO:0060347	heart trabecula formation
L8HW49	FHL1_HUMANFour and a half LIM domains 1 OS=Homo sapiens OX=9606 GN=FHL1 PE=1 SV=4	P	GO:0070885	negative regulation of calcineurin-NFAT signaling cascade
L8HW49	FHL1_HUMANFour and a half LIM domains 1 OS=Homo sapiens OX=9606 GN=FHL1 PE=1 SV=4	P	GO:1901016	regulation of potassium ion transmembrane transporter activity
L8HW49	FHL1_HUMANFour and a half LIM domains 1 OS=Homo sapiens OX=9606 GN=FHL1 PE=1 SV=4	P	GO:2000134	negative regulation of G1/S transition of mitotic cell cycle
L8HW49	FHL1_HUMANFour and a half LIM domains 1 OS=Homo sapiens OX=9606 GN=FHL1 PE=1 SV=4	C	GO:0005667	transcription factor complex
L8HW49	FHL1_HUMANFour and a half LIM domains 1 OS=Homo sapiens OX=9606 GN=FHL1 PE=1 SV=4	P	GO:0045941	positive regulation of transcription, DNA-templated
L8IU59	CBPN_BOVINCarboxypeptidase N catalytic chain OS=Bos taurus OX=9913 GN=CPN1 PE=2 SV=1	C	GO:0005615	extracellular space
L8IU59	CBPN_BOVINCarboxypeptidase N catalytic chain OS=Bos taurus OX=9913 GN=CPN1 PE=2 SV=1	C	GO:0005794	Golgi apparatus
L8IU59	CBPN_BOVINCarboxypeptidase N catalytic chain OS=Bos taurus OX=9913 GN=CPN1 PE=2 SV=1	C	GO:0030425	dendrite
L8IU59	CBPN_BOVINCarboxypeptidase N catalytic chain OS=Bos taurus OX=9913 GN=CPN1 PE=2 SV=1	C	GO:0030667	secretory granule membrane
L8IU59	CBPN_BOVINCarboxypeptidase N catalytic chain OS=Bos taurus OX=9913 GN=CPN1 PE=2 SV=1	C	GO:0031045	dense core granule
L8IU59	CBPN_BOVINCarboxypeptidase N catalytic chain OS=Bos taurus OX=9913 GN=CPN1 PE=2 SV=1	C	GO:0043204	perikaryon
L8IU59	CBPN_BOVINCarboxypeptidase N catalytic chain OS=Bos taurus OX=9913 GN=CPN1 PE=2 SV=1	C	GO:0045121	membrane raft
L8IU59	CBPN_BOVINCarboxypeptidase N catalytic chain OS=Bos taurus OX=9913 GN=CPN1 PE=2 SV=1	C	GO:0097060	synaptic membrane
L8IU59	CBPN_BOVINCarboxypeptidase N catalytic chain OS=Bos taurus OX=9913 GN=CPN1 PE=2 SV=1	F	GO:0004181	metallocarboxypeptidase activity
L8IU59	CBPN_BOVINCarboxypeptidase N catalytic chain OS=Bos taurus OX=9913 GN=CPN1 PE=2 SV=1	F	GO:0008270	zinc ion binding
L8IU59	CBPN_BOVINCarboxypeptidase N catalytic chain OS=Bos taurus OX=9913 GN=CPN1 PE=2 SV=1	F	GO:0019904	protein domain specific binding
L8IU59	CBPN_BOVINCarboxypeptidase N catalytic chain OS=Bos taurus OX=9913 GN=CPN1 PE=2 SV=1	F	GO:0042043	neurexin family protein binding
L8IU59	CBPN_BOVINCarboxypeptidase N catalytic chain OS=Bos taurus OX=9913 GN=CPN1 PE=2 SV=1	F	GO:0050839	cell adhesion molecule binding
L8IU59	CBPN_BOVINCarboxypeptidase N catalytic chain OS=Bos taurus OX=9913 GN=CPN1 PE=2 SV=1	F	GO:0050897	cobalt ion binding
L8IU59	CBPN_BOVINCarboxypeptidase N catalytic chain OS=Bos taurus OX=9913 GN=CPN1 PE=2 SV=1	P	GO:0003214	cardiac left ventricle morphogenesis
L8IU59	CBPN_BOVINCarboxypeptidase N catalytic chain OS=Bos taurus OX=9913 GN=CPN1 PE=2 SV=1	P	GO:0010815	bradykinin catabolic process
L8IU59	CBPN_BOVINCarboxypeptidase N catalytic chain OS=Bos taurus OX=9913 GN=CPN1 PE=2 SV=1	P	GO:0016055	Wnt signaling pathway
L8IU59	CBPN_BOVINCarboxypeptidase N catalytic chain OS=Bos taurus OX=9913 GN=CPN1 PE=2 SV=1	P	GO:0030070	insulin processing
L8IU59	CBPN_BOVINCarboxypeptidase N catalytic chain OS=Bos taurus OX=9913 GN=CPN1 PE=2 SV=1	P	GO:0030072	peptide hormone secretion
L8IU59	CBPN_BOVINCarboxypeptidase N catalytic chain OS=Bos taurus OX=9913 GN=CPN1 PE=2 SV=1	P	GO:0030449	regulation of complement activation
L8IU59	CBPN_BOVINCarboxypeptidase N catalytic chain OS=Bos taurus OX=9913 GN=CPN1 PE=2 SV=1	P	GO:0034230	enkephalin processing
L8IU59	CBPN_BOVINCarboxypeptidase N catalytic chain OS=Bos taurus OX=9913 GN=CPN1 PE=2 SV=1	P	GO:0051384	response to glucocorticoid
L8IU59	CBPN_BOVINCarboxypeptidase N catalytic chain OS=Bos taurus OX=9913 GN=CPN1 PE=2 SV=1	P	GO:0072657	protein localization to membrane
L8IU59	CBPN_BOVINCarboxypeptidase N catalytic chain OS=Bos taurus OX=9913 GN=CPN1 PE=2 SV=1	P	GO:2000173	negative regulation of branching morphogenesis of a nerve
L8J2E7	CIAO3_BOVINCytosolic iron-sulfur assembly component 3 OS=Bos taurus OX=9913 GN=CIAO3 PE=2 SV=2	C	GO:0005638	lamin filament
L8J2E7	CIAO3_BOVINCytosolic iron-sulfur assembly component 3 OS=Bos taurus OX=9913 GN=CIAO3 PE=2 SV=2	C	GO:0005730	nucleolus
L8J2E7	CIAO3_BOVINCytosolic iron-sulfur assembly component 3 OS=Bos taurus OX=9913 GN=CIAO3 PE=2 SV=2	C	GO:0097361	CIA complex
L8J2E7	CIAO3_BOVINCytosolic iron-sulfur assembly component 3 OS=Bos taurus OX=9913 GN=CIAO3 PE=2 SV=2	F	GO:0005521	lamin binding
L8J2E7	CIAO3_BOVINCytosolic iron-sulfur assembly component 3 OS=Bos taurus OX=9913 GN=CIAO3 PE=2 SV=2	F	GO:0046872	metal ion binding
L8J2E7	CIAO3_BOVINCytosolic iron-sulfur assembly component 3 OS=Bos taurus OX=9913 GN=CIAO3 PE=2 SV=2	F	GO:0051539	4 iron, 4 sulfur cluster binding
L8J2E7	CIAO3_BOVINCytosolic iron-sulfur assembly component 3 OS=Bos taurus OX=9913 GN=CIAO3 PE=2 SV=2	P	GO:0001666	response to hypoxia
L8J2E7	CIAO3_BOVINCytosolic iron-sulfur assembly component 3 OS=Bos taurus OX=9913 GN=CIAO3 PE=2 SV=2	P	GO:0002244	hematopoietic progenitor cell differentiation
L8J2E7	CIAO3_BOVINCytosolic iron-sulfur assembly component 3 OS=Bos taurus OX=9913 GN=CIAO3 PE=2 SV=2	P	GO:0010468	regulation of gene expression
L8J2E7	CIAO3_BOVINCytosolic iron-sulfur assembly component 3 OS=Bos taurus OX=9913 GN=CIAO3 PE=2 SV=2	P	GO:0016226	iron-sulfur cluster assembly
L8J2E7	CIAO3_BOVINCytosolic iron-sulfur assembly component 3 OS=Bos taurus OX=9913 GN=CIAO3 PE=2 SV=2	P	GO:0032364	oxygen homeostasis
L8IQQ6	ANX10_HUMANAnnexin A10 OS=Homo sapiens OX=9606 GN=ANXA10 PE=1 SV=3	C	GO:0005654	nucleoplasm
L8IQQ6	ANX10_HUMANAnnexin A10 OS=Homo sapiens OX=9606 GN=ANXA10 PE=1 SV=3	C	GO:0005819	spindle
L8IQQ6	ANX10_HUMANAnnexin A10 OS=Homo sapiens OX=9606 GN=ANXA10 PE=1 SV=3	C	GO:0005829	cytosol
L8IQQ6	ANX10_HUMANAnnexin A10 OS=Homo sapiens OX=9606 GN=ANXA10 PE=1 SV=3	C	GO:0016324	apical plasma membrane
L8IQQ6	ANX10_HUMANAnnexin A10 OS=Homo sapiens OX=9606 GN=ANXA10 PE=1 SV=3	C	GO:0030424	axon
L8IQQ6	ANX10_HUMANAnnexin A10 OS=Homo sapiens OX=9606 GN=ANXA10 PE=1 SV=3	C	GO:0030425	dendrite
L8IQQ6	ANX10_HUMANAnnexin A10 OS=Homo sapiens OX=9606 GN=ANXA10 PE=1 SV=3	C	GO:0030496	midbody
L8IQQ6	ANX10_HUMANAnnexin A10 OS=Homo sapiens OX=9606 GN=ANXA10 PE=1 SV=3	C	GO:0030670	phagocytic vesicle membrane
L8IQQ6	ANX10_HUMANAnnexin A10 OS=Homo sapiens OX=9606 GN=ANXA10 PE=1 SV=3	C	GO:0042581	specific granule
L8IQQ6	ANX10_HUMANAnnexin A10 OS=Homo sapiens OX=9606 GN=ANXA10 PE=1 SV=3	C	GO:0042582	azurophil granule
L8IQQ6	ANX10_HUMANAnnexin A10 OS=Homo sapiens OX=9606 GN=ANXA10 PE=1 SV=3	C	GO:0042584	chromaffin granule membrane
L8IQQ6	ANX10_HUMANAnnexin A10 OS=Homo sapiens OX=9606 GN=ANXA10 PE=1 SV=3	C	GO:0043025	neuronal cell body
L8IQQ6	ANX10_HUMANAnnexin A10 OS=Homo sapiens OX=9606 GN=ANXA10 PE=1 SV=3	F	GO:0005509	calcium ion binding
L8IQQ6	ANX10_HUMANAnnexin A10 OS=Homo sapiens OX=9606 GN=ANXA10 PE=1 SV=3	F	GO:0005544	calcium-dependent phospholipid binding
L8IQQ6	ANX10_HUMANAnnexin A10 OS=Homo sapiens OX=9606 GN=ANXA10 PE=1 SV=3	F	GO:0008201	heparin binding
L8IQQ6	ANX10_HUMANAnnexin A10 OS=Homo sapiens OX=9606 GN=ANXA10 PE=1 SV=3	F	GO:0019834	phospholipase A2 inhibitor activity
L8IQQ6	ANX10_HUMANAnnexin A10 OS=Homo sapiens OX=9606 GN=ANXA10 PE=1 SV=3	F	GO:0030246	carbohydrate binding
L8IQQ6	ANX10_HUMANAnnexin A10 OS=Homo sapiens OX=9606 GN=ANXA10 PE=1 SV=3	F	GO:0035374	chondroitin sulfate binding
L8IQQ6	ANX10_HUMANAnnexin A10 OS=Homo sapiens OX=9606 GN=ANXA10 PE=1 SV=3	F	GO:0042802	identical protein binding
L8IQQ6	ANX10_HUMANAnnexin A10 OS=Homo sapiens OX=9606 GN=ANXA10 PE=1 SV=3	F	GO:0048306	calcium-dependent protein binding
L8IQQ6	ANX10_HUMANAnnexin A10 OS=Homo sapiens OX=9606 GN=ANXA10 PE=1 SV=3	P	GO:0006909	phagocytosis
L8IQQ6	ANX10_HUMANAnnexin A10 OS=Homo sapiens OX=9606 GN=ANXA10 PE=1 SV=3	P	GO:0007219	Notch signaling pathway
L8IQQ6	ANX10_HUMANAnnexin A10 OS=Homo sapiens OX=9606 GN=ANXA10 PE=1 SV=3	P	GO:0010595	positive regulation of endothelial cell migration
L8IQQ6	ANX10_HUMANAnnexin A10 OS=Homo sapiens OX=9606 GN=ANXA10 PE=1 SV=3	P	GO:0021766	hippocampus development
L8IQQ6	ANX10_HUMANAnnexin A10 OS=Homo sapiens OX=9606 GN=ANXA10 PE=1 SV=3	P	GO:0031100	animal organ regeneration
L8IQQ6	ANX10_HUMANAnnexin A10 OS=Homo sapiens OX=9606 GN=ANXA10 PE=1 SV=3	P	GO:0032506	cytokinetic process
L8IQQ6	ANX10_HUMANAnnexin A10 OS=Homo sapiens OX=9606 GN=ANXA10 PE=1 SV=3	P	GO:0042742	defense response to bacterium
L8IQQ6	ANX10_HUMANAnnexin A10 OS=Homo sapiens OX=9606 GN=ANXA10 PE=1 SV=3	P	GO:0043312	neutrophil degranulation
L8IQQ6	ANX10_HUMANAnnexin A10 OS=Homo sapiens OX=9606 GN=ANXA10 PE=1 SV=3	P	GO:0045766	positive regulation of angiogenesis
L8IQQ6	ANX10_HUMANAnnexin A10 OS=Homo sapiens OX=9606 GN=ANXA10 PE=1 SV=3	P	GO:0051054	positive regulation of DNA metabolic process
L8IQQ6	ANX10_HUMANAnnexin A10 OS=Homo sapiens OX=9606 GN=ANXA10 PE=1 SV=3	P	GO:0051091	positive regulation of DNA-binding transcription factor activity
L8IQQ6	ANX10_HUMANAnnexin A10 OS=Homo sapiens OX=9606 GN=ANXA10 PE=1 SV=3	P	GO:0051384	response to glucocorticoid
L8IQQ6	ANX10_HUMANAnnexin A10 OS=Homo sapiens OX=9606 GN=ANXA10 PE=1 SV=3	P	GO:0070848	response to growth factor
L8J197	ASAH1_BOVINAcid ceramidase OS=Bos taurus OX=9913 GN=ASAH1 PE=2 SV=3	C	GO:0005615	extracellular space
L8J197	ASAH1_BOVINAcid ceramidase OS=Bos taurus OX=9913 GN=ASAH1 PE=2 SV=3	C	GO:0005634	nucleus
L8J197	ASAH1_BOVINAcid ceramidase OS=Bos taurus OX=9913 GN=ASAH1 PE=2 SV=3	C	GO:0005769	early endosome
L8J197	ASAH1_BOVINAcid ceramidase OS=Bos taurus OX=9913 GN=ASAH1 PE=2 SV=3	C	GO:0005783	endoplasmic reticulum
L8J197	ASAH1_BOVINAcid ceramidase OS=Bos taurus OX=9913 GN=ASAH1 PE=2 SV=3	C	GO:0043202	lysosomal lumen
L8J197	ASAH1_BOVINAcid ceramidase OS=Bos taurus OX=9913 GN=ASAH1 PE=2 SV=3	C	GO:1904724	tertiary granule lumen
L8J197	ASAH1_BOVINAcid ceramidase OS=Bos taurus OX=9913 GN=ASAH1 PE=2 SV=3	C	GO:1904813	ficolin-1-rich granule lumen
L8J197	ASAH1_BOVINAcid ceramidase OS=Bos taurus OX=9913 GN=ASAH1 PE=2 SV=3	F	GO:0003714	transcription corepressor activity
L8J197	ASAH1_BOVINAcid ceramidase OS=Bos taurus OX=9913 GN=ASAH1 PE=2 SV=3	F	GO:0016922	nuclear receptor binding
L8J197	ASAH1_BOVINAcid ceramidase OS=Bos taurus OX=9913 GN=ASAH1 PE=2 SV=3	F	GO:0017040	N-acylsphingosine amidohydrolase activity
L8J197	ASAH1_BOVINAcid ceramidase OS=Bos taurus OX=9913 GN=ASAH1 PE=2 SV=3	F	GO:0102121	ceramidase activity
L8J197	ASAH1_BOVINAcid ceramidase OS=Bos taurus OX=9913 GN=ASAH1 PE=2 SV=3	P	GO:0006687	glycosphingolipid metabolic process
L8J197	ASAH1_BOVINAcid ceramidase OS=Bos taurus OX=9913 GN=ASAH1 PE=2 SV=3	P	GO:0030216	keratinocyte differentiation
L8J197	ASAH1_BOVINAcid ceramidase OS=Bos taurus OX=9913 GN=ASAH1 PE=2 SV=3	P	GO:0030324	lung development
L8J197	ASAH1_BOVINAcid ceramidase OS=Bos taurus OX=9913 GN=ASAH1 PE=2 SV=3	P	GO:0043312	neutrophil degranulation
L8J197	ASAH1_BOVINAcid ceramidase OS=Bos taurus OX=9913 GN=ASAH1 PE=2 SV=3	P	GO:0046512	sphingosine biosynthetic process
L8J197	ASAH1_BOVINAcid ceramidase OS=Bos taurus OX=9913 GN=ASAH1 PE=2 SV=3	P	GO:0046513	ceramide biosynthetic process
L8J197	ASAH1_BOVINAcid ceramidase OS=Bos taurus OX=9913 GN=ASAH1 PE=2 SV=3	P	GO:0046514	ceramide catabolic process
L8J197	ASAH1_BOVINAcid ceramidase OS=Bos taurus OX=9913 GN=ASAH1 PE=2 SV=3	P	GO:0050810	regulation of steroid biosynthetic process
L8J197	ASAH1_BOVINAcid ceramidase OS=Bos taurus OX=9913 GN=ASAH1 PE=2 SV=3	P	GO:0062098	regulation of programmed necrotic cell death
L8J197	ASAH1_BOVINAcid ceramidase OS=Bos taurus OX=9913 GN=ASAH1 PE=2 SV=3	P	GO:0071356	cellular response to tumor necrosis factor
L8J197	ASAH1_BOVINAcid ceramidase OS=Bos taurus OX=9913 GN=ASAH1 PE=2 SV=3	C	GO:0005667	transcription factor complex
L8J197	ASAH1_BOVINAcid ceramidase OS=Bos taurus OX=9913 GN=ASAH1 PE=2 SV=3	P	GO:0016481	negative regulation of transcription, DNA-templated
L8J197	ASAH1_BOVINAcid ceramidase OS=Bos taurus OX=9913 GN=ASAH1 PE=2 SV=3	P	GO:0007165	signal transduction
L8I899	INCE_HUMANInner centromere OS=Homo sapiens OX=9606 GN=INCENP PE=1 SV=3	C	GO:0000777	condensed chromosome kinetochore
L8I899	INCE_HUMANInner centromere OS=Homo sapiens OX=9606 GN=INCENP PE=1 SV=3	C	GO:0000800	lateral element
L8I899	INCE_HUMANInner centromere OS=Homo sapiens OX=9606 GN=INCENP PE=1 SV=3	C	GO:0000801	central element
L8I899	INCE_HUMANInner centromere OS=Homo sapiens OX=9606 GN=INCENP PE=1 SV=3	C	GO:0005721	pericentric heterochromatin
L8I899	INCE_HUMANInner centromere OS=Homo sapiens OX=9606 GN=INCENP PE=1 SV=3	C	GO:0005819	spindle
L8I899	INCE_HUMANInner centromere OS=Homo sapiens OX=9606 GN=INCENP PE=1 SV=3	C	GO:0005829	cytosol
L8I899	INCE_HUMANInner centromere OS=Homo sapiens OX=9606 GN=INCENP PE=1 SV=3	C	GO:0005874	microtubule
L8I899	INCE_HUMANInner centromere OS=Homo sapiens OX=9606 GN=INCENP PE=1 SV=3	C	GO:0010369	chromocenter
L8I899	INCE_HUMANInner centromere OS=Homo sapiens OX=9606 GN=INCENP PE=1 SV=3	C	GO:0016604	nuclear body
L8I899	INCE_HUMANInner centromere OS=Homo sapiens OX=9606 GN=INCENP PE=1 SV=3	C	GO:0030496	midbody
L8I899	INCE_HUMANInner centromere OS=Homo sapiens OX=9606 GN=INCENP PE=1 SV=3	F	GO:0005515	protein binding
L8I899	INCE_HUMANInner centromere OS=Homo sapiens OX=9606 GN=INCENP PE=1 SV=3	P	GO:0000070	mitotic sister chromatid segregation
L8I899	INCE_HUMANInner centromere OS=Homo sapiens OX=9606 GN=INCENP PE=1 SV=3	P	GO:1902412	regulation of mitotic cytokinesis
L8J0U4	ALDOC_MACFAFructose-bisphosphate aldolase C OS=Macaca fascicularis OX=9541 GN=ALDOC PE=2 SV=3	C	GO:0005720	nuclear heterochromatin
L8J0U4	ALDOC_MACFAFructose-bisphosphate aldolase C OS=Macaca fascicularis OX=9541 GN=ALDOC PE=2 SV=3	C	GO:0005739	mitochondrion
L8J0U4	ALDOC_MACFAFructose-bisphosphate aldolase C OS=Macaca fascicularis OX=9541 GN=ALDOC PE=2 SV=3	C	GO:0005886	plasma membrane
L8J0U4	ALDOC_MACFAFructose-bisphosphate aldolase C OS=Macaca fascicularis OX=9541 GN=ALDOC PE=2 SV=3	C	GO:0015629	actin cytoskeleton
L8J0U4	ALDOC_MACFAFructose-bisphosphate aldolase C OS=Macaca fascicularis OX=9541 GN=ALDOC PE=2 SV=3	C	GO:0030018	Z disc
L8J0U4	ALDOC_MACFAFructose-bisphosphate aldolase C OS=Macaca fascicularis OX=9541 GN=ALDOC PE=2 SV=3	C	GO:0030424	axon
L8J0U4	ALDOC_MACFAFructose-bisphosphate aldolase C OS=Macaca fascicularis OX=9541 GN=ALDOC PE=2 SV=3	C	GO:0031430	M band
L8J0U4	ALDOC_MACFAFructose-bisphosphate aldolase C OS=Macaca fascicularis OX=9541 GN=ALDOC PE=2 SV=3	C	GO:0032991	protein-containing complex
L8J0U4	ALDOC_MACFAFructose-bisphosphate aldolase C OS=Macaca fascicularis OX=9541 GN=ALDOC PE=2 SV=3	C	GO:0034774	secretory granule lumen
L8J0U4	ALDOC_MACFAFructose-bisphosphate aldolase C OS=Macaca fascicularis OX=9541 GN=ALDOC PE=2 SV=3	C	GO:0035686	sperm fibrous sheath
L8J0U4	ALDOC_MACFAFructose-bisphosphate aldolase C OS=Macaca fascicularis OX=9541 GN=ALDOC PE=2 SV=3	C	GO:0061827	sperm head
L8J0U4	ALDOC_MACFAFructose-bisphosphate aldolase C OS=Macaca fascicularis OX=9541 GN=ALDOC PE=2 SV=3	C	GO:0070062	extracellular exosome
L8J0U4	ALDOC_MACFAFructose-bisphosphate aldolase C OS=Macaca fascicularis OX=9541 GN=ALDOC PE=2 SV=3	C	GO:0099524	postsynaptic cytosol
L8J0U4	ALDOC_MACFAFructose-bisphosphate aldolase C OS=Macaca fascicularis OX=9541 GN=ALDOC PE=2 SV=3	C	GO:1904724	tertiary granule lumen
L8J0U4	ALDOC_MACFAFructose-bisphosphate aldolase C OS=Macaca fascicularis OX=9541 GN=ALDOC PE=2 SV=3	C	GO:1904813	ficolin-1-rich granule lumen
L8J0U4	ALDOC_MACFAFructose-bisphosphate aldolase C OS=Macaca fascicularis OX=9541 GN=ALDOC PE=2 SV=3	F	GO:0002020	protease binding
L8J0U4	ALDOC_MACFAFructose-bisphosphate aldolase C OS=Macaca fascicularis OX=9541 GN=ALDOC PE=2 SV=3	F	GO:0004332	fructose-bisphosphate aldolase activity
L8J0U4	ALDOC_MACFAFructose-bisphosphate aldolase C OS=Macaca fascicularis OX=9541 GN=ALDOC PE=2 SV=3	F	GO:0008092	cytoskeletal protein binding
L8J0U4	ALDOC_MACFAFructose-bisphosphate aldolase C OS=Macaca fascicularis OX=9541 GN=ALDOC PE=2 SV=3	F	GO:0042802	identical protein binding
L8J0U4	ALDOC_MACFAFructose-bisphosphate aldolase C OS=Macaca fascicularis OX=9541 GN=ALDOC PE=2 SV=3	F	GO:0070061	fructose binding
L8J0U4	ALDOC_MACFAFructose-bisphosphate aldolase C OS=Macaca fascicularis OX=9541 GN=ALDOC PE=2 SV=3	P	GO:0001666	response to hypoxia
L8J0U4	ALDOC_MACFAFructose-bisphosphate aldolase C OS=Macaca fascicularis OX=9541 GN=ALDOC PE=2 SV=3	P	GO:0006000	fructose metabolic process
L8J0U4	ALDOC_MACFAFructose-bisphosphate aldolase C OS=Macaca fascicularis OX=9541 GN=ALDOC PE=2 SV=3	P	GO:0006094	gluconeogenesis
L8J0U4	ALDOC_MACFAFructose-bisphosphate aldolase C OS=Macaca fascicularis OX=9541 GN=ALDOC PE=2 SV=3	P	GO:0006754	ATP biosynthetic process
L8J0U4	ALDOC_MACFAFructose-bisphosphate aldolase C OS=Macaca fascicularis OX=9541 GN=ALDOC PE=2 SV=3	P	GO:0006915	apoptotic process
L8J0U4	ALDOC_MACFAFructose-bisphosphate aldolase C OS=Macaca fascicularis OX=9541 GN=ALDOC PE=2 SV=3	P	GO:0006941	striated muscle contraction
L8J0U4	ALDOC_MACFAFructose-bisphosphate aldolase C OS=Macaca fascicularis OX=9541 GN=ALDOC PE=2 SV=3	P	GO:0007339	binding of sperm to zona pellucida
L8J0U4	ALDOC_MACFAFructose-bisphosphate aldolase C OS=Macaca fascicularis OX=9541 GN=ALDOC PE=2 SV=3	P	GO:0007568	aging
L8J0U4	ALDOC_MACFAFructose-bisphosphate aldolase C OS=Macaca fascicularis OX=9541 GN=ALDOC PE=2 SV=3	P	GO:0008360	regulation of cell shape
L8J0U4	ALDOC_MACFAFructose-bisphosphate aldolase C OS=Macaca fascicularis OX=9541 GN=ALDOC PE=2 SV=3	P	GO:0009408	response to heat
L8J0U4	ALDOC_MACFAFructose-bisphosphate aldolase C OS=Macaca fascicularis OX=9541 GN=ALDOC PE=2 SV=3	P	GO:0010243	response to organonitrogen compound
L8J0U4	ALDOC_MACFAFructose-bisphosphate aldolase C OS=Macaca fascicularis OX=9541 GN=ALDOC PE=2 SV=3	P	GO:0014070	response to organic cyclic compound
L8J0U4	ALDOC_MACFAFructose-bisphosphate aldolase C OS=Macaca fascicularis OX=9541 GN=ALDOC PE=2 SV=3	P	GO:0019242	methylglyoxal biosynthetic process
L8J0U4	ALDOC_MACFAFructose-bisphosphate aldolase C OS=Macaca fascicularis OX=9541 GN=ALDOC PE=2 SV=3	P	GO:0030335	positive regulation of cell migration
L8J0U4	ALDOC_MACFAFructose-bisphosphate aldolase C OS=Macaca fascicularis OX=9541 GN=ALDOC PE=2 SV=3	P	GO:0030388	fructose 1,6-bisphosphate metabolic process
L8J0U4	ALDOC_MACFAFructose-bisphosphate aldolase C OS=Macaca fascicularis OX=9541 GN=ALDOC PE=2 SV=3	P	GO:0030855	epithelial cell differentiation
L8J0U4	ALDOC_MACFAFructose-bisphosphate aldolase C OS=Macaca fascicularis OX=9541 GN=ALDOC PE=2 SV=3	P	GO:0031100	animal organ regeneration
L8J0U4	ALDOC_MACFAFructose-bisphosphate aldolase C OS=Macaca fascicularis OX=9541 GN=ALDOC PE=2 SV=3	P	GO:0032496	response to lipopolysaccharide
L8J0U4	ALDOC_MACFAFructose-bisphosphate aldolase C OS=Macaca fascicularis OX=9541 GN=ALDOC PE=2 SV=3	P	GO:0034316	negative regulation of Arp2/3 complex-mediated actin nucleation
L8J0U4	ALDOC_MACFAFructose-bisphosphate aldolase C OS=Macaca fascicularis OX=9541 GN=ALDOC PE=2 SV=3	P	GO:0035094	response to nicotine
L8J0U4	ALDOC_MACFAFructose-bisphosphate aldolase C OS=Macaca fascicularis OX=9541 GN=ALDOC PE=2 SV=3	P	GO:0043312	neutrophil degranulation
L8J0U4	ALDOC_MACFAFructose-bisphosphate aldolase C OS=Macaca fascicularis OX=9541 GN=ALDOC PE=2 SV=3	P	GO:0043627	response to estrogen
L8J0U4	ALDOC_MACFAFructose-bisphosphate aldolase C OS=Macaca fascicularis OX=9541 GN=ALDOC PE=2 SV=3	P	GO:0046716	muscle cell cellular homeostasis
L8J0U4	ALDOC_MACFAFructose-bisphosphate aldolase C OS=Macaca fascicularis OX=9541 GN=ALDOC PE=2 SV=3	P	GO:0051289	protein homotetramerization
L8J0U4	ALDOC_MACFAFructose-bisphosphate aldolase C OS=Macaca fascicularis OX=9541 GN=ALDOC PE=2 SV=3	P	GO:0051290	protein heterotetramerization
L8J0U4	ALDOC_MACFAFructose-bisphosphate aldolase C OS=Macaca fascicularis OX=9541 GN=ALDOC PE=2 SV=3	P	GO:0061621	canonical glycolysis
L8J0U4	ALDOC_MACFAFructose-bisphosphate aldolase C OS=Macaca fascicularis OX=9541 GN=ALDOC PE=2 SV=3	P	GO:0006013	mannose metabolic process
L8J0U4	ALDOC_MACFAFructose-bisphosphate aldolase C OS=Macaca fascicularis OX=9541 GN=ALDOC PE=2 SV=3	P	GO:0006020	inositol metabolic process
L8J0U4	ALDOC_MACFAFructose-bisphosphate aldolase C OS=Macaca fascicularis OX=9541 GN=ALDOC PE=2 SV=3	P	GO:0006098	pentose-phosphate shunt
L8J0U4	ALDOC_MACFAFructose-bisphosphate aldolase C OS=Macaca fascicularis OX=9541 GN=ALDOC PE=2 SV=3	P	GO:0015976	carbon utilization
L8ICJ2	FKB10_BOVINPeptidyl-prolyl cis-trans isomerase FKBP10 OS=Bos taurus OX=9913 GN=FKBP10 PE=2 SV=1	C	GO:0005730	nucleolus
L8ICJ2	FKB10_BOVINPeptidyl-prolyl cis-trans isomerase FKBP10 OS=Bos taurus OX=9913 GN=FKBP10 PE=2 SV=1	C	GO:0005788	endoplasmic reticulum lumen
L8ICJ2	FKB10_BOVINPeptidyl-prolyl cis-trans isomerase FKBP10 OS=Bos taurus OX=9913 GN=FKBP10 PE=2 SV=1	C	GO:0005829	cytosol
L8ICJ2	FKB10_BOVINPeptidyl-prolyl cis-trans isomerase FKBP10 OS=Bos taurus OX=9913 GN=FKBP10 PE=2 SV=1	C	GO:0016020	membrane
L8ICJ2	FKB10_BOVINPeptidyl-prolyl cis-trans isomerase FKBP10 OS=Bos taurus OX=9913 GN=FKBP10 PE=2 SV=1	F	GO:0003755	peptidyl-prolyl cis-trans isomerase activity
L8ICJ2	FKB10_BOVINPeptidyl-prolyl cis-trans isomerase FKBP10 OS=Bos taurus OX=9913 GN=FKBP10 PE=2 SV=1	F	GO:0005509	calcium ion binding
L8ICJ2	FKB10_BOVINPeptidyl-prolyl cis-trans isomerase FKBP10 OS=Bos taurus OX=9913 GN=FKBP10 PE=2 SV=1	F	GO:0005515	protein binding
L8ICJ2	FKB10_BOVINPeptidyl-prolyl cis-trans isomerase FKBP10 OS=Bos taurus OX=9913 GN=FKBP10 PE=2 SV=1	F	GO:0005528	FK506 binding
L8ICJ2	FKB10_BOVINPeptidyl-prolyl cis-trans isomerase FKBP10 OS=Bos taurus OX=9913 GN=FKBP10 PE=2 SV=1	P	GO:0000412	histone peptidyl-prolyl isomerization
L8ICJ2	FKB10_BOVINPeptidyl-prolyl cis-trans isomerase FKBP10 OS=Bos taurus OX=9913 GN=FKBP10 PE=2 SV=1	P	GO:0006457	protein folding
L8INB2	FBLN4_MOUSEEGF-containing fibulin-like extracellular matrix 2 OS=Mus musculus OX=10090 GN=Efemp2 PE=1 SV=1	C	GO:0005604	basement membrane
L8INB2	FBLN4_MOUSEEGF-containing fibulin-like extracellular matrix 2 OS=Mus musculus OX=10090 GN=Efemp2 PE=1 SV=1	C	GO:0005615	extracellular space
L8INB2	FBLN4_MOUSEEGF-containing fibulin-like extracellular matrix 2 OS=Mus musculus OX=10090 GN=Efemp2 PE=1 SV=1	C	GO:0005737	cytoplasm
L8INB2	FBLN4_MOUSEEGF-containing fibulin-like extracellular matrix 2 OS=Mus musculus OX=10090 GN=Efemp2 PE=1 SV=1	F	GO:0005178	integrin binding
L8INB2	FBLN4_MOUSEEGF-containing fibulin-like extracellular matrix 2 OS=Mus musculus OX=10090 GN=Efemp2 PE=1 SV=1	F	GO:0005509	calcium ion binding
L8INB2	FBLN4_MOUSEEGF-containing fibulin-like extracellular matrix 2 OS=Mus musculus OX=10090 GN=Efemp2 PE=1 SV=1	F	GO:0030023	extracellular matrix constituent conferring elasticity
L8INB2	FBLN4_MOUSEEGF-containing fibulin-like extracellular matrix 2 OS=Mus musculus OX=10090 GN=Efemp2 PE=1 SV=1	F	GO:0042803	protein homodimerization activity
L8INB2	FBLN4_MOUSEEGF-containing fibulin-like extracellular matrix 2 OS=Mus musculus OX=10090 GN=Efemp2 PE=1 SV=1	P	GO:0008284	positive regulation of cell population proliferation
L8INB2	FBLN4_MOUSEEGF-containing fibulin-like extracellular matrix 2 OS=Mus musculus OX=10090 GN=Efemp2 PE=1 SV=1	P	GO:0010977	negative regulation of neuron projection development
L8INB2	FBLN4_MOUSEEGF-containing fibulin-like extracellular matrix 2 OS=Mus musculus OX=10090 GN=Efemp2 PE=1 SV=1	P	GO:0018108	peptidyl-tyrosine phosphorylation
L8INB2	FBLN4_MOUSEEGF-containing fibulin-like extracellular matrix 2 OS=Mus musculus OX=10090 GN=Efemp2 PE=1 SV=1	P	GO:0031346	positive regulation of cell projection organization
L8INB2	FBLN4_MOUSEEGF-containing fibulin-like extracellular matrix 2 OS=Mus musculus OX=10090 GN=Efemp2 PE=1 SV=1	P	GO:0043010	camera-type eye development
L8INB2	FBLN4_MOUSEEGF-containing fibulin-like extracellular matrix 2 OS=Mus musculus OX=10090 GN=Efemp2 PE=1 SV=1	P	GO:0048251	elastic fiber assembly
L8INB2	FBLN4_MOUSEEGF-containing fibulin-like extracellular matrix 2 OS=Mus musculus OX=10090 GN=Efemp2 PE=1 SV=1	P	GO:0060840	artery development
L8INB2	FBLN4_MOUSEEGF-containing fibulin-like extracellular matrix 2 OS=Mus musculus OX=10090 GN=Efemp2 PE=1 SV=1	P	GO:1903975	regulation of glial cell migration
L8INB2	FBLN4_MOUSEEGF-containing fibulin-like extracellular matrix 2 OS=Mus musculus OX=10090 GN=Efemp2 PE=1 SV=1	P	GO:0007165	signal transduction
L8INB2	FBLN4_MOUSEEGF-containing fibulin-like extracellular matrix 2 OS=Mus musculus OX=10090 GN=Efemp2 PE=1 SV=1	C	GO:0008305	integrin complex
L8INB2	FBLN4_MOUSEEGF-containing fibulin-like extracellular matrix 2 OS=Mus musculus OX=10090 GN=Efemp2 PE=1 SV=1	C	GO:0005578	extracellular matrix
L8IJS0	H10_BOVINHistone OS=Bos taurus OX=9913 GN=H1-0 PE=2 SV=3	C	GO:0000786	nucleosome
L8IJS0	H10_BOVINHistone OS=Bos taurus OX=9913 GN=H1-0 PE=2 SV=3	C	GO:0000794	condensed nuclear chromosome
L8IJS0	H10_BOVINHistone OS=Bos taurus OX=9913 GN=H1-0 PE=2 SV=3	C	GO:0005719	nuclear euchromatin
L8IJS0	H10_BOVINHistone OS=Bos taurus OX=9913 GN=H1-0 PE=2 SV=3	C	GO:0005730	nucleolus
L8IJS0	H10_BOVINHistone OS=Bos taurus OX=9913 GN=H1-0 PE=2 SV=3	C	GO:0005794	Golgi apparatus
L8IJS0	H10_BOVINHistone OS=Bos taurus OX=9913 GN=H1-0 PE=2 SV=3	C	GO:0015629	actin cytoskeleton
L8IJS0	H10_BOVINHistone OS=Bos taurus OX=9913 GN=H1-0 PE=2 SV=3	C	GO:0016604	nuclear body
L8IJS0	H10_BOVINHistone OS=Bos taurus OX=9913 GN=H1-0 PE=2 SV=3	C	GO:0017053	transcriptional repressor complex
L8IJS0	H10_BOVINHistone OS=Bos taurus OX=9913 GN=H1-0 PE=2 SV=3	F	GO:0003680	AT DNA binding
L8IJS0	H10_BOVINHistone OS=Bos taurus OX=9913 GN=H1-0 PE=2 SV=3	F	GO:0005515	protein binding
L8IJS0	H10_BOVINHistone OS=Bos taurus OX=9913 GN=H1-0 PE=2 SV=3	F	GO:0031492	nucleosomal DNA binding
L8IJS0	H10_BOVINHistone OS=Bos taurus OX=9913 GN=H1-0 PE=2 SV=3	F	GO:0032559	adenyl ribonucleotide binding
L8IJS0	H10_BOVINHistone OS=Bos taurus OX=9913 GN=H1-0 PE=2 SV=3	F	GO:0043168	anion binding
L8IJS0	H10_BOVINHistone OS=Bos taurus OX=9913 GN=H1-0 PE=2 SV=3	P	GO:0000122	negative regulation of transcription by RNA polymerase II
L8IJS0	H10_BOVINHistone OS=Bos taurus OX=9913 GN=H1-0 PE=2 SV=3	P	GO:0006309	apoptotic DNA fragmentation
L8IJS0	H10_BOVINHistone OS=Bos taurus OX=9913 GN=H1-0 PE=2 SV=3	P	GO:0006334	nucleosome assembly
L8IJS0	H10_BOVINHistone OS=Bos taurus OX=9913 GN=H1-0 PE=2 SV=3	P	GO:0007283	spermatogenesis
L8IJS0	H10_BOVINHistone OS=Bos taurus OX=9913 GN=H1-0 PE=2 SV=3	P	GO:0007339	binding of sperm to zona pellucida
L8IJS0	H10_BOVINHistone OS=Bos taurus OX=9913 GN=H1-0 PE=2 SV=3	P	GO:0016584	nucleosome positioning
L8IJS0	H10_BOVINHistone OS=Bos taurus OX=9913 GN=H1-0 PE=2 SV=3	P	GO:0030261	chromosome condensation
L8IJS0	H10_BOVINHistone OS=Bos taurus OX=9913 GN=H1-0 PE=2 SV=3	P	GO:0030317	flagellated sperm motility
L8IJS0	H10_BOVINHistone OS=Bos taurus OX=9913 GN=H1-0 PE=2 SV=3	P	GO:0031936	negative regulation of chromatin silencing
L8IJS0	H10_BOVINHistone OS=Bos taurus OX=9913 GN=H1-0 PE=2 SV=3	P	GO:0045910	negative regulation of DNA recombination
L8IJS0	H10_BOVINHistone OS=Bos taurus OX=9913 GN=H1-0 PE=2 SV=3	P	GO:0080182	histone H3-K4 trimethylation
L8IJS0	H10_BOVINHistone OS=Bos taurus OX=9913 GN=H1-0 PE=2 SV=3	P	GO:0098532	histone H3-K27 trimethylation
L8IJS0	H10_BOVINHistone OS=Bos taurus OX=9913 GN=H1-0 PE=2 SV=3	P	GO:2000679	positive regulation of transcription regulatory region DNA binding
L8IWC2	FBLN3_MACFAEGF-containing fibulin-like extracellular matrix 1 OS=Macaca fascicularis OX=9541 GN=EFEMP1 PE=2 SV=1	C	GO:0005604	basement membrane
L8IWC2	FBLN3_MACFAEGF-containing fibulin-like extracellular matrix 1 OS=Macaca fascicularis OX=9541 GN=EFEMP1 PE=2 SV=1	C	GO:0005615	extracellular space
L8IWC2	FBLN3_MACFAEGF-containing fibulin-like extracellular matrix 1 OS=Macaca fascicularis OX=9541 GN=EFEMP1 PE=2 SV=1	C	GO:0005737	cytoplasm
L8IWC2	FBLN3_MACFAEGF-containing fibulin-like extracellular matrix 1 OS=Macaca fascicularis OX=9541 GN=EFEMP1 PE=2 SV=1	C	GO:0071953	elastic fiber
L8IWC2	FBLN3_MACFAEGF-containing fibulin-like extracellular matrix 1 OS=Macaca fascicularis OX=9541 GN=EFEMP1 PE=2 SV=1	F	GO:0005006	epidermal growth factor-activated receptor activity
L8IWC2	FBLN3_MACFAEGF-containing fibulin-like extracellular matrix 1 OS=Macaca fascicularis OX=9541 GN=EFEMP1 PE=2 SV=1	F	GO:0005154	epidermal growth factor receptor binding
L8IWC2	FBLN3_MACFAEGF-containing fibulin-like extracellular matrix 1 OS=Macaca fascicularis OX=9541 GN=EFEMP1 PE=2 SV=1	F	GO:0005201	extracellular matrix structural constituent
L8IWC2	FBLN3_MACFAEGF-containing fibulin-like extracellular matrix 1 OS=Macaca fascicularis OX=9541 GN=EFEMP1 PE=2 SV=1	F	GO:0005509	calcium ion binding
L8IWC2	FBLN3_MACFAEGF-containing fibulin-like extracellular matrix 1 OS=Macaca fascicularis OX=9541 GN=EFEMP1 PE=2 SV=1	F	GO:0008083	growth factor activity
L8IWC2	FBLN3_MACFAEGF-containing fibulin-like extracellular matrix 1 OS=Macaca fascicularis OX=9541 GN=EFEMP1 PE=2 SV=1	P	GO:0001558	regulation of cell growth
L8IWC2	FBLN3_MACFAEGF-containing fibulin-like extracellular matrix 1 OS=Macaca fascicularis OX=9541 GN=EFEMP1 PE=2 SV=1	P	GO:0006355	regulation of transcription, DNA-templated
L8IWC2	FBLN3_MACFAEGF-containing fibulin-like extracellular matrix 1 OS=Macaca fascicularis OX=9541 GN=EFEMP1 PE=2 SV=1	P	GO:0007173	epidermal growth factor receptor signaling pathway
L8IWC2	FBLN3_MACFAEGF-containing fibulin-like extracellular matrix 1 OS=Macaca fascicularis OX=9541 GN=EFEMP1 PE=2 SV=1	P	GO:0008284	positive regulation of cell population proliferation
L8IWC2	FBLN3_MACFAEGF-containing fibulin-like extracellular matrix 1 OS=Macaca fascicularis OX=9541 GN=EFEMP1 PE=2 SV=1	P	GO:0010977	negative regulation of neuron projection development
L8IWC2	FBLN3_MACFAEGF-containing fibulin-like extracellular matrix 1 OS=Macaca fascicularis OX=9541 GN=EFEMP1 PE=2 SV=1	P	GO:0018108	peptidyl-tyrosine phosphorylation
L8IWC2	FBLN3_MACFAEGF-containing fibulin-like extracellular matrix 1 OS=Macaca fascicularis OX=9541 GN=EFEMP1 PE=2 SV=1	P	GO:0030198	extracellular matrix organization
L8IWC2	FBLN3_MACFAEGF-containing fibulin-like extracellular matrix 1 OS=Macaca fascicularis OX=9541 GN=EFEMP1 PE=2 SV=1	P	GO:0031346	positive regulation of cell projection organization
L8IWC2	FBLN3_MACFAEGF-containing fibulin-like extracellular matrix 1 OS=Macaca fascicularis OX=9541 GN=EFEMP1 PE=2 SV=1	P	GO:0032331	negative regulation of chondrocyte differentiation
L8IWC2	FBLN3_MACFAEGF-containing fibulin-like extracellular matrix 1 OS=Macaca fascicularis OX=9541 GN=EFEMP1 PE=2 SV=1	P	GO:0034394	protein localization to cell surface
L8IWC2	FBLN3_MACFAEGF-containing fibulin-like extracellular matrix 1 OS=Macaca fascicularis OX=9541 GN=EFEMP1 PE=2 SV=1	P	GO:0043010	camera-type eye development
L8IWC2	FBLN3_MACFAEGF-containing fibulin-like extracellular matrix 1 OS=Macaca fascicularis OX=9541 GN=EFEMP1 PE=2 SV=1	P	GO:0048048	embryonic eye morphogenesis
L8IWC2	FBLN3_MACFAEGF-containing fibulin-like extracellular matrix 1 OS=Macaca fascicularis OX=9541 GN=EFEMP1 PE=2 SV=1	P	GO:0060840	artery development
L8IWC2	FBLN3_MACFAEGF-containing fibulin-like extracellular matrix 1 OS=Macaca fascicularis OX=9541 GN=EFEMP1 PE=2 SV=1	P	GO:1903975	regulation of glial cell migration
L8IWC2	FBLN3_MACFAEGF-containing fibulin-like extracellular matrix 1 OS=Macaca fascicularis OX=9541 GN=EFEMP1 PE=2 SV=1	C	GO:0005578	extracellular matrix
L8HZL7	GPC4_HUMANGlypican-4 OS=Homo sapiens OX=9606 GN=GPC4 PE=1 SV=4	C	GO:0005615	extracellular space
L8HZL7	GPC4_HUMANGlypican-4 OS=Homo sapiens OX=9606 GN=GPC4 PE=1 SV=4	C	GO:0005634	nucleus
L8HZL7	GPC4_HUMANGlypican-4 OS=Homo sapiens OX=9606 GN=GPC4 PE=1 SV=4	C	GO:0005783	endoplasmic reticulum
L8HZL7	GPC4_HUMANGlypican-4 OS=Homo sapiens OX=9606 GN=GPC4 PE=1 SV=4	C	GO:0005796	Golgi lumen
L8HZL7	GPC4_HUMANGlypican-4 OS=Homo sapiens OX=9606 GN=GPC4 PE=1 SV=4	C	GO:0005887	integral component of plasma membrane
L8HZL7	GPC4_HUMANGlypican-4 OS=Homo sapiens OX=9606 GN=GPC4 PE=1 SV=4	C	GO:0009897	external side of plasma membrane
L8HZL7	GPC4_HUMANGlypican-4 OS=Homo sapiens OX=9606 GN=GPC4 PE=1 SV=4	C	GO:0043025	neuronal cell body
L8HZL7	GPC4_HUMANGlypican-4 OS=Homo sapiens OX=9606 GN=GPC4 PE=1 SV=4	C	GO:0043202	lysosomal lumen
L8HZL7	GPC4_HUMANGlypican-4 OS=Homo sapiens OX=9606 GN=GPC4 PE=1 SV=4	C	GO:0045121	membrane raft
L8HZL7	GPC4_HUMANGlypican-4 OS=Homo sapiens OX=9606 GN=GPC4 PE=1 SV=4	C	GO:0062023	collagen-containing extracellular matrix
L8HZL7	GPC4_HUMANGlypican-4 OS=Homo sapiens OX=9606 GN=GPC4 PE=1 SV=4	C	GO:0098978	glutamatergic synapse
L8HZL7	GPC4_HUMANGlypican-4 OS=Homo sapiens OX=9606 GN=GPC4 PE=1 SV=4	C	GO:0099026	anchored component of presynaptic membrane
L8HZL7	GPC4_HUMANGlypican-4 OS=Homo sapiens OX=9606 GN=GPC4 PE=1 SV=4	F	GO:0017134	fibroblast growth factor binding
L8HZL7	GPC4_HUMANGlypican-4 OS=Homo sapiens OX=9606 GN=GPC4 PE=1 SV=4	F	GO:0043236	laminin binding
L8HZL7	GPC4_HUMANGlypican-4 OS=Homo sapiens OX=9606 GN=GPC4 PE=1 SV=4	F	GO:0070052	collagen V binding
L8HZL7	GPC4_HUMANGlypican-4 OS=Homo sapiens OX=9606 GN=GPC4 PE=1 SV=4	F	GO:1904929	coreceptor activity involved in Wnt signaling pathway, planar cell polarity pathway
L8HZL7	GPC4_HUMANGlypican-4 OS=Homo sapiens OX=9606 GN=GPC4 PE=1 SV=4	P	GO:0001523	retinoid metabolic process
L8HZL7	GPC4_HUMANGlypican-4 OS=Homo sapiens OX=9606 GN=GPC4 PE=1 SV=4	P	GO:0006024	glycosaminoglycan biosynthetic process
L8HZL7	GPC4_HUMANGlypican-4 OS=Homo sapiens OX=9606 GN=GPC4 PE=1 SV=4	P	GO:0006027	glycosaminoglycan catabolic process
L8HZL7	GPC4_HUMANGlypican-4 OS=Homo sapiens OX=9606 GN=GPC4 PE=1 SV=4	P	GO:0014037	Schwann cell differentiation
L8HZL7	GPC4_HUMANGlypican-4 OS=Homo sapiens OX=9606 GN=GPC4 PE=1 SV=4	P	GO:0016477	cell migration
L8HZL7	GPC4_HUMANGlypican-4 OS=Homo sapiens OX=9606 GN=GPC4 PE=1 SV=4	P	GO:0032288	myelin assembly
L8HZL7	GPC4_HUMANGlypican-4 OS=Homo sapiens OX=9606 GN=GPC4 PE=1 SV=4	P	GO:0040037	negative regulation of fibroblast growth factor receptor signaling pathway
L8HZL7	GPC4_HUMANGlypican-4 OS=Homo sapiens OX=9606 GN=GPC4 PE=1 SV=4	P	GO:0048699	generation of neurons
L8HZL7	GPC4_HUMANGlypican-4 OS=Homo sapiens OX=9606 GN=GPC4 PE=1 SV=4	P	GO:0060071	Wnt signaling pathway, planar cell polarity pathway
L8HZL7	GPC4_HUMANGlypican-4 OS=Homo sapiens OX=9606 GN=GPC4 PE=1 SV=4	P	GO:0098696	regulation of neurotransmitter receptor localization to postsynaptic specialization membrane
L8HZL7	GPC4_HUMANGlypican-4 OS=Homo sapiens OX=9606 GN=GPC4 PE=1 SV=4	P	GO:0099560	synaptic membrane adhesion
L8HZL7	GPC4_HUMANGlypican-4 OS=Homo sapiens OX=9606 GN=GPC4 PE=1 SV=4	P	GO:1905606	regulation of presynapse assembly
L8HZL7	GPC4_HUMANGlypican-4 OS=Homo sapiens OX=9606 GN=GPC4 PE=1 SV=4	P	GO:2001016	positive regulation of skeletal muscle cell differentiation
L8IJX9	PAG15_BOVINPhospholipase A2 group XV OS=Bos taurus OX=9913 GN=PLA2G15 PE=1 SV=1	C	GO:0005654	nucleoplasm
L8IJX9	PAG15_BOVINPhospholipase A2 group XV OS=Bos taurus OX=9913 GN=PLA2G15 PE=1 SV=1	C	GO:0005764	lysosome
L8IJX9	PAG15_BOVINPhospholipase A2 group XV OS=Bos taurus OX=9913 GN=PLA2G15 PE=1 SV=1	C	GO:0016020	membrane
L8IJX9	PAG15_BOVINPhospholipase A2 group XV OS=Bos taurus OX=9913 GN=PLA2G15 PE=1 SV=1	C	GO:0034364	high-density lipoprotein particle
L8IJX9	PAG15_BOVINPhospholipase A2 group XV OS=Bos taurus OX=9913 GN=PLA2G15 PE=1 SV=1	F	GO:0004607	phosphatidylcholine-sterol O-acyltransferase activity
L8IJX9	PAG15_BOVINPhospholipase A2 group XV OS=Bos taurus OX=9913 GN=PLA2G15 PE=1 SV=1	F	GO:0004622	lysophospholipase activity
L8IJX9	PAG15_BOVINPhospholipase A2 group XV OS=Bos taurus OX=9913 GN=PLA2G15 PE=1 SV=1	F	GO:0005543	phospholipid binding
L8IJX9	PAG15_BOVINPhospholipase A2 group XV OS=Bos taurus OX=9913 GN=PLA2G15 PE=1 SV=1	F	GO:0034186	apolipoprotein A-I binding
L8IJX9	PAG15_BOVINPhospholipase A2 group XV OS=Bos taurus OX=9913 GN=PLA2G15 PE=1 SV=1	F	GO:0047499	calcium-independent phospholipase A2 activity
L8IJX9	PAG15_BOVINPhospholipase A2 group XV OS=Bos taurus OX=9913 GN=PLA2G15 PE=1 SV=1	P	GO:0006656	phosphatidylcholine biosynthetic process
L8IJX9	PAG15_BOVINPhospholipase A2 group XV OS=Bos taurus OX=9913 GN=PLA2G15 PE=1 SV=1	P	GO:0006672	ceramide metabolic process
L8IJX9	PAG15_BOVINPhospholipase A2 group XV OS=Bos taurus OX=9913 GN=PLA2G15 PE=1 SV=1	P	GO:0008203	cholesterol metabolic process
L8IJX9	PAG15_BOVINPhospholipase A2 group XV OS=Bos taurus OX=9913 GN=PLA2G15 PE=1 SV=1	P	GO:0009062	fatty acid catabolic process
L8IJX9	PAG15_BOVINPhospholipase A2 group XV OS=Bos taurus OX=9913 GN=PLA2G15 PE=1 SV=1	P	GO:0030301	cholesterol transport
L8IJX9	PAG15_BOVINPhospholipase A2 group XV OS=Bos taurus OX=9913 GN=PLA2G15 PE=1 SV=1	P	GO:0034372	very-low-density lipoprotein particle remodeling
L8IJX9	PAG15_BOVINPhospholipase A2 group XV OS=Bos taurus OX=9913 GN=PLA2G15 PE=1 SV=1	P	GO:0034375	high-density lipoprotein particle remodeling
L8IJX9	PAG15_BOVINPhospholipase A2 group XV OS=Bos taurus OX=9913 GN=PLA2G15 PE=1 SV=1	P	GO:0034638	phosphatidylcholine catabolic process
L8IJX9	PAG15_BOVINPhospholipase A2 group XV OS=Bos taurus OX=9913 GN=PLA2G15 PE=1 SV=1	P	GO:0042158	lipoprotein biosynthetic process
L8IJX9	PAG15_BOVINPhospholipase A2 group XV OS=Bos taurus OX=9913 GN=PLA2G15 PE=1 SV=1	P	GO:0042632	cholesterol homeostasis
L8IJX9	PAG15_BOVINPhospholipase A2 group XV OS=Bos taurus OX=9913 GN=PLA2G15 PE=1 SV=1	P	GO:0046338	phosphatidylethanolamine catabolic process
L8IJX9	PAG15_BOVINPhospholipase A2 group XV OS=Bos taurus OX=9913 GN=PLA2G15 PE=1 SV=1	P	GO:0046688	response to copper ion
L8IJX9	PAG15_BOVINPhospholipase A2 group XV OS=Bos taurus OX=9913 GN=PLA2G15 PE=1 SV=1	P	GO:0051384	response to glucocorticoid
L8IJX9	PAG15_BOVINPhospholipase A2 group XV OS=Bos taurus OX=9913 GN=PLA2G15 PE=1 SV=1	P	GO:0090107	regulation of high-density lipoprotein particle assembly
L8IJX9	PAG15_BOVINPhospholipase A2 group XV OS=Bos taurus OX=9913 GN=PLA2G15 PE=1 SV=1	P	GO:0042967	obsolete acyl-carrier-protein biosynthetic process
L8IXR3	ZBT38_HUMANZinc finger and BTB domain-containing 38 OS=Homo sapiens OX=9606 GN=ZBTB38 PE=1 SV=2	C	GO:0005829	cytosol
L8IXR3	ZBT38_HUMANZinc finger and BTB domain-containing 38 OS=Homo sapiens OX=9606 GN=ZBTB38 PE=1 SV=2	C	GO:0016604	nuclear body
L8IXR3	ZBT38_HUMANZinc finger and BTB domain-containing 38 OS=Homo sapiens OX=9606 GN=ZBTB38 PE=1 SV=2	F	GO:0000978	RNA polymerase II proximal promoter sequence-specific DNA binding
L8IXR3	ZBT38_HUMANZinc finger and BTB domain-containing 38 OS=Homo sapiens OX=9606 GN=ZBTB38 PE=1 SV=2	F	GO:0001227	DNA-binding transcription repressor activity, RNA polymerase II-specific
L8IXR3	ZBT38_HUMANZinc finger and BTB domain-containing 38 OS=Homo sapiens OX=9606 GN=ZBTB38 PE=1 SV=2	F	GO:0003682	chromatin binding
L8IXR3	ZBT38_HUMANZinc finger and BTB domain-containing 38 OS=Homo sapiens OX=9606 GN=ZBTB38 PE=1 SV=2	F	GO:0008327	methyl-CpG binding
L8IXR3	ZBT38_HUMANZinc finger and BTB domain-containing 38 OS=Homo sapiens OX=9606 GN=ZBTB38 PE=1 SV=2	F	GO:0010428	methyl-CpNpG binding
L8IXR3	ZBT38_HUMANZinc finger and BTB domain-containing 38 OS=Homo sapiens OX=9606 GN=ZBTB38 PE=1 SV=2	F	GO:0019901	protein kinase binding
L8IXR3	ZBT38_HUMANZinc finger and BTB domain-containing 38 OS=Homo sapiens OX=9606 GN=ZBTB38 PE=1 SV=2	F	GO:0042803	protein homodimerization activity
L8IXR3	ZBT38_HUMANZinc finger and BTB domain-containing 38 OS=Homo sapiens OX=9606 GN=ZBTB38 PE=1 SV=2	F	GO:0042826	histone deacetylase binding
L8IXR3	ZBT38_HUMANZinc finger and BTB domain-containing 38 OS=Homo sapiens OX=9606 GN=ZBTB38 PE=1 SV=2	F	GO:0046872	metal ion binding
L8IXR3	ZBT38_HUMANZinc finger and BTB domain-containing 38 OS=Homo sapiens OX=9606 GN=ZBTB38 PE=1 SV=2	P	GO:0000122	negative regulation of transcription by RNA polymerase II
L8IXR3	ZBT38_HUMANZinc finger and BTB domain-containing 38 OS=Homo sapiens OX=9606 GN=ZBTB38 PE=1 SV=2	P	GO:0006275	regulation of DNA replication
L8IXR3	ZBT38_HUMANZinc finger and BTB domain-containing 38 OS=Homo sapiens OX=9606 GN=ZBTB38 PE=1 SV=2	P	GO:0006974	cellular response to DNA damage stimulus
L8IXR3	ZBT38_HUMANZinc finger and BTB domain-containing 38 OS=Homo sapiens OX=9606 GN=ZBTB38 PE=1 SV=2	P	GO:0043433	negative regulation of DNA-binding transcription factor activity
L8IXR3	ZBT38_HUMANZinc finger and BTB domain-containing 38 OS=Homo sapiens OX=9606 GN=ZBTB38 PE=1 SV=2	P	GO:0045944	positive regulation of transcription by RNA polymerase II
L8IXR3	ZBT38_HUMANZinc finger and BTB domain-containing 38 OS=Homo sapiens OX=9606 GN=ZBTB38 PE=1 SV=2	C	GO:0000785	chromatin
L8IXR3	ZBT38_HUMANZinc finger and BTB domain-containing 38 OS=Homo sapiens OX=9606 GN=ZBTB38 PE=1 SV=2	C	GO:0000118	histone deacetylase complex
L8HMZ8	IFI27_HUMANInterferon alpha-inducible mitochondrial OS=Homo sapiens OX=9606 GN=IFI27 PE=1 SV=4	C	GO:0005637	nuclear inner membrane
L8HMZ8	IFI27_HUMANInterferon alpha-inducible mitochondrial OS=Homo sapiens OX=9606 GN=IFI27 PE=1 SV=4	C	GO:0005741	mitochondrial outer membrane
L8HMZ8	IFI27_HUMANInterferon alpha-inducible mitochondrial OS=Homo sapiens OX=9606 GN=IFI27 PE=1 SV=4	C	GO:0005743	mitochondrial inner membrane
L8HMZ8	IFI27_HUMANInterferon alpha-inducible mitochondrial OS=Homo sapiens OX=9606 GN=IFI27 PE=1 SV=4	C	GO:0005783	endoplasmic reticulum
L8HMZ8	IFI27_HUMANInterferon alpha-inducible mitochondrial OS=Homo sapiens OX=9606 GN=IFI27 PE=1 SV=4	C	GO:0005886	plasma membrane
L8HMZ8	IFI27_HUMANInterferon alpha-inducible mitochondrial OS=Homo sapiens OX=9606 GN=IFI27 PE=1 SV=4	C	GO:0016021	integral component of membrane
L8HMZ8	IFI27_HUMANInterferon alpha-inducible mitochondrial OS=Homo sapiens OX=9606 GN=IFI27 PE=1 SV=4	F	GO:0001102	RNA polymerase II activating transcription factor binding
L8HMZ8	IFI27_HUMANInterferon alpha-inducible mitochondrial OS=Homo sapiens OX=9606 GN=IFI27 PE=1 SV=4	F	GO:0005521	lamin binding
L8HMZ8	IFI27_HUMANInterferon alpha-inducible mitochondrial OS=Homo sapiens OX=9606 GN=IFI27 PE=1 SV=4	F	GO:0042802	identical protein binding
L8HMZ8	IFI27_HUMANInterferon alpha-inducible mitochondrial OS=Homo sapiens OX=9606 GN=IFI27 PE=1 SV=4	P	GO:0000122	negative regulation of transcription by RNA polymerase II
L8HMZ8	IFI27_HUMANInterferon alpha-inducible mitochondrial OS=Homo sapiens OX=9606 GN=IFI27 PE=1 SV=4	P	GO:0001836	release of cytochrome c from mitochondria
L8HMZ8	IFI27_HUMANInterferon alpha-inducible mitochondrial OS=Homo sapiens OX=9606 GN=IFI27 PE=1 SV=4	P	GO:0007568	aging
L8HMZ8	IFI27_HUMANInterferon alpha-inducible mitochondrial OS=Homo sapiens OX=9606 GN=IFI27 PE=1 SV=4	P	GO:0042058	regulation of epidermal growth factor receptor signaling pathway
L8HMZ8	IFI27_HUMANInterferon alpha-inducible mitochondrial OS=Homo sapiens OX=9606 GN=IFI27 PE=1 SV=4	P	GO:0043154	negative regulation of cysteine-type endopeptidase activity involved in apoptotic process
L8HMZ8	IFI27_HUMANInterferon alpha-inducible mitochondrial OS=Homo sapiens OX=9606 GN=IFI27 PE=1 SV=4	P	GO:0043161	proteasome-mediated ubiquitin-dependent protein catabolic process
L8HMZ8	IFI27_HUMANInterferon alpha-inducible mitochondrial OS=Homo sapiens OX=9606 GN=IFI27 PE=1 SV=4	P	GO:0044827	modulation by host of viral genome replication
L8HMZ8	IFI27_HUMANInterferon alpha-inducible mitochondrial OS=Homo sapiens OX=9606 GN=IFI27 PE=1 SV=4	P	GO:0046825	regulation of protein export from nucleus
L8HMZ8	IFI27_HUMANInterferon alpha-inducible mitochondrial OS=Homo sapiens OX=9606 GN=IFI27 PE=1 SV=4	P	GO:0051607	defense response to virus
L8HMZ8	IFI27_HUMANInterferon alpha-inducible mitochondrial OS=Homo sapiens OX=9606 GN=IFI27 PE=1 SV=4	P	GO:0051902	negative regulation of mitochondrial depolarization
L8HMZ8	IFI27_HUMANInterferon alpha-inducible mitochondrial OS=Homo sapiens OX=9606 GN=IFI27 PE=1 SV=4	P	GO:0060337	type I interferon signaling pathway
L8HMZ8	IFI27_HUMANInterferon alpha-inducible mitochondrial OS=Homo sapiens OX=9606 GN=IFI27 PE=1 SV=4	P	GO:0070936	protein K48-linked ubiquitination
L8HMZ8	IFI27_HUMANInterferon alpha-inducible mitochondrial OS=Homo sapiens OX=9606 GN=IFI27 PE=1 SV=4	P	GO:0072593	reactive oxygen species metabolic process
L8HMZ8	IFI27_HUMANInterferon alpha-inducible mitochondrial OS=Homo sapiens OX=9606 GN=IFI27 PE=1 SV=4	P	GO:0097193	intrinsic apoptotic signaling pathway
L8HMZ8	IFI27_HUMANInterferon alpha-inducible mitochondrial OS=Homo sapiens OX=9606 GN=IFI27 PE=1 SV=4	P	GO:0098586	cellular response to virus
L8HMZ8	IFI27_HUMANInterferon alpha-inducible mitochondrial OS=Homo sapiens OX=9606 GN=IFI27 PE=1 SV=4	P	GO:2001240	negative regulation of extrinsic apoptotic signaling pathway in absence of ligand
L8IGB4	RBMS1_HUMANRNA-binding single-stranded-interacting 1 OS=Homo sapiens OX=9606 GN=RBMS1 PE=1 SV=3	C	GO:0005634	nucleus
L8IGB4	RBMS1_HUMANRNA-binding single-stranded-interacting 1 OS=Homo sapiens OX=9606 GN=RBMS1 PE=1 SV=3	C	GO:0005829	cytosol
L8IGB4	RBMS1_HUMANRNA-binding single-stranded-interacting 1 OS=Homo sapiens OX=9606 GN=RBMS1 PE=1 SV=3	C	GO:1990904	ribonucleoprotein complex
L8IGB4	RBMS1_HUMANRNA-binding single-stranded-interacting 1 OS=Homo sapiens OX=9606 GN=RBMS1 PE=1 SV=3	F	GO:0003697	single-stranded DNA binding
L8IGB4	RBMS1_HUMANRNA-binding single-stranded-interacting 1 OS=Homo sapiens OX=9606 GN=RBMS1 PE=1 SV=3	F	GO:0008143	poly(A) binding
L8IGB4	RBMS1_HUMANRNA-binding single-stranded-interacting 1 OS=Homo sapiens OX=9606 GN=RBMS1 PE=1 SV=3	F	GO:0008266	poly(U) RNA binding
L8IGB4	RBMS1_HUMANRNA-binding single-stranded-interacting 1 OS=Homo sapiens OX=9606 GN=RBMS1 PE=1 SV=3	F	GO:0035925	mRNA 3'-UTR AU-rich region binding
L8IGB4	RBMS1_HUMANRNA-binding single-stranded-interacting 1 OS=Homo sapiens OX=9606 GN=RBMS1 PE=1 SV=3	P	GO:0002357	defense response to tumor cell
L8IGB4	RBMS1_HUMANRNA-binding single-stranded-interacting 1 OS=Homo sapiens OX=9606 GN=RBMS1 PE=1 SV=3	P	GO:0006260	DNA replication
L8IGB4	RBMS1_HUMANRNA-binding single-stranded-interacting 1 OS=Homo sapiens OX=9606 GN=RBMS1 PE=1 SV=3	P	GO:0010629	negative regulation of gene expression
L8IGB4	RBMS1_HUMANRNA-binding single-stranded-interacting 1 OS=Homo sapiens OX=9606 GN=RBMS1 PE=1 SV=3	P	GO:0045727	positive regulation of translation
L8IGB4	RBMS1_HUMANRNA-binding single-stranded-interacting 1 OS=Homo sapiens OX=9606 GN=RBMS1 PE=1 SV=3	P	GO:0090090	negative regulation of canonical Wnt signaling pathway
L8I6G2	IBP6_BOVINInsulin-like growth factor-binding 6 OS=Bos taurus OX=9913 GN=IGFBP6 PE=2 SV=2	C	GO:0005794	Golgi apparatus
L8I6G2	IBP6_BOVINInsulin-like growth factor-binding 6 OS=Bos taurus OX=9913 GN=IGFBP6 PE=2 SV=2	C	GO:0042568	insulin-like growth factor binary complex
L8I6G2	IBP6_BOVINInsulin-like growth factor-binding 6 OS=Bos taurus OX=9913 GN=IGFBP6 PE=2 SV=2	F	GO:0001968	fibronectin binding
L8I6G2	IBP6_BOVINInsulin-like growth factor-binding 6 OS=Bos taurus OX=9913 GN=IGFBP6 PE=2 SV=2	F	GO:0005102	signaling receptor binding
L8I6G2	IBP6_BOVINInsulin-like growth factor-binding 6 OS=Bos taurus OX=9913 GN=IGFBP6 PE=2 SV=2	F	GO:0005201	extracellular matrix structural constituent
L8I6G2	IBP6_BOVINInsulin-like growth factor-binding 6 OS=Bos taurus OX=9913 GN=IGFBP6 PE=2 SV=2	F	GO:0031994	insulin-like growth factor I binding
L8I6G2	IBP6_BOVINInsulin-like growth factor-binding 6 OS=Bos taurus OX=9913 GN=IGFBP6 PE=2 SV=2	F	GO:0031995	insulin-like growth factor II binding
L8I6G2	IBP6_BOVINInsulin-like growth factor-binding 6 OS=Bos taurus OX=9913 GN=IGFBP6 PE=2 SV=2	P	GO:0001558	regulation of cell growth
L8I6G2	IBP6_BOVINInsulin-like growth factor-binding 6 OS=Bos taurus OX=9913 GN=IGFBP6 PE=2 SV=2	P	GO:0008285	negative regulation of cell population proliferation
L8I6G2	IBP6_BOVINInsulin-like growth factor-binding 6 OS=Bos taurus OX=9913 GN=IGFBP6 PE=2 SV=2	P	GO:0009725	response to hormone
L8I6G2	IBP6_BOVINInsulin-like growth factor-binding 6 OS=Bos taurus OX=9913 GN=IGFBP6 PE=2 SV=2	P	GO:0009967	positive regulation of signal transduction
L8I6G2	IBP6_BOVINInsulin-like growth factor-binding 6 OS=Bos taurus OX=9913 GN=IGFBP6 PE=2 SV=2	P	GO:0010243	response to organonitrogen compound
L8I6G2	IBP6_BOVINInsulin-like growth factor-binding 6 OS=Bos taurus OX=9913 GN=IGFBP6 PE=2 SV=2	P	GO:0019220	regulation of phosphate metabolic process
L8I6G2	IBP6_BOVINInsulin-like growth factor-binding 6 OS=Bos taurus OX=9913 GN=IGFBP6 PE=2 SV=2	P	GO:0030334	regulation of cell migration
L8I6G2	IBP6_BOVINInsulin-like growth factor-binding 6 OS=Bos taurus OX=9913 GN=IGFBP6 PE=2 SV=2	P	GO:0031399	regulation of protein modification process
L8I6G2	IBP6_BOVINInsulin-like growth factor-binding 6 OS=Bos taurus OX=9913 GN=IGFBP6 PE=2 SV=2	P	GO:0043065	positive regulation of apoptotic process
L8I6G2	IBP6_BOVINInsulin-like growth factor-binding 6 OS=Bos taurus OX=9913 GN=IGFBP6 PE=2 SV=2	P	GO:0043567	regulation of insulin-like growth factor receptor signaling pathway
L8I6G2	IBP6_BOVINInsulin-like growth factor-binding 6 OS=Bos taurus OX=9913 GN=IGFBP6 PE=2 SV=2	P	GO:0048513	animal organ development
L8I6G2	IBP6_BOVINInsulin-like growth factor-binding 6 OS=Bos taurus OX=9913 GN=IGFBP6 PE=2 SV=2	P	GO:0050793	regulation of developmental process
L8I6G2	IBP6_BOVINInsulin-like growth factor-binding 6 OS=Bos taurus OX=9913 GN=IGFBP6 PE=2 SV=2	P	GO:0071407	cellular response to organic cyclic compound
L8I6G2	IBP6_BOVINInsulin-like growth factor-binding 6 OS=Bos taurus OX=9913 GN=IGFBP6 PE=2 SV=2	P	GO:0090090	negative regulation of canonical Wnt signaling pathway
L8I6G2	IBP6_BOVINInsulin-like growth factor-binding 6 OS=Bos taurus OX=9913 GN=IGFBP6 PE=2 SV=2	P	GO:1901700	response to oxygen-containing compound
L8I6G2	IBP6_BOVINInsulin-like growth factor-binding 6 OS=Bos taurus OX=9913 GN=IGFBP6 PE=2 SV=2	C	GO:0005578	extracellular matrix
L8HXR1	CAV3_BOVINCaveolin-3 OS=Bos taurus OX=9913 GN=CAV3 PE=2 SV=1	C	GO:0000139	Golgi membrane
L8HXR1	CAV3_BOVINCaveolin-3 OS=Bos taurus OX=9913 GN=CAV3 PE=2 SV=1	C	GO:0002080	acrosomal membrane
L8HXR1	CAV3_BOVINCaveolin-3 OS=Bos taurus OX=9913 GN=CAV3 PE=2 SV=1	C	GO:0002095	caveolar macromolecular signaling complex
L8HXR1	CAV3_BOVINCaveolin-3 OS=Bos taurus OX=9913 GN=CAV3 PE=2 SV=1	C	GO:0005768	endosome
L8HXR1	CAV3_BOVINCaveolin-3 OS=Bos taurus OX=9913 GN=CAV3 PE=2 SV=1	C	GO:0005783	endoplasmic reticulum
L8HXR1	CAV3_BOVINCaveolin-3 OS=Bos taurus OX=9913 GN=CAV3 PE=2 SV=1	C	GO:0005887	integral component of plasma membrane
L8HXR1	CAV3_BOVINCaveolin-3 OS=Bos taurus OX=9913 GN=CAV3 PE=2 SV=1	C	GO:0005925	focal adhesion
L8HXR1	CAV3_BOVINCaveolin-3 OS=Bos taurus OX=9913 GN=CAV3 PE=2 SV=1	C	GO:0005929	cilium
L8HXR1	CAV3_BOVINCaveolin-3 OS=Bos taurus OX=9913 GN=CAV3 PE=2 SV=1	C	GO:0005938	cell cortex
L8HXR1	CAV3_BOVINCaveolin-3 OS=Bos taurus OX=9913 GN=CAV3 PE=2 SV=1	C	GO:0009986	cell surface
L8HXR1	CAV3_BOVINCaveolin-3 OS=Bos taurus OX=9913 GN=CAV3 PE=2 SV=1	C	GO:0014704	intercalated disc
L8HXR1	CAV3_BOVINCaveolin-3 OS=Bos taurus OX=9913 GN=CAV3 PE=2 SV=1	C	GO:0016010	dystrophin-associated glycoprotein complex
L8HXR1	CAV3_BOVINCaveolin-3 OS=Bos taurus OX=9913 GN=CAV3 PE=2 SV=1	C	GO:0030018	Z disc
L8HXR1	CAV3_BOVINCaveolin-3 OS=Bos taurus OX=9913 GN=CAV3 PE=2 SV=1	C	GO:0030315	T-tubule
L8HXR1	CAV3_BOVINCaveolin-3 OS=Bos taurus OX=9913 GN=CAV3 PE=2 SV=1	C	GO:0031594	neuromuscular junction
L8HXR1	CAV3_BOVINCaveolin-3 OS=Bos taurus OX=9913 GN=CAV3 PE=2 SV=1	C	GO:0048471	perinuclear region of cytoplasm
L8HXR1	CAV3_BOVINCaveolin-3 OS=Bos taurus OX=9913 GN=CAV3 PE=2 SV=1	F	GO:0005102	signaling receptor binding
L8HXR1	CAV3_BOVINCaveolin-3 OS=Bos taurus OX=9913 GN=CAV3 PE=2 SV=1	F	GO:0005246	calcium channel regulator activity
L8HXR1	CAV3_BOVINCaveolin-3 OS=Bos taurus OX=9913 GN=CAV3 PE=2 SV=1	F	GO:0008022	protein C-terminus binding
[truncated: 5,945 more rows]

## Sheet: BP
Level	GO ID	GO-Term	GO Type	#Seqs	Sequence Names
1	GO:0008150	biological_process	P	270	L8HXL7,L8J274,L8J052,L8HXK3,L8IB26,L8IFV7,L8I958,L8I8M2,L8IKT6,L8IJN1,L8J351,L8IJW9,L8IBF2,L8IB09,L8HN27,L8I7Z4,L8IIF1,L8J2M2,L8HNU2,L8IJG9,L8IIM8,L8IX54,L8IP29,L8IEH4,L8IFJ0,L8IB79,L8IJ35,L8HPM7,L8HV64,L8I491,L8IK42,L8I6Z9,L8IHJ7,L8IAC6,L8IK78,L8I9E0,L8HRK0,L8IGB4,L8ITU9,L8IHQ3,L8IH11,L8HSM4,L8IV54,L8I0B0,L8I2U1,L8HW02,L8IAA7,L8I7Q8,L8HYH0,L8I177,L8IGC3,L8I4L3,L8IWR9,L8IKX5,L8J188,L8I3Z2,L8I3S5,…
2	GO:0050896	response to stimulus	P	160	L8IQQ6,L8IX25,L8IHA9,L8HSX9,L8J274,L8J052,L8HXK3,L8IIM5,L8IFV7,L8I958,L8I6V6,L8I8M2,L8J595,L8IT90,L8HK61,L8IJN1,L8IUY7,L8IBF2,L8IB09,L8IQ44,L8J224,L8IMB9,L8J0P6,L8IUT9,L8IGX7,L8IJG9,L8IIM8,L8IX54,L8IP29,L8IFJ0,L8IB79,L8HQ26,L8HPM7,L8HV64,L8IM29,L8IK42,L8J0U4,L8IYJ5,L8HW49,L8I491,L8ICD7,L8J197,L8I6G2,L8IHJ7,L8IK78,L8IR50,L8I9E0,L8HZ66,L8J2E7,L8IXI6,L8IGB4,L8ICN2,L8II96,L8IKN2,L8HND5,L8IH11,L8IXR3,…
2	GO:0015976	carbon utilization	P	4	L8J0U4,L8HXP8,L8HZ66,L8IZX3
2	GO:0007610	behavior	P	23	L8I870,L8IM79,L8J224,L8I798,L8IX69,L8IBA7,L8J1K1,L8IUT9,L8I463,L8IGK5,L8I4L3,L8I7A3,L8I9E0,L8I9A3,L8IDK7,L8I0I4,L8IZ21,L8IGV0,L8HX06,L8II73,L8IV54,L8HX98,L8IFL3
2	GO:0051179	localization	P	149	L8IQQ6,L8IX25,L8IT79,L8IH78,L8J0I1,L8IHA9,L8IY30,L8HX22,L8J052,L8HXK3,L8IB26,L8IIM5,L8I6V6,L8I7C0,L8IT90,L8IJN1,L8IG34,L8I7Z4,L8HVY9,L8J1H5,L8J0P6,L8IIF1,L8IUT9,L8IGX7,L8HNU2,L8I9A3,L8IIM8,L8IX54,L8IEH4,L8I9K6,L8IJ35,L8IB79,L8HPM7,L8HQ26,L8IBZ3,L8I491,L8IK42,L8J0U4,L8IYJ5,L8ICD7,L8J197,L8HXM6,L8IHJ7,L8IAC6,L8IK78,L8I9E0,L8J5Y3,L8IWJ4,L8IXI6,L8ITU9,L8IHQ3,L8IKN2,L8J1T9,L8HND5,L8IH11,L8HQR6,L8I0B0,…
2	GO:0051704	multi-organism process	P	53	L8IQQ6,L8HWY2,L8HXR1,L8IHA9,L8I798,L8IMS7,L8J052,L8J1B9,L8HK61,L8HMZ8,L8IJN1,L8IUY7,L8I018,L8IGL8,L8IF42,L8IM79,L8IMB9,L8J0P6,L8IUY4,L8I7A3,L8HNI0,L8IIM8,L8HWB6,L8IGD5,L8HLW7,L8HZ02,L8IFJ0,L8HQ26,L8HPM7,L8I491,L8I3L2,L8IBA7,L8IHJ7,L8IK78,L8I9E0,L8IXI6,L8HSM4,L8I793,L8IHP9,L8I0B0,L8IPA4,L8I177,L8J1K1,L8IGC3,L8I4L3,L8J5K4,L8IDK5,L8I3S5,L8HTX7,L8HX06,L8IVX7,L8IY25,L8HQI2
2	GO:0008283	cell population proliferation	P	20	L8IU68,L8IYJ5,L8I3L2,L8I798,L8IAA7,L8IUT9,L8IMS7,L8J274,L8IKX5,L8IWR9,L8HNI0,L8IK78,L8HXK3,L8HND5,L8IWP2,L8IM29,L8HVI0,L8IJW9,L8IHP9,L8I7V5
2	GO:0043473	pigmentation	P	4	L8J1K1,L8J026,L8J0I1,L8IQ44
2	GO:0040007	growth	P	27	L8IMS7,L8IVA1,L8IK78,L8J5Y3,L8J1B9,L8J595,L8IED3,L8IIL2,L8ICN2,L8IRV6,L8J3Q3,L8I793,L8HVI0,L8IGL8,L8IHP9,L8IFL3,L8IM79,L8HYH0,L8IIF1,L8IUT9,L8I4L3,L8IWR9,L8HX06,L8IWP2,L8IAM6,L8INI7,L8I7V5
2	GO:0009987	cellular process	P	252	L8HXL7,L8J274,L8J052,L8HXK3,L8IFV7,L8I958,L8I8M2,L8IKT6,L8IJN1,L8J351,L8IJW9,L8IBF2,L8IB09,L8HN27,L8IIF1,L8J2M2,L8HNU2,L8IJG9,L8IIM8,L8IX54,L8IEH4,L8IFJ0,L8IB79,L8HPM7,L8HV64,L8IK42,L8I491,L8I6Z9,L8IHJ7,L8IAC6,L8IK78,L8I9E0,L8HRK0,L8IGB4,L8ITU9,L8IHQ3,L8IH11,L8HSM4,L8IV54,L8I0B0,L8I2U1,L8HW02,L8IAA7,L8I7Q8,L8HYH0,L8I177,L8IGC3,L8I4L3,L8IWR9,L8IKX5,L8J188,L8I3Z2,L8I3S5,L8I3R4,L8J0L1,L8HUH1,L8IQM1,…
2	GO:0002376	immune system process	P	83	L8IQQ6,L8I2E4,L8IX25,L8HWY2,L8IHA9,L8J0I1,L8I798,L8HXR1,L8IMS7,L8J052,L8HXK3,L8HRD1,L8IFV7,L8I958,L8I6V6,L8I8M2,L8IKT6,L8I284,L8HMZ8,L8J1B1,L8J3Q3,L8I018,L8IJW9,L8IBF2,L8IB09,L8IF42,L8IGL8,L8IU68,L8IM79,L8IMB9,L8J0P6,L8IIF1,L8IDE2,L8IUT9,L8IUY4,L8IGX7,L8HNI0,L8IIM8,L8HWB6,L8HRM3,L8I5C0,L8IEH4,L8IFJ0,L8HZ02,L8IB79,L8HPM7,L8I8E6,L8IWP2,L8INI7,L8IS69,L8J0U4,L8HP51,L8J197,L8IBA7,L8IVA1,L8IAC6,L8IK78,…
2	GO:0065007	biological regulation	P	242	L8HXL7,L8J274,L8J052,L8HXK3,L8IFV7,L8I958,L8I8M2,L8IKT6,L8IJN1,L8J351,L8IJW9,L8IBF2,L8IB09,L8HN27,L8IIF1,L8J2M2,L8HNU2,L8IIM8,L8IX54,L8IP29,L8IEH4,L8IFJ0,L8IB79,L8HPM7,L8HV64,L8IK42,L8I491,L8I6Z9,L8IHJ7,L8IAC6,L8IK78,L8I9E0,L8HRK0,L8IGB4,L8ITU9,L8IHQ3,L8IH11,L8HSM4,L8IV54,L8I0B0,L8I2U1,L8HW02,L8IAA7,L8I7Q8,L8HYH0,L8I177,L8IGC3,L8I4L3,L8IWR9,L8IKX5,L8J188,L8I3Z2,L8I3S5,L8I3R4,L8J0L1,L8HUH1,L8IU59,…
2	GO:0032501	multicellular organismal process	P	92	L8I6J8,L8HMB1,L8IFC2,L8HXR1,L8J0I1,L8IHA9,L8I798,L8IX69,L8HSX9,L8I463,L8IGK5,L8HX22,L8I1N5,L8HXK3,L8IIM5,L8IED3,L8IKT6,L8IJX9,L8IJN1,L8IUY7,L8IRV6,L8J3Q3,L8I018,L8IF42,L8IQ44,L8I7Z4,L8IM79,L8J224,L8IUT9,L8I7A3,L8J2M2,L8I5C0,L8ISB9,L8IWP2,L8I8E6,L8IKX6,L8INI7,L8IM29,L8J0U4,L8I491,L8HX98,L8I870,L8I3L2,L8IN10,L8HW13,L8ICD7,L8IBA7,L8IVA1,L8IK78,L8I9E0,L8IXI6,L8IJ79,L8J1X3,L8IIL2,L8II96,L8IHQ3,L8IKN2,…
2	GO:0008152	metabolic process	P	169	L8HXL7,L8J274,L8J052,L8HXK3,L8IFV7,L8I958,L8IKT6,L8IJN1,L8IBF2,L8J2M2,L8IJG9,L8IX54,L8IP29,L8IFJ0,L8IB79,L8HV64,L8IK42,L8IHJ7,L8IAC6,L8IK78,L8I9E0,L8HRK0,L8IGB4,L8ITU9,L8IHQ3,L8IH11,L8I0B0,L8HW02,L8IAA7,L8HYH0,L8I177,L8IGC3,L8I4L3,L8IKX5,L8IWR9,L8J188,L8I3Z2,L8I3S5,L8I3R4,L8IU59,L8HQI2,L8I7V5,L8IFC2,L8HWY2,L8HXR1,L8IMS7,L8IGK5,L8I1N5,L8IKD7,L8HMZ8,L8I018,L8IF42,L8IGL8,L8IDJ1,L8IUY4,L8IAH1,L8I7A3,…
2	GO:0071840	cellular component organization or biogenesis	P	127	L8HRF0,L8IHA9,L8HX22,L8HXK3,L8IG16,L8IIM5,L8IJS0,L8J595,L8I6V6,L8I958,L8IKT6,L8IJN1,L8IJW9,L8J1H5,L8IMB9,L8J224,L8IUT9,L8IGX7,L8HNU2,L8IJG9,L8IIM8,L8IX54,L8HL45,L8IB79,L8HQ26,L8HV64,L8IBZ3,L8IM29,L8INB2,L8J0U4,L8IK78,L8I9E0,L8IR50,L8J5Y3,L8J2E7,L8IXI6,L8HRK0,L8I944,L8ITU9,L8IHQ3,L8IKN2,L8HND5,L8IH11,L8HSM4,L8I0B0,L8IQ63,L8HW02,L8IPA4,L8IAA7,L8I7Q8,L8HYH0,L8HZL7,L8I177,L8HW79,L8IGC3,L8I4L3,L8IKX5,…
2	GO:0032502	developmental process	P	150	L8HMB1,L8IQQ6,L8IX25,L8J0I1,L8IY30,L8HSX9,L8HX22,L8HXK3,L8IG16,L8IIM5,L8IFV7,L8J595,L8I958,L8I8M2,L8IT90,L8IJN1,L8IUY7,L8IUU5,L8IB09,L8IQ44,L8I7Z4,L8J1H5,L8J224,L8IIF1,L8IUT9,L8J2M2,L8HNU2,L8I9A3,L8I9K6,L8HL45,L8HQ26,L8IM29,L8J0U4,L8I491,L8IYJ5,L8HW49,L8INB2,L8ICD7,L8J197,L8HXM6,L8I6Z9,L8I6G2,L8IHJ7,L8IK78,L8I9E0,L8J5Y3,L8HZ66,L8IWJ4,L8J2E7,L8IXI6,L8II96,L8IKN2,L8ITU9,L8ICN2,L8HND5,L8IH11,L8HSM4,…
2	GO:0022414	reproductive process	P	52	L8HXK3,L8IIM5,L8IJS0,L8IFV7,L8IT90,L8J3Q3,L8IGL8,L8HN27,L8IM79,L8IXW8,L8IIF1,L8IUT9,L8I7A3,L8J2M2,L8J4V3,L8IGD5,L8I9K6,L8IIG2,L8HQ26,L8IWP2,L8I8E6,L8IKX6,L8IM29,L8J0U4,L8I491,L8IYJ5,L8HP51,L8IBA7,L8IC85,L8IK78,L8HZ66,L8IXI6,L8J1X3,L8IBF6,L8IIL2,L8IKN2,L8HND5,L8HSM4,L8HVI0,L8IHP9,L8IFL3,L8I1W1,L8I177,L8I4L3,L8IWR9,L8IDK5,L8IZ21,L8HX06,L8IAM6,L8II73,L8HUH1,L8I7V5
2	GO:0048511	rhythmic process	P	15	L8I7V5,L8HW13,L8J1K1,L8IUT9,L8I1N5,L8IWR9,L8HXK3,L8IXI6,L8IZ21,L8IT90,L8HQ26,L8HX06,L8II73,L8HQI2,L8IFL3
2	GO:0040011	locomotion	P	37	L8IYJ5,L8I3L2,L8I2E4,L8IBA7,L8IVA1,L8HXK3,L8IG16,L8IK78,L8HZ66,L8IJS0,L8IXI6,L8IJ79,L8I958,L8HUD1,L8J1B1,L8HVI0,L8IJW9,L8IF42,L8IFL3,L8IM79,L8J224,L8IAA7,L8HPA3,L8HZL7,L8HPT2,L8IUT9,L8IIF1,L8I4L3,L8HWB6,L8IPF6,L8J0L1,L8IWP2,L8IAM6,L8IBZ3,L8INI7,L8IM29,L8I7V5
2	GO:0022610	biological adhesion	P	26	L8IYJ5,L8I3L2,L8I798,L8HXK3,L8IG16,L8J634,L8IXI6,L8IFV7,L8IJ79,L8HUD1,L8J1B1,L8HVI0,L8IJW9,L8IF42,L8HQR6,L8IGL8,L8IHP9,L8IIZ9,L8IM79,L8J224,L8HZL7,L8I109,L8IUT9,L8I4L3,L8IFJ0,L8HX06
2	GO:0110148	biomineralization	P	2	L8HQI2,L8HPA3
2	GO:0001906	cell killing	P	2	L8IMB9,L8IHP9
2	GO:0023052	signaling	P	15	L8IN10,L8HXR1,L8IUT9,L8J121,L8IMS7,L8IWR9,L8IG16,L8IDK7,L8IX54,L8IPF6,L8IKN2,L8J1B1,L8J3Q3,L8IHP9,L8IIZ9
2	GO:0098754	detoxification	P	4	L8J1K1,L8IPN7,L8I9E0,L8HT60
2	GO:0098743	cell aggregation	P	2	L8HVI0,L8IYJ5
3	GO:0007049	cell cycle	P	5	L8IE51,L8IH11,L8I463,L8HNU2,L8IJG9
3	GO:0065008	regulation of biological quality	P	134	L8IX25,L8IHA9,L8J0I1,L8HSX9,L8J274,L8HX22,L8HXK3,L8IIM5,L8J595,L8IT90,L8IKT6,L8IJN1,L8IUY7,L8IUU5,L8IBF2,L8IB09,L8HVY9,L8J224,L8IIF1,L8IUT9,L8J2M2,L8HNU2,L8I9A3,L8IP29,L8I9K6,L8HPM7,L8HV64,L8IBZ3,L8J0U4,L8HW49,L8I491,L8IYJ5,L8ICD7,L8ILP2,L8IAC6,L8IR50,L8I9E0,L8IK78,L8J2E7,L8IXI6,L8ITU9,L8IHQ3,L8IKN2,L8II96,L8HND5,L8IH11,L8HSM4,L8IJ81,L8IV54,L8HW02,L8IPA4,L8HZL7,L8I177,L8HW79,L8IGC3,L8I4L3,L8IKX5,…
3	GO:0014823	response to activity	P	5	L8II73,L8IAM6,L8HX06,L8HQI2,L8IFL3
3	GO:0007625	grooming behavior	P	1	L8I0I4
3	GO:0007566	embryo implantation	P	3	L8IIG2,L8IUT9,L8IAM6
3	GO:0055114	oxidation-reduction process	P	29	L8J0U4,L8IFC2,L8IZX3,L8HWY2,L8IAA7,L8IXW8,L8HPA3,L8IC85,L8HSH3,L8IGC3,L8HXP8,L8HZ66,L8J1B9,L8HRM3,L8J1X3,L8HWS9,L8IPN7,L8I7C0,L8HTX7,L8J0L8,L8I3R4,L8ICD6,L8IUY7,L8IUU5,L8IDW8,L8I8E6,L8HV64,L8IBZ3,L8HQI2
3	GO:0007568	aging	P	27	L8J0U4,L8IYJ5,L8IFC2,L8ICD7,L8IX25,L8HP51,L8IX69,L8IC85,L8IED3,L8IIL2,L8HMZ8,L8I9I2,L8IRV6,L8IDW8,L8HVI0,L8IM79,L8IAA7,L8IXW8,L8IUT9,L8J4V3,L8IZ21,L8IPN7,L8HX06,L8ICI6,L8INI7,L8IHZ4,L8I7V5
3	GO:0009791	post-embryonic development	P	4	L8ICD7,L8IVA1,L8IKN2,L8I793
3	GO:0045730	respiratory burst	P	1	L8I8E6
3	GO:0035264	multicellular organism growth	P	3	L8IK78,L8IM79,L8HYH0
3	GO:0043627	response to estrogen	P	9	L8J0U4,L8IED3,L8ICD6,L8HXR1,L8IX69,L8II73,L8IGC3,L8IM29,L8I7V5
3	GO:0042445	hormone metabolic process	P	11	L8J1X3,L8I3L2,L8IT90,L8J0I1,L8ILP2,L8IUU5,L8IDW8,L8II73,L8HX06,L8IU59,L8I7V5
3	GO:0007275	multicellular organism development	P	16	L8IFC2,L8IM79,L8J1K1,L8IK78,L8HXP8,L8HXK3,L8I3S5,L8IIL2,L8II96,L8HSA3,L8I9I2,L8IWP2,L8J3Q3,L8I793,L8IQM1,L8I7V5
3	GO:0007623	circadian rhythm	P	6	L8J1K1,L8IUT9,L8II73,L8HW13,L8I1N5,L8HQI2
3	GO:0006118	obsolete electron transport	P	22	L8J0U4,L8IFC2,L8IZX3,L8HWY2,L8IAA7,L8HPA3,L8IC85,L8IGC3,L8HXP8,L8J1B9,L8HRM3,L8HWS9,L8I7C0,L8ICD6,L8I3R4,L8HTX7,L8IUU5,L8IDW8,L8I8E6,L8HV64,L8IBZ3,L8HQI2
3	GO:0007165	signal transduction	P	108	L8IQQ6,L8J274,L8HX22,L8HXK3,L8IG16,L8IIM5,L8IFV7,L8J595,L8I6V6,L8I958,L8IKT6,L8IT90,L8IJN1,L8J351,L8IJW9,L8IBF2,L8IB09,L8IQ44,L8J224,L8IIF1,L8IUT9,L8IGX7,L8HNU2,L8IIM8,L8IX54,L8IEH4,L8IFJ0,L8I9K6,L8IB79,L8HPM7,L8HQ26,L8INB2,L8IYJ5,L8J197,L8I6Z9,L8IHJ7,L8IK78,L8I9E0,L8IXI6,L8IKN2,L8IHQ3,L8IH11,L8IV54,L8HQR6,L8I0B0,L8I2U1,L8HW02,L8HYH0,L8HZL7,L8HW79,L8IGC3,L8I4L3,L8IWR9,L8IPF6,L8I3R4,L8IGV0,L8IVX7,…
3	GO:0019725	cellular homeostasis	P	40	L8J0U4,L8IFC2,L8HXR1,L8IHA9,L8HWY2,L8IBA7,L8IC85,L8J274,L8HXK3,L8I9E0,L8HRD1,L8IIM5,L8IXI6,L8HZM0,L8J1B9,L8IDW8,L8I793,L8I018,L8IBF2,L8IU68,L8HVY9,L8HPA3,L8J1K1,L8IGC3,L8I4L3,L8IAH1,L8HWB6,L8I0I4,L8HYP7,L8IZ21,L8I3R4,L8I9K6,L8IGV0,L8HX06,L8IWP2,L8HV64,L8II73,L8IAM6,L8IY25,L8HUH1
3	GO:0002520	immune system development	P	1	L8I793
3	GO:0035265	organ growth	P	4	L8IUT9,L8J3Q3,L8I793,L8I7V5
3	GO:0042698	ovulation cycle	P	3	L8IXI6,L8IZ21,L8IFL3
3	GO:0051301	cell division	P	5	L8IE51,L8IK78,L8I463,L8ICI6,L8HNU2
3	GO:0007155	cell adhesion	P	26	L8IYJ5,L8I3L2,L8I798,L8HXK3,L8IG16,L8J634,L8IXI6,L8IFV7,L8IJ79,L8HUD1,L8J1B1,L8HVI0,L8IJW9,L8IF42,L8HQR6,L8IGL8,L8IHP9,L8IIZ9,L8IM79,L8J224,L8HZL7,L8I109,L8IUT9,L8I4L3,L8IFJ0,L8HX06
3	GO:0031640	killing of cells of other organism	P	1	L8IMB9
3	GO:0006457	protein folding	P	4	L8ICJ2,L8IDW8,L8I1W1,L8I9I2
3	GO:0032922	circadian regulation of gene expression	P	1	L8HW13
3	GO:0006903	vesicle targeting	P	1	L8HXK3
3	GO:0050900	leukocyte migration	P	7	L8IPF6,L8I958,L8I2E4,L8J1B1,L8HXK3,L8IF42,L8IFL3
3	GO:0001816	cytokine production	P	2	L8IJN1,L8IKX5
3	GO:0007586	digestion	P	1	L8IKX5
3	GO:0048771	tissue remodeling	P	15	L8HMB1,L8HXR1,L8J1K1,L8I177,L8IVA1,L8IKX5,L8IK78,L8IXI6,L8HND5,L8IGV0,L8HX06,L8IWP2,L8J3Q3,L8INI7,L8IM29
3	GO:0006804	obsolete peroxidase reaction	P	3	L8IPN7,L8IXW8,L8HT60
3	GO:0007059	chromosome segregation	P	3	L8IE51,L8I463,L8I899
3	GO:0007389	pattern specification process	P	8	L8IIM5,L8I3R4,L8J0I1,L8IVA1,L8I793,L8J3Q3,L8IK78,L8IQ44
3	GO:0007626	locomotory behavior	P	9	L8I0I4,L8IM79,L8J224,L8IBA7,L8J1K1,L8I4L3,L8I7A3,L8I9E0,L8IV54
3	GO:0008037	cell recognition	P	8	L8J0U4,L8HN27,L8IJS0,L8I3L2,L8J224,L8IVA1,L8I4L3,L8IHP9
3	GO:0051606	detection of stimulus	P	7	L8IIM5,L8I3L2,L8I3R4,L8HXR1,L8IGK5,L8INI7,L8IHP9
3	GO:0007267	cell-cell signaling	P	14	L8IN10,L8IUT9,L8J121,L8IMS7,L8IWR9,L8IG16,L8IDK7,L8IX54,L8IPF6,L8IKN2,L8J1B1,L8J3Q3,L8IHP9,L8IIZ9
3	GO:0072089	stem cell proliferation	P	1	L8HND5
3	GO:0042221	response to chemical	P	118	L8IQQ6,L8HSX9,L8J274,L8HXK3,L8IIM5,L8IFV7,L8I958,L8I6V6,L8I8M2,L8J595,L8IT90,L8HK61,L8IJN1,L8IUY7,L8J224,L8IUT9,L8IGX7,L8IIM8,L8IP29,L8IFJ0,L8IB79,L8HQ26,L8HV64,L8IM29,L8J0U4,L8HW49,L8IYJ5,L8IK42,L8ICD7,L8J197,L8I6G2,L8IHJ7,L8IK78,L8IR50,L8HZ66,L8IXI6,L8ICN2,L8II96,L8HND5,L8IH11,L8HSM4,L8I0B0,L8IAA7,L8HYH0,L8I177,L8HW79,L8IGC3,L8I4L3,L8IWR9,L8IPF6,L8I3S5,L8HTX7,L8I3R4,L8IGV0,L8IVX7,L8HQI2,L8IU59,…
3	GO:0019882	antigen processing and presentation	P	9	L8IKN2,L8J2L7,L8I5C0,L8IHA9,L8I2U1,L8IVX7,L8I018,L8HX98,L8HWB6
3	GO:0060478	acrosomal vesicle exocytosis	P	1	L8IKN2
3	GO:0006955	immune response	P	23	L8IU68,L8IM79,L8J2L7,L8IX25,L8HWY2,L8IMB9,L8I2U1,L8I798,L8J1K1,L8IMS7,L8IUY4,L8IVA1,L8I4L3,L8J052,L8J5K4,L8IK78,L8I8M2,L8HPM7,L8J3Q3,L8INI7,L8IBF2,L8IGL8,L8IHP9
3	GO:0016049	cell growth	P	9	L8IM79,L8ICN2,L8IUT9,L8HX06,L8IVA1,L8I4L3,L8INI7,L8J5Y3,L8IHP9
3	GO:0051641	cellular localization	P	56	L8HXR1,L8HWY2,L8IHA9,L8IX69,L8J121,L8IMS7,L8I463,L8I1N5,L8HXK3,L8IG34,L8I018,L8IU59,L8I7Z4,L8IM79,L8J1H5,L8IDJ1,L8I109,L8HNU2,L8HNI0,L8IIM8,L8J4V3,L8HWB6,L8IX54,L8IGD5,L8IEH4,L8I9K6,L8IB79,L8IWC2,L8IWP2,L8IBZ3,L8IS69,L8I3L2,L8HXM6,L8IAC6,L8I9E0,L8IJ79,L8ITU9,L8IKN2,L8ISD0,L8J1T9,L8IH11,L8IS72,L8I0B0,L8I7Q8,L8HYH0,L8I4L3,L8IDK7,L8I3S5,L8HRT7,L8J0L1,L8IT07,L8HX06,L8II73,L8IVX7,L8IIU6,L8HQI2
3	GO:0061744	motor behavior	P	1	L8IM79
3	GO:0045321	leukocyte activation	P	46	L8IQQ6,L8J0I1,L8IMS7,L8J052,L8HRD1,L8IFV7,L8I6V6,L8I284,L8J1B1,L8J3Q3,L8IJW9,L8IB09,L8IF42,L8J0P6,L8IIF1,L8IDE2,L8IUT9,L8IGX7,L8HNI0,L8HWB6,L8HRM3,L8IEH4,L8HZ02,L8I8E6,L8IWP2,L8J0U4,L8HP51,L8J197,L8IBA7,L8IAC6,L8IK78,L8I493,L8I793,L8IFL3,L8IHP9,L8IQ63,L8J1K1,L8I177,L8I4L3,L8J332,L8HRT7,L8IAM6,L8IVX7,L8IIU6,L8IQM1,L8I7V5
3	GO:0007631	feeding behavior	P	4	L8IUT9,L8IGV0,L8HX06,L8I4L3
3	GO:0035988	chondrocyte proliferation	P	3	L8IUT9,L8IM29,L8IYJ5
3	GO:0097167	circadian regulation of translation	P	1	L8I1N5
3	GO:0048856	anatomical structure development	P	110	L8HMB1,L8IQQ6,L8HSX9,L8HX22,L8HXK3,L8IG16,L8IIM5,L8J595,L8I958,L8I8M2,L8IT90,L8IUY7,L8IQ44,L8I7Z4,L8J224,L8IIF1,L8IUT9,L8J2M2,L8I9A3,L8I9K6,L8HL45,L8HQ26,L8IM29,L8J0U4,L8I491,L8IYJ5,L8HW49,L8INB2,L8J197,L8HXM6,L8I6Z9,L8I6G2,L8IHJ7,L8IK78,L8IWJ4,L8IXI6,L8II96,L8IKN2,L8ITU9,L8HND5,L8I0B0,L8IQ63,L8HW02,L8I1W1,L8IAA7,L8I177,L8IGC3,L8IKX5,L8I4L3,L8I3S5,L8I3R4,L8HVH0,L8HUH1,L8IHZ4,L8IQM1,L8HQI2,L8I7V5,…
3	GO:0009653	anatomical structure morphogenesis	P	47	L8IUT8,L8IYJ5,L8I870,L8J0I1,L8HXM6,L8I6Z9,L8IX69,L8IBA7,L8IVA1,L8IK78,L8I9E0,L8IG16,L8IIM5,L8IXI6,L8IJ79,L8J595,L8IIL2,L8IKN2,L8J3Q3,L8I793,L8HSM4,L8J2N7,L8IFL3,L8IHP9,L8IQ44,L8IM79,L8IQ63,L8J224,L8HPA3,L8J1K1,L8IUT9,L8IKX5,L8J2M2,L8HNU2,L8IWR9,L8HNI0,L8HRT7,L8I5C0,L8I3R4,L8HSA3,L8HQN3,L8IWC2,L8IWP2,L8INI7,L8IM29,L8IU59,L8I7V5
3	GO:0003008	system process	P	45	L8J0U4,L8I870,L8I3L2,L8IN10,L8HXR1,L8I798,L8IX69,L8IBA7,L8I463,L8IGK5,L8HX22,L8HXK3,L8I9E0,L8IJ79,L8IED3,L8IKN2,L8I9I2,L8IRV6,L8J3Q3,L8J2N7,L8IF42,L8IFL3,L8I7Z4,L8IM79,L8I612,L8ILQ8,L8HW02,L8I1W1,L8IUT9,L8IGC3,L8I4L3,L8I7A3,L8INI7,L8IDK7,L8I0I4,L8IZ21,L8IT07,L8IGV0,L8ISB9,L8HX06,L8IWP2,L8I8E6,L8IVX7,L8IY25,L8HX98
3	GO:0051775	response to redox state	P	1	L8IFC2
3	GO:0032963	collagen metabolic process	P	5	L8I177,L8INI7,L8IM29,L8IGL8,L8IKT6
3	GO:0002021	response to dietary excess	P	1	L8I9E0
3	GO:0051651	maintenance of location in cell	P	3	L8HNU2,L8I9E0,L8HWY2
3	GO:0001502	cartilage condensation	P	2	L8HVI0,L8IYJ5
3	GO:0060710	chorio-allantoic fusion	P	1	L8IYJ5
3	GO:0044406	adhesion of symbiont to host	P	1	L8I3L2
3	GO:0001550	ovarian cumulus expansion	P	1	L8IWR9
3	GO:0033555	multicellular organismal response to stress	P	2	L8IFL3,L8IKX6
3	GO:0010232	vascular transport	P	1	L8IWP2
3	GO:0007163	establishment or maintenance of cell polarity	P	6	L8IJ79,L8IWP2,L8HSM4,L8HXK3,L8IG16,L8J4V3
3	GO:0008219	cell death	P	14	L8J0U4,L8IYJ5,L8IFC2,L8IVA1,L8IKX5,L8HNU2,L8IK78,L8I9I2,L8IB79,L8IAM6,L8J3Q3,L8IF42,L8IGL8,L8IHP9
3	GO:0051716	cellular response to stimulus	P	94	L8HSX9,L8J274,L8HXK3,L8IIM5,L8IFV7,L8J595,L8I6V6,L8I8M2,L8IJN1,L8J224,L8IUT9,L8IGX7,L8IJG9,L8IIM8,L8IX54,L8IFJ0,L8IB79,L8HQ26,L8I491,L8J197,L8I6G2,L8IHJ7,L8IR50,L8IK78,L8HZ66,L8IXI6,L8ICN2,L8HND5,L8IH11,L8IXR3,L8HSM4,L8I0B0,L8HW02,L8I1W1,L8HYH0,L8I177,L8HW79,L8IGC3,L8I4L3,L8IPF6,L8I3S5,L8I3R4,L8IGV0,L8IVX7,L8HQI2,L8I7V5,L8IFC2,L8HXR1,L8HWY2,L8I798,L8IX69,L8J026,L8IGK5,L8I463,L8I1N5,L8HRD1,L8IED3,…
3	GO:0009719	response to endogenous stimulus	P	68	L8IQQ6,L8HXR1,L8HWY2,L8I798,L8HSX9,L8IX69,L8IGK5,L8I1N5,L8HXK3,L8IIM5,L8IFV7,L8J595,L8IED3,L8I8M2,L8HK61,L8IJX9,L8IJN1,L8J3Q3,L8J224,L8IXW8,L8IUT9,L8J4V3,L8IPN7,L8HQ26,L8IWP2,L8IKX6,L8INI7,L8IM29,L8IUT8,L8HX98,L8IYJ5,L8HW49,L8I3L2,L8ICD7,L8HP51,L8I6G2,L8IK78,L8IXI6,L8IJ79,L8ICN2,L8II96,L8I9I2,L8HND5,L8IH11,L8IA65,L8HSM4,L8HVI0,L8HQI2,L8IFL3,L8I0B0,L8HPA3,L8I966,L8I177,L8J1K1,L8HW79,L8I4L3,L8IWR9,…
3	GO:0001503	ossification	P	5	L8IJ79,L8HVI0,L8IKT6,L8IM29,L8IFL3
3	GO:0002253	activation of immune response	P	7	L8IX25,L8IKT6,L8IFJ0,L8IB79,L8HNI0,L8HX98,L8I0B0
3	GO:0050789	regulation of biological process	P	233	L8HXL7,L8J274,L8J052,L8HXK3,L8IFV7,L8I958,L8I8M2,L8IKT6,L8IJN1,L8J351,L8IJW9,L8IBF2,L8IB09,L8HN27,L8IIF1,L8J2M2,L8HNU2,L8IIM8,L8IX54,L8IP29,L8IEH4,L8IFJ0,L8IB79,L8HPM7,L8HV64,L8IK42,L8I6Z9,L8IHJ7,L8IK78,L8I9E0,L8HRK0,L8IGB4,L8ITU9,L8IHQ3,L8IH11,L8HSM4,L8IV54,L8I0B0,L8I2U1,L8HW02,L8IAA7,L8I7Q8,L8HYH0,L8I177,L8IGC3,L8I4L3,L8IWR9,L8J188,L8I3Z2,L8I3S5,L8I3R4,L8J0L1,L8IU59,L8HQI2,L8I7V5,L8IQM1,L8IFC2,…
3	GO:0044238	primary metabolic process	P	151	L8HMB1,L8HXL7,L8IX25,L8J0I1,L8IHA9,L8IY30,L8J274,L8HX22,L8HXK3,L8IJS0,L8IFV7,L8I958,L8J595,L8I6V6,L8IKT6,L8IT90,L8J0L8,L8IJN1,L8IUY7,L8IUU5,L8IBF2,L8HN01,L8HVY9,L8J1H5,L8IMB9,L8J0P6,L8IUT9,L8I2P8,L8J2M2,L8IGX7,L8I9A3,L8IJG9,L8IP29,L8IEB1,L8IFJ0,L8IB79,L8HQ26,L8HV64,L8IBZ3,L8IM29,L8J0U4,L8INB2,L8IYJ5,L8J197,L8ILP2,L8IHJ7,L8IAC6,L8IK78,L8I9E0,L8HZ66,L8IXI6,L8I944,L8II96,L8IHQ3,L8ITU9,L8IKN2,L8J1T9,…
3	GO:0071704	organic substance metabolic process	P	158	L8HMB1,L8HXL7,L8IX25,L8IH78,L8J0I1,L8IHA9,L8IY30,L8J274,L8HX22,L8J052,L8HXK3,L8IJS0,L8IFV7,L8I958,L8J595,L8I6V6,L8I7C0,L8IKT6,L8IT90,L8J0L8,L8IJN1,L8IUY7,L8IUU5,L8IBF2,L8HN01,L8HVY9,L8J1H5,L8IMB9,L8J0P6,L8IUT9,L8I2P8,L8J2M2,L8IGX7,L8I9A3,L8IJG9,L8IP29,L8IEB1,L8IFJ0,L8IB79,L8HQ26,L8HV64,L8IBZ3,L8IM29,L8J0U4,L8INB2,L8IYJ5,L8IK42,L8J197,L8ILP2,L8IHJ7,L8IAC6,L8IK78,L8I9E0,L8HZ66,L8IXI6,L8I944,L8IGB4,…
3	GO:0044237	cellular metabolic process	P	144	L8HMB1,L8HXL7,L8IH78,L8IHA9,L8J0I1,L8IY30,L8J274,L8HX22,L8J052,L8IJS0,L8I958,L8I6V6,L8I7C0,L8IT90,L8J0L8,L8IJN1,L8IUY7,L8IUU5,L8HVY9,L8J1H5,L8IMB9,L8J0P6,L8IUT9,L8I2P8,L8J2M2,L8IGX7,L8I9A3,L8IJG9,L8IX54,L8IEB1,L8IFJ0,L8IB79,L8HV64,L8IBZ3,L8J0U4,L8INB2,L8IYJ5,L8IK42,L8J197,L8IAC6,L8IR50,L8I9E0,L8IK78,L8HZ66,L8J2E7,L8IXI6,L8I944,L8HRK0,L8IGB4,L8II96,L8ITU9,L8IKN2,L8IHQ3,L8J1T9,L8IH11,L8IJ81,L8I0B0,…
3	GO:0006807	nitrogen compound metabolic process	P	134	L8HMB1,L8HXL7,L8IX25,L8IH78,L8J0I1,L8J274,L8HX22,L8J052,L8HXK3,L8IJS0,L8IFV7,L8I958,L8J595,L8I6V6,L8IKT6,L8IT90,L8J0L8,L8IUU5,L8IBF2,L8HN01,L8HVY9,L8J1H5,L8IMB9,L8J0P6,L8IUT9,L8J2M2,L8IGX7,L8I9A3,L8IJG9,L8IP29,L8IEB1,L8IFJ0,L8IB79,L8HQ26,L8HV64,L8IM29,L8J0U4,L8INB2,L8IYJ5,L8IK42,L8J197,L8IHJ7,L8IAC6,L8IK78,L8I9E0,L8HZ66,L8IXI6,L8I944,L8II96,L8IHQ3,L8ITU9,L8IKN2,L8J1T9,L8IH11,L8IJ81,L8I0B0,L8HW02,…
3	GO:0007611	learning or memory	P	13	L8HX98,L8IX69,L8IUT9,L8I463,L8IGK5,L8I4L3,L8I7A3,L8I9E0,L8IDK7,L8I0I4,L8IZ21,L8HX06,L8IFL3
3	GO:0009628	response to abiotic stimulus	P	58	L8IFC2,L8HXR1,L8HWY2,L8I798,L8IX69,L8I463,L8IGK5,L8I1N5,L8HXK3,L8HRD1,L8IIM5,L8I958,L8IED3,L8I6V6,L8ICD6,L8J3Q3,L8IGL8,L8IM79,L8IUT9,L8IAH1,L8IGX7,L8J4V3,L8ISB9,L8IWP2,L8IKX6,L8INI7,L8IM29,L8I491,L8J0U4,L8IYJ5,L8I870,L8HX98,L8HZ66,L8J2E7,L8IJ79,L8ICN2,L8IKN2,L8I9I2,L8HND5,L8IH11,L8IDW8,L8I793,L8HVI0,L8IFL3,L8IZX3,L8IAA7,L8HYH0,L8J1K1,L8I177,L8IGC3,L8I4L3,L8IZ21,L8IGV0,L8HX06,L8IAM6,L8II73,L8HQI2,…
3	GO:0009056	catabolic process	P	68	L8HXL7,L8HWY2,L8IY30,L8IX69,L8IMS7,L8IGK5,L8I1N5,L8IJS0,L8I958,L8I6V6,L8ICD6,L8IKT6,L8HRW8,L8IJX9,L8HMZ8,L8IJN1,L8IUU5,L8IU59,L8IGL8,L8IM79,L8IDJ1,L8J0P6,L8I2P8,L8IGX7,L8I9A3,L8HYP7,L8HWB6,L8HT60,L8IX54,L8IGD5,L8I5C0,L8HZ02,L8IUR0,L8IB79,L8I8E6,L8HV64,L8IKX6,L8IBZ3,L8IM29,L8IS69,L8J0U4,L8HX98,L8I3L2,L8J197,L8IBA7,L8IC85,L8IR50,L8I9E0,L8HZ66,L8HRK0,L8I944,L8IH11,L8IJ81,L8IZX3,L8ILQ8,L8HW02,L8I966,…
3	GO:0044281	small molecule metabolic process	P	62	L8HMB1,L8HWY2,L8IH78,L8IY30,L8J274,L8J052,L8I6V6,L8I7C0,L8IT90,L8ICD6,L8J0L8,L8IJX9,L8HRW8,L8IJN1,L8IUY7,L8IUU5,L8IM79,L8J0P6,L8IXW8,L8IUT9,L8I9H6,L8IUY4,L8I7A3,L8IGX7,L8I9A3,L8IPN7,L8HZ02,L8I8E6,L8HV64,L8IKX6,L8IBZ3,L8IS69,L8J0U4,L8IK42,L8IUT8,L8I870,L8I3L2,L8J197,L8IBA7,L8IC85,L8I9E0,L8HZ66,L8J1X3,L8IJ79,L8IIL2,L8IDW8,L8HQI2,L8IJ81,L8IZX3,L8IPA4,L8I966,L8J1K1,L8I177,L8I4L3,L8IKX5,L8HXP8,L8I0I4,…
3	GO:0016043	cellular component organization	P	125	L8HRF0,L8IHA9,L8HX22,L8HXK3,L8IG16,L8IIM5,L8IJS0,L8J595,L8I6V6,L8I958,L8IKT6,L8IJN1,L8IJW9,L8J1H5,L8IMB9,L8J224,L8IUT9,L8IGX7,L8HNU2,L8IJG9,L8IIM8,L8IX54,L8HL45,L8IB79,L8HQ26,L8HV64,L8IBZ3,L8IM29,L8INB2,L8J0U4,L8IK78,L8I9E0,L8IR50,L8J5Y3,L8J2E7,L8IXI6,L8HRK0,L8I944,L8ITU9,L8IHQ3,L8IKN2,L8HND5,L8HSM4,L8I0B0,L8IQ63,L8HW02,L8IPA4,L8IAA7,L8I7Q8,L8HYH0,L8HZL7,L8I177,L8HW79,L8IGC3,L8I4L3,L8IKX5,L8IWR9,…
3	GO:0065009	regulation of molecular function	P	100	L8IQQ6,L8IX25,L8HRF0,L8IH78,L8IHA9,L8HSX9,L8IIM5,L8IJS0,L8IFV7,L8J595,L8I958,L8HK61,L8IJN1,L8IBF2,L8IB09,L8HN27,L8J224,L8HW35,L8IIF1,L8IUT9,L8HNU2,L8IIM8,L8IEH4,L8IK42,L8HW49,L8IYJ5,L8ICD7,L8HXM6,L8I6Z9,L8ILP2,L8IK78,L8I9E0,L8J5Y3,L8IR50,L8II96,L8IHQ3,L8HND5,L8IH11,L8IXR3,L8HSM4,L8IJ81,L8IV54,L8I0B0,L8I177,L8HW79,L8IGC3,L8I4L3,L8IWR9,L8I3Z2,L8IPF6,L8I3S5,L8HTX7,L8I3R4,L8IVX7,L8HQI2,L8I7V5,L8IFC2,…
3	GO:0051234	establishment of localization	P	141	L8IQQ6,L8IX25,L8IT79,L8IH78,L8J0I1,L8IHA9,L8IY30,L8HX22,L8J052,L8HXK3,L8IB26,L8IIM5,L8I6V6,L8I7C0,L8IT90,L8IJN1,L8IG34,L8I7Z4,L8HVY9,L8J1H5,L8J0P6,L8IIF1,L8IUT9,L8IGX7,L8I9A3,L8IIM8,L8IX54,L8IEH4,L8I9K6,L8IJ35,L8IB79,L8HPM7,L8HQ26,L8IBZ3,L8I491,L8IK42,L8J0U4,L8IYJ5,L8ICD7,L8J197,L8HXM6,L8IAC6,L8IK78,L8I9E0,L8J5Y3,L8IWJ4,L8IXI6,L8ITU9,L8IHQ3,L8IKN2,L8J1T9,L8HND5,L8IH11,L8HQR6,L8I0B0,L8I2U1,L8IQ63,…
3	GO:0009058	biosynthetic process	P	61	L8I6J8,L8HWY2,L8IHA9,L8HSH3,L8HX22,L8I1N5,L8I958,L8I6V6,L8I7C0,L8ICD6,L8J0L8,L8HRW8,L8IJX9,L8IUY7,L8IUU5,L8I018,L8I9H6,L8IUY4,L8IGX7,L8I9A3,L8IJG9,L8IFJ0,L8HQN3,L8I8E6,L8HV64,L8IKX6,L8IBZ3,L8I2V5,L8J0U4,L8IYJ5,L8I870,L8I3L2,L8J197,L8IBA7,L8IC85,L8IK78,L8I9E0,L8HZ66,L8J2E7,L8I944,L8J1X3,L8IGB4,L8HVI0,L8IJ81,L8IZX3,L8I662,L8HPA3,L8I966,L8HZL7,L8J1K1,L8I177,L8IKX5,L8IWR9,L8HXP8,L8J188,L8I0I4,L8IDK5,…
3	GO:0006950	response to stress	P	103	L8IFC2,L8IQQ6,L8HWY2,L8HXR1,L8I798,L8IX69,L8HSX9,L8IMS7,L8I463,L8J274,L8J052,L8I1N5,L8HRD1,L8IIM5,L8J1B9,L8IFV7,L8J595,L8I6V6,L8I8M2,L8I958,L8ICD6,L8HMZ8,L8IUY7,L8J3Q3,L8IF42,L8IGL8,L8IQ44,L8IB09,L8IU68,L8IM79,L8J224,L8IMB9,L8IXW8,L8IUT9,L8I9H6,L8IUY4,L8IGX7,L8IJG9,L8IIM8,L8J4V3,L8HT60,L8IX54,L8IP29,L8IPN7,L8IB79,L8HQN3,L8HQ26,L8ISB9,L8IWP2,L8HPM7,L8IKX6,L8INI7,L8IM29,L8IS69,L8IK42,L8J0U4,L8I491,…
3	GO:0009605	response to external stimulus	P	74	L8IFC2,L8IQQ6,L8HXR1,L8HWY2,L8IHA9,L8I798,L8IX69,L8IMS7,L8IGK5,L8J274,L8J026,L8J052,L8HXK3,L8IIM5,L8J1B9,L8IFV7,L8IED3,L8I8M2,L8ICD6,L8HK61,L8HMZ8,L8IJN1,L8IUY7,L8IRV6,L8I018,L8IGL8,L8IF42,L8IU68,L8IM79,L8J224,L8IMB9,L8J0P6,L8IUT9,L8IUY4,L8HNI0,L8IIM8,L8J4V3,L8IX54,L8IGD5,L8I5C0,L8IFJ0,L8HZ02,L8HQ26,L8HPM7,L8IWP2,L8IKX6,L8IM29,L8J0U4,L8I491,L8I3L2,L8ICD7,L8IK78,L8IR50,L8I9E0,L8IXI6,L8IJ79,L8ICN2,…
3	GO:0009607	response to biotic stimulus	P	49	L8IQQ6,L8HWY2,L8HXR1,L8IHA9,L8I798,L8IX69,L8IMS7,L8J052,L8IFV7,L8I8M2,L8HK61,L8HMZ8,L8IJN1,L8IUY7,L8I018,L8IGL8,L8IF42,L8IM79,L8J224,L8IMB9,L8J0P6,L8IUY4,L8HNI0,L8IIM8,L8IGD5,L8IFJ0,L8HZ02,L8HQ26,L8HPM7,L8IWP2,L8IKX6,L8J0U4,L8I3L2,L8IK78,L8IXI6,L8IJ79,L8IGB4,L8HND5,L8IH11,L8I793,L8I0B0,L8I177,L8J1K1,L8I4L3,L8J5K4,L8HTX7,L8II73,L8IAM6,L8HQI2
3	GO:0071827	plasma lipoprotein particle organization	P	9	L8HWS9,L8I3L2,L8HTX7,L8IHQ3,L8IHA9,L8IJX9,L8HX06,L8I018,L8I9E0
3	GO:0034381	plasma lipoprotein particle clearance	P	7	L8I3L2,L8HTX7,L8IHQ3,L8IX69,L8IKX5,L8I9E0,L8HQI2
3	GO:0051707	response to other organism	P	33	L8IQQ6,L8HWY2,L8HXR1,L8IHA9,L8I798,L8IMS7,L8J052,L8IK78,L8HK61,L8HMZ8,L8IJN1,L8IUY7,L8I793,L8I018,L8IGL8,L8IF42,L8I0B0,L8IM79,L8IMB9,L8J0P6,L8J1K1,L8I177,L8IUY4,L8I4L3,L8J5K4,L8HNI0,L8IIM8,L8IGD5,L8HTX7,L8HZ02,L8HQ26,L8HPM7,L8HQI2
3	GO:0048609	multicellular organismal reproductive process	P	27	L8HP51,L8IBA7,L8IC85,L8IK78,L8IJS0,L8IXI6,L8IT90,L8J3Q3,L8IHP9,L8IFL3,L8I1W1,L8IXW8,L8IIF1,L8I177,L8I4L3,L8I7A3,L8J2M2,L8IWR9,L8J4V3,L8IDK5,L8IZ21,L8IGD5,L8HQ26,L8I8E6,L8IAM6,L8IWP2,L8HUH1
3	GO:0022602	ovulation cycle process	P	6	L8HQ26,L8HX06,L8IWR9,L8IT90,L8HXK3,L8I7V5
3	GO:0033036	macromolecule localization	P	54	L8HXR1,L8IHA9,L8HWY2,L8IX69,L8J121,L8IMS7,L8I6V6,L8IT90,L8I284,L8IG34,L8I018,L8I7Z4,L8J1H5,L8I109,L8IAH1,L8IGX7,L8HNU2,L8IIM8,L8J4V3,L8HWB6,L8IX54,L8IGD5,L8IEH4,L8I9K6,L8IB79,L8IWC2,L8IWP2,L8IBZ3,L8IS69,L8I3L2,L8HXM6,L8IAC6,L8IK78,L8I9E0,L8IJ79,L8ITU9,L8IKN2,L8J1T9,L8HND5,L8IH11,L8IS72,L8I793,L8HQI2,L8I0B0,L8I7Q8,L8HYH0,L8I0I4,L8HRT7,L8J0L1,L8IT07,L8HX06,L8IVX7,L8IAB5,L8IU59
3	GO:0048869	cellular developmental process	P	74	L8IFC2,L8HXR1,L8IY30,L8IX69,L8IMS7,L8HX22,L8I1N5,L8HXK3,L8IG16,L8HRD1,L8IFV7,L8I958,L8IJN1,L8IUY7,L8IUU5,L8IRV6,L8ICV2,L8J3Q3,L8IGL8,L8IB09,L8IM79,L8J224,L8IIF1,L8IUT9,L8I109,L8J2M2,L8HNI0,L8HNU2,L8J4V3,L8HLW7,L8HQN3,L8IWP2,L8INI7,L8IM29,L8IS69,L8J0U4,L8HW49,L8IYJ5,L8I870,L8J197,L8IBA7,L8IVA1,L8IHJ7,L8IK78,L8HZ66,L8J2E7,L8IXI6,L8IJ79,L8IKN2,L8HUD1,L8HND5,L8IH11,L8IE45,L8IDW8,L8HSM4,L8I793,L8IFL3,…
3	GO:0044085	cellular component biogenesis	P	2	L8IH11,L8IUY4
3	GO:0035036	sperm-egg recognition	P	3	L8J0U4,L8HN27,L8IJS0
3	GO:0140352	export from cell	P	61	L8IQQ6,L8IX25,L8IH78,L8J0I1,L8IMS7,L8J052,L8HXK3,L8IED3,L8I6V6,L8I284,L8J1B1,L8IRV6,L8IU59,L8IF42,L8J0P6,L8IIF1,L8IDE2,L8IUT9,L8IGX7,L8HWB6,L8HRM3,L8IEH4,L8HZ02,L8HPM7,L8I8E6,L8IK42,L8J0U4,L8I491,L8I870,L8IYJ5,L8IN10,L8HP51,L8J197,L8IBA7,L8IAC6,L8IK78,L8IXI6,L8IBF6,L8IKN2,L8I493,L8HND5,L8IE45,L8I793,L8HVI0,L8J2N7,L8HQR6,L8I0B0,L8I612,L8IQ63,L8I177,L8I4L3,L8IDK7,L8IHV8,L8J332,L8I0I4,L8HRT7,L8IAM6,…
3	GO:0002209	behavioral defense response	P	1	L8IFL3
3	GO:0042330	taxis	P	15	L8IYJ5,L8J224,L8HPA3,L8IIF1,L8IVA1,L8I4L3,L8IPF6,L8IJ79,L8HUD1,L8J1B1,L8IAM6,L8HVI0,L8INI7,L8IFL3,L8I7V5
3	GO:0048870	cell motility	P	32	L8IYJ5,L8I3L2,L8I2E4,L8IBA7,L8IVA1,L8HXK3,L8IG16,L8IK78,L8HZ66,L8IJS0,L8IXI6,L8IJ79,L8I958,L8J1B1,L8HVI0,L8IJW9,L8IF42,L8IFL3,L8IM79,L8J224,L8IAA7,L8HPA3,L8HZL7,L8HPT2,L8IUT9,L8IPF6,L8J0L1,L8IWP2,L8IBZ3,L8INI7,L8IM29,L8I7V5
3	GO:0006928	movement of cell or subcellular component	P	37	L8IYJ5,L8I3L2,L8I2E4,L8HXM6,L8IX69,L8IBA7,L8IVA1,L8HXK3,L8IG16,L8IK78,L8HZ66,L8IJS0,L8IXI6,L8IJ79,L8I958,L8HUD1,L8J1B1,L8HVI0,L8IJW9,L8IF42,L8IFL3,L8IM79,L8J224,L8IAA7,L8HPA3,L8HZL7,L8HPT2,L8IUT9,L8I4L3,L8I7A3,L8IPF6,L8J0L1,L8IWP2,L8IBZ3,L8INI7,L8IM29,L8I7V5
3	GO:0001775	cell activation	P	48	L8IQQ6,L8J0I1,L8IMS7,L8IGK5,L8J052,L8HRD1,L8IFV7,L8I6V6,L8I284,L8J1B1,L8J3Q3,L8IJW9,L8IB09,L8IF42,L8J0P6,L8IIF1,L8IDE2,L8IUT9,L8IGX7,L8HNI0,L8HWB6,L8HRM3,L8IEH4,L8HZ02,L8I8E6,L8IWP2,L8J0U4,L8HP51,L8J197,L8IBA7,L8IAC6,L8IK78,L8I493,L8I793,L8IFL3,L8IHP9,L8IQ63,L8J1K1,L8I177,L8I4L3,L8J332,L8HRT7,L8HX06,L8IAM6,L8IVX7,L8IIU6,L8IQM1,L8I7V5
3	GO:0002252	immune effector process	P	41	L8IQQ6,L8IX25,L8J0I1,L8IMS7,L8J052,L8I6V6,L8I284,L8HMZ8,L8J1B1,L8J3Q3,L8IB09,L8IF42,L8J0P6,L8IIF1,L8IDE2,L8IUY4,L8IGX7,L8IIM8,L8HWB6,L8HRM3,L8IEH4,L8HZ02,L8I8E6,L8J0U4,L8HP51,L8J197,L8IBA7,L8IAC6,L8IK78,L8I493,L8IFL3,L8IHP9,L8IQ63,L8J1K1,L8I177,L8I4L3,L8J332,L8IAM6,L8IVX7,L8IIU6,L8IQM1
3	GO:0048589	developmental growth	P	22	L8IM79,L8HYH0,L8IIF1,L8IUT9,L8IVA1,L8I4L3,L8IK78,L8J5Y3,L8I793,L8IED3,L8IIL2,L8ICN2,L8IHP9,L8IRV6,L8HX06,L8IWP2,L8IAM6,L8J3Q3,L8HVI0,L8IGL8,L8IFL3,L8I7V5
3	GO:0003006	developmental process involved in reproduction	P	24	L8IYJ5,L8IBA7,L8IK78,L8IIM5,L8IXI6,L8J1X3,L8IBF6,L8IIL2,L8HND5,L8J3Q3,L8HSM4,L8HVI0,L8IGL8,L8IFL3,L8IIF1,L8J2M2,L8IWR9,L8IDK5,L8I9K6,L8II73,L8IWP2,L8IKX6,L8IM29,L8I7V5
3	GO:0022412	cellular process involved in reproduction in multicellular organism	P	4	L8IBA7,L8IWR9,L8HXK3,L8IFL3
3	GO:0007154	cell communication	P	27	L8I491,L8IFC2,L8IN10,L8IX69,L8J121,L8IMS7,L8J274,L8IR50,L8IG16,L8IXI6,L8ICN2,L8ICD6,L8IKN2,L8J1B1,L8J3Q3,L8IHP9,L8IFL3,L8I0B0,L8IIZ9,L8IUT9,L8IGC3,L8IWR9,L8IDK7,L8IX54,L8IPF6,L8HQ26,L8IWP2
3	GO:0032259	methylation	P	5	L8IJS0,L8ILQ8,L8ITU9,L8IKN2,L8IS72
3	GO:0050817	coagulation	P	5	L8HWS9,L8I612,L8II96,L8HSX9,L8IIU6
3	GO:0030534	adult behavior	P	6	L8I0I4,L8IM79,L8J224,L8IBA7,L8I4L3,L8I7A3
3	GO:0072376	protein activation cascade	P	3	L8IIG2,L8IX25,L8I798
3	GO:0046034	ATP metabolic process	P	9	L8J0U4,L8IZX3,L8ICD6,L8HWY2,L8I8E6,L8HV64,L8IAH1,L8HXP8,L8HZ66
3	GO:0019674	NAD metabolic process	P	7	L8J0U4,L8IZX3,L8ICD6,L8HWY2,L8I8E6,L8HV64,L8HXP8
3	GO:0006734	NADH metabolic process	P	7	L8J0U4,L8IZX3,L8ICD6,L8HWY2,L8I8E6,L8HV64,L8HXP8
3	GO:0006739	NADP metabolic process	P	3	L8J0U4,L8IC85,L8HV64
3	GO:0051705	multi-organism behavior	P	3	L8I7A3,L8I798,L8I4L3
3	GO:0050673	epithelial cell proliferation	P	9	L8IU68,L8IYJ5,L8I3L2,L8IAA7,L8I798,L8HVI0,L8IK78,L8IM29,L8IWR9
3	GO:0097722	sperm motility	P	2	L8IJS0,L8HZ66
3	GO:0007017	microtubule-based process	P	10	L8IX54,L8IJ79,L8HXR1,L8HXM6,L8I9I2,L8I463,L8IWP2,L8I4L3,L8HXK3,L8J4V3
3	GO:0022402	cell cycle process	P	18	L8IQQ6,L8I899,L8HRF0,L8IHA9,L8I463,L8IWR9,L8IK78,L8HXK3,L8IIM5,L8IJ79,L8J0L1,L8HND5,L8IE45,L8HQN3,L8IWP2,L8I793,L8I018,L8I0B0
3	GO:0044703	multi-organism reproductive process	P	4	L8I491,L8IBA7,L8HX06,L8IM79
3	GO:0044706	multi-multicellular organism process	P	3	L8I491,L8IBA7,L8HX06
3	GO:0014874	response to stimulus involved in regulation of muscle adaptation	P	1	L8HX06
3	GO:0031214	biomineral tissue development	P	2	L8HQI2,L8HPA3
3	GO:0048871	multicellular organismal homeostasis	P	5	L8J3Q3,L8HX22,L8J224,L8HQI2,L8IUY7
3	GO:0030029	actin filament-based process	P	12	L8IM79,L8HW13,L8IHA9,L8J121,L8HNU2,L8HXK3,L8IJ79,L8HLW7,L8J0L1,L8IRV6,L8I018,L8I7V5
3	GO:0048646	anatomical structure formation involved in morphogenesis	P	22	L8IUT8,L8HW49,L8IYJ5,L8IM79,L8HXR1,L8IAA7,L8HZL7,L8IVA1,L8HNU2,L8IK78,L8HXK3,L8IG16,L8I958,L8HQ26,L8IAM6,L8HSM4,L8I793,L8J3Q3,L8INI7,L8IM29,L8IGL8,L8I7V5
3	GO:0044419	interspecies interaction between organisms	P	20	L8I3L2,L8HXR1,L8IMB9,L8IPA4,L8IGC3,L8I9E0,L8IIM8,L8HWB6,L8J1B9,L8IDK5,L8I3S5,L8IXI6,L8IGD5,L8HLW7,L8HMZ8,L8IFJ0,L8I793,L8IVX7,L8I018,L8IHP9
3	GO:0098727	maintenance of cell number	P	3	L8J3Q3,L8I793,L8IK78
3	GO:0019827	stem cell population maintenance	P	3	L8J3Q3,L8I793,L8IK78
3	GO:0051235	maintenance of location	P	9	L8IUT8,L8IIM5,L8I3S5,L8HWY2,L8HXR1,L8IBA7,L8J1K1,L8HNU2,L8I9E0
3	GO:0051703	intraspecies interaction between organisms	P	1	L8I7A3
3	GO:0019098	reproductive behavior	P	3	L8IBA7,L8I4L3,L8I7A3
3	GO:0006949	syncytium formation	P	2	L8HXK3,L8HXR1
3	GO:0140253	cell-cell fusion	P	2	L8HXK3,L8HXR1
3	GO:1902579	multi-organism localization	P	4	L8IGD5,L8HXR1,L8IIM8,L8HWB6
3	GO:0031294	lymphocyte costimulation	P	1	L8HXR1
3	GO:0035637	multicellular organismal signaling	P	1	L8HXR1
3	GO:1903046	meiotic cell cycle process	P	2	L8IWR9,L8HXK3
3	GO:0001763	morphogenesis of a branching structure	P	6	L8IIM5,L8I5C0,L8J224,L8IUT9,L8IK78,L8IM29
3	GO:0042440	pigment metabolic process	P	4	L8IUU5,L8HVY9,L8IGC3,L8I966
3	GO:1990748	cellular detoxification	P	4	L8J1K1,L8IPN7,L8I9E0,L8HT60
3	GO:0007272	ensheathment of neurons	P	5	L8IM79,L8IUY7,L8IBA7,L8IUT9,L8IQ44
3	GO:0070085	glycosylation	P	2	L8II96,L8I2V5
3	GO:0052192	movement in environment of other organism involved in symbiotic interaction	P	1	L8HWB6
3	GO:0022406	membrane docking	P	4	L8IVX7,L8IKN2,L8I7Q8,L8HWB6
3	GO:0061919	process utilizing autophagic mechanism	P	10	L8IM79,L8IMS7,L8IR50,L8HWB6,L8IX54,L8HRK0,L8I944,L8IUR0,L8IAB5,L8IS69
3	GO:0019748	secondary metabolic process	P	2	L8IUU5,L8II73
3	GO:0007622	rhythmic behavior	P	1	L8II73
3	GO:0061687	detoxification of inorganic compound	P	1	L8J1K1
3	GO:0022404	molting cycle process	P	4	L8J1K1,L8J1X3,L8J2M2,L8IK78
3	GO:0001776	leukocyte homeostasis	P	1	L8HSA3
3	GO:0002532	production of molecular mediator involved in inflammatory response	P	2	L8J188,L8I6J8
3	GO:0001909	leukocyte mediated cytotoxicity	P	1	L8IHP9
3	GO:0070661	leukocyte proliferation	P	4	L8IWP2,L8HNI0,L8IJW9,L8IHP9
3	GO:0009566	fertilization	P	2	L8IFV7,L8IBF6
3	GO:0048066	developmental pigmentation	P	1	L8J0I1
3	GO:0022611	dormancy process	P	1	L8IJN1
3	GO:0030431	sleep	P	1	L8IJN1
3	GO:0140029	exocytic process	P	2	L8IKN2,L8IVX7
3	GO:0021700	developmental maturation	P	8	L8IXI6,L8J1H5,L8IKN2,L8J026,L8IWP2,L8I4L3,L8IWR9,L8IDK7
3	GO:0032941	secretion by tissue	P	2	L8IVX7,L8IWP2
3	GO:0007638	mechanosensory behavior	P	1	L8I870
3	GO:0033059	cellular pigmentation	P	1	L8J026
3	GO:0043476	pigment accumulation	P	1	L8J026
3	GO:0007632	visual behavior	P	2	L8I463,L8I4L3
3	GO:0072111	cell proliferation involved in kidney development	P	1	L8I7V5
3	GO:0048266	behavioral response to pain	P	1	L8IUT9
3	GO:0007635	chemosensory behavior	P	1	L8IUT9
3	GO:0043696	dedifferentiation	P	1	L8I1N5
3	GO:0045058	T cell selection	P	2	L8IJ79,L8J3Q3
3	GO:0002262	myeloid cell homeostasis	P	2	L8IXI6,L8IGC3
3	GO:0048532	anatomical structure arrangement	P	2	L8IVA1,L8J3Q3
3	GO:0035640	exploration behavior	P	1	L8I9E0
3	GO:0097242	amyloid-beta clearance	P	1	L8IX69
3	GO:0033002	muscle cell proliferation	P	1	L8HVI0
4	GO:0003014	renal system process	P	4	L8HX06,L8IWP2,L8J2N7,L8HX98
4	GO:0007613	memory	P	11	L8IZ21,L8IFL3,L8IX69,L8IUT9,L8I463,L8IGK5,L8I4L3,L8I7A3,L8I9E0,L8HX98,L8IDK7
4	GO:0002682	regulation of immune system process	P	61	L8I6J8,L8IX25,L8HXR1,L8HWY2,L8IX69,L8J026,L8J052,L8J1B9,L8J595,L8I6V6,L8I8M2,L8I958,L8IKT6,L8J1B1,L8IRV6,L8J3Q3,L8IU59,L8IB09,L8IF42,L8IU68,L8HVY9,L8IAH1,L8IGX7,L8HNI0,L8J2M2,L8HYP7,L8IFJ0,L8IB79,L8HPM7,L8IM29,L8IUT8,L8HX98,L8HXM6,L8IHJ7,L8IK78,L8I9E0,L8IXI6,L8IJ79,L8IIL2,L8I493,L8IA65,L8I793,L8HVI0,L8IV54,L8IFL3,L8I0B0,L8IHP9,L8I2U1,L8IAA7,L8HPA3,L8I177,L8IGC3,L8I4L3,L8IWR9,L8J5K4,L8J188,L8IPF6,…
4	GO:0042493	response to drug	P	48	L8J0U4,L8IFC2,L8ICD7,L8HP51,L8HWY2,L8HXR1,L8I798,L8IX69,L8I463,L8IVA1,L8I1N5,L8IK78,L8IR50,L8IXI6,L8IFV7,L8IJ79,L8I958,L8I6V6,L8I8M2,L8IIL2,L8IED3,L8ICN2,L8J595,L8ICD6,L8IJN1,L8I9I2,L8HND5,L8IRV6,L8IH11,L8J3Q3,L8IGL8,L8IFL3,L8I0B0,L8IF42,L8HPA3,L8I177,L8IUT9,L8IGC3,L8IGX7,L8J4V3,L8IDK5,L8IZ21,L8I3R4,L8IGV0,L8II73,L8IKX6,L8HQI2,L8I7V5
4	GO:0018158	protein oxidation	P	3	L8HTX7,L8IAA7,L8HPA3
4	GO:0034384	high-density lipoprotein particle clearance	P	4	L8HTX7,L8I9E0,L8I3L2,L8IX69
4	GO:0001542	ovulation from ovarian follicle	P	2	L8IT90,L8HQ26
4	GO:0010033	response to organic substance	P	99	L8IQQ6,L8HSX9,L8J274,L8HXK3,L8IIM5,L8IFV7,L8I958,L8J595,L8I8M2,L8IT90,L8HK61,L8IJN1,L8IUY7,L8J224,L8IUT9,L8IIM8,L8IP29,L8IFJ0,L8HQ26,L8HV64,L8IM29,L8J0U4,L8HW49,L8IYJ5,L8IK42,L8ICD7,L8J197,L8I6G2,L8IHJ7,L8IK78,L8IR50,L8IXI6,L8II96,L8ICN2,L8HND5,L8IH11,L8HSM4,L8I0B0,L8I177,L8HW79,L8I4L3,L8IWR9,L8IPF6,L8I3S5,L8HTX7,L8I3R4,L8IGV0,L8IVX7,L8IU59,L8HQI2,L8I7V5,L8IFC2,L8I2E4,L8HWY2,L8HXR1,L8I798,L8IX69,…
4	GO:0060395	SMAD protein signal transduction	P	4	L8IBA7,L8IT90,L8HLW7,L8I793
4	GO:0009612	response to mechanical stimulus	P	16	L8I491,L8HXR1,L8HYH0,L8IUT9,L8IGK5,L8I4L3,L8HXK3,L8J4V3,L8IIM5,L8IJ79,L8IED3,L8IH11,L8HX06,L8IWP2,L8IM29,L8IFL3
4	GO:0140112	extracellular vesicle biogenesis	P	1	L8IH11
4	GO:0007339	binding of sperm to zona pellucida	P	3	L8J0U4,L8HN27,L8IJS0
4	GO:0001662	behavioral fear response	P	1	L8IFL3
4	GO:0007612	learning	P	8	L8I0I4,L8IUT9,L8HX06,L8I463,L8I4L3,L8I7A3,L8HX98,L8IFL3
4	GO:0008360	regulation of cell shape	P	6	L8J0U4,L8IJ79,L8IBA7,L8HNU2,L8IFL3,L8HXK3
4	GO:0021542	dentate gyrus development	P	1	L8IFL3
4	GO:0021681	cerebellar granular layer development	P	1	L8IFL3
4	GO:0021794	thalamus development	P	1	L8IFL3
4	GO:0021987	cerebral cortex development	P	4	L8I491,L8IUT9,L8IFL3,L8IX69
4	GO:0042246	tissue regeneration	P	10	L8IED3,L8IIL2,L8IIF1,L8IRV6,L8IWP2,L8IAM6,L8HVI0,L8IK78,L8IGL8,L8IFL3
4	GO:0043932	ossification involved in bone remodeling	P	1	L8IFL3
4	GO:0044849	estrous cycle	P	1	L8IFL3
4	GO:0046697	decidualization	P	2	L8IWP2,L8IFL3
4	GO:0050795	regulation of behavior	P	4	L8IGV0,L8IWP2,L8I9E0,L8IFL3
4	GO:1990089	response to nerve growth factor	P	4	L8IUT9,L8I4L3,L8IFL3,L8I0B0
4	GO:0007596	blood coagulation	P	5	L8HWS9,L8I612,L8II96,L8HSX9,L8IIU6
4	GO:0008344	adult locomotory behavior	P	6	L8I0I4,L8IM79,L8J224,L8IBA7,L8I4L3,L8I7A3
4	GO:0048167	regulation of synaptic plasticity	P	17	L8HX98,L8J224,L8IHA9,L8IUT9,L8I463,L8IGK5,L8I4L3,L8I9E0,L8IDK7,L8I0I4,L8IKN2,L8HX06,L8II73,L8IVX7,L8I018,L8IS69,L8IFL3
4	GO:0050803	regulation of synapse structure or activity	P	1	L8I0I4
4	GO:0072378	blood coagulation, fibrin clot formation	P	1	L8IIG2
4	GO:0046716	muscle cell cellular homeostasis	P	4	L8J0U4,L8HXR1,L8HPA3,L8HV64
4	GO:0002250	adaptive immune response	P	3	L8J3Q3,L8I798,L8IHP9
4	GO:0045087	innate immune response	P	8	L8HWY2,L8IMB9,L8I798,L8IMS7,L8IUY4,L8J052,L8J5K4,L8IGL8
4	GO:0072377	blood coagulation, common pathway	P	1	L8I798
4	GO:0030317	flagellated sperm motility	P	2	L8IJS0,L8HZ66
4	GO:0030010	establishment of cell polarity	P	4	L8IJ79,L8IWP2,L8HXK3,L8J4V3
4	GO:0031647	regulation of protein stability	P	12	L8I662,L8J224,L8HW79,L8IAC6,L8J4V3,L8HTX7,L8ITU9,L8I3R4,L8I9I2,L8IS72,L8I793,L8IBZ3
4	GO:0032204	regulation of telomere maintenance	P	3	L8I1N5,L8IDJ1,L8J4V3
4	GO:0046677	response to antibiotic	P	25	L8I870,L8IFC2,L8I798,L8I1N5,L8IR50,L8IXI6,L8IFV7,L8IJ79,L8J595,L8ICN2,L8ICD6,L8I9I2,L8IH11,L8IRV6,L8IF42,L8I0B0,L8I177,L8J1K1,L8IGC3,L8J4V3,L8IGV0,L8II73,L8IKX6,L8HQI2,L8I7V5
4	GO:0036342	post-anal tail morphogenesis	P	1	L8HXM6
4	GO:0009617	response to bacterium	P	17	L8IQQ6,L8IM79,L8HXR1,L8IMB9,L8I798,L8J0P6,L8I4L3,L8IK78,L8IIM8,L8HTX7,L8HK61,L8HZ02,L8IJN1,L8IUY7,L8HQ26,L8HQI2,L8I0B0
4	GO:0032506	cytokinetic process	P	7	L8IQQ6,L8IJ79,L8IHA9,L8J0L1,L8IE45,L8I018,L8HXK3
4	GO:0006979	response to oxidative stress	P	29	L8IFC2,L8I463,L8J274,L8I1N5,L8IR50,L8I9E0,L8IIM5,L8IXI6,L8IFV7,L8IJ79,L8J595,L8IIL2,L8ICN2,L8ICD6,L8I9I2,L8IH11,L8IF42,L8I0B0,L8IQ44,L8IXW8,L8HYH0,L8I177,L8IGC3,L8HT60,L8IPN7,L8II73,L8IM29,L8HQI2,L8I7V5
4	GO:0009636	response to toxic substance	P	27	L8J0U4,L8IFC2,L8HWY2,L8I798,L8I463,L8IR50,L8IXI6,L8IFV7,L8IJ79,L8I958,L8J595,L8ICN2,L8ICD6,L8I9I2,L8HND5,L8IH11,L8IRV6,L8IF42,L8I0B0,L8HYH0,L8I177,L8IGC3,L8IGV0,L8II73,L8IKX6,L8HQI2,L8I7V5
4	GO:0001666	response to hypoxia	P	26	L8J0U4,L8IZX3,L8HWY2,L8HXR1,L8IAA7,L8IX69,L8I177,L8J1K1,L8IGC3,L8HZ66,L8J4V3,L8J2E7,L8IJ79,L8I958,L8ICD6,L8I9I2,L8HND5,L8IDW8,L8IAM6,L8J3Q3,L8I793,L8INI7,L8IM29,L8IGL8,L8HQI2,L8IFL3
4	GO:0007584	response to nutrient	P	19	L8IU68,L8ICD7,L8IX69,L8I177,L8IGC3,L8J274,L8J1B9,L8IED3,L8I8M2,L8ICD6,L8I3R4,L8HND5,L8HQ26,L8II73,L8IRV6,L8IKX6,L8HQI2,L8I0B0,L8IFL3
4	GO:0019661	glucose catabolic process to lactate via pyruvate	P	1	L8ICD6
4	GO:0031668	cellular response to extracellular stimulus	P	13	L8I491,L8IFC2,L8IX69,L8J274,L8IGC3,L8IR50,L8IX54,L8IXI6,L8ICN2,L8ICD6,L8HQ26,L8IFL3,L8I0B0
4	GO:0001543	ovarian follicle rupture	P	1	L8HX06
4	GO:0001974	blood vessel remodeling	P	7	L8IXI6,L8HMB1,L8J1K1,L8HX06,L8J3Q3,L8IVA1,L8INI7
4	GO:0002027	regulation of heart rate	P	3	L8HXR1,L8HX06,L8IVA1
4	GO:0007565	female pregnancy	P	2	L8I491,L8HX06
4	GO:0009409	response to cold	P	1	L8HX06
4	GO:0014873	response to muscle activity involved in regulation of muscle adaptation	P	1	L8HX06
4	GO:0007597	blood coagulation, intrinsic pathway	P	1	L8IX25
4	GO:0006810	transport	P	139	L8IQQ6,L8IX25,L8IT79,L8IH78,L8J0I1,L8IHA9,L8IY30,L8HX22,L8J052,L8HXK3,L8IB26,L8IIM5,L8I6V6,L8I7C0,L8IT90,L8IJN1,L8IG34,L8I7Z4,L8HVY9,L8J1H5,L8J0P6,L8IIF1,L8IUT9,L8IGX7,L8I9A3,L8IIM8,L8IX54,L8IEH4,L8I9K6,L8IJ35,L8IB79,L8HPM7,L8HQ26,L8IBZ3,L8I491,L8IK42,L8J0U4,L8IYJ5,L8ICD7,L8J197,L8HXM6,L8IAC6,L8IK78,L8I9E0,L8J5Y3,L8IWJ4,L8IXI6,L8IKN2,L8IHQ3,L8J1T9,L8HND5,L8IH11,L8HQR6,L8I0B0,L8I2U1,L8IQ63,L8IAA7,…
4	GO:0034383	low-density lipoprotein particle clearance	P	4	L8IX69,L8HQI2,L8I3L2,L8IKX5
4	GO:0045299	otolith mineralization	P	1	L8HQI2
4	GO:0097009	energy homeostasis	P	2	L8HQI2,L8J3Q3
4	GO:0040008	regulation of growth	P	36	L8HW49,L8IYJ5,L8HW13,L8HXR1,L8I6Z9,L8J121,L8I6G2,L8IVA1,L8J634,L8IK78,L8IXI6,L8IJ79,L8ITU9,L8I9I2,L8J1T9,L8IS72,L8J3Q3,L8I793,L8HVI0,L8IQM1,L8IGL8,L8IQ44,L8J067,L8J224,L8IUT9,L8I4L3,L8HNU2,L8IDK7,L8I0I4,L8IDK5,L8IWC2,L8HX06,L8IWP2,L8INI7,L8IM29,L8HX98
4	GO:0010260	animal organ senescence	P	1	L8IDW8
4	GO:0022417	protein maturation by protein folding	P	1	L8IDW8
4	GO:0030968	endoplasmic reticulum unfolded protein response	P	2	L8HW02,L8IDW8
4	GO:0034975	protein folding in endoplasmic reticulum	P	1	L8IDW8
4	GO:0045454	cell redox homeostasis	P	2	L8IFC2,L8IDW8
4	GO:0008211	glucocorticoid metabolic process	P	2	L8II73,L8ILP2
4	GO:0030282	bone mineralization	P	1	L8HPA3
4	GO:0035905	ascending aorta development	P	1	L8HPA3
4	GO:0035906	descending aorta development	P	1	L8HPA3
4	GO:0048513	animal organ development	P	70	L8HMB1,L8IQQ6,L8I798,L8IX69,L8I1N5,L8HXK3,L8IG16,L8J1B9,L8IIM5,L8J595,L8I8M2,L8IT90,L8ICD6,L8IUY7,L8J3Q3,L8IGL8,L8IQ44,L8IUT9,L8J2M2,L8J4V3,L8I9K6,L8HQ26,L8IWC2,L8IWP2,L8IKX6,L8INI7,L8IM29,L8J0U4,L8HW49,L8IYJ5,L8IUT8,L8INB2,L8J197,L8I6Z9,L8HXM6,L8IC85,L8I6G2,L8IVA1,L8IHJ7,L8IK78,L8IWJ4,L8IXI6,L8J1X3,L8IIL2,L8II96,L8IKN2,L8ITU9,L8HUD1,L8I9I2,L8HND5,L8IE45,L8IS72,L8I793,L8HVI0,L8IHP9,L8IFL3,L8IQ63,…
4	GO:0044342	type B pancreatic cell proliferation	P	3	L8HVI0,L8IU68,L8IYJ5
4	GO:0001756	somitogenesis	P	2	L8IVA1,L8I793
4	GO:0007050	cell cycle arrest	P	2	L8IK78,L8I793
4	GO:0023019	signal transduction involved in regulation of gene expression	P	2	L8I7V5,L8I793
4	GO:0035019	somatic stem cell population maintenance	P	1	L8I793
4	GO:0035556	intracellular signal transduction	P	29	L8IUT8,L8J224,L8HPA3,L8HYH0,L8IUT9,L8J121,L8IMS7,L8HW79,L8IGC3,L8J274,L8IGX7,L8I4L3,L8I9E0,L8HNI0,L8IAH1,L8HWB6,L8IXI6,L8IJ79,L8I6V6,L8IKN2,L8I3R4,L8HMZ8,L8I9I2,L8J1B1,L8HQN3,L8IDW8,L8HX06,L8IRV6,L8I793
4	GO:0045165	cell fate commitment	P	4	L8IJ79,L8J3Q3,L8I793,L8IK78
4	GO:0051098	regulation of binding	P	17	L8HXR1,L8J224,L8HXM6,L8HPA3,L8IIF1,L8IGC3,L8I4L3,L8HNU2,L8I9E0,L8J5Y3,L8IR50,L8IIM8,L8IJS0,L8I793,L8INI7,L8IGL8,L8HQI2
4	GO:0045124	regulation of bone resorption	P	1	L8J274
4	GO:0097411	hypoxia-inducible factor-1alpha signaling pathway	P	1	L8J274
4	GO:0046685	response to arsenic-containing substance	P	3	L8HND5,L8IZ21,L8IGC3
4	GO:0060041	retina development in camera-type eye	P	4	L8IXI6,L8HXK3,L8IUT9,L8IZ21
4	GO:0002931	response to ischemia	P	4	L8IWP2,L8HWY2,L8HXR1,L8IS69
4	GO:0007186	G protein-coupled receptor signaling pathway	P	18	L8HXR1,L8I463,L8I4L3,L8I7A3,L8HXK3,L8I9E0,L8IWR9,L8IXI6,L8IPF6,L8IJ79,L8IHQ3,L8J1B1,L8IGV0,L8HX06,L8ICI6,L8IV54,L8IQ44,L8I7V5
4	GO:0035176	social behavior	P	1	L8I7A3
4	GO:0060137	maternal process involved in parturition	P	1	L8I7A3
4	GO:0098696	regulation of neurotransmitter receptor localization to postsynaptic specialization membrane	P	2	L8I7A3,L8HZL7
4	GO:0009725	response to hormone	P	51	L8IUT8,L8HW49,L8IYJ5,L8IQQ6,L8I3L2,L8ICD7,L8HP51,L8HXR1,L8HWY2,L8I798,L8IX69,L8I6G2,L8I1N5,L8IK78,L8IFV7,L8IJ79,L8IED3,L8I8M2,L8II96,L8HK61,L8IJX9,L8I9I2,L8IJN1,L8HND5,L8IH11,L8HVI0,L8HQI2,L8IFL3,L8J224,L8IXW8,L8HPA3,L8I177,L8J1K1,L8IWR9,L8INI7,L8J4V3,L8IDK5,L8IZ21,L8I3S5,L8IPN7,L8IGV0,L8HQ26,L8II73,L8HX06,L8IKX6,L8IWP2,L8IVX7,L8IY25,L8IM29,L8IU59,L8I7V5
4	GO:0021766	hippocampus development	P	3	L8J224,L8IHZ4,L8IQQ6
4	GO:0006754	ATP biosynthetic process	P	1	L8J0U4
4	GO:0009408	response to heat	P	3	L8J0U4,L8IM79,L8IGC3
4	GO:0016477	cell migration	P	30	L8IYJ5,L8I3L2,L8I2E4,L8IBA7,L8IVA1,L8HXK3,L8IG16,L8IK78,L8IXI6,L8IJ79,L8I958,L8J1B1,L8HVI0,L8IJW9,L8IF42,L8IFL3,L8IM79,L8J224,L8IAA7,L8HPA3,L8HZL7,L8HPT2,L8IUT9,L8IPF6,L8J0L1,L8IWP2,L8IBZ3,L8INI7,L8IM29,L8I7V5
4	GO:0051607	defense response to virus	P	3	L8HMZ8,L8IIM8,L8IUY4
4	GO:0072593	reactive oxygen species metabolic process	P	7	L8IYJ5,L8I6J8,L8HMZ8,L8J1K1,L8HVI0,L8J188,L8HT60
4	GO:0050793	regulation of developmental process	P	93	L8HMB1,L8IQQ6,L8IHA9,L8J052,L8HXK3,L8IG16,L8IFV7,L8J595,L8I6V6,L8I958,L8IKT6,L8J351,L8IB09,L8IQ44,L8J224,L8IUT9,L8IGX7,L8J2M2,L8HNU2,L8HQ26,L8IM29,L8INB2,L8J0U4,L8IYJ5,L8HXM6,L8J1S2,L8I6G2,L8IK78,L8I9E0,L8HZ66,L8IXI6,L8HRK0,L8ICN2,L8J1T9,L8HND5,L8IV54,L8IAA7,L8HZL7,L8I177,L8IGC3,L8I4L3,L8IWR9,L8I3S5,L8HQI2,L8IU59,L8I7V5,L8HXR1,L8HWY2,L8IX69,L8J121,L8I463,L8J1B9,L8IED3,L8J1B1,L8IRV6,L8J3Q3,L8I018,…
4	GO:1901700	response to oxygen-containing compound	P	74	L8IFC2,L8HXR1,L8HWY2,L8I798,L8IX69,L8IGK5,L8J274,L8I1N5,L8IIM5,L8IFV7,L8I958,L8J595,L8I8M2,L8IED3,L8ICD6,L8HK61,L8IUY7,L8IRV6,L8J3Q3,L8IF42,L8IGL8,L8J224,L8IXW8,L8IUT9,L8J4V3,L8IPN7,L8IFJ0,L8HQ26,L8IWP2,L8IKX6,L8HV64,L8INI7,L8J0U4,L8IUT8,L8IYJ5,L8HX98,L8I3L2,L8ICD7,L8I6G2,L8IK78,L8IR50,L8IXI6,L8IJ79,L8IIL2,L8ICN2,L8II96,L8I9I2,L8HND5,L8IH11,L8IA65,L8HSM4,L8I793,L8HVI0,L8IFL3,L8I0B0,L8I966,L8I177,…
4	GO:0001525	angiogenesis	P	10	L8IYJ5,L8IK78,L8INI7,L8HXR1,L8IAA7,L8IAM6,L8HXK3,L8IM29,L8IGL8,L8I7V5
4	GO:0019915	lipid storage	P	2	L8IBA7,L8HXR1
4	GO:0031295	T cell costimulation	P	1	L8HXR1
4	GO:0060056	mammary gland involution	P	2	L8I177,L8HXR1
4	GO:0000212	meiotic spindle organization	P	1	L8HXK3
4	GO:0003279	cardiac septum development	P	2	L8HXK3,L8IYJ5
4	GO:0021592	fourth ventricle development	P	1	L8HXK3
4	GO:0021670	lateral ventricle development	P	1	L8HXK3
4	GO:0021678	third ventricle development	P	1	L8HXK3
4	GO:0021680	cerebellar Purkinje cell layer development	P	1	L8HXK3
4	GO:0030048	actin filament-based movement	P	1	L8HXK3
4	GO:0030220	platelet formation	P	1	L8HXK3
4	GO:0042699	follicle-stimulating hormone signaling pathway	P	1	L8HXK3
4	GO:0051295	establishment of meiotic spindle localization	P	1	L8HXK3
4	GO:0098609	cell-cell adhesion	P	15	L8IYJ5,L8J224,L8I798,L8HZL7,L8IGL8,L8HXK3,L8IG16,L8IXI6,L8IFV7,L8HUD1,L8IFJ0,L8HVI0,L8IF42,L8IHP9,L8IIZ9
4	GO:0006099	tricarboxylic acid cycle	P	1	L8IKX5
4	GO:0006325	chromatin organization	P	8	L8IJS0,L8ITU9,L8IMB9,L8IAA7,L8IXW8,L8ICJ2,L8IS72,L8IJG9
4	GO:0098869	cellular oxidant detoxification	P	4	L8J1K1,L8IPN7,L8I9E0,L8HT60
4	GO:0006629	lipid metabolic process	P	49	L8HXR1,L8IHA9,L8IY30,L8HSH3,L8HX22,L8J1B9,L8IKD7,L8I958,L8IT90,L8IJX9,L8IJN1,L8IUY7,L8IUU5,L8I018,L8IM79,L8J0P6,L8IXW8,L8I2P8,L8IUY4,L8HWB6,L8HZ02,L8IKX6,L8IBZ3,L8I2V5,L8I3L2,L8J197,L8ILP2,L8IBA7,L8I9E0,L8J1X3,L8IHQ3,L8HQI2,L8IJ81,L8I662,L8HW02,L8IPA4,L8HZL7,L8IGC3,L8I4L3,L8IKX5,L8HXP8,L8I0I4,L8IDK5,L8HWS9,L8HTX7,L8II73,L8ICI6,L8HX98,L8I7V5
4	GO:0000278	mitotic cell cycle	P	2	L8IE51,L8I463
4	GO:0007341	penetration of zona pellucida	P	1	L8IBA7
4	GO:0006935	chemotaxis	P	15	L8IYJ5,L8J224,L8HPA3,L8IIF1,L8IVA1,L8I4L3,L8IPF6,L8IJ79,L8HUD1,L8J1B1,L8IAM6,L8HVI0,L8INI7,L8IFL3,L8I7V5
4	GO:0060742	epithelial cell differentiation involved in prostate gland development	P	2	L8IIF1,L8IK78
4	GO:0022900	electron transport chain	P	3	L8I7C0,L8I3R4,L8IFC2
4	GO:0060021	roof of mouth development	P	5	L8I793,L8INI7,L8I3R4,L8IAA7,L8I7V5
4	GO:0060325	face morphogenesis	P	3	L8IQ63,L8I3R4,L8I7V5
4	GO:0006884	cell volume homeostasis	P	1	L8HRD1
4	GO:0022615	protein to membrane docking	P	1	L8HWB6
4	GO:0009635	response to herbicide	P	2	L8I177,L8II73
4	GO:0018894	dibenzo-p-dioxin metabolic process	P	1	L8II73
4	GO:0001887	selenium compound metabolic process	P	1	L8I3S5
4	GO:0035902	response to immobilization stress	P	1	L8I3S5
4	GO:0005975	carbohydrate metabolic process	P	19	L8J0U4,L8IUT8,L8HVY9,L8I2E4,L8IZX3,L8HWY2,L8J0P6,L8IBA7,L8IC85,L8HXP8,L8HZ66,L8J1B9,L8IIL2,L8ICD6,L8HZ02,L8IUU5,L8I8E6,L8HV64,L8I2V5
4	GO:0034440	lipid oxidation	P	4	L8IUU5,L8HWS9,L8IBZ3,L8HQI2
4	GO:0001568	blood vessel development	P	9	L8INB2,L8IIM5,L8IYJ5,L8J1X3,L8J1K1,L8IWC2,L8HVI0,L8IK78,L8HXK3
4	GO:0010273	detoxification of copper ion	P	1	L8J1K1
4	GO:0019730	antimicrobial humoral response	P	5	L8J1K1,L8HPM7,L8I4L3,L8IMB9,L8I798
4	GO:0031069	hair follicle morphogenesis	P	3	L8J2M2,L8J1K1,L8IK78
4	GO:0048286	lung alveolus development	P	1	L8J1K1
4	GO:0051208	sequestering of calcium ion	P	1	L8J1K1
4	GO:0002537	nitric oxide production involved in inflammatory response	P	2	L8J188,L8I6J8
4	GO:0042168	heme metabolic process	P	3	L8IUU5,L8HVY9,L8IGC3
4	GO:0001913	T cell mediated cytotoxicity	P	1	L8IHP9
4	GO:0009826	unidimensional cell growth	P	1	L8IHP9
4	GO:0030154	cell differentiation	P	56	L8J0U4,L8HW49,L8IYJ5,L8IFC2,L8HXR1,L8J197,L8IY30,L8IMS7,L8HX22,L8IHJ7,L8I1N5,L8IK78,L8HXK3,L8IVA1,L8HZ66,L8HRD1,L8J2E7,L8IXI6,L8IFV7,L8IJ79,L8HUD1,L8IJN1,L8IUY7,L8IUU5,L8IH11,L8IE45,L8IDW8,L8J3Q3,L8I793,L8ICV2,L8HQI2,L8IGL8,L8IHP9,L8IFL3,L8IB09,L8IZX3,L8HW02,L8HPA3,L8HZL7,L8IIF1,L8I109,L8IUT9,L8J1K1,L8IWR9,L8HNI0,L8J2M2,L8I3Z2,L8J4V3,L8J0L1,L8HQN3,L8HX06,L8IWP2,L8INI7,L8IM29,L8IS69,L8I7V5
4	GO:0002088	lens development in camera-type eye	P	2	L8IWP2,L8I9I2
4	GO:0010259	multicellular organism aging	P	2	L8IM79,L8I9I2
4	GO:0051239	regulation of multicellular organismal process	P	115	L8HMB1,L8IQQ6,L8IX25,L8J0I1,L8IHA9,L8J274,L8J052,L8IG16,L8IFV7,L8J595,L8I6V6,L8I8M2,L8I958,L8IKT6,L8IJN1,L8IUY7,L8J351,L8IBF2,L8IB09,L8IQ44,L8J224,L8IIF1,L8IUT9,L8IGX7,L8J2M2,L8HNU2,L8IP29,L8HQ26,L8IM29,L8INB2,L8IYJ5,L8HXM6,L8I6Z9,L8IK78,L8I9E0,L8IR50,L8HZ66,L8IXI6,L8HRK0,L8ICN2,L8IHQ3,L8J1T9,L8HND5,L8IV54,L8I0B0,L8IAA7,L8HZL7,L8I177,L8IGC3,L8I4L3,L8IWR9,L8IPF6,L8I3S5,L8HTX7,L8I3R4,L8IVX7,L8IU59,…
4	GO:0035633	maintenance of permeability of blood-brain barrier	P	1	L8HND5
4	GO:0061843	Sertoli cell barrier remodeling	P	1	L8HND5
4	GO:0007338	single fertilization	P	2	L8IFV7,L8IBF6
4	GO:0006914	autophagy	P	10	L8IX54,L8HRK0,L8I944,L8IM79,L8IUR0,L8IR50,L8IMS7,L8IAB5,L8IS69,L8HWB6
4	GO:0001942	hair follicle development	P	1	L8J1X3
4	GO:0009887	animal organ morphogenesis	P	14	L8IUT8,L8IWR9,L8HNI0,L8J2M2,L8IJ79,L8J595,L8IIL2,L8HSA3,L8IWC2,L8J3Q3,L8I793,L8IM29,L8IQ44,L8I7V5
4	GO:0009888	tissue development	P	29	L8IYJ5,L8HXR1,L8HXM6,L8IVA1,L8IK78,L8IIM5,L8IJ79,L8I958,L8IED3,L8IIL2,L8HUD1,L8IRV6,L8J3Q3,L8I793,L8HVI0,L8IGL8,L8IFL3,L8IQ44,L8J224,L8IAA7,L8HPA3,L8IIF1,L8I177,L8HNI0,L8IWP2,L8IAM6,L8IKX6,L8HQI2,L8I7V5
4	GO:0021549	cerebellum development	P	2	L8I1N5,L8IQ44
4	GO:0048598	embryonic morphogenesis	P	13	L8IUT8,L8HXM6,L8IK78,L8IIM5,L8HSA3,L8IWC2,L8IWP2,L8J3Q3,L8I793,L8HSM4,L8IM29,L8IQ44,L8I7V5
4	GO:0042756	drinking behavior	P	2	L8IGV0,L8HX06
4	GO:0046849	bone remodeling	P	2	L8IK78,L8IGV0
4	GO:0048069	eye pigmentation	P	1	L8J0I1
4	GO:0060323	head morphogenesis	P	1	L8J0I1
4	GO:0002418	immune response to tumor cell	P	1	L8IGL8
4	GO:0030574	collagen catabolic process	P	3	L8IKT6,L8IM29,L8IGL8
4	GO:0048518	positive regulation of biological process	P	160	L8HXL7,L8J052,L8HXK3,L8IFV7,L8I958,L8I8M2,L8IKT6,L8IJN1,L8IJW9,L8IBF2,L8IB09,L8IIF1,L8J2M2,L8HNU2,L8IIM8,L8IP29,L8IEH4,L8IFJ0,L8IB79,L8HV64,L8I6Z9,L8IK78,L8I9E0,L8IGB4,L8ITU9,L8IH11,L8IV54,L8I0B0,L8I2U1,L8IAA7,L8HYH0,L8I177,L8IGC3,L8I4L3,L8IWR9,L8I3Z2,L8I3S5,L8I3R4,L8J0L1,L8HQI2,L8I7V5,L8IFC2,L8HXR1,L8HWY2,L8J121,L8IMS7,L8IGK5,L8J026,L8I1N5,L8IED3,L8J3Q3,L8I018,L8IGL8,L8IF42,L8IUY4,L8I7A3,L8HYP7,…
4	GO:0003407	neural retina development	P	1	L8I0B0
4	GO:0042750	hibernation	P	1	L8IJN1
4	GO:0061024	membrane organization	P	21	L8IM79,L8HXR1,L8HWY2,L8IHA9,L8IPA4,L8I7Q8,L8HX22,L8IWR9,L8HXK3,L8HNU2,L8J4V3,L8HWB6,L8I0I4,L8IDK7,L8IJ79,L8IJN1,L8HL45,L8IT07,L8HND5,L8IVX7,L8I018
4	GO:0001935	endothelial cell proliferation	P	3	L8IM29,L8IAA7,L8I3L2
4	GO:0044691	tooth eruption	P	1	L8HQ26
4	GO:0060135	maternal process involved in female pregnancy	P	2	L8I177,L8IGD5
4	GO:0007276	gamete generation	P	19	L8HP51,L8I1W1,L8IXW8,L8IBA7,L8IIF1,L8IC85,L8J2M2,L8IK78,L8J4V3,L8IJS0,L8IDK5,L8IXI6,L8IHP9,L8I8E6,L8IAM6,L8J3Q3,L8IWP2,L8HUH1,L8IFL3
4	GO:0003016	respiratory system process	P	2	L8IKN2,L8J3Q3
4	GO:0006904	vesicle docking involved in exocytosis	P	2	L8IKN2,L8IVX7
4	GO:0016188	synaptic vesicle maturation	P	2	L8IKN2,L8J1H5
4	GO:0051602	response to electrical stimulus	P	2	L8IKN2,L8I1N5
4	GO:0006119	oxidative phosphorylation	P	1	L8IAH1
4	GO:0007618	mating	P	1	L8IM79
4	GO:0030036	actin cytoskeleton organization	P	11	L8IJ79,L8IM79,L8HW13,L8I018,L8HLW7,L8IHA9,L8J0L1,L8J121,L8HNU2,L8HXK3,L8I7V5
4	GO:0044255	cellular lipid metabolic process	P	39	L8I3L2,L8HXR1,L8IHA9,L8J197,L8IY30,L8IBA7,L8HSH3,L8HX22,L8J1B9,L8I958,L8IHQ3,L8IJX9,L8IJN1,L8IUY7,L8IUU5,L8I018,L8IJ81,L8IM79,L8I662,L8IPA4,L8J0P6,L8IXW8,L8HZL7,L8I2P8,L8IUY4,L8IGC3,L8IKX5,L8HXP8,L8I0I4,L8IDK5,L8HWS9,L8HTX7,L8HZ02,L8II73,L8IKX6,L8IBZ3,L8I2V5,L8HQI2,L8I7V5
4	GO:0042391	regulation of membrane potential	P	11	L8HW49,L8IFC2,L8IN10,L8IM79,L8HXR1,L8HMZ8,L8IUT9,L8HX06,L8IWP2,L8I4L3,L8IFL3
4	GO:0009620	response to fungus	P	4	L8HPM7,L8I4L3,L8HNI0,L8IF42
4	GO:0016082	synaptic vesicle priming	P	1	L8IVX7
4	GO:0070254	mucus secretion	P	1	L8IVX7
4	GO:0009611	response to wounding	P	12	L8I870,L8I3L2,L8HPA3,L8I177,L8IGC3,L8IWR9,L8I958,L8IIL2,L8J3Q3,L8INI7,L8I0B0,L8I7V5
4	GO:0031223	auditory behavior	P	1	L8I870
4	GO:0043062	extracellular structure organization	P	34	L8IUT8,L8INB2,L8I3L2,L8HP51,L8HXR1,L8IHA9,L8HXK3,L8I9E0,L8J595,L8IHQ3,L8IKT6,L8IJX9,L8IDW8,L8IRV6,L8HSM4,L8I018,L8J2N7,L8IGL8,L8IM79,L8IQ63,L8IAA7,L8HPA3,L8J1K1,L8IUT9,L8I4L3,L8HWS9,L8HTX7,L8IIG2,L8IWC2,L8HX06,L8HQ26,L8INI7,L8IM29,L8I7V5
4	GO:0048757	pigment granule maturation	P	1	L8J026
4	GO:0007051	spindle organization	P	3	L8HXK3,L8IJ79,L8I463
4	GO:0008542	visual learning	P	2	L8I463,L8I4L3
4	GO:0001892	embryonic placenta development	P	1	L8IIM5
4	GO:0051298	centrosome duplication	P	1	L8IIM5
4	GO:0060674	placenta blood vessel development	P	5	L8IIM5,L8IYJ5,L8J1X3,L8HVI0,L8IK78
4	GO:0010469	regulation of signaling receptor activity	P	5	L8IAM6,L8I4L3,L8IWR9,L8HXR1,L8IV54
4	GO:0055093	response to hyperoxia	P	3	L8HXR1,L8IAM6,L8I7V5
4	GO:0070997	neuron death	P	1	L8IAM6
4	GO:0006959	humoral immune response	P	8	L8IX25,L8I2U1,L8IMB9,L8I798,L8J1K1,L8HPM7,L8I4L3,L8IK78
4	GO:0001553	luteinization	P	1	L8I7V5
4	GO:0033327	Leydig cell differentiation	P	1	L8I7V5
4	GO:0034405	response to fluid shear stress	P	6	L8IIM5,L8IFV7,L8HSX9,L8IWP2,L8IAM6,L8I7V5
4	GO:0048839	inner ear development	P	2	L8IKD7,L8I7V5
4	GO:0060437	lung growth	P	1	L8I7V5
4	GO:0060749	mammary gland alveolus development	P	1	L8IUT9
4	GO:0042752	regulation of circadian rhythm	P	1	L8I1N5
4	GO:0007548	sex differentiation	P	1	L8IIL2
4	GO:0009790	embryo development	P	11	L8J1K1,L8IK78,L8HXK3,L8I3S5,L8IIL2,L8II96,L8HSA3,L8IWP2,L8J3Q3,L8I793,L8I7V5
4	GO:0048608	reproductive structure development	P	16	L8IYJ5,L8J2M2,L8IDK5,L8IXI6,L8J1X3,L8IIL2,L8I9K6,L8HND5,L8II73,L8IWP2,L8J3Q3,L8IKX6,L8HVI0,L8IM29,L8IGL8,L8I7V5
4	GO:0043366	beta selection	P	1	L8IJ79
4	GO:0043931	ossification involved in bone maturation	P	1	L8IJ79
4	GO:0061383	trabecula morphogenesis	P	2	L8IK78,L8IJ79
4	GO:0032964	collagen biosynthetic process	P	1	L8I177
4	GO:0001708	cell fate specification	P	2	L8IK78,L8J3Q3
4	GO:0001709	cell fate determination	P	2	L8IK78,L8J3Q3
4	GO:0002437	inflammatory response to antigenic stimulus	P	3	L8IU68,L8I8M2,L8IK78
4	GO:0003151	outflow tract morphogenesis	P	2	L8IK78,L8INI7
4	GO:0003160	endocardium morphogenesis	P	1	L8IK78
4	GO:0007440	foregut morphogenesis	P	1	L8IK78
4	GO:0030900	forebrain development	P	2	L8IK78,L8I4L3
4	GO:0035148	tube formation	P	3	L8I958,L8HSM4,L8IK78
4	GO:0060740	prostate gland epithelium morphogenesis	P	1	L8IK78
4	GO:0061073	ciliary body morphogenesis	P	2	L8IK78,L8J3Q3
4	GO:0097150	neuronal stem cell population maintenance	P	2	L8IK78,L8J3Q3
4	GO:1990705	cholangiocyte proliferation	P	1	L8IK78
4	GO:0010842	retina layer formation	P	1	L8IG16
4	GO:0035295	tube development	P	13	L8IIM5,L8I958,L8J595,L8HUH1,L8HXM6,L8I177,L8IWP2,L8IKX6,L8I793,L8IVA1,L8IK78,L8IG16,L8J3Q3
4	GO:0048729	tissue morphogenesis	P	14	L8J224,L8HXM6,L8IUT9,L8IVA1,L8IK78,L8IG16,L8IIM5,L8IJ79,L8I5C0,L8IWP2,L8J3Q3,L8I793,L8INI7,L8IM29
4	GO:0040016	embryonic cleavage	P	1	L8ICI6
4	GO:0061792	secretory granule maturation	P	1	L8IDK7
4	GO:0032940	secretion by cell	P	60	L8IQQ6,L8IX25,L8IH78,L8J0I1,L8IMS7,L8J052,L8HXK3,L8IED3,L8I6V6,L8I284,L8J1B1,L8IRV6,L8IU59,L8IF42,L8J0P6,L8IIF1,L8IDE2,L8IUT9,L8IGX7,L8HWB6,L8HRM3,L8IEH4,L8HZ02,L8HPM7,L8I8E6,L8IK42,L8J0U4,L8I491,L8I870,L8IYJ5,L8IN10,L8HP51,L8J197,L8IBA7,L8IAC6,L8IK78,L8IXI6,L8IBF6,L8IKN2,L8I493,L8IE45,L8I793,L8HVI0,L8J2N7,L8HQR6,L8I0B0,L8I612,L8IQ63,L8I177,L8I4L3,L8IDK7,L8IHV8,L8J332,L8I0I4,L8HRT7,L8IAM6,L8IVX7,…
4	GO:0034101	erythrocyte homeostasis	P	2	L8IXI6,L8IGC3
4	GO:0048469	cell maturation	P	4	L8IXI6,L8IWP2,L8I4L3,L8IWR9
4	GO:0070050	neuron cellular homeostasis	P	3	L8IXI6,L8HZM0,L8IGV0
4	GO:0097350	neutrophil clearance	P	1	L8IXI6
4	GO:0009266	response to temperature stimulus	P	7	L8J0U4,L8IFC2,L8IM79,L8IGV0,L8HX06,L8IKX6,L8IGC3
4	GO:0048755	branching morphogenesis of a nerve	P	1	L8J224
4	GO:0090102	cochlea development	P	1	L8J224
4	GO:0007166	cell surface receptor signaling pathway	P	58	L8IQQ6,L8IX69,L8I463,L8IMS7,L8J274,L8HX22,L8I1N5,L8IIM5,L8J1B9,L8IFV7,L8J595,L8I958,L8HMZ8,L8J1B1,L8J3Q3,L8I018,L8IBF2,L8IGL8,L8IB09,L8J224,L8IIF1,L8IUT9,L8IAH1,L8I7A3,L8HNI0,L8IIM8,L8J4V3,L8IX54,L8IIG2,L8IB79,L8HQ26,L8IWC2,L8I8E6,L8IS69,L8IYJ5,L8I3L2,L8I6Z9,L8IVA1,L8IK78,L8J634,L8IXI6,L8IJ79,L8J1X3,L8HUD1,L8IA65,L8IH11,L8IE45,L8I793,L8HVI0,L8IFL3,L8I0B0,L8IIZ9,L8HZL7,L8I4L3,L8IWR9,L8IPF6,L8IU59,…
4	GO:0061635	regulation of protein complex stability	P	1	L8IS69
4	GO:0001824	blastocyst development	P	1	L8INI7
4	GO:0003272	endocardial cushion formation	P	1	L8INI7
4	GO:0030155	regulation of cell adhesion	P	33	L8IYJ5,L8HXR1,L8I798,L8J052,L8HXK3,L8IK78,L8J1B9,L8IFV7,L8IJ79,L8I958,L8I6V6,L8IIL2,L8IRV6,L8J3Q3,L8I793,L8HSM4,L8J2N7,L8IGL8,L8IFL3,L8J224,L8IAA7,L8I177,L8IUT9,L8I109,L8IGX7,L8HNI0,L8J2M2,L8HYP7,L8IIG2,L8IAM6,L8INI7,L8IM29,L8HQI2
4	GO:0061032	visceral serous pericardium development	P	1	L8INI7
4	GO:0008217	regulation of blood pressure	P	9	L8IJ79,L8HRW8,L8HX06,L8IGC3,L8I793,L8J3Q3,L8INI7,L8J2N7,L8HQI2
4	GO:0021688	cerebellar molecular layer formation	P	1	L8J3Q3
4	GO:0021693	cerebellar Purkinje cell layer structural organization	P	1	L8J3Q3
4	GO:0045061	thymic T cell selection	P	1	L8J3Q3
4	GO:0060042	retina morphogenesis in camera-type eye	P	1	L8J3Q3
4	GO:0060411	cardiac septum morphogenesis	P	4	L8IYJ5,L8J3Q3,L8IVA1,L8IK78
4	GO:0006725	cellular aromatic compound metabolic process	P	42	L8IFC2,L8HWY2,L8HSH3,L8I1N5,L8IJS0,L8I6V6,L8ICD6,L8HRW8,L8IUU5,L8HVY9,L8IDJ1,L8I9H6,L8IGX7,L8I9A3,L8IJG9,L8IPN7,L8IGD5,L8IEB1,L8IB79,L8I8E6,L8HV64,L8IKX6,L8J0U4,L8IYJ5,L8IK78,L8HZ66,L8I944,L8IJ79,L8I793,L8HVI0,L8IZX3,L8IPA4,L8HPA3,L8HYH0,L8I966,L8J1K1,L8IGC3,L8I4L3,L8IWR9,L8HXP8,L8I0I4,L8II73
4	GO:0006788	heme oxidation	P	1	L8IGC3
4	GO:0021772	olfactory bulb development	P	1	L8IVA1
4	GO:0060174	limb bud formation	P	1	L8IVA1
4	GO:0010035	response to inorganic substance	P	39	L8IFC2,L8HXR1,L8I798,L8IGK5,L8I1N5,L8IR50,L8IIM5,L8IXI6,L8IFV7,L8IJ79,L8I958,L8J595,L8ICN2,L8ICD6,L8IJX9,L8I9I2,L8IJN1,L8IH11,L8IE45,L8IRV6,L8IF42,L8I0B0,L8J067,L8IAA7,L8I177,L8J1K1,L8HW79,L8IGC3,L8I4L3,L8IDK7,L8IZ21,L8I3S5,L8I3R4,L8IB79,L8II73,L8I8E6,L8IKX6,L8HX98,L8I7V5
4	GO:0051014	actin filament severing	P	1	L8IRV6
4	GO:0034447	very-low-density lipoprotein particle clearance	P	2	L8I9E0,L8IX69
4	GO:0035641	locomotory exploration behavior	P	1	L8I9E0
4	GO:0061771	response to caloric restriction	P	2	L8I9E0,L8IX69
4	GO:0021517	ventral spinal cord development	P	1	L8IX69
4	GO:0150094	amyloid-beta clearance by cellular catabolic process	P	1	L8IX69
4	GO:0048519	negative regulation of biological process	P	163	L8HXL7,L8J052,L8HXK3,L8I958,L8IKT6,L8IJN1,L8J351,L8IBF2,L8IB09,L8HN27,L8IIF1,L8J2M2,L8IIM8,L8IP29,L8IEH4,L8IFJ0,L8IB79,L8HPM7,L8HV64,L8IK42,L8I6Z9,L8IK78,L8I9E0,L8HRK0,L8IGB4,L8ITU9,L8IHQ3,L8IH11,L8HSM4,L8IV54,L8I0B0,L8IAA7,L8I177,L8IGC3,L8I4L3,L8IWR9,L8I3S5,L8I3R4,L8HQI2,L8IQM1,L8I7V5,L8IU59,L8HXR1,L8HWY2,L8J121,L8J026,L8IGK5,L8I1N5,L8IED3,L8HMZ8,L8J3Q3,L8I018,L8IF42,L8IGL8,L8IU68,L8IDJ1,L8IAH1,…
4	GO:0034059	response to anoxia	P	2	L8HVI0,L8IYJ5
4	GO:0000226	microtubule cytoskeleton organization	P	8	L8IX54,L8IJ79,L8HXR1,L8I9I2,L8I463,L8IWP2,L8HXK3,L8J4V3
4	GO:0048731	system development	P	21	L8I7Z4,L8I3L2,L8HW02,L8HP51,L8I6Z9,L8HSX9,L8IBA7,L8IUT9,L8IVA1,L8I7A3,L8HNI0,L8I9A3,L8J595,L8IED3,L8HVH0,L8HL45,L8HQ26,L8J3Q3,L8I793,L8I2V5,L8I7V5
4	GO:0001556	oocyte maturation	P	1	L8IWR9
4	GO:0007143	female meiotic nuclear division	P	1	L8IWR9
4	GO:0030728	ovulation	P	3	L8HQ26,L8IWR9,L8IT90
4	GO:0043616	keratinocyte proliferation	P	1	L8IWR9
4	GO:0042594	response to starvation	P	7	L8IX54,L8I491,L8ICN2,L8IX69,L8IKX6,L8J274,L8IR50
4	GO:0006952	defense response	P	38	L8IK42,L8IQQ6,L8HWY2,L8I798,L8IMS7,L8J052,L8IK78,L8J1B9,L8I958,L8I8M2,L8IGB4,L8HMZ8,L8IUY7,L8J2N7,L8IGL8,L8IFL3,L8I0B0,L8IB09,L8IF42,L8IQ44,L8IU68,L8HQR6,L8J224,L8IMB9,L8IAA7,L8I177,L8IUT9,L8IUY4,L8I4L3,L8IKX5,L8J5K4,L8IIM8,L8IPF6,L8HTX7,L8HQ26,L8HPM7,L8IWP2,L8IIU6
4	GO:0003294	atrial ventricular junction remodeling	P	1	L8IWP2
4	GO:0060156	milk ejection reflex	P	1	L8IWP2
4	GO:0009314	response to radiation	P	16	L8I870,L8I798,L8HYH0,L8IUT9,L8I463,L8IGK5,L8I4L3,L8IGX7,L8IJ79,L8I6V6,L8ICN2,L8I9I2,L8HND5,L8II73,L8IKX6,L8IFL3
4	GO:0050878	regulation of body fluid levels	P	24	L8IU68,L8I612,L8IX25,L8HWY2,L8HXR1,L8I798,L8HSX9,L8IIF1,L8J1K1,L8HX22,L8I7A3,L8IR50,L8I9E0,L8HWS9,L8IP29,L8II96,L8IUY7,L8HND5,L8IAM6,L8HSM4,L8IWP2,L8IVX7,L8IIU6,L8J2N7
4	GO:0060672	epithelial cell morphogenesis involved in placental branching	P	1	L8HSM4
4	GO:0060322	head development	P	1	L8IM29
4	GO:0097094	craniofacial suture morphogenesis	P	1	L8IM29
4	GO:1990834	response to odorant	P	1	L8IM29
4	GO:0001967	suckling behavior	P	1	L8I4L3
4	GO:0007617	mating behavior	P	2	L8IBA7,L8I4L3
4	GO:0016358	dendrite development	P	2	L8IFL3,L8I4L3
4	GO:0051124	synaptic growth at neuromuscular junction	P	1	L8I4L3
4	GO:0090647	modulation of age-related behavioral decline	P	1	L8I4L3
4	GO:0097190	apoptotic signaling pathway	P	11	L8HYH0,L8IGC3,L8J274,L8IGX7,L8IX54,L8I6V6,L8HMZ8,L8HQN3,L8IDW8,L8I793,L8IBF2
4	GO:0044091	membrane biogenesis	P	1	L8IUY4
4	GO:0043900	regulation of multi-organism process	P	36	L8IX25,L8HXR1,L8HXM6,L8J026,L8IK78,L8I9E0,L8IXI6,L8IBF6,L8II96,L8IKT6,L8HMZ8,L8IF42,L8IHP9,L8I0B0,L8IU68,L8HVY9,L8J0P6,L8I177,L8IGC3,L8IAH1,L8I4L3,L8HNI0,L8IWR9,L8IIM8,L8HWB6,L8IDK7,L8IGD5,L8HLW7,L8IFJ0,L8HZ02,L8IIG2,L8IB79,L8HPM7,L8IAM6,L8IWP2,L8HX98
4	GO:0033627	cell adhesion mediated by integrin	P	2	L8HVI0,L8IFV7
4	GO:0048659	smooth muscle cell proliferation	P	1	L8HVI0
4	GO:0002757	immune response-activating signal transduction	P	6	L8IKT6,L8IFJ0,L8IB79,L8HNI0,L8HX98,L8I0B0
4	GO:0002218	activation of innate immune response	P	6	L8IKT6,L8IFJ0,L8IB79,L8HNI0,L8HX98,L8I0B0
4	GO:0050794	regulation of cellular process	P	223	L8HXL7,L8J274,L8J052,L8HXK3,L8IFV7,L8I958,L8I8M2,L8IKT6,L8IJN1,L8J351,L8IJW9,L8IBF2,L8IB09,L8HN27,L8IIF1,L8J2M2,L8HNU2,L8IIM8,L8IX54,L8IP29,L8IEH4,L8IFJ0,L8IB79,L8HPM7,L8HV64,L8IK42,L8I6Z9,L8IHJ7,L8IK78,L8I9E0,L8HRK0,L8IGB4,L8ITU9,L8IHQ3,L8IH11,L8HSM4,L8IV54,L8I0B0,L8I2U1,L8HW02,L8IAA7,L8HYH0,L8I177,L8IGC3,L8I4L3,L8IWR9,L8J188,L8I3Z2,L8I3S5,L8I3R4,L8J0L1,L8HQI2,L8IQM1,L8I7V5,L8IU59,L8IFC2,L8HXR1,…
4	GO:0048583	regulation of response to stimulus	P	130	L8HMB1,L8HXL7,L8IX25,L8J0I1,L8J274,L8HX22,L8J052,L8HXK3,L8IIM5,L8IFV7,L8J595,L8I6V6,L8IKT6,L8IJN1,L8IG34,L8J351,L8IBF2,L8IB09,L8HVY9,L8J224,L8IIF1,L8IUT9,L8IGX7,L8J2M2,L8IIM8,L8IP29,L8IFJ0,L8IB79,L8HPM7,L8IM29,L8HW49,L8IYJ5,L8HXM6,L8I6G2,L8IHJ7,L8IK78,L8I9E0,L8J5Y3,L8IXI6,L8HRK0,L8IGB4,L8ICN2,L8IKN2,L8IHQ3,L8J1T9,L8HND5,L8IV54,L8I0B0,L8I2U1,L8I1W1,L8IPA4,L8IAA7,L8HZL7,L8I177,L8IGC3,L8I4L3,L8IWR9,…
4	GO:0002764	immune response-regulating signaling pathway	P	6	L8IKT6,L8IFJ0,L8IB79,L8HNI0,L8HX98,L8I0B0
4	GO:0019538	protein metabolic process	P	94	L8HMB1,L8HXL7,L8IX25,L8J0I1,L8J274,L8HX22,L8HXK3,L8IJS0,L8IFV7,L8I958,L8J595,L8IKT6,L8IT90,L8IBF2,L8HN01,L8HVY9,L8J1H5,L8IMB9,L8J0P6,L8IUT9,L8J2M2,L8I9A3,L8IP29,L8IFJ0,L8IB79,L8HQ26,L8IM29,L8INB2,L8IYJ5,L8IHJ7,L8IAC6,L8I9E0,L8HZ66,L8IXI6,L8I944,L8II96,L8IHQ3,L8ITU9,L8IKN2,L8J1T9,L8IH11,L8I0B0,L8HW02,L8IAA7,L8I4L3,L8I3Z2,L8I3S5,L8HTX7,L8I3R4,L8HVH0,L8IAB5,L8IU59,L8I7V5,L8HWY2,L8I798,L8IX69,L8IMS7,…
4	GO:0044260	cellular macromolecule metabolic process	P	82	L8HMB1,L8IFC2,L8HXL7,L8HWY2,L8HXR1,L8IX69,L8IMS7,L8IGK5,L8J274,L8HX22,L8I1N5,L8J1B9,L8IJS0,L8I958,L8IT90,L8HMZ8,L8IJX9,L8HVY9,L8IM79,L8J1H5,L8IMB9,L8IDJ1,L8J0P6,L8IUT9,L8I9H6,L8J2M2,L8I7A3,L8I9A3,L8IJG9,L8HYP7,L8HWB6,L8IGD5,L8HZ02,L8IFJ0,L8IB79,L8HQN3,L8IWC2,L8HV64,L8I2V5,L8IS69,L8INB2,L8IYJ5,L8IBA7,L8ICJ2,L8IAC6,L8I9E0,L8IXI6,L8I944,L8IGB4,L8II96,L8ITU9,L8IKN2,L8I9I2,L8J1T9,L8IH11,L8IS72,L8I793,…
4	GO:0043170	macromolecule metabolic process	P	113	L8HMB1,L8HXL7,L8IX25,L8IH78,L8J0I1,L8J274,L8HX22,L8HXK3,L8IJS0,L8IFV7,L8I958,L8J595,L8IKT6,L8IT90,L8IBF2,L8HN01,L8HVY9,L8J1H5,L8IMB9,L8J0P6,L8IUT9,L8J2M2,L8I9A3,L8IJG9,L8IP29,L8IEB1,L8IFJ0,L8IB79,L8HQ26,L8HV64,L8IM29,L8INB2,L8IK42,L8IYJ5,L8IHJ7,L8IAC6,L8IK78,L8I9E0,L8HZ66,L8IXI6,L8I944,L8IGB4,L8II96,L8IHQ3,L8ITU9,L8IKN2,L8J1T9,L8IH11,L8I0B0,L8HW02,L8IAA7,L8HYH0,L8HZL7,L8I4L3,L8IWR9,L8I3Z2,L8I3S5,…
4	GO:1901564	organonitrogen compound metabolic process	P	122	L8HMB1,L8HXL7,L8IX25,L8IH78,L8J0I1,L8J274,L8HX22,L8J052,L8HXK3,L8IJS0,L8IFV7,L8I958,L8J595,L8I6V6,L8IKT6,L8IT90,L8J0L8,L8IUU5,L8IBF2,L8HN01,L8HVY9,L8J1H5,L8IMB9,L8J0P6,L8IUT9,L8J2M2,L8IGX7,L8I9A3,L8IP29,L8IFJ0,L8IB79,L8HQ26,L8HV64,L8IM29,L8J0U4,L8INB2,L8IYJ5,L8IK42,L8J197,L8IHJ7,L8IAC6,L8I9E0,L8HZ66,L8IXI6,L8I944,L8II96,L8IHQ3,L8ITU9,L8IKN2,L8J1T9,L8IH11,L8IJ81,L8I0B0,L8HW02,L8IPA4,L8IAA7,L8HZL7,…
4	GO:0050877	nervous system process	P	26	L8I870,L8IN10,L8IX69,L8IBA7,L8I463,L8IGK5,L8HXK3,L8I9E0,L8IED3,L8IKN2,L8J3Q3,L8IFL3,L8I7Z4,L8IM79,L8ILQ8,L8HW02,L8I1W1,L8IUT9,L8I4L3,L8I7A3,L8IDK7,L8I0I4,L8IZ21,L8IT07,L8HX06,L8HX98
4	GO:0009268	response to pH	P	5	L8IIM5,L8IZ21,L8ICN2,L8IWP2,L8HX98
4	GO:0019222	regulation of metabolic process	P	162	L8J274,L8HXK3,L8IFV7,L8I958,L8IJN1,L8J351,L8IBF2,L8IB09,L8HN27,L8IIF1,L8J2M2,L8IP29,L8IEH4,L8IFJ0,L8IB79,L8HPM7,L8HV64,L8IK42,L8I6Z9,L8IK78,L8I9E0,L8HRK0,L8IGB4,L8ITU9,L8IHQ3,L8IH11,L8HSM4,L8IV54,L8I0B0,L8IAA7,L8HYH0,L8I177,L8IGC3,L8I4L3,L8IWR9,L8I3Z2,L8I3S5,L8I3R4,L8HQI2,L8IQM1,L8I7V5,L8IFC2,L8HXR1,L8HWY2,L8J121,L8IMS7,L8IGK5,L8I1N5,L8IED3,L8HMZ8,L8J3Q3,L8I018,L8IF42,L8IGL8,L8IU68,L8IDJ1,L8IAH1,…
4	GO:0048002	antigen processing and presentation of peptide antigen	P	8	L8J2L7,L8I2U1,L8I5C0,L8IHA9,L8IVX7,L8I018,L8HX98,L8HWB6
4	GO:0002504	antigen processing and presentation of peptide or polysaccharide antigen via MHC class II	P	6	L8J2L7,L8I5C0,L8IHA9,L8I018,L8HX98,L8HWB6
4	GO:0019884	antigen processing and presentation of exogenous antigen	P	6	L8I5C0,L8IHA9,L8IVX7,L8I018,L8HX98,L8HWB6
4	GO:1901575	organic substance catabolic process	P	58	L8HXL7,L8HWY2,L8IY30,L8IX69,L8IMS7,L8IGK5,L8I1N5,L8IJS0,L8I958,L8I6V6,L8ICD6,L8HRW8,L8IJX9,L8HMZ8,L8IJN1,L8IUU5,L8IU59,L8IM79,L8IDJ1,L8J0P6,L8I2P8,L8IGX7,L8I9A3,L8HYP7,L8HWB6,L8IGD5,L8I5C0,L8HZ02,L8IB79,L8I8E6,L8HV64,L8IKX6,L8IBZ3,L8IS69,L8J0U4,L8HX98,L8I3L2,L8J197,L8IBA7,L8IC85,L8I9E0,L8HZ66,L8IH11,L8IJ81,L8IZX3,L8ILQ8,L8HW02,L8I966,L8HZL7,L8I177,L8IGC3,L8IKX5,L8HXP8,L8I0I4,L8HWS9,L8I3S5,L8HTX7,…
4	GO:0044248	cellular catabolic process	P	50	L8HXL7,L8J197,L8IY30,L8IX69,L8IBA7,L8IC85,L8IMS7,L8I1N5,L8IR50,L8IJS0,L8HRK0,L8I944,L8I6V6,L8HRW8,L8IJX9,L8HMZ8,L8IJN1,L8IUU5,L8IH11,L8IU59,L8HQI2,L8IJ81,L8IM79,L8ILQ8,L8HW02,L8IDJ1,L8IS69,L8J0P6,L8I966,L8I177,L8I2P8,L8IGC3,L8IGX7,L8HXP8,L8HYP7,L8I0I4,L8HWB6,L8HT60,L8HWS9,L8IX54,L8IGD5,L8HTX7,L8HZ02,L8IUR0,L8IB79,L8HV64,L8IKX6,L8IBZ3,L8IAB5,L8HX98
4	GO:0070887	cellular response to chemical stimulus	P	73	L8IFC2,L8HXR1,L8HWY2,L8I798,L8IX69,L8HSX9,L8IGK5,L8J274,L8I1N5,L8HXK3,L8IIM5,L8IFV7,L8J595,L8IED3,L8I8M2,L8IJN1,L8IRV6,L8J3Q3,L8IGL8,L8IM79,L8J067,L8J224,L8IUT9,L8I9H6,L8IAH1,L8IIM8,L8J4V3,L8IPN7,L8HLW7,L8IFJ0,L8IB79,L8HQ26,L8IWP2,L8IKX6,L8IUT8,L8HX98,L8J197,L8I6G2,L8IHJ7,L8IR50,L8IK78,L8HZ66,L8IXI6,L8IJ79,L8ICN2,L8HND5,L8IDW8,L8IA65,L8HSM4,L8I793,L8IFL3,L8I0B0,L8IZX3,L8HPA3,L8I966,L8I177,L8J1K1,…
4	GO:1901615	organic hydroxy compound metabolic process	P	19	L8J0U4,L8I3L2,L8IM79,L8HWY2,L8J197,L8IY30,L8J1K1,L8I4L3,L8IKX5,L8HXP8,L8I9E0,L8J1X3,L8HTX7,L8ICD6,L8IJX9,L8II73,L8IBZ3,L8IJ81,L8HX98
4	GO:0006766	vitamin metabolic process	P	6	L8I6V6,L8IGX7,L8I966,L8IC85,L8J052,L8HX98
4	GO:1901360	organic cyclic compound metabolic process	P	55	L8IFC2,L8HWY2,L8I1N5,L8IJS0,L8I6V6,L8IT90,L8ICD6,L8HRW8,L8IJX9,L8IUU5,L8HVY9,L8IM79,L8IDJ1,L8I9H6,L8IGX7,L8I9A3,L8IJG9,L8IPN7,L8IGD5,L8IEB1,L8IB79,L8I8E6,L8HV64,L8IKX6,L8IBZ3,L8J0U4,L8IYJ5,L8I3L2,L8ILP2,L8IC85,L8IK78,L8I9E0,L8HZ66,L8J1X3,L8I944,L8IJ79,L8I793,L8HVI0,L8IZX3,L8IPA4,L8HPA3,L8HYH0,L8I966,L8J1K1,L8I177,L8IGC3,L8I4L3,L8IKX5,L8IWR9,L8HXP8,L8I0I4,L8HTX7,L8II73,L8HX98,L8I7V5
4	GO:0040012	regulation of locomotion	P	54	L8IQQ6,L8HXR1,L8I798,L8J121,L8HXK3,L8J1B9,L8IFV7,L8J595,L8I958,L8J3Q3,L8J351,L8IJW9,L8IGL8,L8J224,L8I109,L8IUT9,L8J4V3,L8IIG2,L8HQ26,L8IWC2,L8IWP2,L8I8E6,L8INI7,L8IM29,L8J0U4,L8INB2,L8IYJ5,L8I3L2,L8IC85,L8I6G2,L8IVA1,L8IK78,L8I9E0,L8IJ79,L8IIL2,L8HUD1,L8I493,L8HSM4,L8I793,L8HVI0,L8HQI2,L8IFL3,L8IIZ9,L8J1K1,L8IGC3,L8I4L3,L8IWR9,L8HWS9,L8IZ21,L8IPF6,L8HX06,L8IAM6,L8HX98,L8I7V5
4	GO:0032879	regulation of localization	P	100	L8IQQ6,L8IHA9,L8HXK3,L8IIM5,L8IFV7,L8J595,L8I958,L8I8M2,L8J351,L8IJW9,L8IBF2,L8IB09,L8J224,L8IUT9,L8J2M2,L8HNU2,L8IEH4,L8HPM7,L8HQ26,L8HV64,L8IM29,L8J0U4,L8INB2,L8IYJ5,L8HW49,L8I6G2,L8IK78,L8I9E0,L8IR50,L8IXI6,L8IKN2,L8IHQ3,L8HND5,L8HSM4,L8IJ81,L8I7Q8,L8HZL7,L8I177,L8HW79,L8IGC3,L8I4L3,L8IWR9,L8IPF6,L8HTX7,L8I3R4,L8IGV0,L8IVX7,L8HQI2,L8I7V5,L8IFC2,L8HWY2,L8HXR1,L8I798,L8J121,L8J026,L8IGK5,L8J1B9,…
4	GO:0030030	cell projection organization	P	22	L8IM79,L8IHA9,L8J224,L8IX69,L8J1K1,L8IUT9,L8IVA1,L8I4L3,L8HNU2,L8IK78,L8HXK3,L8IIM5,L8IJ79,L8HRT7,L8I958,L8IIL2,L8IKN2,L8IRV6,L8IWP2,L8I018,L8HX98,L8IFL3
4	GO:0099173	postsynapse organization	P	3	L8I018,L8IHA9,L8HX98
4	GO:0050790	regulation of catalytic activity	P	78	L8IX25,L8HRF0,L8IH78,L8IHA9,L8HXR1,L8HSX9,L8IX69,L8I463,L8I1N5,L8IIM5,L8IFV7,L8J595,L8IED3,L8I958,L8IM56,L8HRW8,L8HK61,L8HMZ8,L8IJN1,L8I018,L8IBF2,L8HN27,L8IU68,L8IM79,L8J224,L8HW35,L8IIF1,L8IUT9,L8I9H6,L8IUY4,L8I7A3,L8HNI0,L8IIM8,L8I5C0,L8IEH4,L8IIG2,L8INI7,L8IK42,L8IUT8,L8IYJ5,L8I3L2,L8ICD7,L8HP51,L8I6Z9,L8ILP2,L8IC85,L8IK78,L8I9E0,L8J5Y3,L8IJ79,L8II96,L8IHQ3,L8I9I2,L8IH11,L8HSM4,L8I793,L8HVI0,…
4	GO:0044093	positive regulation of molecular function	P	53	L8IFC2,L8IQQ6,L8HRF0,L8HXR1,L8IHA9,L8IX69,L8I463,L8I1N5,L8IIM5,L8IJS0,L8IFV7,L8J595,L8IED3,L8I958,L8I018,L8IBF2,L8IB09,L8J224,L8IIF1,L8IUT9,L8IUY4,L8I7A3,L8HNI0,L8HNU2,L8I5C0,L8IIG2,L8INI7,L8IUT8,L8HX98,L8IYJ5,L8I3L2,L8HP51,L8IC85,L8IR50,L8I9E0,L8IJ79,L8HND5,L8IH11,L8I793,L8HVI0,L8IJ81,L8IV54,L8I0B0,L8J1K1,L8HW79,L8I4L3,L8IWR9,L8IPF6,L8HTX7,L8I3R4,L8HX06,L8HQI2,L8I7V5
4	GO:0023051	regulation of signaling	P	108	L8HMB1,L8HXL7,L8IHA9,L8J0I1,L8J274,L8HX22,L8J052,L8HXK3,L8IIM5,L8IFV7,L8J595,L8IG34,L8J351,L8IBF2,L8IB09,L8HVY9,L8J224,L8IIF1,L8IUT9,L8J2M2,L8IIM8,L8IFJ0,L8HPM7,L8HV64,L8IM29,L8HW49,L8IYJ5,L8HXM6,L8I6G2,L8IK78,L8I9E0,L8J5Y3,L8IXI6,L8HRK0,L8IGB4,L8IKN2,L8IHQ3,L8J1T9,L8IV54,L8I0B0,L8I1W1,L8IPA4,L8IAA7,L8HZL7,L8I177,L8IGC3,L8I4L3,L8IWR9,L8J188,L8IPF6,L8I3R4,L8IGV0,L8IVX7,L8HQI2,L8I7V5,L8I6J8,L8IFC2,…
4	GO:0071495	cellular response to endogenous stimulus	P	38	L8IUT8,L8HX98,L8I798,L8IX69,L8IGK5,L8I1N5,L8HXK3,L8IK78,L8IIM5,L8IXI6,L8IJ79,L8J595,L8I8M2,L8ICN2,L8IA65,L8J3Q3,L8HSM4,L8IFL3,L8I0B0,L8J224,L8I966,L8I177,L8J1K1,L8IUT9,L8HW79,L8I4L3,L8J4V3,L8IZ21,L8IGV0,L8HQ26,L8II73,L8IWP2,L8IKX6,L8IAM6,L8IVX7,L8IY25,L8HQI2,L8I7V5
4	GO:1901698	response to nitrogen compound	P	55	L8I2E4,L8HWY2,L8HXR1,L8I798,L8IX69,L8I463,L8IGK5,L8I1N5,L8IIM5,L8I958,L8IED3,L8I8M2,L8J595,L8ICD6,L8HK61,L8IRV6,L8J3Q3,L8J224,L8IUT9,L8IIM8,L8IWP2,L8IKX6,L8INI7,L8IUT8,L8HX98,L8IYJ5,L8J0U4,L8I3L2,L8ICD7,L8I6G2,L8IR50,L8IK78,L8IXI6,L8IJ79,L8ICN2,L8II96,L8IA65,L8HVI0,L8IFL3,L8I0B0,L8I966,L8I177,L8J1K1,L8HW79,L8I4L3,L8IWR9,L8IDK5,L8I3R4,L8IGV0,L8II73,L8IAM6,L8IVX7,L8IY25,L8HQI2,L8I7V5
4	GO:0006091	generation of precursor metabolites and energy	P	16	L8J0U4,L8IFC2,L8IZX3,L8HWY2,L8IC85,L8IAH1,L8HXP8,L8HZ66,L8J1B9,L8I7C0,L8ICD6,L8I3R4,L8IUU5,L8I8E6,L8HV64,L8IKX6
4	GO:0015980	energy derivation by oxidation of organic compounds	P	4	L8J1B9,L8HV64,L8I7C0,L8ICD6
4	GO:1901576	organic substance biosynthetic process	P	58	L8HWY2,L8IHA9,L8HSH3,L8HX22,L8I1N5,L8I958,L8I6V6,L8I7C0,L8ICD6,L8J0L8,L8HRW8,L8IJX9,L8IUY7,L8IUU5,L8I018,L8I9H6,L8IUY4,L8IGX7,L8I9A3,L8IJG9,L8IFJ0,L8HQN3,L8I8E6,L8HV64,L8IKX6,L8IBZ3,L8I2V5,L8J0U4,L8IYJ5,L8I870,L8I3L2,L8J197,L8IBA7,L8IC85,L8IK78,L8I9E0,L8HZ66,L8I944,L8J1X3,L8IGB4,L8HVI0,L8IJ81,L8IZX3,L8I662,L8HPA3,L8I966,L8HZL7,L8J1K1,L8I177,L8IKX5,L8IWR9,L8HXP8,L8I0I4,L8IDK5,L8HRT7,L8HTX7,L8II73,…
4	GO:0042180	cellular ketone metabolic process	P	5	L8J0U4,L8I7C0,L8IT90,L8II73,L8HXP8
4	GO:0044283	small molecule biosynthetic process	P	24	L8J0U4,L8I870,L8IZX3,L8HWY2,L8J197,L8I966,L8IC85,L8IUY4,L8IKX5,L8IGX7,L8HXP8,L8HZ66,L8J1X3,L8I6V6,L8I7C0,L8ICD6,L8J0L8,L8IUY7,L8IUU5,L8II73,L8I8E6,L8HV64,L8IKX6,L8IBZ3
4	GO:0044249	cellular biosynthetic process	P	53	L8J0U4,L8I6J8,L8IYJ5,L8I870,L8I3L2,L8HWY2,L8IHA9,L8J197,L8IBA7,L8IC85,L8HSH3,L8HX22,L8I1N5,L8IK78,L8I9E0,L8J2E7,L8I944,L8I6V6,L8IGB4,L8I7C0,L8ICD6,L8J0L8,L8HRW8,L8IJX9,L8IUY7,L8IUU5,L8HVI0,L8I018,L8IJ81,L8I662,L8HPA3,L8I966,L8J1K1,L8I177,L8I9H6,L8IUY4,L8IKX5,L8IGX7,L8IWR9,L8HXP8,L8I9A3,L8IJG9,L8J188,L8I0I4,L8IDK5,L8HRT7,L8HTX7,L8IFJ0,L8HQN3,L8II73,L8IKX6,L8IBZ3,L8I2V5
4	GO:0051186	cofactor metabolic process	P	18	L8IFC2,L8HVY9,L8IPA4,L8IXW8,L8I966,L8IC85,L8IGC3,L8IGX7,L8J052,L8I9A3,L8HT60,L8I0I4,L8J2E7,L8IPN7,L8I6V6,L8I7C0,L8IUU5,L8IKX6
4	GO:0031099	regeneration	P	22	L8J0U4,L8IQQ6,L8I798,L8IIF1,L8IUT9,L8IC85,L8IGC3,L8IK78,L8IXI6,L8IED3,L8I8M2,L8II96,L8IT90,L8IIL2,L8IRV6,L8IWP2,L8J3Q3,L8IAM6,L8HVI0,L8INI7,L8IGL8,L8IFL3
4	GO:0043207	response to external biotic stimulus	P	47	L8IQQ6,L8HWY2,L8HXR1,L8IHA9,L8I798,L8IX69,L8IMS7,L8J052,L8IFV7,L8I8M2,L8HK61,L8HMZ8,L8IJN1,L8IUY7,L8I018,L8IGL8,L8IF42,L8IM79,L8J224,L8IMB9,L8J0P6,L8IUY4,L8HNI0,L8IIM8,L8IGD5,L8IFJ0,L8HZ02,L8HQ26,L8HPM7,L8IWP2,L8IKX6,L8J0U4,L8I3L2,L8IK78,L8IXI6,L8IJ79,L8HND5,L8I793,L8I0B0,L8I177,L8J1K1,L8I4L3,L8J5K4,L8HTX7,L8II73,L8IAM6,L8HQI2
4	GO:0009991	response to extracellular stimulus	P	27	L8I491,L8IFC2,L8ICD7,L8IX69,L8J274,L8IR50,L8I9E0,L8J1B9,L8IXI6,L8IED3,L8I8M2,L8ICN2,L8ICD6,L8HND5,L8IRV6,L8IFL3,L8I0B0,L8IU68,L8I177,L8IGC3,L8IX54,L8I3R4,L8I5C0,L8HQ26,L8II73,L8IKX6,L8HQI2
4	GO:0001101	response to acid chemical	P	30	L8IYJ5,L8I3L2,L8ICD7,L8IX69,L8J274,L8I1N5,L8IIM5,L8IJ79,L8J595,L8IED3,L8I8M2,L8IUY7,L8HND5,L8IRV6,L8HVI0,L8IFL3,L8I0B0,L8J224,L8I966,L8J1K1,L8IUT9,L8I177,L8IDK5,L8IZ21,L8HQ26,L8IWP2,L8IKX6,L8INI7,L8HQI2,L8I7V5
4	GO:0042592	homeostatic process	P	70	L8IFC2,L8HXR1,L8HWY2,L8IHA9,L8IX69,L8IGK5,L8J274,L8HX22,L8HXK3,L8HRD1,L8IIM5,L8J1B9,L8HZM0,L8IKT6,L8IJX9,L8HMZ8,L8IJN1,L8IUY7,L8IUU5,L8J3Q3,L8I018,L8IBF2,L8IU68,L8HVY9,L8J224,L8IAH1,L8HWB6,L8HYP7,L8I5C0,L8I9K6,L8IWP2,L8HV64,L8IBZ3,L8IUT8,L8J0U4,L8HW49,L8IYJ5,L8I3L2,L8IBA7,L8IC85,L8IK78,L8I9E0,L8J2E7,L8IXI6,L8IHQ3,L8HND5,L8IDW8,L8I793,L8HVI0,L8IJ81,L8IV54,L8HW02,L8HPA3,L8J1K1,L8IGC3,L8I4L3,L8IKX5,…
4	GO:0055082	cellular chemical homeostasis	P	33	L8HXR1,L8HWY2,L8IHA9,L8IBA7,L8IC85,L8J274,L8HXK3,L8I9E0,L8IIM5,L8J1B9,L8HZM0,L8IDW8,L8I793,L8I018,L8IBF2,L8HVY9,L8J1K1,L8IGC3,L8I4L3,L8IAH1,L8HWB6,L8I0I4,L8HYP7,L8IZ21,L8I3R4,L8I9K6,L8IGV0,L8HX06,L8IWP2,L8II73,L8IAM6,L8IY25,L8HUH1
4	GO:0044092	negative regulation of molecular function	P	52	L8IX25,L8IH78,L8HXR1,L8HSX9,L8I463,L8IIM5,L8IED3,L8IM56,L8HRW8,L8HK61,L8HMZ8,L8IJN1,L8IGL8,L8HN27,L8IU68,L8HW35,L8IIF1,L8IIM8,L8HYP7,L8HLW7,L8INI7,L8IK42,L8ICD7,L8HP51,L8I6Z9,L8ILP2,L8IC85,L8IK78,L8I9E0,L8J5Y3,L8II96,L8IHQ3,L8I9I2,L8IH11,L8IE45,L8IXR3,L8HSM4,L8J2N7,L8IV54,L8IFL3,L8J1K1,L8I177,L8IGC3,L8I4L3,L8I3Z2,L8IHV8,L8IZ21,L8I3S5,L8HTX7,L8HX06,L8IIU6,L8HQI2
4	GO:0019637	organophosphate metabolic process	P	30	L8J0U4,L8HWY2,L8IHA9,L8IY30,L8IBA7,L8IC85,L8HZ66,L8IJ79,L8I6V6,L8ICD6,L8IJX9,L8I018,L8IJ81,L8IZX3,L8IPA4,L8I966,L8I2P8,L8IUY4,L8IGC3,L8IGX7,L8HXP8,L8I9A3,L8I0I4,L8IDK5,L8HWS9,L8HTX7,L8I8E6,L8HV64,L8IKX6,L8I7V5
4	GO:0097164	ammonium ion metabolic process	P	7	L8HWS9,L8HTX7,L8IJX9,L8J197,L8I966,L8J1K1,L8IJ81
4	GO:0006793	phosphorus metabolic process	P	44	L8HWY2,L8IHA9,L8IY30,L8IMS7,L8J274,L8I6V6,L8ICD6,L8HRW8,L8IJX9,L8I018,L8IUT9,L8I2P8,L8I9H6,L8IUY4,L8IAH1,L8I7A3,L8IGX7,L8I9A3,L8IWC2,L8I8E6,L8HV64,L8IKX6,L8J0U4,L8INB2,L8IBA7,L8IC85,L8HZ66,L8IXI6,L8IJ79,L8I9I2,L8I793,L8IJ81,L8I0B0,L8IZX3,L8IPA4,L8I966,L8IGC3,L8HXP8,L8I0I4,L8IDK5,L8HWS9,L8HTX7,L8HX06,L8I7V5
4	GO:0006066	alcohol metabolic process	P	14	L8J0U4,L8I3L2,L8IM79,L8HWY2,L8J197,L8IY30,L8I4L3,L8HXP8,L8I9E0,L8J1X3,L8HTX7,L8IJX9,L8II73,L8IJ81
4	GO:0043933	protein-containing complex subunit organization	P	54	L8IHA9,L8I798,L8HXK3,L8HRD1,L8IIM5,L8IJS0,L8J595,L8IJX9,L8I018,L8IMB9,L8IXW8,L8IUT9,L8I9H6,L8HNI0,L8IJG9,L8IX54,L8IWP2,L8HV64,L8INI7,L8IS69,L8J0U4,L8I870,L8I3L2,L8IN10,L8IR50,L8I9E0,L8J5Y3,L8HRK0,L8I944,L8ITU9,L8IHQ3,L8I9I2,L8IS72,L8I793,L8J2N7,L8I0B0,L8I612,L8IAA7,L8HPA3,L8I966,L8HYH0,L8J1K1,L8I177,L8HW79,L8IGC3,L8I4L3,L8I3Z2,L8HWS9,L8I3S5,L8HTX7,L8J0L1,L8HX06,L8IVX7,L8HQI2
4	GO:0034369	plasma lipoprotein particle remodeling	P	7	L8HWS9,L8I3L2,L8HTX7,L8IHQ3,L8IJX9,L8HX06,L8I9E0
4	GO:0022607	cellular component assembly	P	63	L8HXR1,L8IHA9,L8I798,L8J121,L8HSH3,L8HX22,L8HXK3,L8HRD1,L8IIM5,L8IJS0,L8J595,L8IRV6,L8I018,L8IJW9,L8IM79,L8IMB9,L8IXW8,L8I9H6,L8HNU2,L8HNI0,L8IJG9,L8HWB6,L8IX54,L8I5C0,L8IWP2,L8HV64,L8INI7,L8IS69,L8J0U4,L8INB2,L8I870,L8IN10,L8IR50,L8I9E0,L8J5Y3,L8J2E7,L8HRK0,L8I944,L8IJ79,L8ITU9,L8IHQ3,L8I9I2,L8IS72,L8I793,L8IHP9,L8I0B0,L8I612,L8HPA3,L8I966,L8HYH0,L8I177,L8J1K1,L8HZL7,L8HW79,L8IGC3,L8I4L3,L8I3Z2,…
4	GO:0034377	plasma lipoprotein particle assembly	P	5	L8IHQ3,L8HTX7,L8I018,L8I9E0,L8IHA9
4	GO:0098542	defense response to other organism	P	19	L8IQQ6,L8HWY2,L8IMB9,L8I798,L8I177,L8IMS7,L8IUY4,L8I4L3,L8J052,L8J5K4,L8IK78,L8IIM8,L8HTX7,L8HMZ8,L8IUY7,L8HQ26,L8HPM7,L8IGL8,L8I0B0
4	GO:0032409	regulation of transporter activity	P	17	L8HW49,L8IFC2,L8HWY2,L8HXR1,L8J1K1,L8IC85,L8HW79,L8I4L3,L8HYP7,L8IIM5,L8HTX7,L8I3R4,L8HLW7,L8HND5,L8HX06,L8IWP2,L8IVX7
4	GO:0010817	regulation of hormone levels	P	27	L8I3L2,L8ICD7,L8J0I1,L8I798,L8ILP2,L8HXK3,L8J1B9,L8J1X3,L8IT90,L8IUU5,L8HND5,L8IDW8,L8I793,L8HVI0,L8IU59,L8J224,L8I7A3,L8J2M2,L8IDK7,L8HPM7,L8II73,L8IWP2,L8HV64,L8HX06,L8IVX7,L8HQI2,L8I7V5
4	GO:0034754	cellular hormone metabolic process	P	6	L8J1X3,L8I3L2,L8IT90,L8IUU5,L8II73,L8I7V5
4	GO:0017144	drug metabolic process	P	17	L8J0U4,L8I6J8,L8HWY2,L8I966,L8J1K1,L8IGX7,L8J188,L8HT60,L8HWS9,L8I6V6,L8IT90,L8J0L8,L8HRW8,L8IUU5,L8II73,L8IKX6,L8IU59
4	GO:0008104	protein localization	P	54	L8HXR1,L8IHA9,L8HWY2,L8IX69,L8J121,L8IMS7,L8I6V6,L8IT90,L8I284,L8IG34,L8I018,L8I7Z4,L8J1H5,L8I109,L8IAH1,L8IGX7,L8HNU2,L8IIM8,L8J4V3,L8HWB6,L8IX54,L8IGD5,L8IEH4,L8I9K6,L8IB79,L8IWC2,L8IWP2,L8IBZ3,L8IS69,L8I3L2,L8HXM6,L8IAC6,L8IK78,L8I9E0,L8IJ79,L8ITU9,L8IKN2,L8J1T9,L8HND5,L8IH11,L8IS72,L8I793,L8HQI2,L8I0B0,L8I7Q8,L8HYH0,L8I0I4,L8HRT7,L8J0L1,L8IT07,L8HX06,L8IVX7,L8IAB5,L8IU59
4	GO:0045184	establishment of protein localization	P	43	L8HWY2,L8IHA9,L8IX69,L8J121,L8I6V6,L8IT90,L8I284,L8IG34,L8I018,L8I7Z4,L8J1H5,L8I109,L8IAH1,L8IGX7,L8IIM8,L8J4V3,L8HWB6,L8IX54,L8IGD5,L8IEH4,L8I9K6,L8IB79,L8IBZ3,L8I3L2,L8HXM6,L8IAC6,L8IK78,L8I9E0,L8IJ79,L8ITU9,L8IKN2,L8J1T9,L8IH11,L8IS72,L8I793,L8I0B0,L8I7Q8,L8I0I4,L8HRT7,L8IT07,L8HX06,L8IVX7,L8IAB5
4	GO:0046907	intracellular transport	P	39	L8I3L2,L8IHA9,L8HXM6,L8IX69,L8J121,L8I463,L8IAC6,L8HXK3,L8I1N5,L8IJ79,L8IKN2,L8ISD0,L8J1T9,L8IH11,L8IG34,L8I018,L8I7Z4,L8J1H5,L8IDJ1,L8I7Q8,L8I109,L8I4L3,L8HNI0,L8IIM8,L8J4V3,L8IDK7,L8HWB6,L8IX54,L8I3S5,L8IGD5,L8IEH4,L8I9K6,L8IT07,L8IB79,L8HX06,L8II73,L8IBZ3,L8IIU6,L8IS69
4	GO:0070727	cellular macromolecule localization	P	33	L8HXR1,L8HWY2,L8J121,L8IMS7,L8IG34,L8I7Z4,L8J1H5,L8I109,L8HNU2,L8J4V3,L8HWB6,L8IGD5,L8I9K6,L8IB79,L8IWC2,L8IWP2,L8IBZ3,L8I3L2,L8IAC6,L8I9E0,L8ITU9,L8IKN2,L8J1T9,L8IH11,L8IS72,L8HQI2,L8I0B0,L8HYH0,L8J0L1,L8IT07,L8HX06,L8IVX7,L8IU59
4	GO:0051649	establishment of localization in cell	P	44	L8IHA9,L8IX69,L8J121,L8I463,L8I1N5,L8HXK3,L8IG34,L8I018,L8I7Z4,L8J1H5,L8IDJ1,L8I109,L8HNI0,L8IIM8,L8J4V3,L8HWB6,L8IX54,L8IGD5,L8IEH4,L8I9K6,L8IB79,L8IWP2,L8IBZ3,L8IS69,L8I3L2,L8HXM6,L8IAC6,L8IJ79,L8IKN2,L8ISD0,L8J1T9,L8IH11,L8IDW8,L8I0B0,L8I7Q8,L8I4L3,L8IDK7,L8I0I4,L8I3S5,L8IT07,L8HX06,L8II73,L8IIU6,L8IHZ4
4	GO:0071216	cellular response to biotic stimulus	P	11	L8IX69,L8I177,L8IXI6,L8IFV7,L8IJ79,L8IFJ0,L8HND5,L8IH11,L8II73,L8IAM6,L8IKX6
4	GO:0002347	response to tumor cell	P	3	L8IH11,L8IGL8,L8IGB4
4	GO:0009988	cell-cell recognition	P	3	L8J0U4,L8HN27,L8IJS0
4	GO:0003013	circulatory system process	P	13	L8I612,L8HXR1,L8I798,L8IGC3,L8I9E0,L8IJ79,L8IGV0,L8HX06,L8IWP2,L8IVX7,L8INI7,L8J2N7,L8IF42
4	GO:0050886	endocrine process	P	3	L8IJ79,L8HX06,L8J2N7
4	GO:0090066	regulation of anatomical structure size	P	22	L8J0U4,L8HXR1,L8IHA9,L8I798,L8J1K1,L8IGC3,L8HXK3,L8I9E0,L8INI7,L8HRD1,L8IPF6,L8IJ79,L8IKN2,L8IGV0,L8IRV6,L8HX06,L8IWP2,L8IVX7,L8I018,L8J2N7,L8IF42,L8HQI2
4	GO:0097435	supramolecular fiber organization	P	11	L8INB2,L8HXR1,L8IAA7,L8HPA3,L8J1K1,L8IUT9,L8IRV6,L8HXK3,L8IG16,L8J2N7,L8I7V5
4	GO:0035239	tube morphogenesis	P	16	L8J224,L8HPA3,L8IX69,L8IUT9,L8IK78,L8I9E0,L8IIM5,L8IJ79,L8I5C0,L8IWP2,L8J3Q3,L8I793,L8INI7,L8IM29,L8J2N7,L8I7V5
4	GO:0044087	regulation of cellular component biogenesis	P	40	L8J0U4,L8IYJ5,L8HXR1,L8IHA9,L8HXM6,L8J121,L8IK78,L8HXK3,L8J5Y3,L8I9E0,L8IJ79,L8I958,L8IIL2,L8ICN2,L8IJX9,L8I9I2,L8J1B1,L8IRV6,L8I793,L8HVI0,L8I018,L8J351,L8J2N7,L8IB09,L8J224,L8HYH0,L8HZL7,L8J1K1,L8IUT9,L8I9H6,L8I4L3,L8I3Z2,L8HWB6,L8IDK7,L8IPF6,L8IEH4,L8J0L1,L8HX06,L8IWP2,L8IM29
4	GO:1900046	regulation of hemostasis	P	9	L8IU68,L8IP29,L8IX25,L8HXR1,L8I798,L8IIF1,L8IAM6,L8I9E0,L8J2N7
4	GO:0042596	fear response	P	1	L8IFL3
4	GO:0030595	leukocyte chemotaxis	P	3	L8IPF6,L8IFL3,L8J1B1
4	GO:0002523	leukocyte migration involved in inflammatory response	P	1	L8IFL3
4	GO:0002366	leukocyte activation involved in immune response	P	35	L8J0U4,L8IQQ6,L8HP51,L8J0I1,L8J197,L8IBA7,L8IMS7,L8J052,L8IAC6,L8IK78,L8I6V6,L8I284,L8I493,L8J1B1,L8J3Q3,L8IB09,L8IFL3,L8IF42,L8IQ63,L8J0P6,L8J1K1,L8IIF1,L8IDE2,L8I177,L8IGX7,L8HWB6,L8J332,L8HRM3,L8IEH4,L8HZ02,L8I8E6,L8IAM6,L8IVX7,L8IIU6,L8IQM1
4	GO:0002263	cell activation involved in immune response	P	36	L8J0U4,L8IQQ6,L8HP51,L8J0I1,L8J197,L8IBA7,L8IMS7,L8J052,L8IAC6,L8IK78,L8I6V6,L8I284,L8I493,L8J1B1,L8J3Q3,L8IB09,L8IFL3,L8IF42,L8IQ63,L8J0P6,L8J1K1,L8IIF1,L8IDE2,L8I177,L8I4L3,L8IGX7,L8HWB6,L8J332,L8HRM3,L8IEH4,L8HZ02,L8I8E6,L8IAM6,L8IVX7,L8IIU6,L8IQM1
4	GO:0046649	lymphocyte activation	P	13	L8J1K1,L8IUT9,L8IK78,L8HNI0,L8HRD1,L8IWP2,L8J3Q3,L8I793,L8IVX7,L8IJW9,L8IB09,L8IHP9,L8IFL3
4	GO:0007588	excretion	P	1	L8IFL3
4	GO:0110149	regulation of biomineralization	P	8	L8IUT8,L8IYJ5,L8HRK0,L8IUT9,L8IWP2,L8I793,L8IK78,L8IFL3
4	GO:0033554	cellular response to stress	P	46	L8I491,L8IFC2,L8HWY2,L8HXR1,L8IX69,L8HSX9,L8I463,L8J274,L8I1N5,L8IR50,L8IK78,L8HZ66,L8HRD1,L8IIM5,L8IXI6,L8IJ79,L8J595,L8I6V6,L8IIL2,L8ICN2,L8I9I2,L8IDW8,L8IXR3,L8IFL3,L8I0B0,L8IZX3,L8IM79,L8HW02,L8I1W1,L8HYH0,L8J1K1,L8I177,L8I9H6,L8IGC3,L8IGX7,L8IJG9,L8J4V3,L8IX54,L8IPN7,L8IB79,L8HQN3,L8ISB9,L8HX06,L8IAM6,L8IS69,L8I7V5
4	GO:0104004	cellular response to environmental stimulus	P	12	L8I491,L8HYH0,L8HXK3,L8HRD1,L8IIM5,L8IJ79,L8ICN2,L8I9I2,L8ISB9,L8HX06,L8IWP2,L8IFL3
4	GO:0071214	cellular response to abiotic stimulus	P	12	L8I491,L8IIM5,L8IJ79,L8ICN2,L8I9I2,L8HYH0,L8ISB9,L8HX06,L8IWP2,L8HXK3,L8IFL3,L8HRD1
4	GO:0036119	response to platelet-derived growth factor	P	6	L8J595,L8J1K1,L8IWP2,L8HXK3,L8IFL3,L8I7V5
4	GO:0007281	germ cell development	P	2	L8IBA7,L8IFL3
4	GO:0048468	cell development	P	20	L8HW49,L8HPA3,L8IBA7,L8J1K1,L8IUT9,L8HX22,L8I4L3,L8IK78,L8HXK3,L8J4V3,L8I0I4,L8I958,L8HLW7,L8HND5,L8IRV6,L8HX06,L8J3Q3,L8I793,L8INI7,L8IFL3
4	GO:0071496	cellular response to external stimulus	P	17	L8I491,L8IFC2,L8IX69,L8J274,L8IGC3,L8IR50,L8HXK3,L8IX54,L8IXI6,L8ICN2,L8ICD6,L8HND5,L8HQ26,L8HX06,L8IWP2,L8IFL3,L8I0B0
4	GO:0070482	response to oxygen levels	P	30	L8J0U4,L8IYJ5,L8HWY2,L8HXR1,L8IX69,L8HZ66,L8J2E7,L8IJ79,L8I958,L8ICD6,L8I9I2,L8HND5,L8IDW8,L8J3Q3,L8I793,L8HVI0,L8IGL8,L8IFL3,L8IZX3,L8IAA7,L8J1K1,L8I177,L8IGC3,L8IAH1,L8J4V3,L8IAM6,L8INI7,L8IM29,L8HQI2,L8I7V5
4	GO:0032989	cellular component morphogenesis	P	21	L8I870,L8IM79,L8J224,L8IX69,L8IBA7,L8J1K1,L8IUT9,L8IVA1,L8IKX5,L8IK78,L8HNU2,L8IG16,L8IXI6,L8IJ79,L8HRT7,L8IKN2,L8HSA3,L8IHP9,L8IWP2,L8HSM4,L8IFL3
4	GO:0061061	muscle structure development	P	5	L8HW49,L8ITU9,L8I9I2,L8IS72,L8J4V3
[truncated: 5,138 more rows]

## Sheet: MF
Level	GO ID	GO-Term	GO Type	#Seqs	Sequence Names
[truncated: 973 more rows]

## Sheet: CC
Level	GO ID	GO-Term	GO Type	#Seqs	Sequence Names
[truncated: 623 more rows]

## Sheet: enrichment
GO-ID	GO-Term	Category	FDR	P-Value	#Diff	Over/Under	TestSeqs
[truncated: 3,788 more rows]
