# Supplementary material for: Combined transcriptome and proteome analysis of yak PASMCs under hypoxic and normoxic conditions
Source: PeerJ. 2022 Nov 25;10:e14369. doi: 10.7717/peerj.14369 (PMC9703989; doi:10.7717/peerj.14369)
Supplement: Supplemental Information 6 [file peerj-10-14369-s006.xlsx]

## Sheet: query2map
Protein ID	KO	Name	Definition	Map ID	Map Name	URL
L8HX98	K01369	LGMN	legumain [EC:3.4.22.34]	ko04142	Lysosome	http://www.kegg.jp/kegg-bin/show_pathway?ko04142+K01369
L8HX98	K01369	LGMN	legumain [EC:3.4.22.34]	ko04612	Antigen processing and presentation	http://www.kegg.jp/kegg-bin/show_pathway?ko04612+K01369
L8I7C0	K03948	NDUFA4	NADH dehydrogenase (ubiquinone) 1 alpha subcomplex subunit 4	ko00190	Oxidative phosphorylation	http://www.kegg.jp/kegg-bin/show_pathway?ko00190+K03948
L8I7C0	K03948	NDUFA4	NADH dehydrogenase (ubiquinone) 1 alpha subcomplex subunit 4	ko01100	Metabolic pathways	http://www.kegg.jp/kegg-bin/show_pathway?ko01100+K03948
L8I7C0	K03948	NDUFA4	NADH dehydrogenase (ubiquinone) 1 alpha subcomplex subunit 4	ko04714	Thermogenesis	http://www.kegg.jp/kegg-bin/show_pathway?ko04714+K03948
L8I7C0	K03948	NDUFA4	NADH dehydrogenase (ubiquinone) 1 alpha subcomplex subunit 4	ko04723	Retrograde endocannabinoid signaling	http://www.kegg.jp/kegg-bin/show_pathway?ko04723+K03948
L8I7C0	K03948	NDUFA4	NADH dehydrogenase (ubiquinone) 1 alpha subcomplex subunit 4	ko04932	Non-alcoholic fatty liver disease	http://www.kegg.jp/kegg-bin/show_pathway?ko04932+K03948
L8I7C0	K03948	NDUFA4	NADH dehydrogenase (ubiquinone) 1 alpha subcomplex subunit 4	ko05010	Alzheimer disease	http://www.kegg.jp/kegg-bin/show_pathway?ko05010+K03948
L8I7C0	K03948	NDUFA4	NADH dehydrogenase (ubiquinone) 1 alpha subcomplex subunit 4	ko05012	Parkinson disease	http://www.kegg.jp/kegg-bin/show_pathway?ko05012+K03948
L8I7C0	K03948	NDUFA4	NADH dehydrogenase (ubiquinone) 1 alpha subcomplex subunit 4	ko05014	Amyotrophic lateral sclerosis	http://www.kegg.jp/kegg-bin/show_pathway?ko05014+K03948
L8I7C0	K03948	NDUFA4	NADH dehydrogenase (ubiquinone) 1 alpha subcomplex subunit 4	ko05016	Huntington disease	http://www.kegg.jp/kegg-bin/show_pathway?ko05016+K03948
L8I7C0	K03948	NDUFA4	NADH dehydrogenase (ubiquinone) 1 alpha subcomplex subunit 4	ko05020	Prion disease	http://www.kegg.jp/kegg-bin/show_pathway?ko05020+K03948
L8I7C0	K03948	NDUFA4	NADH dehydrogenase (ubiquinone) 1 alpha subcomplex subunit 4	ko05022	Pathways of neurodegeneration - multiple diseases	http://www.kegg.jp/kegg-bin/show_pathway?ko05022+K03948
L8I7C0	K03948	NDUFA4	NADH dehydrogenase (ubiquinone) 1 alpha subcomplex subunit 4	ko05415	Diabetic cardiomyopathy	http://www.kegg.jp/kegg-bin/show_pathway?ko05415+K03948
L8I8M2	K17308	ORM, AGP	alpha-1-acid glycoprotein
L8HZM0	K13536	MARCKSL1, MRP	MARCKS-related protein	ko04666	Fc gamma R-mediated phagocytosis	http://www.kegg.jp/kegg-bin/show_pathway?ko04666+K13536
L8HZM0	K13536	MARCKSL1, MRP	MARCKS-related protein	ko05140	Leishmaniasis	http://www.kegg.jp/kegg-bin/show_pathway?ko05140+K13536
L8IM56	K04525	SERPINA	serpin A
L8HTX7	K08758	APOA2	apolipoprotein A-II	ko03320	PPAR signaling pathway	http://www.kegg.jp/kegg-bin/show_pathway?ko03320+K08758
L8HTX7	K08758	APOA2	apolipoprotein A-II	ko04979	Cholesterol metabolism	http://www.kegg.jp/kegg-bin/show_pathway?ko04979+K08758
L8IT90	K16144	AFP	alpha-fetoprotein	ko04390	Hippo signaling pathway	http://www.kegg.jp/kegg-bin/show_pathway?ko04390+K16144
L8IH11	K20910	TXNIP	thioredoxin-interacting protein	ko04621	NOD-like receptor signaling pathway	http://www.kegg.jp/kegg-bin/show_pathway?ko04621+K20910
L8HN27	K23411	FETUB	fetuin-B
L8J2N7	K03983	SERPINF2, AAP	alpha-2-antiplasmin	ko04610	Complement and coagulation cascades	http://www.kegg.jp/kegg-bin/show_pathway?ko04610+K03983
L8IFL3	K16642	PTN	pleiotrophin
L8ITU9	K11275	H1_5	histone H1/5
L8IIU6	K03984	SERPINA1, AAT	alpha-1-antitrypsin	ko04610	Complement and coagulation cascades	http://www.kegg.jp/kegg-bin/show_pathway?ko04610+K03984
L8I0I4	K01074	PPT	palmitoyl-protein thioesterase [EC:3.1.2.22]	ko00062	Fatty acid elongation	http://www.kegg.jp/kegg-bin/show_pathway?ko00062+K01074
L8I0I4	K01074	PPT	palmitoyl-protein thioesterase [EC:3.1.2.22]	ko01100	Metabolic pathways	http://www.kegg.jp/kegg-bin/show_pathway?ko01100+K01074
L8I0I4	K01074	PPT	palmitoyl-protein thioesterase [EC:3.1.2.22]	ko01212	Fatty acid metabolism	http://www.kegg.jp/kegg-bin/show_pathway?ko01212+K01074
L8I0I4	K01074	PPT	palmitoyl-protein thioesterase [EC:3.1.2.22]	ko04142	Lysosome	http://www.kegg.jp/kegg-bin/show_pathway?ko04142+K01074
L8IIG2	K17307	FBLN1_2	fibulin 1/2
L8HN01	K24154	UFSP1	Ufm1-specific protease 1
L8ICN2
L8HV64	K00850	pfkA, PFK	6-phosphofructokinase 1 [EC:2.7.1.11]	ko00010	Glycolysis / Gluconeogenesis	http://www.kegg.jp/kegg-bin/show_pathway?ko00010+K00850
L8HV64	K00850	pfkA, PFK	6-phosphofructokinase 1 [EC:2.7.1.11]	ko00030	Pentose phosphate pathway	http://www.kegg.jp/kegg-bin/show_pathway?ko00030+K00850
L8HV64	K00850	pfkA, PFK	6-phosphofructokinase 1 [EC:2.7.1.11]	ko00051	Fructose and mannose metabolism	http://www.kegg.jp/kegg-bin/show_pathway?ko00051+K00850
L8HV64	K00850	pfkA, PFK	6-phosphofructokinase 1 [EC:2.7.1.11]	ko00052	Galactose metabolism	http://www.kegg.jp/kegg-bin/show_pathway?ko00052+K00850
L8HV64	K00850	pfkA, PFK	6-phosphofructokinase 1 [EC:2.7.1.11]	ko00680	Methane metabolism	http://www.kegg.jp/kegg-bin/show_pathway?ko00680+K00850
L8HV64	K00850	pfkA, PFK	6-phosphofructokinase 1 [EC:2.7.1.11]	ko01100	Metabolic pathways	http://www.kegg.jp/kegg-bin/show_pathway?ko01100+K00850
L8HV64	K00850	pfkA, PFK	6-phosphofructokinase 1 [EC:2.7.1.11]	ko01110	Biosynthesis of secondary metabolites	http://www.kegg.jp/kegg-bin/show_pathway?ko01110+K00850
L8HV64	K00850	pfkA, PFK	6-phosphofructokinase 1 [EC:2.7.1.11]	ko01120	Microbial metabolism in diverse environments	http://www.kegg.jp/kegg-bin/show_pathway?ko01120+K00850
L8HV64	K00850	pfkA, PFK	6-phosphofructokinase 1 [EC:2.7.1.11]	ko01200	Carbon metabolism	http://www.kegg.jp/kegg-bin/show_pathway?ko01200+K00850
L8HV64	K00850	pfkA, PFK	6-phosphofructokinase 1 [EC:2.7.1.11]	ko01230	Biosynthesis of amino acids	http://www.kegg.jp/kegg-bin/show_pathway?ko01230+K00850
L8HV64	K00850	pfkA, PFK	6-phosphofructokinase 1 [EC:2.7.1.11]	ko03018	RNA degradation	http://www.kegg.jp/kegg-bin/show_pathway?ko03018+K00850
L8HV64	K00850	pfkA, PFK	6-phosphofructokinase 1 [EC:2.7.1.11]	ko04066	HIF-1 signaling pathway	http://www.kegg.jp/kegg-bin/show_pathway?ko04066+K00850
L8HV64	K00850	pfkA, PFK	6-phosphofructokinase 1 [EC:2.7.1.11]	ko04152	AMPK signaling pathway	http://www.kegg.jp/kegg-bin/show_pathway?ko04152+K00850
L8HV64	K00850	pfkA, PFK	6-phosphofructokinase 1 [EC:2.7.1.11]	ko04919	Thyroid hormone signaling pathway	http://www.kegg.jp/kegg-bin/show_pathway?ko04919+K00850
L8HV64	K00850	pfkA, PFK	6-phosphofructokinase 1 [EC:2.7.1.11]	ko04922	Glucagon signaling pathway	http://www.kegg.jp/kegg-bin/show_pathway?ko04922+K00850
L8HV64	K00850	pfkA, PFK	6-phosphofructokinase 1 [EC:2.7.1.11]	ko05230	Central carbon metabolism in cancer	http://www.kegg.jp/kegg-bin/show_pathway?ko05230+K00850
L8I798	K03903	FGA	fibrinogen alpha chain	ko04610	Complement and coagulation cascades	http://www.kegg.jp/kegg-bin/show_pathway?ko04610+K03903
L8I798	K03903	FGA	fibrinogen alpha chain	ko04611	Platelet activation	http://www.kegg.jp/kegg-bin/show_pathway?ko04611+K03903
L8I798	K03903	FGA	fibrinogen alpha chain	ko04613	Neutrophil extracellular trap formation	http://www.kegg.jp/kegg-bin/show_pathway?ko04613+K03903
L8I798	K03903	FGA	fibrinogen alpha chain	ko05171	Coronavirus disease - COVID-19	http://www.kegg.jp/kegg-bin/show_pathway?ko05171+K03903
L8HZ66	K00927	PGK, pgk	phosphoglycerate kinase [EC:2.7.2.3]	ko00010	Glycolysis / Gluconeogenesis	http://www.kegg.jp/kegg-bin/show_pathway?ko00010+K00927
L8HZ66	K00927	PGK, pgk	phosphoglycerate kinase [EC:2.7.2.3]	ko00710	Carbon fixation in photosynthetic organisms	http://www.kegg.jp/kegg-bin/show_pathway?ko00710+K00927
L8HZ66	K00927	PGK, pgk	phosphoglycerate kinase [EC:2.7.2.3]	ko01100	Metabolic pathways	http://www.kegg.jp/kegg-bin/show_pathway?ko01100+K00927
L8HZ66	K00927	PGK, pgk	phosphoglycerate kinase [EC:2.7.2.3]	ko01110	Biosynthesis of secondary metabolites	http://www.kegg.jp/kegg-bin/show_pathway?ko01110+K00927
L8HZ66	K00927	PGK, pgk	phosphoglycerate kinase [EC:2.7.2.3]	ko01120	Microbial metabolism in diverse environments	http://www.kegg.jp/kegg-bin/show_pathway?ko01120+K00927
L8HZ66	K00927	PGK, pgk	phosphoglycerate kinase [EC:2.7.2.3]	ko01200	Carbon metabolism	http://www.kegg.jp/kegg-bin/show_pathway?ko01200+K00927
L8HZ66	K00927	PGK, pgk	phosphoglycerate kinase [EC:2.7.2.3]	ko01230	Biosynthesis of amino acids	http://www.kegg.jp/kegg-bin/show_pathway?ko01230+K00927
L8HZ66	K00927	PGK, pgk	phosphoglycerate kinase [EC:2.7.2.3]	ko04066	HIF-1 signaling pathway	http://www.kegg.jp/kegg-bin/show_pathway?ko04066+K00927
L8J4V3	K07611	LMNB	lamin B	ko04210	Apoptosis	http://www.kegg.jp/kegg-bin/show_pathway?ko04210+K07611
L8J4V3	K07611	LMNB	lamin B	ko04214	Apoptosis - fly	http://www.kegg.jp/kegg-bin/show_pathway?ko04214+K07611
L8HXM6	K19680	TRAF3IP1, IFT54	TRAF3-interacting protein 1
L8I2P8
L8HK61	K04525	SERPINA	serpin A
L8HW35	K04525	SERPINA	serpin A
L8IE45	K17095	ANXA7_11	annexin A7/11	ko05014	Amyotrophic lateral sclerosis	http://www.kegg.jp/kegg-bin/show_pathway?ko05014+K17095
L8ICD7	K20734	SERPINA7, TBG	thyroxine-binding globulin	ko04918	Thyroid hormone synthesis	http://www.kegg.jp/kegg-bin/show_pathway?ko04918+K20734
L8I8E6	K01834	PGAM, gpmA	2,3-bisphosphoglycerate-dependent phosphoglycerate mutase [EC:5.4.2.11]	ko00010	Glycolysis / Gluconeogenesis	http://www.kegg.jp/kegg-bin/show_pathway?ko00010+K01834
L8I8E6	K01834	PGAM, gpmA	2,3-bisphosphoglycerate-dependent phosphoglycerate mutase [EC:5.4.2.11]	ko00260	Glycine, serine and threonine metabolism	http://www.kegg.jp/kegg-bin/show_pathway?ko00260+K01834
L8I8E6	K01834	PGAM, gpmA	2,3-bisphosphoglycerate-dependent phosphoglycerate mutase [EC:5.4.2.11]	ko00680	Methane metabolism	http://www.kegg.jp/kegg-bin/show_pathway?ko00680+K01834
L8I8E6	K01834	PGAM, gpmA	2,3-bisphosphoglycerate-dependent phosphoglycerate mutase [EC:5.4.2.11]	ko01100	Metabolic pathways	http://www.kegg.jp/kegg-bin/show_pathway?ko01100+K01834
L8I8E6	K01834	PGAM, gpmA	2,3-bisphosphoglycerate-dependent phosphoglycerate mutase [EC:5.4.2.11]	ko01110	Biosynthesis of secondary metabolites	http://www.kegg.jp/kegg-bin/show_pathway?ko01110+K01834
L8I8E6	K01834	PGAM, gpmA	2,3-bisphosphoglycerate-dependent phosphoglycerate mutase [EC:5.4.2.11]	ko01120	Microbial metabolism in diverse environments	http://www.kegg.jp/kegg-bin/show_pathway?ko01120+K01834
L8I8E6	K01834	PGAM, gpmA	2,3-bisphosphoglycerate-dependent phosphoglycerate mutase [EC:5.4.2.11]	ko01200	Carbon metabolism	http://www.kegg.jp/kegg-bin/show_pathway?ko01200+K01834
L8I8E6	K01834	PGAM, gpmA	2,3-bisphosphoglycerate-dependent phosphoglycerate mutase [EC:5.4.2.11]	ko01230	Biosynthesis of amino acids	http://www.kegg.jp/kegg-bin/show_pathway?ko01230+K01834
L8I8E6	K01834	PGAM, gpmA	2,3-bisphosphoglycerate-dependent phosphoglycerate mutase [EC:5.4.2.11]	ko04922	Glucagon signaling pathway	http://www.kegg.jp/kegg-bin/show_pathway?ko04922+K01834
L8I8E6	K01834	PGAM, gpmA	2,3-bisphosphoglycerate-dependent phosphoglycerate mutase [EC:5.4.2.11]	ko05230	Central carbon metabolism in cancer	http://www.kegg.jp/kegg-bin/show_pathway?ko05230+K01834
L8HYH0	K10847	XPA	DNA-repair protein complementing XP-A cells	ko01524	Platinum drug resistance	http://www.kegg.jp/kegg-bin/show_pathway?ko01524+K10847
L8HYH0	K10847	XPA	DNA-repair protein complementing XP-A cells	ko03420	Nucleotide excision repair	http://www.kegg.jp/kegg-bin/show_pathway?ko03420+K10847
L8J0L8	K08967	mtnD, mtnZ, ADI1	1,2-dihydroxy-3-keto-5-methylthiopentene dioxygenase [EC:1.13.11.53 1.13.11.54]	ko00270	Cysteine and methionine metabolism	http://www.kegg.jp/kegg-bin/show_pathway?ko00270+K08967
L8J0L8	K08967	mtnD, mtnZ, ADI1	1,2-dihydroxy-3-keto-5-methylthiopentene dioxygenase [EC:1.13.11.53 1.13.11.54]	ko01100	Metabolic pathways	http://www.kegg.jp/kegg-bin/show_pathway?ko01100+K08967
L8ICD6	K00016	LDH, ldh	L-lactate dehydrogenase [EC:1.1.1.27]	ko00010	Glycolysis / Gluconeogenesis	http://www.kegg.jp/kegg-bin/show_pathway?ko00010+K00016
L8ICD6	K00016	LDH, ldh	L-lactate dehydrogenase [EC:1.1.1.27]	ko00270	Cysteine and methionine metabolism	http://www.kegg.jp/kegg-bin/show_pathway?ko00270+K00016
L8ICD6	K00016	LDH, ldh	L-lactate dehydrogenase [EC:1.1.1.27]	ko00620	Pyruvate metabolism	http://www.kegg.jp/kegg-bin/show_pathway?ko00620+K00016
L8ICD6	K00016	LDH, ldh	L-lactate dehydrogenase [EC:1.1.1.27]	ko00640	Propanoate metabolism	http://www.kegg.jp/kegg-bin/show_pathway?ko00640+K00016
L8ICD6	K00016	LDH, ldh	L-lactate dehydrogenase [EC:1.1.1.27]	ko01100	Metabolic pathways	http://www.kegg.jp/kegg-bin/show_pathway?ko01100+K00016
L8ICD6	K00016	LDH, ldh	L-lactate dehydrogenase [EC:1.1.1.27]	ko01110	Biosynthesis of secondary metabolites	http://www.kegg.jp/kegg-bin/show_pathway?ko01110+K00016
L8ICD6	K00016	LDH, ldh	L-lactate dehydrogenase [EC:1.1.1.27]	ko01120	Microbial metabolism in diverse environments	http://www.kegg.jp/kegg-bin/show_pathway?ko01120+K00016
L8ICD6	K00016	LDH, ldh	L-lactate dehydrogenase [EC:1.1.1.27]	ko04066	HIF-1 signaling pathway	http://www.kegg.jp/kegg-bin/show_pathway?ko04066+K00016
L8ICD6	K00016	LDH, ldh	L-lactate dehydrogenase [EC:1.1.1.27]	ko04922	Glucagon signaling pathway	http://www.kegg.jp/kegg-bin/show_pathway?ko04922+K00016
L8ICD6	K00016	LDH, ldh	L-lactate dehydrogenase [EC:1.1.1.27]	ko05230	Central carbon metabolism in cancer	http://www.kegg.jp/kegg-bin/show_pathway?ko05230+K00016
L8IBZ3	K06664	PEX2, PXMP3	peroxin-2	ko04146	Peroxisome	http://www.kegg.jp/kegg-bin/show_pathway?ko04146+K06664
L8IJG9	K10750	CHAF1A	chromatin assembly factor 1 subunit A
L8IZX3	K00927	PGK, pgk	phosphoglycerate kinase [EC:2.7.2.3]	ko00010	Glycolysis / Gluconeogenesis	http://www.kegg.jp/kegg-bin/show_pathway?ko00010+K00927
L8IZX3	K00927	PGK, pgk	phosphoglycerate kinase [EC:2.7.2.3]	ko00710	Carbon fixation in photosynthetic organisms	http://www.kegg.jp/kegg-bin/show_pathway?ko00710+K00927
L8IZX3	K00927	PGK, pgk	phosphoglycerate kinase [EC:2.7.2.3]	ko01100	Metabolic pathways	http://www.kegg.jp/kegg-bin/show_pathway?ko01100+K00927
L8IZX3	K00927	PGK, pgk	phosphoglycerate kinase [EC:2.7.2.3]	ko01110	Biosynthesis of secondary metabolites	http://www.kegg.jp/kegg-bin/show_pathway?ko01110+K00927
L8IZX3	K00927	PGK, pgk	phosphoglycerate kinase [EC:2.7.2.3]	ko01120	Microbial metabolism in diverse environments	http://www.kegg.jp/kegg-bin/show_pathway?ko01120+K00927
L8IZX3	K00927	PGK, pgk	phosphoglycerate kinase [EC:2.7.2.3]	ko01200	Carbon metabolism	http://www.kegg.jp/kegg-bin/show_pathway?ko01200+K00927
L8IZX3	K00927	PGK, pgk	phosphoglycerate kinase [EC:2.7.2.3]	ko01230	Biosynthesis of amino acids	http://www.kegg.jp/kegg-bin/show_pathway?ko01230+K00927
L8IZX3	K00927	PGK, pgk	phosphoglycerate kinase [EC:2.7.2.3]	ko04066	HIF-1 signaling pathway	http://www.kegg.jp/kegg-bin/show_pathway?ko04066+K00927
L8HX06	K09821	AGT, SERPINA8	angiotensinogen	ko04072	Phospholipase D signaling pathway	http://www.kegg.jp/kegg-bin/show_pathway?ko04072+K09821
L8HX06	K09821	AGT, SERPINA8	angiotensinogen	ko04080	Neuroactive ligand-receptor interaction	http://www.kegg.jp/kegg-bin/show_pathway?ko04080+K09821
L8HX06	K09821	AGT, SERPINA8	angiotensinogen	ko04261	Adrenergic signaling in cardiomyocytes	http://www.kegg.jp/kegg-bin/show_pathway?ko04261+K09821
L8HX06	K09821	AGT, SERPINA8	angiotensinogen	ko04270	Vascular smooth muscle contraction	http://www.kegg.jp/kegg-bin/show_pathway?ko04270+K09821
L8HX06	K09821	AGT, SERPINA8	angiotensinogen	ko04614	Renin-angiotensin system	http://www.kegg.jp/kegg-bin/show_pathway?ko04614+K09821
L8HX06	K09821	AGT, SERPINA8	angiotensinogen	ko04924	Renin secretion	http://www.kegg.jp/kegg-bin/show_pathway?ko04924+K09821
L8HX06	K09821	AGT, SERPINA8	angiotensinogen	ko04925	Aldosterone synthesis and secretion	http://www.kegg.jp/kegg-bin/show_pathway?ko04925+K09821
L8HX06	K09821	AGT, SERPINA8	angiotensinogen	ko04927	Cortisol synthesis and secretion	http://www.kegg.jp/kegg-bin/show_pathway?ko04927+K09821
L8HX06	K09821	AGT, SERPINA8	angiotensinogen	ko04931	Insulin resistance	http://www.kegg.jp/kegg-bin/show_pathway?ko04931+K09821
L8HX06	K09821	AGT, SERPINA8	angiotensinogen	ko04933	AGE-RAGE signaling pathway in diabetic complications	http://www.kegg.jp/kegg-bin/show_pathway?ko04933+K09821
L8HX06	K09821	AGT, SERPINA8	angiotensinogen	ko04934	Cushing syndrome	http://www.kegg.jp/kegg-bin/show_pathway?ko04934+K09821
L8HX06	K09821	AGT, SERPINA8	angiotensinogen	ko05200	Pathways in cancer	http://www.kegg.jp/kegg-bin/show_pathway?ko05200+K09821
L8HX06	K09821	AGT, SERPINA8	angiotensinogen	ko05410	Hypertrophic cardiomyopathy	http://www.kegg.jp/kegg-bin/show_pathway?ko05410+K09821
L8HX06	K09821	AGT, SERPINA8	angiotensinogen	ko05414	Dilated cardiomyopathy	http://www.kegg.jp/kegg-bin/show_pathway?ko05414+K09821
L8HX06	K09821	AGT, SERPINA8	angiotensinogen	ko05415	Diabetic cardiomyopathy	http://www.kegg.jp/kegg-bin/show_pathway?ko05415+K09821
L8HXP8	K01803	TPI, tpiA	triosephosphate isomerase (TIM) [EC:5.3.1.1]	ko00010	Glycolysis / Gluconeogenesis	http://www.kegg.jp/kegg-bin/show_pathway?ko00010+K01803
L8HXP8	K01803	TPI, tpiA	triosephosphate isomerase (TIM) [EC:5.3.1.1]	ko00051	Fructose and mannose metabolism	http://www.kegg.jp/kegg-bin/show_pathway?ko00051+K01803
L8HXP8	K01803	TPI, tpiA	triosephosphate isomerase (TIM) [EC:5.3.1.1]	ko00562	Inositol phosphate metabolism	http://www.kegg.jp/kegg-bin/show_pathway?ko00562+K01803
L8HXP8	K01803	TPI, tpiA	triosephosphate isomerase (TIM) [EC:5.3.1.1]	ko00710	Carbon fixation in photosynthetic organisms	http://www.kegg.jp/kegg-bin/show_pathway?ko00710+K01803
L8HXP8	K01803	TPI, tpiA	triosephosphate isomerase (TIM) [EC:5.3.1.1]	ko01100	Metabolic pathways	http://www.kegg.jp/kegg-bin/show_pathway?ko01100+K01803
L8HXP8	K01803	TPI, tpiA	triosephosphate isomerase (TIM) [EC:5.3.1.1]	ko01110	Biosynthesis of secondary metabolites	http://www.kegg.jp/kegg-bin/show_pathway?ko01110+K01803
L8HXP8	K01803	TPI, tpiA	triosephosphate isomerase (TIM) [EC:5.3.1.1]	ko01120	Microbial metabolism in diverse environments	http://www.kegg.jp/kegg-bin/show_pathway?ko01120+K01803
L8HXP8	K01803	TPI, tpiA	triosephosphate isomerase (TIM) [EC:5.3.1.1]	ko01200	Carbon metabolism	http://www.kegg.jp/kegg-bin/show_pathway?ko01200+K01803
L8HXP8	K01803	TPI, tpiA	triosephosphate isomerase (TIM) [EC:5.3.1.1]	ko01230	Biosynthesis of amino acids	http://www.kegg.jp/kegg-bin/show_pathway?ko01230+K01803
L8J0P6	K01206	FUCA	alpha-L-fucosidase [EC:3.2.1.51]	ko00511	Other glycan degradation	http://www.kegg.jp/kegg-bin/show_pathway?ko00511+K01206
L8J0P6	K01206	FUCA	alpha-L-fucosidase [EC:3.2.1.51]	ko04142	Lysosome	http://www.kegg.jp/kegg-bin/show_pathway?ko04142+K01206
L8IX25	K04001	SERPING1, C1INH	C1 inhibitor	ko04610	Complement and coagulation cascades	http://www.kegg.jp/kegg-bin/show_pathway?ko04610+K04001
L8IX25	K04001	SERPING1, C1INH	C1 inhibitor	ko05133	Pertussis	http://www.kegg.jp/kegg-bin/show_pathway?ko05133+K04001
L8I9A3	K01074	PPT	palmitoyl-protein thioesterase [EC:3.1.2.22]	ko00062	Fatty acid elongation	http://www.kegg.jp/kegg-bin/show_pathway?ko00062+K01074
L8I9A3	K01074	PPT	palmitoyl-protein thioesterase [EC:3.1.2.22]	ko01100	Metabolic pathways	http://www.kegg.jp/kegg-bin/show_pathway?ko01100+K01074
L8I9A3	K01074	PPT	palmitoyl-protein thioesterase [EC:3.1.2.22]	ko01212	Fatty acid metabolism	http://www.kegg.jp/kegg-bin/show_pathway?ko01212+K01074
L8I9A3	K01074	PPT	palmitoyl-protein thioesterase [EC:3.1.2.22]	ko04142	Lysosome	http://www.kegg.jp/kegg-bin/show_pathway?ko04142+K01074
L8HQI2	K07296	ADIPOQ, ACDC	adiponectin	ko03320	PPAR signaling pathway	http://www.kegg.jp/kegg-bin/show_pathway?ko03320+K07296
L8HQI2	K07296	ADIPOQ, ACDC	adiponectin	ko04152	AMPK signaling pathway	http://www.kegg.jp/kegg-bin/show_pathway?ko04152+K07296
L8HQI2	K07296	ADIPOQ, ACDC	adiponectin	ko04211	Longevity regulating pathway	http://www.kegg.jp/kegg-bin/show_pathway?ko04211+K07296
L8HQI2	K07296	ADIPOQ, ACDC	adiponectin	ko04920	Adipocytokine signaling pathway	http://www.kegg.jp/kegg-bin/show_pathway?ko04920+K07296
L8HQI2	K07296	ADIPOQ, ACDC	adiponectin	ko04930	Type II diabetes mellitus	http://www.kegg.jp/kegg-bin/show_pathway?ko04930+K07296
L8HQI2	K07296	ADIPOQ, ACDC	adiponectin	ko04932	Non-alcoholic fatty liver disease	http://www.kegg.jp/kegg-bin/show_pathway?ko04932+K07296
L8IK42	K24514	ITIH4	inter-alpha-trypsin inhibitor heavy chain H4
L8J052	K08069	VNN	pantetheine hydrolase [EC:3.5.1.92]	ko00770	Pantothenate and CoA biosynthesis	http://www.kegg.jp/kegg-bin/show_pathway?ko00770+K08069
L8IQM1
L8IDW8	K10950	ERO1L	ERO1-like protein alpha [EC:1.8.4.-]	ko04141	Protein processing in endoplasmic reticulum	http://www.kegg.jp/kegg-bin/show_pathway?ko04141+K10950
L8IDW8	K10950	ERO1L	ERO1-like protein alpha [EC:1.8.4.-]	ko05110	Vibrio cholerae infection	http://www.kegg.jp/kegg-bin/show_pathway?ko05110+K10950
L8IDW8	K10950	ERO1L	ERO1-like protein alpha [EC:1.8.4.-]	ko05417	Lipid and atherosclerosis	http://www.kegg.jp/kegg-bin/show_pathway?ko05417+K10950
L8ILP2	K04525	SERPINA	serpin A
L8HPA3	K14678	LOXL1	lysyl oxidase-like protein 1 [EC:1.4.3.-]
L8IHJ7	K01333	CFI	complement factor I [EC:3.4.21.45]	ko04610	Complement and coagulation cascades	http://www.kegg.jp/kegg-bin/show_pathway?ko04610+K01333
L8IHJ7	K01333	CFI	complement factor I [EC:3.4.21.45]	ko05150	Staphylococcus aureus infection	http://www.kegg.jp/kegg-bin/show_pathway?ko05150+K01333
L8J332	K01444	AGA, aspG	N4-(beta-N-acetylglucosaminyl)-L-asparaginase [EC:3.5.1.26]	ko00511	Other glycan degradation	http://www.kegg.jp/kegg-bin/show_pathway?ko00511+K01444
L8J332	K01444	AGA, aspG	N4-(beta-N-acetylglucosaminyl)-L-asparaginase [EC:3.5.1.26]	ko04142	Lysosome	http://www.kegg.jp/kegg-bin/show_pathway?ko04142+K01444
L8IU68	K03911	SERPINC1, AT3	antithrombin III	ko04610	Complement and coagulation cascades	http://www.kegg.jp/kegg-bin/show_pathway?ko04610+K03911
L8J0L1	K18621	ANLN	actin-binding protein anillin
L8I793	K04500	SMAD2	mothers against decapentaplegic homolog 2	ko04110	Cell cycle	http://www.kegg.jp/kegg-bin/show_pathway?ko04110+K04500
L8I793	K04500	SMAD2	mothers against decapentaplegic homolog 2	ko04144	Endocytosis	http://www.kegg.jp/kegg-bin/show_pathway?ko04144+K04500
L8I793	K04500	SMAD2	mothers against decapentaplegic homolog 2	ko04218	Cellular senescence	http://www.kegg.jp/kegg-bin/show_pathway?ko04218+K04500
L8I793	K04500	SMAD2	mothers against decapentaplegic homolog 2	ko04350	TGF-beta signaling pathway	http://www.kegg.jp/kegg-bin/show_pathway?ko04350+K04500
L8I793	K04500	SMAD2	mothers against decapentaplegic homolog 2	ko04371	Apelin signaling pathway	http://www.kegg.jp/kegg-bin/show_pathway?ko04371+K04500
L8I793	K04500	SMAD2	mothers against decapentaplegic homolog 2	ko04390	Hippo signaling pathway	http://www.kegg.jp/kegg-bin/show_pathway?ko04390+K04500
L8I793	K04500	SMAD2	mothers against decapentaplegic homolog 2	ko04550	Signaling pathways regulating pluripotency of stem cells	http://www.kegg.jp/kegg-bin/show_pathway?ko04550+K04500
L8I793	K04500	SMAD2	mothers against decapentaplegic homolog 2	ko04659	Th17 cell differentiation	http://www.kegg.jp/kegg-bin/show_pathway?ko04659+K04500
L8I793	K04500	SMAD2	mothers against decapentaplegic homolog 2	ko04926	Relaxin signaling pathway	http://www.kegg.jp/kegg-bin/show_pathway?ko04926+K04500
L8I793	K04500	SMAD2	mothers against decapentaplegic homolog 2	ko04933	AGE-RAGE signaling pathway in diabetic complications	http://www.kegg.jp/kegg-bin/show_pathway?ko04933+K04500
L8I793	K04500	SMAD2	mothers against decapentaplegic homolog 2	ko05142	Chagas disease	http://www.kegg.jp/kegg-bin/show_pathway?ko05142+K04500
L8I793	K04500	SMAD2	mothers against decapentaplegic homolog 2	ko05166	Human T-cell leukemia virus 1 infection	http://www.kegg.jp/kegg-bin/show_pathway?ko05166+K04500
L8I793	K04500	SMAD2	mothers against decapentaplegic homolog 2	ko05200	Pathways in cancer	http://www.kegg.jp/kegg-bin/show_pathway?ko05200+K04500
L8I793	K04500	SMAD2	mothers against decapentaplegic homolog 2	ko05205	Proteoglycans in cancer	http://www.kegg.jp/kegg-bin/show_pathway?ko05205+K04500
L8I793	K04500	SMAD2	mothers against decapentaplegic homolog 2	ko05210	Colorectal cancer	http://www.kegg.jp/kegg-bin/show_pathway?ko05210+K04500
L8I793	K04500	SMAD2	mothers against decapentaplegic homolog 2	ko05212	Pancreatic cancer	http://www.kegg.jp/kegg-bin/show_pathway?ko05212+K04500
L8I793	K04500	SMAD2	mothers against decapentaplegic homolog 2	ko05225	Hepatocellular carcinoma	http://www.kegg.jp/kegg-bin/show_pathway?ko05225+K04500
L8I793	K04500	SMAD2	mothers against decapentaplegic homolog 2	ko05226	Gastric cancer	http://www.kegg.jp/kegg-bin/show_pathway?ko05226+K04500
L8I793	K04500	SMAD2	mothers against decapentaplegic homolog 2	ko05321	Inflammatory bowel disease	http://www.kegg.jp/kegg-bin/show_pathway?ko05321+K04500
L8I793	K04500	SMAD2	mothers against decapentaplegic homolog 2	ko05415	Diabetic cardiomyopathy	http://www.kegg.jp/kegg-bin/show_pathway?ko05415+K04500
L8J274	K12077	PDK1	pyruvate dehydrogenase kinase isoform 1 [EC:2.7.11.2]	ko04066	HIF-1 signaling pathway	http://www.kegg.jp/kegg-bin/show_pathway?ko04066+K12077
L8J274	K12077	PDK1	pyruvate dehydrogenase kinase isoform 1 [EC:2.7.11.2]	ko05230	Central carbon metabolism in cancer	http://www.kegg.jp/kegg-bin/show_pathway?ko05230+K12077
L8IUT8	K06825	FBN1	fibrillin 1	ko04350	TGF-beta signaling pathway	http://www.kegg.jp/kegg-bin/show_pathway?ko04350+K06825
L8IZ21	K19614	SERPINF1, PEDF	pigment epithelium-derived factor	ko04310	Wnt signaling pathway	http://www.kegg.jp/kegg-bin/show_pathway?ko04310+K19614
L8IS72	K11275	H1_5	histone H1/5
L8HNU2	K23961	EPB41L1_2_3	band 4.1-like protein 1/2/3
L8HWY2	K00844	HK	hexokinase [EC:2.7.1.1]	ko00010	Glycolysis / Gluconeogenesis	http://www.kegg.jp/kegg-bin/show_pathway?ko00010+K00844
L8HWY2	K00844	HK	hexokinase [EC:2.7.1.1]	ko00051	Fructose and mannose metabolism	http://www.kegg.jp/kegg-bin/show_pathway?ko00051+K00844
L8HWY2	K00844	HK	hexokinase [EC:2.7.1.1]	ko00052	Galactose metabolism	http://www.kegg.jp/kegg-bin/show_pathway?ko00052+K00844
L8HWY2	K00844	HK	hexokinase [EC:2.7.1.1]	ko00500	Starch and sucrose metabolism	http://www.kegg.jp/kegg-bin/show_pathway?ko00500+K00844
L8HWY2	K00844	HK	hexokinase [EC:2.7.1.1]	ko00520	Amino sugar and nucleotide sugar metabolism	http://www.kegg.jp/kegg-bin/show_pathway?ko00520+K00844
L8HWY2	K00844	HK	hexokinase [EC:2.7.1.1]	ko00521	Streptomycin biosynthesis	http://www.kegg.jp/kegg-bin/show_pathway?ko00521+K00844
L8HWY2	K00844	HK	hexokinase [EC:2.7.1.1]	ko00524	Neomycin, kanamycin and gentamicin biosynthesis	http://www.kegg.jp/kegg-bin/show_pathway?ko00524+K00844
L8HWY2	K00844	HK	hexokinase [EC:2.7.1.1]	ko01100	Metabolic pathways	http://www.kegg.jp/kegg-bin/show_pathway?ko01100+K00844
L8HWY2	K00844	HK	hexokinase [EC:2.7.1.1]	ko01110	Biosynthesis of secondary metabolites	http://www.kegg.jp/kegg-bin/show_pathway?ko01110+K00844
L8HWY2	K00844	HK	hexokinase [EC:2.7.1.1]	ko01120	Microbial metabolism in diverse environments	http://www.kegg.jp/kegg-bin/show_pathway?ko01120+K00844
L8HWY2	K00844	HK	hexokinase [EC:2.7.1.1]	ko01200	Carbon metabolism	http://www.kegg.jp/kegg-bin/show_pathway?ko01200+K00844
L8HWY2	K00844	HK	hexokinase [EC:2.7.1.1]	ko04066	HIF-1 signaling pathway	http://www.kegg.jp/kegg-bin/show_pathway?ko04066+K00844
L8HWY2	K00844	HK	hexokinase [EC:2.7.1.1]	ko04910	Insulin signaling pathway	http://www.kegg.jp/kegg-bin/show_pathway?ko04910+K00844
L8HWY2	K00844	HK	hexokinase [EC:2.7.1.1]	ko04930	Type II diabetes mellitus	http://www.kegg.jp/kegg-bin/show_pathway?ko04930+K00844
L8HWY2	K00844	HK	hexokinase [EC:2.7.1.1]	ko04973	Carbohydrate digestion and absorption	http://www.kegg.jp/kegg-bin/show_pathway?ko04973+K00844
L8HWY2	K00844	HK	hexokinase [EC:2.7.1.1]	ko05131	Shigellosis	http://www.kegg.jp/kegg-bin/show_pathway?ko05131+K00844
L8HWY2	K00844	HK	hexokinase [EC:2.7.1.1]	ko05230	Central carbon metabolism in cancer	http://www.kegg.jp/kegg-bin/show_pathway?ko05230+K00844
L8HQR6	K17300	LGALS3BP	galectin-3-binding protein
L8HPT2	K23759	S100A2	protein S100-A2
L8IMB9	K11252	H2B	histone H2B	ko04613	Neutrophil extracellular trap formation	http://www.kegg.jp/kegg-bin/show_pathway?ko04613+K11252
L8IMB9	K11252	H2B	histone H2B	ko05034	Alcoholism	http://www.kegg.jp/kegg-bin/show_pathway?ko05034+K11252
L8IMB9	K11252	H2B	histone H2B	ko05203	Viral carcinogenesis	http://www.kegg.jp/kegg-bin/show_pathway?ko05203+K11252
L8IMB9	K11252	H2B	histone H2B	ko05322	Systemic lupus erythematosus	http://www.kegg.jp/kegg-bin/show_pathway?ko05322+K11252
L8I7A3	K20690	ARHGEF25	Rho guanine nucleotide exchange factor 25
L8HW49	K14365	FHL1, SLIM1	four and a half LIM domains protein 1	ko04630	JAK-STAT signaling pathway	http://www.kegg.jp/kegg-bin/show_pathway?ko04630+K14365
L8IU59	K01292	CPN1	carboxypeptidase N catalytic subunit [EC:3.4.17.3]
L8J2E7
L8IQQ6	K17097	ANXA10	annexin A10
L8J197	K12348	ASAH1	acid ceramidase [EC:3.5.1.23]	ko00600	Sphingolipid metabolism	http://www.kegg.jp/kegg-bin/show_pathway?ko00600+K12348
L8J197	K12348	ASAH1	acid ceramidase [EC:3.5.1.23]	ko01100	Metabolic pathways	http://www.kegg.jp/kegg-bin/show_pathway?ko01100+K12348
L8J197	K12348	ASAH1	acid ceramidase [EC:3.5.1.23]	ko04071	Sphingolipid signaling pathway	http://www.kegg.jp/kegg-bin/show_pathway?ko04071+K12348
L8J197	K12348	ASAH1	acid ceramidase [EC:3.5.1.23]	ko04142	Lysosome	http://www.kegg.jp/kegg-bin/show_pathway?ko04142+K12348
L8I899	K11515	INCENP	inner centromere protein
L8J0U4	K01623	ALDO	fructose-bisphosphate aldolase, class I [EC:4.1.2.13]	ko00010	Glycolysis / Gluconeogenesis	http://www.kegg.jp/kegg-bin/show_pathway?ko00010+K01623
L8J0U4	K01623	ALDO	fructose-bisphosphate aldolase, class I [EC:4.1.2.13]	ko00030	Pentose phosphate pathway	http://www.kegg.jp/kegg-bin/show_pathway?ko00030+K01623
L8J0U4	K01623	ALDO	fructose-bisphosphate aldolase, class I [EC:4.1.2.13]	ko00051	Fructose and mannose metabolism	http://www.kegg.jp/kegg-bin/show_pathway?ko00051+K01623
L8J0U4	K01623	ALDO	fructose-bisphosphate aldolase, class I [EC:4.1.2.13]	ko00680	Methane metabolism	http://www.kegg.jp/kegg-bin/show_pathway?ko00680+K01623
L8J0U4	K01623	ALDO	fructose-bisphosphate aldolase, class I [EC:4.1.2.13]	ko00710	Carbon fixation in photosynthetic organisms	http://www.kegg.jp/kegg-bin/show_pathway?ko00710+K01623
L8J0U4	K01623	ALDO	fructose-bisphosphate aldolase, class I [EC:4.1.2.13]	ko01100	Metabolic pathways	http://www.kegg.jp/kegg-bin/show_pathway?ko01100+K01623
L8J0U4	K01623	ALDO	fructose-bisphosphate aldolase, class I [EC:4.1.2.13]	ko01110	Biosynthesis of secondary metabolites	http://www.kegg.jp/kegg-bin/show_pathway?ko01110+K01623
L8J0U4	K01623	ALDO	fructose-bisphosphate aldolase, class I [EC:4.1.2.13]	ko01120	Microbial metabolism in diverse environments	http://www.kegg.jp/kegg-bin/show_pathway?ko01120+K01623
L8J0U4	K01623	ALDO	fructose-bisphosphate aldolase, class I [EC:4.1.2.13]	ko01200	Carbon metabolism	http://www.kegg.jp/kegg-bin/show_pathway?ko01200+K01623
L8J0U4	K01623	ALDO	fructose-bisphosphate aldolase, class I [EC:4.1.2.13]	ko01230	Biosynthesis of amino acids	http://www.kegg.jp/kegg-bin/show_pathway?ko01230+K01623
L8J0U4	K01623	ALDO	fructose-bisphosphate aldolase, class I [EC:4.1.2.13]	ko04066	HIF-1 signaling pathway	http://www.kegg.jp/kegg-bin/show_pathway?ko04066+K01623
L8ICJ2	K09575	FKBP9_10	FK506-binding protein 9/10 [EC:5.2.1.8]
L8INB2	K19866	EFEMP2	EGF-containing fibulin-like extracellular matrix protein 2
L8IJS0	K11275	H1_5	histone H1/5
L8IWC2	K18262	EFEMP1, FBLN3	EGF-containing fibulin-like extracellular matrix protein 1
L8HZL7	K08110	GPC4	glypican 4	ko04310	Wnt signaling pathway	http://www.kegg.jp/kegg-bin/show_pathway?ko04310+K08110
L8IJX9	K06129	LYPLA3	lysophospholipase III [EC:3.1.1.5]	ko00564	Glycerophospholipid metabolism	http://www.kegg.jp/kegg-bin/show_pathway?ko00564+K06129
L8IJX9	K06129	LYPLA3	lysophospholipase III [EC:3.1.1.5]	ko04142	Lysosome	http://www.kegg.jp/kegg-bin/show_pathway?ko04142+K06129
L8IXR3	K10510	ZBTB38	zinc finger and BTB domain-containing protein 38
L8HMZ8
L8IGB4
L8I6G2	K23579	IGFBP6	insulin-like growth factor-binding protein 6
L8HXR1	K12959	CAV3	caveolin 3	ko04144	Endocytosis	http://www.kegg.jp/kegg-bin/show_pathway?ko04144+K12959
L8HXR1	K12959	CAV3	caveolin 3	ko04510	Focal adhesion	http://www.kegg.jp/kegg-bin/show_pathway?ko04510+K12959
L8HXR1	K12959	CAV3	caveolin 3	ko05020	Prion disease	http://www.kegg.jp/kegg-bin/show_pathway?ko05020+K12959
L8HXR1	K12959	CAV3	caveolin 3	ko05100	Bacterial invasion of epithelial cells	http://www.kegg.jp/kegg-bin/show_pathway?ko05100+K12959
L8HXR1	K12959	CAV3	caveolin 3	ko05205	Proteoglycans in cancer	http://www.kegg.jp/kegg-bin/show_pathway?ko05205+K12959
L8HXR1	K12959	CAV3	caveolin 3	ko05418	Fluid shear stress and atherosclerosis	http://www.kegg.jp/kegg-bin/show_pathway?ko05418+K12959
L8HW13
L8IHV8	K19014	ITIH1, SHAP	inter-alpha-trypsin inhibitor heavy chain H1
L8HXK3	K10352	MYH9s	myosin heavy chain 9/10/11/14	ko04270	Vascular smooth muscle contraction	http://www.kegg.jp/kegg-bin/show_pathway?ko04270+K10352
L8HXK3	K10352	MYH9s	myosin heavy chain 9/10/11/14	ko04530	Tight junction	http://www.kegg.jp/kegg-bin/show_pathway?ko04530+K10352
L8HXK3	K10352	MYH9s	myosin heavy chain 9/10/11/14	ko04810	Regulation of actin cytoskeleton	http://www.kegg.jp/kegg-bin/show_pathway?ko04810+K10352
L8HXK3	K10352	MYH9s	myosin heavy chain 9/10/11/14	ko05130	Pathogenic Escherichia coli infection	http://www.kegg.jp/kegg-bin/show_pathway?ko05130+K10352
L8I5C0	K01379	CTSD	cathepsin D [EC:3.4.23.5]	ko04071	Sphingolipid signaling pathway	http://www.kegg.jp/kegg-bin/show_pathway?ko04071+K01379
L8I5C0	K01379	CTSD	cathepsin D [EC:3.4.23.5]	ko04140	Autophagy - animal	http://www.kegg.jp/kegg-bin/show_pathway?ko04140+K01379
L8I5C0	K01379	CTSD	cathepsin D [EC:3.4.23.5]	ko04142	Lysosome	http://www.kegg.jp/kegg-bin/show_pathway?ko04142+K01379
L8I5C0	K01379	CTSD	cathepsin D [EC:3.4.23.5]	ko04210	Apoptosis	http://www.kegg.jp/kegg-bin/show_pathway?ko04210+K01379
L8I5C0	K01379	CTSD	cathepsin D [EC:3.4.23.5]	ko04915	Estrogen signaling pathway	http://www.kegg.jp/kegg-bin/show_pathway?ko04915+K01379
L8I5C0	K01379	CTSD	cathepsin D [EC:3.4.23.5]	ko05152	Tuberculosis	http://www.kegg.jp/kegg-bin/show_pathway?ko05152+K01379
L8I5C0	K01379	CTSD	cathepsin D [EC:3.4.23.5]	ko05415	Diabetic cardiomyopathy	http://www.kegg.jp/kegg-bin/show_pathway?ko05415+K01379
L8I966	K00600	glyA, SHMT	glycine hydroxymethyltransferase [EC:2.1.2.1]	ko00260	Glycine, serine and threonine metabolism	http://www.kegg.jp/kegg-bin/show_pathway?ko00260+K00600
L8I966	K00600	glyA, SHMT	glycine hydroxymethyltransferase [EC:2.1.2.1]	ko00460	Cyanoamino acid metabolism	http://www.kegg.jp/kegg-bin/show_pathway?ko00460+K00600
L8I966	K00600	glyA, SHMT	glycine hydroxymethyltransferase [EC:2.1.2.1]	ko00630	Glyoxylate and dicarboxylate metabolism	http://www.kegg.jp/kegg-bin/show_pathway?ko00630+K00600
L8I966	K00600	glyA, SHMT	glycine hydroxymethyltransferase [EC:2.1.2.1]	ko00670	One carbon pool by folate	http://www.kegg.jp/kegg-bin/show_pathway?ko00670+K00600
L8I966	K00600	glyA, SHMT	glycine hydroxymethyltransferase [EC:2.1.2.1]	ko00680	Methane metabolism	http://www.kegg.jp/kegg-bin/show_pathway?ko00680+K00600
L8I966	K00600	glyA, SHMT	glycine hydroxymethyltransferase [EC:2.1.2.1]	ko01100	Metabolic pathways	http://www.kegg.jp/kegg-bin/show_pathway?ko01100+K00600
L8I966	K00600	glyA, SHMT	glycine hydroxymethyltransferase [EC:2.1.2.1]	ko01110	Biosynthesis of secondary metabolites	http://www.kegg.jp/kegg-bin/show_pathway?ko01110+K00600
L8I966	K00600	glyA, SHMT	glycine hydroxymethyltransferase [EC:2.1.2.1]	ko01120	Microbial metabolism in diverse environments	http://www.kegg.jp/kegg-bin/show_pathway?ko01120+K00600
L8I966	K00600	glyA, SHMT	glycine hydroxymethyltransferase [EC:2.1.2.1]	ko01200	Carbon metabolism	http://www.kegg.jp/kegg-bin/show_pathway?ko01200+K00600
L8I966	K00600	glyA, SHMT	glycine hydroxymethyltransferase [EC:2.1.2.1]	ko01230	Biosynthesis of amino acids	http://www.kegg.jp/kegg-bin/show_pathway?ko01230+K00600
L8I966	K00600	glyA, SHMT	glycine hydroxymethyltransferase [EC:2.1.2.1]	ko01240	Biosynthesis of cofactors	http://www.kegg.jp/kegg-bin/show_pathway?ko01240+K00600
L8I966	K00600	glyA, SHMT	glycine hydroxymethyltransferase [EC:2.1.2.1]	ko01523	Antifolate resistance	http://www.kegg.jp/kegg-bin/show_pathway?ko01523+K00600
L8IKX5	K01052	LIPA	lysosomal acid lipase/cholesteryl ester hydrolase [EC:3.1.1.13]	ko00100	Steroid biosynthesis	http://www.kegg.jp/kegg-bin/show_pathway?ko00100+K01052
L8IKX5	K01052	LIPA	lysosomal acid lipase/cholesteryl ester hydrolase [EC:3.1.1.13]	ko04142	Lysosome	http://www.kegg.jp/kegg-bin/show_pathway?ko04142+K01052
L8IKX5	K01052	LIPA	lysosomal acid lipase/cholesteryl ester hydrolase [EC:3.1.1.13]	ko04979	Cholesterol metabolism	http://www.kegg.jp/kegg-bin/show_pathway?ko04979+K01052
L8IXW8	K05361	GPX4	phospholipid-hydroperoxide glutathione peroxidase [EC:1.11.1.12]	ko00480	Glutathione metabolism	http://www.kegg.jp/kegg-bin/show_pathway?ko00480+K05361
L8IXW8	K05361	GPX4	phospholipid-hydroperoxide glutathione peroxidase [EC:1.11.1.12]	ko01100	Metabolic pathways	http://www.kegg.jp/kegg-bin/show_pathway?ko01100+K05361
L8IXW8	K05361	GPX4	phospholipid-hydroperoxide glutathione peroxidase [EC:1.11.1.12]	ko04216	Ferroptosis	http://www.kegg.jp/kegg-bin/show_pathway?ko04216+K05361
L8HT60	K13823	HBB	hemoglobin subunit beta	ko05143	African trypanosomiasis	http://www.kegg.jp/kegg-bin/show_pathway?ko05143+K13823
L8HT60	K13823	HBB	hemoglobin subunit beta	ko05144	Malaria	http://www.kegg.jp/kegg-bin/show_pathway?ko05144+K13823
L8HW02	K01279	TPP1, CLN2	tripeptidyl-peptidase I [EC:3.4.14.9]	ko04142	Lysosome	http://www.kegg.jp/kegg-bin/show_pathway?ko04142+K01279
L8IE51
L8HZ02	K01206	FUCA	alpha-L-fucosidase [EC:3.2.1.51]	ko00511	Other glycan degradation	http://www.kegg.jp/kegg-bin/show_pathway?ko00511+K01206
L8HZ02	K01206	FUCA	alpha-L-fucosidase [EC:3.2.1.51]	ko04142	Lysosome	http://www.kegg.jp/kegg-bin/show_pathway?ko04142+K01206
L8IPN7	K00432	gpx, btuE, bsaA	glutathione peroxidase [EC:1.11.1.9]	ko00480	Glutathione metabolism	http://www.kegg.jp/kegg-bin/show_pathway?ko00480+K00432
L8IPN7	K00432	gpx, btuE, bsaA	glutathione peroxidase [EC:1.11.1.9]	ko00590	Arachidonic acid metabolism	http://www.kegg.jp/kegg-bin/show_pathway?ko00590+K00432
L8IPN7	K00432	gpx, btuE, bsaA	glutathione peroxidase [EC:1.11.1.9]	ko01100	Metabolic pathways	http://www.kegg.jp/kegg-bin/show_pathway?ko01100+K00432
L8IPN7	K00432	gpx, btuE, bsaA	glutathione peroxidase [EC:1.11.1.9]	ko04918	Thyroid hormone synthesis	http://www.kegg.jp/kegg-bin/show_pathway?ko04918+K00432
L8IPN7	K00432	gpx, btuE, bsaA	glutathione peroxidase [EC:1.11.1.9]	ko05014	Amyotrophic lateral sclerosis	http://www.kegg.jp/kegg-bin/show_pathway?ko05014+K00432
L8IPN7	K00432	gpx, btuE, bsaA	glutathione peroxidase [EC:1.11.1.9]	ko05016	Huntington disease	http://www.kegg.jp/kegg-bin/show_pathway?ko05016+K00432
L8IPN7	K00432	gpx, btuE, bsaA	glutathione peroxidase [EC:1.11.1.9]	ko05022	Pathways of neurodegeneration - multiple diseases	http://www.kegg.jp/kegg-bin/show_pathway?ko05022+K00432
L8IBA7	K12373	HEXA_B	hexosaminidase [EC:3.2.1.52]	ko00511	Other glycan degradation	http://www.kegg.jp/kegg-bin/show_pathway?ko00511+K12373
L8IBA7	K12373	HEXA_B	hexosaminidase [EC:3.2.1.52]	ko00513	Various types of N-glycan biosynthesis	http://www.kegg.jp/kegg-bin/show_pathway?ko00513+K12373
L8IBA7	K12373	HEXA_B	hexosaminidase [EC:3.2.1.52]	ko00520	Amino sugar and nucleotide sugar metabolism	http://www.kegg.jp/kegg-bin/show_pathway?ko00520+K12373
L8IBA7	K12373	HEXA_B	hexosaminidase [EC:3.2.1.52]	ko00531	Glycosaminoglycan degradation	http://www.kegg.jp/kegg-bin/show_pathway?ko00531+K12373
L8IBA7	K12373	HEXA_B	hexosaminidase [EC:3.2.1.52]	ko00603	Glycosphingolipid biosynthesis - globo and isoglobo series	http://www.kegg.jp/kegg-bin/show_pathway?ko00603+K12373
L8IBA7	K12373	HEXA_B	hexosaminidase [EC:3.2.1.52]	ko00604	Glycosphingolipid biosynthesis - ganglio series	http://www.kegg.jp/kegg-bin/show_pathway?ko00604+K12373
L8IBA7	K12373	HEXA_B	hexosaminidase [EC:3.2.1.52]	ko01100	Metabolic pathways	http://www.kegg.jp/kegg-bin/show_pathway?ko01100+K12373
L8IBA7	K12373	HEXA_B	hexosaminidase [EC:3.2.1.52]	ko04142	Lysosome	http://www.kegg.jp/kegg-bin/show_pathway?ko04142+K12373
L8IIF1	K03985	PLAUR, CD87	plasminogen activator, urokinase receptor	ko04610	Complement and coagulation cascades	http://www.kegg.jp/kegg-bin/show_pathway?ko04610+K03985
L8IIF1	K03985	PLAUR, CD87	plasminogen activator, urokinase receptor	ko05205	Proteoglycans in cancer	http://www.kegg.jp/kegg-bin/show_pathway?ko05205+K03985
L8J067	K24523	CPNE5_8_9	copine 5/8/9
L8I3R4	K00476	ASPH	aspartate beta-hydroxylase [EC:1.14.11.16]	ko04020	Calcium signaling pathway	http://www.kegg.jp/kegg-bin/show_pathway?ko04020+K00476
L8I3R4	K00476	ASPH	aspartate beta-hydroxylase [EC:1.14.11.16]	ko04260	Cardiac muscle contraction	http://www.kegg.jp/kegg-bin/show_pathway?ko04260+K00476
L8II96	K04525	SERPINA	serpin A
L8ISB9	K18615	RCSD1, CAPZIP	CapZ-interacting protein
L8HRM3	K23167	VAT1	synaptic vesicle membrane protein VAT-1
L8II04
L8HRD1	K22038	LRRC8	volume-regulated anion channel
L8HWB6	K07897	RAB7A	Ras-related protein Rab-7A	ko04137	Mitophagy - animal	http://www.kegg.jp/kegg-bin/show_pathway?ko04137+K07897
L8HWB6	K07897	RAB7A	Ras-related protein Rab-7A	ko04138	Autophagy - yeast	http://www.kegg.jp/kegg-bin/show_pathway?ko04138+K07897
L8HWB6	K07897	RAB7A	Ras-related protein Rab-7A	ko04140	Autophagy - animal	http://www.kegg.jp/kegg-bin/show_pathway?ko04140+K07897
L8HWB6	K07897	RAB7A	Ras-related protein Rab-7A	ko04144	Endocytosis	http://www.kegg.jp/kegg-bin/show_pathway?ko04144+K07897
L8HWB6	K07897	RAB7A	Ras-related protein Rab-7A	ko04145	Phagosome	http://www.kegg.jp/kegg-bin/show_pathway?ko04145+K07897
L8HWB6	K07897	RAB7A	Ras-related protein Rab-7A	ko05132	Salmonella infection	http://www.kegg.jp/kegg-bin/show_pathway?ko05132+K07897
L8HWB6	K07897	RAB7A	Ras-related protein Rab-7A	ko05146	Amoebiasis	http://www.kegg.jp/kegg-bin/show_pathway?ko05146+K07897
L8HWB6	K07897	RAB7A	Ras-related protein Rab-7A	ko05152	Tuberculosis	http://www.kegg.jp/kegg-bin/show_pathway?ko05152+K07897
L8IJ35	K08147	SLC2A10, GLUT10	MFS transporter, SP family, solute carrier family 2 (facilitated glucose transporter), member 10
L8HXL7	K15692	RNF13, RZF	E3 ubiquitin-protein ligase RNF13 [EC:2.3.2.27]
L8II73	K22291	STARD3	StAR-related lipid transfer protein 3	ko04979	Cholesterol metabolism	http://www.kegg.jp/kegg-bin/show_pathway?ko04979+K22291
L8I3S5	K10456	KLHL19, KEAP1, INRF2	kelch-like protein 19	ko04120	Ubiquitin mediated proteolysis	http://www.kegg.jp/kegg-bin/show_pathway?ko04120+K10456
L8I3S5	K10456	KLHL19, KEAP1, INRF2	kelch-like protein 19	ko05200	Pathways in cancer	http://www.kegg.jp/kegg-bin/show_pathway?ko05200+K10456
L8I3S5	K10456	KLHL19, KEAP1, INRF2	kelch-like protein 19	ko05225	Hepatocellular carcinoma	http://www.kegg.jp/kegg-bin/show_pathway?ko05225+K10456
L8I3S5	K10456	KLHL19, KEAP1, INRF2	kelch-like protein 19	ko05418	Fluid shear stress and atherosclerosis	http://www.kegg.jp/kegg-bin/show_pathway?ko05418+K10456
L8J5Y3	K23609	C9ORF72	guanine nucleotide exchange protein C9orf72	ko04140	Autophagy - animal	http://www.kegg.jp/kegg-bin/show_pathway?ko04140+K23609
L8J5Y3	K23609	C9ORF72	guanine nucleotide exchange protein C9orf72	ko05014	Amyotrophic lateral sclerosis	http://www.kegg.jp/kegg-bin/show_pathway?ko05014+K23609
L8J5Y3	K23609	C9ORF72	guanine nucleotide exchange protein C9orf72	ko05022	Pathways of neurodegeneration - multiple diseases	http://www.kegg.jp/kegg-bin/show_pathway?ko05022+K23609
L8I2E4	K06519	SLC3A2, MDU1, CD98	solute carrier family 3, member 2	ko04150	mTOR signaling pathway	http://www.kegg.jp/kegg-bin/show_pathway?ko04150+K06519
L8I2E4	K06519	SLC3A2, MDU1, CD98	solute carrier family 3, member 2	ko04216	Ferroptosis	http://www.kegg.jp/kegg-bin/show_pathway?ko04216+K06519
L8I2E4	K06519	SLC3A2, MDU1, CD98	solute carrier family 3, member 2	ko04974	Protein digestion and absorption	http://www.kegg.jp/kegg-bin/show_pathway?ko04974+K06519
L8HWS9	K01062	PLA2G7, PAFAH	platelet-activating factor acetylhydrolase [EC:3.1.1.47]	ko00565	Ether lipid metabolism	http://www.kegg.jp/kegg-bin/show_pathway?ko00565+K01062
L8HWS9	K01062	PLA2G7, PAFAH	platelet-activating factor acetylhydrolase [EC:3.1.1.47]	ko01100	Metabolic pathways	http://www.kegg.jp/kegg-bin/show_pathway?ko01100+K01062
L8I7Z4	K17780	TIM8	mitochondrial import inner membrane translocase subunit TIM8
L8I1W1	K09054	ATF6A	cyclic AMP-dependent transcription factor ATF-6 alpha	ko04141	Protein processing in endoplasmic reticulum	http://www.kegg.jp/kegg-bin/show_pathway?ko04141+K09054
L8I1W1	K09054	ATF6A	cyclic AMP-dependent transcription factor ATF-6 alpha	ko05010	Alzheimer disease	http://www.kegg.jp/kegg-bin/show_pathway?ko05010+K09054
L8I1W1	K09054	ATF6A	cyclic AMP-dependent transcription factor ATF-6 alpha	ko05012	Parkinson disease	http://www.kegg.jp/kegg-bin/show_pathway?ko05012+K09054
L8I1W1	K09054	ATF6A	cyclic AMP-dependent transcription factor ATF-6 alpha	ko05014	Amyotrophic lateral sclerosis	http://www.kegg.jp/kegg-bin/show_pathway?ko05014+K09054
L8I1W1	K09054	ATF6A	cyclic AMP-dependent transcription factor ATF-6 alpha	ko05022	Pathways of neurodegeneration - multiple diseases	http://www.kegg.jp/kegg-bin/show_pathway?ko05022+K09054
L8I1W1	K09054	ATF6A	cyclic AMP-dependent transcription factor ATF-6 alpha	ko05417	Lipid and atherosclerosis	http://www.kegg.jp/kegg-bin/show_pathway?ko05417+K09054
L8J1K1	K17686	copA, ctpA, ATP7	P-type Cu+ transporter [EC:7.2.2.8]	ko01524	Platinum drug resistance	http://www.kegg.jp/kegg-bin/show_pathway?ko01524+K17686
L8J1K1	K17686	copA, ctpA, ATP7	P-type Cu+ transporter [EC:7.2.2.8]	ko04016	MAPK signaling pathway - plant	http://www.kegg.jp/kegg-bin/show_pathway?ko04016+K17686
L8J1K1	K17686	copA, ctpA, ATP7	P-type Cu+ transporter [EC:7.2.2.8]	ko04978	Mineral absorption	http://www.kegg.jp/kegg-bin/show_pathway?ko04978+K17686
L8HSA3	K14709	SLC39A1_2_3, ZIP1_2_3	solute carrier family 39 (zinc transporter), member 1/2/3
L8I944	K15032	MTERFD	mTERF domain-containing protein, mitochondrial
L8I6J8	K13863	SLC7A1, ATRC1	solute carrier family 7 (cationic amino acid transporter), member 1	ko05206	MicroRNAs in cancer	http://www.kegg.jp/kegg-bin/show_pathway?ko05206+K13863
L8IEB1	K16639	LACTB2	endoribonuclease LACTB2 [EC:3.1.27.-]
L8IUU5	K00019	E1.1.1.30, bdh	3-hydroxybutyrate dehydrogenase [EC:1.1.1.30]	ko00072	Synthesis and degradation of ketone bodies	http://www.kegg.jp/kegg-bin/show_pathway?ko00072+K00019
L8IUU5	K00019	E1.1.1.30, bdh	3-hydroxybutyrate dehydrogenase [EC:1.1.1.30]	ko00650	Butanoate metabolism	http://www.kegg.jp/kegg-bin/show_pathway?ko00650+K00019
L8IUU5	K00019	E1.1.1.30, bdh	3-hydroxybutyrate dehydrogenase [EC:1.1.1.30]	ko01100	Metabolic pathways	http://www.kegg.jp/kegg-bin/show_pathway?ko01100+K00019
L8I612	K03902	F5	coagulation factor V (labile factor)	ko04610	Complement and coagulation cascades	http://www.kegg.jp/kegg-bin/show_pathway?ko04610+K03902
L8IHP9	K06781	CADM1, IGSF4, NECL2, TSLC1	cell adhesion molecule 1	ko04514	Cell adhesion molecules	http://www.kegg.jp/kegg-bin/show_pathway?ko04514+K06781
L8I9I2	K09542	CRYAB	crystallin, alpha B	ko04141	Protein processing in endoplasmic reticulum	http://www.kegg.jp/kegg-bin/show_pathway?ko04141+K09542
L8I9I2	K09542	CRYAB	crystallin, alpha B	ko04213	Longevity regulating pathway - multiple species	http://www.kegg.jp/kegg-bin/show_pathway?ko04213+K09542
L8HW79	K05634	PRNP, PrP, CD230	prion protein	ko04216	Ferroptosis	http://www.kegg.jp/kegg-bin/show_pathway?ko04216+K05634
L8HW79	K05634	PRNP, PrP, CD230	prion protein	ko05020	Prion disease	http://www.kegg.jp/kegg-bin/show_pathway?ko05020+K05634
L8HW79	K05634	PRNP, PrP, CD230	prion protein	ko05022	Pathways of neurodegeneration - multiple diseases	http://www.kegg.jp/kegg-bin/show_pathway?ko05022+K05634
L8HPM7
L8IPF6	K21096	CCL26	C-C motif chemokine 26	ko04060	Cytokine-cytokine receptor interaction	http://www.kegg.jp/kegg-bin/show_pathway?ko04060+K21096
L8IPF6	K21096	CCL26	C-C motif chemokine 26	ko04061	Viral protein interaction with cytokine and cytokine receptor	http://www.kegg.jp/kegg-bin/show_pathway?ko04061+K21096
L8IPF6	K21096	CCL26	C-C motif chemokine 26	ko04062	Chemokine signaling pathway	http://www.kegg.jp/kegg-bin/show_pathway?ko04062+K21096
L8HND5	K05658	ABCB1, CD243	ATP-binding cassette, subfamily B (MDR/TAP), member 1 [EC:7.6.2.2]	ko02010	ABC transporters	http://www.kegg.jp/kegg-bin/show_pathway?ko02010+K05658
L8HND5	K05658	ABCB1, CD243	ATP-binding cassette, subfamily B (MDR/TAP), member 1 [EC:7.6.2.2]	ko04976	Bile secretion	http://www.kegg.jp/kegg-bin/show_pathway?ko04976+K05658
L8HND5	K05658	ABCB1, CD243	ATP-binding cassette, subfamily B (MDR/TAP), member 1 [EC:7.6.2.2]	ko05206	MicroRNAs in cancer	http://www.kegg.jp/kegg-bin/show_pathway?ko05206+K05658
L8HND5	K05658	ABCB1, CD243	ATP-binding cassette, subfamily B (MDR/TAP), member 1 [EC:7.6.2.2]	ko05226	Gastric cancer	http://www.kegg.jp/kegg-bin/show_pathway?ko05226+K05658
L8I2V5	K06614	SIAT8D	alpha-N-acetyl-neuraminate alpha-2,8-sialyltransferase (sialyltransferase 8D) [EC:2.4.99.-]
L8IBF6	K23893	LHFPL	LHFPL tetraspan subfamily member protein
L8HUW1
L8I018	K07937	ARF1_2	ADP-ribosylation factor 1/2	ko04072	Phospholipase D signaling pathway	http://www.kegg.jp/kegg-bin/show_pathway?ko04072+K07937
L8I018	K07937	ARF1_2	ADP-ribosylation factor 1/2	ko04144	Endocytosis	http://www.kegg.jp/kegg-bin/show_pathway?ko04144+K07937
L8I018	K07937	ARF1_2	ADP-ribosylation factor 1/2	ko05110	Vibrio cholerae infection	http://www.kegg.jp/kegg-bin/show_pathway?ko05110+K07937
L8I018	K07937	ARF1_2	ADP-ribosylation factor 1/2	ko05130	Pathogenic Escherichia coli infection	http://www.kegg.jp/kegg-bin/show_pathway?ko05130+K07937
L8I018	K07937	ARF1_2	ADP-ribosylation factor 1/2	ko05131	Shigellosis	http://www.kegg.jp/kegg-bin/show_pathway?ko05131+K07937
L8I018	K07937	ARF1_2	ADP-ribosylation factor 1/2	ko05132	Salmonella infection	http://www.kegg.jp/kegg-bin/show_pathway?ko05132+K07937
L8I018	K07937	ARF1_2	ADP-ribosylation factor 1/2	ko05134	Legionellosis	http://www.kegg.jp/kegg-bin/show_pathway?ko05134+K07937
L8IAB5	K08342	ATG4	cysteine protease ATG4 [EC:3.4.22.-]	ko04136	Autophagy - other	http://www.kegg.jp/kegg-bin/show_pathway?ko04136+K08342
L8IAB5	K08342	ATG4	cysteine protease ATG4 [EC:3.4.22.-]	ko04138	Autophagy - yeast	http://www.kegg.jp/kegg-bin/show_pathway?ko04138+K08342
L8IAB5	K08342	ATG4	cysteine protease ATG4 [EC:3.4.22.-]	ko04140	Autophagy - animal	http://www.kegg.jp/kegg-bin/show_pathway?ko04140+K08342
L8IT79	K17306	ARMC1	armadillo repeat-containing protein 1
L8IEH4
L8J1X3	K07748	NSDHL, ERG26	sterol-4alpha-carboxylate 3-dehydrogenase (decarboxylating) [EC:1.1.1.170]	ko00100	Steroid biosynthesis	http://www.kegg.jp/kegg-bin/show_pathway?ko00100+K07748
L8J1X3	K07748	NSDHL, ERG26	sterol-4alpha-carboxylate 3-dehydrogenase (decarboxylating) [EC:1.1.1.170]	ko01100	Metabolic pathways	http://www.kegg.jp/kegg-bin/show_pathway?ko01100+K07748
L8J1X3	K07748	NSDHL, ERG26	sterol-4alpha-carboxylate 3-dehydrogenase (decarboxylating) [EC:1.1.1.170]	ko01110	Biosynthesis of secondary metabolites	http://www.kegg.jp/kegg-bin/show_pathway?ko01110+K07748
L8IT07	K17778	TIM10	mitochondrial import inner membrane translocase subunit TIM10
L8J1S2	K23857	PLEKHB	pleckstrin homology domain-containing family B
L8IMS7	K05402	TOLLIP	toll-interacting protein	ko04620	Toll-like receptor signaling pathway	http://www.kegg.jp/kegg-bin/show_pathway?ko04620+K05402
L8I491	K14990	SLC38A1, SNAT1, GLNT	solute carrier family 38 (sodium-coupled neutral amino acid transporter), member 1	ko04724	Glutamatergic synapse	http://www.kegg.jp/kegg-bin/show_pathway?ko04724+K14990
L8I491	K14990	SLC38A1, SNAT1, GLNT	solute carrier family 38 (sodium-coupled neutral amino acid transporter), member 1	ko04727	GABAergic synapse	http://www.kegg.jp/kegg-bin/show_pathway?ko04727+K14990
L8HMB1	K08118	BGN	biglycan
L8IQ44	K24332	ATRN	attractin
L8IGV0	K04153	HTR1	5-hydroxytryptamine receptor 1	ko04024	cAMP signaling pathway	http://www.kegg.jp/kegg-bin/show_pathway?ko04024+K04153
L8IGV0	K04153	HTR1	5-hydroxytryptamine receptor 1	ko04080	Neuroactive ligand-receptor interaction	http://www.kegg.jp/kegg-bin/show_pathway?ko04080+K04153
L8IGV0	K04153	HTR1	5-hydroxytryptamine receptor 1	ko04726	Serotonergic synapse	http://www.kegg.jp/kegg-bin/show_pathway?ko04726+K04153
L8IGV0	K04153	HTR1	5-hydroxytryptamine receptor 1	ko04742	Taste transduction	http://www.kegg.jp/kegg-bin/show_pathway?ko04742+K04153
L8IDL8
L8IGX7	K03783	punA, PNP	purine-nucleoside phosphorylase [EC:2.4.2.1]	ko00230	Purine metabolism	http://www.kegg.jp/kegg-bin/show_pathway?ko00230+K03783
L8IGX7	K03783	punA, PNP	purine-nucleoside phosphorylase [EC:2.4.2.1]	ko00240	Pyrimidine metabolism	http://www.kegg.jp/kegg-bin/show_pathway?ko00240+K03783
L8IGX7	K03783	punA, PNP	purine-nucleoside phosphorylase [EC:2.4.2.1]	ko00760	Nicotinate and nicotinamide metabolism	http://www.kegg.jp/kegg-bin/show_pathway?ko00760+K03783
L8IGX7	K03783	punA, PNP	purine-nucleoside phosphorylase [EC:2.4.2.1]	ko01100	Metabolic pathways	http://www.kegg.jp/kegg-bin/show_pathway?ko01100+K03783
L8IGX7	K03783	punA, PNP	purine-nucleoside phosphorylase [EC:2.4.2.1]	ko01110	Biosynthesis of secondary metabolites	http://www.kegg.jp/kegg-bin/show_pathway?ko01110+K03783
L8J0I1	K19514	ATP6AP2, PRR	renin receptor	ko04614	Renin-angiotensin system	http://www.kegg.jp/kegg-bin/show_pathway?ko04614+K19514
L8IGL8	K06836	ADAM15	disintegrin and metalloproteinase domain-containing protein 15 [EC:3.4.24.-]
L8I0B0	K19946	OPTN, FIP2	optineurin	ko04137	Mitophagy - animal	http://www.kegg.jp/kegg-bin/show_pathway?ko04137+K19946
L8I0B0	K19946	OPTN, FIP2	optineurin	ko05014	Amyotrophic lateral sclerosis	http://www.kegg.jp/kegg-bin/show_pathway?ko05014+K19946
L8I0B0	K19946	OPTN, FIP2	optineurin	ko05022	Pathways of neurodegeneration - multiple diseases	http://www.kegg.jp/kegg-bin/show_pathway?ko05022+K19946
L8IJN1	K08753	FABP4, aP2	fatty acid-binding protein 4, adipocyte	ko03320	PPAR signaling pathway	http://www.kegg.jp/kegg-bin/show_pathway?ko03320+K08753
L8IJN1	K08753	FABP4, aP2	fatty acid-binding protein 4, adipocyte	ko04923	Regulation of lipolysis in adipocytes	http://www.kegg.jp/kegg-bin/show_pathway?ko04923+K08753
L8IDK5	K00787	FDPS	farnesyl diphosphate synthase [EC:2.5.1.1 2.5.1.10]	ko00900	Terpenoid backbone biosynthesis	http://www.kegg.jp/kegg-bin/show_pathway?ko00900+K00787
L8IDK5	K00787	FDPS	farnesyl diphosphate synthase [EC:2.5.1.1 2.5.1.10]	ko01100	Metabolic pathways	http://www.kegg.jp/kegg-bin/show_pathway?ko01100+K00787
L8IDK5	K00787	FDPS	farnesyl diphosphate synthase [EC:2.5.1.1 2.5.1.10]	ko01110	Biosynthesis of secondary metabolites	http://www.kegg.jp/kegg-bin/show_pathway?ko01110+K00787
L8IDK5	K00787	FDPS	farnesyl diphosphate synthase [EC:2.5.1.1 2.5.1.10]	ko05164	Influenza A	http://www.kegg.jp/kegg-bin/show_pathway?ko05164+K00787
L8IDK5	K00787	FDPS	farnesyl diphosphate synthase [EC:2.5.1.1 2.5.1.10]	ko05166	Human T-cell leukemia virus 1 infection	http://www.kegg.jp/kegg-bin/show_pathway?ko05166+K00787
L8IAA7	K00280	LOXL2_3_4	lysyl oxidase-like protein 2/3/4 [EC:1.4.3.-]
L8HQ26	K08617	ADAMTS1	a disintegrin and metalloproteinase with thrombospondin motifs 1 [EC:3.4.24.-]
L8IEC9
L8ISM0
L8IGD5	K15042	KPNA5_6	importin subunit alpha-6/7	ko05164	Influenza A	http://www.kegg.jp/kegg-bin/show_pathway?ko05164+K15042
L8ISD0
L8IR50
L8IV54	K08468	GPRC5A	G protein-coupled receptor family C group 5 member A
L8IJW9	K06537	CD151, TSPAN24	CD151 antigen
L8IB79	K06689	UBE2D, UBC4, UBC5	ubiquitin-conjugating enzyme E2 D [EC:2.3.2.23]	ko04013	MAPK signaling pathway - fly	http://www.kegg.jp/kegg-bin/show_pathway?ko04013+K06689
L8IB79	K06689	UBE2D, UBC4, UBC5	ubiquitin-conjugating enzyme E2 D [EC:2.3.2.23]	ko04120	Ubiquitin mediated proteolysis	http://www.kegg.jp/kegg-bin/show_pathway?ko04120+K06689
L8IB79	K06689	UBE2D, UBC4, UBC5	ubiquitin-conjugating enzyme E2 D [EC:2.3.2.23]	ko04141	Protein processing in endoplasmic reticulum	http://www.kegg.jp/kegg-bin/show_pathway?ko04141+K06689
L8IB79	K06689	UBE2D, UBC4, UBC5	ubiquitin-conjugating enzyme E2 D [EC:2.3.2.23]	ko04624	Toll and Imd signaling pathway	http://www.kegg.jp/kegg-bin/show_pathway?ko04624+K06689
L8IB79	K06689	UBE2D, UBC4, UBC5	ubiquitin-conjugating enzyme E2 D [EC:2.3.2.23]	ko05131	Shigellosis	http://www.kegg.jp/kegg-bin/show_pathway?ko05131+K06689
L8IPP8
L8I9H6	K03141	TFIIH1, GTF2H1, TFB1	transcription initiation factor TFIIH subunit 1	ko03022	Basal transcription factors	http://www.kegg.jp/kegg-bin/show_pathway?ko03022+K03141
L8I9H6	K03141	TFIIH1, GTF2H1, TFB1	transcription initiation factor TFIIH subunit 1	ko03420	Nucleotide excision repair	http://www.kegg.jp/kegg-bin/show_pathway?ko03420+K03141
L8I9H6	K03141	TFIIH1, GTF2H1, TFB1	transcription initiation factor TFIIH subunit 1	ko05203	Viral carcinogenesis	http://www.kegg.jp/kegg-bin/show_pathway?ko05203+K03141
L8I6V6	K03783	punA, PNP	purine-nucleoside phosphorylase [EC:2.4.2.1]	ko00230	Purine metabolism	http://www.kegg.jp/kegg-bin/show_pathway?ko00230+K03783
L8I6V6	K03783	punA, PNP	purine-nucleoside phosphorylase [EC:2.4.2.1]	ko00240	Pyrimidine metabolism	http://www.kegg.jp/kegg-bin/show_pathway?ko00240+K03783
L8I6V6	K03783	punA, PNP	purine-nucleoside phosphorylase [EC:2.4.2.1]	ko00760	Nicotinate and nicotinamide metabolism	http://www.kegg.jp/kegg-bin/show_pathway?ko00760+K03783
L8I6V6	K03783	punA, PNP	purine-nucleoside phosphorylase [EC:2.4.2.1]	ko01100	Metabolic pathways	http://www.kegg.jp/kegg-bin/show_pathway?ko01100+K03783
L8I6V6	K03783	punA, PNP	purine-nucleoside phosphorylase [EC:2.4.2.1]	ko01110	Biosynthesis of secondary metabolites	http://www.kegg.jp/kegg-bin/show_pathway?ko01110+K03783
L8IPA4	K16339	THEM4, CTMP	acyl-coenzyme A thioesterase THEM4 [EC:3.1.2.2]	ko00062	Fatty acid elongation	http://www.kegg.jp/kegg-bin/show_pathway?ko00062+K16339
L8IPA4	K16339	THEM4, CTMP	acyl-coenzyme A thioesterase THEM4 [EC:3.1.2.2]	ko01110	Biosynthesis of secondary metabolites	http://www.kegg.jp/kegg-bin/show_pathway?ko01110+K16339
L8IPA4	K16339	THEM4, CTMP	acyl-coenzyme A thioesterase THEM4 [EC:3.1.2.2]	ko04151	PI3K-Akt signaling pathway	http://www.kegg.jp/kegg-bin/show_pathway?ko04151+K16339
L8ICV2
L8ISR7
L8J2M2	K04661	FST	follistatin	ko04350	TGF-beta signaling pathway	http://www.kegg.jp/kegg-bin/show_pathway?ko04350+K04661
L8IKN2	K06108	RAB3B	Ras-related protein Rab-3B
L8IAH1	K02152	ATPeV1G, ATP6G	V-type H+-transporting ATPase subunit G	ko00190	Oxidative phosphorylation	http://www.kegg.jp/kegg-bin/show_pathway?ko00190+K02152
L8IAH1	K02152	ATPeV1G, ATP6G	V-type H+-transporting ATPase subunit G	ko01100	Metabolic pathways	http://www.kegg.jp/kegg-bin/show_pathway?ko01100+K02152
L8IAH1	K02152	ATPeV1G, ATP6G	V-type H+-transporting ATPase subunit G	ko04145	Phagosome	http://www.kegg.jp/kegg-bin/show_pathway?ko04145+K02152
L8IAH1	K02152	ATPeV1G, ATP6G	V-type H+-transporting ATPase subunit G	ko04150	mTOR signaling pathway	http://www.kegg.jp/kegg-bin/show_pathway?ko04150+K02152
L8IAH1	K02152	ATPeV1G, ATP6G	V-type H+-transporting ATPase subunit G	ko04721	Synaptic vesicle cycle	http://www.kegg.jp/kegg-bin/show_pathway?ko04721+K02152
L8IAH1	K02152	ATPeV1G, ATP6G	V-type H+-transporting ATPase subunit G	ko04966	Collecting duct acid secretion	http://www.kegg.jp/kegg-bin/show_pathway?ko04966+K02152
L8IAH1	K02152	ATPeV1G, ATP6G	V-type H+-transporting ATPase subunit G	ko05110	Vibrio cholerae infection	http://www.kegg.jp/kegg-bin/show_pathway?ko05110+K02152
L8IAH1	K02152	ATPeV1G, ATP6G	V-type H+-transporting ATPase subunit G	ko05120	Epithelial cell signaling in Helicobacter pylori infection	http://www.kegg.jp/kegg-bin/show_pathway?ko05120+K02152
L8IAH1	K02152	ATPeV1G, ATP6G	V-type H+-transporting ATPase subunit G	ko05165	Human papillomavirus infection	http://www.kegg.jp/kegg-bin/show_pathway?ko05165+K02152
L8IAH1	K02152	ATPeV1G, ATP6G	V-type H+-transporting ATPase subunit G	ko05323	Rheumatoid arthritis	http://www.kegg.jp/kegg-bin/show_pathway?ko05323+K02152
L8IM79
L8IDE2
L8IN10	K05615	SLC1A4, SATT	solute carrier family 1 (neutral amino acid transporter), member 4
L8HNI0	K07369	MALT1	mucosa-associated lymphoid tissue lymphoma translocation protein 1 [EC:3.4.22.-]	ko04064	NF-kappa B signaling pathway	http://www.kegg.jp/kegg-bin/show_pathway?ko04064+K07369
L8HNI0	K07369	MALT1	mucosa-associated lymphoid tissue lymphoma translocation protein 1 [EC:3.4.22.-]	ko04625	C-type lectin receptor signaling pathway	http://www.kegg.jp/kegg-bin/show_pathway?ko04625+K07369
L8HNI0	K07369	MALT1	mucosa-associated lymphoid tissue lymphoma translocation protein 1 [EC:3.4.22.-]	ko04660	T cell receptor signaling pathway	http://www.kegg.jp/kegg-bin/show_pathway?ko04660+K07369
L8HNI0	K07369	MALT1	mucosa-associated lymphoid tissue lymphoma translocation protein 1 [EC:3.4.22.-]	ko04662	B cell receptor signaling pathway	http://www.kegg.jp/kegg-bin/show_pathway?ko04662+K07369
L8HNI0	K07369	MALT1	mucosa-associated lymphoid tissue lymphoma translocation protein 1 [EC:3.4.22.-]	ko05131	Shigellosis	http://www.kegg.jp/kegg-bin/show_pathway?ko05131+K07369
L8HNI0	K07369	MALT1	mucosa-associated lymphoid tissue lymphoma translocation protein 1 [EC:3.4.22.-]	ko05152	Tuberculosis	http://www.kegg.jp/kegg-bin/show_pathway?ko05152+K07369
L8IVX7	K08512	VAMP8	vesicle-associated membrane protein 8	ko04130	SNARE interactions in vesicular transport	http://www.kegg.jp/kegg-bin/show_pathway?ko04130+K08512
L8IVX7	K08512	VAMP8	vesicle-associated membrane protein 8	ko04140	Autophagy - animal	http://www.kegg.jp/kegg-bin/show_pathway?ko04140+K08512
L8IVX7	K08512	VAMP8	vesicle-associated membrane protein 8	ko04611	Platelet activation	http://www.kegg.jp/kegg-bin/show_pathway?ko04611+K08512
L8I493
L8HL45	K23934	AHNAK	neuroblast differentiation-associated protein AHNAK	ko05132	Salmonella infection	http://www.kegg.jp/kegg-bin/show_pathway?ko05132+K23934
L8IAC6
L8HRF0
L8I870	K05616	SLC1A5	solute carrier family 1 (neutral amino acid transporter), member 5	ko04974	Protein digestion and absorption	http://www.kegg.jp/kegg-bin/show_pathway?ko04974+K05616
L8I870	K05616	SLC1A5	solute carrier family 1 (neutral amino acid transporter), member 5	ko05230	Central carbon metabolism in cancer	http://www.kegg.jp/kegg-bin/show_pathway?ko05230+K05616
L8IIM8	L8IIM8
L8J595	K05450	PDGFC_D	platelet derived growth factor C/D	ko01521	EGFR tyrosine kinase inhibitor resistance	http://www.kegg.jp/kegg-bin/show_pathway?ko01521+K05450
L8J595	K05450	PDGFC_D	platelet derived growth factor C/D	ko04010	MAPK signaling pathway	http://www.kegg.jp/kegg-bin/show_pathway?ko04010+K05450
L8J595	K05450	PDGFC_D	platelet derived growth factor C/D	ko04014	Ras signaling pathway	http://www.kegg.jp/kegg-bin/show_pathway?ko04014+K05450
L8J595	K05450	PDGFC_D	platelet derived growth factor C/D	ko04015	Rap1 signaling pathway	http://www.kegg.jp/kegg-bin/show_pathway?ko04015+K05450
L8J595	K05450	PDGFC_D	platelet derived growth factor C/D	ko04020	Calcium signaling pathway	http://www.kegg.jp/kegg-bin/show_pathway?ko04020+K05450
L8J595	K05450	PDGFC_D	platelet derived growth factor C/D	ko04072	Phospholipase D signaling pathway	http://www.kegg.jp/kegg-bin/show_pathway?ko04072+K05450
L8J595	K05450	PDGFC_D	platelet derived growth factor C/D	ko04151	PI3K-Akt signaling pathway	http://www.kegg.jp/kegg-bin/show_pathway?ko04151+K05450
L8J595	K05450	PDGFC_D	platelet derived growth factor C/D	ko04510	Focal adhesion	http://www.kegg.jp/kegg-bin/show_pathway?ko04510+K05450
L8J595	K05450	PDGFC_D	platelet derived growth factor C/D	ko04540	Gap junction	http://www.kegg.jp/kegg-bin/show_pathway?ko04540+K05450
L8J595	K05450	PDGFC_D	platelet derived growth factor C/D	ko04810	Regulation of actin cytoskeleton	http://www.kegg.jp/kegg-bin/show_pathway?ko04810+K05450
L8J595	K05450	PDGFC_D	platelet derived growth factor C/D	ko05215	Prostate cancer	http://www.kegg.jp/kegg-bin/show_pathway?ko05215+K05450
L8J595	K05450	PDGFC_D	platelet derived growth factor C/D	ko05218	Melanoma	http://www.kegg.jp/kegg-bin/show_pathway?ko05218+K05450
L8J595	K05450	PDGFC_D	platelet derived growth factor C/D	ko05231	Choline metabolism in cancer	http://www.kegg.jp/kegg-bin/show_pathway?ko05231+K05450
L8J026	K17295	TSPAN6	tetraspanin-6
L8IB26	K14994	SLC38A7_8	solute carrier family 38 (sodium-coupled neutral amino acid transporter), member 7/8
L8I463	K16449	RGS	regulator of G-protein signaling
L8IIM5	K04986	PKD2	polycystin 2
L8IAM6	K01348	PLAU	urokinase plasminogen activator [EC:3.4.21.73]	ko04064	NF-kappa B signaling pathway	http://www.kegg.jp/kegg-bin/show_pathway?ko04064+K01348
L8IAM6	K01348	PLAU	urokinase plasminogen activator [EC:3.4.21.73]	ko04610	Complement and coagulation cascades	http://www.kegg.jp/kegg-bin/show_pathway?ko04610+K01348
L8IAM6	K01348	PLAU	urokinase plasminogen activator [EC:3.4.21.73]	ko05202	Transcriptional misregulation in cancer	http://www.kegg.jp/kegg-bin/show_pathway?ko05202+K01348
L8IAM6	K01348	PLAU	urokinase plasminogen activator [EC:3.4.21.73]	ko05205	Proteoglycans in cancer	http://www.kegg.jp/kegg-bin/show_pathway?ko05205+K01348
L8IAM6	K01348	PLAU	urokinase plasminogen activator [EC:3.4.21.73]	ko05206	MicroRNAs in cancer	http://www.kegg.jp/kegg-bin/show_pathway?ko05206+K01348
L8IAM6	K01348	PLAU	urokinase plasminogen activator [EC:3.4.21.73]	ko05215	Prostate cancer	http://www.kegg.jp/kegg-bin/show_pathway?ko05215+K01348
L8J2L7	K10658	MARCH3	E3 ubiquitin-protein ligase MARCH3 [EC:2.3.2.27]
L8IDJ1	K11125	SMG5, EST1B	protein SMG5	ko03015	mRNA surveillance pathway	http://www.kegg.jp/kegg-bin/show_pathway?ko03015+K11125
L8IJ81	K13698	ABHD4	abhydrolase domain-containing protein 4
L8I2U1	K24019	FCGRT	IgG receptor FcRn large subunit p51
L8IHQ3	K08759	APOC3	apolipoprotein C-III	ko03320	PPAR signaling pathway	http://www.kegg.jp/kegg-bin/show_pathway?ko03320+K08759
L8IHQ3	K08759	APOC3	apolipoprotein C-III	ko04979	Cholesterol metabolism	http://www.kegg.jp/kegg-bin/show_pathway?ko04979+K08759
L8J5K4	K03999	C8G	complement component 8 subunit gamma	ko04610	Complement and coagulation cascades	http://www.kegg.jp/kegg-bin/show_pathway?ko04610+K03999
L8J5K4	K03999	C8G	complement component 8 subunit gamma	ko05020	Prion disease	http://www.kegg.jp/kegg-bin/show_pathway?ko05020+K03999
L8J5K4	K03999	C8G	complement component 8 subunit gamma	ko05146	Amoebiasis	http://www.kegg.jp/kegg-bin/show_pathway?ko05146+K03999
L8J5K4	K03999	C8G	complement component 8 subunit gamma	ko05171	Coronavirus disease - COVID-19	http://www.kegg.jp/kegg-bin/show_pathway?ko05171+K03999
L8J5K4	K03999	C8G	complement component 8 subunit gamma	ko05322	Systemic lupus erythematosus	http://www.kegg.jp/kegg-bin/show_pathway?ko05322+K03999
L8HUD1	K07521	UNC5	netrin receptor unc-5	ko04360	Axon guidance	http://www.kegg.jp/kegg-bin/show_pathway?ko04360+K07521
L8IB09	K05173	IL18R1, IL1RRP, CD218a	interleukin 18 receptor 1	ko04060	Cytokine-cytokine receptor interaction	http://www.kegg.jp/kegg-bin/show_pathway?ko04060+K05173
L8IB09	K05173	IL18R1, IL1RRP, CD218a	interleukin 18 receptor 1	ko04061	Viral protein interaction with cytokine and cytokine receptor	http://www.kegg.jp/kegg-bin/show_pathway?ko04061+K05173
L8IB09	K05173	IL18R1, IL1RRP, CD218a	interleukin 18 receptor 1	ko04668	TNF signaling pathway	http://www.kegg.jp/kegg-bin/show_pathway?ko04668+K05173
L8IB09	K05173	IL18R1, IL1RRP, CD218a	interleukin 18 receptor 1	ko05321	Inflammatory bowel disease	http://www.kegg.jp/kegg-bin/show_pathway?ko05321+K05173
L8IKE0
L8ITH3
L8I7V5	K05089	PDGFRB, CD140B	platelet-derived growth factor receptor beta [EC:2.7.10.1]	ko01521	EGFR tyrosine kinase inhibitor resistance	http://www.kegg.jp/kegg-bin/show_pathway?ko01521+K05089
L8I7V5	K05089	PDGFRB, CD140B	platelet-derived growth factor receptor beta [EC:2.7.10.1]	ko04010	MAPK signaling pathway	http://www.kegg.jp/kegg-bin/show_pathway?ko04010+K05089
L8I7V5	K05089	PDGFRB, CD140B	platelet-derived growth factor receptor beta [EC:2.7.10.1]	ko04014	Ras signaling pathway	http://www.kegg.jp/kegg-bin/show_pathway?ko04014+K05089
L8I7V5	K05089	PDGFRB, CD140B	platelet-derived growth factor receptor beta [EC:2.7.10.1]	ko04015	Rap1 signaling pathway	http://www.kegg.jp/kegg-bin/show_pathway?ko04015+K05089
L8I7V5	K05089	PDGFRB, CD140B	platelet-derived growth factor receptor beta [EC:2.7.10.1]	ko04020	Calcium signaling pathway	http://www.kegg.jp/kegg-bin/show_pathway?ko04020+K05089
L8I7V5	K05089	PDGFRB, CD140B	platelet-derived growth factor receptor beta [EC:2.7.10.1]	ko04072	Phospholipase D signaling pathway	http://www.kegg.jp/kegg-bin/show_pathway?ko04072+K05089
L8I7V5	K05089	PDGFRB, CD140B	platelet-derived growth factor receptor beta [EC:2.7.10.1]	ko04151	PI3K-Akt signaling pathway	http://www.kegg.jp/kegg-bin/show_pathway?ko04151+K05089
L8I7V5	K05089	PDGFRB, CD140B	platelet-derived growth factor receptor beta [EC:2.7.10.1]	ko04510	Focal adhesion	http://www.kegg.jp/kegg-bin/show_pathway?ko04510+K05089
L8I7V5	K05089	PDGFRB, CD140B	platelet-derived growth factor receptor beta [EC:2.7.10.1]	ko04540	Gap junction	http://www.kegg.jp/kegg-bin/show_pathway?ko04540+K05089
L8I7V5	K05089	PDGFRB, CD140B	platelet-derived growth factor receptor beta [EC:2.7.10.1]	ko04630	JAK-STAT signaling pathway	http://www.kegg.jp/kegg-bin/show_pathway?ko04630+K05089
L8I7V5	K05089	PDGFRB, CD140B	platelet-derived growth factor receptor beta [EC:2.7.10.1]	ko04810	Regulation of actin cytoskeleton	http://www.kegg.jp/kegg-bin/show_pathway?ko04810+K05089
L8I7V5	K05089	PDGFRB, CD140B	platelet-derived growth factor receptor beta [EC:2.7.10.1]	ko05165	Human papillomavirus infection	http://www.kegg.jp/kegg-bin/show_pathway?ko05165+K05089
L8I7V5	K05089	PDGFRB, CD140B	platelet-derived growth factor receptor beta [EC:2.7.10.1]	ko05200	Pathways in cancer	http://www.kegg.jp/kegg-bin/show_pathway?ko05200+K05089
L8I7V5	K05089	PDGFRB, CD140B	platelet-derived growth factor receptor beta [EC:2.7.10.1]	ko05206	MicroRNAs in cancer	http://www.kegg.jp/kegg-bin/show_pathway?ko05206+K05089
L8I7V5	K05089	PDGFRB, CD140B	platelet-derived growth factor receptor beta [EC:2.7.10.1]	ko05214	Glioma	http://www.kegg.jp/kegg-bin/show_pathway?ko05214+K05089
L8I7V5	K05089	PDGFRB, CD140B	platelet-derived growth factor receptor beta [EC:2.7.10.1]	ko05215	Prostate cancer	http://www.kegg.jp/kegg-bin/show_pathway?ko05215+K05089
L8I7V5	K05089	PDGFRB, CD140B	platelet-derived growth factor receptor beta [EC:2.7.10.1]	ko05218	Melanoma	http://www.kegg.jp/kegg-bin/show_pathway?ko05218+K05089
L8I7V5	K05089	PDGFRB, CD140B	platelet-derived growth factor receptor beta [EC:2.7.10.1]	ko05230	Central carbon metabolism in cancer	http://www.kegg.jp/kegg-bin/show_pathway?ko05230+K05089
L8I7V5	K05089	PDGFRB, CD140B	platelet-derived growth factor receptor beta [EC:2.7.10.1]	ko05231	Choline metabolism in cancer	http://www.kegg.jp/kegg-bin/show_pathway?ko05231+K05089
L8IUT9	K05125	DDR2, TKT, CD167b	discoidin domain receptor family member 2 [EC:2.7.10.1]
L8I1N5	K13044	HNRNPABD	heterogeneous nuclear ribonucleoprotein A/B/D
L8I662	K01852	LSS, ERG7	lanosterol synthase [EC:5.4.99.7]	ko00100	Steroid biosynthesis	http://www.kegg.jp/kegg-bin/show_pathway?ko00100+K01852
L8I662	K01852	LSS, ERG7	lanosterol synthase [EC:5.4.99.7]	ko01100	Metabolic pathways	http://www.kegg.jp/kegg-bin/show_pathway?ko01100+K01852
L8I662	K01852	LSS, ERG7	lanosterol synthase [EC:5.4.99.7]	ko01110	Biosynthesis of secondary metabolites	http://www.kegg.jp/kegg-bin/show_pathway?ko01110+K01852
L8IIL2	K03098	APOD	apolipoprotein D and lipocalin family protein
L8IFJ0	K23829	TNIP1, ABIN1	TNFAIP3-interacting protein 1	ko05131	Shigellosis	http://www.kegg.jp/kegg-bin/show_pathway?ko05131+K23829
L8I7Q8	K08498	STX6	syntaxin 6	ko04130	SNARE interactions in vesicular transport	http://www.kegg.jp/kegg-bin/show_pathway?ko04130+K08498
L8I284	K14638	SLC15A3_4, PHT	solute carrier family 15 (peptide/histidine transporter), member 3/4
L8IJ79	K07856	RHOB	Ras homolog gene family, member B	ko05132	Salmonella infection	http://www.kegg.jp/kegg-bin/show_pathway?ko05132+K07856
L8I177	K01476	E3.5.3.1, rocF, arg	arginase [EC:3.5.3.1]	ko00220	Arginine biosynthesis	http://www.kegg.jp/kegg-bin/show_pathway?ko00220+K01476
L8I177	K01476	E3.5.3.1, rocF, arg	arginase [EC:3.5.3.1]	ko00330	Arginine and proline metabolism	http://www.kegg.jp/kegg-bin/show_pathway?ko00330+K01476
L8I177	K01476	E3.5.3.1, rocF, arg	arginase [EC:3.5.3.1]	ko01100	Metabolic pathways	http://www.kegg.jp/kegg-bin/show_pathway?ko01100+K01476
L8I177	K01476	E3.5.3.1, rocF, arg	arginase [EC:3.5.3.1]	ko01110	Biosynthesis of secondary metabolites	http://www.kegg.jp/kegg-bin/show_pathway?ko01110+K01476
L8I177	K01476	E3.5.3.1, rocF, arg	arginase [EC:3.5.3.1]	ko01230	Biosynthesis of amino acids	http://www.kegg.jp/kegg-bin/show_pathway?ko01230+K01476
L8I177	K01476	E3.5.3.1, rocF, arg	arginase [EC:3.5.3.1]	ko05146	Amoebiasis	http://www.kegg.jp/kegg-bin/show_pathway?ko05146+K01476
L8IIZ9	K06770	MPZ	myelin protein zero	ko04514	Cell adhesion molecules	http://www.kegg.jp/kegg-bin/show_pathway?ko04514+K06770
L8IK78	K20994	NOTCH2	Notch 2	ko01522	Endocrine resistance	http://www.kegg.jp/kegg-bin/show_pathway?ko01522+K20994
L8IK78	K20994	NOTCH2	Notch 2	ko04320	Dorso-ventral axis formation	http://www.kegg.jp/kegg-bin/show_pathway?ko04320+K20994
L8IK78	K20994	NOTCH2	Notch 2	ko04330	Notch signaling pathway	http://www.kegg.jp/kegg-bin/show_pathway?ko04330+K20994
L8IK78	K20994	NOTCH2	Notch 2	ko04658	Th1 and Th2 cell differentiation	http://www.kegg.jp/kegg-bin/show_pathway?ko04658+K20994
L8IK78	K20994	NOTCH2	Notch 2	ko04919	Thyroid hormone signaling pathway	http://www.kegg.jp/kegg-bin/show_pathway?ko04919+K20994
L8IK78	K20994	NOTCH2	Notch 2	ko05165	Human papillomavirus infection	http://www.kegg.jp/kegg-bin/show_pathway?ko05165+K20994
L8IK78	K20994	NOTCH2	Notch 2	ko05200	Pathways in cancer	http://www.kegg.jp/kegg-bin/show_pathway?ko05200+K20994
L8IK78	K20994	NOTCH2	Notch 2	ko05206	MicroRNAs in cancer	http://www.kegg.jp/kegg-bin/show_pathway?ko05206+K20994
L8IK78	K20994	NOTCH2	Notch 2	ko05224	Breast cancer	http://www.kegg.jp/kegg-bin/show_pathway?ko05224+K20994
L8IUY7	K00507	SCD, desC	stearoyl-CoA desaturase (Delta-9 desaturase) [EC:1.14.19.1]	ko01040	Biosynthesis of unsaturated fatty acids	http://www.kegg.jp/kegg-bin/show_pathway?ko01040+K00507
L8IUY7	K00507	SCD, desC	stearoyl-CoA desaturase (Delta-9 desaturase) [EC:1.14.19.1]	ko01100	Metabolic pathways	http://www.kegg.jp/kegg-bin/show_pathway?ko01100+K00507
L8IUY7	K00507	SCD, desC	stearoyl-CoA desaturase (Delta-9 desaturase) [EC:1.14.19.1]	ko01212	Fatty acid metabolism	http://www.kegg.jp/kegg-bin/show_pathway?ko01212+K00507
L8IUY7	K00507	SCD, desC	stearoyl-CoA desaturase (Delta-9 desaturase) [EC:1.14.19.1]	ko03320	PPAR signaling pathway	http://www.kegg.jp/kegg-bin/show_pathway?ko03320+K00507
L8IUY7	K00507	SCD, desC	stearoyl-CoA desaturase (Delta-9 desaturase) [EC:1.14.19.1]	ko04152	AMPK signaling pathway	http://www.kegg.jp/kegg-bin/show_pathway?ko04152+K00507
L8IUY7	K00507	SCD, desC	stearoyl-CoA desaturase (Delta-9 desaturase) [EC:1.14.19.1]	ko04212	Longevity regulating pathway - worm	http://www.kegg.jp/kegg-bin/show_pathway?ko04212+K00507
L8IHA9	K07938	ARF3	ADP-ribosylation factor 3	ko04144	Endocytosis	http://www.kegg.jp/kegg-bin/show_pathway?ko04144+K07938
L8IG16	K16506	FAT1_2_3	protocadherin Fat 1/2/3
L8HRK0	K17987	NBR1	next to BRCA1 gene 1 protein	ko04137	Mitophagy - animal	http://www.kegg.jp/kegg-bin/show_pathway?ko04137+K17987
L8HQN3	K23793	PHLDA	pleckstrin homology-like domain family A
L8ICI6	K22988	TPRA1, GPR175	transmembrane protein adipocyte-associated 1
L8IDK7	K19911	SYT11	synaptotagmin-11
L8IXI6	K05115	AXL, UFO	AXL receptor tyrosine kinase [EC:2.7.10.1]	ko01521	EGFR tyrosine kinase inhibitor resistance	http://www.kegg.jp/kegg-bin/show_pathway?ko01521+K05115
L8IFV7	K06834	ADAM9	disintegrin and metalloproteinase domain-containing protein 9 [EC:3.4.24.-]
L8IWJ4	K05048	SLC6A15S	solute carrier family 6 (neurotransmitter transporter, amino acid/orphan) member 15/16/17/18/20
L8IHZ4	K15015	SLC32A, VGAT	solute carrier family 32 (vesicular inhibitory amino acid transporter)	ko04721	Synaptic vesicle cycle	http://www.kegg.jp/kegg-bin/show_pathway?ko04721+K15015
L8IHZ4	K15015	SLC32A, VGAT	solute carrier family 32 (vesicular inhibitory amino acid transporter)	ko04723	Retrograde endocannabinoid signaling	http://www.kegg.jp/kegg-bin/show_pathway?ko04723+K15015
L8IHZ4	K15015	SLC32A, VGAT	solute carrier family 32 (vesicular inhibitory amino acid transporter)	ko04727	GABAergic synapse	http://www.kegg.jp/kegg-bin/show_pathway?ko04727+K15015
L8IHZ4	K15015	SLC32A, VGAT	solute carrier family 32 (vesicular inhibitory amino acid transporter)	ko05032	Morphine addiction	http://www.kegg.jp/kegg-bin/show_pathway?ko05032+K15015
L8IHZ4	K15015	SLC32A, VGAT	solute carrier family 32 (vesicular inhibitory amino acid transporter)	ko05033	Nicotine addiction	http://www.kegg.jp/kegg-bin/show_pathway?ko05033+K15015
L8IY25	K14708	SLC26A11	solute carrier family 26 (sodium-independent sulfate anion transporter), member 11
L8I3Z2	K24172	CAND2, TIP120B	cullin-associated NEDD8-dissociated protein 2
L8HP51	K22583	TIMP2	metalloproteinase inhibitor 2
L8IKD7	K20050	LRP3_10_12	low-density lipoprotein receptor-related protein 3/10/12
L8IFC2	K03676	grxC, GLRX, GLRX2	glutaredoxin 3
L8J224	K05105	EPHA4, SEK, TYRO1	Eph receptor A4 [EC:2.7.10.1]	ko04360	Axon guidance	http://www.kegg.jp/kegg-bin/show_pathway?ko04360+K05105
L8I6Z9	K24518	CRIM1	cysteine-rich motor neuron 1 protein
L8J1B1	K08446	ADGRE5, CD97	CD97 antigen
L8IBH8
L8HRT7
L8IS69	K14381	SQSTM1	sequestosome 1	ko04137	Mitophagy - animal	http://www.kegg.jp/kegg-bin/show_pathway?ko04137+K14381
L8IS69	K14381	SQSTM1	sequestosome 1	ko04140	Autophagy - animal	http://www.kegg.jp/kegg-bin/show_pathway?ko04140+K14381
L8IS69	K14381	SQSTM1	sequestosome 1	ko04217	Necroptosis	http://www.kegg.jp/kegg-bin/show_pathway?ko04217+K14381
L8IS69	K14381	SQSTM1	sequestosome 1	ko04218	Cellular senescence	http://www.kegg.jp/kegg-bin/show_pathway?ko04218+K14381
L8IS69	K14381	SQSTM1	sequestosome 1	ko04380	Osteoclast differentiation	http://www.kegg.jp/kegg-bin/show_pathway?ko04380+K14381
L8IS69	K14381	SQSTM1	sequestosome 1	ko05014	Amyotrophic lateral sclerosis	http://www.kegg.jp/kegg-bin/show_pathway?ko05014+K14381
L8IS69	K14381	SQSTM1	sequestosome 1	ko05022	Pathways of neurodegeneration - multiple diseases	http://www.kegg.jp/kegg-bin/show_pathway?ko05022+K14381
L8IS69	K14381	SQSTM1	sequestosome 1	ko05131	Shigellosis	http://www.kegg.jp/kegg-bin/show_pathway?ko05131+K14381
L8IS69	K14381	SQSTM1	sequestosome 1	ko05418	Fluid shear stress and atherosclerosis	http://www.kegg.jp/kegg-bin/show_pathway?ko05418+K14381
L8HLW7
L8INI7	K05843	TGFBR3	transforming growth factor, beta receptor III
L8J3Q3	K06052	JAG1, CD339	jagged-1	ko01522	Endocrine resistance	http://www.kegg.jp/kegg-bin/show_pathway?ko01522+K06052
L8J3Q3	K06052	JAG1, CD339	jagged-1	ko04330	Notch signaling pathway	http://www.kegg.jp/kegg-bin/show_pathway?ko04330+K06052
L8J3Q3	K06052	JAG1, CD339	jagged-1	ko04371	Apelin signaling pathway	http://www.kegg.jp/kegg-bin/show_pathway?ko04371+K06052
L8J3Q3	K06052	JAG1, CD339	jagged-1	ko04658	Th1 and Th2 cell differentiation	http://www.kegg.jp/kegg-bin/show_pathway?ko04658+K06052
L8J3Q3	K06052	JAG1, CD339	jagged-1	ko04668	TNF signaling pathway	http://www.kegg.jp/kegg-bin/show_pathway?ko04668+K06052
L8J3Q3	K06052	JAG1, CD339	jagged-1	ko05165	Human papillomavirus infection	http://www.kegg.jp/kegg-bin/show_pathway?ko05165+K06052
L8J3Q3	K06052	JAG1, CD339	jagged-1	ko05200	Pathways in cancer	http://www.kegg.jp/kegg-bin/show_pathway?ko05200+K06052
L8J3Q3	K06052	JAG1, CD339	jagged-1	ko05224	Breast cancer	http://www.kegg.jp/kegg-bin/show_pathway?ko05224+K06052
L8HSH3	K00511	SQLE, ERG1	squalene monooxygenase [EC:1.14.14.17]	ko00100	Steroid biosynthesis	http://www.kegg.jp/kegg-bin/show_pathway?ko00100+K00511
L8HSH3	K00511	SQLE, ERG1	squalene monooxygenase [EC:1.14.14.17]	ko00909	Sesquiterpenoid and triterpenoid biosynthesis	http://www.kegg.jp/kegg-bin/show_pathway?ko00909+K00511
L8HSH3	K00511	SQLE, ERG1	squalene monooxygenase [EC:1.14.14.17]	ko01100	Metabolic pathways	http://www.kegg.jp/kegg-bin/show_pathway?ko01100+K00511
L8HSH3	K00511	SQLE, ERG1	squalene monooxygenase [EC:1.14.14.17]	ko01110	Biosynthesis of secondary metabolites	http://www.kegg.jp/kegg-bin/show_pathway?ko01110+K00511
L8HRW8	K01787	RENBP	N-acylglucosamine 2-epimerase [EC:5.1.3.8]	ko00520	Amino sugar and nucleotide sugar metabolism	http://www.kegg.jp/kegg-bin/show_pathway?ko00520+K01787
L8HRW8	K01787	RENBP	N-acylglucosamine 2-epimerase [EC:5.1.3.8]	ko01100	Metabolic pathways	http://www.kegg.jp/kegg-bin/show_pathway?ko01100+K01787
L8IGC3	K00510	HMOX1	heme oxygenase 1 [EC:1.14.14.18]	ko00860	Porphyrin and chlorophyll metabolism	http://www.kegg.jp/kegg-bin/show_pathway?ko00860+K00510
L8IGC3	K00510	HMOX1	heme oxygenase 1 [EC:1.14.14.18]	ko01100	Metabolic pathways	http://www.kegg.jp/kegg-bin/show_pathway?ko01100+K00510
L8IGC3	K00510	HMOX1	heme oxygenase 1 [EC:1.14.14.18]	ko01110	Biosynthesis of secondary metabolites	http://www.kegg.jp/kegg-bin/show_pathway?ko01110+K00510
L8IGC3	K00510	HMOX1	heme oxygenase 1 [EC:1.14.14.18]	ko04066	HIF-1 signaling pathway	http://www.kegg.jp/kegg-bin/show_pathway?ko04066+K00510
L8IGC3	K00510	HMOX1	heme oxygenase 1 [EC:1.14.14.18]	ko04216	Ferroptosis	http://www.kegg.jp/kegg-bin/show_pathway?ko04216+K00510
L8IGC3	K00510	HMOX1	heme oxygenase 1 [EC:1.14.14.18]	ko04978	Mineral absorption	http://www.kegg.jp/kegg-bin/show_pathway?ko04978+K00510
L8IGC3	K00510	HMOX1	heme oxygenase 1 [EC:1.14.14.18]	ko05200	Pathways in cancer	http://www.kegg.jp/kegg-bin/show_pathway?ko05200+K00510
L8IGC3	K00510	HMOX1	heme oxygenase 1 [EC:1.14.14.18]	ko05206	MicroRNAs in cancer	http://www.kegg.jp/kegg-bin/show_pathway?ko05206+K00510
L8IGC3	K00510	HMOX1	heme oxygenase 1 [EC:1.14.14.18]	ko05225	Hepatocellular carcinoma	http://www.kegg.jp/kegg-bin/show_pathway?ko05225+K00510
L8IGC3	K00510	HMOX1	heme oxygenase 1 [EC:1.14.14.18]	ko05418	Fluid shear stress and atherosclerosis	http://www.kegg.jp/kegg-bin/show_pathway?ko05418+K00510
L8IZE6
L8IVA1	K06840	SEMA3	semaphorin 3	ko04360	Axon guidance	http://www.kegg.jp/kegg-bin/show_pathway?ko04360+K06840
L8HX22	K00720	UGCG	ceramide glucosyltransferase [EC:2.4.1.80]	ko00600	Sphingolipid metabolism	http://www.kegg.jp/kegg-bin/show_pathway?ko00600+K00720
L8HX22	K00720	UGCG	ceramide glucosyltransferase [EC:2.4.1.80]	ko01100	Metabolic pathways	http://www.kegg.jp/kegg-bin/show_pathway?ko01100+K00720
L8I958	K16336	SDC2, CD362	syndecan 2	ko04361	Axon regeneration	http://www.kegg.jp/kegg-bin/show_pathway?ko04361+K16336
L8I958	K16336	SDC2, CD362	syndecan 2	ko04514	Cell adhesion molecules	http://www.kegg.jp/kegg-bin/show_pathway?ko04514+K16336
L8I958	K16336	SDC2, CD362	syndecan 2	ko05144	Malaria	http://www.kegg.jp/kegg-bin/show_pathway?ko05144+K16336
L8I958	K16336	SDC2, CD362	syndecan 2	ko05205	Proteoglycans in cancer	http://www.kegg.jp/kegg-bin/show_pathway?ko05205+K16336
L8I958	K16336	SDC2, CD362	syndecan 2	ko05418	Fluid shear stress and atherosclerosis	http://www.kegg.jp/kegg-bin/show_pathway?ko05418+K16336
L8J1T9	K10604	MGRN1	E3 ubiquitin-protein ligase MGRN1 [EC:2.3.2.27]	ko04120	Ubiquitin mediated proteolysis	http://www.kegg.jp/kegg-bin/show_pathway?ko04120+K10604
L8J1T9	K10604	MGRN1	E3 ubiquitin-protein ligase MGRN1 [EC:2.3.2.27]	ko04340	Hedgehog signaling pathway	http://www.kegg.jp/kegg-bin/show_pathway?ko04340+K10604
L8I2H4
L8IA65	K05171	IL1RL1, ST2	interleukin 1 receptor-like 1	ko04060	Cytokine-cytokine receptor interaction	http://www.kegg.jp/kegg-bin/show_pathway?ko04060+K05171
L8J351
L8IRV6	K10368	CAPG	capping protein (actin filament), gelsolin-like
L8ILX6
L8J188	K13864	SLC7A2, ATRC2	solute carrier family 7 (cationic amino acid transporter), member 2
L8HUH1	K13855	SLC4A2, AE2	solute carrier family 4 (anion exchanger), member 2	ko04970	Salivary secretion	http://www.kegg.jp/kegg-bin/show_pathway?ko04970+K13855
L8HUH1	K13855	SLC4A2, AE2	solute carrier family 4 (anion exchanger), member 2	ko04971	Gastric acid secretion	http://www.kegg.jp/kegg-bin/show_pathway?ko04971+K13855
L8HUH1	K13855	SLC4A2, AE2	solute carrier family 4 (anion exchanger), member 2	ko04972	Pancreatic secretion	http://www.kegg.jp/kegg-bin/show_pathway?ko04972+K13855
L8HUH1	K13855	SLC4A2, AE2	solute carrier family 4 (anion exchanger), member 2	ko04976	Bile secretion	http://www.kegg.jp/kegg-bin/show_pathway?ko04976+K13855
L8I9E0	K04524	APOE	apolipoprotein E	ko04979	Cholesterol metabolism	http://www.kegg.jp/kegg-bin/show_pathway?ko04979+K04524
L8I9E0	K04524	APOE	apolipoprotein E	ko05010	Alzheimer disease	http://www.kegg.jp/kegg-bin/show_pathway?ko05010+K04524
L8J1H5	K20028	ZDHHC2_15_20	palmitoyltransferase ZDHHC2/15/20 [EC:2.3.1.225]
L8IX69	K12473	LDLR	low-density lipoprotein receptor	ko04144	Endocytosis	http://www.kegg.jp/kegg-bin/show_pathway?ko04144+K12473
L8IX69	K12473	LDLR	low-density lipoprotein receptor	ko04913	Ovarian steroidogenesis	http://www.kegg.jp/kegg-bin/show_pathway?ko04913+K12473
L8IX69	K12473	LDLR	low-density lipoprotein receptor	ko04925	Aldosterone synthesis and secretion	http://www.kegg.jp/kegg-bin/show_pathway?ko04925+K12473
L8IX69	K12473	LDLR	low-density lipoprotein receptor	ko04927	Cortisol synthesis and secretion	http://www.kegg.jp/kegg-bin/show_pathway?ko04927+K12473
L8IX69	K12473	LDLR	low-density lipoprotein receptor	ko04934	Cushing syndrome	http://www.kegg.jp/kegg-bin/show_pathway?ko04934+K12473
L8IX69	K12473	LDLR	low-density lipoprotein receptor	ko04976	Bile secretion	http://www.kegg.jp/kegg-bin/show_pathway?ko04976+K12473
L8IX69	K12473	LDLR	low-density lipoprotein receptor	ko04979	Cholesterol metabolism	http://www.kegg.jp/kegg-bin/show_pathway?ko04979+K12473
L8IX69	K12473	LDLR	low-density lipoprotein receptor	ko05145	Toxoplasmosis	http://www.kegg.jp/kegg-bin/show_pathway?ko05145+K12473
L8IX69	K12473	LDLR	low-density lipoprotein receptor	ko05160	Hepatitis C	http://www.kegg.jp/kegg-bin/show_pathway?ko05160+K12473
L8IX69	K12473	LDLR	low-density lipoprotein receptor	ko05417	Lipid and atherosclerosis	http://www.kegg.jp/kegg-bin/show_pathway?ko05417+K12473
L8IUR0	K21348	CALCOCO2, NDP52	calcium-binding and coiled-coil domain-containing protein 2	ko04137	Mitophagy - animal	http://www.kegg.jp/kegg-bin/show_pathway?ko04137+K21348
L8IUR0	K21348	CALCOCO2, NDP52	calcium-binding and coiled-coil domain-containing protein 2	ko05131	Shigellosis	http://www.kegg.jp/kegg-bin/show_pathway?ko05131+K21348
L8IUR0	K21348	CALCOCO2, NDP52	calcium-binding and coiled-coil domain-containing protein 2	ko05164	Influenza A	http://www.kegg.jp/kegg-bin/show_pathway?ko05164+K21348
L8IYJ5	K06829	CYR61, CCN1, IGFBP10	insulin-like growth factor-binding protein 10
L8IG34
L8IX54	K08341	GABARAP, ATG8, LC3	GABA(A) receptor-associated protein	ko04068	FoxO signaling pathway	http://www.kegg.jp/kegg-bin/show_pathway?ko04068+K08341
L8IX54	K08341	GABARAP, ATG8, LC3	GABA(A) receptor-associated protein	ko04136	Autophagy - other	http://www.kegg.jp/kegg-bin/show_pathway?ko04136+K08341
L8IX54	K08341	GABARAP, ATG8, LC3	GABA(A) receptor-associated protein	ko04137	Mitophagy - animal	http://www.kegg.jp/kegg-bin/show_pathway?ko04137+K08341
L8IX54	K08341	GABARAP, ATG8, LC3	GABA(A) receptor-associated protein	ko04138	Autophagy - yeast	http://www.kegg.jp/kegg-bin/show_pathway?ko04138+K08341
L8IX54	K08341	GABARAP, ATG8, LC3	GABA(A) receptor-associated protein	ko04139	Mitophagy - yeast	http://www.kegg.jp/kegg-bin/show_pathway?ko04139+K08341
L8IX54	K08341	GABARAP, ATG8, LC3	GABA(A) receptor-associated protein	ko04140	Autophagy - animal	http://www.kegg.jp/kegg-bin/show_pathway?ko04140+K08341
L8IX54	K08341	GABARAP, ATG8, LC3	GABA(A) receptor-associated protein	ko04212	Longevity regulating pathway - worm	http://www.kegg.jp/kegg-bin/show_pathway?ko04212+K08341
L8IX54	K08341	GABARAP, ATG8, LC3	GABA(A) receptor-associated protein	ko04371	Apelin signaling pathway	http://www.kegg.jp/kegg-bin/show_pathway?ko04371+K08341
L8IX54	K08341	GABARAP, ATG8, LC3	GABA(A) receptor-associated protein	ko04621	NOD-like receptor signaling pathway	http://www.kegg.jp/kegg-bin/show_pathway?ko04621+K08341
L8IX54	K08341	GABARAP, ATG8, LC3	GABA(A) receptor-associated protein	ko04727	GABAergic synapse	http://www.kegg.jp/kegg-bin/show_pathway?ko04727+K08341
L8IX54	K08341	GABARAP, ATG8, LC3	GABA(A) receptor-associated protein	ko05014	Amyotrophic lateral sclerosis	http://www.kegg.jp/kegg-bin/show_pathway?ko05014+K08341
L8IX54	K08341	GABARAP, ATG8, LC3	GABA(A) receptor-associated protein	ko05022	Pathways of neurodegeneration - multiple diseases	http://www.kegg.jp/kegg-bin/show_pathway?ko05022+K08341
L8IX54	K08341	GABARAP, ATG8, LC3	GABA(A) receptor-associated protein	ko05131	Shigellosis	http://www.kegg.jp/kegg-bin/show_pathway?ko05131+K08341
L8IX54	K08341	GABARAP, ATG8, LC3	GABA(A) receptor-associated protein	ko05167	Kaposi sarcoma-associated herpesvirus infection	http://www.kegg.jp/kegg-bin/show_pathway?ko05167+K08341
L8I3L2	K13885	SCARB1	scavenger receptor class B, member 1	ko04145	Phagosome	http://www.kegg.jp/kegg-bin/show_pathway?ko04145+K13885
L8I3L2	K13885	SCARB1	scavenger receptor class B, member 1	ko04913	Ovarian steroidogenesis	http://www.kegg.jp/kegg-bin/show_pathway?ko04913+K13885
L8I3L2	K13885	SCARB1	scavenger receptor class B, member 1	ko04925	Aldosterone synthesis and secretion	http://www.kegg.jp/kegg-bin/show_pathway?ko04925+K13885
L8I3L2	K13885	SCARB1	scavenger receptor class B, member 1	ko04927	Cortisol synthesis and secretion	http://www.kegg.jp/kegg-bin/show_pathway?ko04927+K13885
L8I3L2	K13885	SCARB1	scavenger receptor class B, member 1	ko04934	Cushing syndrome	http://www.kegg.jp/kegg-bin/show_pathway?ko04934+K13885
L8I3L2	K13885	SCARB1	scavenger receptor class B, member 1	ko04975	Fat digestion and absorption	http://www.kegg.jp/kegg-bin/show_pathway?ko04975+K13885
L8I3L2	K13885	SCARB1	scavenger receptor class B, member 1	ko04976	Bile secretion	http://www.kegg.jp/kegg-bin/show_pathway?ko04976+K13885
L8I3L2	K13885	SCARB1	scavenger receptor class B, member 1	ko04977	Vitamin digestion and absorption	http://www.kegg.jp/kegg-bin/show_pathway?ko04977+K13885
L8I3L2	K13885	SCARB1	scavenger receptor class B, member 1	ko04979	Cholesterol metabolism	http://www.kegg.jp/kegg-bin/show_pathway?ko04979+K13885
L8I3L2	K13885	SCARB1	scavenger receptor class B, member 1	ko05160	Hepatitis C	http://www.kegg.jp/kegg-bin/show_pathway?ko05160+K13885
L8IY30	K16860	PLD3_4	phospholipase D3/4 [EC:3.1.4.4]	ko00564	Glycerophospholipid metabolism	http://www.kegg.jp/kegg-bin/show_pathway?ko00564+K16860
L8IY30	K16860	PLD3_4	phospholipase D3/4 [EC:3.1.4.4]	ko00565	Ether lipid metabolism	http://www.kegg.jp/kegg-bin/show_pathway?ko00565+K16860
L8IY30	K16860	PLD3_4	phospholipase D3/4 [EC:3.1.4.4]	ko01100	Metabolic pathways	http://www.kegg.jp/kegg-bin/show_pathway?ko01100+K16860
L8IY30	K16860	PLD3_4	phospholipase D3/4 [EC:3.1.4.4]	ko01110	Biosynthesis of secondary metabolites	http://www.kegg.jp/kegg-bin/show_pathway?ko01110+K16860
L8IWR9	K09784	EREG	epiregulin	ko04010	MAPK signaling pathway	http://www.kegg.jp/kegg-bin/show_pathway?ko04010+K09784
L8IWR9	K09784	EREG	epiregulin	ko04012	ErbB signaling pathway	http://www.kegg.jp/kegg-bin/show_pathway?ko04012+K09784
L8IWR9	K09784	EREG	epiregulin	ko04151	PI3K-Akt signaling pathway	http://www.kegg.jp/kegg-bin/show_pathway?ko04151+K09784
L8IWR9	K09784	EREG	epiregulin	ko05210	Colorectal cancer	http://www.kegg.jp/kegg-bin/show_pathway?ko05210+K09784
L8J121	K17254	SDCBP	syntenin-1
L8IKX6	K01641	E2.3.3.10	hydroxymethylglutaryl-CoA synthase [EC:2.3.3.10]	ko00072	Synthesis and degradation of ketone bodies	http://www.kegg.jp/kegg-bin/show_pathway?ko00072+K01641
L8IKX6	K01641	E2.3.3.10	hydroxymethylglutaryl-CoA synthase [EC:2.3.3.10]	ko00280	Valine, leucine and isoleucine degradation	http://www.kegg.jp/kegg-bin/show_pathway?ko00280+K01641
L8IKX6	K01641	E2.3.3.10	hydroxymethylglutaryl-CoA synthase [EC:2.3.3.10]	ko00650	Butanoate metabolism	http://www.kegg.jp/kegg-bin/show_pathway?ko00650+K01641
L8IKX6	K01641	E2.3.3.10	hydroxymethylglutaryl-CoA synthase [EC:2.3.3.10]	ko00900	Terpenoid backbone biosynthesis	http://www.kegg.jp/kegg-bin/show_pathway?ko00900+K01641
L8IKX6	K01641	E2.3.3.10	hydroxymethylglutaryl-CoA synthase [EC:2.3.3.10]	ko01100	Metabolic pathways	http://www.kegg.jp/kegg-bin/show_pathway?ko01100+K01641
L8IKX6	K01641	E2.3.3.10	hydroxymethylglutaryl-CoA synthase [EC:2.3.3.10]	ko01110	Biosynthesis of secondary metabolites	http://www.kegg.jp/kegg-bin/show_pathway?ko01110+K01641
L8IKX6	K01641	E2.3.3.10	hydroxymethylglutaryl-CoA synthase [EC:2.3.3.10]	ko03320	PPAR signaling pathway	http://www.kegg.jp/kegg-bin/show_pathway?ko03320+K01641
L8J1B9	K05060	IL6ST, GP130, CD130	interleukin 6 signal transducer	ko04060	Cytokine-cytokine receptor interaction	http://www.kegg.jp/kegg-bin/show_pathway?ko04060+K05060
L8J1B9	K05060	IL6ST, GP130, CD130	interleukin 6 signal transducer	ko04061	Viral protein interaction with cytokine and cytokine receptor	http://www.kegg.jp/kegg-bin/show_pathway?ko04061+K05060
L8J1B9	K05060	IL6ST, GP130, CD130	interleukin 6 signal transducer	ko04550	Signaling pathways regulating pluripotency of stem cells	http://www.kegg.jp/kegg-bin/show_pathway?ko04550+K05060
L8J1B9	K05060	IL6ST, GP130, CD130	interleukin 6 signal transducer	ko04630	JAK-STAT signaling pathway	http://www.kegg.jp/kegg-bin/show_pathway?ko04630+K05060
L8J1B9	K05060	IL6ST, GP130, CD130	interleukin 6 signal transducer	ko04659	Th17 cell differentiation	http://www.kegg.jp/kegg-bin/show_pathway?ko04659+K05060
L8J1B9	K05060	IL6ST, GP130, CD130	interleukin 6 signal transducer	ko05167	Kaposi sarcoma-associated herpesvirus infection	http://www.kegg.jp/kegg-bin/show_pathway?ko05167+K05060
L8J1B9	K05060	IL6ST, GP130, CD130	interleukin 6 signal transducer	ko05171	Coronavirus disease - COVID-19	http://www.kegg.jp/kegg-bin/show_pathway?ko05171+K05060
L8J1B9	K05060	IL6ST, GP130, CD130	interleukin 6 signal transducer	ko05200	Pathways in cancer	http://www.kegg.jp/kegg-bin/show_pathway?ko05200+K05060
L8J1B9	K05060	IL6ST, GP130, CD130	interleukin 6 signal transducer	ko05203	Viral carcinogenesis	http://www.kegg.jp/kegg-bin/show_pathway?ko05203+K05060
L8ILQ8	K10297	FBXO11	F-box protein 11
L8I9K6	K09289	NCOA4, PTC3	nuclear receptor coactivator 4	ko04216	Ferroptosis	http://www.kegg.jp/kegg-bin/show_pathway?ko04216+K09289
L8I9K6	K09289	NCOA4, PTC3	nuclear receptor coactivator 4	ko05200	Pathways in cancer	http://www.kegg.jp/kegg-bin/show_pathway?ko05200+K09289
L8I9K6	K09289	NCOA4, PTC3	nuclear receptor coactivator 4	ko05216	Thyroid cancer	http://www.kegg.jp/kegg-bin/show_pathway?ko05216+K09289
L8IWP2	K07372	GJA1, CX43	gap junction alpha-1 protein	ko04540	Gap junction	http://www.kegg.jp/kegg-bin/show_pathway?ko04540+K07372
L8IWP2	K07372	GJA1, CX43	gap junction alpha-1 protein	ko05412	Arrhythmogenic right ventricular cardiomyopathy	http://www.kegg.jp/kegg-bin/show_pathway?ko05412+K07372
L8IGK5	K04521	BACE1	beta-site APP-cleaving enzyme 1 (memapsin 2) [EC:3.4.23.46]	ko05010	Alzheimer disease	http://www.kegg.jp/kegg-bin/show_pathway?ko05010+K04521
L8IH78	K24513	ITIH3, SHAP	inter-alpha-trypsin inhibitor heavy chain H3
L8IP29	K09631	HGFAC	hepatocyte growth factor activator [EC:3.4.21.-]
L8IKT6	K01371	CTSK	cathepsin K [EC:3.4.22.38]	ko04142	Lysosome	http://www.kegg.jp/kegg-bin/show_pathway?ko04142+K01371
L8IKT6	K01371	CTSK	cathepsin K [EC:3.4.22.38]	ko04210	Apoptosis	http://www.kegg.jp/kegg-bin/show_pathway?ko04210+K01371
L8IKT6	K01371	CTSK	cathepsin K [EC:3.4.22.38]	ko04380	Osteoclast differentiation	http://www.kegg.jp/kegg-bin/show_pathway?ko04380+K01371
L8IKT6	K01371	CTSK	cathepsin K [EC:3.4.22.38]	ko04620	Toll-like receptor signaling pathway	http://www.kegg.jp/kegg-bin/show_pathway?ko04620+K01371
L8IKT6	K01371	CTSK	cathepsin K [EC:3.4.22.38]	ko05323	Rheumatoid arthritis	http://www.kegg.jp/kegg-bin/show_pathway?ko05323+K01371
L8HSM4	K23421	SPINT2	Kunitz-type protease inhibitor 2
L8IYZ8
L8HVY9	K18977	HPX	hemopexin
L8IM29	K07763	MMP14	matrix metalloproteinase-14 (membrane-inserted) [EC:3.4.24.80]	ko04668	TNF signaling pathway	http://www.kegg.jp/kegg-bin/show_pathway?ko04668+K07763
L8IM29	K07763	MMP14	matrix metalloproteinase-14 (membrane-inserted) [EC:3.4.24.80]	ko04912	GnRH signaling pathway	http://www.kegg.jp/kegg-bin/show_pathway?ko04912+K07763
L8IM29	K07763	MMP14	matrix metalloproteinase-14 (membrane-inserted) [EC:3.4.24.80]	ko04928	Parathyroid hormone synthesis, secretion and action	http://www.kegg.jp/kegg-bin/show_pathway?ko04928+K07763
L8HVH0	K18264	ITM2B	integral membrane protein 2B
L8I109	K06497	CD63, MLA1, TSPAN30	CD63 antigen	ko04142	Lysosome	http://www.kegg.jp/kegg-bin/show_pathway?ko04142+K06497
L8I109	K06497	CD63, MLA1, TSPAN30	CD63 antigen	ko05205	Proteoglycans in cancer	http://www.kegg.jp/kegg-bin/show_pathway?ko05205+K06497
L8I4L3	K04520	APP	amyloid beta A4 protein	ko04726	Serotonergic synapse	http://www.kegg.jp/kegg-bin/show_pathway?ko04726+K04520
L8I4L3	K04520	APP	amyloid beta A4 protein	ko05010	Alzheimer disease	http://www.kegg.jp/kegg-bin/show_pathway?ko05010+K04520
L8I4L3	K04520	APP	amyloid beta A4 protein	ko05022	Pathways of neurodegeneration - multiple diseases	http://www.kegg.jp/kegg-bin/show_pathway?ko05022+K04520
L8IBF2	K05478	TNFSF15, VEGI	tumor necrosis factor ligand superfamily member 15	ko04060	Cytokine-cytokine receptor interaction	http://www.kegg.jp/kegg-bin/show_pathway?ko04060+K05478
L8IED3	K16866	TIMP3	metalloproteinase inhibitor 3	ko05205	Proteoglycans in cancer	http://www.kegg.jp/kegg-bin/show_pathway?ko05205+K16866
L8IED3	K16866	TIMP3	metalloproteinase inhibitor 3	ko05206	MicroRNAs in cancer	http://www.kegg.jp/kegg-bin/show_pathway?ko05206+K16866
L8IUY4	K23544	SERINC1_3	serine incorporator 1/3
L8IF42	K08763	OLR1	oxidised low-density lipoprotein receptor 1	ko03320	PPAR signaling pathway	http://www.kegg.jp/kegg-bin/show_pathway?ko03320+K08763
L8IF42	K08763	OLR1	oxidised low-density lipoprotein receptor 1	ko04145	Phagosome	http://www.kegg.jp/kegg-bin/show_pathway?ko04145+K08763
L8IF42	K08763	OLR1	oxidised low-density lipoprotein receptor 1	ko05417	Lipid and atherosclerosis	http://www.kegg.jp/kegg-bin/show_pathway?ko05417+K08763
L8HSX9	K23087	TFPI2	tissue factor pathway inhibitor 2
L8HVI0	K06827	CTGF, CCN2, IGFBP8	connective tissue growth factor (insulin-like growth factor-binding protein 8)	ko04371	Apelin signaling pathway	http://www.kegg.jp/kegg-bin/show_pathway?ko04371+K06827
L8HVI0	K06827	CTGF, CCN2, IGFBP8	connective tissue growth factor (insulin-like growth factor-binding protein 8)	ko04390	Hippo signaling pathway	http://www.kegg.jp/kegg-bin/show_pathway?ko04390+K06827
L8IQ63	K24243	CRISPLD	cysteine-rich secretory protein LCCL domain-containing
L8J634	K05149	TNFRSF12A, FN14, TWEAKR, CD266	tumor necrosis factor receptor superfamily member 12A	ko04060	Cytokine-cytokine receptor interaction	http://www.kegg.jp/kegg-bin/show_pathway?ko04060+K05149
L8IC85	K01053	gnl, RGN	gluconolactonase [EC:3.1.1.17]	ko00030	Pentose phosphate pathway	http://www.kegg.jp/kegg-bin/show_pathway?ko00030+K01053
L8IC85	K01053	gnl, RGN	gluconolactonase [EC:3.1.1.17]	ko00053	Ascorbate and aldarate metabolism	http://www.kegg.jp/kegg-bin/show_pathway?ko00053+K01053
L8IC85	K01053	gnl, RGN	gluconolactonase [EC:3.1.1.17]	ko00930	Caprolactam degradation	http://www.kegg.jp/kegg-bin/show_pathway?ko00930+K01053
L8IC85	K01053	gnl, RGN	gluconolactonase [EC:3.1.1.17]	ko01100	Metabolic pathways	http://www.kegg.jp/kegg-bin/show_pathway?ko01100+K01053
L8IC85	K01053	gnl, RGN	gluconolactonase [EC:3.1.1.17]	ko01110	Biosynthesis of secondary metabolites	http://www.kegg.jp/kegg-bin/show_pathway?ko01110+K01053
L8IC85	K01053	gnl, RGN	gluconolactonase [EC:3.1.1.17]	ko01120	Microbial metabolism in diverse environments	http://www.kegg.jp/kegg-bin/show_pathway?ko01120+K01053
L8IC85	K01053	gnl, RGN	gluconolactonase [EC:3.1.1.17]	ko01200	Carbon metabolism	http://www.kegg.jp/kegg-bin/show_pathway?ko01200+K01053
L8IC85	K01053	gnl, RGN	gluconolactonase [EC:3.1.1.17]	ko01220	Degradation of aromatic compounds	http://www.kegg.jp/kegg-bin/show_pathway?ko01220+K01053
L8IC85	K01053	gnl, RGN	gluconolactonase [EC:3.1.1.17]	ko01240	Biosynthesis of cofactors	http://www.kegg.jp/kegg-bin/show_pathway?ko01240+K01053
L8HYP7

## Sheet: map2query
Map ID	Map Name	Seqs	#Seqs	URL
ko04142	Lysosome	L8HX98 L8I0I4 L8J0P6 L8I9A3 L8J332 L8J197 L8IJX9 L8I5C0 L8IKX5 L8HW02 L8HZ02 L8IBA7 L8IKT6 L8I109	14	http://www.kegg.jp/kegg-bin/show_pathway?ko04142+K01369+K01074+K01206+K01074+K01444+K12348+K06129+K01379+K01052+K01279+K01206+K12373+K01371+K06497
ko04612	Antigen processing and presentation	L8HX98	1	http://www.kegg.jp/kegg-bin/show_pathway?ko04612+K01369
ko00190	Oxidative phosphorylation	L8I7C0 L8IAH1	2	http://www.kegg.jp/kegg-bin/show_pathway?ko00190+K03948+K02152
ko01100	Metabolic pathways	L8I7C0 L8I0I4 L8HV64 L8HZ66 L8I8E6 L8J0L8 L8ICD6 L8IZX3 L8HXP8 L8I9A3 L8HWY2 L8J197 L8J0U4 L8I966 L8IXW8 L8IPN7 L8IBA7 L8HWS9 L8IUU5 L8J1X3 L8IGX7 L8IDK5 L8I6V6 L8IAH1 L8I662 L8I177 L8IUY7 L8HSH3 L8HRW8 L8IGC3 L8HX22 L8IY30 L8IKX6 L8IC85	34	http://www.kegg.jp/kegg-bin/show_pathway?ko01100+K03948+K01074+K00850+K00927+K01834+K08967+K00016+K00927+K01803+K01074+K00844+K12348+K01623+K00600+K05361+K00432+K12373+K01062+K00019+K07748+K03783+K00787+K03783+K02152+K01852+K01476+K00507+K00511+K01787+K00510+K00720+K16860+K01641+K01053
ko04714	Thermogenesis	L8I7C0	1	http://www.kegg.jp/kegg-bin/show_pathway?ko04714+K03948
ko04723	Retrograde endocannabinoid signaling	L8I7C0 L8IHZ4	2	http://www.kegg.jp/kegg-bin/show_pathway?ko04723+K03948+K15015
ko04932	Non-alcoholic fatty liver disease	L8I7C0 L8HQI2	2	http://www.kegg.jp/kegg-bin/show_pathway?ko04932+K03948+K07296
ko05010	Alzheimer disease	L8I7C0 L8I1W1 L8I9E0 L8IGK5 L8I4L3	5	http://www.kegg.jp/kegg-bin/show_pathway?ko05010+K03948+K09054+K04524+K04521+K04520
ko05012	Parkinson disease	L8I7C0 L8I1W1	2	http://www.kegg.jp/kegg-bin/show_pathway?ko05012+K03948+K09054
ko05014	Amyotrophic lateral sclerosis	L8I7C0 L8IE45 L8IPN7 L8J5Y3 L8I1W1 L8I0B0 L8IS69 L8IX54	8	http://www.kegg.jp/kegg-bin/show_pathway?ko05014+K03948+K17095+K00432+K23609+K09054+K19946+K14381+K08341
ko05016	Huntington disease	L8I7C0 L8IPN7	2	http://www.kegg.jp/kegg-bin/show_pathway?ko05016+K03948+K00432
ko05020	Prion disease	L8I7C0 L8HXR1 L8HW79 L8J5K4	4	http://www.kegg.jp/kegg-bin/show_pathway?ko05020+K03948+K12959+K05634+K03999
ko05022	Pathways of neurodegeneration - multiple diseases	L8I7C0 L8IPN7 L8J5Y3 L8I1W1 L8HW79 L8I0B0 L8IS69 L8IX54 L8I4L3	9	http://www.kegg.jp/kegg-bin/show_pathway?ko05022+K03948+K00432+K23609+K09054+K05634+K19946+K14381+K08341+K04520
ko05415	Diabetic cardiomyopathy	L8I7C0 L8HX06 L8I793 L8I5C0	4	http://www.kegg.jp/kegg-bin/show_pathway?ko05415+K03948+K09821+K04500+K01379
ko04666	Fc gamma R-mediated phagocytosis	L8HZM0	1	http://www.kegg.jp/kegg-bin/show_pathway?ko04666+K13536
ko05140	Leishmaniasis	L8HZM0	1	http://www.kegg.jp/kegg-bin/show_pathway?ko05140+K13536
ko03320	PPAR signaling pathway	L8HTX7 L8HQI2 L8IJN1 L8IHQ3 L8IUY7 L8IKX6 L8IF42	7	http://www.kegg.jp/kegg-bin/show_pathway?ko03320+K08758+K07296+K08753+K08759+K00507+K01641+K08763
ko04979	Cholesterol metabolism	L8HTX7 L8IKX5 L8II73 L8IHQ3 L8I9E0 L8IX69 L8I3L2	7	http://www.kegg.jp/kegg-bin/show_pathway?ko04979+K08758+K01052+K22291+K08759+K04524+K12473+K13885
ko04390	Hippo signaling pathway	L8IT90 L8I793 L8HVI0	3	http://www.kegg.jp/kegg-bin/show_pathway?ko04390+K16144+K04500+K06827
ko04621	NOD-like receptor signaling pathway	L8IH11 L8IX54	2	http://www.kegg.jp/kegg-bin/show_pathway?ko04621+K20910+K08341
ko04610	Complement and coagulation cascades	L8J2N7 L8IIU6 L8I798 L8IX25 L8IHJ7 L8IU68 L8IIF1 L8I612 L8IAM6 L8J5K4	10	http://www.kegg.jp/kegg-bin/show_pathway?ko04610+K03983+K03984+K03903+K04001+K01333+K03911+K03985+K03902+K01348+K03999
ko00062	Fatty acid elongation	L8I0I4 L8I9A3 L8IPA4	3	http://www.kegg.jp/kegg-bin/show_pathway?ko00062+K01074+K01074+K16339
ko01212	Fatty acid metabolism	L8I0I4 L8I9A3 L8IUY7	3	http://www.kegg.jp/kegg-bin/show_pathway?ko01212+K01074+K01074+K00507
ko00010	Glycolysis / Gluconeogenesis	L8HV64 L8HZ66 L8I8E6 L8ICD6 L8IZX3 L8HXP8 L8HWY2 L8J0U4	8	http://www.kegg.jp/kegg-bin/show_pathway?ko00010+K00850+K00927+K01834+K00016+K00927+K01803+K00844+K01623
ko00030	Pentose phosphate pathway	L8HV64 L8J0U4 L8IC85	3	http://www.kegg.jp/kegg-bin/show_pathway?ko00030+K00850+K01623+K01053
ko00051	Fructose and mannose metabolism	L8HV64 L8HXP8 L8HWY2 L8J0U4	4	http://www.kegg.jp/kegg-bin/show_pathway?ko00051+K00850+K01803+K00844+K01623
ko00052	Galactose metabolism	L8HV64 L8HWY2	2	http://www.kegg.jp/kegg-bin/show_pathway?ko00052+K00850+K00844
ko00680	Methane metabolism	L8HV64 L8I8E6 L8J0U4 L8I966	4	http://www.kegg.jp/kegg-bin/show_pathway?ko00680+K00850+K01834+K01623+K00600
ko01110	Biosynthesis of secondary metabolites	L8HV64 L8HZ66 L8I8E6 L8ICD6 L8IZX3 L8HXP8 L8HWY2 L8J0U4 L8I966 L8J1X3 L8IGX7 L8IDK5 L8I6V6 L8IPA4 L8I662 L8I177 L8HSH3 L8IGC3 L8IY30 L8IKX6 L8IC85	21	http://www.kegg.jp/kegg-bin/show_pathway?ko01110+K00850+K00927+K01834+K00016+K00927+K01803+K00844+K01623+K00600+K07748+K03783+K00787+K03783+K16339+K01852+K01476+K00511+K00510+K16860+K01641+K01053
ko01120	Microbial metabolism in diverse environments	L8HV64 L8HZ66 L8I8E6 L8ICD6 L8IZX3 L8HXP8 L8HWY2 L8J0U4 L8I966 L8IC85	10	http://www.kegg.jp/kegg-bin/show_pathway?ko01120+K00850+K00927+K01834+K00016+K00927+K01803+K00844+K01623+K00600+K01053
ko01200	Carbon metabolism	L8HV64 L8HZ66 L8I8E6 L8IZX3 L8HXP8 L8HWY2 L8J0U4 L8I966 L8IC85	9	http://www.kegg.jp/kegg-bin/show_pathway?ko01200+K00850+K00927+K01834+K00927+K01803+K00844+K01623+K00600+K01053
ko01230	Biosynthesis of amino acids	L8HV64 L8HZ66 L8I8E6 L8IZX3 L8HXP8 L8J0U4 L8I966 L8I177	8	http://www.kegg.jp/kegg-bin/show_pathway?ko01230+K00850+K00927+K01834+K00927+K01803+K01623+K00600+K01476
ko03018	RNA degradation	L8HV64	1	http://www.kegg.jp/kegg-bin/show_pathway?ko03018+K00850
ko04066	HIF-1 signaling pathway	L8HV64 L8HZ66 L8ICD6 L8IZX3 L8J274 L8HWY2 L8J0U4 L8IGC3	8	http://www.kegg.jp/kegg-bin/show_pathway?ko04066+K00850+K00927+K00016+K00927+K12077+K00844+K01623+K00510
ko04152	AMPK signaling pathway	L8HV64 L8HQI2 L8IUY7	3	http://www.kegg.jp/kegg-bin/show_pathway?ko04152+K00850+K07296+K00507
ko04919	Thyroid hormone signaling pathway	L8HV64 L8IK78	2	http://www.kegg.jp/kegg-bin/show_pathway?ko04919+K00850+K20994
ko04922	Glucagon signaling pathway	L8HV64 L8I8E6 L8ICD6	3	http://www.kegg.jp/kegg-bin/show_pathway?ko04922+K00850+K01834+K00016
ko05230	Central carbon metabolism in cancer	L8HV64 L8I8E6 L8ICD6 L8J274 L8HWY2 L8I870 L8I7V5	7	http://www.kegg.jp/kegg-bin/show_pathway?ko05230+K00850+K01834+K00016+K12077+K00844+K05616+K05089
ko04611	Platelet activation	L8I798 L8IVX7	2	http://www.kegg.jp/kegg-bin/show_pathway?ko04611+K03903+K08512
ko04613	Neutrophil extracellular trap formation	L8I798 L8IMB9	2	http://www.kegg.jp/kegg-bin/show_pathway?ko04613+K03903+K11252
ko05171	Coronavirus disease - COVID-19	L8I798 L8J5K4 L8J1B9	3	http://www.kegg.jp/kegg-bin/show_pathway?ko05171+K03903+K03999+K05060
ko00710	Carbon fixation in photosynthetic organisms	L8HZ66 L8IZX3 L8HXP8 L8J0U4	4	http://www.kegg.jp/kegg-bin/show_pathway?ko00710+K00927+K00927+K01803+K01623
ko04210	Apoptosis	L8J4V3 L8I5C0 L8IKT6	3	http://www.kegg.jp/kegg-bin/show_pathway?ko04210+K07611+K01379+K01371
ko04214	Apoptosis - fly	L8J4V3	1	http://www.kegg.jp/kegg-bin/show_pathway?ko04214+K07611
ko04918	Thyroid hormone synthesis	L8ICD7 L8IPN7	2	http://www.kegg.jp/kegg-bin/show_pathway?ko04918+K20734+K00432
ko00260	Glycine, serine and threonine metabolism	L8I8E6 L8I966	2	http://www.kegg.jp/kegg-bin/show_pathway?ko00260+K01834+K00600
ko01524	Platinum drug resistance	L8HYH0 L8J1K1	2	http://www.kegg.jp/kegg-bin/show_pathway?ko01524+K10847+K17686
ko03420	Nucleotide excision repair	L8HYH0 L8I9H6	2	http://www.kegg.jp/kegg-bin/show_pathway?ko03420+K10847+K03141
ko00270	Cysteine and methionine metabolism	L8J0L8 L8ICD6	2	http://www.kegg.jp/kegg-bin/show_pathway?ko00270+K08967+K00016
ko00620	Pyruvate metabolism	L8ICD6	1	http://www.kegg.jp/kegg-bin/show_pathway?ko00620+K00016
ko00640	Propanoate metabolism	L8ICD6	1	http://www.kegg.jp/kegg-bin/show_pathway?ko00640+K00016
ko04146	Peroxisome	L8IBZ3	1	http://www.kegg.jp/kegg-bin/show_pathway?ko04146+K06664
ko04072	Phospholipase D signaling pathway	L8HX06 L8I018 L8J595 L8I7V5	4	http://www.kegg.jp/kegg-bin/show_pathway?ko04072+K09821+K07937+K05450+K05089
ko04080	Neuroactive ligand-receptor interaction	L8HX06 L8IGV0	2	http://www.kegg.jp/kegg-bin/show_pathway?ko04080+K09821+K04153
ko04261	Adrenergic signaling in cardiomyocytes	L8HX06	1	http://www.kegg.jp/kegg-bin/show_pathway?ko04261+K09821
ko04270	Vascular smooth muscle contraction	L8HX06 L8HXK3	2	http://www.kegg.jp/kegg-bin/show_pathway?ko04270+K09821+K10352
ko04614	Renin-angiotensin system	L8HX06 L8J0I1	2	http://www.kegg.jp/kegg-bin/show_pathway?ko04614+K09821+K19514
ko04924	Renin secretion	L8HX06	1	http://www.kegg.jp/kegg-bin/show_pathway?ko04924+K09821
ko04925	Aldosterone synthesis and secretion	L8HX06 L8IX69 L8I3L2	3	http://www.kegg.jp/kegg-bin/show_pathway?ko04925+K09821+K12473+K13885
ko04927	Cortisol synthesis and secretion	L8HX06 L8IX69 L8I3L2	3	http://www.kegg.jp/kegg-bin/show_pathway?ko04927+K09821+K12473+K13885
ko04931	Insulin resistance	L8HX06	1	http://www.kegg.jp/kegg-bin/show_pathway?ko04931+K09821
ko04933	AGE-RAGE signaling pathway in diabetic complications	L8HX06 L8I793	2	http://www.kegg.jp/kegg-bin/show_pathway?ko04933+K09821+K04500
ko04934	Cushing syndrome	L8HX06 L8IX69 L8I3L2	3	http://www.kegg.jp/kegg-bin/show_pathway?ko04934+K09821+K12473+K13885
ko05200	Pathways in cancer	L8HX06 L8I793 L8I3S5 L8I7V5 L8IK78 L8J3Q3 L8IGC3 L8J1B9 L8I9K6	9	http://www.kegg.jp/kegg-bin/show_pathway?ko05200+K09821+K04500+K10456+K05089+K20994+K06052+K00510+K05060+K09289
ko05410	Hypertrophic cardiomyopathy	L8HX06	1	http://www.kegg.jp/kegg-bin/show_pathway?ko05410+K09821
ko05414	Dilated cardiomyopathy	L8HX06	1	http://www.kegg.jp/kegg-bin/show_pathway?ko05414+K09821
ko00562	Inositol phosphate metabolism	L8HXP8	1	http://www.kegg.jp/kegg-bin/show_pathway?ko00562+K01803
ko00511	Other glycan degradation	L8J0P6 L8J332 L8HZ02 L8IBA7	4	http://www.kegg.jp/kegg-bin/show_pathway?ko00511+K01206+K01444+K01206+K12373
ko05133	Pertussis	L8IX25	1	http://www.kegg.jp/kegg-bin/show_pathway?ko05133+K04001
ko04211	Longevity regulating pathway	L8HQI2	1	http://www.kegg.jp/kegg-bin/show_pathway?ko04211+K07296
ko04920	Adipocytokine signaling pathway	L8HQI2	1	http://www.kegg.jp/kegg-bin/show_pathway?ko04920+K07296
ko04930	Type II diabetes mellitus	L8HQI2 L8HWY2	2	http://www.kegg.jp/kegg-bin/show_pathway?ko04930+K07296+K00844
ko00770	Pantothenate and CoA biosynthesis	L8J052	1	http://www.kegg.jp/kegg-bin/show_pathway?ko00770+K08069
ko04141	Protein processing in endoplasmic reticulum	L8IDW8 L8I1W1 L8I9I2 L8IB79	4	http://www.kegg.jp/kegg-bin/show_pathway?ko04141+K10950+K09054+K09542+K06689
ko05110	Vibrio cholerae infection	L8IDW8 L8I018 L8IAH1	3	http://www.kegg.jp/kegg-bin/show_pathway?ko05110+K10950+K07937+K02152
ko05417	Lipid and atherosclerosis	L8IDW8 L8I1W1 L8IX69 L8IF42	4	http://www.kegg.jp/kegg-bin/show_pathway?ko05417+K10950+K09054+K12473+K08763
ko05150	Staphylococcus aureus infection	L8IHJ7	1	http://www.kegg.jp/kegg-bin/show_pathway?ko05150+K01333
ko04110	Cell cycle	L8I793	1	http://www.kegg.jp/kegg-bin/show_pathway?ko04110+K04500
ko04144	Endocytosis	L8I793 L8HXR1 L8HWB6 L8I018 L8IHA9 L8IX69	6	http://www.kegg.jp/kegg-bin/show_pathway?ko04144+K04500+K12959+K07897+K07937+K07938+K12473
ko04218	Cellular senescence	L8I793 L8IS69	2	http://www.kegg.jp/kegg-bin/show_pathway?ko04218+K04500+K14381
ko04350	TGF-beta signaling pathway	L8I793 L8IUT8 L8J2M2	3	http://www.kegg.jp/kegg-bin/show_pathway?ko04350+K04500+K06825+K04661
ko04371	Apelin signaling pathway	L8I793 L8J3Q3 L8IX54 L8HVI0	4	http://www.kegg.jp/kegg-bin/show_pathway?ko04371+K04500+K06052+K08341+K06827
ko04550	Signaling pathways regulating pluripotency of stem cells	L8I793 L8J1B9	2	http://www.kegg.jp/kegg-bin/show_pathway?ko04550+K04500+K05060
ko04659	Th17 cell differentiation	L8I793 L8J1B9	2	http://www.kegg.jp/kegg-bin/show_pathway?ko04659+K04500+K05060
ko04926	Relaxin signaling pathway	L8I793	1	http://www.kegg.jp/kegg-bin/show_pathway?ko04926+K04500
ko05142	Chagas disease	L8I793	1	http://www.kegg.jp/kegg-bin/show_pathway?ko05142+K04500
ko05166	Human T-cell leukemia virus 1 infection	L8I793 L8IDK5	2	http://www.kegg.jp/kegg-bin/show_pathway?ko05166+K04500+K00787
ko05205	Proteoglycans in cancer	L8I793 L8HXR1 L8IIF1 L8IAM6 L8I958 L8I109 L8IED3	7	http://www.kegg.jp/kegg-bin/show_pathway?ko05205+K04500+K12959+K03985+K01348+K16336+K06497+K16866
ko05210	Colorectal cancer	L8I793 L8IWR9	2	http://www.kegg.jp/kegg-bin/show_pathway?ko05210+K04500+K09784
ko05212	Pancreatic cancer	L8I793	1	http://www.kegg.jp/kegg-bin/show_pathway?ko05212+K04500
ko05225	Hepatocellular carcinoma	L8I793 L8I3S5 L8IGC3	3	http://www.kegg.jp/kegg-bin/show_pathway?ko05225+K04500+K10456+K00510
ko05226	Gastric cancer	L8I793 L8HND5	2	http://www.kegg.jp/kegg-bin/show_pathway?ko05226+K04500+K05658
ko05321	Inflammatory bowel disease	L8I793 L8IB09	2	http://www.kegg.jp/kegg-bin/show_pathway?ko05321+K04500+K05173
ko04310	Wnt signaling pathway	L8IZ21 L8HZL7	2	http://www.kegg.jp/kegg-bin/show_pathway?ko04310+K19614+K08110
ko00500	Starch and sucrose metabolism	L8HWY2	1	http://www.kegg.jp/kegg-bin/show_pathway?ko00500+K00844
ko00520	Amino sugar and nucleotide sugar metabolism	L8HWY2 L8IBA7 L8HRW8	3	http://www.kegg.jp/kegg-bin/show_pathway?ko00520+K00844+K12373+K01787
ko00521	Streptomycin biosynthesis	L8HWY2	1	http://www.kegg.jp/kegg-bin/show_pathway?ko00521+K00844
ko00524	Neomycin, kanamycin and gentamicin biosynthesis	L8HWY2	1	http://www.kegg.jp/kegg-bin/show_pathway?ko00524+K00844
ko04910	Insulin signaling pathway	L8HWY2	1	http://www.kegg.jp/kegg-bin/show_pathway?ko04910+K00844
ko04973	Carbohydrate digestion and absorption	L8HWY2	1	http://www.kegg.jp/kegg-bin/show_pathway?ko04973+K00844
ko05131	Shigellosis	L8HWY2 L8I018 L8IB79 L8HNI0 L8IFJ0 L8IS69 L8IUR0 L8IX54	8	http://www.kegg.jp/kegg-bin/show_pathway?ko05131+K00844+K07937+K06689+K07369+K23829+K14381+K21348+K08341
ko05034	Alcoholism	L8IMB9	1	http://www.kegg.jp/kegg-bin/show_pathway?ko05034+K11252
ko05203	Viral carcinogenesis	L8IMB9 L8I9H6 L8J1B9	3	http://www.kegg.jp/kegg-bin/show_pathway?ko05203+K11252+K03141+K05060
ko05322	Systemic lupus erythematosus	L8IMB9 L8J5K4	2	http://www.kegg.jp/kegg-bin/show_pathway?ko05322+K11252+K03999
ko04630	JAK-STAT signaling pathway	L8HW49 L8I7V5 L8J1B9	3	http://www.kegg.jp/kegg-bin/show_pathway?ko04630+K14365+K05089+K05060
ko00600	Sphingolipid metabolism	L8J197 L8HX22	2	http://www.kegg.jp/kegg-bin/show_pathway?ko00600+K12348+K00720
ko04071	Sphingolipid signaling pathway	L8J197 L8I5C0	2	http://www.kegg.jp/kegg-bin/show_pathway?ko04071+K12348+K01379
ko00564	Glycerophospholipid metabolism	L8IJX9 L8IY30	2	http://www.kegg.jp/kegg-bin/show_pathway?ko00564+K06129+K16860
ko04510	Focal adhesion	L8HXR1 L8J595 L8I7V5	3	http://www.kegg.jp/kegg-bin/show_pathway?ko04510+K12959+K05450+K05089
ko05100	Bacterial invasion of epithelial cells	L8HXR1	1	http://www.kegg.jp/kegg-bin/show_pathway?ko05100+K12959
ko05418	Fluid shear stress and atherosclerosis	L8HXR1 L8I3S5 L8IS69 L8IGC3 L8I958	5	http://www.kegg.jp/kegg-bin/show_pathway?ko05418+K12959+K10456+K14381+K00510+K16336
ko04530	Tight junction	L8HXK3	1	http://www.kegg.jp/kegg-bin/show_pathway?ko04530+K10352
ko04810	Regulation of actin cytoskeleton	L8HXK3 L8J595 L8I7V5	3	http://www.kegg.jp/kegg-bin/show_pathway?ko04810+K10352+K05450+K05089
ko05130	Pathogenic Escherichia coli infection	L8HXK3 L8I018	2	http://www.kegg.jp/kegg-bin/show_pathway?ko05130+K10352+K07937
ko04140	Autophagy - animal	L8I5C0 L8HWB6 L8J5Y3 L8IAB5 L8IVX7 L8IS69 L8IX54	7	http://www.kegg.jp/kegg-bin/show_pathway?ko04140+K01379+K07897+K23609+K08342+K08512+K14381+K08341
ko04915	Estrogen signaling pathway	L8I5C0	1	http://www.kegg.jp/kegg-bin/show_pathway?ko04915+K01379
ko05152	Tuberculosis	L8I5C0 L8HWB6 L8HNI0	3	http://www.kegg.jp/kegg-bin/show_pathway?ko05152+K01379+K07897+K07369
ko00460	Cyanoamino acid metabolism	L8I966	1	http://www.kegg.jp/kegg-bin/show_pathway?ko00460+K00600
ko00630	Glyoxylate and dicarboxylate metabolism	L8I966	1	http://www.kegg.jp/kegg-bin/show_pathway?ko00630+K00600
ko00670	One carbon pool by folate	L8I966	1	http://www.kegg.jp/kegg-bin/show_pathway?ko00670+K00600
ko01240	Biosynthesis of cofactors	L8I966 L8IC85	2	http://www.kegg.jp/kegg-bin/show_pathway?ko01240+K00600+K01053
ko01523	Antifolate resistance	L8I966	1	http://www.kegg.jp/kegg-bin/show_pathway?ko01523+K00600
ko00100	Steroid biosynthesis	L8IKX5 L8J1X3 L8I662 L8HSH3	4	http://www.kegg.jp/kegg-bin/show_pathway?ko00100+K01052+K07748+K01852+K00511
ko00480	Glutathione metabolism	L8IXW8 L8IPN7	2	http://www.kegg.jp/kegg-bin/show_pathway?ko00480+K05361+K00432
ko04216	Ferroptosis	L8IXW8 L8I2E4 L8HW79 L8IGC3 L8I9K6	5	http://www.kegg.jp/kegg-bin/show_pathway?ko04216+K05361+K06519+K05634+K00510+K09289
ko05143	African trypanosomiasis	L8HT60	1	http://www.kegg.jp/kegg-bin/show_pathway?ko05143+K13823
ko05144	Malaria	L8HT60 L8I958	2	http://www.kegg.jp/kegg-bin/show_pathway?ko05144+K13823+K16336
ko00590	Arachidonic acid metabolism	L8IPN7	1	http://www.kegg.jp/kegg-bin/show_pathway?ko00590+K00432
ko00513	Various types of N-glycan biosynthesis	L8IBA7	1	http://www.kegg.jp/kegg-bin/show_pathway?ko00513+K12373
ko00531	Glycosaminoglycan degradation	L8IBA7	1	http://www.kegg.jp/kegg-bin/show_pathway?ko00531+K12373
ko00603	Glycosphingolipid biosynthesis - globo and isoglobo series	L8IBA7	1	http://www.kegg.jp/kegg-bin/show_pathway?ko00603+K12373
ko00604	Glycosphingolipid biosynthesis - ganglio series	L8IBA7	1	http://www.kegg.jp/kegg-bin/show_pathway?ko00604+K12373
ko04020	Calcium signaling pathway	L8I3R4 L8J595 L8I7V5	3	http://www.kegg.jp/kegg-bin/show_pathway?ko04020+K00476+K05450+K05089
ko04260	Cardiac muscle contraction	L8I3R4	1	http://www.kegg.jp/kegg-bin/show_pathway?ko04260+K00476
ko04137	Mitophagy - animal	L8HWB6 L8I0B0 L8HRK0 L8IS69 L8IUR0 L8IX54	6	http://www.kegg.jp/kegg-bin/show_pathway?ko04137+K07897+K19946+K17987+K14381+K21348+K08341
ko04138	Autophagy - yeast	L8HWB6 L8IAB5 L8IX54	3	http://www.kegg.jp/kegg-bin/show_pathway?ko04138+K07897+K08342+K08341
ko04145	Phagosome	L8HWB6 L8IAH1 L8I3L2 L8IF42	4	http://www.kegg.jp/kegg-bin/show_pathway?ko04145+K07897+K02152+K13885+K08763
ko05132	Salmonella infection	L8HWB6 L8I018 L8HL45 L8IJ79	4	http://www.kegg.jp/kegg-bin/show_pathway?ko05132+K07897+K07937+K23934+K07856
ko05146	Amoebiasis	L8HWB6 L8J5K4 L8I177	3	http://www.kegg.jp/kegg-bin/show_pathway?ko05146+K07897+K03999+K01476
ko04120	Ubiquitin mediated proteolysis	L8I3S5 L8IB79 L8J1T9	3	http://www.kegg.jp/kegg-bin/show_pathway?ko04120+K10456+K06689+K10604
ko04150	mTOR signaling pathway	L8I2E4 L8IAH1	2	http://www.kegg.jp/kegg-bin/show_pathway?ko04150+K06519+K02152
ko04974	Protein digestion and absorption	L8I2E4 L8I870	2	http://www.kegg.jp/kegg-bin/show_pathway?ko04974+K06519+K05616
ko00565	Ether lipid metabolism	L8HWS9 L8IY30	2	http://www.kegg.jp/kegg-bin/show_pathway?ko00565+K01062+K16860
ko04016	MAPK signaling pathway - plant	L8J1K1	1	http://www.kegg.jp/kegg-bin/show_pathway?ko04016+K17686
ko04978	Mineral absorption	L8J1K1 L8IGC3	2	http://www.kegg.jp/kegg-bin/show_pathway?ko04978+K17686+K00510
ko05206	MicroRNAs in cancer	L8I6J8 L8HND5 L8IAM6 L8I7V5 L8IK78 L8IGC3 L8IED3	7	http://www.kegg.jp/kegg-bin/show_pathway?ko05206+K13863+K05658+K01348+K05089+K20994+K00510+K16866
ko00072	Synthesis and degradation of ketone bodies	L8IUU5 L8IKX6	2	http://www.kegg.jp/kegg-bin/show_pathway?ko00072+K00019+K01641
ko00650	Butanoate metabolism	L8IUU5 L8IKX6	2	http://www.kegg.jp/kegg-bin/show_pathway?ko00650+K00019+K01641
ko04514	Cell adhesion molecules	L8IHP9 L8IIZ9 L8I958	3	http://www.kegg.jp/kegg-bin/show_pathway?ko04514+K06781+K06770+K16336
ko04213	Longevity regulating pathway - multiple species	L8I9I2	1	http://www.kegg.jp/kegg-bin/show_pathway?ko04213+K09542
ko04060	Cytokine-cytokine receptor interaction	L8IPF6 L8IB09 L8IA65 L8J1B9 L8IBF2 L8J634	6	http://www.kegg.jp/kegg-bin/show_pathway?ko04060+K21096+K05173+K05171+K05060+K05478+K05149
ko04061	Viral protein interaction with cytokine and cytokine receptor	L8IPF6 L8IB09 L8J1B9	3	http://www.kegg.jp/kegg-bin/show_pathway?ko04061+K21096+K05173+K05060
ko04062	Chemokine signaling pathway	L8IPF6	1	http://www.kegg.jp/kegg-bin/show_pathway?ko04062+K21096
ko02010	ABC transporters	L8HND5	1	http://www.kegg.jp/kegg-bin/show_pathway?ko02010+K05658
ko04976	Bile secretion	L8HND5 L8HUH1 L8IX69 L8I3L2	4	http://www.kegg.jp/kegg-bin/show_pathway?ko04976+K05658+K13855+K12473+K13885
ko05134	Legionellosis	L8I018	1	http://www.kegg.jp/kegg-bin/show_pathway?ko05134+K07937
ko04136	Autophagy - other	L8IAB5 L8IX54	2	http://www.kegg.jp/kegg-bin/show_pathway?ko04136+K08342+K08341
ko04620	Toll-like receptor signaling pathway	L8IMS7 L8IKT6	2	http://www.kegg.jp/kegg-bin/show_pathway?ko04620+K05402+K01371
ko04724	Glutamatergic synapse	L8I491	1	http://www.kegg.jp/kegg-bin/show_pathway?ko04724+K14990
ko04727	GABAergic synapse	L8I491 L8IHZ4 L8IX54	3	http://www.kegg.jp/kegg-bin/show_pathway?ko04727+K14990+K15015+K08341
ko04024	cAMP signaling pathway	L8IGV0	1	http://www.kegg.jp/kegg-bin/show_pathway?ko04024+K04153
ko04726	Serotonergic synapse	L8IGV0 L8I4L3	2	http://www.kegg.jp/kegg-bin/show_pathway?ko04726+K04153+K04520
ko04742	Taste transduction	L8IGV0	1	http://www.kegg.jp/kegg-bin/show_pathway?ko04742+K04153
ko00230	Purine metabolism	L8IGX7 L8I6V6	2	http://www.kegg.jp/kegg-bin/show_pathway?ko00230+K03783+K03783
ko00240	Pyrimidine metabolism	L8IGX7 L8I6V6	2	http://www.kegg.jp/kegg-bin/show_pathway?ko00240+K03783+K03783
ko00760	Nicotinate and nicotinamide metabolism	L8IGX7 L8I6V6	2	http://www.kegg.jp/kegg-bin/show_pathway?ko00760+K03783+K03783
ko04923	Regulation of lipolysis in adipocytes	L8IJN1	1	http://www.kegg.jp/kegg-bin/show_pathway?ko04923+K08753
ko00900	Terpenoid backbone biosynthesis	L8IDK5 L8IKX6	2	http://www.kegg.jp/kegg-bin/show_pathway?ko00900+K00787+K01641
ko05164	Influenza A	L8IDK5 L8IGD5 L8IUR0	3	http://www.kegg.jp/kegg-bin/show_pathway?ko05164+K00787+K15042+K21348
ko04013	MAPK signaling pathway - fly	L8IB79	1	http://www.kegg.jp/kegg-bin/show_pathway?ko04013+K06689
ko04624	Toll and Imd signaling pathway	L8IB79	1	http://www.kegg.jp/kegg-bin/show_pathway?ko04624+K06689
ko03022	Basal transcription factors	L8I9H6	1	http://www.kegg.jp/kegg-bin/show_pathway?ko03022+K03141
ko04151	PI3K-Akt signaling pathway	L8IPA4 L8J595 L8I7V5 L8IWR9	4	http://www.kegg.jp/kegg-bin/show_pathway?ko04151+K16339+K05450+K05089+K09784
ko04721	Synaptic vesicle cycle	L8IAH1 L8IHZ4	2	http://www.kegg.jp/kegg-bin/show_pathway?ko04721+K02152+K15015
ko04966	Collecting duct acid secretion	L8IAH1	1	http://www.kegg.jp/kegg-bin/show_pathway?ko04966+K02152
ko05120	Epithelial cell signaling in Helicobacter pylori infection	L8IAH1	1	http://www.kegg.jp/kegg-bin/show_pathway?ko05120+K02152
ko05165	Human papillomavirus infection	L8IAH1 L8I7V5 L8IK78 L8J3Q3	4	http://www.kegg.jp/kegg-bin/show_pathway?ko05165+K02152+K05089+K20994+K06052
ko05323	Rheumatoid arthritis	L8IAH1 L8IKT6	2	http://www.kegg.jp/kegg-bin/show_pathway?ko05323+K02152+K01371
ko04064	NF-kappa B signaling pathway	L8HNI0 L8IAM6	2	http://www.kegg.jp/kegg-bin/show_pathway?ko04064+K07369+K01348
ko04625	C-type lectin receptor signaling pathway	L8HNI0	1	http://www.kegg.jp/kegg-bin/show_pathway?ko04625+K07369
ko04660	T cell receptor signaling pathway	L8HNI0	1	http://www.kegg.jp/kegg-bin/show_pathway?ko04660+K07369
ko04662	B cell receptor signaling pathway	L8HNI0	1	http://www.kegg.jp/kegg-bin/show_pathway?ko04662+K07369
ko04130	SNARE interactions in vesicular transport	L8IVX7 L8I7Q8	2	http://www.kegg.jp/kegg-bin/show_pathway?ko04130+K08512+K08498
ko01521	EGFR tyrosine kinase inhibitor resistance	L8J595 L8I7V5 L8IXI6	3	http://www.kegg.jp/kegg-bin/show_pathway?ko01521+K05450+K05089+K05115
ko04010	MAPK signaling pathway	L8J595 L8I7V5 L8IWR9	3	http://www.kegg.jp/kegg-bin/show_pathway?ko04010+K05450+K05089+K09784
ko04014	Ras signaling pathway	L8J595 L8I7V5	2	http://www.kegg.jp/kegg-bin/show_pathway?ko04014+K05450+K05089
ko04015	Rap1 signaling pathway	L8J595 L8I7V5	2	http://www.kegg.jp/kegg-bin/show_pathway?ko04015+K05450+K05089
ko04540	Gap junction	L8J595 L8I7V5 L8IWP2	3	http://www.kegg.jp/kegg-bin/show_pathway?ko04540+K05450+K05089+K07372
ko05215	Prostate cancer	L8J595 L8IAM6 L8I7V5	3	http://www.kegg.jp/kegg-bin/show_pathway?ko05215+K05450+K01348+K05089
ko05218	Melanoma	L8J595 L8I7V5	2	http://www.kegg.jp/kegg-bin/show_pathway?ko05218+K05450+K05089
ko05231	Choline metabolism in cancer	L8J595 L8I7V5	2	http://www.kegg.jp/kegg-bin/show_pathway?ko05231+K05450+K05089
ko05202	Transcriptional misregulation in cancer	L8IAM6	1	http://www.kegg.jp/kegg-bin/show_pathway?ko05202+K01348
ko03015	mRNA surveillance pathway	L8IDJ1	1	http://www.kegg.jp/kegg-bin/show_pathway?ko03015+K11125
ko04360	Axon guidance	L8HUD1 L8J224 L8IVA1	3	http://www.kegg.jp/kegg-bin/show_pathway?ko04360+K07521+K05105+K06840
ko04668	TNF signaling pathway	L8IB09 L8J3Q3 L8IM29	3	http://www.kegg.jp/kegg-bin/show_pathway?ko04668+K05173+K06052+K07763
ko05214	Glioma	L8I7V5	1	http://www.kegg.jp/kegg-bin/show_pathway?ko05214+K05089
ko00220	Arginine biosynthesis	L8I177	1	http://www.kegg.jp/kegg-bin/show_pathway?ko00220+K01476
ko00330	Arginine and proline metabolism	L8I177	1	http://www.kegg.jp/kegg-bin/show_pathway?ko00330+K01476
ko01522	Endocrine resistance	L8IK78 L8J3Q3	2	http://www.kegg.jp/kegg-bin/show_pathway?ko01522+K20994+K06052
ko04320	Dorso-ventral axis formation	L8IK78	1	http://www.kegg.jp/kegg-bin/show_pathway?ko04320+K20994
ko04330	Notch signaling pathway	L8IK78 L8J3Q3	2	http://www.kegg.jp/kegg-bin/show_pathway?ko04330+K20994+K06052
ko04658	Th1 and Th2 cell differentiation	L8IK78 L8J3Q3	2	http://www.kegg.jp/kegg-bin/show_pathway?ko04658+K20994+K06052
ko05224	Breast cancer	L8IK78 L8J3Q3	2	http://www.kegg.jp/kegg-bin/show_pathway?ko05224+K20994+K06052
ko01040	Biosynthesis of unsaturated fatty acids	L8IUY7	1	http://www.kegg.jp/kegg-bin/show_pathway?ko01040+K00507
ko04212	Longevity regulating pathway - worm	L8IUY7 L8IX54	2	http://www.kegg.jp/kegg-bin/show_pathway?ko04212+K00507+K08341
ko05032	Morphine addiction	L8IHZ4	1	http://www.kegg.jp/kegg-bin/show_pathway?ko05032+K15015
ko05033	Nicotine addiction	L8IHZ4	1	http://www.kegg.jp/kegg-bin/show_pathway?ko05033+K15015
ko04217	Necroptosis	L8IS69	1	http://www.kegg.jp/kegg-bin/show_pathway?ko04217+K14381
ko04380	Osteoclast differentiation	L8IS69 L8IKT6	2	http://www.kegg.jp/kegg-bin/show_pathway?ko04380+K14381+K01371
ko00909	Sesquiterpenoid and triterpenoid biosynthesis	L8HSH3	1	http://www.kegg.jp/kegg-bin/show_pathway?ko00909+K00511
ko00860	Porphyrin and chlorophyll metabolism	L8IGC3	1	http://www.kegg.jp/kegg-bin/show_pathway?ko00860+K00510
ko04361	Axon regeneration	L8I958	1	http://www.kegg.jp/kegg-bin/show_pathway?ko04361+K16336
ko04340	Hedgehog signaling pathway	L8J1T9	1	http://www.kegg.jp/kegg-bin/show_pathway?ko04340+K10604
ko04970	Salivary secretion	L8HUH1	1	http://www.kegg.jp/kegg-bin/show_pathway?ko04970+K13855
ko04971	Gastric acid secretion	L8HUH1	1	http://www.kegg.jp/kegg-bin/show_pathway?ko04971+K13855
ko04972	Pancreatic secretion	L8HUH1	1	http://www.kegg.jp/kegg-bin/show_pathway?ko04972+K13855
ko04913	Ovarian steroidogenesis	L8IX69 L8I3L2	2	http://www.kegg.jp/kegg-bin/show_pathway?ko04913+K12473+K13885
ko05145	Toxoplasmosis	L8IX69	1	http://www.kegg.jp/kegg-bin/show_pathway?ko05145+K12473
ko05160	Hepatitis C	L8IX69 L8I3L2	2	http://www.kegg.jp/kegg-bin/show_pathway?ko05160+K12473+K13885
ko04068	FoxO signaling pathway	L8IX54	1	http://www.kegg.jp/kegg-bin/show_pathway?ko04068+K08341
ko04139	Mitophagy - yeast	L8IX54	1	http://www.kegg.jp/kegg-bin/show_pathway?ko04139+K08341
ko05167	Kaposi sarcoma-associated herpesvirus infection	L8IX54 L8J1B9	2	http://www.kegg.jp/kegg-bin/show_pathway?ko05167+K08341+K05060
ko04975	Fat digestion and absorption	L8I3L2	1	http://www.kegg.jp/kegg-bin/show_pathway?ko04975+K13885
ko04977	Vitamin digestion and absorption	L8I3L2	1	http://www.kegg.jp/kegg-bin/show_pathway?ko04977+K13885
ko04012	ErbB signaling pathway	L8IWR9	1	http://www.kegg.jp/kegg-bin/show_pathway?ko04012+K09784
ko00280	Valine, leucine and isoleucine degradation	L8IKX6	1	http://www.kegg.jp/kegg-bin/show_pathway?ko00280+K01641
ko05216	Thyroid cancer	L8I9K6	1	http://www.kegg.jp/kegg-bin/show_pathway?ko05216+K09289
ko05412	Arrhythmogenic right ventricular cardiomyopathy	L8IWP2	1	http://www.kegg.jp/kegg-bin/show_pathway?ko05412+K07372
ko04912	GnRH signaling pathway	L8IM29	1	http://www.kegg.jp/kegg-bin/show_pathway?ko04912+K07763
ko04928	Parathyroid hormone synthesis, secretion and action	L8IM29	1	http://www.kegg.jp/kegg-bin/show_pathway?ko04928+K07763
ko00053	Ascorbate and aldarate metabolism	L8IC85	1	http://www.kegg.jp/kegg-bin/show_pathway?ko00053+K01053
ko00930	Caprolactam degradation	L8IC85	1	http://www.kegg.jp/kegg-bin/show_pathway?ko00930+K01053
ko01220	Degradation of aromatic compounds	L8IC85	1	http://www.kegg.jp/kegg-bin/show_pathway?ko01220+K01053

## Sheet: enrichment
Map ID	Map Name	#Diff	P_Value	FDR	Over/Under	DiffSeqs
ko04610	Complement and coagulation cascades	10	5.7542e-06	0.00134073	Over	L8J2N7 L8IIU6 L8I798 L8IX25 L8IHJ7 L8IU68 L8IIF1 L8I612 L8IAM6 L8J5K4
ko04142	Lysosome	14	2.02537e-05	0.00235956	Over	L8HX98 L8I0I4 L8J0P6 L8I9A3 L8J332 L8J197 L8IJX9 L8I5C0 L8IKX5 L8HW02 L8HZ02 L8IBA7 L8IKT6 L8I109
ko04979	Cholesterol metabolism	7	9.34865e-05	0.00693298	Over	L8HTX7 L8IKX5 L8II73 L8IHQ3 L8I9E0 L8IX69 L8I3L2
ko00010	Glycolysis / Gluconeogenesis	8	0.000119021	0.00693298	Over	L8HV64 L8HZ66 L8I8E6 L8ICD6 L8IZX3 L8HXP8 L8HWY2 L8J0U4
ko05230	Central carbon metabolism in cancer	7	0.000308887	0.0143941	Over	L8HV64 L8I8E6 L8ICD6 L8J274 L8HWY2 L8I870 L8I7V5
ko04066	HIF-1 signaling pathway	8	0.00115553	0.0448732	Over	L8HV64 L8HZ66 L8ICD6 L8IZX3 L8J274 L8HWY2 L8J0U4 L8IGC3
ko03320	PPAR signaling pathway	7	0.00180408	0.0600501	Over	L8HTX7 L8HQI2 L8IJN1 L8IHQ3 L8IUY7 L8IKX6 L8IF42
ko04060	Cytokine-cytokine receptor interaction	6	0.00210303	0.0612507	Over	L8IPF6 L8IB09 L8IA65 L8J1B9 L8IBF2 L8J634
ko00511	Other glycan degradation	4	0.00243375	0.0630071	Over	L8J0P6 L8J332 L8HZ02 L8IBA7
ko01110	Biosynthesis of secondary metabolites	21	0.00310552	0.0695557	Over	L8HV64 L8HZ66 L8I8E6 L8ICD6 L8IZX3 L8HXP8 L8HWY2 L8J0U4 L8I966 L8J1X3 L8IGX7 L8IDK5 L8I6V6 L8IPA4 L8I662 L8I177 L8HSH3 L8IGC3 L8IY30 L8IKX6 L8IC85
ko00680	Methane metabolism	4	0.0038296	0.0695557	Over	L8HV64 L8I8E6 L8J0U4 L8I966
ko00100	Steroid biosynthesis	4	0.0038296	0.0695557	Over	L8IKX5 L8J1X3 L8I662 L8HSH3
ko01230	Biosynthesis of amino acids	8	0.00388079	0.0695557	Over	L8HV64 L8HZ66 L8I8E6 L8IZX3 L8HXP8 L8J0U4 L8I966 L8I177
ko01200	Carbon metabolism	9	0.00455149	0.0757498	Over	L8HV64 L8HZ66 L8I8E6 L8IZX3 L8HXP8 L8HWY2 L8J0U4 L8I966 L8IC85
ko00051	Fructose and mannose metabolism	4	0.00568252	0.0827517	Over	L8HV64 L8HXP8 L8HWY2 L8J0U4
ko00710	Carbon fixation in photosynthetic organisms	4	0.00568252	0.0827517	Over	L8HZ66 L8IZX3 L8HXP8 L8J0U4
ko04216	Ferroptosis	5	0.00717488	0.098338	Over	L8IXW8 L8I2E4 L8HW79 L8IGC3 L8I9K6
ko05016	Huntington disease	2	0.00780398	0.101018	Under	L8I7C0 L8IPN7
ko04061	Viral protein interaction with cytokine and cytokine receptor	3	0.0102469	0.121857	Over	L8IPF6 L8IB09 L8J1B9
ko04137	Mitophagy - animal	6	0.0105019	0.121857	Over	L8HWB6 L8I0B0 L8HRK0 L8IS69 L8IUR0 L8IX54
ko04976	Bile secretion	4	0.0109828	0.121857	Over	L8HND5 L8HUH1 L8IX69 L8I3L2
ko04714	Thermogenesis	1	0.01395	0.147743	Under	L8I7C0
ko00072	Synthesis and degradation of ketone bodies	2	0.0146136	0.148042	Over	L8IUU5 L8IKX6
ko01120	Microbial metabolism in diverse environments	10	0.0276245	0.268188	Over	L8HV64 L8HZ66 L8I8E6 L8ICD6 L8IZX3 L8HXP8 L8HWY2 L8J0U4 L8I966 L8IC85
ko05206	MicroRNAs in cancer	7	0.0311112	0.289956	Over	L8I6J8 L8HND5 L8IAM6 L8I7V5 L8IK78 L8IGC3 L8IED3
ko05012	Parkinson disease	2	0.0328638	0.29451	Under	L8I7C0 L8I1W1
ko04927	Cortisol synthesis and secretion	3	0.0389966	0.336526	Over	L8HX06 L8IX69 L8I3L2
ko04614	Renin-angiotensin system	2	0.0442402	0.355447	Over	L8HX06 L8J0I1
ko00650	Butanoate metabolism	2	0.0442402	0.355447	Over	L8IUU5 L8IKX6
ko00030	Pentose phosphate pathway	3	0.0493121	0.382991	Over	L8HV64 L8J0U4 L8IC85
ko00062	Fatty acid elongation	3	0.0608109	0.457063	Over	L8I0I4 L8I9A3 L8IPA4
ko00524	Neomycin, kanamycin and gentamicin biosynthesis	1	0.0716296	0.462437	Over	L8HWY2
ko00460	Cyanoamino acid metabolism	1	0.0716296	0.462437	Over	L8I966
ko05033	Nicotine addiction	1	0.0716296	0.462437	Over	L8IHZ4
ko00909	Sesquiterpenoid and triterpenoid biosynthesis	1	0.0716296	0.462437	Over	L8HSH3
ko00520	Amino sugar and nucleotide sugar metabolism	3	0.0734342	0.462437	Over	L8HWY2 L8IBA7 L8HRW8
ko04727	GABAergic synapse	3	0.0734342	0.462437	Over	L8I491 L8IHZ4 L8IX54
ko04930	Type II diabetes mellitus	2	0.0844793	0.507439	Over	L8HQI2 L8HWY2
ko04140	Autophagy - animal	7	0.0869222	0.507439	Over	L8I5C0 L8HWB6 L8J5Y3 L8IAB5 L8IVX7 L8IS69 L8IX54
ko04925	Aldosterone synthesis and secretion	3	0.087114	0.507439	Over	L8HX06 L8IX69 L8I3L2
ko00052	Galactose metabolism	2	0.107461	0.582286	Over	L8HV64 L8HWY2
ko04978	Mineral absorption	2	0.107461	0.582286	Over	L8J1K1 L8IGC3
ko04913	Ovarian steroidogenesis	2	0.107461	0.582286	Over	L8IX69 L8I3L2
ko04514	Cell adhesion molecules	3	0.117339	0.621366	Over	L8IHP9 L8IIZ9 L8I958
ko00760	Nicotinate and nicotinamide metabolism	2	0.131853	0.682706	Over	L8IGX7 L8I6V6
ko01220	Degradation of aromatic compounds	1	0.138145	0.699736	Over	L8IC85
ko05020	Prion disease	4	0.141396	0.700963	Under	L8I7C0 L8HXR1 L8HW79 L8J5K4
ko04540	Gap junction	3	0.150842	0.732214	Over	L8J595 L8I7V5 L8IWP2
ko05144	Malaria	2	0.157339	0.743136	Over	L8HT60 L8I958
ko05010	Alzheimer disease	5	0.165166	0.743136	Under	L8I7C0 L8I1W1 L8I9E0 L8IGK5 L8I4L3
ko05110	Vibrio cholerae infection	3	0.168613	0.743136	Over	L8IDW8 L8I018 L8IAH1
ko04530	Tight junction	1	0.179981	0.743136	Under	L8HXK3
ko04080	Neuroactive ligand-receptor interaction	2	0.183637	0.743136	Over	L8HX06 L8IGV0
ko00565	Ether lipid metabolism	2	0.183637	0.743136	Over	L8HWS9 L8IY30
ko00900	Terpenoid backbone biosynthesis	2	0.183637	0.743136	Over	L8IDK5 L8IKX6
ko04330	Notch signaling pathway	2	0.183637	0.743136	Over	L8IK78 L8J3Q3
ko04350	TGF-beta signaling pathway	3	0.186953	0.743136	Over	L8I793 L8IUT8 L8J2M2
ko00521	Streptomycin biosynthesis	1	0.199911	0.743136	Over	L8HWY2
ko04742	Taste transduction	1	0.199911	0.743136	Over	L8IGV0
ko00930	Caprolactam degradation	1	0.199911	0.743136	Over	L8IC85
ko05418	Fluid shear stress and atherosclerosis	5	0.205044	0.743136	Over	L8HXR1 L8I3S5 L8IS69 L8IGC3 L8I958
ko04630	JAK-STAT signaling pathway	3	0.205778	0.743136	Over	L8HW49 L8I7V5 L8J1B9
ko05205	Proteoglycans in cancer	7	0.208712	0.743136	Over	L8I793 L8HXR1 L8IIF1 L8IAM6 L8I958 L8I109 L8IED3
ko00260	Glycine, serine and threonine metabolism	2	0.210502	0.743136	Over	L8I8E6 L8I966
ko05321	Inflammatory bowel disease	2	0.210502	0.743136	Over	L8I793 L8IB09
ko04136	Autophagy - other	2	0.210502	0.743136	Over	L8IAB5 L8IX54
ko01212	Fatty acid metabolism	3	0.22501	0.748963	Over	L8I0I4 L8I9A3 L8IUY7
ko01521	EGFR tyrosine kinase inhibitor resistance	3	0.22501	0.748963	Over	L8J595 L8I7V5 L8IXI6
ko05215	Prostate cancer	3	0.22501	0.748963	Over	L8J595 L8IAM6 L8I7V5
ko04668	TNF signaling pathway	3	0.22501	0.748963	Over	L8IB09 L8J3Q3 L8IM29
ko05130	Pathogenic Escherichia coli infection	2	0.234277	0.758745	Under	L8HXK3 L8I018
ko04918	Thyroid hormone synthesis	2	0.237719	0.758745	Over	L8ICD7 L8IPN7
ko04974	Protein digestion and absorption	2	0.237719	0.758745	Over	L8I2E4 L8I870
ko00603	Glycosphingolipid biosynthesis - globo and isoglobo series	1	0.257265	0.788721	Over	L8IBA7
ko00604	Glycosphingolipid biosynthesis - ganglio series	1	0.257265	0.788721	Over	L8IBA7
ko04320	Dorso-ventral axis formation	1	0.257265	0.788721	Over	L8IK78
ko04072	Phospholipase D signaling pathway	4	0.276998	0.835252	Over	L8HX06 L8I018 L8J595 L8I7V5
ko05171	Coronavirus disease - COVID-19	3	0.279612	0.835252	Under	L8I798 L8J5K4 L8J1B9
ko04973	Carbohydrate digestion and absorption	1	0.310522	0.875396	Over	L8HWY2
ko00590	Arachidonic acid metabolism	1	0.310522	0.875396	Over	L8IPN7
ko04977	Vitamin digestion and absorption	1	0.310522	0.875396	Over	L8I3L2
ko00053	Ascorbate and aldarate metabolism	1	0.310522	0.875396	Over	L8IC85
ko05132	Salmonella infection	4	0.31814	0.875396	Under	L8HWB6 L8I018 L8HL45 L8IJ79
ko05323	Rheumatoid arthritis	2	0.319725	0.875396	Over	L8IAH1 L8IKT6
ko00190	Oxidative phosphorylation	2	0.323108	0.875396	Under	L8I7C0 L8IAH1
ko05166	Human T-cell leukemia virus 1 infection	2	0.323108	0.875396	Under	L8I793 L8IDK5
ko00600	Sphingolipid metabolism	2	0.34671	0.915907	Over	L8J197 L8HX22
ko04721	Synaptic vesicle cycle	2	0.34671	0.915907	Over	L8IAH1 L8IHZ4
ko04016	MAPK signaling pathway - plant	1	0.359972	0.915907	Over	L8J1K1
ko03015	mRNA surveillance pathway	1	0.362168	0.915907	Under	L8IDJ1
ko04217	Necroptosis	1	0.366448	0.915907	Under	L8IS69
ko04726	Serotonergic synapse	2	0.373333	0.915907	Over	L8IGV0 L8I4L3
ko04130	SNARE interactions in vesicular transport	2	0.373333	0.915907	Over	L8IVX7 L8I7Q8
ko05218	Melanoma	2	0.373333	0.915907	Over	L8J595 L8I7V5
ko04062	Chemokine signaling pathway	1	0.373439	0.915907	Under	L8IPF6
ko00531	Glycosaminoglycan degradation	1	0.405887	0.95527	Over	L8IBA7
ko04923	Regulation of lipolysis in adipocytes	1	0.405887	0.95527	Over	L8IJN1
ko00220	Arginine biosynthesis	1	0.405887	0.95527	Over	L8I177
ko04975	Fat digestion and absorption	1	0.405887	0.95527	Over	L8I3L2
ko04932	Non-alcoholic fatty liver disease	2	0.439111	0.990092	Under	L8I7C0 L8HQI2
ko00500	Starch and sucrose metabolism	1	0.44852	0.990092	Over	L8HWY2
ko05143	African trypanosomiasis	1	0.44852	0.990092	Over	L8HT60
ko02010	ABC transporters	1	0.44852	0.990092	Over	L8HND5
ko04934	Cushing syndrome	3	0.448575	0.990092	Over	L8HX06 L8IX69 L8I3L2
ko04138	Autophagy - yeast	3	0.448575	0.990092	Over	L8HWB6 L8IAB5 L8IX54
ko04922	Glucagon signaling pathway	3	0.471668	0.990092	Over	L8HV64 L8I8E6 L8ICD6
ko04020	Calcium signaling pathway	3	0.471668	0.990092	Over	L8I3R4 L8J595 L8I7V5
ko05203	Viral carcinogenesis	3	0.484031	0.990092	Under	L8IMB9 L8I9H6 L8J1B9
ko00640	Propanoate metabolism	1	0.488103	0.990092	Over	L8ICD6
ko00770	Pantothenate and CoA biosynthesis	1	0.488103	0.990092	Over	L8J052
ko05150	Staphylococcus aureus infection	1	0.488103	0.990092	Over	L8IHJ7
ko00670	One carbon pool by folate	1	0.488103	0.990092	Over	L8I966
ko04390	Hippo signaling pathway	3	0.496745	0.990092	Over	L8IT90 L8I793 L8HVI0
ko03018	RNA degradation	1	0.51238	0.990092	Under	L8HV64
ko04110	Cell cycle	1	0.51238	0.990092	Under	L8I793
ko04024	cAMP signaling pathway	1	0.51238	0.990092	Under	L8IGV0
ko05014	Amyotrophic lateral sclerosis	8	0.513995	0.990092	Under	L8I7C0 L8IE45 L8IPN7 L8J5Y3 L8I1W1 L8I0B0 L8IS69 L8IX54
ko05145	Toxoplasmosis	1	0.516502	0.990092	Under	L8IX69
ko04068	FoxO signaling pathway	1	0.5198	0.990092	Under	L8IX54
ko05415	Diabetic cardiomyopathy	4	0.52334	0.990092	Under	L8I7C0 L8HX06 L8I793 L8I5C0
ko04910	Insulin signaling pathway	1	0.523847	0.990092	Under	L8HWY2
ko04966	Collecting duct acid secretion	1	0.524855	0.990092	Over	L8IAH1
ko05131	Shigellosis	8	0.528872	0.990092	Over	L8HWY2 L8I018 L8IB79 L8HNI0 L8IFJ0 L8IS69 L8IUR0 L8IX54
ko05022	Pathways of neurodegeneration - multiple diseases	9	0.53245	0.990092	Under	L8I7C0 L8IPN7 L8J5Y3 L8I1W1 L8HW79 L8I0B0 L8IS69 L8IX54 L8I4L3
ko04371	Apelin signaling pathway	4	0.533963	0.990092	Over	L8I793 L8J3Q3 L8IX54 L8HVI0
ko04145	Phagosome	4	0.553393	0.990092	Over	L8HWB6 L8IAH1 L8I3L2 L8IF42
ko00630	Glyoxylate and dicarboxylate metabolism	1	0.558976	0.990092	Over	L8I966
ko05032	Morphine addiction	1	0.558976	0.990092	Over	L8IHZ4
ko00860	Porphyrin and chlorophyll metabolism	1	0.558976	0.990092	Over	L8IGC3
ko04340	Hedgehog signaling pathway	1	0.558976	0.990092	Over	L8J1T9
ko04621	NOD-like receptor signaling pathway	2	0.579101	0.990092	Under	L8IH11 L8IX54
ko01240	Biosynthesis of cofactors	2	0.58006	0.990092	Under	L8I966 L8IC85
ko05167	Kaposi sarcoma-associated herpesvirus infection	2	0.58006	0.990092	Under	L8IX54 L8J1B9
ko04218	Cellular senescence	2	0.583664	0.990092	Under	L8I793 L8IS69
ko04924	Renin secretion	1	0.590656	0.990092	Over	L8HX06
ko01523	Antifolate resistance	1	0.590656	0.990092	Over	L8I966
ko01040	Biosynthesis of unsaturated fatty acids	1	0.590656	0.990092	Over	L8IUY7
ko04970	Salivary secretion	1	0.590656	0.990092	Over	L8HUH1
ko05216	Thyroid cancer	1	0.590656	0.990092	Over	L8I9K6
ko04510	Focal adhesion	3	0.625583	1	Under	L8HXR1 L8J595 L8I7V5
ko04810	Regulation of actin cytoskeleton	3	0.625583	1	Under	L8HXK3 L8J595 L8I7V5
ko04010	MAPK signaling pathway	3	0.625583	1	Under	L8J595 L8I7V5 L8IWR9
ko04550	Signaling pathways regulating pluripotency of stem cells	2	0.642301	1	Over	L8I793 L8J1B9
ko00564	Glycerophospholipid metabolism	2	0.65048	1	Over	L8IJX9 L8IY30
ko00480	Glutathione metabolism	2	0.65048	1	Over	L8IXW8 L8IPN7
ko04141	Protein processing in endoplasmic reticulum	4	0.656568	1	Under	L8IDW8 L8I1W1 L8I9I2 L8IB79
ko05165	Human papillomavirus infection	4	0.657862	1	Under	L8IAH1 L8I7V5 L8IK78 L8J3Q3
ko03420	Nucleotide excision repair	2	0.659332	1	Over	L8HYH0 L8I9H6
ko00270	Cysteine and methionine metabolism	2	0.659332	1	Over	L8J0L8 L8ICD6
ko05322	Systemic lupus erythematosus	2	0.66872	1	Over	L8IMB9 L8J5K4
ko04658	Th1 and Th2 cell differentiation	2	0.66872	1	Over	L8IK78 L8J3Q3
ko04620	Toll-like receptor signaling pathway	2	0.678521	1	Over	L8IMS7 L8IKT6
ko05231	Choline metabolism in cancer	2	0.678521	1	Over	L8J595 L8I7V5
ko01100	Metabolic pathways	34	0.697591	1	Over	L8I7C0 L8I0I4 L8HV64 L8HZ66 L8I8E6 L8J0L8 L8ICD6 L8IZX3 L8HXP8 L8I9A3 L8HWY2 L8J197 L8J0U4 L8I966 L8IXW8 L8IPN7 L8IBA7 L8HWS9 L8IUU5 L8J1X3 L8IGX7 L8IDK5 L8I6V6 L8IAH1 L8I662 L8I177 L8IUY7 L8HSH3 L8HRW8 L8IGC3 L8HX22 L8IY30 L8IKX6 L8IC85
ko00240	Pyrimidine metabolism	2	0.698947	1	Over	L8IGX7 L8I6V6
ko05224	Breast cancer	2	0.709396	1	Over	L8IK78 L8J3Q3
ko05100	Bacterial invasion of epithelial cells	1	0.718115	1	Under	L8HXR1
ko04660	T cell receptor signaling pathway	1	0.718115	1	Under	L8HNI0
ko04931	Insulin resistance	1	0.718171	1	Under	L8HX06
ko04666	Fc gamma R-mediated phagocytosis	1	0.720478	1	Under	L8HZM0
ko04926	Relaxin signaling pathway	1	0.720478	1	Under	L8I793
ko04915	Estrogen signaling pathway	1	0.720478	1	Under	L8I5C0
ko04625	C-type lectin receptor signaling pathway	1	0.722615	1	Under	L8HNI0
ko04146	Peroxisome	1	0.725333	1	Under	L8IBZ3
ko05212	Pancreatic cancer	1	0.725333	1	Under	L8I793
ko05202	Transcriptional misregulation in cancer	1	0.725333	1	Under	L8IAM6
ko05142	Chagas disease	1	0.728578	1	Under	L8I793
ko05034	Alcoholism	1	0.728578	1	Under	L8IMB9
ko05146	Amoebiasis	3	0.732298	1	Over	L8HWB6 L8J5K4 L8I177
ko04360	Axon guidance	3	0.732298	1	Over	L8HUD1 L8J224 L8IVA1
ko04152	AMPK signaling pathway	3	0.736443	1	Over	L8HV64 L8HQI2 L8IUY7
ko04723	Retrograde endocannabinoid signaling	2	0.766284	1	Under	L8I7C0 L8IHZ4
ko04014	Ras signaling pathway	2	0.768866	1	Under	L8J595 L8I7V5
ko04613	Neutrophil extracellular trap formation	2	0.772397	1	Under	L8I798 L8IMB9
ko04151	PI3K-Akt signaling pathway	4	0.816282	1	Under	L8IPA4 L8J595 L8I7V5 L8IWR9
ko04612	Antigen processing and presentation	1	1	1	Under	L8HX98
ko05140	Leishmaniasis	1	1	1	Under	L8HZM0
ko04919	Thyroid hormone signaling pathway	2	1	1	Under	L8HV64 L8IK78
ko04611	Platelet activation	2	1	1	Under	L8I798 L8IVX7
ko04210	Apoptosis	3	1	1	Under	L8J4V3 L8I5C0 L8IKT6
ko04214	Apoptosis - fly	1	1	1	Under	L8J4V3
ko01524	Platinum drug resistance	2	1	1	Under	L8HYH0 L8J1K1
ko00620	Pyruvate metabolism	1	1	1	Over	L8ICD6
ko04261	Adrenergic signaling in cardiomyocytes	1	1	1	Under	L8HX06
ko04270	Vascular smooth muscle contraction	2	1	1	Under	L8HX06 L8HXK3
ko04933	AGE-RAGE signaling pathway in diabetic complications	2	1	1	Under	L8HX06 L8I793
ko05200	Pathways in cancer	9	1	1	Under	L8HX06 L8I793 L8I3S5 L8I7V5 L8IK78 L8J3Q3 L8IGC3 L8J1B9 L8I9K6
ko05410	Hypertrophic cardiomyopathy	1	1	1	Under	L8HX06
ko05414	Dilated cardiomyopathy	1	1	1	Under	L8HX06
ko00562	Inositol phosphate metabolism	1	1	1	Under	L8HXP8
ko05133	Pertussis	1	1	1	Under	L8IX25
ko04211	Longevity regulating pathway	1	1	1	Under	L8HQI2
ko04920	Adipocytokine signaling pathway	1	1	1	Under	L8HQI2
ko05417	Lipid and atherosclerosis	4	1	1	Under	L8IDW8 L8I1W1 L8IX69 L8IF42
ko04144	Endocytosis	6	1	1	Under	L8I793 L8HXR1 L8HWB6 L8I018 L8IHA9 L8IX69
ko04659	Th17 cell differentiation	2	1	1	Under	L8I793 L8J1B9
ko05210	Colorectal cancer	2	1	1	Under	L8I793 L8IWR9
ko05225	Hepatocellular carcinoma	3	1	1	Under	L8I793 L8I3S5 L8IGC3
ko05226	Gastric cancer	2	1	1	Under	L8I793 L8HND5
ko04310	Wnt signaling pathway	2	1	1	Under	L8IZ21 L8HZL7
ko04071	Sphingolipid signaling pathway	2	1	1	Under	L8J197 L8I5C0
ko05152	Tuberculosis	3	1	1	Under	L8I5C0 L8HWB6 L8HNI0
ko00513	Various types of N-glycan biosynthesis	1	1	1	Over	L8IBA7
ko04260	Cardiac muscle contraction	1	1	1	Under	L8I3R4
ko04120	Ubiquitin mediated proteolysis	3	1	1	Under	L8I3S5 L8IB79 L8J1T9
ko04150	mTOR signaling pathway	2	1	1	Under	L8I2E4 L8IAH1
ko04213	Longevity regulating pathway - multiple species	1	1	1	Under	L8I9I2
ko05134	Legionellosis	1	1	1	Under	L8I018
ko04724	Glutamatergic synapse	1	1	1	Under	L8I491
ko00230	Purine metabolism	2	1	1	Under	L8IGX7 L8I6V6
ko05164	Influenza A	3	1	1	Under	L8IDK5 L8IGD5 L8IUR0
ko04013	MAPK signaling pathway - fly	1	1	1	Under	L8IB79
ko04624	Toll and Imd signaling pathway	1	1	1	Under	L8IB79
ko03022	Basal transcription factors	1	1	1	Under	L8I9H6
ko05120	Epithelial cell signaling in Helicobacter pylori infection	1	1	1	Under	L8IAH1
ko04064	NF-kappa B signaling pathway	2	1	1	Under	L8HNI0 L8IAM6
ko04662	B cell receptor signaling pathway	1	1	1	Under	L8HNI0
ko04015	Rap1 signaling pathway	2	1	1	Under	L8J595 L8I7V5
ko05214	Glioma	1	1	1	Under	L8I7V5
ko00330	Arginine and proline metabolism	1	1	1	Under	L8I177
ko01522	Endocrine resistance	2	1	1	Under	L8IK78 L8J3Q3
ko04212	Longevity regulating pathway - worm	2	1	1	Under	L8IUY7 L8IX54
ko04380	Osteoclast differentiation	2	1	1	Under	L8IS69 L8IKT6
ko04361	Axon regeneration	1	1	1	Under	L8I958
ko04971	Gastric acid secretion	1	1	1	Under	L8HUH1
ko04972	Pancreatic secretion	1	1	1	Under	L8HUH1
ko05160	Hepatitis C	2	1	1	Under	L8IX69 L8I3L2
ko04139	Mitophagy - yeast	1	1	1	Over	L8IX54
ko04012	ErbB signaling pathway	1	1	1	Under	L8IWR9
ko00280	Valine, leucine and isoleucine degradation	1	1	1	Under	L8IKX6
ko05412	Arrhythmogenic right ventricular cardiomyopathy	1	1	1	Under	L8IWP2
ko04912	GnRH signaling pathway	1	1	1	Under	L8IM29
ko04928	Parathyroid hormone synthesis, secretion and action	1	1	1	Under	L8IM29
