# Supplementary material for: Combined transcriptome and proteome analysis of yak PASMCs under hypoxic and normoxic conditions
Source: PeerJ. 2022 Nov 25;10:e14369. doi: 10.7717/peerj.14369 (PMC9703989; doi:10.7717/peerj.14369)
Supplement: Supplemental Information 7 [file peerj-10-14369-s007.xlsx]

## Sheet: Pathway
Gene Set Name	Description	Genes in Gene Set	Genes in Overlap	P-value	FDR
bta05022	Pathways of neurodegeneration - multiple diseases	490	171	3.87349e-57	1.23564e-54
bta05010	Alzheimer disease	385	140	1.93556e-49	3.08721e-47
bta05014	Amyotrophic lateral sclerosis	384	137	2.72393e-47	2.89645e-45
bta04151	PI3K-Akt signaling pathway	379	133	5.10136e-45	4.06833e-43
bta05165	Human papillomavirus infection	352	127	1.52691e-44	9.74166e-43
bta04010	MAPK signaling pathway	292	111	1.27607e-41	6.78442e-40
bta05020	Prion disease	282	105	1.70528e-38	7.77119e-37
bta05016	Huntington disease	319	112	3.76797e-38	1.50248e-36
bta04141	Protein processing in endoplasmic reticulum	172	79	5.29909e-37	1.87823e-35
bta05012	Parkinson disease	263	99	7.53875e-37	2.40486e-35
bta05132	Salmonella infection	261	97	1.35798e-35	3.93814e-34
bta04218	Cellular senescence	165	74	6.8268e-34	1.81479e-32
bta04510	Focal adhesion	201	82	9.88432e-34	2.42546e-32
bta05205	Proteoglycans in cancer	204	79	1.07902e-30	2.45862e-29
bta04144	Endocytosis	251	87	1.71009e-29	3.63678e-28
bta04110	Cell cycle	123	58	2.54818e-28	5.08043e-27
bta04142	Lysosome	133	60	6.18127e-28	1.1599e-26
bta04015	Rap1 signaling pathway	217	77	4.91275e-27	8.24825e-26
bta04810	Regulation of actin cytoskeleton	217	77	4.91275e-27	8.24825e-26
bta05169	Epstein-Barr virus infection	235	79	6.38818e-26	1.01892e-24
bta05166	Human T-cell leukemia virus 1 infection	235	78	3.30958e-25	5.02741e-24
bta05415	Diabetic cardiomyopathy	215	74	4.27155e-25	6.19374e-24
bta04150	mTOR signaling pathway	157	62	5.88599e-25	8.16361e-24
bta04722	Neurotrophin signaling pathway	122	52	5.32495e-23	7.07775e-22
bta05225	Hepatocellular carcinoma	174	63	6.1639e-23	7.86514e-22
bta04014	Ras signaling pathway	243	76	8.54911e-23	1.04891e-21
bta04390	Hippo signaling pathway	156	59	1.08556e-22	1.28256e-21
bta05226	Gastric cancer	153	58	2.16438e-22	2.46585e-21
bta05100	Bacterial invasion of epithelial cells	76	40	2.89589e-22	3.0793e-21
bta05212	Pancreatic cancer	76	40	2.89589e-22	3.0793e-21
bta04140	Autophagy - animal	142	55	7.80845e-22	7.78404e-21
bta05163	Human cytomegalovirus infection	251	76	7.73568e-22	7.78404e-21
bta05170	Human immunodeficiency virus 1 infection	242	74	1.3861e-21	1.3399e-20
bta01200	Carbon metabolism	113	48	2.86123e-21	2.6845e-20
bta04714	Thermogenesis	240	73	3.6521e-21	3.32863e-20
bta05161	Hepatitis B	177	61	5.47585e-21	4.85221e-20
bta05222	Small cell lung cancer	94	43	9.76523e-21	8.41921e-20
bta04933	AGE-RAGE signaling pathway in diabetic complications	103	45	1.24184e-20	1.04249e-19
bta04919	Thyroid hormone signaling pathway	121	49	1.34056e-20	1.09651e-19
bta04152	AMPK signaling pathway	123	49	3.10298e-20	2.47463e-19
bta04360	Axon guidance	179	60	5.54591e-20	4.21225e-19
bta05210	Colorectal cancer	89	41	5.54234e-20	4.21225e-19
bta05017	Spinocerebellar ataxia	146	53	1.3483e-19	1.00025e-18
bta04310	Wnt signaling pathway	168	57	2.41664e-19	1.75207e-18
bta04210	Apoptosis	143	52	2.7084e-19	1.91995e-18
bta04066	HIF-1 signaling pathway	110	45	3.00017e-19	2.08055e-18
bta05418	Fluid shear stress and atherosclerosis	145	52	5.50706e-19	3.73777e-18
bta05220	Chronic myeloid leukemia	77	37	5.91903e-19	3.93369e-18
bta05135	Yersinia infection	156	54	7.46491e-19	4.85981e-18
bta04910	Insulin signaling pathway	138	50	1.56354e-18	9.9754e-18
bta04931	Insulin resistance	110	44	2.09875e-18	1.31275e-17
bta03010	Ribosome	166	55	3.485e-18	2.13791e-17
bta04512	ECM-receptor interaction	89	39	3.89959e-18	2.34711e-17
bta05202	Transcriptional misregulation in cancer	201	61	6.96663e-18	4.11547e-17
bta01212	Fatty acid metabolism	58	31	7.76741e-18	4.5051e-17
bta05224	Breast cancer	150	51	1.64035e-17	9.34413e-17
bta01521	EGFR tyrosine kinase inhibitor resistance	80	36	2.58705e-17	1.42288e-16
bta04068	FoxO signaling pathway	131	47	2.58219e-17	1.42288e-16
bta04932	Non-alcoholic fatty liver disease	164	53	4.78953e-17	2.5896e-16
bta03050	Proteasome	47	27	8.56312e-17	4.55272e-16
bta01240	Biosynthesis of cofactors	154	50	2.92497e-16	1.52961e-15
bta00190	Oxidative phosphorylation	140	47	5.17983e-16	2.6651e-15
bta04550	Signaling pathways regulating pluripotency of stem cells	144	47	1.78431e-15	9.03485e-15
bta05203	Viral carcinogenesis	249	65	2.34803e-15	1.17035e-14
bta04114	Oocyte meiosis	119	42	2.42821e-15	1.19169e-14
bta00310	Lysine degradation	68	31	2.6268e-15	1.26962e-14
bta04666	Fc gamma R-mediated phagocytosis	96	37	4.24433e-15	2.00722e-14
bta04926	Relaxin signaling pathway	131	44	4.27872e-15	2.00722e-14
bta04020	Calcium signaling pathway	252	65	4.3869e-15	2.02815e-14
bta03008	Ribosome biogenesis in eukaryotes	87	35	4.91622e-15	2.24039e-14
bta04072	Phospholipase D signaling pathway	153	48	5.12639e-15	2.30327e-14
bta04022	cGMP-PKG signaling pathway	171	51	7.33001e-15	3.2476e-14
bta05171	Coronavirus disease - COVID-19	281	69	9.27533e-15	3.99842e-14
bta05215	Prostate cancer	98	37	9.19588e-15	3.99842e-14
bta04146	Peroxisome	84	34	9.65795e-15	4.10785e-14
bta03030	DNA replication	36	22	1.00394e-14	4.21391e-14
bta04371	Apelin signaling pathway	140	45	1.3237e-14	5.48391e-14
bta04723	Retrograde endocannabinoid signaling	152	47	1.81052e-14	7.40456e-14
bta05206	MicroRNAs in cancer	293	70	2.59298e-14	1.04704e-13
bta04914	Progesterone-mediated oocyte maturation	88	34	4.95926e-14	1.97032e-13
bta05417	Lipid and atherosclerosis	239	61	5.003e-14	1.97032e-13
bta04935	Growth hormone synthesis, secretion and action	118	40	5.20322e-14	2.02418e-13
bta04012	ErbB signaling pathway	84	33	6.60664e-14	2.51137e-13
bta04668	TNF signaling pathway	124	41	6.61301e-14	2.51137e-13
bta04115	p53 signaling pathway	80	32	8.66459e-14	3.25177e-13
bta05211	Renal cell carcinoma	71	30	8.988e-14	3.33392e-13
bta04934	Cushing syndrome	158	47	9.09257e-14	3.33394e-13
bta05152	Tuberculosis	205	55	9.25407e-14	3.3546e-13
bta04024	cAMP signaling pathway	238	60	1.44026e-13	5.16228e-13
bta03013	RNA transport	189	52	1.45673e-13	5.1633e-13
bta05167	Kaposi sarcoma-associated herpesvirus infection	220	57	1.66943e-13	5.85219e-13
bta01230	Biosynthesis of amino acids	73	30	2.18423e-13	7.49214e-13
bta04261	Adrenergic signaling in cardiomyocytes	150	45	2.16187e-13	7.49214e-13
bta05410	Hypertrophic cardiomyopathy	92	34	2.27477e-13	7.7197e-13
bta00970	Aminoacyl-tRNA biosynthesis	44	23	2.5421e-13	8.53609e-13
bta01524	Platinum drug resistance	78	31	2.5886e-13	8.6017e-13
bta01522	Endocrine resistance	94	34	4.68838e-13	1.52612e-12
bta05235	PD-L1 expression and PD-1 checkpoint pathway in cancer	94	34	4.68838e-13	1.52612e-12
bta04625	C-type lectin receptor signaling pathway	105	36	6.30635e-13	2.03205e-12
bta04211	Longevity regulating pathway	90	33	6.59178e-13	2.10278e-12
bta05214	Glioma	77	30	1.15564e-12	3.65e-12
bta05213	Endometrial cancer	59	26	1.2105e-12	3.78579e-12
bta00280	Valine, leucine and isoleucine degradation	51	24	1.51231e-12	4.68377e-12
bta05218	Melanoma	73	29	1.52842e-12	4.68813e-12
bta00230	Purine metabolism	135	41	1.57977e-12	4.79949e-12
bta04120	Ubiquitin mediated proteolysis	148	43	2.4289e-12	7.30961e-12
bta05231	Choline metabolism in cancer	99	34	2.58378e-12	7.70303e-12
bta05162	Measles	160	45	2.65828e-12	7.85176e-12
bta04611	Platelet activation	121	38	3.23877e-12	9.4786e-12
bta04621	NOD-like receptor signaling pathway	192	50	4.03482e-12	1.1701e-11
bta04925	Aldosterone synthesis and secretion	96	33	5.23183e-12	1.50356e-11
bta04370	VEGF signaling pathway	58	25	5.98701e-12	1.70523e-11
bta04070	Phosphatidylinositol signaling system	97	33	7.2451e-12	2.0453e-11
bta05217	Basal cell carcinoma	63	26	7.62598e-12	2.13394e-11
bta04530	Tight junction	178	47	1.03304e-11	2.86558e-11
bta05414	Dilated cardiomyopathy	99	33	1.36791e-11	3.76176e-11
bta04137	Mitophagy - animal	70	27	2.02041e-11	5.46195e-11
bta04520	Adherens junction	70	27	2.02041e-11	5.46195e-11
bta00071	Fatty acid degradation	44	21	2.67272e-11	7.16468e-11
bta00561	Glycerolipid metabolism	67	26	4.03254e-11	1.07198e-10
bta04217	Necroptosis	185	47	4.42822e-11	1.16744e-10
bta04922	Glucagon signaling pathway	103	33	4.59787e-11	1.20223e-10
bta05145	Toxoplasmosis	114	35	4.65366e-11	1.20692e-10
bta04350	TGF-beta signaling pathway	93	31	5.62218e-11	1.44635e-10
bta00564	Glycerophospholipid metabolism	104	33	6.15403e-11	1.55804e-10
bta04670	Leukocyte transendothelial migration	115	35	6.11191e-11	1.55804e-10
bta00330	Arginine and proline metabolism	50	22	6.73027e-11	1.69052e-10
bta04728	Dopaminergic synapse	134	38	9.78193e-11	2.43784e-10
bta05146	Amoebiasis	117	35	1.04252e-10	2.57801e-10
bta04921	Oxytocin signaling pathway	153	41	1.26898e-10	3.11389e-10
bta04145	Phagosome	172	44	1.42285e-10	3.4648e-10
bta00510	N-Glycan biosynthesis	52	22	1.71678e-10	4.14888e-10
bta04071	Sphingolipid signaling pathway	120	35	2.26094e-10	5.42285e-10
bta05216	Thyroid cancer	40	19	2.6194e-10	6.23573e-10
bta05164	Influenza A	188	46	2.74028e-10	6.47518e-10
bta04330	Notch signaling pathway	58	23	3.18376e-10	7.46779e-10
bta05221	Acute myeloid leukemia	68	25	3.70976e-10	8.57172e-10
bta05223	Non-small cell lung cancer	73	26	3.73501e-10	8.57172e-10
bta05230	Central carbon metabolism in cancer	68	25	3.70976e-10	8.57172e-10
bta04721	Synaptic vesicle cycle	79	27	5.04217e-10	1.1489e-09
bta04064	NF-kappa B signaling pathway	112	33	5.45294e-10	1.23368e-09
bta03440	Homologous recombination	42	19	7.46823e-10	1.67772e-09
bta03015	mRNA surveillance pathway	102	31	7.69162e-10	1.71582e-09
bta04380	Osteoclast differentiation	138	37	9.73725e-10	2.15707e-09
bta04918	Thyroid hormone synthesis	76	26	1.02416e-09	2.23773e-09
bta05412	Arrhythmogenic right ventricular cardiomyopathy	76	26	1.02416e-09	2.23773e-09
bta03040	Spliceosome	153	39	1.71456e-09	3.72071e-09
bta05168	Herpes simplex virus 1 infection	416	76	2.65142e-09	5.7149e-09
bta00514	Other types of O-glycan biosynthesis	45	19	3.12613e-09	6.69286e-09
bta04630	JAK-STAT signaling pathway	209	47	3.44774e-09	7.3322e-09
bta00270	Cysteine and methionine metabolism	50	20	3.77436e-09	7.97365e-09
bta04270	Vascular smooth muscle contraction	139	36	4.48858e-09	9.42012e-09
bta04659	Th17 cell differentiation	115	32	4.75266e-09	9.90913e-09
bta05160	Hepatitis C	172	41	5.63558e-09	1.16737e-08
bta04912	GnRH signaling pathway	93	28	6.30799e-09	1.29822e-08
bta04920	Adipocytokine signaling pathway	72	24	8.02421e-09	1.64085e-08
bta03460	Fanconi anemia pathway	52	20	8.45256e-09	1.71743e-08
bta05133	Pertussis	78	25	9.79765e-09	1.97813e-08
bta04915	Estrogen signaling pathway	138	35	1.31196e-08	2.63218e-08
bta04916	Melanogenesis	102	29	1.44455e-08	2.88007e-08
bta05134	Legionellosis	59	21	1.81864e-08	3.6034e-08
bta04216	Ferroptosis	45	18	2.26356e-08	4.45726e-08
bta04750	Inflammatory mediator regulation of TRP channels	110	30	2.35096e-08	4.60097e-08
bta04928	Parathyroid hormone synthesis, secretion and action	105	29	2.94387e-08	5.72618e-08
bta04974	Protein digestion and absorption	130	33	3.28632e-08	6.35355e-08
bta03410	Base excision repair	33	15	4.27481e-08	8.21485e-08
bta04911	Insulin secretion	85	25	6.70664e-08	1.28109e-07
bta05219	Bladder cancer	43	17	6.82277e-08	1.29551e-07
bta04540	Gap junction	92	26	9.03593e-08	1.7056e-07
bta04929	GnRH secretion	65	21	1.25065e-07	2.34681e-07
bta00240	Pyrimidine metabolism	55	19	1.48806e-07	2.77597e-07
bta00480	Glutathione metabolism	61	20	1.88791e-07	3.50141e-07
bta00030	Pentose phosphate pathway	28	13	2.52646e-07	4.65862e-07
bta04213	Longevity regulating pathway - multiple species	62	20	2.55139e-07	4.67756e-07
bta05142	Chagas disease	122	30	2.86937e-07	5.23045e-07
bta00600	Sphingolipid metabolism	52	18	3.04117e-07	5.51212e-07
bta04062	Chemokine signaling pathway	191	40	3.79785e-07	6.84471e-07
bta04978	Mineral absorption	58	19	3.85733e-07	6.91286e-07
bta00062	Fatty acid elongation	29	13	4.20056e-07	7.48591e-07
bta00010	Glycolysis / Gluconeogenesis	64	20	4.55742e-07	8.07676e-07
bta00900	Terpenoid backbone biosynthesis	21	11	4.60929e-07	8.12356e-07
bta04971	Gastric acid secretion	76	22	5.47166e-07	9.59043e-07
bta00620	Pyruvate metabolism	44	16	6.37996e-07	1.11214e-06
bta00630	Glyoxylate and dicarboxylate metabolism	30	13	6.80011e-07	1.17256e-06
bta01040	Biosynthesis of unsaturated fatty acids	30	13	6.80011e-07	1.17256e-06
bta04725	Cholinergic synapse	114	28	7.21797e-07	1.23792e-06
bta00061	Fatty acid biosynthesis	18	10	7.60308e-07	1.297e-06
bta00562	Inositol phosphate metabolism	72	21	8.56868e-07	1.45394e-06
bta03320	PPAR signaling pathway	84	23	9.05274e-07	1.52326e-06
bta03420	Nucleotide excision repair	45	16	9.07268e-07	1.52326e-06
bta04620	Toll-like receptor signaling pathway	116	28	1.05207e-06	1.75712e-06
bta03018	RNA degradation	79	22	1.13391e-06	1.88394e-06
bta00563	Glycosylphosphatidylinositol (GPI)-anchor biosynthesis	27	12	1.31857e-06	2.17939e-06
bta04720	Long-term potentiation	69	20	1.72847e-06	2.8276e-06
bta05031	Amphetamine addiction	69	20	1.72847e-06	2.8276e-06
bta05323	Rheumatoid arthritis	106	26	1.81929e-06	2.96099e-06
bta04713	Circadian entrainment	101	25	2.38494e-06	3.8619e-06
bta05030	Cocaine addiction	48	16	2.4356e-06	3.92402e-06
bta00513	Various types of N-glycan biosynthesis	43	15	2.61612e-06	4.19369e-06
bta00100	Steroid biosynthesis	20	10	2.7108e-06	4.32373e-06
bta04660	T cell receptor signaling pathway	109	26	3.18333e-06	5.05215e-06
bta00603	Glycosphingolipid biosynthesis - globo and isoglobo series	17	9	4.73992e-06	7.48532e-06
bta00260	Glycine, serine and threonine metabolism	45	15	5.00531e-06	7.86549e-06
bta04961	Endocrine and other factor-regulated calcium reabsorption	51	16	5.96809e-06	9.33246e-06
bta00020	Citrate cycle (TCA cycle)	31	12	7.60048e-06	1.17697e-05
bta00512	Mucin type O-glycan biosynthesis	31	12	7.60048e-06	1.17697e-05
bta00760	Nicotinate and nicotinamide metabolism	36	13	7.82778e-06	1.20631e-05
bta04964	Proximal tubule bicarbonate reclamation	22	10	8.01417e-06	1.2291e-05
bta04657	IL-17 signaling pathway	95	23	8.83266e-06	1.34814e-05
bta04060	Cytokine-cytokine receptor interaction	333	55	1.17534e-05	1.78539e-05
bta00380	Tryptophan metabolism	48	15	1.22343e-05	1.84965e-05
bta04917	Prolactin signaling pathway	84	21	1.25924e-05	1.8948e-05
bta05140	Leishmaniasis	78	20	1.34113e-05	2.00854e-05
bta01210	2-Oxocarboxylic acid metabolism	19	9	1.52397e-05	2.27171e-05
bta00640	Propanoate metabolism	33	12	1.61084e-05	2.38799e-05
bta04962	Vasopressin-regulated water reabsorption	49	15	1.61694e-05	2.38799e-05
bta04924	Renin secretion	73	19	1.73602e-05	2.55203e-05
bta04927	Cortisol synthesis and secretion	67	18	1.79315e-05	2.62393e-05
bta04979	Cholesterol metabolism	50	15	2.11842e-05	3.08574e-05
bta04726	Serotonergic synapse	121	26	3.45335e-05	5.00736e-05
bta04710	Circadian rhythm	31	11	4.73046e-05	6.82813e-05
bta04662	B cell receptor signaling pathway	85	20	5.1453e-05	7.39347e-05
bta05032	Morphine addiction	92	21	5.45296e-05	7.80042e-05
bta04658	Th1 and Th2 cell differentiation	99	22	5.65513e-05	8.05351e-05
bta04966	Collecting duct acid secretion	27	10	6.86503e-05	9.73308e-05
bta00450	Selenocompound metabolism	18	8	8.13252e-05	0.000114791
bta00410	beta-Alanine metabolism	33	11	9.12984e-05	0.00012718
bta04136	Autophagy - other	33	11	9.12984e-05	0.00012718
bta04972	Pancreatic secretion	102	22	9.07845e-05	0.00012718
bta00650	Butanoate metabolism	28	10	9.81947e-05	0.000136192
bta04664	Fc epsilon RI signaling pathway	70	17	0.000120921	0.000166986
bta03020	RNA polymerase	29	10	0.000137825	0.000189509
bta04612	Antigen processing and presentation	91	20	0.000141645	0.000193926
bta04514	Cell adhesion molecules	163	30	0.000156407	0.000213221
bta04724	Glutamatergic synapse	113	23	0.000184355	0.000250252
bta00601	Glycosphingolipid biosynthesis - lacto and neolacto series	30	10	0.000190129	0.000256997
bta04623	Cytosolic DNA-sensing pathway	73	17	0.000209172	0.000281544
bta04960	Aldosterone-regulated sodium reabsorption	37	11	0.000287811	0.000385763
bta00770	Pantothenate and CoA biosynthesis	21	8	0.000295643	0.000394603
bta00983	Drug metabolism - other enzymes	76	17	0.000348864	0.000463699
bta04970	Salivary secretion	103	21	0.000356708	0.000472157
bta00250	Alanine, aspartate and glutamate metabolism	38	11	0.000372364	0.000490843
bta00531	Glycosaminoglycan degradation	22	8	0.000428064	0.000561944
bta04130	SNARE interactions in vesicular transport	33	10	0.000455838	0.000595952
bta04923	Regulation of lipolysis in adipocytes	58	14	0.000500432	0.000651582
bta04930	Type II diabetes mellitus	46	12	0.000585352	0.000759054
bta04727	GABAergic synapse	91	19	0.000598952	0.000773545
bta03430	Mismatch repair	23	8	0.000604839	0.000777999
bta00670	One carbon pool by folate	18	7	0.000616419	0.00078971
bta00860	Porphyrin and chlorophyll metabolism	41	11	0.000759832	0.000969545
bta00565	Ether lipid metabolism	54	13	0.000806538	0.00102504
bta00534	Glycosaminoglycan biosynthesis - heparan sulfate / heparin	24	8	0.000836131	0.00105844
bta04640	Hematopoietic cell lineage	110	21	0.00111368	0.0014042
bta04340	Hedgehog signaling pathway	56	13	0.00116084	0.00145791
bta05322	Systemic lupus erythematosus	203	6	0.00121345	0.001518
bta00532	Glycosaminoglycan biosynthesis - chondroitin sulfate / dermatan sulfate	20	7	0.00127845	0.00159307
bta00533	Glycosaminoglycan biosynthesis - keratan sulfate	15	6	0.00128961	0.00160072
bta04973	Carbohydrate digestion and absorption	44	11	0.00143445	0.0017736
bta01523	Antifolate resistance	51	12	0.00156632	0.00192917
bta00604	Glycosphingolipid biosynthesis - ganglio series	16	6	0.00190714	0.00233991
bta05416	Viral myocarditis	78	16	0.00202659	0.00247695
bta00340	Histidine metabolism	22	7	0.00239602	0.0029173
bta00051	Fructose and mannose metabolism	34	9	0.00249968	0.00302044
bta04215	Apoptosis - multiple species	34	9	0.00249968	0.00302044
bta00120	Primary bile acid biosynthesis	17	6	0.00272467	0.00327989
bta00511	Other glycan degradation	23	7	0.00317967	0.00381321
bta00520	Amino sugar and nucleotide sugar metabolism	51	11	0.00496901	0.00593675
bta05321	Inflammatory bowel disease	71	14	0.00516863	0.00615221
bta04260	Cardiac muscle contraction	93	17	0.00522673	0.00619824
bta00350	Tyrosine metabolism	39	9	0.00670993	0.00792766
bta00220	Arginine biosynthesis	20	6	0.00674814	0.00794338
bta05330	Allograft rejection	58	0	0.00911112	0.0106855
bta04622	RIG-I-like receptor signaling pathway	106	18	0.00931869	0.0108889
bta04610	Complement and coagulation cascades	93	16	0.0101165	0.0117779
bta00053	Ascorbate and aldarate metabolism	28	7	0.0103195	0.0119706
bta04730	Long-term depression	61	12	0.0106157	0.0122253
bta05144	Malaria	61	12	0.0106157	0.0122253
bta04392	Hippo signaling pathway - multiple species	29	7	0.0125689	0.0144226
bta04080	Neuroactive ligand-receptor interaction	368	47	0.016936	0.0193641
bta02010	ABC transporters	68	12	0.0190139	0.0216623
bta03022	Basal transcription factors	46	9	0.0197739	0.022448
bta04613	Neutrophil extracellular trap formation	253	34	0.0198972	0.0225078
bta05332	Graft-versus-host disease	66	1	0.028804	0.0324681
bta04977	Vitamin digestion and absorption	27	6	0.0299893	0.0336851
bta05034	Alcoholism	246	32	0.0332231	0.0371866
bta00590	Arachidonic acid metabolism	87	14	0.0356485	0.0397618
bta04976	Bile secretion	106	16	0.0390532	0.0434076
bta00592	alpha-Linolenic acid metabolism	29	6	0.0412977	0.0457429

## Sheet: Pathway_detail
Gene Set Name	Gene Id	Gene Symbol	Description
bta05022	504357	AXIN1	axin 1
bta05022	506238	PSMC1	proteasome 26S subunit, ATPase 1
bta05022	282023	PTGS2	prostaglandin-endoperoxide synthase 2
bta05022	281481	SDHD	succinate dehydrogenase complex subunit D
bta05022	523325	DVL1	dishevelled segment polarity protein 1
bta05022	511575	GPX8	glutathione peroxidase 8 (putative)
bta05022	282321	PPP3R1	protein phosphatase 3 regulatory subunit B, alpha
bta05022	281661	CAPN1	calpain 1
bta05022	537782	APAF1	apoptotic peptidase activating factor 1
bta05022	536654	GNAQ	G protein subunit alpha q
bta05022	509107	ATF4	activating transcription factor 4
bta05022	541236	XBP1	X-box binding protein 1
bta05022	767981	SEM1	SEM1 26S proteasome subunit
bta05022	282010	PSEN2	presenilin 2
bta05022	535683	PSMD14	proteasome 26S subunit, non-ATPase 14
bta05022	539764	RAB5A	RAB5A, member RAS oncogene family
bta05022	3283885	ND4L	NADH dehydrogenase subunit 4L
bta05022	326346	NDUFA11	NADH:ubiquinone oxidoreductase subunit A11
bta05022	281879	ITPR3	inositol 1,4,5-trisphosphate receptor type 3
bta05022	535327	MAPK13	mitogen-activated protein kinase 13
bta05022	280986	AGER	advanced glycosylation end-product specific receptor
bta05022	530186	PSMC2	proteasome 26S subunit, ATPase 2
bta05022	515503	PSMA1	proteasome 20S subunit alpha 1
bta05022	100298754	DNAH5	dynein axonemal heavy chain 5
bta05022	538536	FZD5	frizzled class receptor 5
bta05022	280796	FUS	FUS RNA binding protein
bta05022	282120	VDAC2	voltage dependent anion channel 2
bta05022	534640	PSMB5	proteasome 20S subunit beta 5
bta05022	539235	CSNK2B	casein kinase 2 beta
bta05022	338060	NDUFA10	NADH:ubiquinone oxidoreductase subunit A10
bta05022	338053	ATP5MC1	ATP synthase membrane subunit c locus 1
bta05022	514394	UCHL1	ubiquitin C-terminal hydrolase L1
bta05022	504336	DAXX	death domain associated protein
bta05022	613541	NDUFA4L2	NDUFA4 mitochondrial complex associated like 2
bta05022	514237	PSMB1	proteasome 20S subunit beta 1
bta05022	517263	AMBRA1	autophagy and beclin 1 regulator 1
bta05022	327710	NDUFA8	NADH:ubiquinone oxidoreductase subunit A8
bta05022	513461	PSMD11	proteasome 26S subunit, non-ATPase 11
bta05022	282869	UBA1	ubiquitin like modifier activating enzyme 1
bta05022	3283888	ND6	NADH dehydrogenase subunit 6
bta05022	537376	RYR2	ryanodine receptor 2
bta05022	3283881	ATP8	ATP synthase F0 subunit 8
bta05022	534150	OPTN	optineurin
bta05022	541161	DKK2	dickkopf WNT signaling pathway inhibitor 2
bta05022	539149	TUBB4B	tubulin beta 4B class IVb
bta05022	533874	PSMB3	proteasome 20S subunit beta 3
bta05022	512891	PSMD8	proteasome 26S subunit, non-ATPase 8
bta05022	516039	MAP2K3	mitogen-activated protein kinase kinase 3
bta05022	540632	TARDBP	TAR DNA binding protein
bta05022	510219	TOMM40	translocase of outer mitochondrial membrane 40
bta05022	327673	NDUFA1	NADH:ubiquinone oxidoreductase subunit A1
bta05022	514090	BAK1	BCL2 antagonist/killer 1
bta05022	338081	ATP5F1D	ATP synthase F1 subunit delta
bta05022	338033	TNFRSF1B	TNF receptor superfamily member 1B
bta05022	504937	PSMD3	proteasome 26S subunit, non-ATPase 3
bta05022	282419	CSNK2A1	casein kinase 2 alpha 1
bta05022	408015	CACNA1C	calcium voltage-gated channel subunit alpha1 C
bta05022	100125305	ACTR1B	actin related protein 1B
bta05022	540176	ATP5MC3	ATP synthase membrane subunit c locus 3
bta05022	533233	APC	APC regulator of WNT signaling pathway
bta05022	514327	DCTN3	dynactin subunit 3
bta05022	100137840	DLG4	discs large MAGUK scaffold protein 4
bta05022	507345	VCP	valosin containing protein
bta05022	445417	FZD1	frizzled class receptor 1
bta05022	513049	ATG101	autophagy related 101
bta05022	514371	ACTR1A	actin related protein 1A
bta05022	531436	IFT57	intraflagellar transport 57
bta05022	408016	CASP3	caspase 3
bta05022	282479	SLC25A5	solute carrier family 25 member 5
bta05022	282152	BCL2L1	BCL2 like 1
bta05022	338063	NDUFA7	NADH:ubiquinone oxidoreductase subunit A7
bta05022	327691	NDUFS6	NADH:ubiquinone oxidoreductase subunit S6
bta05022	327698	NDUFA2	NADH:ubiquinone oxidoreductase subunit A2
bta05022	511308	WNT9A	Wnt family member 9A
bta05022	539003	CTNNB1	catenin beta 1
bta05022	530005	WNT5A	Wnt family member 5A
bta05022	287027	NDUFS8	NADH:ubiquinone oxidoreductase core subunit S8
bta05022	282527	TNFRSF1A	TNF receptor superfamily member 1A
bta05022	445416	FZD4	frizzled class receptor 4
bta05022	539507	ATXN2L	ataxin 2 like
bta05022	511083	ACTR10	actin related protein 10
bta05022	511268	PARK7	Parkinsonism associated deglycase
bta05022	616913	FZD8	frizzled class receptor 8
bta05022	506203	PSMB4	proteasome 20S subunit beta 4
bta05022	338046	NDUFC2	NADH:ubiquinone oxidoreductase subunit C2
bta05022	508008	WNT5B	Wnt family member 5B
bta05022	510029	PSMC4	proteasome 26S subunit, ATPase 4
bta05022	282289	NDUFC1	NADH:ubiquinone oxidoreductase subunit C1
bta05022	112442685	ERN1	endoplasmic reticulum to nucleus signaling 1
bta05022	511207	PSMB7	proteasome 20S subunit beta 7
bta05022	286839	RPS27A	ribosomal protein S27a
bta05022	338073	NDUFB3	NADH:ubiquinone oxidoreductase subunit B3
bta05022	615087	TUBB	tubulin beta class I
bta05022	327697	NDUFS2	NADH:ubiquinone oxidoreductase core subunit S2
bta05022	516919	PSMB2	proteasome 20S subunit beta 2
bta05022	519729	ADRM1	ADRM1 26S proteasome ubiquitin receptor
bta05022	534450	LRP5	LDL receptor related protein 5
bta05022	508448	PSMC3	proteasome 26S subunit, ATPase 3
bta05022	539141	PSMA2	proteasome 20S subunit alpha 2
bta05022	282701	ATP5PB	ATP synthase peripheral stalk-membrane subunit b
bta05022	281809	HSD17B10	hydroxysteroid 17-beta dehydrogenase 10
bta05022	281094	CSF1	colony stimulating factor 1
bta05022	281020	BCL2	BCL2 apoptosis regulator
bta05022	618422	HAP1	huntingtin associated protein 1
bta05022	790880	ATXN3	ataxin 3
bta05022	511619	AXIN2	axin 2
bta05022	538507	FZD2	frizzled class receptor 2
bta05022	512456	PSMD7	proteasome 26S subunit, non-ATPase 7
bta05022	777788	DDIT3	DNA damage inducible transcript 3
bta05022	540236	TUBB4A	tubulin beta 4A class IVa
bta05022	514472	TRAP1	TNF receptor associated protein 1
bta05022	510683	PINK1	PTEN induced kinase 1
bta05022	415113	HSPA5	heat shock protein family A (Hsp70) member 5
bta05022	338045	SQSTM1	sequestosome 1
bta05022	514261	KIF5B	kinesin family member 5B
bta05022	280826	IL6	interleukin 6
bta05022	618906	MAPK11	mitogen-activated protein kinase 11
bta05022	510373	BID	BH3 interacting domain death agonist
bta05022	518136	KLC2	kinesin light chain 2
bta05022	327675	ATP5F1B	ATP synthase F1 subunit beta
bta05022	538625	PSMD6	proteasome 26S subunit, non-ATPase 6
bta05022	404121	DERL1	derlin 1
bta05022	282478	SLC25A4	solute carrier family 25 member 4
bta05022	512943	MAPK12	mitogen-activated protein kinase 12
bta05022	287026	PLCB1	phospholipase C beta 1
bta05022	510434	MAP2K2	mitogen-activated protein kinase kinase 2
bta05022	511803	PSMD1	proteasome 26S subunit, non-ATPase 1
bta05022	100139219	MTOR	mechanistic target of rapamycin kinase
bta05022	506441	DCTN5	dynactin subunit 5
bta05022	539337	WNT10B	Wnt family member 10B
bta05022	3283889	CYTB	cytochrome b
bta05022	282480	SLC25A6	solute carrier family 25 member 6
bta05022	506103	UBE2J2	ubiquitin conjugating enzyme E2 J2
bta05022	281480	SDHA	succinate dehydrogenase complex flavoprotein subunit A
bta05022	404188	NDUFA9	NADH:ubiquinone oxidoreductase subunit A9
bta05022	781037	MAP3K10	mitogen-activated protein kinase kinase kinase 10
bta05022	282517	NDUFB8	NADH:ubiquinone oxidoreductase subunit B8
bta05022	538903	SIGMAR1	sigma non-opioid intracellular receptor 1
bta05022	287014	NDUFV1	NADH:ubiquinone oxidoreductase core subunit V1
bta05022	530719	CAMK2A	calcium/calmodulin dependent protein kinase II alpha
bta05022	537916	ZFYVE1	zinc finger FYVE-type containing 1
bta05022	282016	PSMD4	proteasome 26S subunit ubiquitin receptor, non-ATPase 4
bta05022	521196	RAF1	Raf-1 proto-oncogene, serine/threonine kinase
bta05022	510069	PSMB6	proteasome 20S subunit beta 6
bta05022	512685	WIPI2	WD repeat domain, phosphoinositide interacting 2
bta05022	615059	HTT	huntingtin
bta05022	511045	DCTN1	dynactin subunit 1
bta05022	528410	WIPI1	WD repeat domain, phosphoinositide interacting 1
bta05022	615013	BAD	BCL2 associated agonist of cell death
bta05022	282015	PSMC5	proteasome 26S subunit, ATPase 5
bta05022	338079	NDUFS7	NADH:ubiquinone oxidoreductase core subunit S7
bta05022	535820	EIF2AK3	eukaryotic translation initiation factor 2 alpha kinase 3
bta05022	533199	MAP2K1	mitogen-activated protein kinase kinase 1
bta05022	535750	ALS2	alsin Rho guanine nucleotide exchange factor ALS2
bta05022	100297344	CALM2	calmodulin 2
bta05022	534574	MFN2	mitofusin 2
bta05022	513525	PSMD13	proteasome 26S subunit, non-ATPase 13
bta05022	536051	BRAF	B-Raf proto-oncogene, serine/threonine kinase
bta05022	327660	NDUFB9	NADH:ubiquinone oxidoreductase subunit B9
bta05022	444874	UBC	ubiquitin C
bta05022	539784	PSMD2	proteasome 26S subunit ubiquitin receptor, non-ATPase 2
bta05022	3283884	ND3	NADH dehydrogenase subunit 3
bta05022	327696	SDHC	succinate dehydrogenase complex subunit C
bta05022	777775	TUBA4A	tubulin alpha 4a
bta05022	790867	PPP3CB	protein phosphatase 3 catalytic subunit beta
bta05022	781661	SMCR8	SMCR8-C9orf72 complex subunit
bta05022	493720	FADD	Fas associated via death domain
bta05022	617095	CALM1	calmodulin 1
bta05022	327690	NDUFB1	NADH:ubiquinone oxidoreductase subunit B1
bta05022	282162	CAMK2G	calcium/calmodulin dependent protein kinase II gamma
bta05022	508233	RELA	RELA proto-oncogene, NF-kB subunit
bta05010	3283881	ATP8	ATP synthase F0 subunit 8
bta05010	493993	PSENEN	presenilin enhancer, gamma-secretase subunit
bta05010	3283888	ND6	NADH dehydrogenase subunit 6
bta05010	513461	PSMD11	proteasome 26S subunit, non-ATPase 11
bta05010	327710	NDUFA8	NADH:ubiquinone oxidoreductase subunit A8
bta05010	514237	PSMB1	proteasome 20S subunit beta 1
bta05010	613541	NDUFA4L2	NDUFA4 mitochondrial complex associated like 2
bta05010	517263	AMBRA1	autophagy and beclin 1 regulator 1
bta05010	359718	RTN4	reticulon 4
bta05010	539235	CSNK2B	casein kinase 2 beta
bta05010	338053	ATP5MC1	ATP synthase membrane subunit c locus 1
bta05010	338060	NDUFA10	NADH:ubiquinone oxidoreductase subunit A10
bta05010	282120	VDAC2	voltage dependent anion channel 2
bta05010	534640	PSMB5	proteasome 20S subunit beta 5
bta05010	538536	FZD5	frizzled class receptor 5
bta05010	515503	PSMA1	proteasome 20S subunit alpha 1
bta05010	530186	PSMC2	proteasome 26S subunit, ATPase 2
bta05010	104968467	GPR83	G protein-coupled receptor 83
bta05010	280986	AGER	advanced glycosylation end-product specific receptor
bta05010	3283885	ND4L	NADH dehydrogenase subunit 4L
bta05010	281879	ITPR3	inositol 1,4,5-trisphosphate receptor type 3
bta05010	326346	NDUFA11	NADH:ubiquinone oxidoreductase subunit A11
bta05010	282308	PIK3R2	phosphoinositide-3-kinase regulatory subunit 2
bta05010	282010	PSEN2	presenilin 2
bta05010	535683	PSMD14	proteasome 26S subunit, non-ATPase 14
bta05010	509107	ATF4	activating transcription factor 4
bta05010	541236	XBP1	X-box binding protein 1
bta05010	767981	SEM1	SEM1 26S proteasome subunit
bta05010	536654	GNAQ	G protein subunit alpha q
bta05010	537782	APAF1	apoptotic peptidase activating factor 1
bta05010	282321	PPP3R1	protein phosphatase 3 regulatory subunit B, alpha
bta05010	281661	CAPN1	calpain 1
bta05010	523325	DVL1	dishevelled segment polarity protein 1
bta05010	281481	SDHD	succinate dehydrogenase complex subunit D
bta05010	504357	AXIN1	axin 1
bta05010	506238	PSMC1	proteasome 26S subunit, ATPase 1
bta05010	282023	PTGS2	prostaglandin-endoperoxide synthase 2
bta05010	511207	PSMB7	proteasome 20S subunit beta 7
bta05010	282289	NDUFC1	NADH:ubiquinone oxidoreductase subunit C1
bta05010	112442685	ERN1	endoplasmic reticulum to nucleus signaling 1
bta05010	510029	PSMC4	proteasome 26S subunit, ATPase 4
bta05010	282132	ADAM10	ADAM metallopeptidase domain 10
bta05010	508008	WNT5B	Wnt family member 5B
bta05010	616913	FZD8	frizzled class receptor 8
bta05010	338046	NDUFC2	NADH:ubiquinone oxidoreductase subunit C2
bta05010	506203	PSMB4	proteasome 20S subunit beta 4
bta05010	445416	FZD4	frizzled class receptor 4
bta05010	530005	WNT5A	Wnt family member 5A
bta05010	287027	NDUFS8	NADH:ubiquinone oxidoreductase core subunit S8
bta05010	282527	TNFRSF1A	TNF receptor superfamily member 1A
bta05010	539003	CTNNB1	catenin beta 1
bta05010	517541	ADAM17	ADAM metallopeptidase domain 17
bta05010	514929	NCSTN	nicastrin
bta05010	327698	NDUFA2	NADH:ubiquinone oxidoreductase subunit A2
bta05010	511308	WNT9A	Wnt family member 9A
bta05010	338063	NDUFA7	NADH:ubiquinone oxidoreductase subunit A7
bta05010	327691	NDUFS6	NADH:ubiquinone oxidoreductase subunit S6
bta05010	408016	CASP3	caspase 3
bta05010	282479	SLC25A5	solute carrier family 25 member 5
bta05010	530913	APH1B	aph-1 homolog B, gamma-secretase subunit
bta05010	513049	ATG101	autophagy related 101
bta05010	445417	FZD1	frizzled class receptor 1
bta05010	533233	APC	APC regulator of WNT signaling pathway
bta05010	538598	IRS1	insulin receptor substrate 1
bta05010	540176	ATP5MC3	ATP synthase membrane subunit c locus 3
bta05010	408015	CACNA1C	calcium voltage-gated channel subunit alpha1 C
bta05010	504937	PSMD3	proteasome 26S subunit, non-ATPase 3
bta05010	282419	CSNK2A1	casein kinase 2 alpha 1
bta05010	338081	ATP5F1D	ATP synthase F1 subunit delta
bta05010	281181	GAPDH	glyceraldehyde-3-phosphate dehydrogenase
bta05010	327673	NDUFA1	NADH:ubiquinone oxidoreductase subunit A1
bta05010	533874	PSMB3	proteasome 20S subunit beta 3
bta05010	512891	PSMD8	proteasome 26S subunit, non-ATPase 8
bta05010	541161	DKK2	dickkopf WNT signaling pathway inhibitor 2
bta05010	539149	TUBB4B	tubulin beta 4B class IVb
bta05010	287026	PLCB1	phospholipase C beta 1
bta05010	510434	MAP2K2	mitogen-activated protein kinase kinase 2
bta05010	282478	SLC25A4	solute carrier family 25 member 4
bta05010	280991	AKT1	AKT serine/threonine kinase 1
bta05010	538625	PSMD6	proteasome 26S subunit, non-ATPase 6
bta05010	518136	KLC2	kinesin light chain 2
bta05010	327675	ATP5F1B	ATP synthase F1 subunit beta
bta05010	510373	BID	BH3 interacting domain death agonist
bta05010	280826	IL6	interleukin 6
bta05010	282307	PIK3R1	phosphoinositide-3-kinase regulatory subunit 1
bta05010	514261	KIF5B	kinesin family member 5B
bta05010	540236	TUBB4A	tubulin beta 4A class IVa
bta05010	512456	PSMD7	proteasome 26S subunit, non-ATPase 7
bta05010	777788	DDIT3	DNA damage inducible transcript 3
bta05010	538507	FZD2	frizzled class receptor 2
bta05010	511619	AXIN2	axin 2
bta05010	504531	PIK3CD	phosphatidylinositol-4,5-bisphosphate 3-kinase catalytic subunit delta
bta05010	281094	CSF1	colony stimulating factor 1
bta05010	281809	HSD17B10	hydroxysteroid 17-beta dehydrogenase 10
bta05010	282701	ATP5PB	ATP synthase peripheral stalk-membrane subunit b
bta05010	347700	EIF2AK2	eukaryotic translation initiation factor 2 alpha kinase 2
bta05010	539141	PSMA2	proteasome 20S subunit alpha 2
bta05010	534450	LRP5	LDL receptor related protein 5
bta05010	508448	PSMC3	proteasome 26S subunit, ATPase 3
bta05010	519729	ADRM1	ADRM1 26S proteasome ubiquitin receptor
bta05010	516919	PSMB2	proteasome 20S subunit beta 2
bta05010	327697	NDUFS2	NADH:ubiquinone oxidoreductase core subunit S2
bta05010	338073	NDUFB3	NADH:ubiquinone oxidoreductase subunit B3
bta05010	615087	TUBB	tubulin beta class I
bta05010	508233	RELA	RELA proto-oncogene, NF-kB subunit
bta05010	282306	PIK3CA	phosphatidylinositol-4,5-bisphosphate 3-kinase catalytic subunit alpha
bta05010	327690	NDUFB1	NADH:ubiquinone oxidoreductase subunit B1
bta05010	617095	CALM1	calmodulin 1
bta05010	493720	FADD	Fas associated via death domain
bta05010	790867	PPP3CB	protein phosphatase 3 catalytic subunit beta
bta05010	777775	TUBA4A	tubulin alpha 4a
bta05010	327696	SDHC	succinate dehydrogenase complex subunit C
bta05010	3283884	ND3	NADH dehydrogenase subunit 3
bta05010	539784	PSMD2	proteasome 26S subunit ubiquitin receptor, non-ATPase 2
bta05010	327660	NDUFB9	NADH:ubiquinone oxidoreductase subunit B9
bta05010	100297344	CALM2	calmodulin 2
bta05010	536051	BRAF	B-Raf proto-oncogene, serine/threonine kinase
bta05010	513525	PSMD13	proteasome 26S subunit, non-ATPase 13
bta05010	535820	EIF2AK3	eukaryotic translation initiation factor 2 alpha kinase 3
bta05010	533199	MAP2K1	mitogen-activated protein kinase kinase 1
bta05010	282015	PSMC5	proteasome 26S subunit, ATPase 5
bta05010	338079	NDUFS7	NADH:ubiquinone oxidoreductase core subunit S7
bta05010	528410	WIPI1	WD repeat domain, phosphoinositide interacting 1
bta05010	615013	BAD	BCL2 associated agonist of cell death
bta05010	512685	WIPI2	WD repeat domain, phosphoinositide interacting 2
bta05010	521196	RAF1	Raf-1 proto-oncogene, serine/threonine kinase
bta05010	510069	PSMB6	proteasome 20S subunit beta 6
bta05010	282016	PSMD4	proteasome 26S subunit ubiquitin receptor, non-ATPase 4
bta05010	533894	LRP1	LDL receptor related protein 1
bta05010	523752	IDE	insulin degrading enzyme
bta05010	287014	NDUFV1	NADH:ubiquinone oxidoreductase core subunit V1
bta05010	404188	NDUFA9	NADH:ubiquinone oxidoreductase subunit A9
bta05010	282517	NDUFB8	NADH:ubiquinone oxidoreductase subunit B8
bta05010	281480	SDHA	succinate dehydrogenase complex flavoprotein subunit A
bta05010	3283889	CYTB	cytochrome b
bta05010	534774	BACE2	beta-secretase 2
bta05010	282480	SLC25A6	solute carrier family 25 member 6
bta05010	511803	PSMD1	proteasome 26S subunit, non-ATPase 1
bta05010	539337	WNT10B	Wnt family member 10B
bta05010	100139219	MTOR	mechanistic target of rapamycin kinase
bta05014	507345	VCP	valosin containing protein
bta05014	514327	DCTN3	dynactin subunit 3
bta05014	513049	ATG101	autophagy related 101
bta05014	100138517	NUP62	nucleoporin 62
bta05014	504937	PSMD3	proteasome 26S subunit, non-ATPase 3
bta05014	338033	TNFRSF1B	TNF receptor superfamily member 1B
bta05014	540176	ATP5MC3	ATP synthase membrane subunit c locus 3
bta05014	100125305	ACTR1B	actin related protein 1B
bta05014	504786	NUP88	nucleoporin 88
bta05014	327673	NDUFA1	NADH:ubiquinone oxidoreductase subunit A1
bta05014	540632	TARDBP	TAR DNA binding protein
bta05014	510219	TOMM40	translocase of outer mitochondrial membrane 40
bta05014	516039	MAP2K3	mitogen-activated protein kinase kinase 3
bta05014	338081	ATP5F1D	ATP synthase F1 subunit delta
bta05014	512891	PSMD8	proteasome 26S subunit, non-ATPase 8
bta05014	533874	PSMB3	proteasome 20S subunit beta 3
bta05014	539149	TUBB4B	tubulin beta 4B class IVb
bta05014	534150	OPTN	optineurin
bta05014	510029	PSMC4	proteasome 26S subunit, ATPase 4
bta05014	511207	PSMB7	proteasome 20S subunit beta 7
bta05014	112442685	ERN1	endoplasmic reticulum to nucleus signaling 1
bta05014	282289	NDUFC1	NADH:ubiquinone oxidoreductase subunit C1
bta05014	520174	NUP43	nucleoporin 43
bta05014	511083	ACTR10	actin related protein 10
bta05014	539507	ATXN2L	ataxin 2 like
bta05014	338046	NDUFC2	NADH:ubiquinone oxidoreductase subunit C2
bta05014	506203	PSMB4	proteasome 20S subunit beta 4
bta05014	782669	HNRNPA3	heterogeneous nuclear ribonucleoprotein A3
bta05014	327698	NDUFA2	NADH:ubiquinone oxidoreductase subunit A2
bta05014	282527	TNFRSF1A	TNF receptor superfamily member 1A
bta05014	287027	NDUFS8	NADH:ubiquinone oxidoreductase core subunit S8
bta05014	514371	ACTR1A	actin related protein 1A
bta05014	282152	BCL2L1	BCL2 like 1
bta05014	338063	NDUFA7	NADH:ubiquinone oxidoreductase subunit A7
bta05014	327691	NDUFS6	NADH:ubiquinone oxidoreductase subunit S6
bta05014	408016	CASP3	caspase 3
bta05014	326346	NDUFA11	NADH:ubiquinone oxidoreductase subunit A11
bta05014	281879	ITPR3	inositol 1,4,5-trisphosphate receptor type 3
bta05014	539764	RAB5A	RAB5A, member RAS oncogene family
bta05014	3283885	ND4L	NADH dehydrogenase subunit 4L
bta05014	535683	PSMD14	proteasome 26S subunit, non-ATPase 14
bta05014	100298754	DNAH5	dynein axonemal heavy chain 5
bta05014	530186	PSMC2	proteasome 26S subunit, ATPase 2
bta05014	515503	PSMA1	proteasome 20S subunit alpha 1
bta05014	535327	MAPK13	mitogen-activated protein kinase 13
bta05014	537782	APAF1	apoptotic peptidase activating factor 1
bta05014	282321	PPP3R1	protein phosphatase 3 regulatory subunit B, alpha
bta05014	767981	SEM1	SEM1 26S proteasome subunit
bta05014	541236	XBP1	X-box binding protein 1
bta05014	509107	ATF4	activating transcription factor 4
bta05014	511575	GPX8	glutathione peroxidase 8 (putative)
bta05014	507066	SRSF7	serine and arginine rich splicing factor 7
bta05014	281361	NRG1	neuregulin 1
bta05014	506738	NUP155	nucleoporin 155
bta05014	281481	SDHD	succinate dehydrogenase complex subunit D
bta05014	506238	PSMC1	proteasome 26S subunit, ATPase 1
bta05014	614694	NUP58	nucleoporin 58
bta05014	3283881	ATP8	ATP synthase F0 subunit 8
bta05014	280979	ACTB	actin beta
bta05014	513461	PSMD11	proteasome 26S subunit, non-ATPase 11
bta05014	3283888	ND6	NADH dehydrogenase subunit 6
bta05014	504336	DAXX	death domain associated protein
bta05014	327710	NDUFA8	NADH:ubiquinone oxidoreductase subunit A8
bta05014	514237	PSMB1	proteasome 20S subunit beta 1
bta05014	517263	AMBRA1	autophagy and beclin 1 regulator 1
bta05014	613541	NDUFA4L2	NDUFA4 mitochondrial complex associated like 2
bta05014	534640	PSMB5	proteasome 20S subunit beta 5
bta05014	280796	FUS	FUS RNA binding protein
bta05014	100124428	NCBP1	nuclear cap binding protein subunit 1
bta05014	338060	NDUFA10	NADH:ubiquinone oxidoreductase subunit A10
bta05014	338053	ATP5MC1	ATP synthase membrane subunit c locus 1
bta05014	615013	BAD	BCL2 associated agonist of cell death
bta05014	511045	DCTN1	dynactin subunit 1
bta05014	528410	WIPI1	WD repeat domain, phosphoinositide interacting 1
bta05014	512685	WIPI2	WD repeat domain, phosphoinositide interacting 2
bta05014	535750	ALS2	alsin Rho guanine nucleotide exchange factor ALS2
bta05014	535820	EIF2AK3	eukaryotic translation initiation factor 2 alpha kinase 3
bta05014	533021	UBQLN4	ubiquilin 4
bta05014	282392	UBQLN1	ubiquilin 1
bta05014	338079	NDUFS7	NADH:ubiquinone oxidoreductase core subunit S7
bta05014	282015	PSMC5	proteasome 26S subunit, ATPase 5
bta05014	404122	ACTG1	actin gamma 1
bta05014	282016	PSMD4	proteasome 26S subunit ubiquitin receptor, non-ATPase 4
bta05014	513895	PFN1	profilin 1
bta05014	510069	PSMB6	proteasome 20S subunit beta 6
bta05014	287014	NDUFV1	NADH:ubiquinone oxidoreductase core subunit V1
bta05014	538903	SIGMAR1	sigma non-opioid intracellular receptor 1
bta05014	3283889	CYTB	cytochrome b
bta05014	506441	DCTN5	dynactin subunit 5
bta05014	100139219	MTOR	mechanistic target of rapamycin kinase
bta05014	511803	PSMD1	proteasome 26S subunit, non-ATPase 1
bta05014	282517	NDUFB8	NADH:ubiquinone oxidoreductase subunit B8
bta05014	404188	NDUFA9	NADH:ubiquinone oxidoreductase subunit A9
bta05014	513602	HDAC6	histone deacetylase 6
bta05014	281480	SDHA	succinate dehydrogenase complex flavoprotein subunit A
bta05014	327690	NDUFB1	NADH:ubiquinone oxidoreductase subunit B1
bta05014	510004	NUP93	nucleoporin 93
bta05014	327696	SDHC	succinate dehydrogenase complex subunit C
bta05014	3283884	ND3	NADH dehydrogenase subunit 3
bta05014	781661	SMCR8	SMCR8-C9orf72 complex subunit
bta05014	790867	PPP3CB	protein phosphatase 3 catalytic subunit beta
bta05014	777775	TUBA4A	tubulin alpha 4a
bta05014	327660	NDUFB9	NADH:ubiquinone oxidoreductase subunit B9
bta05014	513525	PSMD13	proteasome 26S subunit, non-ATPase 13
bta05014	539784	PSMD2	proteasome 26S subunit ubiquitin receptor, non-ATPase 2
bta05014	777788	DDIT3	DNA damage inducible transcript 3
bta05014	512456	PSMD7	proteasome 26S subunit, non-ATPase 7
bta05014	533360	ANXA7	annexin A7
bta05014	540236	TUBB4A	tubulin beta 4A class IVa
bta05014	618422	HAP1	huntingtin associated protein 1
bta05014	281542	TP53	tumor protein p53
bta05014	281020	BCL2	BCL2 apoptosis regulator
bta05014	504307	NUP188	nucleoporin 188
bta05014	539141	PSMA2	proteasome 20S subunit alpha 2
bta05014	508448	PSMC3	proteasome 26S subunit, ATPase 3
bta05014	616114	NDC1	NDC1 transmembrane nucleoporin
bta05014	282701	ATP5PB	ATP synthase peripheral stalk-membrane subunit b
bta05014	513270	NUP153	nucleoporin 153
bta05014	615087	TUBB	tubulin beta class I
bta05014	338073	NDUFB3	NADH:ubiquinone oxidoreductase subunit B3
bta05014	516919	PSMB2	proteasome 20S subunit beta 2
bta05014	519729	ADRM1	ADRM1 26S proteasome ubiquitin receptor
bta05014	327697	NDUFS2	NADH:ubiquinone oxidoreductase core subunit S2
bta05014	512943	MAPK12	mitogen-activated protein kinase 12
bta05014	404121	DERL1	derlin 1
bta05014	507869	TPR	translocated promoter region, nuclear basket protein
bta05014	615846	CHCHD10	coiled-coil-helix-coiled-coil-helix domain containing 10
bta05014	538625	PSMD6	proteasome 26S subunit, non-ATPase 6
bta05014	510373	BID	BH3 interacting domain death agonist
bta05014	618906	MAPK11	mitogen-activated protein kinase 11
bta05014	327675	ATP5F1B	ATP synthase F1 subunit beta
bta05014	518136	KLC2	kinesin light chain 2
bta05014	415113	HSPA5	heat shock protein family A (Hsp70) member 5
bta05014	540004	NUP98	nucleoporin 98 and 96 precursor
bta05014	510683	PINK1	PTEN induced kinase 1
bta05014	514261	KIF5B	kinesin family member 5B
bta05014	338045	SQSTM1	sequestosome 1
bta04151	281873	ITGA5	integrin subunit alpha 5
bta04151	282646	HSP90B1	heat shock protein 90 beta family member 1
bta04151	281536	TLR4	toll like receptor 4
bta04151	533147	PPP2R3C	protein phosphatase 2 regulatory subunit B''gamma
bta04151	533929	FGF18	fibroblast growth factor 18
bta04151	538598	IRS1	insulin receptor substrate 1
bta04151	520030	LAMB1	laminin subunit beta 1
bta04151	509827	ATF2	activating transcription factor 2
bta04151	520883	CDC37	cell division cycle 37, HSP90 cochaperone
bta04151	281713	CREB1	cAMP responsive element binding protein 1
bta04151	404193	FGFR2	fibroblast growth factor receptor 2
bta04151	282654	TNXB	tenascin XB
bta04151	615414	CCND2	cyclin D2
bta04151	533440	TSC1	TSC complex subunit 1
bta04151	280894	PGF	placental growth factor
bta04151	281203	GNG2	G protein subunit gamma 2
bta04151	282187	COL1A1	collagen type I alpha 1 chain
bta04151	282122	VEGFC	vascular endothelial growth factor C
bta04151	787914	RPS6	ribosomal protein S6
bta04151	282152	BCL2L1	BCL2 like 1
bta04151	506953	ITGA7	integrin subunit alpha 7
bta04151	535236	MLST8	MTOR associated protein, LST8 homolog
bta04151	519217	CDK2	cyclin dependent kinase 2
bta04151	280805	GHR	growth hormone receptor
bta04151	100336873	LAMA3	laminin subunit alpha 3
bta04151	407107	COL4A4	collagen type IV alpha 4 chain
bta04151	509107	ATF4	activating transcription factor 4
bta04151	533130	PHLPP2	PH domain and leucine rich repeat protein phosphatase 2
bta04151	785805	COL6A5	collagen type VI alpha 5 chain
bta04151	616885	FGF7	fibroblast growth factor 7
bta04151	281769	FGFR3	fibroblast growth factor receptor 3
bta04151	525962	GNB4	G protein subunit beta 4
bta04151	100298336	MAGI2	membrane associated guanylate kinase, WW and PDZ domain containing 2
bta04151	540106	PDGFB	platelet derived growth factor subunit B
bta04151	282308	PIK3R2	phosphoinositide-3-kinase regulatory subunit 2
bta04151	511602	COL4A5	collagen type IV alpha 5 chain
bta04151	613787	PDGFC	platelet derived growth factor C
bta04151	788087	MCL1	MCL1 apoptosis regulator, BCL2 family member
bta04151	768311	YWHAQ	tyrosine 3-monooxygenase/tryptophan 5-monooxygenase activation protein theta
bta04151	281144	EPOR	erythropoietin receptor
bta04151	506387	LAMA1	laminin subunit alpha 1
bta04151	353120	BRCA1	BRCA1 DNA repair associated
bta04151	281876	ITGB1	integrin subunit beta 1
bta04151	504323	THBS3	thrombospondin 3
bta04151	286862	YWHAG	tyrosine 3-monooxygenase/tryptophan 5-monooxygenase activation protein gamma
bta04151	505709	ERBB2	erb-b2 receptor tyrosine kinase 2
bta04151	281572	VEGFA	vascular endothelial growth factor A
bta04151	282125	YWHAE	tyrosine 3-monooxygenase/tryptophan 5-monooxygenase activation protein epsilon
bta04151	506526	ITGA10	integrin subunit alpha 10
bta04151	100138311	PIK3AP1	phosphoinositide-3-kinase adaptor protein 1
bta04151	100295476	EREG	epiregulin
bta04151	506083	RPS6KB2	ribosomal protein S6 kinase B2
bta04151	282856	PCK2	phosphoenolpyruvate carboxykinase 2, mitochondrial
bta04151	519920	EIF4E2	eukaryotic translation initiation factor 4E family member 2
bta04151	100298789	PPP2R3B	protein phosphatase 2 regulatory subunit B''beta
bta04151	505942	COL9A2	collagen type IX alpha 2 chain
bta04151	280794	FN1	fibronectin 1
bta04151	533294	RBL2	RB transcriptional corepressor like 2
bta04151	504985	TSC2	TSC complex subunit 2
bta04151	511812	GNG11	G protein subunit gamma 11
bta04151	536286	ITGB8	integrin subunit beta 8
bta04151	521196	RAF1	Raf-1 proto-oncogene, serine/threonine kinase
bta04151	786335	GYS1	glycogen synthase 1
bta04151	282121	VEGFB	vascular endothelial growth factor B
bta04151	615013	BAD	BCL2 associated agonist of cell death
bta04151	100138150	PPP2R1B	protein phosphatase 2 scaffold subunit Abeta
bta04151	787607	PPP2R3A	protein phosphatase 2 regulatory subunit B''alpha
bta04151	523755	ITGA11	integrin subunit alpha 11
bta04151	533199	MAP2K1	mitogen-activated protein kinase kinase 1
bta04151	282126	YWHAH	tyrosine 3-monooxygenase/tryptophan 5-monooxygenase activation protein eta
bta04151	532393	NTF3	neurotrophin 3
bta04151	100139219	MTOR	mechanistic target of rapamycin kinase
bta04151	524530	CCND1	cyclin D1
bta04151	534129	CREB5	cAMP responsive element binding protein 5
bta04151	282140	ANGPT1	angiopoietin 1
bta04151	532572	LAMC1	laminin subunit gamma 1
bta04151	783484	MAGI1	membrane associated guanylate kinase, WW and PDZ domain containing 1
bta04151	505908	PDGFA	platelet derived growth factor subunit A
bta04151	282642	ITGB3	integrin subunit beta 3
bta04151	281832	HSP90AA1	heat shock protein 90 alpha family class A member 1
bta04151	614453	EFNA2	ephrin A2
bta04151	529235	DDIT4	DNA damage inducible transcript 4
bta04151	281499	SPP1	secreted phosphoprotein 1
bta04151	509613	EIF4EBP1	eukaryotic translation initiation factor 4E binding protein 1
bta04151	513497	CDKN1A	cyclin dependent kinase inhibitor 1A
bta04151	282879	HGF	hepatocyte growth factor
bta04151	505757	PPP2R5C	protein phosphatase 2 regulatory subunit B'gamma
bta04151	530102	COL6A6	collagen type VI alpha 6 chain
bta04151	508233	RELA	RELA proto-oncogene, NF-kB subunit
bta04151	282306	PIK3CA	phosphatidylinositol-4,5-bisphosphate 3-kinase catalytic subunit alpha
bta04151	514720	OSMR	oncostatin M receptor
bta04151	529566	CREB3L4	cAMP responsive element binding protein 3 like 4
bta04151	513340	GNB3	G protein subunit beta 3
bta04151	511043	LAMC2	laminin subunit gamma 2
bta04151	538436	CCNE2	cyclin E2
bta04151	540664	TNC	tenascin C
bta04151	282188	COL1A2	collagen type I alpha 2 chain
bta04151	507319	EFNA1	ephrin A1
bta04151	280827	IL7	interleukin 7
bta04151	281872	ITGA2	integrin subunit alpha 2
bta04151	281542	TP53	tumor protein p53
bta04151	281094	CSF1	colony stimulating factor 1
bta04151	281020	BCL2	BCL2 apoptosis regulator
bta04151	504531	PIK3CD	phosphatidylinositol-4,5-bisphosphate 3-kinase catalytic subunit delta
bta04151	535043	ITGA6	integrin subunit alpha 6
bta04151	613930	GNG10	G protein subunit gamma 10
bta04151	326285	FGF10	fibroblast growth factor 10
bta04151	528390	NR4A1	nuclear receptor subfamily 4 group A member 1
bta04151	513105	CREB3L1	cAMP responsive element binding protein 3 like 1
bta04151	529670	LAMA4	laminin subunit alpha 4
bta04151	505824	NTRK2	neurotrophic receptor tyrosine kinase 2
bta04151	507056	RPTOR	regulatory associated protein of MTOR complex 1
bta04151	509080	PKN1	protein kinase N1
bta04151	508490	ITGA3	integrin subunit alpha 3
bta04151	525246	JAK2	Janus kinase 2
bta04151	505850	EIF4B	eukaryotic translation initiation factor 4B
bta04151	506270	PTK2	protein tyrosine kinase 2
bta04151	280991	AKT1	AKT serine/threonine kinase 1
bta04151	512613	CDKN1B	cyclin dependent kinase inhibitor 1B
bta04151	281530	THBS1	thrombospondin 1
bta04151	527165	PDGFRB	platelet derived growth factor receptor beta
bta04151	537201	JAK1	Janus kinase 1
bta04151	510434	MAP2K2	mitogen-activated protein kinase kinase 2
bta04151	404154	IL4R	interleukin 4 receptor
bta04151	512798	EPHA2	EPH receptor A2
bta04151	281885	KITLG	KIT ligand
bta04151	280826	IL6	interleukin 6
bta04151	281160	FGF1	fibroblast growth factor 1
bta04151	520167	LAMB2	laminin, beta 2 (laminin S)
bta04151	282307	PIK3R1	phosphoinositide-3-kinase regulatory subunit 1
bta04151	515854	SGK1	serum/glucocorticoid regulated kinase 1
bta04151	526585	F2R	coagulation factor II thrombin receptor
bta04151	535951	ITGA1	integrin subunit alpha 1
bta05165	532572	LAMC1	laminin subunit gamma 1
bta05165	281667	CCNA2	cyclin A2
bta05165	534129	CREB5	cAMP responsive element binding protein 5
bta05165	524530	CCND1	cyclin D1
bta05165	100139219	MTOR	mechanistic target of rapamycin kinase
bta05165	539337	WNT10B	Wnt family member 10B
bta05165	533199	MAP2K1	mitogen-activated protein kinase kinase 1
bta05165	509855	IRF9	interferon regulatory factor 9
bta05165	523755	ITGA11	integrin subunit alpha 11
bta05165	787607	PPP2R3A	protein phosphatase 2 regulatory subunit B''alpha
bta05165	512571	PKM	pyruvate kinase M1/2
bta05165	615013	BAD	BCL2 associated agonist of cell death
bta05165	100138150	PPP2R1B	protein phosphatase 2 scaffold subunit Abeta
bta05165	521196	RAF1	Raf-1 proto-oncogene, serine/threonine kinase
bta05165	327687	ATP6AP1	ATPase H+ transporting accessory protein 1
bta05165	536286	ITGB8	integrin subunit beta 8
bta05165	504985	TSC2	TSC complex subunit 2
bta05165	533294	RBL2	RB transcriptional corepressor like 2
bta05165	280794	FN1	fibronectin 1
bta05165	281872	ITGA2	integrin subunit alpha 2
bta05165	282188	COL1A2	collagen type I alpha 2 chain
bta05165	540664	TNC	tenascin C
bta05165	538436	CCNE2	cyclin E2
bta05165	511043	LAMC2	laminin subunit gamma 2
bta05165	282147	ATP6V1A	ATPase H+ transporting V1 subunit A
bta05165	529566	CREB3L4	cAMP responsive element binding protein 3 like 4
bta05165	282306	PIK3CA	phosphatidylinositol-4,5-bisphosphate 3-kinase catalytic subunit alpha
bta05165	287017	ATP6V1E1	ATPase H+ transporting V1 subunit E1
bta05165	508233	RELA	RELA proto-oncogene, NF-kB subunit
bta05165	530102	COL6A6	collagen type VI alpha 6 chain
bta05165	505757	PPP2R5C	protein phosphatase 2 regulatory subunit B'gamma
bta05165	513497	CDKN1A	cyclin dependent kinase inhibitor 1A
bta05165	509613	EIF4EBP1	eukaryotic translation initiation factor 4E binding protein 1
bta05165	783681	JAG1	jagged canonical Notch ligand 1
bta05165	281499	SPP1	secreted phosphoprotein 1
bta05165	493720	FADD	Fas associated via death domain
bta05165	533949	BCAP31	B cell receptor associated protein 31
bta05165	282642	ITGB3	integrin subunit beta 3
bta05165	783484	MAGI1	membrane associated guanylate kinase, WW and PDZ domain containing 1
bta05165	513730	NOTCH2	notch receptor 2
bta05165	508490	ITGA3	integrin subunit alpha 3
bta05165	347700	EIF2AK2	eukaryotic translation initiation factor 2 alpha kinase 2
bta05165	100336926	MAML1	mastermind like transcriptional coactivator 1
bta05165	529670	LAMA4	laminin subunit alpha 4
bta05165	509882	DLG3	discs large MAGUK scaffold protein 3
bta05165	513105	CREB3L1	cAMP responsive element binding protein 3 like 1
bta05165	538507	FZD2	frizzled class receptor 2
bta05165	785291	DLG1	discs large MAGUK scaffold protein 1
bta05165	535043	ITGA6	integrin subunit alpha 6
bta05165	404152	ATP6V1D	ATPase H+ transporting V1 subunit D
bta05165	511619	AXIN2	axin 2
bta05165	504531	PIK3CD	phosphatidylinositol-4,5-bisphosphate 3-kinase catalytic subunit delta
bta05165	281542	TP53	tumor protein p53
bta05165	535951	ITGA1	integrin subunit alpha 1
bta05165	520167	LAMB2	laminin, beta 2 (laminin S)
bta05165	282307	PIK3R1	phosphoinositide-3-kinase regulatory subunit 1
bta05165	767866	NOTCH1	notch receptor 1
bta05165	515303	TCF7L1	transcription factor 7 like 1
bta05165	550622	ATP6V0C	ATPase H+ transporting V0 subunit c
bta05165	510434	MAP2K2	mitogen-activated protein kinase kinase 2
bta05165	537201	JAK1	Janus kinase 1
bta05165	527165	PDGFRB	platelet derived growth factor receptor beta
bta05165	281530	THBS1	thrombospondin 1
bta05165	282405	ATP6V1F	ATPase H+ transporting V1 subunit F
bta05165	512613	CDKN1B	cyclin dependent kinase inhibitor 1B
bta05165	280991	AKT1	AKT serine/threonine kinase 1
bta05165	506270	PTK2	protein tyrosine kinase 2
bta05165	789485	NOTCH3	notch receptor 3
bta05165	615414	CCND2	cyclin D2
bta05165	338082	ATP6V1B2	ATPase H+ transporting V1 subunit B2
bta05165	514090	BAK1	BCL2 antagonist/killer 1
bta05165	282654	TNXB	tenascin XB
bta05165	338075	ATP6V0E1	ATPase H+ transporting V0 subunit e1
bta05165	282148	ATP6V0D1	ATPase H+ transporting V0 subunit d1
bta05165	281713	CREB1	cAMP responsive element binding protein 1
bta05165	520030	LAMB1	laminin subunit beta 1
bta05165	533233	APC	APC regulator of WNT signaling pathway
bta05165	533147	PPP2R3C	protein phosphatase 2 regulatory subunit B''gamma
bta05165	524870	RBL1	RB transcriptional corepressor like 1
bta05165	445417	FZD1	frizzled class receptor 1
bta05165	539547	HES1	hes family bHLH transcription factor 1
bta05165	281873	ITGA5	integrin subunit alpha 5
bta05165	516433	HES2	hes family bHLH transcription factor 2
bta05165	539003	CTNNB1	catenin beta 1
bta05165	282527	TNFRSF1A	TNF receptor superfamily member 1A
bta05165	519217	CDK2	cyclin dependent kinase 2
bta05165	530005	WNT5A	Wnt family member 5A
bta05165	511308	WNT9A	Wnt family member 9A
bta05165	516209	LFNG	LFNG O-fucosylpeptide 3-beta-N-acetylglucosaminyltransferase
bta05165	506953	ITGA7	integrin subunit alpha 7
bta05165	408016	CASP3	caspase 3
bta05165	510814	STAT1	signal transducer and activator of transcription 1
bta05165	507480	HES4	hes family bHLH transcription factor 4
bta05165	282187	COL1A1	collagen type I alpha 1 chain
bta05165	508008	WNT5B	Wnt family member 5B
bta05165	616913	FZD8	frizzled class receptor 8
bta05165	533440	TSC1	TSC complex subunit 1
bta05165	445416	FZD4	frizzled class receptor 4
bta05165	528109	PALS1	protein associated with LIN7 1, MAGUK family member
bta05165	506387	LAMA1	laminin subunit alpha 1
bta05165	523325	DVL1	dishevelled segment polarity protein 1
bta05165	282023	PTGS2	prostaglandin-endoperoxide synthase 2
bta05165	506238	PSMC1	proteasome 26S subunit, ATPase 1
bta05165	504357	AXIN1	axin 1
bta05165	517456	PXN	paxillin
bta05165	282308	PIK3R2	phosphoinositide-3-kinase regulatory subunit 2
bta05165	511602	COL4A5	collagen type IV alpha 5 chain
bta05165	785805	COL6A5	collagen type VI alpha 5 chain
bta05165	338089	ATP6V1C1	ATPase H+ transporting V1 subunit C1
bta05165	407107	COL4A4	collagen type IV alpha 4 chain
bta05165	100336873	LAMA3	laminin subunit alpha 3
bta05165	516979	IRF3	interferon regulatory factor 3
bta05165	505942	COL9A2	collagen type IX alpha 2 chain
bta05165	286768	ATP6V0A1	ATPase H+ transporting V0 subunit a1
bta05165	100298789	PPP2R3B	protein phosphatase 2 regulatory subunit B''beta
bta05165	407223	HDAC2	histone deacetylase 2
bta05165	506083	RPS6KB2	ribosomal protein S6 kinase B2
bta05165	515680	NFX1	nuclear transcription factor, X-box binding 1
bta05165	538536	FZD5	frizzled class receptor 5
bta05165	506526	ITGA10	integrin subunit alpha 10
bta05165	281572	VEGFA	vascular endothelial growth factor A
bta05165	505684	ATP6V0B	ATPase H+ transporting V0 subunit b
bta05165	540216	TUBG2	tubulin gamma 2
bta05165	506618	FOXO1	forkhead box O1
bta05165	781865	LLGL1	LLGL scribble cell polarity complex component 1
bta05165	504323	THBS3	thrombospondin 3
bta05165	281876	ITGB1	integrin subunit beta 1
bta04010	533908	RPS6KA1	ribosomal protein S6 kinase A1
bta04010	790867	PPP3CB	protein phosphatase 3 catalytic subunit beta
bta04010	536051	BRAF	B-Raf proto-oncogene, serine/threonine kinase
bta04010	616317	STMN1	stathmin 1
bta04010	507319	EFNA1	ephrin A1
bta04010	508233	RELA	RELA proto-oncogene, NF-kB subunit
bta04010	505908	PDGFA	platelet derived growth factor subunit A
bta04010	519331	CACNG4	calcium voltage-gated channel auxiliary subunit gamma 4
bta04010	614453	EFNA2	ephrin A2
bta04010	508367	MAP3K14	mitogen-activated protein kinase kinase kinase 14
bta04010	282879	HGF	hepatocyte growth factor
bta04010	282140	ANGPT1	angiopoietin 1
bta04010	539175	DUSP1	dual specificity phosphatase 1
bta04010	327667	CACNB2	calcium voltage-gated channel auxiliary subunit beta 2
bta04010	541175	DUSP10	dual specificity phosphatase 10
bta04010	534069	TGFB2	transforming growth factor beta 2
bta04010	532393	NTF3	neurotrophin 3
bta04010	541127	NFATC3	nuclear factor of activated T cells 3
bta04010	504592	MAP3K2	mitogen-activated protein kinase kinase kinase 2
bta04010	504939	GADD45G	growth arrest and DNA damage inducible gamma
bta04010	533199	MAP2K1	mitogen-activated protein kinase kinase 1
bta04010	540616	MAX	MYC associated factor X
bta04010	505369	MAP3K13	mitogen-activated protein kinase kinase kinase 13
bta04010	282121	VEGFB	vascular endothelial growth factor B
bta04010	521196	RAF1	Raf-1 proto-oncogene, serine/threonine kinase
bta04010	615215	MAPKAPK3	MAPK activated protein kinase 3
bta04010	507061	DUSP5	dual specificity phosphatase 5
bta04010	618906	MAPK11	mitogen-activated protein kinase 11
bta04010	613533	FLNB	filamin B
bta04010	280831	JUN	Jun proto-oncogene, AP-1 transcription factor subunit
bta04010	540803	MRAS	muscle RAS oncogene homolog
bta04010	525647	MKNK1	MAPK interacting serine/threonine kinase 1
bta04010	512798	EPHA2	EPH receptor A2
bta04010	281160	FGF1	fibroblast growth factor 1
bta04010	281885	KITLG	KIT ligand
bta04010	507204	NLK	nemo like kinase
bta04010	512943	MAPK12	mitogen-activated protein kinase 12
bta04010	527165	PDGFRB	platelet derived growth factor receptor beta
bta04010	535376	TGFBR2	transforming growth factor beta receptor 2
bta04010	511190	RPS6KA3	ribosomal protein S6 kinase A3
bta04010	510434	MAP2K2	mitogen-activated protein kinase kinase 2
bta04010	533953	IRAK1	interleukin 1 receptor associated kinase 1
bta04010	280991	AKT1	AKT serine/threonine kinase 1
bta04010	518180	CRKL	CRK like proto-oncogene, adaptor protein
bta04010	507245	ECSIT	ECSIT signaling integrator
bta04010	511779	MAP3K4	mitogen-activated protein kinase kinase kinase 4
bta04010	615727	DUSP8	dual specificity phosphatase 8
bta04010	618405	GADD45B	growth arrest and DNA damage inducible beta
bta04010	505824	NTRK2	neurotrophic receptor tyrosine kinase 2
bta04010	777788	DDIT3	DNA damage inducible transcript 3
bta04010	515310	DUSP6	dual specificity phosphatase 6
bta04010	505847	CDC25B	cell division cycle 25B
bta04010	528390	NR4A1	nuclear receptor subfamily 4 group A member 1
bta04010	326285	FGF10	fibroblast growth factor 10
bta04010	619066	RAC3	Rac family small GTPase 3
bta04010	282032	RASA1	RAS p21 protein activator 1
bta04010	281542	TP53	tumor protein p53
bta04010	281094	CSF1	colony stimulating factor 1
bta04010	526392	NFKB2	nuclear factor kappa B subunit 2
bta04010	615850	PTPN5	protein tyrosine phosphatase non-receptor type 5
bta04010	537703	MAPK7	mitogen-activated protein kinase 7
bta04010	540380	DUSP4	dual specificity phosphatase 4
bta04010	524957	RASGRF2	Ras protein specific guanine nucleotide releasing factor 2
bta04010	539334	IL1RAP	interleukin 1 receptor accessory protein
bta04010	282527	TNFRSF1A	TNF receptor superfamily member 1A
bta04010	281048	CD14	CD14 molecule
bta04010	282382	TGFBR1	transforming growth factor beta receptor 1
bta04010	408016	CASP3	caspase 3
bta04010	282413	CACNA1I	calcium voltage-gated channel subunit alpha1 I
bta04010	282122	VEGFC	vascular endothelial growth factor C
bta04010	280894	PGF	placental growth factor
bta04010	516039	MAP2K3	mitogen-activated protein kinase kinase 3
bta04010	100295732	MAP2K5	mitogen-activated protein kinase kinase 5
bta04010	404193	FGFR2	fibroblast growth factor receptor 2
bta04010	533929	FGF18	fibroblast growth factor 18
bta04010	507624	MAP4K3	mitogen-activated protein kinase kinase kinase kinase 3
bta04010	509827	ATF2	activating transcription factor 2
bta04010	540203	TAB2	TGF-beta activated kinase 1 (MAP3K7) binding protein 2
bta04010	408015	CACNA1C	calcium voltage-gated channel subunit alpha1 C
bta04010	504336	DAXX	death domain associated protein
bta04010	509109	MAP4K4	mitogen-activated protein kinase kinase kinase kinase 4
bta04010	100295476	EREG	epiregulin
bta04010	505709	ERBB2	erb-b2 receptor tyrosine kinase 2
bta04010	282412	CACNA1H	calcium voltage-gated channel subunit alpha1 H
bta04010	505463	GADD45A	growth arrest and DNA damage inducible alpha
bta04010	281572	VEGFA	vascular endothelial growth factor A
bta04010	520058	MAP4K2	mitogen-activated protein kinase kinase kinase kinase 2
bta04010	282411	CACNA1G	calcium voltage-gated channel subunit alpha1 G
bta04010	539835	HSPA6	heat shock protein family A (Hsp70) member 6
bta04010	529146	MAP3K7	mitogen-activated protein kinase kinase kinase 7
bta04010	281831	HSPA8	heat shock protein family A (Hsp70) member 8
bta04010	281827	HSPA2	heat shock protein family A (Hsp70) member 2
bta04010	613787	PDGFC	platelet derived growth factor C
bta04010	505485	PLA2G4B	phospholipase A2, group IVB (cytosolic)
bta04010	526227	RPS6KA6	ribosomal protein S6 kinase A6
bta04010	520039	RASGRF1	Ras protein specific guanine nucleotide releasing factor 1
bta04010	615432	DUSP3	dual specificity phosphatase 3
bta04010	540106	PDGFB	platelet derived growth factor subunit B
bta04010	281769	FGFR3	fibroblast growth factor receptor 3
bta04010	538957	TGFB3	transforming growth factor beta 3
bta04010	616885	FGF7	fibroblast growth factor 7
bta04010	510245	PPP5C	protein phosphatase 5 catalytic subunit
bta04010	512056	RASGRP2	RAS guanyl releasing protein 2
bta04010	616503	RRAS	RAS related
bta04010	535327	MAPK13	mitogen-activated protein kinase 13
bta04010	515640	IL1R1	interleukin 1 receptor type 1
bta04010	533692	IRAK4	interleukin 1 receptor associated kinase 4
bta04010	788091	MAPKAPK2	MAPK activated protein kinase 2
bta04010	282321	PPP3R1	protein phosphatase 3 regulatory subunit B, alpha
bta04010	509107	ATF4	activating transcription factor 4
bta04010	786886	ELK1	ETS transcription factor ELK1
bta05020	3283881	ATP8	ATP synthase F0 subunit 8
bta05020	537376	RYR2	ryanodine receptor 2
bta05020	3283888	ND6	NADH dehydrogenase subunit 6
bta05020	513461	PSMD11	proteasome 26S subunit, non-ATPase 11
bta05020	539835	HSPA6	heat shock protein family A (Hsp70) member 6
bta05020	327710	NDUFA8	NADH:ubiquinone oxidoreductase subunit A8
bta05020	505708	PRKCD	protein kinase C delta
bta05020	613541	NDUFA4L2	NDUFA4 mitochondrial complex associated like 2
bta05020	514237	PSMB1	proteasome 20S subunit beta 1
bta05020	539235	CSNK2B	casein kinase 2 beta
bta05020	338060	NDUFA10	NADH:ubiquinone oxidoreductase subunit A10
bta05020	338053	ATP5MC1	ATP synthase membrane subunit c locus 1
bta05020	282120	VDAC2	voltage dependent anion channel 2
bta05020	534640	PSMB5	proteasome 20S subunit beta 5
bta05020	515503	PSMA1	proteasome 20S subunit alpha 1
bta05020	530186	PSMC2	proteasome 26S subunit, ATPase 2
bta05020	535327	MAPK13	mitogen-activated protein kinase 13
bta05020	3283885	ND4L	NADH dehydrogenase subunit 4L
bta05020	281879	ITPR3	inositol 1,4,5-trisphosphate receptor type 3
bta05020	326346	NDUFA11	NADH:ubiquinone oxidoreductase subunit A11
bta05020	282308	PIK3R2	phosphoinositide-3-kinase regulatory subunit 2
bta05020	535683	PSMD14	proteasome 26S subunit, non-ATPase 14
bta05020	509107	ATF4	activating transcription factor 4
bta05020	767981	SEM1	SEM1 26S proteasome subunit
bta05020	537782	APAF1	apoptotic peptidase activating factor 1
bta05020	282321	PPP3R1	protein phosphatase 3 regulatory subunit B, alpha
bta05020	281831	HSPA8	heat shock protein family A (Hsp70) member 8
bta05020	281481	SDHD	succinate dehydrogenase complex subunit D
bta05020	506238	PSMC1	proteasome 26S subunit, ATPase 1
bta05020	281827	HSPA2	heat shock protein family A (Hsp70) member 2
bta05020	511207	PSMB7	proteasome 20S subunit beta 7
bta05020	282289	NDUFC1	NADH:ubiquinone oxidoreductase subunit C1
bta05020	510029	PSMC4	proteasome 26S subunit, ATPase 4
bta05020	506203	PSMB4	proteasome 20S subunit beta 4
bta05020	338046	NDUFC2	NADH:ubiquinone oxidoreductase subunit C2
bta05020	287027	NDUFS8	NADH:ubiquinone oxidoreductase core subunit S8
bta05020	327698	NDUFA2	NADH:ubiquinone oxidoreductase subunit A2
bta05020	338063	NDUFA7	NADH:ubiquinone oxidoreductase subunit A7
bta05020	327691	NDUFS6	NADH:ubiquinone oxidoreductase subunit S6
bta05020	282479	SLC25A5	solute carrier family 25 member 5
bta05020	408016	CASP3	caspase 3
bta05020	509827	ATF2	activating transcription factor 2
bta05020	540176	ATP5MC3	ATP synthase membrane subunit c locus 3
bta05020	408015	CACNA1C	calcium voltage-gated channel subunit alpha1 C
bta05020	504937	PSMD3	proteasome 26S subunit, non-ATPase 3
bta05020	282419	CSNK2A1	casein kinase 2 alpha 1
bta05020	338081	ATP5F1D	ATP synthase F1 subunit delta
bta05020	327673	NDUFA1	NADH:ubiquinone oxidoreductase subunit A1
bta05020	533874	PSMB3	proteasome 20S subunit beta 3
bta05020	512891	PSMD8	proteasome 26S subunit, non-ATPase 8
bta05020	539149	TUBB4B	tubulin beta 4B class IVb
bta05020	281713	CREB1	cAMP responsive element binding protein 1
bta05020	281040	CAV1	caveolin 1
bta05020	407125	EGR1	early growth response 1
bta05020	282478	SLC25A4	solute carrier family 25 member 4
bta05020	512943	MAPK12	mitogen-activated protein kinase 12
bta05020	538625	PSMD6	proteasome 26S subunit, non-ATPase 6
bta05020	518136	KLC2	kinesin light chain 2
bta05020	327675	ATP5F1B	ATP synthase F1 subunit beta
bta05020	618906	MAPK11	mitogen-activated protein kinase 11
bta05020	280826	IL6	interleukin 6
bta05020	767866	NOTCH1	notch receptor 1
bta05020	514261	KIF5B	kinesin family member 5B
bta05020	282307	PIK3R1	phosphoinositide-3-kinase regulatory subunit 1
bta05020	415113	HSPA5	heat shock protein family A (Hsp70) member 5
bta05020	513105	CREB3L1	cAMP responsive element binding protein 3 like 1
bta05020	540236	TUBB4A	tubulin beta 4A class IVa
bta05020	512456	PSMD7	proteasome 26S subunit, non-ATPase 7
bta05020	777788	DDIT3	DNA damage inducible transcript 3
bta05020	504531	PIK3CD	phosphatidylinositol-4,5-bisphosphate 3-kinase catalytic subunit delta
bta05020	616000	GRIN3B	glutamate ionotropic receptor NMDA type subunit 3B
bta05020	493642	CAV2	caveolin 2
bta05020	282701	ATP5PB	ATP synthase peripheral stalk-membrane subunit b
bta05020	539141	PSMA2	proteasome 20S subunit alpha 2
bta05020	508448	PSMC3	proteasome 26S subunit, ATPase 3
bta05020	516919	PSMB2	proteasome 20S subunit beta 2
bta05020	519729	ADRM1	ADRM1 26S proteasome ubiquitin receptor
bta05020	327697	NDUFS2	NADH:ubiquinone oxidoreductase core subunit S2
bta05020	615087	TUBB	tubulin beta class I
bta05020	338073	NDUFB3	NADH:ubiquinone oxidoreductase subunit B3
bta05020	282306	PIK3CA	phosphatidylinositol-4,5-bisphosphate 3-kinase catalytic subunit alpha
bta05020	327690	NDUFB1	NADH:ubiquinone oxidoreductase subunit B1
bta05020	529566	CREB3L4	cAMP responsive element binding protein 3 like 4
bta05020	790867	PPP3CB	protein phosphatase 3 catalytic subunit beta
bta05020	777775	TUBA4A	tubulin alpha 4a
bta05020	327696	SDHC	succinate dehydrogenase complex subunit C
bta05020	3283884	ND3	NADH dehydrogenase subunit 3
bta05020	539784	PSMD2	proteasome 26S subunit ubiquitin receptor, non-ATPase 2
bta05020	327660	NDUFB9	NADH:ubiquinone oxidoreductase subunit B9
bta05020	513525	PSMD13	proteasome 26S subunit, non-ATPase 13
bta05020	535820	EIF2AK3	eukaryotic translation initiation factor 2 alpha kinase 3
bta05020	338079	NDUFS7	NADH:ubiquinone oxidoreductase core subunit S7
bta05020	282015	PSMC5	proteasome 26S subunit, ATPase 5
bta05020	615013	BAD	BCL2 associated agonist of cell death
bta05020	510069	PSMB6	proteasome 20S subunit beta 6
bta05020	282016	PSMD4	proteasome 26S subunit ubiquitin receptor, non-ATPase 4
bta05020	532572	LAMC1	laminin subunit gamma 1
bta05020	287014	NDUFV1	NADH:ubiquinone oxidoreductase core subunit V1
bta05020	404188	NDUFA9	NADH:ubiquinone oxidoreductase subunit A9
bta05020	282517	NDUFB8	NADH:ubiquinone oxidoreductase subunit B8
bta05020	281480	SDHA	succinate dehydrogenase complex flavoprotein subunit A
bta05020	534129	CREB5	cAMP responsive element binding protein 5
bta05020	3283889	CYTB	cytochrome b
bta05020	282480	SLC25A6	solute carrier family 25 member 6
bta05020	511803	PSMD1	proteasome 26S subunit, non-ATPase 1
bta05016	338053	ATP5MC1	ATP synthase membrane subunit c locus 1
bta05016	338060	NDUFA10	NADH:ubiquinone oxidoreductase subunit A10
bta05016	282120	VDAC2	voltage dependent anion channel 2
bta05016	281496	SOD2	superoxide dismutase 2
bta05016	534640	PSMB5	proteasome 20S subunit beta 5
bta05016	327710	NDUFA8	NADH:ubiquinone oxidoreductase subunit A8
bta05016	613541	NDUFA4L2	NDUFA4 mitochondrial complex associated like 2
bta05016	514237	PSMB1	proteasome 20S subunit beta 1
bta05016	517263	AMBRA1	autophagy and beclin 1 regulator 1
bta05016	614776	POLR2K	RNA polymerase II, I and III subunit K
bta05016	407223	HDAC2	histone deacetylase 2
bta05016	512971	POLR2E	RNA polymerase II, I and III subunit E
bta05016	3283888	ND6	NADH dehydrogenase subunit 6
bta05016	513461	PSMD11	proteasome 26S subunit, non-ATPase 11
bta05016	3283881	ATP8	ATP synthase F0 subunit 8
bta05016	281528	TGM2	transglutaminase 2
bta05016	281481	SDHD	succinate dehydrogenase complex subunit D
bta05016	526320	POLR2G	RNA polymerase II subunit G
bta05016	506238	PSMC1	proteasome 26S subunit, ATPase 1
bta05016	511575	GPX8	glutathione peroxidase 8 (putative)
bta05016	767981	SEM1	SEM1 26S proteasome subunit
bta05016	536654	GNAQ	G protein subunit alpha q
bta05016	537782	APAF1	apoptotic peptidase activating factor 1
bta05016	515503	PSMA1	proteasome 20S subunit alpha 1
bta05016	530186	PSMC2	proteasome 26S subunit, ATPase 2
bta05016	100298754	DNAH5	dynein axonemal heavy chain 5
bta05016	3283885	ND4L	NADH dehydrogenase subunit 4L
bta05016	326346	NDUFA11	NADH:ubiquinone oxidoreductase subunit A11
bta05016	535683	PSMD14	proteasome 26S subunit, non-ATPase 14
bta05016	327691	NDUFS6	NADH:ubiquinone oxidoreductase subunit S6
bta05016	338063	NDUFA7	NADH:ubiquinone oxidoreductase subunit A7
bta05016	408016	CASP3	caspase 3
bta05016	282479	SLC25A5	solute carrier family 25 member 5
bta05016	531436	IFT57	intraflagellar transport 57
bta05016	514371	ACTR1A	actin related protein 1A
bta05016	287027	NDUFS8	NADH:ubiquinone oxidoreductase core subunit S8
bta05016	327698	NDUFA2	NADH:ubiquinone oxidoreductase subunit A2
bta05016	338046	NDUFC2	NADH:ubiquinone oxidoreductase subunit C2
bta05016	506203	PSMB4	proteasome 20S subunit beta 4
bta05016	511083	ACTR10	actin related protein 10
bta05016	511207	PSMB7	proteasome 20S subunit beta 7
bta05016	282289	NDUFC1	NADH:ubiquinone oxidoreductase subunit C1
bta05016	112442685	ERN1	endoplasmic reticulum to nucleus signaling 1
bta05016	510029	PSMC4	proteasome 26S subunit, ATPase 4
bta05016	533874	PSMB3	proteasome 20S subunit beta 3
bta05016	512891	PSMD8	proteasome 26S subunit, non-ATPase 8
bta05016	539149	TUBB4B	tubulin beta 4B class IVb
bta05016	281713	CREB1	cAMP responsive element binding protein 1
bta05016	338081	ATP5F1D	ATP synthase F1 subunit delta
bta05016	327673	NDUFA1	NADH:ubiquinone oxidoreductase subunit A1
bta05016	282312	POLR2A	RNA polymerase II subunit A
bta05016	100125305	ACTR1B	actin related protein 1B
bta05016	540176	ATP5MC3	ATP synthase membrane subunit c locus 3
bta05016	504937	PSMD3	proteasome 26S subunit, non-ATPase 3
bta05016	513049	ATG101	autophagy related 101
bta05016	514327	DCTN3	dynactin subunit 3
bta05016	100137840	DLG4	discs large MAGUK scaffold protein 4
bta05016	514261	KIF5B	kinesin family member 5B
bta05016	518504	SIN3A	SIN3 transcription regulator family member A
bta05016	327675	ATP5F1B	ATP synthase F1 subunit beta
bta05016	518136	KLC2	kinesin light chain 2
bta05016	505599	POLR2H	RNA polymerase II, I and III subunit H
bta05016	281078	CLTA	clathrin light chain A
bta05016	515216	AP2A2	adaptor related protein complex 2 subunit alpha 2
bta05016	538625	PSMD6	proteasome 26S subunit, non-ATPase 6
bta05016	536553	AP2S1	adaptor related protein complex 2 subunit sigma 1
bta05016	287026	PLCB1	phospholipase C beta 1
bta05016	540428	POLR2J	RNA polymerase II subunit J
bta05016	614472	POLR2I	RNA polymerase II subunit I
bta05016	282478	SLC25A4	solute carrier family 25 member 4
bta05016	519729	ADRM1	ADRM1 26S proteasome ubiquitin receptor
bta05016	516919	PSMB2	proteasome 20S subunit beta 2
bta05016	327697	NDUFS2	NADH:ubiquinone oxidoreductase core subunit S2
bta05016	338073	NDUFB3	NADH:ubiquinone oxidoreductase subunit B3
bta05016	615087	TUBB	tubulin beta class I
bta05016	282701	ATP5PB	ATP synthase peripheral stalk-membrane subunit b
bta05016	539141	PSMA2	proteasome 20S subunit alpha 2
bta05016	508448	PSMC3	proteasome 26S subunit, ATPase 3
bta05016	618422	HAP1	huntingtin associated protein 1
bta05016	281542	TP53	tumor protein p53
bta05016	513105	CREB3L1	cAMP responsive element binding protein 3 like 1
bta05016	540236	TUBB4A	tubulin beta 4A class IVa
bta05016	512456	PSMD7	proteasome 26S subunit, non-ATPase 7
bta05016	539784	PSMD2	proteasome 26S subunit ubiquitin receptor, non-ATPase 2
bta05016	327660	NDUFB9	NADH:ubiquinone oxidoreductase subunit B9
bta05016	513525	PSMD13	proteasome 26S subunit, non-ATPase 13
bta05016	777775	TUBA4A	tubulin alpha 4a
bta05016	327696	SDHC	succinate dehydrogenase complex subunit C
bta05016	3283884	ND3	NADH dehydrogenase subunit 3
bta05016	327690	NDUFB1	NADH:ubiquinone oxidoreductase subunit B1
bta05016	529566	CREB3L4	cAMP responsive element binding protein 3 like 4
bta05016	781037	MAP3K10	mitogen-activated protein kinase kinase kinase 10
bta05016	404188	NDUFA9	NADH:ubiquinone oxidoreductase subunit A9
bta05016	282517	NDUFB8	NADH:ubiquinone oxidoreductase subunit B8
bta05016	281698	CLTB	clathrin light chain B
bta05016	281480	SDHA	succinate dehydrogenase complex flavoprotein subunit A
bta05016	534129	CREB5	cAMP responsive element binding protein 5
bta05016	3283889	CYTB	cytochrome b
bta05016	282480	SLC25A6	solute carrier family 25 member 6
bta05016	511803	PSMD1	proteasome 26S subunit, non-ATPase 1
bta05016	100139219	MTOR	mechanistic target of rapamycin kinase
bta05016	506441	DCTN5	dynactin subunit 5
bta05016	287014	NDUFV1	NADH:ubiquinone oxidoreductase core subunit V1
bta05016	281080	CLTC	clathrin heavy chain
bta05016	510069	PSMB6	proteasome 20S subunit beta 6
bta05016	282016	PSMD4	proteasome 26S subunit ubiquitin receptor, non-ATPase 4
bta05016	282015	PSMC5	proteasome 26S subunit, ATPase 5
bta05016	338079	NDUFS7	NADH:ubiquinone oxidoreductase core subunit S7
bta05016	511045	DCTN1	dynactin subunit 1
bta05016	528410	WIPI1	WD repeat domain, phosphoinositide interacting 1
bta05016	512685	WIPI2	WD repeat domain, phosphoinositide interacting 2
bta05016	615059	HTT	huntingtin
bta04141	540564	RAD23A	RAD23 homolog A, nucleotide excision repair protein
bta04141	507936	UBXN6	UBX domain protein 6
bta04141	767980	SSR3	signal sequence receptor subunit 3
bta04141	505089	SEC24A	SEC24 homolog A, COPII coat complex component
bta04141	507939	RPN1	ribophorin I
bta04141	505941	RRBP1	ribosome binding protein 1
bta04141	533949	BCAP31	B cell receptor associated protein 31
bta04141	281832	HSP90AA1	heat shock protein 90 alpha family class A member 1
bta04141	507165	HSPH1	heat shock protein family H (Hsp110) member 1
bta04141	506103	UBE2J2	ubiquitin conjugating enzyme E2 J2
bta04141	531964	SEC31A	SEC31 homolog A, COPII coat complex component
bta04141	533603	DNAJB12	DnaJ heat shock protein family (Hsp40) member B12
bta04141	504474	STT3B	STT3 oligosaccharyltransferase complex catalytic subunit B
bta04141	533021	UBQLN4	ubiquilin 4
bta04141	508519	NPLOC4	NPL4 homolog, ubiquitin recognition factor
bta04141	282392	UBQLN1	ubiquilin 1
bta04141	535820	EIF2AK3	eukaryotic translation initiation factor 2 alpha kinase 3
bta04141	515784	CKAP4	cytoskeleton associated protein 4
bta04141	281036	CALR	calreticulin
bta04141	516399	UGGT2	UDP-glucose glycoprotein glucosyltransferase 2
bta04141	615027	TXNDC5	thioredoxin domain containing 5
bta04141	415113	HSPA5	heat shock protein family A (Hsp70) member 5
bta04141	534231	RPN2	ribophorin II
bta04141	404121	DERL1	derlin 1
bta04141	615007	TUSC3	tumor suppressor candidate 3
bta04141	506316	DNAJB11	DnaJ heat shock protein family (Hsp40) member B11
bta04141	614334	DERL3	derlin 3
bta04141	524459	RNF185	ring finger protein 185
bta04141	506073	PLAA	phospholipase A2 activating protein
bta04141	535287	UBE2D1	ubiquitin conjugating enzyme E2 D1
bta04141	347700	EIF2AK2	eukaryotic translation initiation factor 2 alpha kinase 2
bta04141	506107	BAG2	BAG cochaperone 2
bta04141	538938	SEC62	SEC62 homolog, preprotein translocation factor
bta04141	529312	SSR1	signal sequence receptor subunit 1
bta04141	777788	DDIT3	DNA damage inducible transcript 3
bta04141	519058	EDEM3	ER degradation enhancing alpha-mannosidase like protein 3
bta04141	511649	LMAN1	lectin, mannose binding 1
bta04141	281020	BCL2	BCL2 apoptosis regulator
bta04141	790880	ATXN3	ataxin 3
bta04141	613855	BAG1	BAG cochaperone 1
bta04141	507815	STT3A	STT3 oligosaccharyltransferase complex catalytic subunit A
bta04141	790870	LMAN2	lectin, mannose binding 2
bta04141	517171	SAR1A	secretion associated Ras related GTPase 1A
bta04141	506676	UBXN1	UBX domain protein 1
bta04141	281803	PDIA3	protein disulfide isomerase family A member 3
bta04141	516155	MOGS	mannosyl-oligosaccharide glucosidase
bta04141	112442685	ERN1	endoplasmic reticulum to nucleus signaling 1
bta04141	533994	SEC23A	SEC23 homolog A, COPII coat complex component
bta04141	526612	NSFL1C	NSFL1 cofactor
bta04141	514090	BAK1	BCL2 antagonist/killer 1
bta04141	530027	MAN1A1	mannosidase alpha class 1A member 1
bta04141	613927	PDIA6	protein disulfide isomerase family A member 6
bta04141	510682	DDOST	dolichyl-diphosphooligosaccharide--protein glycosyltransferase non-catalytic subunit
bta04141	538426	DNAJB1	DnaJ heat shock protein family (Hsp40) member B1
bta04141	497024	NFE2L2	nuclear factor, erythroid 2 like 2
bta04141	507345	VCP	valosin containing protein
bta04141	514688	PPP1R15A	protein phosphatase 1 regulatory subunit 15A
bta04141	282646	HSP90B1	heat shock protein 90 beta family member 1
bta04141	615427	SKP1	S-phase kinase associated protein 1
bta04141	415110	PDIA4	protein disulfide isomerase family A member 4
bta04141	511008	EDEM1	ER degradation enhancing alpha-mannosidase like protein 1
bta04141	512757	HSPBP1	HSPA (Hsp70) binding protein 1
bta04141	512276	SELENOS	selenoprotein S
bta04141	533736	NGLY1	N-glycanase 1
bta04141	338067	PRKCSH	protein kinase C substrate 80K-H
bta04141	504422	SEC24D	SEC24 homolog D, COPII coat complex component
bta04141	539835	HSPA6	heat shock protein family A (Hsp70) member 6
bta04141	520833	UBE4B	ubiquitination factor E4B
bta04141	507541	AMFR	autocrine motility factor receptor
bta04141	511682	MBTPS1	membrane bound transcription factor peptidase, site 1
bta04141	281831	HSPA8	heat shock protein family A (Hsp70) member 8
bta04141	282295	HYOU1	hypoxia up-regulated 1
bta04141	281827	HSPA2	heat shock protein family A (Hsp70) member 2
bta04141	541003	UBE2D2	ubiquitin conjugating enzyme E2 D2
bta04141	282216	DNAJC5	DnaJ heat shock protein family (Hsp40) member C5
bta04141	281661	CAPN1	calpain 1
bta04141	541236	XBP1	X-box binding protein 1
bta04141	281373	P4HB	prolyl 4-hydroxylase subunit beta
bta04141	509107	ATF4	activating transcription factor 4
bta05012	282478	SLC25A4	solute carrier family 25 member 4
bta05012	538625	PSMD6	proteasome 26S subunit, non-ATPase 6
bta05012	327675	ATP5F1B	ATP synthase F1 subunit beta
bta05012	518136	KLC2	kinesin light chain 2
bta05012	514261	KIF5B	kinesin family member 5B
bta05012	415113	HSPA5	heat shock protein family A (Hsp70) member 5
bta05012	510683	PINK1	PTEN induced kinase 1
bta05012	514472	TRAP1	TNF receptor associated protein 1
bta05012	540236	TUBB4A	tubulin beta 4A class IVa
bta05012	777788	DDIT3	DNA damage inducible transcript 3
bta05012	512456	PSMD7	proteasome 26S subunit, non-ATPase 7
bta05012	281542	TP53	tumor protein p53
bta05012	282701	ATP5PB	ATP synthase peripheral stalk-membrane subunit b
bta05012	539141	PSMA2	proteasome 20S subunit alpha 2
bta05012	508448	PSMC3	proteasome 26S subunit, ATPase 3
bta05012	516919	PSMB2	proteasome 20S subunit beta 2
bta05012	519729	ADRM1	ADRM1 26S proteasome ubiquitin receptor
bta05012	327697	NDUFS2	NADH:ubiquinone oxidoreductase core subunit S2
bta05012	615087	TUBB	tubulin beta class I
bta05012	338073	NDUFB3	NADH:ubiquinone oxidoreductase subunit B3
bta05012	282162	CAMK2G	calcium/calmodulin dependent protein kinase II gamma
bta05012	327690	NDUFB1	NADH:ubiquinone oxidoreductase subunit B1
bta05012	617095	CALM1	calmodulin 1
bta05012	281125	DRD1	dopamine receptor D1
bta05012	777775	TUBA4A	tubulin alpha 4a
bta05012	327696	SDHC	succinate dehydrogenase complex subunit C
bta05012	3283884	ND3	NADH dehydrogenase subunit 3
bta05012	539784	PSMD2	proteasome 26S subunit ubiquitin receptor, non-ATPase 2
bta05012	444874	UBC	ubiquitin C
bta05012	327660	NDUFB9	NADH:ubiquinone oxidoreductase subunit B9
bta05012	513525	PSMD13	proteasome 26S subunit, non-ATPase 13
bta05012	534574	MFN2	mitofusin 2
bta05012	100297344	CALM2	calmodulin 2
bta05012	535820	EIF2AK3	eukaryotic translation initiation factor 2 alpha kinase 3
bta05012	282015	PSMC5	proteasome 26S subunit, ATPase 5
bta05012	338079	NDUFS7	NADH:ubiquinone oxidoreductase core subunit S7
bta05012	510069	PSMB6	proteasome 20S subunit beta 6
bta05012	282016	PSMD4	proteasome 26S subunit ubiquitin receptor, non-ATPase 4
bta05012	281791	GNAI2	G protein subunit alpha i2
bta05012	530719	CAMK2A	calcium/calmodulin dependent protein kinase II alpha
bta05012	287014	NDUFV1	NADH:ubiquinone oxidoreductase core subunit V1
bta05012	539175	DUSP1	dual specificity phosphatase 1
bta05012	282517	NDUFB8	NADH:ubiquinone oxidoreductase subunit B8
bta05012	404188	NDUFA9	NADH:ubiquinone oxidoreductase subunit A9
bta05012	281480	SDHA	succinate dehydrogenase complex flavoprotein subunit A
bta05012	506103	UBE2J2	ubiquitin conjugating enzyme E2 J2
bta05012	282480	SLC25A6	solute carrier family 25 member 6
bta05012	3283889	CYTB	cytochrome b
bta05012	511803	PSMD1	proteasome 26S subunit, non-ATPase 1
bta05012	281293	MAOA	monoamine oxidase A
bta05012	3283881	ATP8	ATP synthase F0 subunit 8
bta05012	3283888	ND6	NADH dehydrogenase subunit 6
bta05012	513461	PSMD11	proteasome 26S subunit, non-ATPase 11
bta05012	282869	UBA1	ubiquitin like modifier activating enzyme 1
bta05012	327710	NDUFA8	NADH:ubiquinone oxidoreductase subunit A8
bta05012	613541	NDUFA4L2	NDUFA4 mitochondrial complex associated like 2
bta05012	514237	PSMB1	proteasome 20S subunit beta 1
bta05012	504336	DAXX	death domain associated protein
bta05012	514394	UCHL1	ubiquitin C-terminal hydrolase L1
bta05012	338053	ATP5MC1	ATP synthase membrane subunit c locus 1
bta05012	338060	NDUFA10	NADH:ubiquinone oxidoreductase subunit A10
bta05012	534640	PSMB5	proteasome 20S subunit beta 5
bta05012	282120	VDAC2	voltage dependent anion channel 2
bta05012	530186	PSMC2	proteasome 26S subunit, ATPase 2
bta05012	515503	PSMA1	proteasome 20S subunit alpha 1
bta05012	326346	NDUFA11	NADH:ubiquinone oxidoreductase subunit A11
bta05012	281879	ITPR3	inositol 1,4,5-trisphosphate receptor type 3
bta05012	3283885	ND4L	NADH dehydrogenase subunit 4L
bta05012	535683	PSMD14	proteasome 26S subunit, non-ATPase 14
bta05012	541236	XBP1	X-box binding protein 1
bta05012	767981	SEM1	SEM1 26S proteasome subunit
bta05012	509107	ATF4	activating transcription factor 4
bta05012	537782	APAF1	apoptotic peptidase activating factor 1
bta05012	281481	SDHD	succinate dehydrogenase complex subunit D
bta05012	506238	PSMC1	proteasome 26S subunit, ATPase 1
bta05012	286839	RPS27A	ribosomal protein S27a
bta05012	511207	PSMB7	proteasome 20S subunit beta 7
bta05012	112442685	ERN1	endoplasmic reticulum to nucleus signaling 1
bta05012	282289	NDUFC1	NADH:ubiquinone oxidoreductase subunit C1
bta05012	510029	PSMC4	proteasome 26S subunit, ATPase 4
bta05012	506203	PSMB4	proteasome 20S subunit beta 4
bta05012	338046	NDUFC2	NADH:ubiquinone oxidoreductase subunit C2
bta05012	511268	PARK7	Parkinsonism associated deglycase
bta05012	287027	NDUFS8	NADH:ubiquinone oxidoreductase core subunit S8
bta05012	327698	NDUFA2	NADH:ubiquinone oxidoreductase subunit A2
bta05012	327691	NDUFS6	NADH:ubiquinone oxidoreductase subunit S6
bta05012	282152	BCL2L1	BCL2 like 1
bta05012	338063	NDUFA7	NADH:ubiquinone oxidoreductase subunit A7
bta05012	408016	CASP3	caspase 3
bta05012	282479	SLC25A5	solute carrier family 25 member 5
bta05012	540176	ATP5MC3	ATP synthase membrane subunit c locus 3
bta05012	504937	PSMD3	proteasome 26S subunit, non-ATPase 3
bta05012	338081	ATP5F1D	ATP synthase F1 subunit delta
bta05012	327673	NDUFA1	NADH:ubiquinone oxidoreductase subunit A1
bta05012	512891	PSMD8	proteasome 26S subunit, non-ATPase 8
bta05012	533874	PSMB3	proteasome 20S subunit beta 3
bta05012	497024	NFE2L2	nuclear factor, erythroid 2 like 2
bta05012	539149	TUBB4B	tubulin beta 4B class IVb
bta05012	281557	TXN2	thioredoxin 2
bta05132	613421	ARPC5L	actin related protein 2/3 complex subunit 5 like
bta05132	506441	DCTN5	dynactin subunit 5
bta05132	508361	ELMO2	engulfment and cell motility 2
bta05132	540674	WASF3	WASP family member 3
bta05132	326600	ARPC1B	actin related protein 2/3 complex subunit 1B
bta05132	533199	MAP2K1	mitogen-activated protein kinase kinase 1
bta05132	100294979	ARF6	ADP ribosylation factor 6
bta05132	511045	DCTN1	dynactin subunit 1
bta05132	521196	RAF1	Raf-1 proto-oncogene, serine/threonine kinase
bta05132	513895	PFN1	profilin 1
bta05132	281597	ACTR3	actin related protein 3
bta05132	404122	ACTG1	actin gamma 1
bta05132	777775	TUBA4A	tubulin alpha 4a
bta05132	537396	PIK3C2B	phosphatidylinositol-4-phosphate 3-kinase catalytic subunit type 2 beta
bta05132	505361	VPS16	VPS16 core subunit of CORVET and HOPS complexes
bta05132	506218	SNX9	sorting nexin 9
bta05132	528654	VPS41	VPS41 subunit of HOPS complex
bta05132	509821	ELMO1	engulfment and cell motility 1
bta05132	540381	VPS11	VPS11 core subunit of CORVET and HOPS complexes
bta05132	618488	CYTH3	cytohesin 3
bta05132	282306	PIK3CA	phosphatidylinositol-4,5-bisphosphate 3-kinase catalytic subunit alpha
bta05132	539484	GCC2	GRIP and coiled-coil domain containing 2
bta05132	508233	RELA	RELA proto-oncogene, NF-kB subunit
bta05132	531079	TIRAP	TIR domain containing adaptor protein
bta05132	540815	ABI1	abl interactor 1
bta05132	538639	NLRP3	NLR family pyrin domain containing 3
bta05132	493720	FADD	Fas associated via death domain
bta05132	281291	M6PR	mannose-6-phosphate receptor, cation dependent
bta05132	281832	HSP90AA1	heat shock protein 90 alpha family class A member 1
bta05132	504727	RIPK1	receptor interacting serine/threonine kinase 1
bta05132	509080	PKN1	protein kinase N1
bta05132	615087	TUBB	tubulin beta class I
bta05132	513431	EXOC2	exocyst complex component 2
bta05132	540236	TUBB4A	tubulin beta 4A class IVa
bta05132	513342	DYNLRB1	dynein light chain roadblock-type 1
bta05132	540369	DYNLL2	dynein light chain LC8-type 2
bta05132	504531	PIK3CD	phosphatidylinositol-4,5-bisphosphate 3-kinase catalytic subunit delta
bta05132	281020	BCL2	BCL2 apoptosis regulator
bta05132	280828	CXCL8	C-X-C motif chemokine ligand 8
bta05132	518136	KLC2	kinesin light chain 2
bta05132	280831	JUN	Jun proto-oncogene, AP-1 transcription factor subunit
bta05132	618906	MAPK11	mitogen-activated protein kinase 11
bta05132	613533	FLNB	filamin B
bta05132	514261	KIF5B	kinesin family member 5B
bta05132	280826	IL6	interleukin 6
bta05132	515303	TCF7L1	transcription factor 7 like 1
bta05132	281249	IL18	interleukin 18
bta05132	510434	MAP2K2	mitogen-activated protein kinase kinase 2
bta05132	505568	EXOC7	exocyst complex component 7
bta05132	512943	MAPK12	mitogen-activated protein kinase 12
bta05132	538477	RALA	RAS like proto-oncogene A
bta05132	280991	AKT1	AKT serine/threonine kinase 1
bta05132	538486	ACTR2	actin related protein 2
bta05132	533953	IRAK1	interleukin 1 receptor associated kinase 1
bta05132	404151	DYNLL1	dynein light chain LC8-type 1
bta05132	516039	MAP2K3	mitogen-activated protein kinase kinase 3
bta05132	281181	GAPDH	glyceraldehyde-3-phosphate dehydrogenase
bta05132	514090	BAK1	BCL2 antagonist/killer 1
bta05132	281557	TXN2	thioredoxin 2
bta05132	539149	TUBB4B	tubulin beta 4B class IVb
bta05132	511776	RAB9A	RAB9A, member RAS oncogene family
bta05132	540838	ARPC2	actin related protein 2/3 complex subunit 2
bta05132	518622	CSE1L	chromosome segregation 1 like
bta05132	507427	RIPK3	receptor interacting serine/threonine kinase 3
bta05132	514327	DCTN3	dynactin subunit 3
bta05132	100125305	ACTR1B	actin related protein 1B
bta05132	540203	TAB2	TGF-beta activated kinase 1 (MAP3K7) binding protein 2
bta05132	615427	SKP1	S-phase kinase associated protein 1
bta05132	281536	TLR4	toll like receptor 4
bta05132	282646	HSP90B1	heat shock protein 90 beta family member 1
bta05132	518781	VPS18	VPS18 core subunit of CORVET and HOPS complexes
bta05132	282466	S100A10	S100 calcium binding protein A10
bta05132	539003	CTNNB1	catenin beta 1
bta05132	282527	TNFRSF1A	TNF receptor superfamily member 1A
bta05132	101907541	NCKAP1	NCK associated protein 1
bta05132	408016	CASP3	caspase 3
bta05132	514371	ACTR1A	actin related protein 1A
bta05132	281048	CD14	CD14 molecule
bta05132	527701	AHNAK2	AHNAK nucleoprotein 2
bta05132	511083	ACTR10	actin related protein 10
bta05132	523424	PLEKHM1	pleckstrin homology and RUN domain containing M1
bta05132	529146	MAP3K7	mitogen-activated protein kinase kinase kinase 7
bta05132	539459	ARPC4	actin related protein 2/3 complex subunit 4
bta05132	535327	MAPK13	mitogen-activated protein kinase 13
bta05132	616503	RRAS	RAS related
bta05132	539780	NAIP	NLR family apoptosis inhibitory protein
bta05132	538366	SNX18	sorting nexin 18
bta05132	539764	RAB5A	RAB5A, member RAS oncogene family
bta05132	533692	IRAK4	interleukin 1 receptor associated kinase 4
bta05132	511009	ARL8B	ADP ribosylation factor like GTPase 8B
bta05132	614345	ARPC5	actin related protein 2/3 complex subunit 5
bta05132	280979	ACTB	actin beta
bta05132	613749	RAB5C	RAB5C, member RAS oncogene family
bta05132	515552	PLEKHM2	pleckstrin homology and RUN domain containing M2
bta05132	538559	RHOG	ras homolog family member G
bta05132	520990	VPS39	VPS39 subunit of HOPS complex
bta05132	539150	RAB5B	RAB5B, member RAS oncogene family
bta04218	282120	VDAC2	voltage dependent anion channel 2
bta04218	540642	FBXW11	F-box and WD repeat domain containing 11
bta04218	281061	CDK1	cyclin dependent kinase 1
bta04218	506618	FOXO1	forkhead box O1
bta04218	616369	CDKN2A	cyclin-dependent kinase inhibitor 2A
bta04218	505463	GADD45A	growth arrest and DNA damage inducible alpha
bta04218	518897	CHEK2	checkpoint kinase 2
bta04218	282321	PPP3R1	protein phosphatase 3 regulatory subunit B, alpha
bta04218	534587	LIN9	lin-9 DREAM MuvB core complex component
bta04218	788091	MAPKAPK2	MAPK activated protein kinase 2
bta04218	281661	CAPN1	calpain 1
bta04218	510420	MYBL2	MYB proto-oncogene like 2
bta04218	535327	MAPK13	mitogen-activated protein kinase 13
bta04218	616503	RRAS	RAS related
bta04218	282308	PIK3R2	phosphoinositide-3-kinase regulatory subunit 2
bta04218	538957	TGFB3	transforming growth factor beta 3
bta04218	281879	ITPR3	inositol 1,4,5-trisphosphate receptor type 3
bta04218	282479	SLC25A5	solute carrier family 25 member 5
bta04218	282382	TGFBR1	transforming growth factor beta receptor 1
bta04218	520188	CDC25A	cell division cycle 25A
bta04218	519217	CDK2	cyclin dependent kinase 2
bta04218	538829	PPP1CB	protein phosphatase 1 catalytic subunit beta
bta04218	533440	TSC1	TSC complex subunit 1
bta04218	520157	HIPK4	homeodomain interacting protein kinase 4
bta04218	522943	NBN	nibrin
bta04218	615414	CCND2	cyclin D2
bta04218	516039	MAP2K3	mitogen-activated protein kinase kinase 3
bta04218	788127	RAD50	RAD50 double strand break repair protein
bta04218	524870	RBL1	RB transcriptional corepressor like 1
bta04218	338045	SQSTM1	sequestosome 1
bta04218	282307	PIK3R1	phosphoinositide-3-kinase regulatory subunit 1
bta04218	616801	TRAF3IP2	TRAF3 interacting protein 2
bta04218	280826	IL6	interleukin 6
bta04218	540803	MRAS	muscle RAS oncogene homolog
bta04218	618906	MAPK11	mitogen-activated protein kinase 11
bta04218	282261	IGFBP3	insulin like growth factor binding protein 3
bta04218	280991	AKT1	AKT serine/threonine kinase 1
bta04218	510434	MAP2K2	mitogen-activated protein kinase kinase 2
bta04218	535376	TGFBR2	transforming growth factor beta receptor 2
bta04218	282478	SLC25A4	solute carrier family 25 member 4
bta04218	512943	MAPK12	mitogen-activated protein kinase 12
bta04218	618104	LIN52	lin-52 DREAM MuvB core complex component
bta04218	618405	GADD45B	growth arrest and DNA damage inducible beta
bta04218	538866	HIPK3	homeodomain interacting protein kinase 3
bta04218	510158	HIPK2	homeodomain interacting protein kinase 2
bta04218	504531	PIK3CD	phosphatidylinositol-4,5-bisphosphate 3-kinase catalytic subunit delta
bta04218	281542	TP53	tumor protein p53
bta04218	280828	CXCL8	C-X-C motif chemokine ligand 8
bta04218	281668	CCNB2	cyclin B2
bta04218	518502	RAD1	RAD1 checkpoint DNA exonuclease
bta04218	281375	SERPINE1	serpin family E member 1
bta04218	100297344	CALM2	calmodulin 2
bta04218	538436	CCNE2	cyclin E2
bta04218	790867	PPP3CB	protein phosphatase 3 catalytic subunit beta
bta04218	513497	CDKN1A	cyclin dependent kinase inhibitor 1A
bta04218	327679	CCNB1	cyclin B1
bta04218	617095	CALM1	calmodulin 1
bta04218	509613	EIF4EBP1	eukaryotic translation initiation factor 4E binding protein 1
bta04218	282306	PIK3CA	phosphatidylinositol-4,5-bisphosphate 3-kinase catalytic subunit alpha
bta04218	508233	RELA	RELA proto-oncogene, NF-kB subunit
bta04218	524530	CCND1	cyclin D1
bta04218	541127	NFATC3	nuclear factor of activated T cells 3
bta04218	504647	RAD9A	RAD9 checkpoint clamp component A
bta04218	100139219	MTOR	mechanistic target of rapamycin kinase
bta04218	282480	SLC25A6	solute carrier family 25 member 6
bta04218	534069	TGFB2	transforming growth factor beta 2
bta04218	281667	CCNA2	cyclin A2
bta04218	521196	RAF1	Raf-1 proto-oncogene, serine/threonine kinase
bta04218	515125	SMAD3	SMAD family member 3
bta04218	533294	RBL2	RB transcriptional corepressor like 2
bta04218	504985	TSC2	TSC complex subunit 2
bta04218	533199	MAP2K1	mitogen-activated protein kinase kinase 1
bta04218	514642	TRPM7	transient receptor potential cation channel subfamily M member 7
bta04218	504939	GADD45G	growth arrest and DNA damage inducible gamma
bta04510	523755	ITGA11	integrin subunit alpha 11
bta04510	533199	MAP2K1	mitogen-activated protein kinase kinase 1
bta04510	615013	BAD	BCL2 associated agonist of cell death
bta04510	282121	VEGFB	vascular endothelial growth factor B
bta04510	521196	RAF1	Raf-1 proto-oncogene, serine/threonine kinase
bta04510	404122	ACTG1	actin gamma 1
bta04510	280794	FN1	fibronectin 1
bta04510	536286	ITGB8	integrin subunit beta 8
bta04510	532572	LAMC1	laminin subunit gamma 1
bta04510	524530	CCND1	cyclin D1
bta04510	524734	SHC4	SHC adaptor protein 4
bta04510	338037	MYLK	myosin light chain kinase
bta04510	530102	COL6A6	collagen type VI alpha 6 chain
bta04510	282306	PIK3CA	phosphatidylinositol-4,5-bisphosphate 3-kinase catalytic subunit alpha
bta04510	282879	HGF	hepatocyte growth factor
bta04510	505908	PDGFA	platelet derived growth factor subunit A
bta04510	282642	ITGB3	integrin subunit beta 3
bta04510	281499	SPP1	secreted phosphoprotein 1
bta04510	281872	ITGA2	integrin subunit alpha 2
bta04510	282188	COL1A2	collagen type I alpha 2 chain
bta04510	540664	TNC	tenascin C
bta04510	786565	DIAPH1	diaphanous related formin 1
bta04510	511043	LAMC2	laminin subunit gamma 2
bta04510	536051	BRAF	B-Raf proto-oncogene, serine/threonine kinase
bta04510	507196	SHC1	SHC adaptor protein 1
bta04510	619066	RAC3	Rac family small GTPase 3
bta04510	520454	RAPGEF1	Rap guanine nucleotide exchange factor 1
bta04510	504531	PIK3CD	phosphatidylinositol-4,5-bisphosphate 3-kinase catalytic subunit delta
bta04510	535043	ITGA6	integrin subunit alpha 6
bta04510	493642	CAV2	caveolin 2
bta04510	281020	BCL2	BCL2 apoptosis regulator
bta04510	540310	ARHGAP35	Rho GTPase activating protein 35
bta04510	508490	ITGA3	integrin subunit alpha 3
bta04510	788978	ARHGAP5	Rho GTPase activating protein 5
bta04510	529670	LAMA4	laminin subunit alpha 4
bta04510	281040	CAV1	caveolin 1
bta04510	527165	PDGFRB	platelet derived growth factor receptor beta
bta04510	281530	THBS1	thrombospondin 1
bta04510	280991	AKT1	AKT serine/threonine kinase 1
bta04510	518180	CRKL	CRK like proto-oncogene, adaptor protein
bta04510	506270	PTK2	protein tyrosine kinase 2
bta04510	280831	JUN	Jun proto-oncogene, AP-1 transcription factor subunit
bta04510	514902	VASP	vasodilator stimulated phosphoprotein
bta04510	535951	ITGA1	integrin subunit alpha 1
bta04510	613533	FLNB	filamin B
bta04510	282307	PIK3R1	phosphoinositide-3-kinase regulatory subunit 1
bta04510	520167	LAMB2	laminin, beta 2 (laminin S)
bta04510	520030	LAMB1	laminin subunit beta 1
bta04510	615430	PARVA	parvin alpha
bta04510	783470	TLN1	talin 1
bta04510	281873	ITGA5	integrin subunit alpha 5
bta04510	528252	TLN2	talin 2
bta04510	615414	CCND2	cyclin D2
bta04510	282654	TNXB	tenascin XB
bta04510	282187	COL1A1	collagen type I alpha 1 chain
bta04510	282122	VEGFC	vascular endothelial growth factor C
bta04510	521961	VAV3	vav guanine nucleotide exchange factor 3
bta04510	280894	PGF	placental growth factor
bta04510	539003	CTNNB1	catenin beta 1
bta04510	506953	ITGA7	integrin subunit alpha 7
bta04510	538829	PPP1CB	protein phosphatase 1 catalytic subunit beta
bta04510	517456	PXN	paxillin
bta04510	540106	PDGFB	platelet derived growth factor subunit B
bta04510	520039	RASGRF1	Ras protein specific guanine nucleotide releasing factor 1
bta04510	282308	PIK3R2	phosphoinositide-3-kinase regulatory subunit 2
bta04510	511602	COL4A5	collagen type IV alpha 5 chain
bta04510	786886	ELK1	ETS transcription factor ELK1
bta04510	785805	COL6A5	collagen type VI alpha 5 chain
bta04510	527550	BCAR1	BCAR1 scaffold protein, Cas family member
bta04510	100336873	LAMA3	laminin subunit alpha 3
bta04510	407107	COL4A4	collagen type IV alpha 4 chain
bta04510	522269	ACTN4	actinin alpha 4
bta04510	506387	LAMA1	laminin subunit alpha 1
bta04510	613787	PDGFC	platelet derived growth factor C
bta04510	280979	ACTB	actin beta
bta04510	281572	VEGFA	vascular endothelial growth factor A
bta04510	505709	ERBB2	erb-b2 receptor tyrosine kinase 2
bta04510	281876	ITGB1	integrin subunit beta 1
bta04510	783645	VCL	vinculin
bta04510	504323	THBS3	thrombospondin 3
bta04510	505942	COL9A2	collagen type IX alpha 2 chain
bta04510	506526	ITGA10	integrin subunit alpha 10
bta05205	282188	COL1A2	collagen type I alpha 2 chain
bta05205	536051	BRAF	B-Raf proto-oncogene, serine/threonine kinase
bta05205	508133	SDC4	syndecan 4
bta05205	281872	ITGA2	integrin subunit alpha 2
bta05205	282879	HGF	hepatocyte growth factor
bta05205	513497	CDKN1A	cyclin dependent kinase inhibitor 1A
bta05205	282642	ITGB3	integrin subunit beta 3
bta05205	782170	TWIST1	twist family bHLH transcription factor 1
bta05205	282162	CAMK2G	calcium/calmodulin dependent protein kinase II gamma
bta05205	282306	PIK3CA	phosphatidylinositol-4,5-bisphosphate 3-kinase catalytic subunit alpha
bta05205	524530	CCND1	cyclin D1
bta05205	100139219	MTOR	mechanistic target of rapamycin kinase
bta05205	539337	WNT10B	Wnt family member 10B
bta05205	530719	CAMK2A	calcium/calmodulin dependent protein kinase II alpha
bta05205	534069	TGFB2	transforming growth factor beta 2
bta05205	521196	RAF1	Raf-1 proto-oncogene, serine/threonine kinase
bta05205	404122	ACTG1	actin gamma 1
bta05205	280794	FN1	fibronectin 1
bta05205	533199	MAP2K1	mitogen-activated protein kinase kinase 1
bta05205	282307	PIK3R1	phosphoinositide-3-kinase regulatory subunit 1
bta05205	533590	PTPN11	protein tyrosine phosphatase non-receptor type 11
bta05205	281057	CD44	CD44 molecule
bta05205	540803	MRAS	muscle RAS oncogene homolog
bta05205	613533	FLNB	filamin B
bta05205	618906	MAPK11	mitogen-activated protein kinase 11
bta05205	280991	AKT1	AKT serine/threonine kinase 1
bta05205	506270	PTK2	protein tyrosine kinase 2
bta05205	281040	CAV1	caveolin 1
bta05205	317654	SLC9A1	solute carrier family 9 member A1
bta05205	510434	MAP2K2	mitogen-activated protein kinase kinase 2
bta05205	512943	MAPK12	mitogen-activated protein kinase 12
bta05205	281530	THBS1	thrombospondin 1
bta05205	505850	EIF4B	eukaryotic translation initiation factor 4B
bta05205	504531	PIK3CD	phosphatidylinositol-4,5-bisphosphate 3-kinase catalytic subunit delta
bta05205	281542	TP53	tumor protein p53
bta05205	493642	CAV2	caveolin 2
bta05205	280847	LUM	lumican
bta05205	538507	FZD2	frizzled class receptor 2
bta05205	408016	CASP3	caspase 3
bta05205	530005	WNT5A	Wnt family member 5A
bta05205	539003	CTNNB1	catenin beta 1
bta05205	511308	WNT9A	Wnt family member 9A
bta05205	538829	PPP1CB	protein phosphatase 1 catalytic subunit beta
bta05205	529759	SDC1	syndecan 1
bta05205	281108	CTSV	cathepsin V
bta05205	616913	FZD8	frizzled class receptor 8
bta05205	280760	DCN	decorin
bta05205	445416	FZD4	frizzled class receptor 4
bta05205	282187	COL1A1	collagen type I alpha 1 chain
bta05205	787914	RPS6	ribosomal protein S6
bta05205	508008	WNT5B	Wnt family member 5B
bta05205	521961	VAV3	vav guanine nucleotide exchange factor 3
bta05205	511203	ANK3	ankyrin 3
bta05205	281574	EZR	ezrin
bta05205	281536	TLR4	toll like receptor 4
bta05205	540426	MSN	moesin
bta05205	281873	ITGA5	integrin subunit alpha 5
bta05205	540085	GAB1	GRB2 associated binding protein 1
bta05205	444872	HSPG2	heparan sulfate proteoglycan 2
bta05205	445417	FZD1	frizzled class receptor 1
bta05205	506083	RPS6KB2	ribosomal protein S6 kinase B2
bta05205	538536	FZD5	frizzled class receptor 5
bta05205	539308	SMO	smoothened, frizzled class receptor
bta05205	281876	ITGB1	integrin subunit beta 1
bta05205	100337091	PLCG2	phospholipase C gamma 2
bta05205	280979	ACTB	actin beta
bta05205	281572	VEGFA	vascular endothelial growth factor A
bta05205	506939	CTTN	cortactin
bta05205	505709	ERBB2	erb-b2 receptor tyrosine kinase 2
bta05205	540168	DROSHA	drosha ribonuclease III
bta05205	281814	HIF1A	hypoxia inducible factor 1 subunit alpha
bta05205	786886	ELK1	ETS transcription factor ELK1
bta05205	522921	HBEGF	heparin binding EGF like growth factor
bta05205	616503	RRAS	RAS related
bta05205	535327	MAPK13	mitogen-activated protein kinase 13
bta05205	517456	PXN	paxillin
bta05205	540060	TWIST2	twist family bHLH transcription factor 2
bta05205	281879	ITPR3	inositol 1,4,5-trisphosphate receptor type 3
bta05205	282308	PIK3R2	phosphoinositide-3-kinase regulatory subunit 2
bta04144	786606	WIPF3	WAS/WASL interacting protein family member 3
bta04144	493642	CAV2	caveolin 2
bta04144	541288	CHMP7	charged multivesicular body protein 7
bta04144	512719	SH3GL1	SH3 domain containing GRB2 like 1, endophilin A2
bta04144	504698	TFRC	transferrin receptor
bta04144	327705	ASAP1	ArfGAP with SH3 domain, ankyrin repeat and PH domain 1
bta04144	783373	RAB10	RAB10, member RAS oncogene family
bta04144	523847	CHMP2A	charged multivesicular body protein 2A
bta04144	535566	VPS37B	VPS37B subunit of ESCRT-I
bta04144	281040	CAV1	caveolin 1
bta04144	535376	TGFBR2	transforming growth factor beta receptor 2
bta04144	538486	ACTR2	actin related protein 2
bta04144	536553	AP2S1	adaptor related protein complex 2 subunit sigma 1
bta04144	515216	AP2A2	adaptor related protein complex 2 subunit alpha 2
bta04144	281078	CLTA	clathrin light chain A
bta04144	514383	ZFYVE27	zinc finger FYVE-type containing 27
bta04144	538348	EHD2	EH domain containing 2
bta04144	505206	EHD4	EH domain containing 4
bta04144	514261	KIF5B	kinesin family member 5B
bta04144	508582	ACAP1	ArfGAP with coiled-coil, ankyrin repeat and PH domains 1
bta04144	317659	DNAJC6	DnaJ heat shock protein family (Hsp40) member C6
bta04144	522241	AGAP1	ArfGAP with GTPase domain, ankyrin repeat and PH domain 1
bta04144	100294979	ARF6	ADP ribosylation factor 6
bta04144	535992	RAB11FIP5	RAB11 family interacting protein 5
bta04144	326600	ARPC1B	actin related protein 2/3 complex subunit 1B
bta04144	508794	DNM1	dynamin 1
bta04144	616979	RAB31	RAB31, member RAS oncogene family
bta04144	281597	ACTR3	actin related protein 3
bta04144	281080	CLTC	clathrin heavy chain
bta04144	515125	SMAD3	SMAD family member 3
bta04144	505438	ARFGAP2	ADP ribosylation factor GTPase activating protein 2
bta04144	509221	DAB2	DAB adaptor protein 2
bta04144	511199	LDLRAP1	low density lipoprotein receptor adaptor protein 1
bta04144	518601	ARF4	ADP ribosylation factor 4
bta04144	510596	CHMP6	charged multivesicular body protein 6
bta04144	613421	ARPC5L	actin related protein 2/3 complex subunit 5 like
bta04144	281698	CLTB	clathrin light chain B
bta04144	511908	EHD1	EH domain containing 1
bta04144	618488	CYTH3	cytohesin 3
bta04144	514465	SMAP2	small ArfGAP2
bta04144	521541	IQSEC1	IQ motif and Sec7 domain ArfGEF 1
bta04144	528153	RUFY1	RUN and FYVE domain containing 1
bta04144	523124	PSD	pleckstrin and Sec7 domain containing
bta04144	514554	PLD1	phospholipase D1, phosphatidylcholine-specific
bta04144	512734	STAM	signal transducing adaptor molecule
bta04144	281801	GRK5	G protein-coupled receptor kinase 5
bta04144	520311	SH3GL3	SH3 domain containing GRB2 like 3, endophilin A3
bta04144	281769	FGFR3	fibroblast growth factor receptor 3
bta04144	505628	SNF8	SNF8 subunit of ESCRT-II
bta04144	539764	RAB5A	RAB5A, member RAS oncogene family
bta04144	534027	SPART	spartin
bta04144	614521	RAB35	RAB35, member RAS oncogene family
bta04144	539459	ARPC4	actin related protein 2/3 complex subunit 4
bta04144	510574	VPS26A	VPS26, retromer complex component A
bta04144	507722	CHMP3	charged multivesicular body protein 3
bta04144	281831	HSPA8	heat shock protein family A (Hsp70) member 8
bta04144	614321	VPS26B	VPS26, retromer complex component B
bta04144	281827	HSPA2	heat shock protein family A (Hsp70) member 2
bta04144	515444	ACAP3	ArfGAP with coiled-coil, ankyrin repeat and PH domains 3
bta04144	509769	SNX2	sorting nexin 2
bta04144	520739	SNX12	sorting nexin 12
bta04144	511647	RAB11FIP3	RAB11 family interacting protein 3
bta04144	613749	RAB5C	RAB5C, member RAS oncogene family
bta04144	508199	EPN1	epsin 1
bta04144	539835	HSPA6	heat shock protein family A (Hsp70) member 6
bta04144	539150	RAB5B	RAB5B, member RAS oncogene family
bta04144	617385	RAB22A	RAB22A, member RAS oncogene family
bta04144	614134	RNF41	ring finger protein 41
bta04144	508040	WASHC5	WASH complex subunit 5
bta04144	614345	ARPC5	actin related protein 2/3 complex subunit 5
bta04144	521864	VPS35	VPS35 retromer complex component
bta04144	100138545	PML	PML nuclear body scaffold
bta04144	613647	CHMP4A	charged multivesicular body protein 4A
bta04144	404193	FGFR2	fibroblast growth factor receptor 2
bta04144	540838	ARPC2	actin related protein 2/3 complex subunit 2
bta04144	789414	CHMP1A	charged multivesicular body protein 1A
bta04144	539295	ARFGEF2	ADP ribosylation factor guanine nucleotide exchange factor 2
bta04144	513740	FAM21A	family with sequence similarity 21, member A
bta04144	493728	CAPZA2	capping actin protein of muscle Z-line subunit alpha 2
bta04144	508431	ITCH	itchy E3 ubiquitin protein ligase
bta04144	534750	VPS25	vacuolar protein sorting 25 homolog
bta04144	510489	SH3KBP1	SH3 domain containing kinase binding protein 1
bta04144	531459	PSD3	pleckstrin and Sec7 domain containing 3
bta04144	532778	ARFGAP3	ADP ribosylation factor GTPase activating protein 3
bta04144	618785	VPS28	VPS28 subunit of ESCRT-I
bta04144	281022	ARFGEF1	ADP ribosylation factor guanine nucleotide exchange factor 1
bta04144	282382	TGFBR1	transforming growth factor beta receptor 1
bta04110	281061	CDK1	cyclin dependent kinase 1
bta04110	407223	HDAC2	histone deacetylase 2
bta04110	616369	CDKN2A	cyclin-dependent kinase inhibitor 2A
bta04110	540966	RAD21	RAD21 cohesin complex component
bta04110	505463	GADD45A	growth arrest and DNA damage inducible alpha
bta04110	282125	YWHAE	tyrosine 3-monooxygenase/tryptophan 5-monooxygenase activation protein epsilon
bta04110	506970	MCM5	minichromosome maintenance complex component 5
bta04110	286862	YWHAG	tyrosine 3-monooxygenase/tryptophan 5-monooxygenase activation protein gamma
bta04110	768311	YWHAQ	tyrosine 3-monooxygenase/tryptophan 5-monooxygenase activation protein theta
bta04110	518897	CHEK2	checkpoint kinase 2
bta04110	520428	CDC14B	cell division cycle 14B
bta04110	281302	MCM3	minichromosome maintenance complex component 3
bta04110	538957	TGFB3	transforming growth factor beta 3
bta04110	520188	CDC25A	cell division cycle 25A
bta04110	519217	CDK2	cyclin dependent kinase 2
bta04110	540322	WEE1	WEE1 G2 checkpoint kinase
bta04110	510120	MCM2	minichromosome maintenance complex component 2
bta04110	512915	ZBTB17	zinc finger and BTB domain containing 17
bta04110	615414	CCND2	cyclin D2
bta04110	615427	SKP1	S-phase kinase associated protein 1
bta04110	510244	CDKN2D	cyclin dependent kinase inhibitor 2D
bta04110	517812	MCM6	minichromosome maintenance complex component 6
bta04110	524870	RBL1	RB transcriptional corepressor like 1
bta04110	507122	CDC45	cell division cycle 45
bta04110	538238	PLK1	polo like kinase 1
bta04110	540876	ABL1	ABL proto-oncogene 1, non-receptor tyrosine kinase
bta04110	515499	PCNA	proliferating cell nuclear antigen
bta04110	512613	CDKN1B	cyclin dependent kinase inhibitor 1B
bta04110	515301	CDC6	cell division cycle 6
bta04110	537027	BUB1B	BUB1 mitotic checkpoint serine/threonine kinase B
bta04110	614342	CDC16	cell division cycle 16
bta04110	522613	PKMYT1	protein kinase, membrane associated tyrosine/threonine 1
bta04110	519409	ORC5	origin recognition complex subunit 5
bta04110	618405	GADD45B	growth arrest and DNA damage inducible beta
bta04110	504367	MCM4	minichromosome maintenance complex component 4
bta04110	519018	SKP2	S-phase kinase associated protein 2
bta04110	515376	CDC20	cell division cycle 20
bta04110	281542	TP53	tumor protein p53
bta04110	281668	CCNB2	cyclin B2
bta04110	505847	CDC25B	cell division cycle 25B
bta04110	538436	CCNE2	cyclin E2
bta04110	540248	SMAD4	SMAD family member 4
bta04110	513497	CDKN1A	cyclin dependent kinase inhibitor 1A
bta04110	327679	CCNB1	cyclin B1
bta04110	512651	CDC23	cell division cycle 23
bta04110	514777	BUB1	BUB1 mitotic checkpoint serine/threonine kinase
bta04110	524925	TTK	TTK protein kinase
bta04110	524530	CCND1	cyclin D1
bta04110	282126	YWHAH	tyrosine 3-monooxygenase/tryptophan 5-monooxygenase activation protein eta
bta04110	515462	CDK7	cyclin dependent kinase 7
bta04110	534069	TGFB2	transforming growth factor beta 2
bta04110	281667	CCNA2	cyclin A2
bta04110	539924	MCM7	minichromosome maintenance complex component 7
bta04110	515125	SMAD3	SMAD family member 3
bta04110	533294	RBL2	RB transcriptional corepressor like 2
bta04110	508043	PTTG1	PTTG1 regulator of sister chromatid separation, securin
bta04110	506740	ESPL1	extra spindle pole bodies like 1, separase
bta04110	504939	GADD45G	growth arrest and DNA damage inducible gamma
bta04142	282148	ATP6V0D1	ATPase H+ transporting V0 subunit d1
bta04142	281433	PSAP	prosaposin
bta04142	616331	AP1S2	adaptor related protein complex 1 subunit sigma 2
bta04142	404155	LAPTM4B	lysosomal protein transmembrane 4 beta
bta04142	515935	NAGPA	N-acetylglucosamine-1-phosphodiester alpha-N-acetylglucosaminidase
bta04142	512444	GNS	glucosamine (N-acetyl)-6-sulfatase
bta04142	536359	AP3S1	adaptor related protein complex 3 subunit sigma 1
bta04142	506192	AP1B1	adaptor related protein complex 1 subunit beta 1
bta04142	533177	SCARB2	scavenger receptor class B member 2
bta04142	517002	ACP5	acid phosphatase 5, tartrate resistant
bta04142	541272	IDS	iduronate 2-sulfatase
bta04142	281108	CTSV	cathepsin V
bta04142	513067	ARSG	arylsulfatase G
bta04142	515729	FUCA2	alpha-L-fucosidase 2
bta04142	538401	ARSB	arylsulfatase B
bta04142	533357	NAGA	alpha-N-acetylgalactosaminidase
bta04142	511591	SORT1	sortilin 1
bta04142	511345	AGA	aspartylglucosaminidase
bta04142	280815	NPC2	NPC intracellular cholesterol transporter 2
bta04142	508867	AP3S2	adaptor related protein complex 3 subunit sigma 2
bta04142	286768	ATP6V0A1	ATPase H+ transporting V0 subunit a1
bta04142	515809	GALNS	galactosamine (N-acetyl)-6-sulfatase
bta04142	505554	NEU1	neuraminidase 1
bta04142	100299651	ABCA2	ATP binding cassette subfamily A member 2
bta04142	505684	ATP6V0B	ATPase H+ transporting V0 subunit b
bta04142	509715	CTSF	cathepsin F
bta04142	281023	AP3D1	adaptor related protein complex 3 subunit delta 1
bta04142	281698	CLTB	clathrin light chain B
bta04142	281909	MANBA	mannosidase beta
bta04142	286772	NPC1	NPC intracellular cholesterol transporter 1
bta04142	515687	GUSB	glucuronidase beta
bta04142	327687	ATP6AP1	ATPase H+ transporting accessory protein 1
bta04142	404187	CTSZ	cathepsin Z
bta04142	281080	CLTC	clathrin heavy chain
bta04142	529186	CLN5	CLN5 intracellular trafficking protein
bta04142	505097	SMPD1	sphingomyelin phosphodiesterase 1
bta04142	789125	NAGLU	N-acetyl-alpha-glucosaminidase
bta04142	616804	CTSO	cathepsin O
bta04142	540693	AP1S3	adaptor related protein complex 1 subunit sigma 3
bta04142	518169	CTSA	cathepsin A
bta04142	281897	LAMP1	lysosomal associated membrane protein 1
bta04142	281291	M6PR	mannose-6-phosphate receptor, cation dependent
bta04142	352958	CTSC	cathepsin C
bta04142	767602	AP3B1	adaptor related protein complex 3 subunit beta 1
bta04142	509427	AP3M2	adaptor related protein complex 3 subunit mu 2
bta04142	327711	CTSS	cathepsin S
bta04142	505738	MCOLN1	mucolipin TRP cation channel 1
bta04142	535442	SGSH	N-sulfoglucosamine sulfohydrolase
bta04142	281078	CLTA	clathrin light chain A
bta04142	530164	SLC17A5	solute carrier family 17 member 5
bta04142	550622	ATP6V0C	ATPase H+ transporting V0 subunit c
bta04142	537087	GBA	glucosylceramidase beta
bta04142	281105	CTSB	cathepsin B
bta04142	768053	AP1S1	adaptor related protein complex 1 subunit sigma 1
bta04142	509610	GNPTAB	N-acetylglucosamine-1-phosphate transferase subunits alpha and beta
bta04142	504799	CLN3	CLN3 lysosomal/endosomal transmembrane protein, battenin
bta04142	515397	HYAL1	hyaluronidase 1
bta04142	510524	CTSH	cathepsin H
bta04142	532742	GLA	galactosidase alpha
bta04142	613527	CTNS	cystinosin, lysosomal cystine transporter
bta04015	282642	ITGB3	integrin subunit beta 3
bta04015	505908	PDGFA	platelet derived growth factor subunit A
bta04015	783484	MAGI1	membrane associated guanylate kinase, WW and PDZ domain containing 1
bta04015	614453	EFNA2	ephrin A2
bta04015	617095	CALM1	calmodulin 1
bta04015	282879	HGF	hepatocyte growth factor
bta04015	525482	ADCY9	adenylate cyclase 9
bta04015	282306	PIK3CA	phosphatidylinositol-4,5-bisphosphate 3-kinase catalytic subunit alpha
bta04015	536051	BRAF	B-Raf proto-oncogene, serine/threonine kinase
bta04015	100297344	CALM2	calmodulin 2
bta04015	507319	EFNA1	ephrin A1
bta04015	404122	ACTG1	actin gamma 1
bta04015	513895	PFN1	profilin 1
bta04015	282121	VEGFB	vascular endothelial growth factor B
bta04015	282637	CDH1	cadherin 1
bta04015	521196	RAF1	Raf-1 proto-oncogene, serine/threonine kinase
bta04015	533199	MAP2K1	mitogen-activated protein kinase kinase 1
bta04015	519566	RAPGEF5	Rap guanine nucleotide exchange factor 5
bta04015	282140	ANGPT1	angiopoietin 1
bta04015	281791	GNAI2	G protein subunit alpha i2
bta04015	100299449	CNR1	cannabinoid receptor 1
bta04015	538477	RALA	RAS like proto-oncogene A
bta04015	280991	AKT1	AKT serine/threonine kinase 1
bta04015	518180	CRKL	CRK like proto-oncogene, adaptor protein
bta04015	513723	RALGDS	ral guanine nucleotide dissociation stimulator
bta04015	512943	MAPK12	mitogen-activated protein kinase 12
bta04015	527165	PDGFRB	platelet derived growth factor receptor beta
bta04015	281530	THBS1	thrombospondin 1
bta04015	538447	PRKD3	protein kinase D3
bta04015	287026	PLCB1	phospholipase C beta 1
bta04015	510434	MAP2K2	mitogen-activated protein kinase kinase 2
bta04015	512798	EPHA2	EPH receptor A2
bta04015	281160	FGF1	fibroblast growth factor 1
bta04015	281885	KITLG	KIT ligand
bta04015	282307	PIK3R1	phosphoinositide-3-kinase regulatory subunit 1
bta04015	526585	F2R	coagulation factor II thrombin receptor
bta04015	618906	MAPK11	mitogen-activated protein kinase 11
bta04015	540803	MRAS	muscle RAS oncogene homolog
bta04015	514902	VASP	vasodilator stimulated phosphoprotein
bta04015	535383	RAPGEF3	Rap guanine nucleotide exchange factor 3
bta04015	281094	CSF1	colony stimulating factor 1
bta04015	533270	PRKD1	protein kinase D1
bta04015	504531	PIK3CD	phosphatidylinositol-4,5-bisphosphate 3-kinase catalytic subunit delta
bta04015	520454	RAPGEF1	Rap guanine nucleotide exchange factor 1
bta04015	326285	FGF10	fibroblast growth factor 10
bta04015	619066	RAC3	Rac family small GTPase 3
bta04015	280894	PGF	placental growth factor
bta04015	521961	VAV3	vav guanine nucleotide exchange factor 3
bta04015	282122	VEGFC	vascular endothelial growth factor C
bta04015	513625	SIPA1L3	signal induced proliferation associated 1 like 3
bta04015	535603	ADCY3	adenylate cyclase 3
bta04015	497011	ID1	inhibitor of DNA binding 1, HLH protein
bta04015	539003	CTNNB1	catenin beta 1
bta04015	783470	TLN1	talin 1
bta04015	533929	FGF18	fibroblast growth factor 18
bta04015	513095	ENAH	ENAH actin regulator
bta04015	404193	FGFR2	fibroblast growth factor receptor 2
bta04015	508234	SIPA1	signal-induced proliferation-associated 1
bta04015	789597	RAPGEF6	Rap guanine nucleotide exchange factor 6
bta04015	516039	MAP2K3	mitogen-activated protein kinase kinase 3
bta04015	528252	TLN2	talin 2
bta04015	281876	ITGB1	integrin subunit beta 1
bta04015	534227	DOCK4	dedicator of cytokinesis 4
bta04015	280979	ACTB	actin beta
bta04015	281572	VEGFA	vascular endothelial growth factor A
bta04015	527550	BCAR1	BCAR1 scaffold protein, Cas family member
bta04015	536654	GNAQ	G protein subunit alpha q
bta04015	100298336	MAGI2	membrane associated guanylate kinase, WW and PDZ domain containing 2
bta04015	540106	PDGFB	platelet derived growth factor subunit B
bta04015	281769	FGFR3	fibroblast growth factor receptor 3
bta04015	616885	FGF7	fibroblast growth factor 7
bta04015	282308	PIK3R2	phosphoinositide-3-kinase regulatory subunit 2
bta04015	512056	RASGRP2	RAS guanyl releasing protein 2
bta04015	616503	RRAS	RAS related
bta04015	535327	MAPK13	mitogen-activated protein kinase 13
bta04015	613787	PDGFC	platelet derived growth factor C
bta04015	535132	SIPA1L2	signal induced proliferation associated 1 like 2
bta04810	614345	ARPC5	actin related protein 2/3 complex subunit 5
bta04810	506526	ITGA10	integrin subunit alpha 10
bta04810	790873	PIKFYVE	phosphoinositide kinase, FYVE-type zinc finger containing
bta04810	783645	VCL	vinculin
bta04810	282386	TMSB4X	thymosin beta 4 X-linked
bta04810	525628	DIAPH3	diaphanous related formin 3
bta04810	281876	ITGB1	integrin subunit beta 1
bta04810	280979	ACTB	actin beta
bta04810	505886	IQGAP3	IQ motif containing GTPase activating protein 3
bta04810	613787	PDGFC	platelet derived growth factor C
bta04810	522269	ACTN4	actinin alpha 4
bta04810	539459	ARPC4	actin related protein 2/3 complex subunit 4
bta04810	539332	CFL2	cofilin 2
bta04810	513539	LIMK2	LIM domain kinase 2
bta04810	527550	BCAR1	BCAR1 scaffold protein, Cas family member
bta04810	517456	PXN	paxillin
bta04810	616503	RRAS	RAS related
bta04810	282308	PIK3R2	phosphoinositide-3-kinase regulatory subunit 2
bta04810	616885	FGF7	fibroblast growth factor 7
bta04810	540106	PDGFB	platelet derived growth factor subunit B
bta04810	281769	FGFR3	fibroblast growth factor receptor 3
bta04810	507837	BAIAP2	BAR/IMD domain containing adaptor protein 2
bta04810	101907541	NCKAP1	NCK associated protein 1
bta04810	538829	PPP1CB	protein phosphatase 1 catalytic subunit beta
bta04810	506953	ITGA7	integrin subunit alpha 7
bta04810	613811	CXCL12	C-X-C motif chemokine ligand 12
bta04810	521961	VAV3	vav guanine nucleotide exchange factor 3
bta04810	404193	FGFR2	fibroblast growth factor receptor 2
bta04810	513095	ENAH	ENAH actin regulator
bta04810	540838	ARPC2	actin related protein 2/3 complex subunit 2
bta04810	281574	EZR	ezrin
bta04810	540426	MSN	moesin
bta04810	281873	ITGA5	integrin subunit alpha 5
bta04810	533929	FGF18	fibroblast growth factor 18
bta04810	533233	APC	APC regulator of WNT signaling pathway
bta04810	282307	PIK3R1	phosphoinositide-3-kinase regulatory subunit 1
bta04810	281160	FGF1	fibroblast growth factor 1
bta04810	540803	MRAS	muscle RAS oncogene homolog
bta04810	535951	ITGA1	integrin subunit alpha 1
bta04810	526585	F2R	coagulation factor II thrombin receptor
bta04810	518180	CRKL	CRK like proto-oncogene, adaptor protein
bta04810	538486	ACTR2	actin related protein 2
bta04810	506270	PTK2	protein tyrosine kinase 2
bta04810	510434	MAP2K2	mitogen-activated protein kinase kinase 2
bta04810	317654	SLC9A1	solute carrier family 9 member A1
bta04810	527165	PDGFRB	platelet derived growth factor receptor beta
bta04810	531488	WASF1	WASP family member 1
bta04810	508490	ITGA3	integrin subunit alpha 3
bta04810	537711	ABI2	abl interactor 2
bta04810	100140050	ITGAE	integrin subunit alpha E
bta04810	535043	ITGA6	integrin subunit alpha 6
bta04810	504531	PIK3CD	phosphatidylinositol-4,5-bisphosphate 3-kinase catalytic subunit delta
bta04810	540310	ARHGAP35	Rho GTPase activating protein 35
bta04810	535077	GSN	gelsolin
bta04810	619066	RAC3	Rac family small GTPase 3
bta04810	326285	FGF10	fibroblast growth factor 10
bta04810	786565	DIAPH1	diaphanous related formin 1
bta04810	536051	BRAF	B-Raf proto-oncogene, serine/threonine kinase
bta04810	512652	SSH2	slingshot protein phosphatase 2
bta04810	281872	ITGA2	integrin subunit alpha 2
bta04810	282642	ITGB3	integrin subunit beta 3
bta04810	533823	ARHGEF6	Rac/Cdc42 guanine nucleotide exchange factor 6
bta04810	505908	PDGFA	platelet derived growth factor subunit A
bta04810	282306	PIK3CA	phosphatidylinositol-4,5-bisphosphate 3-kinase catalytic subunit alpha
bta04810	338037	MYLK	myosin light chain kinase
bta04810	613421	ARPC5L	actin related protein 2/3 complex subunit 5 like
bta04810	317655	MYH10	myosin heavy chain 10
bta04810	521196	RAF1	Raf-1 proto-oncogene, serine/threonine kinase
bta04810	513895	PFN1	profilin 1
bta04810	536286	ITGB8	integrin subunit beta 8
bta04810	532119	BDKRB1	bradykinin receptor B1
bta04810	281597	ACTR3	actin related protein 3
bta04810	404122	ACTG1	actin gamma 1
bta04810	280794	FN1	fibronectin 1
bta04810	326600	ARPC1B	actin related protein 2/3 complex subunit 1B
bta04810	523755	ITGA11	integrin subunit alpha 11
bta04810	533199	MAP2K1	mitogen-activated protein kinase kinase 1
bta05169	512456	PSMD7	proteasome 26S subunit, non-ATPase 7
bta05169	281542	TP53	tumor protein p53
bta05169	281020	BCL2	BCL2 apoptosis regulator
bta05169	524959	TAP1	transporter 1, ATP binding cassette subfamily B member
bta05169	526392	NFKB2	nuclear factor kappa B subunit 2
bta05169	504531	PIK3CD	phosphatidylinositol-4,5-bisphosphate 3-kinase catalytic subunit delta
bta05169	519018	SKP2	S-phase kinase associated protein 2
bta05169	508105	TNFAIP3	TNF alpha induced protein 3
bta05169	347700	EIF2AK2	eukaryotic translation initiation factor 2 alpha kinase 2
bta05169	508448	PSMC3	proteasome 26S subunit, ATPase 3
bta05169	504727	RIPK1	receptor interacting serine/threonine kinase 1
bta05169	618405	GADD45B	growth arrest and DNA damage inducible beta
bta05169	100125591	IRF7	interferon regulatory factor 7
bta05169	519729	ADRM1	ADRM1 26S proteasome ubiquitin receptor
bta05169	537201	JAK1	Janus kinase 1
bta05169	512943	MAPK12	mitogen-activated protein kinase 12
bta05169	533953	IRAK1	interleukin 1 receptor associated kinase 1
bta05169	280991	AKT1	AKT serine/threonine kinase 1
bta05169	538625	PSMD6	proteasome 26S subunit, non-ATPase 6
bta05169	512613	CDKN1B	cyclin dependent kinase inhibitor 1B
bta05169	510373	BID	BH3 interacting domain death agonist
bta05169	618906	MAPK11	mitogen-activated protein kinase 11
bta05169	280831	JUN	Jun proto-oncogene, AP-1 transcription factor subunit
bta05169	281057	CD44	CD44 molecule
bta05169	518504	SIN3A	SIN3 transcription regulator family member A
bta05169	280826	IL6	interleukin 6
bta05169	282307	PIK3R1	phosphoinositide-3-kinase regulatory subunit 1
bta05169	504939	GADD45G	growth arrest and DNA damage inducible gamma
bta05169	509855	IRF9	interferon regulatory factor 9
bta05169	282015	PSMC5	proteasome 26S subunit, ATPase 5
bta05169	281036	CALR	calreticulin
bta05169	282016	PSMD4	proteasome 26S subunit ubiquitin receptor, non-ATPase 4
bta05169	281667	CCNA2	cyclin A2
bta05169	511803	PSMD1	proteasome 26S subunit, non-ATPase 1
bta05169	524530	CCND1	cyclin D1
bta05169	508233	RELA	RELA proto-oncogene, NF-kB subunit
bta05169	282306	PIK3CA	phosphatidylinositol-4,5-bisphosphate 3-kinase catalytic subunit alpha
bta05169	493720	FADD	Fas associated via death domain
bta05169	508367	MAP3K14	mitogen-activated protein kinase kinase kinase 14
bta05169	513497	CDKN1A	cyclin dependent kinase inhibitor 1A
bta05169	538436	CCNE2	cyclin E2
bta05169	513525	PSMD13	proteasome 26S subunit, non-ATPase 13
bta05169	539784	PSMD2	proteasome 26S subunit ubiquitin receptor, non-ATPase 2
bta05169	535683	PSMD14	proteasome 26S subunit, non-ATPase 14
bta05169	282308	PIK3R2	phosphoinositide-3-kinase regulatory subunit 2
bta05169	530186	PSMC2	proteasome 26S subunit, ATPase 2
bta05169	535327	MAPK13	mitogen-activated protein kinase 13
bta05169	537782	APAF1	apoptotic peptidase activating factor 1
bta05169	533692	IRAK4	interleukin 1 receptor associated kinase 4
bta05169	516979	IRF3	interferon regulatory factor 3
bta05169	767981	SEM1	SEM1 26S proteasome subunit
bta05169	529146	MAP3K7	mitogen-activated protein kinase kinase kinase 7
bta05169	506238	PSMC1	proteasome 26S subunit, ATPase 1
bta05169	505463	GADD45A	growth arrest and DNA damage inducible alpha
bta05169	513461	PSMD11	proteasome 26S subunit, non-ATPase 11
bta05169	100337091	PLCG2	phospholipase C gamma 2
bta05169	407223	HDAC2	histone deacetylase 2
bta05169	506727	NFKBIE	NFKB inhibitor epsilon
bta05169	280729	B2M	beta-2-microglobulin
bta05169	504937	PSMD3	proteasome 26S subunit, non-ATPase 3
bta05169	540203	TAB2	TGF-beta activated kinase 1 (MAP3K7) binding protein 2
bta05169	539547	HES1	hes family bHLH transcription factor 1
bta05169	514090	BAK1	BCL2 antagonist/killer 1
bta05169	538549	NCOR2	nuclear receptor corepressor 2
bta05169	516039	MAP2K3	mitogen-activated protein kinase kinase 3
bta05169	507234	TRAF5	TNF receptor associated factor 5
bta05169	615414	CCND2	cyclin D2
bta05169	512891	PSMD8	proteasome 26S subunit, non-ATPase 8
bta05169	510029	PSMC4	proteasome 26S subunit, ATPase 4
bta05169	281803	PDIA3	protein disulfide isomerase family A member 3
bta05169	281056	CD247	CD247 molecule
bta05169	326578	SNW1	SNW domain containing 1
bta05169	504335	TAPBP	TAP binding protein
bta05169	782186	CD58	CD58 molecule
bta05169	541218	POLK	DNA polymerase kappa
bta05169	519217	CDK2	cyclin dependent kinase 2
bta05169	510814	STAT1	signal transducer and activator of transcription 1
bta05169	281586	TAP2	transporter 2, ATP binding cassette subfamily B member
bta05169	408016	CASP3	caspase 3
bta05166	540109	CRTC3	CREB regulated transcription coactivator 3
bta05166	510465	CRTC1	CREB regulated transcription coactivator 1
bta05166	100297981	EGR2	early growth response 2
bta05166	614382	NFYB	nuclear transcription factor Y subunit beta
bta05166	280729	B2M	beta-2-microglobulin
bta05166	282120	VDAC2	voltage dependent anion channel 2
bta05166	616369	CDKN2A	cyclin-dependent kinase inhibitor 2A
bta05166	615030	IL15RA	interleukin 15 receptor subunit alpha
bta05166	514420	KAT2A	lysine acetyltransferase 2A
bta05166	539369	NRP1	neuropilin 1
bta05166	518897	CHEK2	checkpoint kinase 2
bta05166	515640	IL1R1	interleukin 1 receptor type 1
bta05166	282308	PIK3R2	phosphoinositide-3-kinase regulatory subunit 2
bta05166	538957	TGFB3	transforming growth factor beta 3
bta05166	509107	ATF4	activating transcription factor 4
[truncated: 7,844 more rows]

## Sheet: GO-BP
Gene Set Name	Description	Genes in Gene Set	Genes in Overlap	P-value	FDR
GO:0045893	positive regulation of transcription, DNA-templated	107	52	2.45516e-26	4.76301e-24
GO:0045944	positive regulation of transcription by RNA polymerase II	153	62	1.10908e-25	1.0758e-23
GO:0006915	apoptotic process	148	59	4.49724e-24	2.90822e-22
GO:0051301	cell division	116	50	1.94426e-22	9.42966e-21
GO:0018215	protein phosphopantetheinylation	109	46	2.63357e-20	1.02183e-18
GO:0006412	translation	82	37	8.39694e-18	2.71501e-16
GO:0006468	protein phosphorylation	68	33	3.15447e-17	7.64959e-16
GO:0043547	positive regulation of GTPase activity	60	31	2.82629e-17	7.64959e-16
GO:0007049	cell cycle	103	41	3.67225e-17	7.91574e-16
GO:0043065	positive regulation of apoptotic process	55	29	1.44866e-16	2.81039e-15
GO:0000122	negative regulation of transcription by RNA polymerase II	94	38	2.79125e-16	4.92275e-15
GO:0015031	protein transport	134	46	3.98658e-16	6.44498e-15
GO:0043066	negative regulation of apoptotic process	83	34	6.29318e-15	9.39137e-14
GO:0030335	positive regulation of cell migration	38	22	4.91919e-14	6.81659e-13
GO:0050821	protein stabilization	47	24	1.51941e-13	1.88964e-12
GO:0050790	regulation of catalytic activity	55	26	1.55846e-13	1.88964e-12
GO:0006281	DNA repair	67	28	8.299e-13	9.47062e-12
GO:0016055	Wnt signaling pathway	44	22	2.7242e-12	2.93608e-11
GO:0007155	cell adhesion	71	28	4.56019e-12	4.65619e-11
GO:0008285	negative regulation of cell population proliferation	54	24	7.06423e-12	6.85231e-11
GO:0008284	positive regulation of cell population proliferation	64	26	1.17422e-11	1.08475e-10
GO:0016567	protein ubiquitination	104	34	1.24976e-11	1.10206e-10
GO:0045892	negative regulation of transcription, DNA-templated	69	26	8.75766e-11	7.07911e-10
GO:0060271	cilium assembly	38	19	8.41848e-11	7.07911e-10
GO:0006886	intracellular protein transport	47	21	1.27648e-10	9.90545e-10
GO:0008283	cell population proliferation	28	16	1.89043e-10	1.41055e-09
GO:0001525	angiogenesis	49	21	3.32443e-10	2.38866e-09
GO:0032508	DNA duplex unwinding	22	14	3.53291e-10	2.4478e-09
GO:0001701	in utero embryonic development	33	17	4.55231e-10	3.04534e-09
GO:0006511	ubiquitin-dependent protein catabolic process	46	20	6.40229e-10	4.14015e-09
GO:0010628	positive regulation of gene expression	56	22	9.52329e-10	5.95973e-09
GO:0008203	cholesterol metabolic process	17	12	1.10894e-09	6.72294e-09
GO:0032543	mitochondrial translation	28	15	2.38788e-09	1.40379e-08
GO:0035556	intracellular signal transduction	36	17	2.57602e-09	1.46985e-08
GO:0030154	cell differentiation	113	32	2.95365e-09	1.63717e-08
GO:0007165	signal transduction	116	32	5.99868e-09	3.23262e-08
GO:0006397	mRNA processing	50	19	2.50643e-08	1.31418e-07
GO:0032981	mitochondrial respiratory chain complex I assembly	35	15	1.1245e-07	5.74089e-07
GO:0034976	response to endoplasmic reticulum stress	27	13	1.47554e-07	7.33986e-07
GO:0006469	negative regulation of protein kinase activity	16	10	1.6482e-07	7.99379e-07
GO:0006979	response to oxidative stress	25	12	4.68253e-07	2.21564e-06
GO:0007275	multicellular organism development	76	22	5.47166e-07	2.52738e-06
GO:0034599	cellular response to oxidative stress	22	11	8.46515e-07	3.73236e-06
GO:0043410	positive regulation of MAPK cascade	22	11	8.46515e-07	3.73236e-06
GO:0006357	regulation of transcription by RNA polymerase II	40	15	9.01254e-07	3.80094e-06
GO:0006897	endocytosis	40	15	9.01254e-07	3.80094e-06
GO:0031397	negative regulation of protein ubiquitination	15	9	1.15376e-06	4.66311e-06
GO:0031647	regulation of protein stability	15	9	1.15376e-06	4.66311e-06
GO:0032088	negative regulation of NF-kappaB transcription factor activity	19	10	1.47492e-06	5.7227e-06
GO:0008217	regulation of blood pressure	19	10	1.47492e-06	5.7227e-06
GO:0008380	RNA splicing	37	14	1.83408e-06	6.97669e-06
GO:0006974	cellular response to DNA damage stimulus	64	19	2.09456e-06	7.81432e-06
GO:0006364	rRNA processing	24	11	2.52622e-06	8.59802e-06
GO:0006914	autophagy	33	13	2.51318e-06	8.59802e-06
GO:0007507	heart development	24	11	2.52622e-06	8.59802e-06
GO:0070374	positive regulation of ERK1 and ERK2 cascade	33	13	2.51318e-06	8.59802e-06
GO:0030199	collagen fibril organization	16	9	2.42525e-06	8.59802e-06
GO:0016310	phosphorylation	34	13	3.73342e-06	1.24876e-05
GO:0007420	brain development	21	10	4.75614e-06	1.46459e-05
GO:0051726	regulation of cell cycle	17	9	4.73992e-06	1.46459e-05
GO:0030307	positive regulation of cell growth	17	9	4.73992e-06	1.46459e-05
GO:0006099	tricarboxylic acid cycle	17	9	4.73992e-06	1.46459e-05
GO:0042572	retinol metabolic process	21	10	4.75614e-06	1.46459e-05
GO:0045087	innate immune response	105	25	5.05369e-06	1.5319e-05
GO:0006486	protein glycosylation	26	11	6.59626e-06	1.96873e-05
GO:0043154	negative regulation of cysteine-type endopeptidase activity involved in apoptotic process	18	9	8.71953e-06	2.52476e-05
GO:0007219	Notch signaling pathway	18	9	8.71953e-06	2.52476e-05
GO:1902600	proton transmembrane transport	43	14	1.40183e-05	3.99933e-05
GO:0032092	positive regulation of protein binding	19	9	1.52397e-05	4.28478e-05
GO:0001666	response to hypoxia	28	11	1.54702e-05	4.28745e-05
GO:0006355	regulation of transcription, DNA-templated	49	15	1.61694e-05	4.41813e-05
GO:0051897	positive regulation of protein kinase B signaling	24	10	2.05375e-05	5.5337e-05
GO:0001934	positive regulation of protein phosphorylation	29	11	2.28974e-05	6.08506e-05
GO:0051289	protein homotetramerization	20	9	2.54906e-05	6.68267e-05
GO:0001516	prostaglandin biosynthetic process	16	8	2.82014e-05	7.10529e-05
GO:0006633	fatty acid biosynthetic process	16	8	2.82014e-05	7.10529e-05
GO:0006310	DNA recombination	16	8	2.82014e-05	7.10529e-05
GO:0098869	cellular oxidant detoxification	40	13	2.89173e-05	7.19226e-05
GO:0045766	positive regulation of angiogenesis	25	10	3.1467e-05	7.72733e-05
GO:0008150	biological_process	21	9	4.10414e-05	9.95255e-05
GO:0016579	protein deubiquitination	17	8	4.9056e-05	0.000117492
GO:0006954	inflammatory response	72	18	5.12775e-05	0.000121315
GO:0071222	cellular response to lipopolysaccharide	22	9	6.39065e-05	0.000149372
GO:0051260	protein homooligomerization	32	11	6.6235e-05	0.000151172
GO:0005975	carbohydrate metabolic process	32	11	6.6235e-05	0.000151172
GO:0006366	transcription by RNA polymerase II	27	10	6.86503e-05	0.000154862
GO:0042632	cholesterol homeostasis	18	8	8.13252e-05	0.000177271
GO:0000165	MAPK cascade	18	8	8.13252e-05	0.000177271
GO:0040008	regulation of growth	18	8	8.13252e-05	0.000177271
GO:0055085	transmembrane transport	44	13	8.85828e-05	0.000190945
GO:0072659	protein localization to plasma membrane	23	9	9.6611e-05	0.000205962
GO:0007186	G protein-coupled receptor signaling pathway	51	14	0.00011616	0.000244946
GO:0051092	positive regulation of NF-kappaB transcription factor activity	29	10	0.000137825	0.000287506
GO:0007596	blood coagulation	24	9	0.000142255	0.00029359
GO:0045444	fat cell differentiation	15	7	0.000158809	0.000317617
GO:0070373	negative regulation of ERK1 and ERK2 cascade	15	7	0.000158809	0.000317617
GO:0006635	fatty acid beta-oxidation	15	7	0.000158809	0.000317617
GO:0006508	proteolysis	105	22	0.000192361	0.000380796
GO:0051781	positive regulation of cell division	20	8	0.000198652	0.000385385
GO:0006325	chromatin organization	20	8	0.000198652	0.000385385
GO:0030308	negative regulation of cell growth	25	9	0.000204573	0.000389091
GO:0006260	DNA replication	25	9	0.000204573	0.000389091
GO:0090263	positive regulation of canonical Wnt signaling pathway	16	7	0.000260392	0.000485731
GO:0006096	glycolytic process	16	7	0.000260392	0.000485731
GO:0051865	protein autoubiquitination	21	8	0.000295643	0.000546236
GO:0006417	regulation of translation	17	7	0.000408327	0.000740331
GO:0032869	cellular response to insulin stimulus	17	7	0.000408327	0.000740331
GO:0006006	glucose metabolic process	18	7	0.000616419	0.00106773
GO:0043524	negative regulation of neuron apoptotic process	23	8	0.000604839	0.00106773
GO:0000398	mRNA splicing, via spliceosome	40	11	0.000604666	0.00106773
GO:0018105	peptidyl-serine phosphorylation	18	7	0.000616419	0.00106773
GO:0016192	vesicle-mediated transport	18	7	0.000616419	0.00106773
GO:0050918	positive chemotaxis	24	8	0.000836131	0.00143548
GO:0007005	mitochondrion organization	19	7	0.000900521	0.00146808
GO:0048511	rhythmic process	19	7	0.000900521	0.00146808
GO:0007050	cell cycle arrest	19	7	0.000900521	0.00146808
GO:1902476	chloride transmembrane transport	19	7	0.000900521	0.00146808
GO:0051091	positive regulation of DNA-binding transcription factor activity	19	7	0.000900521	0.00146808
GO:0070936	protein K48-linked ubiquitination	19	7	0.000900521	0.00146808
GO:0000413	protein peptidyl-prolyl isomerization	25	8	0.00113334	0.00183222
GO:0008360	regulation of cell shape	31	9	0.00122947	0.00197121
GO:0006334	nucleosome assembly	15	6	0.00128961	0.00205069
GO:0010468	regulation of gene expression	21	7	0.00176985	0.00272501
GO:0006457	protein folding	21	7	0.00176985	0.00272501
GO:0071805	potassium ion transmembrane transport	21	7	0.00176985	0.00272501
GO:0006413	translational initiation	21	7	0.00176985	0.00272501
GO:0046718	viral entry into host cell	16	6	0.00190714	0.0028905
GO:0007179	transforming growth factor beta receptor signaling pathway	16	6	0.00190714	0.0028905
GO:0033138	positive regulation of peptidyl-serine phosphorylation	22	7	0.00239602	0.0035756
GO:0031175	neuron projection development	22	7	0.00239602	0.0035756
GO:0016477	cell migration	28	8	0.00255199	0.00377928
GO:0001649	osteoblast differentiation	17	6	0.00272467	0.00394467
GO:0007059	chromosome segregation	17	6	0.00272467	0.00394467
GO:0030036	actin cytoskeleton organization	17	6	0.00272467	0.00394467
GO:0051607	defense response to virus	62	13	0.00307244	0.00441521
GO:0042127	regulation of cell population proliferation	23	7	0.00317967	0.0045357
GO:0090305	nucleic acid phosphodiester bond hydrolysis	29	8	0.00324979	0.00460189
GO:0035335	peptidyl-tyrosine dephosphorylation	18	6	0.0037788	0.005274
GO:0043161	proteasome-mediated ubiquitin-dependent protein catabolic process	18	6	0.0037788	0.005274
GO:0042981	regulation of apoptotic process	24	7	0.00414465	0.0057433
GO:0043123	positive regulation of I-kappaB kinase/NF-kappaB signaling	25	7	0.00531572	0.00731382
GO:0045600	positive regulation of fat cell differentiation	15	5	0.00816241	0.0108459
GO:0006814	sodium ion transport	15	5	0.00816241	0.0108459
GO:0006816	calcium ion transport	15	5	0.00816241	0.0108459
GO:0006890	retrograde vesicle-mediated transport, Golgi to endoplasmic reticulum	15	5	0.00816241	0.0108459
GO:0030433	ubiquitin-dependent ERAD pathway	15	5	0.00816241	0.0108459
GO:0007605	sensory perception of sound	27	7	0.00837759	0.0110561
GO:0006470	protein dephosphorylation	21	6	0.00873945	0.0114558
GO:0016311	dephosphorylation	22	6	0.0111182	0.0144761
GO:0007283	spermatogenesis	72	13	0.0124476	0.0160989
GO:0002250	adaptive immune response	29	7	0.0125689	0.0161481
GO:0051028	mRNA transport	23	6	0.0139201	0.0175357
GO:0042593	glucose homeostasis	23	6	0.0139201	0.0175357
GO:0090502	RNA phosphodiester bond hydrolysis, endonucleolytic	23	6	0.0139201	0.0175357
GO:0032755	positive regulation of interleukin-6 production	17	5	0.0144562	0.01775
GO:0070588	calcium ion transmembrane transport	17	5	0.0144562	0.01775
GO:0046777	protein autophosphorylation	17	5	0.0144562	0.01775
GO:0071356	cellular response to tumor necrosis factor	17	5	0.0144562	0.01775
GO:0007601	visual perception	58	11	0.0175302	0.021389
GO:0016042	lipid catabolic process	31	7	0.0180872	0.0219308
GO:0016525	negative regulation of angiogenesis	18	5	0.0185628	0.0223676
GO:0022900	electron transport chain	25	6	0.0209247	0.0249043
GO:0010629	negative regulation of gene expression	25	6	0.0209247	0.0249043
GO:0032259	methylation	20	5	0.0289085	0.0339894
GO:0006909	phagocytosis	20	5	0.0289085	0.0339894
GO:0000184	nuclear-transcribed mRNA catabolic process, nonsense-mediated decay	15	4	0.0398007	0.045154
GO:0006958	complement activation, classical pathway	15	4	0.0398007	0.045154
GO:0007517	muscle organ development	15	4	0.0398007	0.045154
GO:0009617	response to bacterium	15	4	0.0398007	0.045154
GO:0042752	regulation of circadian rhythm	15	4	0.0398007	0.045154
GO:0006631	fatty acid metabolic process	15	4	0.0398007	0.045154
GO:0050728	negative regulation of inflammatory response	22	5	0.0422975	0.0477077

## Sheet: GO-BP_detail
Gene Set Name	Gene Id	Gene Symbol	Description
GO:0045893	539519	MLLT11	MLLT11 transcription factor 7 cofactor
GO:0045893	505025	ID2	inhibitor of DNA binding 2
GO:0045893	613462	ARL2BP	ADP ribosylation factor like GTPase 2 binding protein
GO:0045893	282707	CEP290	centrosomal protein 290
GO:0045893	616148	LBH	LBH regulator of WNT signaling pathway
GO:0045893	281814	HIF1A	hypoxia inducible factor 1 subunit alpha
GO:0045893	522269	ACTN4	actinin alpha 4
GO:0045893	531022	TRIM38	tripartite motif containing 38
GO:0045893	614028	NPM1	nucleophosmin 1
GO:0045893	353120	BRCA1	BRCA1 DNA repair associated
GO:0045893	509107	ATF4	activating transcription factor 4
GO:0045893	399560	MRPL12	mitochondrial ribosomal protein L12
GO:0045893	407216	BMP4	bone morphogenetic protein 4
GO:0045893	534273	USP21	ubiquitin specific peptidase 21
GO:0045893	282382	TGFBR1	transforming growth factor beta receptor 1
GO:0045893	539291	MYCBP	MYC binding protein
GO:0045893	519217	CDK2	cyclin dependent kinase 2
GO:0045893	539003	CTNNB1	catenin beta 1
GO:0045893	508343	JMJD6	jumonji domain containing 6, arginine demethylase and lysine hydroxylase
GO:0045893	783538	ARID5B	AT-rich interaction domain 5B
GO:0045893	282187	COL1A1	collagen type I alpha 1 chain
GO:0045893	782816	TRIM44	tripartite motif containing 44
GO:0045893	281713	CREB1	cAMP responsive element binding protein 1
GO:0045893	613751	GPBP1	GC-rich promoter binding protein 1
GO:0045893	280831	JUN	Jun proto-oncogene, AP-1 transcription factor subunit
GO:0045893	526585	F2R	coagulation factor II thrombin receptor
GO:0045893	508692	OSR2	odd-skipped related transciption factor 2
GO:0045893	281945	NR2F2	nuclear receptor subfamily 2 group F member 2
GO:0045893	407125	EGR1	early growth response 1
GO:0045893	519992	USP16	ubiquitin specific peptidase 16
GO:0045893	509080	PKN1	protein kinase N1
GO:0045893	281630	APEX1	apurinic/apyrimidinic endodeoxyribonuclease 1
GO:0045893	507897	DNAJC2	DnaJ heat shock protein family (Hsp40) member C2
GO:0045893	614069	ENY2	ENY2 transcription and export complex 2 subunit
GO:0045893	510376	ANKRD1	ankyrin repeat domain 1
GO:0045893	777788	DDIT3	DNA damage inducible transcript 3
GO:0045893	617943	PCID2	PCI domain containing 2
GO:0045893	520800	TFE3	transcription factor binding to IGHM enhancer 3
GO:0045893	506097	NFIL3	nuclear factor, interleukin 3 regulated
GO:0045893	512854	MTA3	metastasis associated 1 family member 3
GO:0045893	768207	SS18L1	SS18L1 subunit of BAF chromatin remodeling complex
GO:0045893	511596	NDP	norrin cystine knot growth factor NDP
GO:0045893	515380	EDF1	endothelial differentiation related factor 1
GO:0045893	282126	YWHAH	tyrosine 3-monooxygenase/tryptophan 5-monooxygenase activation protein eta
GO:0045893	281867	INHBA	inhibin subunit beta A
GO:0045893	536537	CNOT9	CCR4-NOT transcription complex subunit 9
GO:0045893	281402	PIM1	Pim-1 proto-oncogene, serine/threonine kinase
GO:0045893	530409	PHB	prohibitin
GO:0045893	535190	TRIM13	tripartite motif containing 13
GO:0045893	505401	TADA2A	transcriptional adaptor 2A
GO:0045893	614675	PDLIM1	PDZ and LIM domain 1
GO:0045893	513983	SCAND1	SCAN domain containing 1
GO:0045944	497024	NFE2L2	nuclear factor, erythroid 2 like 2
GO:0045944	281713	CREB1	cAMP responsive element binding protein 1
GO:0045944	539547	HES1	hes family bHLH transcription factor 1
GO:0045944	505702	GTF2F1	general transcription factor IIF subunit 1
GO:0045944	533661	STING1	stimulator of interferon response cGAMP interactor 1
GO:0045944	515219	MAFG	MAF bZIP transcription factor G
GO:0045944	508138	THAP3	THAP domain containing 3
GO:0045944	540245	NR4A2	nuclear receptor subfamily 4 group A member 2
GO:0045944	617914	MAFF	MAF bZIP transcription factor F
GO:0045944	539003	CTNNB1	catenin beta 1
GO:0045944	282527	TNFRSF1A	TNF receptor superfamily member 1A
GO:0045944	508343	JMJD6	jumonji domain containing 6, arginine demethylase and lysine hydroxylase
GO:0045944	535470	PIN1	peptidylprolyl cis/trans isomerase, NIMA-interacting 1
GO:0045944	280760	DCN	decorin
GO:0045944	511268	PARK7	Parkinsonism associated deglycase
GO:0045944	282691	HMGB1	high mobility group box 1
GO:0045944	326578	SNW1	SNW domain containing 1
GO:0045944	614028	NPM1	nucleophosmin 1
GO:0045944	281814	HIF1A	hypoxia inducible factor 1 subunit alpha
GO:0045944	538474	NFIB	nuclear factor I B
GO:0045944	541236	XBP1	X-box binding protein 1
GO:0045944	509107	ATF4	activating transcription factor 4
GO:0045944	516979	IRF3	interferon regulatory factor 3
GO:0045944	282308	PIK3R2	phosphoinositide-3-kinase regulatory subunit 2
GO:0045944	516375	STRN3	striatin 3
GO:0045944	528135	HNRNPK	heterogeneous nuclear ribonucleoprotein K
GO:0045944	505662	SIRT7	sirtuin 7
GO:0045944	506618	FOXO1	forkhead box O1
GO:0045944	286807	SUMO2	small ubiquitin like modifier 2
GO:0045944	281867	INHBA	inhibin subunit beta A
GO:0045944	520580	CDK9	cyclin dependent kinase 9
GO:0045944	508055	CNOT7	CCR4-NOT transcription complex subunit 7
GO:0045944	521196	RAF1	Raf-1 proto-oncogene, serine/threonine kinase
GO:0045944	281137	EDN1	endothelin 1
GO:0045944	281597	ACTR3	actin related protein 3
GO:0045944	286810	PTPRN	protein tyrosine phosphatase receptor type N
GO:0045944	520800	TFE3	transcription factor binding to IGHM enhancer 3
GO:0045944	407231	MEF2A	myocyte enhancer factor 2A
GO:0045944	515652	HMGN3	high mobility group nucleosomal binding domain 3
GO:0045944	540444	HMGB2	high mobility group box 2
GO:0045944	493720	FADD	Fas associated via death domain
GO:0045944	538639	NLRP3	NLR family pyrin domain containing 3
GO:0045944	282011	PSIP1	PC4 and SFRS1 interacting protein 1
GO:0045944	767602	AP3B1	adaptor related protein complex 3 subunit beta 1
GO:0045944	281542	TP53	tumor protein p53
GO:0045944	280847	LUM	lumican
GO:0045944	528390	NR4A1	nuclear receptor subfamily 4 group A member 1
GO:0045944	282307	PIK3R1	phosphoinositide-3-kinase regulatory subunit 1
GO:0045944	281160	FGF1	fibroblast growth factor 1
GO:0045944	280826	IL6	interleukin 6
GO:0045944	505540	MAMSTR	MEF2 activating motif and SAP domain containing transcriptional regulator
GO:0045944	540374	GMEB1	glucocorticoid modulatory element binding protein 1
GO:0045944	281249	IL18	interleukin 18
GO:0045944	504512	ETV6	ETS variant transcription factor 6
GO:0045944	508692	OSR2	odd-skipped related transciption factor 2
GO:0045944	100301340	MCIDAS	multiciliate differentiation and DNA synthesis associated cell cycle protein
GO:0045944	281945	NR2F2	nuclear receptor subfamily 2 group F member 2
GO:0045944	538486	ACTR2	actin related protein 2
GO:0045944	407125	EGR1	early growth response 1
GO:0045944	519992	USP16	ubiquitin specific peptidase 16
GO:0045944	281115	DHX9	DExH-box helicase 9
GO:0045944	503577	DBP	D-box binding PAR bZIP transcription factor
GO:0006915	524166	RNF144B	ring finger protein 144B
GO:0006915	404151	DYNLL1	dynein light chain LC8-type 1
GO:0006915	407175	GDF6	growth differentiation factor 6
GO:0006915	514683	TMEM214	transmembrane protein 214
GO:0006915	508345	APIP	APAF1 interacting protein
GO:0006915	514688	PPP1R15A	protein phosphatase 1 regulatory subunit 15A
GO:0006915	282419	CSNK2A1	casein kinase 2 alpha 1
GO:0006915	618250	S100A14	S100 calcium binding protein A14
GO:0006915	281418	PPIA	peptidylprolyl isomerase A
GO:0006915	282527	TNFRSF1A	TNF receptor superfamily member 1A
GO:0006915	531436	IFT57	intraflagellar transport 57
GO:0006915	282382	TGFBR1	transforming growth factor beta receptor 1
GO:0006915	507226	TPX2	TPX2 microtubule nucleation factor
GO:0006915	510141	CIB1	calcium and integrin binding 1
GO:0006915	540032	DNAAF10	dynein axonemal assembly factor 10
GO:0006915	508365	BCL2L14	BCL2 like 14
GO:0006915	523822	TNFRSF11B	TNF receptor superfamily member 11b
GO:0006915	529336	TNFAIP8	TNF alpha induced protein 8
GO:0006915	529146	MAP3K7	mitogen-activated protein kinase kinase kinase 7
GO:0006915	615062	BCL7B	BAF chromatin remodeling complex subunit BCL7B
GO:0006915	100034674	BEX3	brain expressed X-linked 3
GO:0006915	534216	RBM5	RNA binding motif protein 5
GO:0006915	507984	ERCC3	ERCC excision repair 3, TFIIH core complex helicase subunit
GO:0006915	767586	KANK2	KN motif and ankyrin repeat domains 2
GO:0006915	541236	XBP1	X-box binding protein 1
GO:0006915	506622	TMEM219	transmembrane protein 219
GO:0006915	281061	CDK1	cyclin dependent kinase 1
GO:0006915	540966	RAD21	RAD21 cohesin complex component
GO:0006915	506618	FOXO1	forkhead box O1
GO:0006915	281402	PIM1	Pim-1 proto-oncogene, serine/threonine kinase
GO:0006915	327682	RACK1	receptor for activated C kinase 1
GO:0006915	528834	CIDEB	cell death inducing DFFA like effector b
GO:0006915	615952	BRMS1	BRMS1 transcriptional repressor and anoikis regulator
GO:0006915	282480	SLC25A6	solute carrier family 25 member 6
GO:0006915	508361	ELMO2	engulfment and cell motility 2
GO:0006915	509264	JADE1	jade family PHD finger 1
GO:0006915	504939	GADD45G	growth arrest and DNA damage inducible gamma
GO:0006915	326598	LGALS1	galectin 1
GO:0006915	538509	MINDY3	MINDY lysine 48 deubiquitinase 3
GO:0006915	407231	MEF2A	myocyte enhancer factor 2A
GO:0006915	518321	C1QBP	complement C1q binding protein
GO:0006915	523162	EMC4	ER membrane protein complex subunit 4
GO:0006915	535119	CIAPIN1	cytokine induced apoptosis inhibitor 1
GO:0006915	512913	IFI6	interferon alpha inducible protein 6
GO:0006915	281801	GRK5	G protein-coupled receptor kinase 5
GO:0006915	505710	MIEN1	migration and invasion enhancer 1
GO:0006915	508638	NOC2L	NOC2 like nucleolar associated transcriptional repressor
GO:0006915	493720	FADD	Fas associated via death domain
GO:0006915	515249	CKAP2	cytoskeleton associated protein 2
GO:0006915	414925	BIRC5	baculoviral IAP repeat containing 5
GO:0006915	523609	PRELID1	PRELI domain containing 1
GO:0006915	520979	AIMP2	aminoacyl tRNA synthetase complex interacting multifunctional protein 2
GO:0006915	618405	GADD45B	growth arrest and DNA damage inducible beta
GO:0006915	777788	DDIT3	DNA damage inducible transcript 3
GO:0006915	528390	NR4A1	nuclear receptor subfamily 4 group A member 1
GO:0006915	515854	SGK1	serum/glucocorticoid regulated kinase 1
GO:0006915	614893	CDCA7	cell division cycle associated 7
GO:0006915	509123	PDCD5	programmed cell death 5
GO:0006915	280991	AKT1	AKT serine/threonine kinase 1
GO:0051301	528378	HAUS1	HAUS augmin like complex subunit 1
GO:0051301	507226	TPX2	TPX2 microtubule nucleation factor
GO:0051301	510141	CIB1	calcium and integrin binding 1
GO:0051301	519217	CDK2	cyclin dependent kinase 2
GO:0051301	538829	PPP1CB	protein phosphatase 1 catalytic subunit beta
GO:0051301	515287	CDCA2	cell division cycle associated 2
GO:0051301	534849	ASPM	assembly factor for spindle microtubules
GO:0051301	520188	CDC25A	cell division cycle 25A
GO:0051301	281142	ENSA	endosulfine alpha
GO:0051301	509117	SPC24	SPC24 component of NDC80 kinetochore complex
GO:0051301	615414	CCND2	cyclin D2
GO:0051301	508561	FAM83D	family with sequence similarity 83 member D
GO:0051301	510809	MIS18A	MIS18 kinetochore protein A
GO:0051301	510778	CCDC124	coiled-coil domain containing 124
GO:0051301	519463	NEDD1	NEDD1 gamma-tubulin ring complex targeting factor
GO:0051301	514863	MCMBP	minichromosome maintenance complex binding protein
GO:0051301	782916	ERCC6L	ERCC excision repair 6 like, spindle assembly checkpoint helicase
GO:0051301	281671	CCNG1	cyclin G1
GO:0051301	540966	RAD21	RAD21 cohesin complex component
GO:0051301	407168	USP37	ubiquitin specific peptidase 37
GO:0051301	528138	KLHL13	kelch like family member 13
GO:0051301	281061	CDK1	cyclin dependent kinase 1
GO:0051301	504517	BABAM1	BRISC and BRCA1 A complex member 1
GO:0051301	511009	ARL8B	ADP ribosylation factor like GTPase 8B
GO:0051301	509921	SKA3	spindle and kinetochore associated complex subunit 3
GO:0051301	506632	KLHL21	kelch like family member 21
GO:0051301	540206	MASTL	microtubule associated serine/threonine kinase like
GO:0051301	506962	UBE2C	ubiquitin conjugating enzyme E2 C
GO:0051301	618880	VRK1	VRK serine/threonine kinase 1
GO:0051301	327679	CCNB1	cyclin B1
GO:0051301	504437	AURKA	aurora kinase A
GO:0051301	507703	SKA1	spindle and kinetochore associated complex subunit 1
GO:0051301	767858	MIS12	MIS12 kinetochore complex component
GO:0051301	538436	CCNE2	cyclin E2
GO:0051301	515350	SPICE1	spindle and centriole associated protein 1
GO:0051301	281080	CLTC	clathrin heavy chain
GO:0051301	508043	PTTG1	PTTG1 regulator of sister chromatid separation, securin
GO:0051301	281667	CCNA2	cyclin A2
GO:0051301	513277	NUDC	nuclear distribution C, dynein complex regulator
GO:0051301	524530	CCND1	cyclin D1
GO:0051301	519992	USP16	ubiquitin specific peptidase 16
GO:0051301	541250	PSRC1	proline and serine rich coiled-coil 1
GO:0051301	505200	CCNF	cyclin F
GO:0051301	767985	CKS2	CDC28 protein kinase regulatory subunit 2
GO:0051301	281078	CLTA	clathrin light chain A
GO:0051301	281668	CCNB2	cyclin B2
GO:0051301	515158	SPDL1	spindle apparatus coiled-coil protein 1
GO:0051301	519513	BRCC3	BRCA1/BRCA2-containing complex subunit 3
GO:0051301	414925	BIRC5	baculoviral IAP repeat containing 5
GO:0051301	510159	MAPRE2	microtubule associated protein RP/EB family member 2
GO:0018215	514158	ZDHHC6	zinc finger DHHC-type palmitoyltransferase 6
GO:0018215	506888	DLST	dihydrolipoamide S-succinyltransferase
GO:0018215	519513	BRCC3	BRCA1/BRCA2-containing complex subunit 3
GO:0018215	539417	C1GALT1	core 1 synthase, glycoprotein-N-acetylgalactosamine 3-beta-galactosyltransferase 1
GO:0018215	514559	TTL	tubulin tyrosine ligase
GO:0018215	531706	USP33	ubiquitin specific peptidase 33
GO:0018215	786491	ATAT1	alpha tubulin acetyltransferase 1
GO:0018215	515222	CRELD2	cysteine rich with EGF like domains 2
GO:0018215	515894	UFL1	UFM1 specific ligase 1
GO:0018215	539728	MOCS3	molybdenum cofactor synthesis 3
GO:0018215	100124510	BAP1	BRCA1 associated protein 1
GO:0018215	530871	QPCTL	glutaminyl-peptide cyclotransferase like
GO:0018215	282241	GALNT1	polypeptide N-acetylgalactosaminyltransferase 1
GO:0018215	493989	XYLT2	xylosyltransferase 2
GO:0018215	508042	USP4	ubiquitin specific peptidase 4
GO:0018215	519992	USP16	ubiquitin specific peptidase 16
GO:0018215	526521	DOHH	deoxyhypusine hydroxylase
GO:0018215	538509	MINDY3	MINDY lysine 48 deubiquitinase 3
GO:0018215	524749	MINDY2	MINDY lysine 48 deubiquitinase 2
GO:0018215	280841	LOX	lysyl oxidase
GO:0018215	509322	PGGT1B	protein geranylgeranyltransferase type I subunit beta
GO:0018215	281409	PLOD1	procollagen-lysine,2-oxoglutarate 5-dioxygenase 1
GO:0018215	327686	FNTB	farnesyltransferase, CAAX box, beta
GO:0018215	516122	CERCAM	cerebral endothelial cell adhesion molecule
GO:0018215	281373	P4HB	prolyl 4-hydroxylase subunit beta
GO:0018215	504854	CRELD1	cysteine rich with EGF like domains 1
GO:0018215	534273	USP21	ubiquitin specific peptidase 21
GO:0018215	407168	USP37	ubiquitin specific peptidase 37
GO:0018215	281437	QPCT	glutaminyl-peptide cyclotransferase
GO:0018215	415110	PDIA4	protein disulfide isomerase family A member 4
GO:0018215	513252	ABHD16A	abhydrolase domain containing 16A, phospholipase
GO:0018215	514394	UCHL1	ubiquitin C-terminal hydrolase L1
GO:0018215	282869	UBA1	ubiquitin like modifier activating enzyme 1
GO:0018215	613343	UBE2M	ubiquitin conjugating enzyme E2 M
GO:0018215	281528	TGM2	transglutaminase 2
GO:0018215	540183	TPST2	tyrosylprotein sulfotransferase 2
GO:0018215	510781	JOSD1	Josephin domain containing 1
GO:0018215	281169	FNTA	farnesyltransferase, CAAX box, alpha
GO:0018215	536421	CYLD	CYLD lysine 63 deubiquitinase
GO:0018215	532684	LOXL2	lysyl oxidase like 2
GO:0018215	533250	ZDHHC5	zinc finger DHHC-type palmitoyltransferase 5
GO:0018215	508343	JMJD6	jumonji domain containing 6, arginine demethylase and lysine hydroxylase
GO:0018215	507409	YKT6	YKT6 v-SNARE homolog
GO:0018215	511603	PDIA5	protein disulfide isomerase family A member 5
GO:0018215	282110	UCHL5	ubiquitin C-terminal hydrolase L5
GO:0018215	281803	PDIA3	protein disulfide isomerase family A member 3
GO:0006412	614220	RPS27L	ribosomal protein S27 like
GO:0006412	506358	MRPL20	mitochondrial ribosomal protein L20
GO:0006412	520979	AIMP2	aminoacyl tRNA synthetase complex interacting multifunctional protein 2
GO:0006412	282053	RPS3A	ribosomal protein S3A
GO:0006412	404140	RPS8	ribosomal protein S8
GO:0006412	504835	MRPL1	mitochondrial ribosomal protein L1
GO:0006412	534352	MRPL18	mitochondrial ribosomal protein L18
GO:0006412	615638	RPS27	ribosomal protein S27
GO:0006412	508221	RPL13	ribosomal protein L13
GO:0006412	506657	MRPL55	mitochondrial ribosomal protein L55
GO:0006412	510547	RPL4	ribosomal protein L4
GO:0006412	614151	MRPL30	mitochondrial ribosomal protein L30
GO:0006412	515238	RPL5	ribosomal protein L5
GO:0006412	399560	MRPL12	mitochondrial ribosomal protein L12
GO:0006412	540129	RPS23	ribosomal protein S23
GO:0006412	614579	MRPL14	mitochondrial ribosomal protein L14
GO:0006412	507168	RPL23A	ribosomal protein L23a
GO:0006412	506988	MRPL17	mitochondrial ribosomal protein L17
GO:0006412	515990	MRPL11	mitochondrial ribosomal protein L11
GO:0006412	286790	RPL10	ribosomal protein L10
GO:0006412	514569	RPS15	ribosomal protein S15
GO:0006412	513622	MRPL51	mitochondrial ribosomal protein L51
GO:0006412	504876	RPL23	ribosomal protein L23
GO:0006412	510347	MRPL15	mitochondrial ribosomal protein L15
GO:0006412	767908	RPL39	ribosomal protein L39
GO:0006412	788861	RPS17	ribosomal protein S17
GO:0006412	615556	RPL32	ribosomal protein L32
GO:0006412	507154	MRPL4	mitochondrial ribosomal protein L4
GO:0006412	510058	MRPL27	mitochondrial ribosomal protein L27
GO:0006412	510127	MRPL37	mitochondrial ribosomal protein L37
GO:0006412	505917	VWA1	von Willebrand factor A domain containing 1
GO:0006412	512745	RPL11	ribosomal protein L11
GO:0006412	540278	MRPL35	mitochondrial ribosomal protein L35
GO:0006412	787914	RPS6	ribosomal protein S6
GO:0006412	286839	RPS27A	ribosomal protein S27a
GO:0006412	539196	RPS11	ribosomal protein S11
GO:0006412	506297	RPS16	ribosomal protein S16
GO:0006468	507949	GLYCTK	glycerate kinase
GO:0006468	338037	MYLK	myosin light chain kinase
GO:0006468	618880	VRK1	VRK serine/threonine kinase 1
GO:0006468	282306	PIK3CA	phosphatidylinositol-4,5-bisphosphate 3-kinase catalytic subunit alpha
GO:0006468	505358	BRD2	bromodomain containing 2
GO:0006468	521196	RAF1	Raf-1 proto-oncogene, serine/threonine kinase
GO:0006468	514405	PLK4	polo like kinase 4
GO:0006468	512670	PHKG2	phosphorylase kinase catalytic subunit gamma 2
GO:0006468	534069	TGFB2	transforming growth factor beta 2
GO:0006468	536925	COQ8A	coenzyme Q8A
GO:0006468	281402	PIM1	Pim-1 proto-oncogene, serine/threonine kinase
GO:0006468	280991	AKT1	AKT serine/threonine kinase 1
GO:0006468	282261	IGFBP3	insulin like growth factor binding protein 3
GO:0006468	507204	NLK	nemo like kinase
GO:0006468	538238	PLK1	polo like kinase 1
GO:0006468	281357	NPR2	natriuretic peptide receptor 2
GO:0006468	509080	PKN1	protein kinase N1
GO:0006468	414925	BIRC5	baculoviral IAP repeat containing 5
GO:0006468	509437	RSRC1	arginine and serine rich coiled-coil 1
GO:0006468	282132	ADAM10	ADAM metallopeptidase domain 10
GO:0006468	519217	CDK2	cyclin dependent kinase 2
GO:0006468	352960	TRIB2	tribbles pseudokinase 2
GO:0006468	282419	CSNK2A1	casein kinase 2 alpha 1
GO:0006468	540398	PPP4C	protein phosphatase 4 catalytic subunit
GO:0006468	515723	STK40	serine/threonine kinase 40
GO:0006468	522917	RIOK3	RIO kinase 3
GO:0006468	515034	IRAK2	interleukin 1 receptor associated kinase 2
GO:0006468	281061	CDK1	cyclin dependent kinase 1
GO:0006468	538465	TRIB3	tribbles pseudokinase 3
GO:0006468	513539	LIMK2	LIM domain kinase 2
GO:0006468	533692	IRAK4	interleukin 1 receptor associated kinase 4
GO:0006468	535327	MAPK13	mitogen-activated protein kinase 13
GO:0006468	534107	PRKAB1	protein kinase AMP-activated non-catalytic subunit beta 1
GO:0043547	281515	TBCD	tubulin folding cofactor D
GO:0043547	506969	ALS2CL	ALS2 C-terminal like
GO:0043547	282466	S100A10	S100 calcium binding protein A10
GO:0043547	511736	RABEP2	rabaptin, RAB GTPase binding effector protein 2
GO:0043547	532778	ARFGAP3	ADP ribosylation factor GTPase activating protein 3
GO:0043547	535470	PIN1	peptidylprolyl cis/trans isomerase, NIMA-interacting 1
GO:0043547	508266	CHN1	chimerin 1
GO:0043547	533994	SEC23A	SEC23 homolog A, COPII coat complex component
GO:0043547	282035	RGS16	regulator of G protein signaling 16
GO:0043547	281188	GDI1	GDP dissociation inhibitor 1
GO:0043547	614550	RGS10	regulator of G protein signaling 10
GO:0043547	529002	TBC1D24	TBC1 domain family member 24
GO:0043547	507966	CDC42EP2	CDC42 effector protein 2
GO:0043547	504543	TBC1D20	TBC1 domain family member 20
GO:0043547	781865	LLGL1	LLGL scribble cell polarity complex component 1
GO:0043547	281452	RGS7	regulator of G protein signaling 7
GO:0043547	511433	DLC1	DLC1 Rho GTPase activating protein
GO:0043547	327682	RACK1	receptor for activated C kinase 1
GO:0043547	505438	ARFGAP2	ADP ribosylation factor GTPase activating protein 2
GO:0043547	617437	RGS4	regulator of G protein signaling 4
GO:0043547	338054	ARHGDIA	Rho GDP dissociation inhibitor alpha
GO:0043547	282704	TBC1D1	TBC1 domain family member 1
GO:0043547	514465	SMAP2	small ArfGAP2
GO:0043547	513828	TBC1D2	TBC1 domain family member 2
GO:0043547	510159	MAPRE2	microtubule associated protein RP/EB family member 2
GO:0043547	327705	ASAP1	ArfGAP with SH3 domain, ankyrin repeat and PH domain 1
GO:0043547	493642	CAV2	caveolin 2
GO:0043547	282032	RASA1	RAS p21 protein activator 1
GO:0043547	508582	ACAP1	ArfGAP with coiled-coil, ankyrin repeat and PH domains 1
GO:0043547	515278	ELMOD2	ELMO domain containing 2
GO:0043547	287026	PLCB1	phospholipase C beta 1
GO:0007049	100301340	MCIDAS	multiciliate differentiation and DNA synthesis associated cell cycle protein
GO:0007049	505200	CCNF	cyclin F
GO:0007049	515016	MTUS1	microtubule associated scaffold protein 1
GO:0007049	507507	MCM8	minichromosome maintenance 8 homologous recombination repair factor
GO:0007049	513446	BANP	BTG3 associated nuclear protein
GO:0007049	282099	TREX1	three prime repair exonuclease 1
GO:0007049	281078	CLTA	clathrin light chain A
GO:0007049	537703	MAPK7	mitogen-activated protein kinase 7
GO:0007049	281668	CCNB2	cyclin B2
GO:0007049	519513	BRCC3	BRCA1/BRCA2-containing complex subunit 3
GO:0007049	515249	CKAP2	cytoskeleton associated protein 2
GO:0007049	618880	VRK1	VRK serine/threonine kinase 1
GO:0007049	513642	RHNO1	RAD9-HUS1-RAD1 interacting nuclear orphan 1
GO:0007049	508901	ERH	ERH mRNA splicing and mitosis factor
GO:0007049	539167	KCTD11	potassium channel tetramerization domain containing 11
GO:0007049	327682	RACK1	receptor for activated C kinase 1
GO:0007049	281402	PIM1	Pim-1 proto-oncogene, serine/threonine kinase
GO:0007049	527565	HACE1	HECT domain and ankyrin repeat containing E3 ubiquitin protein ligase 1
GO:0007049	614488	AVPI1	arginine vasopressin induced 1
GO:0007049	782916	ERCC6L	ERCC excision repair 6 like, spindle assembly checkpoint helicase
GO:0007049	506970	MCM5	minichromosome maintenance complex component 5
GO:0007049	614615	THAP5	THAP domain containing 5
GO:0007049	536936	SUV39H2	suppressor of variegation 3-9 homolog 2
GO:0007049	504517	BABAM1	BRISC and BRCA1 A complex member 1
GO:0007049	511009	ARL8B	ADP ribosylation factor like GTPase 8B
GO:0007049	528138	KLHL13	kelch like family member 13
GO:0007049	506632	KLHL21	kelch like family member 21
GO:0007049	615197	PCNP	PEST proteolytic signal containing nuclear protein
GO:0007049	535327	MAPK13	mitogen-activated protein kinase 13
GO:0007049	353120	BRCA1	BRCA1 DNA repair associated
GO:0007049	535470	PIN1	peptidylprolyl cis/trans isomerase, NIMA-interacting 1
GO:0007049	515287	CDCA2	cell division cycle associated 2
GO:0007049	538829	PPP1CB	protein phosphatase 1 catalytic subunit beta
GO:0007049	282419	CSNK2A1	casein kinase 2 alpha 1
GO:0007049	509117	SPC24	SPC24 component of NDC80 kinetochore complex
GO:0007049	281649	BLCAP	BLCAP apoptosis inducing factor
GO:0007049	517812	MCM6	minichromosome maintenance complex component 6
GO:0007049	530411	UHRF1	ubiquitin like with PHD and ring finger domains 1
GO:0007049	519463	NEDD1	NEDD1 gamma-tubulin ring complex targeting factor
GO:0007049	510778	CCDC124	coiled-coil domain containing 124
GO:0007049	510809	MIS18A	MIS18 kinetochore protein A
GO:0043065	534216	RBM5	RNA binding motif protein 5
GO:0043065	504506	RNPS1	RNA binding protein with serine rich domain 1
GO:0043065	407216	BMP4	bone morphogenetic protein 4
GO:0043065	509977	ARL6IP5	ADP ribosylation factor like GTPase 6 interacting protein 5
GO:0043065	281781	B4GALT1	beta-1,4-galactosyltransferase 1
GO:0043065	539519	MLLT11	MLLT11 transcription factor 7 cofactor
GO:0043065	505463	GADD45A	growth arrest and DNA damage inducible alpha
GO:0043065	506618	FOXO1	forkhead box O1
GO:0043065	514460	PTPA	protein phosphatase 2 phosphatase activator
GO:0043065	282573	KCNMA1	potassium calcium-activated channel subfamily M alpha 1
GO:0043065	539003	CTNNB1	catenin beta 1
GO:0043065	282691	HMGB1	high mobility group box 1
GO:0043065	281803	PDIA3	protein disulfide isomerase family A member 3
GO:0043065	529336	TNFAIP8	TNF alpha induced protein 8
GO:0043065	615692	SAP18	Sin3A associated protein 18
GO:0043065	510376	ANKRD1	ankyrin repeat domain 1
GO:0043065	528390	NR4A1	nuclear receptor subfamily 4 group A member 1
GO:0043065	281542	TP53	tumor protein p53
GO:0043065	280826	IL6	interleukin 6
GO:0043065	507486	SHQ1	SHQ1, H/ACA ribonucleoprotein assembly factor
GO:0043065	534615	BNIP3L	BCL2 interacting protein 3 like
GO:0043065	282261	IGFBP3	insulin like growth factor binding protein 3
GO:0043065	509123	PDCD5	programmed cell death 5
GO:0043065	327682	RACK1	receptor for activated C kinase 1
GO:0043065	615342	BNIP3	BCL2 interacting protein 3
GO:0043065	505097	SMPD1	sphingomyelin phosphodiesterase 1
GO:0043065	444990	EIF5A	eukaryotic translation initiation factor 5A
GO:0043065	518321	C1QBP	complement C1q binding protein
GO:0043065	617104	FAM162A	family with sequence similarity 162 member A
GO:0000122	504512	ETV6	ETS variant transcription factor 6
GO:0000122	515499	PCNA	proliferating cell nuclear antigen
GO:0000122	538238	PLK1	polo like kinase 1
GO:0000122	281040	CAV1	caveolin 1
GO:0000122	508692	OSR2	odd-skipped related transciption factor 2
GO:0000122	515119	URI1	URI1 prefoldin like chaperone
GO:0000122	528744	PAF1	PAF1 homolog, Paf1/RNA polymerase II complex component
GO:0000122	538793	ZBTB18	zinc finger and BTB domain containing 18
GO:0000122	281542	TP53	tumor protein p53
GO:0000122	518321	C1QBP	complement C1q binding protein
GO:0000122	407231	MEF2A	myocyte enhancer factor 2A
GO:0000122	768051	ZNF22	zinc finger protein 22
GO:0000122	507319	EFNA1	ephrin A1
GO:0000122	520631	SNAI2	snail family transcriptional repressor 2
GO:0000122	524530	CCND1	cyclin D1
GO:0000122	281476	SARS1	seryl-tRNA synthetase 1
GO:0000122	513483	FBP1	fructose-bisphosphatase 1
GO:0000122	530409	PHB	prohibitin
GO:0000122	281137	EDN1	endothelin 1
GO:0000122	504876	RPL23	ribosomal protein L23
GO:0000122	505662	SIRT7	sirtuin 7
GO:0000122	516375	STRN3	striatin 3
GO:0000122	505463	GADD45A	growth arrest and DNA damage inducible alpha
GO:0000122	526129	E2F7	E2F transcription factor 7
GO:0000122	767586	KANK2	KN motif and ankyrin repeat domains 2
GO:0000122	615229	SMYD2	SET and MYND domain containing 2
GO:0000122	509107	ATF4	activating transcription factor 4
GO:0000122	516979	IRF3	interferon regulatory factor 3
GO:0000122	539003	CTNNB1	catenin beta 1
GO:0000122	519217	CDK2	cyclin dependent kinase 2
GO:0000122	514765	ZNF205	zinc finger protein 205
GO:0000122	540245	NR4A2	nuclear receptor subfamily 4 group A member 2
GO:0000122	532684	LOXL2	lysyl oxidase like 2
GO:0000122	326578	SNW1	SNW domain containing 1
GO:0000122	287023	YBX1	Y-box binding protein 1
GO:0000122	530411	UHRF1	ubiquitin like with PHD and ring finger domains 1
GO:0000122	786629	E2F8	E2F transcription factor 8
GO:0000122	539547	HES1	hes family bHLH transcription factor 1
GO:0015031	613749	RAB5C	RAB5C, member RAS oncogene family
GO:0015031	509758	BET1L	Bet1 golgi vesicular membrane trafficking protein like
GO:0015031	282707	CEP290	centrosomal protein 290
GO:0015031	511009	ARL8B	ADP ribosylation factor like GTPase 8B
GO:0015031	540482	ATG9A	autophagy related 9A
GO:0015031	282308	PIK3R2	phosphoinositide-3-kinase regulatory subunit 2
GO:0015031	281188	GDI1	GDP dissociation inhibitor 1
GO:0015031	508703	PRAF2	PRA1 domain family member 2
GO:0015031	522269	ACTN4	actinin alpha 4
GO:0015031	540237	EXOC8	exocyst complex component 8
GO:0015031	282187	COL1A1	collagen type I alpha 1 chain
GO:0015031	282335	RABGEF1	RAB guanine nucleotide exchange factor 1
GO:0015031	506336	YIF1A	Yip1 interacting factor homolog A, membrane trafficking protein
GO:0015031	509305	COG6	component of oligomeric golgi complex 6
GO:0015031	509133	MIA3	MIA SH3 domain ER export factor 3
GO:0015031	507409	YKT6	YKT6 v-SNARE homolog
GO:0015031	614242	RAB8B	RAB8B, member RAS oncogene family
GO:0015031	507751	SNX15	sorting nexin 15
GO:0015031	281937	MYO1C	myosin IC
GO:0015031	533078	ARCN1	archain 1
GO:0015031	613984	VAMP7	vesicle associated membrane protein 7
GO:0015031	281022	ARFGEF1	ADP ribosylation factor guanine nucleotide exchange factor 1
GO:0015031	532778	ARFGAP3	ADP ribosylation factor GTPase activating protein 3
GO:0015031	539670	SCAMP3	secretory carrier membrane protein 3
GO:0015031	531676	KDELR2	KDEL endoplasmic reticulum protein retention receptor 2
GO:0015031	511736	RABEP2	rabaptin, RAB GTPase binding effector protein 2
GO:0015031	512506	RANGRF	RAN guanine nucleotide release factor
GO:0015031	515866	GOLT1B	golgi transport 1B
GO:0015031	281072	LYST	lysosomal trafficking regulator
GO:0015031	404548	SEC16B	SEC16 homolog B, endoplasmic reticulum export factor
GO:0015031	281040	CAV1	caveolin 1
GO:0015031	539101	JAGN1	jagunal homolog 1
GO:0015031	505379	VAMP3	vesicle associated membrane protein 3
GO:0015031	282307	PIK3R1	phosphoinositide-3-kinase regulatory subunit 1
GO:0015031	618184	KDELR1	KDEL endoplasmic reticulum protein retention receptor 1
GO:0015031	511160	RAB18	RAB18, member RAS oncogene family
GO:0015031	522967	MYO1D	myosin ID
GO:0015031	514937	TIMM10B	translocase of inner mitochondrial membrane 10B
GO:0015031	664655	MTX1	metaxin 1
GO:0015031	540040	ARL3	ADP ribosylation factor like GTPase 3
GO:0015031	444990	EIF5A	eukaryotic translation initiation factor 5A
GO:0015031	505438	ARFGAP2	ADP ribosylation factor GTPase activating protein 2
GO:0015031	514541	RAB13	RAB13, member RAS oncogene family
GO:0015031	512427	NASP	nuclear autoantigenic sperm protein
GO:0015031	522073	RCN3	reticulocalbin 3
GO:0015031	527854	KIF20A	kinesin family member 20A
GO:0043066	538238	PLK1	polo like kinase 1
GO:0043066	415113	HSPA5	heat shock protein family A (Hsp70) member 5
GO:0043066	786336	PTMA	prothymosin alpha
GO:0043066	282307	PIK3R1	phosphoinositide-3-kinase regulatory subunit 1
GO:0043066	280826	IL6	interleukin 6
GO:0043066	510524	CTSH	cathepsin H
GO:0043066	282053	RPS3A	ribosomal protein S3A
GO:0043066	523609	PRELID1	PRELI domain containing 1
GO:0043066	414925	BIRC5	baculoviral IAP repeat containing 5
GO:0043066	281020	BCL2	BCL2 apoptosis regulator
GO:0043066	281542	TP53	tumor protein p53
GO:0043066	512913	IFI6	interferon alpha inducible protein 6
GO:0043066	617943	PCID2	PCI domain containing 2
GO:0043066	281801	GRK5	G protein-coupled receptor kinase 5
GO:0043066	505710	MIEN1	migration and invasion enhancer 1
GO:0043066	280827	IL7	interleukin 7
GO:0043066	535119	CIAPIN1	cytokine induced apoptosis inhibitor 1
GO:0043066	504437	AURKA	aurora kinase A
GO:0043066	534482	FSTL1	follistatin like 1
GO:0043066	506895	HAX1	HCLS1 associated protein X-1
GO:0043066	281402	PIM1	Pim-1 proto-oncogene, serine/threonine kinase
GO:0043066	281061	CDK1	cyclin dependent kinase 1
GO:0043066	528135	HNRNPK	heterogeneous nuclear ribonucleoprotein K
GO:0043066	539159	CTH	cystathionine gamma-lyase
GO:0043066	614028	NPM1	nucleophosmin 1
GO:0043066	541236	XBP1	X-box binding protein 1
GO:0043066	407216	BMP4	bone morphogenetic protein 4
GO:0043066	510141	CIB1	calcium and integrin binding 1
GO:0043066	539090	SPRY2	sprouty RTK signaling antagonist 2
GO:0043066	515723	STK40	serine/threonine kinase 40
GO:0043066	524166	RNF144B	ring finger protein 144B
GO:0043066	282646	HSP90B1	heat shock protein 90 beta family member 1
GO:0043066	282653	AQP1	aquaporin 1
GO:0043066	508345	APIP	APAF1 interacting protein
GO:0030335	414922	CLDN1	claudin 1
GO:0030335	281160	FGF1	fibroblast growth factor 1
GO:0030335	415113	HSPA5	heat shock protein family A (Hsp70) member 5
GO:0030335	526525	F2RL1	F2R like trypsin receptor 1
GO:0030335	526585	F2R	coagulation factor II thrombin receptor
GO:0030335	510524	CTSH	cathepsin H
GO:0030335	281040	CAV1	caveolin 1
GO:0030335	532393	NTF3	neurotrophin 3
GO:0030335	327682	RACK1	receptor for activated C kinase 1
GO:0030335	281137	EDN1	endothelin 1
GO:0030335	505710	MIEN1	migration and invasion enhancer 1
GO:0030335	615869	TRIP6	thyroid hormone receptor interactor 6
GO:0030335	780881	ARHGEF39	Rho guanine nucleotide exchange factor 39
GO:0030335	505908	PDGFA	platelet derived growth factor subunit A
GO:0030335	525159	FERMT3	FERM domain containing kindlin 3
GO:0030335	520631	SNAI2	snail family transcriptional repressor 2
GO:0030335	281876	ITGB1	integrin subunit beta 1
GO:0030335	282653	AQP1	aquaporin 1
GO:0030335	282382	TGFBR1	transforming growth factor beta receptor 1
GO:0030335	539090	SPRY2	sprouty RTK signaling antagonist 2
GO:0030335	510141	CIB1	calcium and integrin binding 1
GO:0030335	282187	COL1A1	collagen type I alpha 1 chain
GO:0050821	535470	PIN1	peptidylprolyl cis/trans isomerase, NIMA-interacting 1
GO:0050821	511268	PARK7	Parkinsonism associated deglycase
GO:0050821	782816	TRIM44	tripartite motif containing 44
GO:0050821	505313	CCT2	chaperonin containing TCP1 subunit 2
GO:0050821	281713	CREB1	cAMP responsive element binding protein 1
GO:0050821	617441	COA8	cytochrome c oxidase assembly factor 8
GO:0050821	617707	PLPP3	phospholipid phosphatase 3
GO:0050821	281181	GAPDH	glyceraldehyde-3-phosphate dehydrogenase
GO:0050821	532844	ATP1B3	ATPase Na+/K+ transporting subunit beta 3
GO:0050821	504876	RPL23	ribosomal protein L23
GO:0050821	507319	EFNA1	ephrin A1
GO:0050821	281897	LAMP1	lysosomal associated membrane protein 1
GO:0050821	530409	PHB	prohibitin
GO:0050821	281036	CALR	calreticulin
GO:0050821	281402	PIM1	Pim-1 proto-oncogene, serine/threonine kinase
GO:0050821	521522	PEX19	peroxisomal biogenesis factor 19
GO:0050821	521540	CCT6A	chaperonin containing TCP1 subunit 6A
GO:0050821	282307	PIK3R1	phosphoinositide-3-kinase regulatory subunit 1
GO:0050821	507204	NLK	nemo like kinase
GO:0050821	504735	CCT3	chaperonin containing TCP1 subunit 3
GO:0050821	512662	CHP1	calcineurin like EF-hand protein 1
GO:0050821	531706	USP33	ubiquitin specific peptidase 33
GO:0050821	281542	TP53	tumor protein p53
GO:0050821	508337	MFSD1	major facilitator superfamily domain containing 1
GO:0050790	523737	DPM2	dolichyl-phosphate mannosyltransferase subunit 2, regulatory
GO:0050790	511903	LAMTOR4	late endosomal/lysosomal adaptor, MAPK and MTOR activator 4
GO:0050790	539784	PSMD2	proteasome 26S subunit ubiquitin receptor, non-ATPase 2
GO:0050790	523124	PSD	pleckstrin and Sec7 domain containing
GO:0050790	507165	HSPH1	heat shock protein family H (Hsp110) member 1
GO:0050790	780881	ARHGEF39	Rho guanine nucleotide exchange factor 39
GO:0050790	281832	HSP90AA1	heat shock protein 90 alpha family class A member 1
GO:0050790	767602	AP3B1	adaptor related protein complex 3 subunit beta 1
GO:0050790	614849	LAMTOR1	late endosomal/lysosomal adaptor, MAPK and MTOR activator 1
GO:0050790	520875	EEF1B2	eukaryotic translation elongation factor 1 beta 2
GO:0050790	505351	NUCB1	nucleobindin 1
GO:0050790	281105	CTSB	cathepsin B
GO:0050790	538625	PSMD6	proteasome 26S subunit, non-ATPase 6
GO:0050790	615552	MGST2	microsomal glutathione S-transferase 2
GO:0050790	512506	RANGRF	RAN guanine nucleotide release factor
GO:0050790	514599	GRPEL2	GrpE like 2, mitochondrial
GO:0050790	529043	ARHGEF10L	Rho guanine nucleotide exchange factor 10 like
GO:0050790	504937	PSMD3	proteasome 26S subunit, non-ATPase 3
GO:0050790	505702	GTF2F1	general transcription factor IIF subunit 1
GO:0050790	515580	GRPEL1	GrpE like 1, mitochondrial
GO:0050790	534107	PRKAB1	protein kinase AMP-activated non-catalytic subunit beta 1
GO:0050790	538528	FBXO8	F-box protein 8
GO:0050790	512056	RASGRP2	RAS guanyl releasing protein 2
GO:0050790	281661	CAPN1	calpain 1
GO:0050790	511749	LTC4S	leukotriene C4 synthase
GO:0050790	520286	MON1A	MON1 homolog A, secretory trafficking associated
GO:0006281	507345	VCP	valosin containing protein
GO:0006281	767828	KMT5B	lysine methyltransferase 5B
GO:0006281	530411	UHRF1	ubiquitin like with PHD and ring finger domains 1
GO:0006281	529922	ZRANB3	zinc finger RANBP2-type containing 3
GO:0006281	509631	WRAP53	WD repeat containing antisense to TP53
GO:0006281	511268	PARK7	Parkinsonism associated deglycase
GO:0006281	282110	UCHL5	ubiquitin C-terminal hydrolase L5
GO:0006281	282691	HMGB1	high mobility group box 1
GO:0006281	519217	CDK2	cyclin dependent kinase 2
GO:0006281	507984	ERCC3	ERCC excision repair 3, TFIIH core complex helicase subunit
GO:0006281	353120	BRCA1	BRCA1 DNA repair associated
GO:0006281	614028	NPM1	nucleophosmin 1
GO:0006281	282224	ETAA1	ETAA1 activator of ATR kinase
GO:0006281	615510	PARPBP	PARP1 binding protein
GO:0006281	505152	POLG2	DNA polymerase gamma 2, accessory subunit
GO:0006281	505662	SIRT7	sirtuin 7
GO:0006281	508043	PTTG1	PTTG1 regulator of sister chromatid separation, securin
GO:0006281	520580	CDK9	cyclin dependent kinase 9
GO:0006281	618860	WDR48	WD repeat domain 48
GO:0006281	511767	EEPD1	endonuclease/exonuclease/phosphatase family domain containing 1
GO:0006281	533842	NABP2	nucleic acid binding protein 2
GO:0006281	782472	CGAS	cyclic GMP-AMP synthase
GO:0006281	505721	RTEL1	regulator of telomere elongation helicase 1
GO:0006281	281630	APEX1	apurinic/apyrimidinic endodeoxyribonuclease 1
GO:0006281	540228	PRMT6	protein arginine methyltransferase 6
GO:0006281	515894	UFL1	UFM1 specific ligase 1
GO:0006281	506294	KIF22	kinesin family member 22
GO:0006281	514579	ALKBH3	alkB homolog 3, alpha-ketoglutarate dependent dioxygenase
GO:0016055	768235	TMEM198	transmembrane protein 198
GO:0016055	515063	NDRG2	NDRG family member 2
GO:0016055	615062	BCL7B	BAF chromatin remodeling complex subunit BCL7B
GO:0016055	505570	GID8	GID complex subunit 8 homolog
GO:0016055	539235	CSNK2B	casein kinase 2 beta
GO:0016055	613639	TSPAN12	tetraspanin 12
GO:0016055	282419	CSNK2A1	casein kinase 2 alpha 1
GO:0016055	767901	RNF146	ring finger protein 146
GO:0016055	536421	CYLD	CYLD lysine 63 deubiquitinase
GO:0016055	513208	WDR61	WD repeat domain 61
GO:0016055	538675	CALCOCO1	calcium binding and coiled-coil domain 1
GO:0016055	510368	LRRFIP2	LRR binding FLII interacting protein 2
GO:0016055	519014	ARL6	ADP ribosylation factor like GTPase 6
GO:0016055	777788	DDIT3	DNA damage inducible transcript 3
GO:0016055	528744	PAF1	PAF1 homolog, Paf1/RNA polymerase II complex component
GO:0016055	541209	AMOTL1	angiomotin like 1
GO:0016055	507204	NLK	nemo like kinase
GO:0016055	538514	AMOTL2	angiomotin like 2
GO:0016055	280753	CPE	carboxypeptidase E
GO:0016055	531367	NXN	nucleoredoxin
GO:0016055	511596	NDP	norrin cystine knot growth factor NDP
GO:0016055	281801	GRK5	G protein-coupled receptor kinase 5
GO:0007155	317655	MYH10	myosin heavy chain 10
GO:0007155	100125302	TMEM8B	transmembrane protein 8B
GO:0007155	281872	ITGA2	integrin subunit alpha 2
GO:0007155	615869	TRIP6	thyroid hormone receptor interactor 6
GO:0007155	280746	CD9	CD9 molecule
GO:0007155	508490	ITGA3	integrin subunit alpha 3
GO:0007155	281614	ALCAM	activated leukocyte cell adhesion molecule
GO:0007155	282662	VCAN	versican
GO:0007155	281885	KITLG	KIT ligand
GO:0007155	281530	THBS1	thrombospondin 1
GO:0007155	280885	OMD	osteomodulin
GO:0007155	280863	MOG	myelin oligodendrocyte glycoprotein
GO:0007155	539547	HES1	hes family bHLH transcription factor 1
GO:0007155	507667	EMP2	epithelial membrane protein 2
GO:0007155	539003	CTNNB1	catenin beta 1
GO:0007155	359712	COL12A1	collagen type XII alpha 1 chain
GO:0007155	784675	JCAD	junctional cadherin 5 associated
GO:0007155	510141	CIB1	calcium and integrin binding 1
GO:0007155	504963	DPT	dermatopontin
GO:0007155	516122	CERCAM	cerebral endothelial cell adhesion molecule
GO:0007155	281913	MFGE8	milk fat globule EGF and factor V/VIII domain containing
GO:0007155	280712	ADA	adenosine deaminase
GO:0007155	522392	MXRA8	matrix remodeling associated 8
GO:0007155	508882	FAP	fibroblast activation protein alpha
GO:0007155	282661	CD47	CD47 molecule
GO:0007155	407107	COL4A4	collagen type IV alpha 4 chain
GO:0007155	281781	B4GALT1	beta-1,4-galactosyltransferase 1
GO:0007155	281258	F11R	F11 receptor
GO:0008285	281781	B4GALT1	beta-1,4-galactosyltransferase 1
GO:0008285	281173	FTH1	ferritin heavy chain 1
GO:0008285	504963	DPT	dermatopontin
GO:0008285	526129	E2F7	E2F transcription factor 7
GO:0008285	615229	SMYD2	SET and MYND domain containing 2
GO:0008285	507095	SPRY1	sprouty RTK signaling antagonist 1
GO:0008285	767586	KANK2	KN motif and ankyrin repeat domains 2
GO:0008285	616545	SKAP2	src kinase associated phosphoprotein 2
GO:0008285	539003	CTNNB1	catenin beta 1
GO:0008285	510141	CIB1	calcium and integrin binding 1
GO:0008285	539090	SPRY2	sprouty RTK signaling antagonist 2
GO:0008285	510244	CDKN2D	cyclin dependent kinase inhibitor 2D
GO:0008285	526585	F2R	coagulation factor II thrombin receptor
GO:0008285	509123	PDCD5	programmed cell death 5
GO:0008285	520979	AIMP2	aminoacyl tRNA synthetase complex interacting multifunctional protein 2
GO:0008285	280746	CD9	CD9 molecule
GO:0008285	282019	PTGES	prostaglandin E synthase
GO:0008285	534069	TGFB2	transforming growth factor beta 2
GO:0008285	281867	INHBA	inhibin subunit beta A
GO:0008285	534965	TES	testin LIM domain protein
GO:0008285	537391	DDAH1	dimethylarginine dimethylaminohydrolase 1
GO:0008285	521196	RAF1	Raf-1 proto-oncogene, serine/threonine kinase
GO:0008285	508055	CNOT7	CCR4-NOT transcription complex subunit 7
GO:0008285	530409	PHB	prohibitin
GO:0008284	508055	CNOT7	CCR4-NOT transcription complex subunit 7
GO:0008284	532393	NTF3	neurotrophin 3
GO:0008284	534069	TGFB2	transforming growth factor beta 2
GO:0008284	505908	PDGFA	platelet derived growth factor subunit A
GO:0008284	281801	GRK5	G protein-coupled receptor kinase 5
GO:0008284	282092	TIMP1	TIMP metallopeptidase inhibitor 1
GO:0008284	512993	WDR77	WD repeat domain 77
GO:0008284	508692	OSR2	odd-skipped related transciption factor 2
GO:0008284	510524	CTSH	cathepsin H
GO:0008284	281160	FGF1	fibroblast growth factor 1
GO:0008284	526585	F2R	coagulation factor II thrombin receptor
GO:0008284	507667	EMP2	epithelial membrane protein 2
GO:0008284	282419	CSNK2A1	casein kinase 2 alpha 1
GO:0008284	280894	PGF	placental growth factor
GO:0008284	509958	MVD	mevalonate diphosphate decarboxylase
GO:0008284	510141	CIB1	calcium and integrin binding 1
GO:0008284	787914	RPS6	ribosomal protein S6
GO:0008284	618530	ROMO1	reactive oxygen species modulator 1
GO:0008284	282132	ADAM10	ADAM metallopeptidase domain 10
GO:0008284	282479	SLC25A5	solute carrier family 25 member 5
GO:0008284	533794	SLC25A33	solute carrier family 25 member 33
GO:0008284	407216	BMP4	bone morphogenetic protein 4
GO:0008284	614028	NPM1	nucleophosmin 1
GO:0008284	505570	GID8	GID complex subunit 8 homolog
GO:0008284	504876	RPL23	ribosomal protein L23
GO:0008284	617407	COPS9	COP9 signalosome subunit 9
GO:0016567	539433	DCAF11	DDB1 and CUL4 associated factor 11
GO:0016567	515743	RNF181	ring finger protein 181
GO:0016567	539167	KCTD11	potassium channel tetramerization domain containing 11
GO:0016567	511234	NOSIP	nitric oxide synthase interacting protein
GO:0016567	617379	RNF170	ring finger protein 170
GO:0016567	327682	RACK1	receptor for activated C kinase 1
GO:0016567	616005	RNF220	ring finger protein 220
GO:0016567	519695	FBXL5	F-box and leucine rich repeat protein 5
GO:0016567	513821	FBXL22	F-box and leucine rich repeat protein 22
GO:0016567	508388	WSB2	WD repeat and SOCS box containing 2
GO:0016567	540802	ASB3	ankyrin repeat and SOCS box containing 3
GO:0016567	520348	MARCHF3	membrane associated ring-CH-type finger 3
GO:0016567	616753	CISH	cytokine inducible SH2 containing protein
GO:0016567	539091	TRIM45	tripartite motif containing 45
GO:0016567	777600	DCAF16	DDB1 and CUL4 associated factor 16
GO:0016567	505200	CCNF	cyclin F
GO:0016567	538238	PLK1	polo like kinase 1
GO:0016567	531211	FBXL14	F-box and leucine rich repeat protein 14
GO:0016567	338437	SOCS2	suppressor of cytokine signaling 2
GO:0016567	511951	DDB1	damage specific DNA binding protein 1
GO:0016567	615427	SKP1	S-phase kinase associated protein 1
GO:0016567	507345	VCP	valosin containing protein
GO:0016567	497024	NFE2L2	nuclear factor, erythroid 2 like 2
GO:0016567	506632	KLHL21	kelch like family member 21
GO:0016567	508235	FBXO7	F-box protein 7
GO:0016567	282869	UBA1	ubiquitin like modifier activating enzyme 1
GO:0016567	516550	FEM1A	fem-1 homolog A
GO:0016567	527565	HACE1	HECT domain and ankyrin repeat containing E3 ubiquitin protein ligase 1
GO:0016567	528138	KLHL13	kelch like family member 13
GO:0045892	539547	HES1	hes family bHLH transcription factor 1
GO:0045892	539003	CTNNB1	catenin beta 1
GO:0045892	532684	LOXL2	lysyl oxidase like 2
GO:0045892	514586	QARS1	glutaminyl-tRNA synthetase 1
GO:0045892	281831	HSPA8	heat shock protein family A (Hsp70) member 8
GO:0045892	510866	ZGPAT	zinc finger CCCH-type and G-patch domain containing
GO:0045892	407216	BMP4	bone morphogenetic protein 4
GO:0045892	538465	TRIB3	tribbles pseudokinase 3
GO:0045892	516375	STRN3	striatin 3
GO:0045892	536936	SUV39H2	suppressor of variegation 3-9 homolog 2
GO:0045892	616148	LBH	LBH regulator of WNT signaling pathway
GO:0045892	615952	BRMS1	BRMS1 transcriptional repressor and anoikis regulator
GO:0045892	286842	BASP1	brain abundant membrane attached signal protein 1
GO:0045892	282015	PSMC5	proteasome 26S subunit, ATPase 5
GO:0045892	508055	CNOT7	CCR4-NOT transcription complex subunit 7
GO:0045892	540444	HMGB2	high mobility group box 2
GO:0045892	506097	NFIL3	nuclear factor, interleukin 3 regulated
GO:0045892	510376	ANKRD1	ankyrin repeat domain 1
GO:0045892	414925	BIRC5	baculoviral IAP repeat containing 5
GO:0045892	538793	ZBTB18	zinc finger and BTB domain containing 18
GO:0045892	777788	DDIT3	DNA damage inducible transcript 3
GO:0045892	281542	TP53	tumor protein p53
GO:0045892	100124510	BAP1	BRCA1 associated protein 1
GO:0045892	514951	RBFOX2	RNA binding fox-1 homolog 2
GO:0045892	519937	AJUBA	ajuba LIM protein
GO:0045892	540228	PRMT6	protein arginine methyltransferase 6
GO:0060271	282148	ATP6V0D1	ATPase H+ transporting V0 subunit d1
GO:0060271	515467	TMEM237	transmembrane protein 237
GO:0060271	282707	CEP290	centrosomal protein 290
GO:0060271	281597	ACTR3	actin related protein 3
GO:0060271	540040	ARL3	ADP ribosylation factor like GTPase 3
GO:0060271	511612	SEPTIN2	septin 2
GO:0060271	614070	CIBAR1	CBY1 interacting BAR domain containing 1
GO:0060271	538735	HYLS1	HYLS1 centriolar and ciliogenesis associated
GO:0060271	511908	EHD1	EH domain containing 1
GO:0060271	404152	ATP6V1D	ATPase H+ transporting V1 subunit D
GO:0060271	519014	ARL6	ADP ribosylation factor like GTPase 6
GO:0060271	527631	PLA2G3	phospholipase A2 group III
GO:0060271	535077	GSN	gelsolin
GO:0060271	536462	ARMC9	armadillo repeat containing 9
GO:0060271	327705	ASAP1	ArfGAP with SH3 domain, ankyrin repeat and PH domain 1
GO:0060271	533952	FAM149B1	family with sequence similarity 149 member B1
GO:0060271	100301340	MCIDAS	multiciliate differentiation and DNA synthesis associated cell cycle protein
GO:0060271	408000	SEPTIN7	septin 7
GO:0060271	508031	TMEM216	transmembrane protein 216
GO:0006886	768053	AP1S1	adaptor related protein complex 1 subunit sigma 1
GO:0006886	536553	AP2S1	adaptor related protein complex 2 subunit sigma 1
GO:0006886	515216	AP2A2	adaptor related protein complex 2 subunit alpha 2
GO:0006886	281078	CLTA	clathrin light chain A
GO:0006886	617294	RPH3AL	rabphilin 3A like (without C2 domains)
GO:0006886	505089	SEC24A	SEC24 homolog A, COPII coat complex component
GO:0006886	511908	EHD1	EH domain containing 1
GO:0006886	505361	VPS16	VPS16 core subunit of CORVET and HOPS complexes
GO:0006886	281080	CLTC	clathrin heavy chain
GO:0006886	281698	CLTB	clathrin light chain B
GO:0006886	282126	YWHAH	tyrosine 3-monooxygenase/tryptophan 5-monooxygenase activation protein eta
GO:0006886	317724	USO1	USO1 vesicle transport factor
GO:0006886	508867	AP3S2	adaptor related protein complex 3 subunit sigma 2
GO:0006886	535533	COPB1	COPI coat complex subunit beta 1
GO:0006886	509769	SNX2	sorting nexin 2
GO:0006886	533994	SEC23A	SEC23 homolog A, COPII coat complex component
GO:0006886	614406	SYTL2	synaptotagmin like 2
GO:0006886	536359	AP3S1	adaptor related protein complex 3 subunit sigma 1
GO:0006886	514660	TGFBRAP1	transforming growth factor beta receptor associated protein 1
GO:0006886	616331	AP1S2	adaptor related protein complex 1 subunit sigma 2
GO:0006886	614344	SNX8	sorting nexin 8
GO:0008283	281794	GNAT1	G protein subunit alpha transducin 1
GO:0008283	514579	ALKBH3	alkB homolog 3, alpha-ketoglutarate dependent dioxygenase
GO:0008283	281249	IL18	interleukin 18
GO:0008283	767985	CKS2	CDC28 protein kinase regulatory subunit 2
GO:0008283	538416	ASCC3	activating signal cointegrator 1 complex subunit 3
GO:0008283	539924	MCM7	minichromosome maintenance complex component 7
GO:0008283	281997	PRDX1	peroxiredoxin 1
GO:0008283	282388	TXNRD1	thioredoxin reductase 1
GO:0008283	539596	TGFBI	transforming growth factor beta induced
GO:0008283	615637	ERCC1	ERCC excision repair 1, endonuclease non-catalytic subunit
GO:0008283	281061	CDK1	cyclin dependent kinase 1
GO:0008283	286797	CERT1	ceramide transporter 1
GO:0008283	780856	YPEL5	yippee like 5
GO:0008283	508561	FAM83D	family with sequence similarity 83 member D
GO:0008283	514128	BYSL	bystin like
GO:0008283	507667	EMP2	epithelial membrane protein 2
GO:0001525	767919	AAMP	angio associated migratory cell protein
GO:0001525	507692	EMC10	ER membrane protein complex subunit 10
GO:0001525	510141	CIB1	calcium and integrin binding 1
GO:0001525	613639	TSPAN12	tetraspanin 12
GO:0001525	281913	MFGE8	milk fat globule EGF and factor V/VIII domain containing
GO:0001525	508882	FAP	fibroblast activation protein alpha
GO:0001525	539596	TGFBI	transforming growth factor beta induced
GO:0001525	541236	XBP1	X-box binding protein 1
GO:0001525	507319	EFNA1	ephrin A1
GO:0001525	282143	APLN	apelin
GO:0001525	282306	PIK3CA	phosphatidylinositol-4,5-bisphosphate 3-kinase catalytic subunit alpha
GO:0001525	509963	ANGPTL4	angiopoietin like 4
GO:0001525	508861	SAT1	spermidine/spermine N1-acetyltransferase 1
GO:0001525	280794	FN1	fibronectin 1
GO:0001525	281160	FGF1	fibroblast growth factor 1
GO:0001525	281249	IL18	interleukin 18
GO:0001525	281040	CAV1	caveolin 1
GO:0001525	613987	TMEM100	transmembrane protein 100
GO:0001525	514742	SRPX2	sushi repeat containing protein X-linked 2
GO:0001525	507196	SHC1	SHC adaptor protein 1
GO:0001525	539417	C1GALT1	core 1 synthase, glycoprotein-N-acetylgalactosamine 3-beta-galactosyltransferase 1
GO:0032508	281115	DHX9	DExH-box helicase 9
GO:0032508	507507	MCM8	minichromosome maintenance 8 homologous recombination repair factor
GO:0032508	530506	SMARCAD1	SWI/SNF-related, matrix-associated actin-dependent regulator of chromatin, subfamily a, containing DEAD/H box 1
GO:0032508	538416	ASCC3	activating signal cointegrator 1 complex subunit 3
GO:0032508	509259	GTF2F2	general transcription factor IIF subunit 2
GO:0032508	509583	DHX36	DEAH-box helicase 36
GO:0032508	281302	MCM3	minichromosome maintenance complex component 3
GO:0032508	517947	DQX1	DEAQ-box RNA dependent ATPase 1
GO:0032508	782916	ERCC6L	ERCC excision repair 6 like, spindle assembly checkpoint helicase
GO:0032508	506970	MCM5	minichromosome maintenance complex component 5
GO:0032508	540969	DNA2	DNA replication helicase/nuclease 2
GO:0032508	517812	MCM6	minichromosome maintenance complex component 6
GO:0032508	529922	ZRANB3	zinc finger RANBP2-type containing 3
GO:0032508	508652	RFC2	replication factor C subunit 2
GO:0001701	282852	RDH10	retinol dehydrogenase 10
GO:0001701	533115	MSH2	mutS homolog 2
GO:0001701	281542	TP53	tumor protein p53
GO:0001701	613987	TMEM100	transmembrane protein 100
GO:0001701	531367	NXN	nucleoredoxin
GO:0001701	281137	EDN1	endothelin 1
GO:0001701	338068	ACVR1	activin A receptor type 1
GO:0001701	286797	CERT1	ceramide transporter 1
GO:0001701	535310	FKBP10	FKBP prolyl isomerase 10
GO:0001701	505152	POLG2	DNA polymerase gamma 2, accessory subunit
GO:0001701	533630	PSPH	phosphoserine phosphatase
GO:0001701	287023	YBX1	Y-box binding protein 1
GO:0001701	282132	ADAM10	ADAM metallopeptidase domain 10
GO:0001701	617914	MAFF	MAF bZIP transcription factor F
GO:0001701	539003	CTNNB1	catenin beta 1
GO:0001701	281749	EDNRA	endothelin receptor type A
GO:0001701	515219	MAFG	MAF bZIP transcription factor G
GO:0006511	534852	FBXO4	F-box protein 4
GO:0006511	506962	UBE2C	ubiquitin conjugating enzyme E2 C
GO:0006511	530186	PSMC2	proteasome 26S subunit, ATPase 2
GO:0006511	538528	FBXO8	F-box protein 8
GO:0006511	534273	USP21	ubiquitin specific peptidase 21
GO:0006511	541236	XBP1	X-box binding protein 1
GO:0006511	407168	USP37	ubiquitin specific peptidase 37
GO:0006511	514394	UCHL1	ubiquitin C-terminal hydrolase L1
GO:0006511	513461	PSMD11	proteasome 26S subunit, non-ATPase 11
GO:0006511	527565	HACE1	HECT domain and ankyrin repeat containing E3 ubiquitin protein ligase 1
GO:0006511	530411	UHRF1	ubiquitin like with PHD and ring finger domains 1
GO:0006511	536421	CYLD	CYLD lysine 63 deubiquitinase
GO:0006511	767901	RNF146	ring finger protein 146
GO:0006511	282110	UCHL5	ubiquitin C-terminal hydrolase L5
GO:0006511	531706	USP33	ubiquitin specific peptidase 33
GO:0006511	531211	FBXL14	F-box and leucine rich repeat protein 14
GO:0006511	100124510	BAP1	BRCA1 associated protein 1
GO:0006511	511951	DDB1	damage specific DNA binding protein 1
GO:0006511	508042	USP4	ubiquitin specific peptidase 4
GO:0006511	519992	USP16	ubiquitin specific peptidase 16
GO:0010628	280828	CXCL8	C-X-C motif chemokine ligand 8
GO:0010628	281040	CAV1	caveolin 1
GO:0010628	510524	CTSH	cathepsin H
GO:0010628	509123	PDCD5	programmed cell death 5
GO:0010628	508692	OSR2	odd-skipped related transciption factor 2
GO:0010628	282140	ANGPT1	angiopoietin 1
GO:0010628	504523	ZPR1	ZPR1 zinc finger
GO:0010628	281595	ACTG2	actin gamma 2, smooth muscle
GO:0010628	540444	HMGB2	high mobility group box 2
GO:0010628	509583	DHX36	DEAH-box helicase 36
GO:0010628	281125	DRD1	dopamine receptor D1
GO:0010628	534107	PRKAB1	protein kinase AMP-activated non-catalytic subunit beta 1
GO:0010628	281576	WARS1	tryptophanyl-tRNA synthetase 1
GO:0010628	504876	RPL23	ribosomal protein L23
GO:0010628	505025	ID2	inhibitor of DNA binding 2
GO:0010628	539019	CNN2	calponin 2
GO:0010628	281592	ACTA1	actin alpha 1, skeletal muscle
GO:0010628	515610	ACTA2	actin alpha 2, smooth muscle
GO:0010628	521864	VPS35	VPS35 retromer complex component
GO:0010628	540426	MSN	moesin
GO:0010628	282382	TGFBR1	transforming growth factor beta receptor 1
GO:0010628	539090	SPRY2	sprouty RTK signaling antagonist 2
GO:0008203	281157	FDX1	ferredoxin 1
GO:0008203	505097	SMPD1	sphingomyelin phosphodiesterase 1
GO:0008203	537087	GBA	glucosylceramidase beta
GO:0008203	282604	FDXR	ferredoxin reductase
GO:0008203	534582	NFE2L1	nuclear factor, erythroid 2 like 1
GO:0008203	515046	ARV1	ARV1 homolog, fatty acid homeostasis modulator
GO:0008203	616278	ERLIN2	ER lipid raft associated 2
GO:0008203	507878	SCAP	SREBF chaperone
GO:0008203	286879	LIPE	lipase E, hormone sensitive type
GO:0008203	535192	LIPC	lipase C, hepatic type
GO:0008203	280815	NPC2	NPC intracellular cholesterol transporter 2
GO:0032543	505681	MRPS2	mitochondrial ribosomal protein S2
GO:0032543	338063	NDUFA7	NADH:ubiquinone oxidoreductase subunit A7
GO:0032543	513438	MRPS35	mitochondrial ribosomal protein S35
GO:0032543	509115	MRPS7	mitochondrial ribosomal protein S7
GO:0032543	513622	MRPL51	mitochondrial ribosomal protein L51
GO:0032543	512469	MRPS5	mitochondrial ribosomal protein S5
GO:0032543	509816	MRPS11	mitochondrial ribosomal protein S11
GO:0032543	510824	MRPS18B	mitochondrial ribosomal protein S18B
GO:0032543	510899	MRPS16	mitochondrial ribosomal protein S16
GO:0032543	516004	MRPS26	mitochondrial ribosomal protein S26
GO:0032543	618357	MRPS34	mitochondrial ribosomal protein S34
GO:0032543	614343	MRPS21	mitochondrial ribosomal protein S21
GO:0032543	615431	MRPS6	mitochondrial ribosomal protein S6
GO:0032543	614102	MRPS18A	mitochondrial ribosomal protein S18A
GO:0032543	533011	MRPS25	mitochondrial ribosomal protein S25
GO:0035556	508266	CHN1	chimerin 1
GO:0035556	282382	TGFBR1	transforming growth factor beta receptor 1
GO:0035556	282010	PSEN2	presenilin 2
GO:0035556	504657	ARHGAP29	Rho GTPase activating protein 29
GO:0035556	281453	RGS9	regulator of G protein signaling 9
GO:0035556	521196	RAF1	Raf-1 proto-oncogene, serine/threonine kinase
GO:0035556	281452	RGS7	regulator of G protein signaling 7
GO:0035556	281216	GUCY1A1	guanylate cyclase 1 soluble subunit alpha 1
GO:0035556	508388	WSB2	WD repeat and SOCS box containing 2
GO:0035556	507196	SHC1	SHC adaptor protein 1
GO:0035556	281357	NPR2	natriuretic peptide receptor 2
GO:0035556	540802	ASB3	ankyrin repeat and SOCS box containing 3
GO:0035556	280828	CXCL8	C-X-C motif chemokine ligand 8
GO:0035556	540771	PLCD4	phospholipase C delta 4
GO:0035556	616753	CISH	cytokine inducible SH2 containing protein
GO:0035556	338437	SOCS2	suppressor of cytokine signaling 2
GO:0035556	515556	ABR	ABR activator of RhoGEF and GTPase
GO:0030154	508343	JMJD6	jumonji domain containing 6, arginine demethylase and lysine hydroxylase
GO:0030154	280894	PGF	placental growth factor
GO:0030154	767919	AAMP	angio associated migratory cell protein
GO:0030154	281713	CREB1	cAMP responsive element binding protein 1
GO:0030154	508115	NGRN	neugrin, neurite outgrowth associated
GO:0030154	533451	TRAPPC9	trafficking protein particle complex subunit 9
GO:0030154	536936	SUV39H2	suppressor of variegation 3-9 homolog 2
GO:0030154	506618	FOXO1	forkhead box O1
GO:0030154	282462	MEA1	male-enhanced antigen 1
GO:0030154	614612	SRD5A1	steroid 5 alpha-reductase 1
GO:0030154	281827	HSPA2	heat shock protein family A (Hsp70) member 2
GO:0030154	530447	TBCB	tubulin folding cofactor B
GO:0030154	280718	AMH	anti-Mullerian hormone
GO:0030154	515063	NDRG2	NDRG family member 2
GO:0030154	615062	BCL7B	BAF chromatin remodeling complex subunit BCL7B
GO:0030154	282660	MGP	matrix Gla protein
GO:0030154	541236	XBP1	X-box binding protein 1
GO:0030154	531367	NXN	nucleoredoxin
GO:0030154	515380	EDF1	endothelial differentiation related factor 1
GO:0030154	282140	ANGPT1	angiopoietin 1
GO:0030154	511612	SEPTIN2	septin 2
GO:0030154	404189	NME1	non-metastatic cells 1, protein (NM23A) expressed in
GO:0030154	521196	RAF1	Raf-1 proto-oncogene, serine/threonine kinase
GO:0030154	504939	GADD45G	growth arrest and DNA damage inducible gamma
GO:0030154	508990	RARRES2	retinoic acid receptor responder 2
GO:0030154	618037	CLPTM1	CLPTM1 regulator of GABA type A receptor forward trafficking
GO:0030154	536793	FXR1	FMR1 autosomal homolog 1
GO:0030154	506990	PPDPF	pancreatic progenitor cell differentiation and proliferation factor
GO:0030154	408000	SEPTIN7	septin 7
GO:0030154	618405	GADD45B	growth arrest and DNA damage inducible beta
GO:0030154	282053	RPS3A	ribosomal protein S3A
GO:0030154	537703	MAPK7	mitogen-activated protein kinase 7
GO:0007165	280718	AMH	anti-Mullerian hormone
GO:0007165	506314	IL16	interleukin 16
GO:0007165	280932	SST	somatostatin
GO:0007165	286797	CERT1	ceramide transporter 1
GO:0007165	280808	GPI	glucose-6-phosphate isomerase
GO:0007165	510267	TMPO	thymopoietin
GO:0007165	497029	GRB14	growth factor receptor bound protein 14
GO:0007165	511736	RABEP2	rabaptin, RAB GTPase binding effector protein 2
GO:0007165	338078	STC1	stanniocalcin 1
GO:0007165	280706	TG	thyroglobulin
GO:0007165	523822	TNFRSF11B	TNF receptor superfamily member 11b
GO:0007165	281935	MYO10	myosin X
GO:0007165	282092	TIMP1	TIMP metallopeptidase inhibitor 1
GO:0007165	282032	RASA1	RAS p21 protein activator 1
GO:0007165	280884	OGN	osteoglycin
GO:0007165	280857	MIA	MIA SH3 domain containing
GO:0007165	281885	KITLG	KIT ligand
GO:0007165	508582	ACAP1	ArfGAP with coiled-coil, ankyrin repeat and PH domains 1
GO:0007165	540432	MANF	mesencephalic astrocyte derived neurotrophic factor
GO:0007165	534069	TGFB2	transforming growth factor beta 2
GO:0007165	280948	TTR	transthyretin
GO:0007165	533671	CMTM8	CKLF like MARVEL transmembrane domain containing 8
GO:0007165	511671	CXCL16	C-X-C motif chemokine ligand 16
GO:0007165	511433	DLC1	DLC1 Rho GTPase activating protein
GO:0007165	280737	BTC	betacellulin
GO:0007165	280713	ADM	adrenomedullin
GO:0007165	282179	CHRNB1	cholinergic receptor nicotinic beta 1 subunit
GO:0007165	618042	VGF	VGF nerve growth factor inducible
GO:0007165	614252	RASL12	RAS like family 12
GO:0007165	282879	HGF	hepatocyte growth factor
GO:0007165	533687	RHPN2	rhophilin Rho GTPase binding protein 2
GO:0007165	281499	SPP1	secreted phosphoprotein 1
GO:0006397	534721	DDX47	DEAD-box helicase 47
GO:0006397	287023	YBX1	Y-box binding protein 1
GO:0006397	535447	LSM1	LSM1 homolog, mRNA degradation associated
GO:0006397	508343	JMJD6	jumonji domain containing 6, arginine demethylase and lysine hydroxylase
GO:0006397	768231	CPSF6	cleavage and polyadenylation specific factor 6
GO:0006397	281831	HSPA8	heat shock protein family A (Hsp70) member 8
GO:0006397	534606	RPUSD3	RNA pseudouridine synthase D3
GO:0006397	510250	THOC7	THO complex 7
GO:0006397	528135	HNRNPK	heterogeneous nuclear ribonucleoprotein K
GO:0006397	504523	ZPR1	ZPR1 zinc finger
GO:0006397	282319	PPP1R8	protein phosphatase 1 regulatory subunit 8
GO:0006397	526867	PDCD11	programmed cell death 11
GO:0006397	282298	PABPN1	poly(A) binding protein nuclear 1
GO:0006397	518321	C1QBP	complement C1q binding protein
GO:0006397	538860	PDE12	phosphodiesterase 12
GO:0006397	282018	PTBP1	polypyrimidine tract binding protein 1
GO:0006397	615692	SAP18	Sin3A associated protein 18
GO:0006397	518859	NUDT21	nudix hydrolase 21
GO:0006397	514951	RBFOX2	RNA binding fox-1 homolog 2
GO:0032981	327673	NDUFA1	NADH:ubiquinone oxidoreductase subunit A1
GO:0032981	327698	NDUFA2	NADH:ubiquinone oxidoreductase subunit A2
GO:0032981	338046	NDUFC2	NADH:ubiquinone oxidoreductase subunit C2
GO:0032981	282289	NDUFC1	NADH:ubiquinone oxidoreductase subunit C1
GO:0032981	326346	NDUFA11	NADH:ubiquinone oxidoreductase subunit A11
GO:0032981	338060	NDUFA10	NADH:ubiquinone oxidoreductase subunit A10
GO:0032981	327710	NDUFA8	NADH:ubiquinone oxidoreductase subunit A8
GO:0032981	282517	NDUFB8	NADH:ubiquinone oxidoreductase subunit B8
GO:0032981	404188	NDUFA9	NADH:ubiquinone oxidoreductase subunit A9
GO:0032981	338079	NDUFS7	NADH:ubiquinone oxidoreductase core subunit S7
GO:0032981	327660	NDUFB9	NADH:ubiquinone oxidoreductase subunit B9
GO:0032981	327690	NDUFB1	NADH:ubiquinone oxidoreductase subunit B1
GO:0032981	338073	NDUFB3	NADH:ubiquinone oxidoreductase subunit B3
GO:0032981	530597	DMAC2	distal membrane arm assembly component 2
GO:0032981	510097	FOXRED1	FAD dependent oxidoreductase domain containing 1
GO:0034976	511144	DDRGK1	DDRGK domain containing 1
GO:0034976	280828	CXCL8	C-X-C motif chemokine ligand 8
GO:0034976	777788	DDIT3	DNA damage inducible transcript 3
GO:0034976	281530	THBS1	thrombospondin 1
GO:0034976	515894	UFL1	UFM1 specific ligase 1
GO:0034976	282307	PIK3R1	phosphoinositide-3-kinase regulatory subunit 1
GO:0034976	509107	ATF4	activating transcription factor 4
GO:0034976	541236	XBP1	X-box binding protein 1
GO:0034976	538465	TRIB3	tribbles pseudokinase 3
GO:0034976	282308	PIK3R2	phosphoinositide-3-kinase regulatory subunit 2
GO:0034976	530547	UFM1	ubiquitin fold modifier 1
GO:0034976	509037	TMX1	thioredoxin related transmembrane protein 1
GO:0034976	286797	CERT1	ceramide transporter 1
GO:0006469	352960	TRIB2	tribbles pseudokinase 2
GO:0006469	281418	PPIA	peptidylprolyl isomerase A
GO:0006469	514586	QARS1	glutaminyl-tRNA synthetase 1
GO:0006469	511268	PARK7	Parkinsonism associated deglycase
GO:0006469	616052	GSKIP	GSK3B interacting protein
GO:0006469	281576	WARS1	tryptophanyl-tRNA synthetase 1
GO:0006469	538465	TRIB3	tribbles pseudokinase 3
GO:0006469	538685	ITPRIP	inositol 1,4,5-trisphosphate receptor interacting protein
GO:0006469	618405	GADD45B	growth arrest and DNA damage inducible beta
GO:0006469	512662	CHP1	calcineurin like EF-hand protein 1
GO:0006979	534640	PSMB5	proteasome 20S subunit beta 5
GO:0006979	511575	GPX8	glutathione peroxidase 8 (putative)
GO:0006979	507984	ERCC3	ERCC excision repair 3, TFIIH core complex helicase subunit
GO:0006979	282023	PTGS2	prostaglandin-endoperoxide synthase 2
GO:0006979	281235	IDH1	isocitrate dehydrogenase (NADP(+)) 1
GO:0006979	615637	ERCC1	ERCC excision repair 1, endonuclease non-catalytic subunit
GO:0006979	287027	NDUFS8	NADH:ubiquinone oxidoreductase core subunit S8
GO:0006979	525659	GCLM	glutamate-cysteine ligase modifier subunit
GO:0006979	327697	NDUFS2	NADH:ubiquinone oxidoreductase core subunit S2
GO:0006979	281997	PRDX1	peroxiredoxin 1
GO:0006979	282011	PSIP1	PC4 and SFRS1 interacting protein 1
GO:0007275	506990	PPDPF	pancreatic progenitor cell differentiation and proliferation factor
GO:0007275	618037	CLPTM1	CLPTM1 regulator of GABA type A receptor forward trafficking
GO:0007275	513446	BANP	BTG3 associated nuclear protein
GO:0007275	524150	HOXA2	homeobox A2
GO:0007275	615685	MTURN	maturin, neural progenitor differentiation regulator homolog
GO:0007275	618405	GADD45B	growth arrest and DNA damage inducible beta
GO:0007275	282127	ZFP36	ZFP36 ring finger protein
GO:0007275	505908	PDGFA	platelet derived growth factor subunit A
GO:0007275	617472	CATSPERD	cation channel sperm associated auxiliary subunit delta
GO:0007275	539381	CSRP2	cysteine and glycine rich protein 2
GO:0007275	504939	GADD45G	growth arrest and DNA damage inducible gamma
GO:0007275	515380	EDF1	endothelial differentiation related factor 1
GO:0007275	539167	KCTD11	potassium channel tetramerization domain containing 11
GO:0007275	511234	NOSIP	nitric oxide synthase interacting protein
GO:0007275	540966	RAD21	RAD21 cohesin complex component
GO:0007275	282462	MEA1	male-enhanced antigen 1
GO:0007275	512578	KCTD15	potassium channel tetramerization domain containing 15
GO:0007275	616148	LBH	LBH regulator of WNT signaling pathway
GO:0007275	768235	TMEM198	transmembrane protein 198
GO:0007275	508962	DDX25	DEAD-box helicase 25
GO:0007275	508115	NGRN	neugrin, neurite outgrowth associated
GO:0007275	407175	GDF6	growth differentiation factor 6
GO:0034599	506618	FOXO1	forkhead box O1
GO:0034599	539606	PYCR1	pyrroline-5-carboxylate reductase 1
GO:0034599	509107	ATF4	activating transcription factor 4
GO:0034599	509863	SESN2	sestrin 2
GO:0034599	281418	PPIA	peptidylprolyl isomerase A
GO:0034599	540245	NR4A2	nuclear receptor subfamily 4 group A member 2
GO:0034599	511268	PARK7	Parkinsonism associated deglycase
GO:0034599	510796	LONP1	lon peptidase 1, mitochondrial
GO:0034599	497024	NFE2L2	nuclear factor, erythroid 2 like 2
GO:0034599	504987	PYCR2	pyrroline-5-carboxylate reductase 2
GO:0034599	534582	NFE2L1	nuclear factor, erythroid 2 like 1
GO:0043410	280836	LEP	leptin
GO:0043410	507319	EFNA1	ephrin A1
GO:0043410	505908	PDGFA	platelet derived growth factor subunit A
GO:0043410	614849	LAMTOR1	late endosomal/lysosomal adaptor, MAPK and MTOR activator 1
GO:0043410	493642	CAV2	caveolin 2
GO:0043410	526585	F2R	coagulation factor II thrombin receptor
GO:0043410	280826	IL6	interleukin 6
GO:0043410	508269	TMEM106A	transmembrane protein 106A
GO:0043410	282261	IGFBP3	insulin like growth factor binding protein 3
GO:0043410	539003	CTNNB1	catenin beta 1
GO:0043410	784675	JCAD	junctional cadherin 5 associated
GO:0006357	524150	HOXA2	homeobox A2
GO:0006357	519992	USP16	ubiquitin specific peptidase 16
GO:0006357	767985	CKS2	CDC28 protein kinase regulatory subunit 2
GO:0006357	512993	WDR77	WD repeat domain 77
GO:0006357	515119	URI1	URI1 prefoldin like chaperone
GO:0006357	509080	PKN1	protein kinase N1
GO:0006357	511672	MED11	mediator complex subunit 11
GO:0006357	540444	HMGB2	high mobility group box 2
GO:0006357	505358	BRD2	bromodomain containing 2
GO:0006357	281867	INHBA	inhibin subunit beta A
GO:0006357	286796	NEDD8	NEDD8 ubiquitin like modifier
GO:0006357	281496	SOD2	superoxide dismutase 2
GO:0006357	540966	RAD21	RAD21 cohesin complex component
GO:0006357	353120	BRCA1	BRCA1 DNA repair associated
GO:0006357	282691	HMGB1	high mobility group box 1
GO:0006897	540892	DNM1L	dynamin 1 like
GO:0006897	520348	MARCHF3	membrane associated ring-CH-type finger 3
GO:0006897	531706	USP33	ubiquitin specific peptidase 33
GO:0006897	538501	UNC119	unc-119 lipid binding chaperone
GO:0006897	404189	NME1	non-metastatic cells 1, protein (NM23A) expressed in
GO:0006897	533746	DPYSL2	dihydropyrimidinase like 2
GO:0006897	511908	EHD1	EH domain containing 1
GO:0006897	509769	SNX2	sorting nexin 2
GO:0006897	517259	MICALL1	MICAL like 1
GO:0006897	539764	RAB5A	RAB5A, member RAS oncogene family
GO:0006897	280805	GHR	growth hormone receptor
GO:0006897	511736	RABEP2	rabaptin, RAB GTPase binding effector protein 2
GO:0006897	532684	LOXL2	lysyl oxidase like 2
GO:0006897	282335	RABGEF1	RAB guanine nucleotide exchange factor 1
GO:0006897	509133	MIA3	MIA SH3 domain ER export factor 3
GO:0031397	539090	SPRY2	sprouty RTK signaling antagonist 2
GO:0031397	506676	UBXN1	UBX domain protein 1
GO:0031397	618785	VPS28	VPS28 subunit of ESCRT-I
GO:0031397	505662	SIRT7	sirtuin 7
GO:0031397	531367	NXN	nucleoredoxin
GO:0031397	281040	CAV1	caveolin 1
GO:0031397	508042	USP4	ubiquitin specific peptidase 4
GO:0031397	512662	CHP1	calcineurin like EF-hand protein 1
GO:0031397	515894	UFL1	UFM1 specific ligase 1
GO:0031647	540614	SEPTIN8	septin 8
GO:0031647	535470	PIN1	peptidylprolyl cis/trans isomerase, NIMA-interacting 1
GO:0031647	408016	CASP3	caspase 3
GO:0031647	521864	VPS35	VPS35 retromer complex component
GO:0031647	507185	SLC51B	solute carrier family 51 subunit beta
GO:0031647	508042	USP4	ubiquitin specific peptidase 4
GO:0031647	504437	AURKA	aurora kinase A
GO:0031647	505401	TADA2A	transcriptional adaptor 2A
GO:0031647	511144	DDRGK1	DDRGK domain containing 1
GO:0032088	615952	BRMS1	BRMS1 transcriptional repressor and anoikis regulator
GO:0032088	512879	LRRC24	leucine rich repeat containing 24
GO:0032088	282021	PTGIS	prostaglandin I2 synthase
GO:0032088	538639	NLRP3	NLR family pyrin domain containing 3
GO:0032088	286793	PRDX2	peroxiredoxin 2
GO:0032088	512662	CHP1	calcineurin like EF-hand protein 1
GO:0032088	515894	UFL1	UFM1 specific ligase 1
GO:0032088	533953	IRAK1	interleukin 1 receptor associated kinase 1
GO:0032088	536421	CYLD	CYLD lysine 63 deubiquitinase
GO:0032088	515034	IRAK2	interleukin 1 receptor associated kinase 2
GO:0008217	281749	EDNRA	endothelin receptor type A
GO:0008217	515610	ACTA2	actin alpha 2, smooth muscle
GO:0008217	538602	EXT1	exostosin glycosyltransferase 1
GO:0008217	515161	ATP1A2	ATPase Na+/K+ transporting subunit alpha 2
GO:0008217	282023	PTGS2	prostaglandin-endoperoxide synthase 2
GO:0008217	281358	NPR3	natriuretic peptide receptor 3
GO:0008217	282188	COL1A2	collagen type I alpha 2 chain
GO:0008217	281137	EDN1	endothelin 1
GO:0008217	504813	NPY1R	neuropeptide Y receptor Y1
GO:0008217	338036	P2RX4	purinergic receptor P2X 4
GO:0008380	528135	HNRNPK	heterogeneous nuclear ribonucleoprotein K
GO:0008380	539955	LUC7L3	LUC7 like 3 pre-mRNA splicing factor
GO:0008380	510250	THOC7	THO complex 7
GO:0008380	281831	HSPA8	heat shock protein family A (Hsp70) member 8
GO:0008380	508343	JMJD6	jumonji domain containing 6, arginine demethylase and lysine hydroxylase
GO:0008380	287023	YBX1	Y-box binding protein 1
GO:0008380	535447	LSM1	LSM1 homolog, mRNA degradation associated
GO:0008380	534721	DDX47	DEAD-box helicase 47
GO:0008380	514951	RBFOX2	RNA binding fox-1 homolog 2
GO:0008380	615692	SAP18	Sin3A associated protein 18
GO:0008380	282018	PTBP1	polypyrimidine tract binding protein 1
GO:0008380	518321	C1QBP	complement C1q binding protein
GO:0008380	504523	ZPR1	ZPR1 zinc finger
GO:0008380	282319	PPP1R8	protein phosphatase 1 regulatory subunit 8
GO:0006974	539924	MCM7	minichromosome maintenance complex component 7
GO:0006974	507989	APLF	aprataxin and PNKP like factor
GO:0006974	618860	WDR48	WD repeat domain 48
GO:0006974	524530	CCND1	cyclin D1
GO:0006974	782472	CGAS	cyclic GMP-AMP synthase
GO:0006974	508051	WDR4	WD repeat domain 4
GO:0006974	533842	NABP2	nucleic acid binding protein 2
GO:0006974	613568	MACROD1	mono-ADP ribosylhydrolase 1
GO:0006974	281542	TP53	tumor protein p53
GO:0006974	614688	POLB	DNA polymerase beta
GO:0006974	507507	MCM8	minichromosome maintenance 8 homologous recombination repair factor
GO:0006974	515894	UFL1	UFM1 specific ligase 1
GO:0006974	507345	VCP	valosin containing protein
GO:0006974	529922	ZRANB3	zinc finger RANBP2-type containing 3
GO:0006974	514749	RAD51	RAD51 recombinase
GO:0006974	540206	MASTL	microtubule associated serine/threonine kinase like
GO:0006974	282224	ETAA1	ETAA1 activator of ATR kinase
GO:0006974	506618	FOXO1	forkhead box O1
GO:0006974	505662	SIRT7	sirtuin 7
GO:0006364	617906	POP7	POP7 homolog, ribonuclease P/MRP subunit
GO:0006364	513237	SBDS	SBDS ribosome maturation factor
GO:0006364	534721	DDX47	DEAD-box helicase 47
GO:0006364	508005	EXOSC9	exosome component 9
GO:0006364	526867	PDCD11	programmed cell death 11
GO:0006364	618292	EXOSC4	exosome component 4
GO:0006364	615638	RPS27	ribosomal protein S27
GO:0006364	514567	DDX27	DEAD-box helicase 27
GO:0006364	337890	RPL26	ribosomal protein L26
GO:0006364	508728	DDX56	DEAD-box helicase 56
GO:0006364	505324	UTP14A	UTP14A small subunit processome component
GO:0006914	505015	GPR137	G protein-coupled receptor 137
GO:0006914	281542	TP53	tumor protein p53
GO:0006914	537087	GBA	glucosylceramidase beta
GO:0006914	616066	DAP	death associated protein
GO:0006914	404548	SEC16B	SEC16 homolog B, endoplasmic reticulum export factor
GO:0006914	615128	TMEM39A	transmembrane protein 39A
GO:0006914	281080	CLTC	clathrin heavy chain
GO:0006914	539774	PHF23	PHD finger protein 23
GO:0006914	539478	TM9SF1	transmembrane 9 superfamily member 1
GO:0006914	506618	FOXO1	forkhead box O1
GO:0006914	507345	VCP	valosin containing protein
GO:0006914	282691	HMGB1	high mobility group box 1
GO:0006914	511268	PARK7	Parkinsonism associated deglycase
GO:0007507	281137	EDN1	endothelin 1
GO:0007507	786335	GYS1	glycogen synthase 1
GO:0007507	338068	ACVR1	activin A receptor type 1
GO:0007507	534069	TGFB2	transforming growth factor beta 2
GO:0007507	281733	CXADR	CXADR Ig-like cell adhesion molecule
GO:0007507	539696	HEXIM1	HEXIM P-TEFb complex subunit 1
GO:0007507	615492	SMG9	SMG9 nonsense mediated mRNA decay factor
GO:0007507	282382	TGFBR1	transforming growth factor beta receptor 1
GO:0007507	281749	EDNRA	endothelin receptor type A
GO:0007507	534041	MICAL2	microtubule associated monooxygenase, calponin and LIM domain containing 2
GO:0007507	282321	PPP3R1	protein phosphatase 3 regulatory subunit B, alpha
GO:0070374	282248	HCRTR1	hypocretin receptor 1
GO:0070374	407216	BMP4	bone morphogenetic protein 4
GO:0070374	539090	SPRY2	sprouty RTK signaling antagonist 2
GO:0070374	510141	CIB1	calcium and integrin binding 1
GO:0070374	282691	HMGB1	high mobility group box 1
GO:0070374	616897	PRXL2C	peroxiredoxin like 2C
GO:0070374	540287	GPR183	G protein-coupled receptor 183
GO:0070374	526525	F2RL1	F2R like trypsin receptor 1
GO:0070374	526585	F2R	coagulation factor II thrombin receptor
GO:0070374	505908	PDGFA	platelet derived growth factor subunit A
GO:0070374	282140	ANGPT1	angiopoietin 1
GO:0070374	530409	PHB	prohibitin
GO:0070374	327687	ATP6AP1	ATPase H+ transporting accessory protein 1
GO:0030199	535310	FKBP10	FKBP prolyl isomerase 10
GO:0030199	282401	ADAMTS2	ADAM metallopeptidase with thrombospondin type 1 motif 2
GO:0030199	538602	EXT1	exostosin glycosyltransferase 1
GO:0030199	282382	TGFBR1	transforming growth factor beta receptor 1
GO:0030199	532684	LOXL2	lysyl oxidase like 2
GO:0030199	282187	COL1A1	collagen type I alpha 1 chain
GO:0030199	280847	LUM	lumican
GO:0030199	534069	TGFB2	transforming growth factor beta 2
GO:0030199	282188	COL1A2	collagen type I alpha 2 chain
GO:0016310	280991	AKT1	AKT serine/threonine kinase 1
GO:0016310	530270	HYKK	hydroxylysine kinase
GO:0016310	513533	PMVK	phosphomevalonate kinase
GO:0016310	510684	PPIP5K1	diphosphoinositol pentakisphosphate kinase 1
GO:0016310	510749	PANK3	pantothenate kinase 3
GO:0016310	536925	COQ8A	coenzyme Q8A
GO:0016310	781227	PRPS1	phosphoribosyl pyrophosphate synthetase 1
GO:0016310	281217	GUK1	guanylate kinase 1
GO:0016310	286797	CERT1	ceramide transporter 1
GO:0016310	526844	DOLK	dolichol kinase
GO:0016310	530642	DCK	deoxycytidine kinase
GO:0016310	505792	MVK	mevalonate kinase
GO:0016310	516210	CKB	creatine kinase B
GO:0007420	516210	CKB	creatine kinase B
GO:0007420	514586	QARS1	glutaminyl-tRNA synthetase 1
GO:0007420	615492	SMG9	SMG9 nonsense mediated mRNA decay factor
GO:0007420	530547	UFM1	ubiquitin fold modifier 1
GO:0007420	533746	DPYSL2	dihydropyrimidinase like 2
GO:0007420	529186	CLN5	CLN5 intracellular trafficking protein
GO:0007420	509244	TMX2	thioredoxin related transmembrane protein 2
GO:0007420	529235	DDIT4	DNA damage inducible transcript 4
GO:0007420	511160	RAB18	RAB18, member RAS oncogene family
GO:0007420	287026	PLCB1	phospholipase C beta 1
GO:0051726	515646	CLIC1	chloride intracellular channel 1
GO:0051726	287026	PLCB1	phospholipase C beta 1
GO:0051726	519992	USP16	ubiquitin specific peptidase 16
GO:0051726	100124510	BAP1	BRCA1 associated protein 1
GO:0051726	514644	PHACTR4	phosphatase and actin regulator 4
GO:0051726	280836	LEP	leptin
GO:0051726	327682	RACK1	receptor for activated C kinase 1
GO:0051726	281801	GRK5	G protein-coupled receptor kinase 5
GO:0051726	528209	WDR12	WD repeat domain 12
GO:0030307	510141	CIB1	calcium and integrin binding 1
GO:0030307	282132	ADAM10	ADAM metallopeptidase domain 10
GO:0030307	533794	SLC25A33	solute carrier family 25 member 33
GO:0030307	282382	TGFBR1	transforming growth factor beta receptor 1
GO:0030307	282419	CSNK2A1	casein kinase 2 alpha 1
GO:0030307	515397	HYAL1	hyaluronidase 1
GO:0030307	541099	MTPN	myotrophin
GO:0030307	534069	TGFB2	transforming growth factor beta 2
GO:0030307	511671	CXCL16	C-X-C motif chemokine ligand 16
GO:0006099	327696	SDHC	succinate dehydrogenase complex subunit C
GO:0006099	280976	ACO2	aconitase 2
GO:0006099	281480	SDHA	succinate dehydrogenase complex flavoprotein subunit A
GO:0006099	506888	DLST	dihydrolipoamide S-succinyltransferase
GO:0006099	280682	CS	citrate synthase
GO:0006099	281235	IDH1	isocitrate dehydrogenase (NADP(+)) 1
GO:0006099	281481	SDHD	succinate dehydrogenase complex subunit D
GO:0042572	282852	RDH10	retinol dehydrogenase 10
GO:0042572	281615	ALDH1A1	aldehyde dehydrogenase 1 family member A1
GO:0042572	280948	TTR	transthyretin
GO:0042572	286879	LIPE	lipase E, hormone sensitive type
GO:0042572	281482	DHRS3	dehydrogenase/reductase 3
GO:0042572	281448	RDH5	retinol dehydrogenase 5
GO:0042572	282609	DGAT1	diacylglycerol O-acyltransferase 1
GO:0042572	281285	LRAT	lecithin retinol acyltransferase
GO:0045087	782472	CGAS	cyclic GMP-AMP synthase
GO:0045087	538639	NLRP3	NLR family pyrin domain containing 3
GO:0045087	493720	FADD	Fas associated via death domain
GO:0045087	540444	HMGB2	high mobility group box 2
GO:0045087	327662	ANXA1	annexin A1
GO:0045087	518321	C1QBP	complement C1q binding protein
GO:0045087	618441	MSRB1	methionine sulfoxide reductase B1
GO:0045087	512913	IFI6	interferon alpha inducible protein 6
GO:0045087	509583	DHX36	DEAH-box helicase 36
GO:0045087	515440	C2	complement C2
GO:0045087	524118	ARID5A	AT-rich interaction domain 5A
GO:0045087	281115	DHX9	DExH-box helicase 9
GO:0045087	767827	C1S	complement C1s
GO:0045087	507245	ECSIT	ECSIT signaling integrator
GO:0045087	526525	F2RL1	F2R like trypsin receptor 1
GO:0045087	508269	TMEM106A	transmembrane protein 106A
GO:0045087	536421	CYLD	CYLD lysine 63 deubiquitinase
GO:0045087	504781	CHID1	chitinase domain containing 1
GO:0045087	533661	STING1	stimulator of interferon response cGAMP interactor 1
GO:0045087	281536	TLR4	toll like receptor 4
GO:0045087	522917	RIOK3	RIO kinase 3
GO:0045087	539696	HEXIM1	HEXIM P-TEFb complex subunit 1
GO:0045087	282691	HMGB1	high mobility group box 1
GO:0045087	281048	CD14	CD14 molecule
GO:0045087	533692	IRAK4	interleukin 1 receptor associated kinase 4
GO:0006486	360195	FUT10	fucosyltransferase 10
GO:0006486	538602	EXT1	exostosin glycosyltransferase 1
GO:0006486	515935	NAGPA	N-acetylglucosamine-1-phosphodiester alpha-N-acetylglucosaminidase
GO:0006486	510682	DDOST	dolichyl-diphosphooligosaccharide--protein glycosyltransferase non-catalytic subunit
GO:0006486	282352	ST8SIA1	ST8 alpha-N-acetyl-neuraminide alpha-2,8-sialyltransferase 1
GO:0006486	493992	ST6GAL2	ST6 beta-galactoside alpha-2,6-sialyltransferase 2
GO:0006486	281151	EXT2	exostosin glycosyltransferase 2
GO:0006486	282854	FUT4	fucosyltransferase 4
GO:0006486	523737	DPM2	dolichyl-phosphate mannosyltransferase subunit 2, regulatory
GO:0006486	768033	OSTC	oligosaccharyltransferase complex non-catalytic subunit
GO:0006486	281174	FUT1	fucosyltransferase 1
GO:0043154	510244	CDKN2D	cyclin dependent kinase inhibitor 2D
GO:0043154	282419	CSNK2A1	casein kinase 2 alpha 1
GO:0043154	529336	TNFAIP8	TNF alpha induced protein 8
GO:0043154	508306	MICAL1	microtubule associated monooxygenase, calponin and LIM domain containing 1
GO:0043154	512913	IFI6	interferon alpha inducible protein 6
GO:0043154	414925	BIRC5	baculoviral IAP repeat containing 5
GO:0043154	528390	NR4A1	nuclear receptor subfamily 4 group A member 1
GO:0043154	516090	LAMTOR5	late endosomal/lysosomal adaptor, MAPK and MTOR activator 5
GO:0043154	280991	AKT1	AKT serine/threonine kinase 1
GO:0007219	282132	ADAM10	ADAM metallopeptidase domain 10
GO:0007219	533158	RITA1	RBPJ interacting and tubulin associated 1
GO:0007219	493993	PSENEN	presenilin enhancer, gamma-secretase subunit
GO:0007219	537946	CDH6	cadherin 6
GO:0007219	528209	WDR12	WD repeat domain 12
GO:0007219	282010	PSEN2	presenilin 2
GO:0007219	520631	SNAI2	snail family transcriptional repressor 2
GO:0007219	281206	GOT1	glutamic-oxaloacetic transaminase 1
GO:0007219	613987	TMEM100	transmembrane protein 100
GO:1902600	338089	ATP6V1C1	ATPase H+ transporting V1 subunit C1
GO:1902600	505684	ATP6V0B	ATPase H+ transporting V0 subunit b
GO:1902600	286768	ATP6V0A1	ATPase H+ transporting V0 subunit a1
GO:1902600	613541	NDUFA4L2	NDUFA4 mitochondrial complex associated like 2
GO:1902600	338082	ATP6V1B2	ATPase H+ transporting V1 subunit B2
GO:1902600	338081	ATP5F1D	ATP synthase F1 subunit delta
GO:1902600	282148	ATP6V0D1	ATPase H+ transporting V0 subunit d1
GO:1902600	511097	SLC46A1	solute carrier family 46 member 1
GO:1902600	338075	ATP6V0E1	ATPase H+ transporting V0 subunit e1
GO:1902600	317654	SLC9A1	solute carrier family 9 member A1
GO:1902600	282405	ATP6V1F	ATPase H+ transporting V1 subunit F
GO:1902600	550622	ATP6V0C	ATPase H+ transporting V0 subunit c
GO:1902600	327687	ATP6AP1	ATPase H+ transporting accessory protein 1
GO:1902600	287017	ATP6V1E1	ATPase H+ transporting V1 subunit E1
GO:0032092	533661	STING1	stimulator of interferon response cGAMP interactor 1
GO:0032092	535470	PIN1	peptidylprolyl cis/trans isomerase, NIMA-interacting 1
GO:0032092	407216	BMP4	bone morphogenetic protein 4
GO:0032092	614795	FKBP1A	FKBP prolyl isomerase 1A
GO:0032092	538465	TRIB3	tribbles pseudokinase 3
GO:0032092	523752	IDE	insulin degrading enzyme
GO:0032092	531706	USP33	ubiquitin specific peptidase 33
GO:0032092	404121	DERL1	derlin 1
GO:0032092	281040	CAV1	caveolin 1
GO:0001666	529235	DDIT4	DNA damage inducible transcript 4
GO:0001666	281137	EDN1	endothelin 1
GO:0001666	281040	CAV1	caveolin 1
GO:0001666	407125	EGR1	early growth response 1
GO:0001666	532684	LOXL2	lysyl oxidase like 2
GO:0001666	540245	NR4A2	nuclear receptor subfamily 4 group A member 2
GO:0001666	281749	EDNRA	endothelin receptor type A
GO:0001666	535470	PIN1	peptidylprolyl cis/trans isomerase, NIMA-interacting 1
GO:0001666	282573	KCNMA1	potassium calcium-activated channel subfamily M alpha 1
GO:0001666	282646	HSP90B1	heat shock protein 90 beta family member 1
GO:0001666	281814	HIF1A	hypoxia inducible factor 1 subunit alpha
GO:0006355	507729	TCEA2	transcription elongation factor A2
GO:0006355	540248	SMAD4	SMAD family member 4
GO:0006355	614675	PDLIM1	PDZ and LIM domain 1
GO:0006355	510194	HP1BP3	heterochromatin protein 1 binding protein 3
GO:0006355	614893	CDCA7	cell division cycle associated 7
GO:0006355	777788	DDIT3	DNA damage inducible transcript 3
GO:0006355	534669	GTF2I	general transcription factor IIi
GO:0006355	516874	TFB2M	transcription factor B2, mitochondrial
GO:0006355	539291	MYCBP	MYC binding protein
GO:0006355	504795	FHL3	four and a half LIM domains 3
GO:0006355	510368	LRRFIP2	LRR binding FLII interacting protein 2
GO:0006355	327693	HINT1	histidine triad nucleotide binding protein 1
GO:0006355	533803	TCEA3	transcription elongation factor A3
GO:0006355	280796	FUS	FUS RNA binding protein
GO:0006355	509107	ATF4	activating transcription factor 4
GO:0051897	282382	TGFBR1	transforming growth factor beta receptor 1
GO:0051897	539090	SPRY2	sprouty RTK signaling antagonist 2
GO:0051897	282140	ANGPT1	angiopoietin 1
GO:0051897	530409	PHB	prohibitin
GO:0051897	280836	LEP	leptin
GO:0051897	518321	C1QBP	complement C1q binding protein
GO:0051897	282306	PIK3CA	phosphatidylinositol-4,5-bisphosphate 3-kinase catalytic subunit alpha
GO:0051897	505908	PDGFA	platelet derived growth factor subunit A
GO:0051897	281249	IL18	interleukin 18
GO:0051897	404185	IGFBP5	insulin like growth factor binding protein 5
GO:0001934	513539	LIMK2	LIM domain kinase 2
GO:0001934	282023	PTGS2	prostaglandin-endoperoxide synthase 2
GO:0001934	407132	SLCO3A1	solute carrier organic anion transporter family member 3A1
GO:0001934	281572	VEGFA	vascular endothelial growth factor A
GO:0001934	535470	PIN1	peptidylprolyl cis/trans isomerase, NIMA-interacting 1
GO:0001934	510141	CIB1	calcium and integrin binding 1
GO:0001934	281418	PPIA	peptidylprolyl isomerase A
GO:0001934	508990	RARRES2	retinoic acid receptor responder 2
GO:0001934	280677	C3	complement C3
GO:0001934	327682	RACK1	receptor for activated C kinase 1
GO:0001934	524530	CCND1	cyclin D1
GO:0051289	519992	USP16	ubiquitin specific peptidase 16
GO:0051289	514902	VASP	vasodilator stimulated phosphoprotein
GO:0051289	281883	KCNJ2	potassium inwardly rectifying channel subfamily J member 2
GO:0051289	281809	HSD17B10	hydroxysteroid 17-beta dehydrogenase 10
GO:0051289	537539	ALDH9A1	aldehyde dehydrogenase 9 family member A1
GO:0051289	533020	CBR4	carbonyl reductase 4
GO:0051289	327699	ATP5IF1	ATP synthase inhibitory factor subunit 1
GO:0051289	508345	APIP	APAF1 interacting protein
GO:0051289	281590	ACACA	acetyl-CoA carboxylase alpha
GO:0001516	281137	EDN1	endothelin 1
GO:0001516	282019	PTGES	prostaglandin E synthase
GO:0001516	617001	PRXL2B	peroxiredoxin like 2B
GO:0001516	282021	PTGIS	prostaglandin I2 synthase
GO:0001516	282023	PTGS2	prostaglandin-endoperoxide synthase 2
GO:0001516	493638	PTGES3	prostaglandin E synthase 3
GO:0006633	789567	HSD17B12	hydroxysteroid 17-beta dehydrogenase 12
GO:0006633	533020	CBR4	carbonyl reductase 4
GO:0006633	353120	BRCA1	BRCA1 DNA repair associated
GO:0006633	534107	PRKAB1	protein kinase AMP-activated non-catalytic subunit beta 1
GO:0006633	353301	MECR	mitochondrial trans-2-enoyl-CoA reductase
GO:0006633	281590	ACACA	acetyl-CoA carboxylase alpha
GO:0006633	281152	FASN	fatty acid synthase
GO:0006310	527312	NSMCE4A	NSE4 homolog A, SMC5-SMC6 complex component
GO:0006310	505721	RTEL1	regulator of telomere elongation helicase 1
GO:0006310	281630	APEX1	apurinic/apyrimidinic endodeoxyribonuclease 1
GO:0006310	507232	EID3	EP300 interacting inhibitor of differentiation 3
GO:0006310	540444	HMGB2	high mobility group box 2
GO:0006310	353120	BRCA1	BRCA1 DNA repair associated
GO:0006310	282691	HMGB1	high mobility group box 1
GO:0006310	282110	UCHL5	ubiquitin C-terminal hydrolase L5
GO:0098869	511749	LTC4S	leukotriene C4 synthase
GO:0098869	282388	TXNRD1	thioredoxin reductase 1
GO:0098869	511575	GPX8	glutathione peroxidase 8 (putative)
GO:0098869	282023	PTGS2	prostaglandin-endoperoxide synthase 2
GO:0098869	615552	MGST2	microsomal glutathione S-transferase 2
GO:0098869	282438	PRDX6	peroxiredoxin 6
GO:0098869	616897	PRXL2C	peroxiredoxin like 2C
GO:0098869	511268	PARK7	Parkinsonism associated deglycase
GO:0098869	509863	SESN2	sestrin 2
GO:0098869	281999	PRDX4	peroxiredoxin 4
GO:0098869	617001	PRXL2B	peroxiredoxin like 2B
GO:0098869	531367	NXN	nucleoredoxin
GO:0098869	282019	PTGES	prostaglandin E synthase
GO:0045766	282653	AQP1	aquaporin 1
GO:0045766	767919	AAMP	angio associated migratory cell protein
GO:0045766	507692	EMC10	ER membrane protein complex subunit 10
GO:0045766	281572	VEGFA	vascular endothelial growth factor A
GO:0045766	280677	C3	complement C3
GO:0045766	282021	PTGIS	prostaglandin I2 synthase
GO:0045766	280828	CXCL8	C-X-C motif chemokine ligand 8
GO:0045766	510524	CTSH	cathepsin H
GO:0045766	515397	HYAL1	hyaluronidase 1
GO:0045766	281160	FGF1	fibroblast growth factor 1
GO:0008150	541221	ZBTB8A	zinc finger and BTB domain containing 8A
GO:0008150	281649	BLCAP	BLCAP apoptosis inducing factor
GO:0008150	530577	SACM1L	SAC1 like phosphatidylinositide phosphatase
GO:0008150	507168	RPL23A	ribosomal protein L23a
GO:0008150	508617	KIAA1191	KIAA1191
GO:0008150	537366	CDPF1	cysteine rich DPF motif domain containing 1
GO:0008150	282605	FAM13A	family with sequence similarity 13 member A
GO:0008150	281040	CAV1	caveolin 1
GO:0008150	513558	BSCL2	BSCL2 lipid droplet biogenesis associated, seipin
GO:0016579	508042	USP4	ubiquitin specific peptidase 4
GO:0016579	100124510	BAP1	BRCA1 associated protein 1
GO:0016579	531706	USP33	ubiquitin specific peptidase 33
GO:0016579	618860	WDR48	WD repeat domain 48
GO:0016579	407168	USP37	ubiquitin specific peptidase 37
GO:0016579	282110	UCHL5	ubiquitin C-terminal hydrolase L5
GO:0016579	510781	JOSD1	Josephin domain containing 1
GO:0016579	536421	CYLD	CYLD lysine 63 deubiquitinase
GO:0006954	282023	PTGS2	prostaglandin-endoperoxide synthase 2
GO:0006954	280986	AGER	advanced glycosylation end-product specific receptor
GO:0006954	515034	IRAK2	interleukin 1 receptor associated kinase 2
GO:0006954	282713	NFKBIZ	NFKB inhibitor zeta
GO:0006954	281536	TLR4	toll like receptor 4
GO:0006954	282527	TNFRSF1A	TNF receptor superfamily member 1A
GO:0006954	511268	PARK7	Parkinsonism associated deglycase
GO:0006954	767602	AP3B1	adaptor related protein complex 3 subunit beta 1
GO:0006954	281249	IL18	interleukin 18
GO:0006954	526585	F2R	coagulation factor II thrombin receptor
GO:0006954	526525	F2RL1	F2R like trypsin receptor 1
GO:0006954	515397	HYAL1	hyaluronidase 1
GO:0006954	281115	DHX9	DExH-box helicase 9
GO:0006954	281530	THBS1	thrombospondin 1
GO:0006954	280677	C3	complement C3
GO:0006954	508990	RARRES2	retinoic acid receptor responder 2
GO:0006954	327662	ANXA1	annexin A1
GO:0006954	538639	NLRP3	NLR family pyrin domain containing 3
GO:0071222	528744	PAF1	PAF1 homolog, Paf1/RNA polymerase II complex component
GO:0071222	510376	ANKRD1	ankyrin repeat domain 1
GO:0071222	280826	IL6	interleukin 6
GO:0071222	538639	NLRP3	NLR family pyrin domain containing 3
GO:0071222	282298	PABPN1	poly(A) binding protein nuclear 1
GO:0071222	282127	ZFP36	ZFP36 ring finger protein
GO:0071222	540444	HMGB2	high mobility group box 2
GO:0071222	541236	XBP1	X-box binding protein 1
GO:0071222	281048	CD14	CD14 molecule
GO:0051260	282573	KCNMA1	potassium calcium-activated channel subfamily M alpha 1
GO:0051260	535990	KCNB2	potassium voltage-gated channel subfamily B member 2
GO:0051260	508343	JMJD6	jumonji domain containing 6, arginine demethylase and lysine hydroxylase
GO:0051260	510679	ALAD	aminolevulinate dehydratase
GO:0051260	512402	SHKBP1	SH3KBP1 binding protein 1
GO:0051260	512578	KCTD15	potassium channel tetramerization domain containing 15
GO:0051260	317724	USO1	USO1 vesicle transport factor
GO:0051260	539167	KCTD11	potassium channel tetramerization domain containing 11
GO:0051260	513324	LETM1	leucine zipper and EF-hand containing transmembrane protein 1
GO:0051260	518384	KCND1	potassium voltage-gated channel subfamily D member 1
GO:0051260	520173	TMEM120A	transmembrane protein 120A
GO:0005975	616120	PGLS	6-phosphogluconolactonase
GO:0005975	522919	GNPDA1	glucosamine-6-phosphate deaminase 1
GO:0005975	281909	MANBA	mannosidase beta
GO:0005975	515397	HYAL1	hyaluronidase 1
GO:0005975	540559	LANCL1	LanC like 1
GO:0005975	281174	FUT1	fucosyltransferase 1
GO:0005975	504781	CHID1	chitinase domain containing 1
GO:0005975	281564	UGDH	UDP-glucose 6-dehydrogenase
GO:0005975	521401	AMDHD2	amidohydrolase domain containing 2
GO:0005975	513453	TALDO1	transaldolase 1
GO:0005975	281306	MDH2	malate dehydrogenase 2
GO:0006366	506097	NFIL3	nuclear factor, interleukin 3 regulated
GO:0006366	509259	GTF2F2	general transcription factor IIF subunit 2
GO:0006366	614472	POLR2I	RNA polymerase II subunit I
GO:0006366	540428	POLR2J	RNA polymerase II subunit J
GO:0006366	534669	GTF2I	general transcription factor IIi
GO:0006366	540846	ETV1	ETS variant transcription factor 1
GO:0006366	614776	POLR2K	RNA polymerase II, I and III subunit K
GO:0006366	512971	POLR2E	RNA polymerase II, I and III subunit E
GO:0006366	507984	ERCC3	ERCC excision repair 3, TFIIH core complex helicase subunit
GO:0006366	526320	POLR2G	RNA polymerase II subunit G
GO:0042632	541236	XBP1	X-box binding protein 1
GO:0042632	535192	LIPC	lipase C, hepatic type
GO:0042632	511899	INSIG1	insulin induced gene 1
GO:0042632	511378	TMEM97	transmembrane protein 97
GO:0042632	614849	LAMTOR1	late endosomal/lysosomal adaptor, MAPK and MTOR activator 1
GO:0042632	281040	CAV1	caveolin 1
GO:0042632	281249	IL18	interleukin 18
GO:0042632	511908	EHD1	EH domain containing 1
GO:0000165	535327	MAPK13	mitogen-activated protein kinase 13
GO:0000165	282125	YWHAE	tyrosine 3-monooxygenase/tryptophan 5-monooxygenase activation protein epsilon
GO:0000165	407231	MEF2A	myocyte enhancer factor 2A
GO:0000165	282127	ZFP36	ZFP36 ring finger protein
GO:0000165	282298	PABPN1	poly(A) binding protein nuclear 1
GO:0000165	537703	MAPK7	mitogen-activated protein kinase 7
GO:0000165	281249	IL18	interleukin 18
GO:0000165	507204	NLK	nemo like kinase
GO:0040008	282260	IGFBP2	insulin like growth factor binding protein 2
GO:0040008	100125302	TMEM8B	transmembrane protein 8B
GO:0040008	514432	BRMS1L	breast cancer metastasis-suppressor 1 like
GO:0040008	539167	KCTD11	potassium channel tetramerization domain containing 11
GO:0040008	534349	UBE2E3	ubiquitin conjugating enzyme E2 E3
GO:0040008	445425	TKT	transketolase
GO:0040008	507196	SHC1	SHC adaptor protein 1
GO:0040008	616753	CISH	cytokine inducible SH2 containing protein
GO:0055085	507185	SLC51B	solute carrier family 51 subunit beta
GO:0055085	508337	MFSD1	major facilitator superfamily domain containing 1
GO:0055085	404152	ATP6V1D	ATPase H+ transporting V1 subunit D
GO:0055085	540841	SLC10A6	solute carrier family 10 (sodium/bile acid cotransporter), member 6
GO:0055085	509009	SLC35E3	solute carrier family 35 member E3
GO:0055085	505997	SPNS1	sphingolipid transporter 1 (putative)
GO:0055085	280936	SV2A	synaptic vesicle glycoprotein 2A
GO:0055085	527786	SLC25A25	solute carrier family 25 member 25
GO:0055085	539848	SLC22A17	solute carrier family 22 member 17
GO:0055085	407132	SLCO3A1	solute carrier organic anion transporter family member 3A1
GO:0055085	613948	SLC25A40	solute carrier family 25, member 40
GO:0055085	504534	SLC10A3	solute carrier family 10 member 3
GO:0055085	282524	SLC25A16	solute carrier family 25 member 16
GO:0072659	514383	ZFYVE27	zinc finger FYVE-type containing 27
GO:0072659	514541	RAB13	RAB13, member RAS oncogene family
GO:0072659	768052	PIGW	phosphatidylinositol glycan anchor biosynthesis class W
GO:0072659	511435	CD81	CD81 molecule
GO:0072659	509977	ARL6IP5	ADP ribosylation factor like GTPase 6 interacting protein 5
GO:0072659	532844	ATP1B3	ATPase Na+/K+ transporting subunit beta 3
GO:0072659	535990	KCNB2	potassium voltage-gated channel subfamily B member 2
GO:0072659	507667	EMP2	epithelial membrane protein 2
GO:0072659	282466	S100A10	S100 calcium binding protein A10
GO:0007186	617437	RGS4	regulator of G protein signaling 4
GO:0007186	281453	RGS9	regulator of G protein signaling 9
GO:0007186	281452	RGS7	regulator of G protein signaling 7
GO:0007186	515148	GPR173	G protein-coupled receptor 173
GO:0007186	526585	F2R	coagulation factor II thrombin receptor
GO:0007186	281799	GPR68	G protein-coupled receptor 68
GO:0007186	281203	GNG2	G protein subunit gamma 2
GO:0007186	540287	GPR183	G protein-coupled receptor 183
GO:0007186	788252	ADGRL1	adhesion G protein-coupled receptor L1
GO:0007186	527140	CALCRL	calcitonin receptor like receptor
GO:0007186	281278	ADGRL2	adhesion G protein-coupled receptor L2
GO:0007186	317756	GPBAR1	G protein-coupled bile acid receptor 1
GO:0007186	515331	PTGDR	prostaglandin D2 receptor
GO:0007186	282035	RGS16	regulator of G protein signaling 16
GO:0051092	407132	SLCO3A1	solute carrier organic anion transporter family member 3A1
GO:0051092	539159	CTH	cystathionine gamma-lyase
GO:0051092	510141	CIB1	calcium and integrin binding 1
GO:0051092	281418	PPIA	peptidylprolyl isomerase A
GO:0051092	281115	DHX9	DExH-box helicase 9
GO:0051092	281040	CAV1	caveolin 1
GO:0051092	281249	IL18	interleukin 18
GO:0051092	541099	MTPN	myotrophin
GO:0051092	538639	NLRP3	NLR family pyrin domain containing 3
GO:0051092	511144	DDRGK1	DDRGK domain containing 1
GO:0007596	281529	THBD	thrombomodulin
GO:0007596	281626	ANXA5	annexin A5
GO:0007596	526525	F2RL1	F2R like trypsin receptor 1
GO:0007596	282005	PROCR	protein C receptor
GO:0007596	445422	VKORC1	vitamin K epoxide reductase complex subunit 1
GO:0007596	767602	AP3B1	adaptor related protein complex 3 subunit beta 1
GO:0007596	280897	PLG	plasminogen
GO:0007596	538583	ENPP4	ectonucleotide pyrophosphatase/phosphodiesterase 4
GO:0007596	282006	PROS1	protein S
GO:0045444	540245	NR4A2	nuclear receptor subfamily 4 group A member 2
GO:0045444	407175	GDF6	growth differentiation factor 6
GO:0045444	508790	TMEM120B	transmembrane protein 120B
GO:0045444	282859	CBY1	chibby family member 1, beta catenin antagonist
GO:0045444	513558	BSCL2	BSCL2 lipid droplet biogenesis associated, seipin
GO:0045444	528390	NR4A1	nuclear receptor subfamily 4 group A member 1
GO:0045444	520173	TMEM120A	transmembrane protein 120A
GO:0070373	515063	NDRG2	NDRG family member 2
GO:0070373	507095	SPRY1	sprouty RTK signaling antagonist 1
GO:0070373	535470	PIN1	peptidylprolyl cis/trans isomerase, NIMA-interacting 1
GO:0070373	539090	SPRY2	sprouty RTK signaling antagonist 2
GO:0070373	504593	SPRY4	sprouty RTK signaling antagonist 4
GO:0070373	541175	DUSP10	dual specificity phosphatase 10
GO:0070373	530409	PHB	prohibitin
GO:0006635	511082	ACAT1	acetyl-CoA acetyltransferase 1
GO:0006635	281748	ECHS1	enoyl-CoA hydratase, short chain 1
GO:0006635	281092	CROT	carnitine O-octanoyltransferase
GO:0006635	522006	ACAA2	acetyl-CoA acyltransferase 2
GO:0006635	281809	HSD17B10	hydroxysteroid 17-beta dehydrogenase 10
GO:0006508	534933	SCRN1	secernin 1
GO:0006508	513156	XPNPEP1	X-prolyl aminopeptidase 1
GO:0006508	408016	CASP3	caspase 3
GO:0006508	511268	PARK7	Parkinsonism associated deglycase
GO:0006508	514666	APEH	acylaminoacyl-peptide hydrolase
GO:0006508	280897	PLG	plasminogen
GO:0006508	781648	LAP3	leucine aminopeptidase 3
GO:0006508	538575	PRSS23	serine protease 23
GO:0006508	281374	FURIN	furin, paired basic amino acid cleaving enzyme
GO:0006508	281661	CAPN1	calpain 1
GO:0006508	518169	CTSA	cathepsin A
GO:0006508	282879	HGF	hepatocyte growth factor
GO:0006508	511711	FGL2	fibrinogen like 2
GO:0006508	282603	PRSS2	serine protease 2
GO:0006508	506882	DNPEP	aspartyl aminopeptidase
GO:0006508	286805	ADAMTS5	ADAM metallopeptidase with thrombospondin type 1 motif 5
GO:0006508	767827	C1S	complement C1s
GO:0006508	510524	CTSH	cathepsin H
GO:0006508	527590	MMP23	matrix metallopeptidase 23
GO:0006508	512082	PIK3IP1	phosphoinositide-3-kinase interacting protein 1
GO:0006508	511983	SCRN3	secernin 3
GO:0006508	515440	C2	complement C2
GO:0051781	281160	FGF1	fibroblast growth factor 1
GO:0051781	282121	VEGFB	vascular endothelial growth factor B
GO:0051781	534069	TGFB2	transforming growth factor beta 2
GO:0051781	280737	BTC	betacellulin
GO:0051781	505908	PDGFA	platelet derived growth factor subunit A
GO:0051781	281572	VEGFA	vascular endothelial growth factor A
GO:0051781	287023	YBX1	Y-box binding protein 1
GO:0051781	280894	PGF	placental growth factor
GO:0006325	513878	BUD23	BUD23 rRNA methyltransferase and ribosome maturation factor
GO:0006325	504517	BABAM1	BRISC and BRCA1 A complex member 1
GO:0006325	507897	DNAJC2	DnaJ heat shock protein family (Hsp40) member C2
GO:0006325	513297	L3MBTL2	L3MBTL histone methyl-lysine binding protein 2
GO:0006325	513446	BANP	BTG3 associated nuclear protein
GO:0006325	519857	PRDM6	PR/SET domain 6
GO:0006325	515652	HMGN3	high mobility group nucleosomal binding domain 3
GO:0006325	768207	SS18L1	SS18L1 subunit of BAF chromatin remodeling complex
GO:0030308	510244	CDKN2D	cyclin dependent kinase inhibitor 2D
GO:0030308	509863	SESN2	sestrin 2
GO:0030308	281542	TP53	tumor protein p53
GO:0030308	515397	HYAL1	hyaluronidase 1
GO:0030308	513483	FBP1	fructose-bisphosphatase 1
GO:0030308	530409	PHB	prohibitin
GO:0030308	327682	RACK1	receptor for activated C kinase 1
GO:0030308	534069	TGFB2	transforming growth factor beta 2
GO:0030308	281867	INHBA	inhibin subunit beta A
GO:0006260	540739	GRWD1	glutamate rich WD repeat containing 1
GO:0006260	512427	NASP	nuclear autoantigenic sperm protein
GO:0006260	505721	RTEL1	regulator of telomere elongation helicase 1
GO:0006260	514793	POLA2	DNA polymerase alpha 2, accessory subunit
GO:0006260	616242	FEN1	flap structure-specific endonuclease 1
GO:0006260	281115	DHX9	DExH-box helicase 9
GO:0006260	507507	MCM8	minichromosome maintenance 8 homologous recombination repair factor
GO:0006260	538474	NFIB	nuclear factor I B
GO:0006260	540969	DNA2	DNA replication helicase/nuclease 2
GO:0090263	505570	GID8	GID complex subunit 8 homolog
GO:0090263	616052	GSKIP	GSK3B interacting protein
GO:0090263	282187	COL1A1	collagen type I alpha 1 chain
GO:0090263	535470	PIN1	peptidylprolyl cis/trans isomerase, NIMA-interacting 1
GO:0090263	767901	RNF146	ring finger protein 146
GO:0090263	281040	CAV1	caveolin 1
GO:0090263	616005	RNF220	ring finger protein 220
GO:0006096	287019	PFKFB2	6-phosphofructo-2-kinase/fructose-2,6-biphosphatase 2
GO:0006096	532231	GAPDHS	glyceraldehyde-3-phosphate dehydrogenase, spermatogenic
GO:0006096	540303	ENO3	enolase 3
GO:0006096	280808	GPI	glucose-6-phosphate isomerase
GO:0006096	534599	OGDH	oxoglutarate dehydrogenase
GO:0006096	281181	GAPDH	glyceraldehyde-3-phosphate dehydrogenase
GO:0006096	518158	ADPGK	ADP dependent glucokinase
GO:0051865	535190	TRIM13	tripartite motif containing 13
GO:0051865	616005	RNF220	ring finger protein 220
GO:0051865	353120	BRCA1	BRCA1 DNA repair associated
GO:0051865	541003	UBE2D2	ubiquitin conjugating enzyme E2 D2
GO:0051865	515680	NFX1	nuclear transcription factor, X-box binding 1
GO:0051865	520757	RNF10	ring finger protein 10
GO:0051865	530411	UHRF1	ubiquitin like with PHD and ring finger domains 1
GO:0051865	767901	RNF146	ring finger protein 146
GO:0006417	525647	MKNK1	MAPK interacting serine/threonine kinase 1
GO:0006417	280991	AKT1	AKT serine/threonine kinase 1
GO:0006417	518045	RBM8A	RNA binding motif protein 8A
GO:0006417	286790	RPL10	ribosomal protein L10
GO:0006417	281181	GAPDH	glyceraldehyde-3-phosphate dehydrogenase
GO:0006417	514688	PPP1R15A	protein phosphatase 1 regulatory subunit 15A
GO:0006417	508962	DDX25	DEAD-box helicase 25
GO:0032869	282308	PIK3R2	phosphoinositide-3-kinase regulatory subunit 2
GO:0032869	538465	TRIB3	tribbles pseudokinase 3
GO:0032869	506618	FOXO1	forkhead box O1
GO:0032869	533794	SLC25A33	solute carrier family 25 member 33
GO:0032869	282307	PIK3R1	phosphoinositide-3-kinase regulatory subunit 1
GO:0032869	281206	GOT1	glutamic-oxaloacetic transaminase 1
GO:0032869	514541	RAB13	RAB13, member RAS oncogene family
GO:0006006	280991	AKT1	AKT serine/threonine kinase 1
GO:0006006	504813	NPY1R	neuropeptide Y receptor Y1
GO:0006006	282306	PIK3CA	phosphatidylinositol-4,5-bisphosphate 3-kinase catalytic subunit alpha
GO:0006006	532231	GAPDHS	glyceraldehyde-3-phosphate dehydrogenase, spermatogenic
GO:0006006	281760	FABP5	fatty acid binding protein 5
GO:0006006	518158	ADPGK	ADP dependent glucokinase
GO:0006006	281181	GAPDH	glyceraldehyde-3-phosphate dehydrogenase
GO:0043524	540245	NR4A2	nuclear receptor subfamily 4 group A member 2
GO:0043524	282216	DNAJC5	DnaJ heat shock protein family (Hsp40) member C5
GO:0043524	282306	PIK3CA	phosphatidylinositol-4,5-bisphosphate 3-kinase catalytic subunit alpha
GO:0043524	282032	RASA1	RAS p21 protein activator 1
GO:0043524	527631	PLA2G3	phospholipase A2 group III
GO:0043524	414925	BIRC5	baculoviral IAP repeat containing 5
GO:0043524	533115	MSH2	mutS homolog 2
GO:0043524	526585	F2R	coagulation factor II thrombin receptor
GO:0000398	509437	RSRC1	arginine and serine rich coiled-coil 1
GO:0000398	326578	SNW1	SNW domain containing 1
GO:0000398	510322	PRPF3	pre-mRNA processing factor 3
GO:0000398	613304	SNRPB	small nuclear ribonucleoprotein polypeptides B and B1
GO:0000398	531382	METTL14	methyltransferase like 14
GO:0000398	789082	SF3A2	splicing factor 3a subunit 2
GO:0000398	518045	RBM8A	RNA binding motif protein 8A
GO:0000398	533951	PLRG1	pleiotropic regulator 1
GO:0000398	514932	SNRPD2	small nuclear ribonucleoprotein D2 polypeptide
GO:0000398	615136	LSM5	LSM5 homolog, U6 small nuclear RNA and mRNA degradation associated
GO:0000398	540191	DDX39B	DExD-box helicase 39B
GO:0018105	538238	PLK1	polo like kinase 1
GO:0018105	280991	AKT1	AKT serine/threonine kinase 1
GO:0018105	537703	MAPK7	mitogen-activated protein kinase 7
GO:0018105	282382	TGFBR1	transforming growth factor beta receptor 1
GO:0018105	519217	CDK2	cyclin dependent kinase 2
GO:0018105	282419	CSNK2A1	casein kinase 2 alpha 1
GO:0018105	281061	CDK1	cyclin dependent kinase 1
GO:0016192	537211	TRAPPC11	trafficking protein particle complex subunit 11
GO:0016192	539101	JAGN1	jagunal homolog 1
GO:0016192	514383	ZFYVE27	zinc finger FYVE-type containing 27
GO:0016192	505379	VAMP3	vesicle associated membrane protein 3
GO:0016192	515866	GOLT1B	golgi transport 1B
GO:0016192	613984	VAMP7	vesicle associated membrane protein 7
GO:0016192	520286	MON1A	MON1 homolog A, secretory trafficking associated
GO:0050918	532393	NTF3	neurotrophin 3
GO:0050918	282140	ANGPT1	angiopoietin 1
GO:0050918	282121	VEGFB	vascular endothelial growth factor B
GO:0050918	540444	HMGB2	high mobility group box 2
GO:0050918	280894	PGF	placental growth factor
GO:0050918	282691	HMGB1	high mobility group box 1
GO:0050918	407216	BMP4	bone morphogenetic protein 4
GO:0050918	281572	VEGFA	vascular endothelial growth factor A
GO:0007005	533794	SLC25A33	solute carrier family 25 member 33
GO:0007005	511268	PARK7	Parkinsonism associated deglycase
GO:0007005	520313	GABPB1	GA binding protein transcription factor subunit beta 1
GO:0007005	530409	PHB	prohibitin
GO:0007005	281733	CXADR	CXADR Ig-like cell adhesion molecule
GO:0007005	281809	HSD17B10	hydroxysteroid 17-beta dehydrogenase 10
GO:0007005	493642	CAV2	caveolin 2
GO:0048511	536936	SUV39H2	suppressor of variegation 3-9 homolog 2
GO:0048511	281061	CDK1	cyclin dependent kinase 1
GO:0048511	282419	CSNK2A1	casein kinase 2 alpha 1
GO:0048511	540892	DNM1L	dynamin 1 like
GO:0048511	281115	DHX9	DExH-box helicase 9
GO:0048511	511951	DDB1	damage specific DNA binding protein 1
GO:0048511	327682	RACK1	receptor for activated C kinase 1
GO:0007050	280828	CXCL8	C-X-C motif chemokine ligand 8
GO:0007050	777788	DDIT3	DNA damage inducible transcript 3
GO:0007050	534497	PMP22	peripheral myelin protein 22
GO:0007050	533115	MSH2	mutS homolog 2
GO:0007050	281867	INHBA	inhibin subunit beta A
GO:0007050	534069	TGFB2	transforming growth factor beta 2
GO:0007050	510244	CDKN2D	cyclin dependent kinase inhibitor 2D
GO:1902476	513953	SLC26A2	solute carrier family 26 member 2
GO:1902476	519085	CLCC1	chloride channel CLIC like 1
GO:1902476	281696	CLIC5	chloride intracellular channel 5
GO:1902476	616392	PACC1	proton activated chloride channel 1
GO:1902476	513545	CLCN7	chloride voltage-gated channel 7
GO:1902476	515646	CLIC1	chloride intracellular channel 1
GO:1902476	282353	SLC1A1	solute carrier family 1 member 1
GO:0051091	533661	STING1	stimulator of interferon response cGAMP interactor 1
GO:0051091	617707	PLPP3	phospholipid phosphatase 3
GO:0051091	783538	ARID5B	AT-rich interaction domain 5B
GO:0051091	539003	CTNNB1	catenin beta 1
GO:0051091	281137	EDN1	endothelin 1
GO:0051091	511596	NDP	norrin cystine knot growth factor NDP
GO:0051091	280826	IL6	interleukin 6
GO:0070936	539313	UBE2H	ubiquitin conjugating enzyme E2 H
GO:0070936	534349	UBE2E3	ubiquitin conjugating enzyme E2 E3
GO:0070936	535287	UBE2D1	ubiquitin conjugating enzyme E2 D1
GO:0070936	767901	RNF146	ring finger protein 146
GO:0070936	527565	HACE1	HECT domain and ankyrin repeat containing E3 ubiquitin protein ligase 1
GO:0070936	541003	UBE2D2	ubiquitin conjugating enzyme E2 D2
GO:0070936	506962	UBE2C	ubiquitin conjugating enzyme E2 C
GO:0000413	534182	FKBP9	FKBP prolyl isomerase 9
GO:0000413	538998	FKBP2	FKBP prolyl isomerase 2
GO:0000413	535494	PPIC	peptidylprolyl isomerase C
GO:0000413	614795	FKBP1A	FKBP prolyl isomerase 1A
GO:0000413	535310	FKBP10	FKBP prolyl isomerase 10
GO:0000413	514460	PTPA	protein phosphatase 2 phosphatase activator
GO:0000413	535470	PIN1	peptidylprolyl cis/trans isomerase, NIMA-interacting 1
GO:0000413	281418	PPIA	peptidylprolyl isomerase A
GO:0008360	317655	MYH10	myosin heavy chain 10
GO:0008360	280794	FN1	fibronectin 1
GO:0008360	327662	ANXA1	annexin A1
GO:0008360	281935	MYO10	myosin X
GO:0008360	781044	RHOU	ras homolog family member U
GO:0008360	281574	EZR	ezrin
GO:0008360	540426	MSN	moesin
GO:0008360	538314	TBCCD1	TBCC domain containing 1
GO:0008360	507837	BAIAP2	BAR/IMD domain containing adaptor protein 2
GO:0006334	282691	HMGB1	high mobility group box 1
GO:0006334	508508	NAP1L5	nucleosome assembly protein 1 like 5
GO:0006334	510194	HP1BP3	heterochromatin protein 1 binding protein 3
GO:0006334	540739	GRWD1	glutamate rich WD repeat containing 1
GO:0006334	505358	BRD2	bromodomain containing 2
GO:0006334	538541	TSPYL1	TSPY like 1
GO:0010468	281814	HIF1A	hypoxia inducible factor 1 subunit alpha
GO:0010468	505025	ID2	inhibitor of DNA binding 2
GO:0010468	515723	STK40	serine/threonine kinase 40
GO:0010468	282382	TGFBR1	transforming growth factor beta receptor 1
GO:0010468	540892	DNM1L	dynamin 1 like
GO:0010468	282637	CDH1	cadherin 1
GO:0010468	282306	PIK3CA	phosphatidylinositol-4,5-bisphosphate 3-kinase catalytic subunit alpha
GO:0006457	616553	PFDN1	prefoldin subunit 1
GO:0006457	281515	TBCD	tubulin folding cofactor D
GO:0006457	514599	GRPEL2	GrpE like 2, mitochondrial
GO:0006457	515580	GRPEL1	GrpE like 1, mitochondrial
GO:0006457	534182	FKBP9	FKBP prolyl isomerase 9
GO:0006457	506316	DNAJB11	DnaJ heat shock protein family (Hsp40) member B11
GO:0006457	282848	PFDN5	prefoldin subunit 5
GO:0071805	541597	KCNAB2	potassium voltage-gated channel subfamily A regulatory beta subunit 2
GO:0071805	407176	KCNMB1	potassium calcium-activated channel subfamily M regulatory beta subunit 1
GO:0071805	513317	TMEM175	transmembrane protein 175
GO:0071805	535990	KCNB2	potassium voltage-gated channel subfamily B member 2
GO:0071805	282653	AQP1	aquaporin 1
GO:0071805	282573	KCNMA1	potassium calcium-activated channel subfamily M alpha 1
GO:0071805	526133	KCNAB1	potassium voltage-gated channel subfamily A regulatory beta subunit 1
GO:0006413	286870	EIF4G2	eukaryotic translation initiation factor 4 gamma 2
GO:0006413	509764	EIF1	eukaryotic translation initiation factor 1
GO:0006413	286811	EIF6	eukaryotic translation initiation factor 6
GO:0006413	514449	EIF3L	eukaryotic translation initiation factor 3 subunit L
GO:0006413	286819	EIF4A2	eukaryotic translation initiation factor 4A2
GO:0006413	615695	EIF3G	eukaryotic translation initiation factor 3 subunit G
GO:0006413	789999	EIF3B	eukaryotic translation initiation factor 3 subunit B
GO:0046718	281105	CTSB	cathepsin B
GO:0046718	515397	HYAL1	hyaluronidase 1
GO:0046718	414922	CLDN1	claudin 1
GO:0046718	530409	PHB	prohibitin
GO:0046718	505097	SMPD1	sphingomyelin phosphodiesterase 1
GO:0046718	281876	ITGB1	integrin subunit beta 1
GO:0007179	282382	TGFBR1	transforming growth factor beta receptor 1
GO:0007179	281542	TP53	tumor protein p53
GO:0007179	540248	SMAD4	SMAD family member 4
GO:0007179	282188	COL1A2	collagen type I alpha 2 chain
GO:0007179	534069	TGFB2	transforming growth factor beta 2
GO:0007179	338068	ACVR1	activin A receptor type 1
GO:0033138	511268	PARK7	Parkinsonism associated deglycase
GO:0033138	539090	SPRY2	sprouty RTK signaling antagonist 2
GO:0033138	282306	PIK3CA	phosphatidylinositol-4,5-bisphosphate 3-kinase catalytic subunit alpha
GO:0033138	536537	CNOT9	CCR4-NOT transcription complex subunit 9
GO:0033138	521196	RAF1	Raf-1 proto-oncogene, serine/threonine kinase
GO:0033138	280826	IL6	interleukin 6
GO:0033138	281040	CAV1	caveolin 1
[truncated: 263 more rows]

## Sheet: GO-CC
Gene Set Name	Description	Genes in Gene Set	Genes in Overlap	P-value	FDR
GO:0005886	plasma membrane	477	169	1.46318e-57	2.04845e-55
GO:0005654	nucleoplasm	366	145	1.22104e-56	8.54727e-55
GO:0005739	mitochondrion	255	105	3.12164e-43	1.45677e-41
GO:0005743	mitochondrial inner membrane	186	79	4.98011e-34	1.74304e-32
GO:0005789	endoplasmic reticulum membrane	222	83	6.92205e-31	1.93818e-29
GO:0005783	endoplasmic reticulum	188	73	1.45292e-28	3.39015e-27
GO:0005813	centrosome	90	43	1.15184e-21	2.30369e-20
GO:0048471	perinuclear region of cytoplasm	165	59	2.90523e-21	5.08416e-20
GO:0000139	Golgi membrane	132	52	4.05065e-21	6.30102e-20
GO:0016020	membrane	149	55	1.1286e-20	1.58004e-19
GO:0005730	nucleolus	165	57	9.0829e-20	1.15601e-18
GO:0005794	Golgi apparatus	177	59	1.53352e-19	1.78911e-18
GO:0005759	mitochondrial matrix	104	41	5.53545e-17	5.96125e-16
GO:0005764	lysosome	79	35	1.30672e-16	1.30672e-15
GO:0005763	mitochondrial small ribosomal subunit	47	26	1.12719e-15	1.05205e-14
GO:0005576	extracellular region	270	68	3.76413e-15	3.29362e-14
GO:0005747	mitochondrial respiratory chain complex I	49	26	4.37747e-15	3.60497e-14
GO:0016607	nuclear speck	98	35	3.3055e-13	2.57095e-12
GO:0030496	midbody	62	27	6.36561e-13	4.69045e-12
GO:0042470	melanosome	51	24	1.51231e-12	1.05862e-11
GO:0032991	protein-containing complex	83	31	1.84223e-12	1.22815e-11
GO:0005762	mitochondrial large ribosomal subunit	43	21	1.52712e-11	9.71804e-11
GO:0005615	extracellular space	213	52	2.14131e-11	1.30341e-10
GO:0005768	endosome	56	23	1.3698e-10	7.99049e-10
GO:0009986	cell surface	66	25	1.75859e-10	9.46933e-10
GO:0045202	synapse	66	25	1.75859e-10	9.46933e-10
GO:0005925	focal adhesion	38	18	8.21047e-10	4.25728e-09
GO:0005765	lysosomal membrane	66	24	1.07632e-09	5.38161e-09
GO:0005856	cytoskeleton	82	27	1.30087e-09	6.28005e-09
GO:0030176	integral component of endoplasmic reticulum membrane	31	16	1.43524e-09	6.69778e-09
GO:0005694	chromosome	49	20	2.47439e-09	1.11747e-08
GO:0042995	cell projection	36	17	2.57602e-09	1.12701e-08
GO:0035861	site of double-strand break	25	14	3.7924e-09	1.6089e-08
GO:0005901	caveola	26	14	7.53216e-09	3.01286e-08
GO:0000785	chromatin	26	14	7.53216e-09	3.01286e-08
GO:0030424	axon	53	20	1.24253e-08	4.83206e-08
GO:0005815	microtubule organizing center	35	16	1.36541e-08	5.1664e-08
GO:0015629	actin cytoskeleton	20	12	1.74328e-08	6.42263e-08
GO:0031965	nuclear membrane	45	18	2.26356e-08	8.1256e-08
GO:0045121	membrane raft	50	19	2.50643e-08	8.77249e-08
GO:0005788	endoplasmic reticulum lumen	28	14	2.62935e-08	8.97828e-08
GO:0030054	cell junction	33	15	4.27481e-08	1.42494e-07
GO:0031902	late endosome membrane	38	16	5.75203e-08	1.87275e-07
GO:0033116	endoplasmic reticulum-Golgi intermediate compartment membrane	15	10	6.72766e-08	2.14062e-07
GO:0005814	centriole	35	15	1.1245e-07	3.49846e-07
GO:0005887	integral component of plasma membrane	94	26	1.45049e-07	4.41452e-07
GO:0030027	lamellipodium	45	17	1.4994e-07	4.4663e-07
GO:0001650	fibrillar center	16	10	1.6482e-07	4.79691e-07
GO:0016324	apical plasma membrane	66	21	1.67892e-07	4.79691e-07
GO:0031901	early endosome membrane	41	16	2.05082e-07	5.74229e-07
GO:0032580	Golgi cisterna membrane	20	11	2.3904e-07	6.56188e-07
GO:0005929	cilium	52	18	3.04117e-07	8.18777e-07
GO:0005874	microtubule	63	20	3.42227e-07	9.03997e-07
GO:0000781	chromosome, telomeric region	25	12	4.68253e-07	1.21399e-06
GO:0030659	cytoplasmic vesicle membrane	49	17	6.22267e-07	1.58395e-06
GO:0042383	sarcolemma	30	13	6.80011e-07	1.70003e-06
GO:0005753	mitochondrial proton-transporting ATP synthase complex	22	11	8.46515e-07	2.07916e-06
GO:0043005	neuron projection	40	15	9.01254e-07	2.17544e-06
GO:0016323	basolateral plasma membrane	46	16	1.27495e-06	3.02529e-06
GO:0005938	cell cortex	27	12	1.31857e-06	3.07665e-06
GO:0005769	early endosome	53	17	2.18003e-06	5.00335e-06
GO:0005819	spindle	38	14	2.66333e-06	6.01397e-06
GO:0016604	nuclear body	34	13	3.73342e-06	8.29648e-06
GO:0005839	proteasome core complex	17	9	4.73992e-06	1.00888e-05
GO:0000932	P-body	21	10	4.75614e-06	1.00888e-05
GO:0070062	extracellular exosome	17	9	4.73992e-06	1.00888e-05
GO:0000922	spindle pole	31	12	7.60048e-06	1.58816e-05
GO:0005811	lipid droplet	27	11	1.02247e-05	2.10508e-05
GO:0010008	endosome membrane	38	13	1.54481e-05	3.08962e-05
GO:0032587	ruffle membrane	19	9	1.52397e-05	3.08962e-05
GO:0031966	mitochondrial membrane	30	11	3.3216e-05	6.54964e-05
GO:0005741	mitochondrial outer membrane	41	13	3.88657e-05	7.55723e-05
GO:0043231	intracellular membrane-bounded organelle	21	9	4.10414e-05	7.76459e-05
GO:0032154	cleavage furrow	21	9	4.10414e-05	7.76459e-05
GO:0043204	perikaryon	31	11	4.73046e-05	8.83019e-05
GO:0005802	trans-Golgi network	27	10	6.86503e-05	0.000126461
GO:0044297	cell body	18	8	8.13252e-05	0.000147864
GO:0005912	adherens junction	19	8	0.000129387	0.000232234
GO:0005758	mitochondrial intermembrane space	29	10	0.000137825	0.000244247
GO:0030426	growth cone	24	9	0.000142255	0.000245873
GO:0016363	nuclear matrix	24	9	0.000142255	0.000245873
GO:0045177	apical part of cell	15	7	0.000158809	0.000271137
GO:0031410	cytoplasmic vesicle	66	16	0.000193815	0.000326917
GO:1990904	ribonucleoprotein complex	20	8	0.000198652	0.000327192
GO:0010494	cytoplasmic stress granule	20	8	0.000198652	0.000327192
GO:0098978	glutamatergic synapse	25	9	0.000204573	0.000333026
GO:0045335	phagocytic vesicle	16	7	0.000260392	0.000419021
GO:0030175	filopodium	21	8	0.000295643	0.000465057
GO:0072686	mitotic spindle	21	8	0.000295643	0.000465057
GO:0009897	external side of plasma membrane	22	8	0.000428064	0.000665877
GO:0000777	condensed chromosome kinetochore	33	10	0.000455838	0.000693666
GO:0043025	neuronal cell body	33	10	0.000455838	0.000693666
GO:0005777	peroxisome	28	9	0.000539509	0.000812164
GO:0045171	intercellular bridge	18	7	0.000616419	0.000880599
GO:0005575	cellular_component	23	8	0.000604839	0.000880599
GO:0005923	bicellular tight junction	23	8	0.000604839	0.000880599
GO:0016605	PML body	18	7	0.000616419	0.000880599
GO:0042645	mitochondrial nucleoid	18	7	0.000616419	0.000880599
GO:0001726	ruffle	19	7	0.000900521	0.00126073
GO:0055038	recycling endosome membrane	19	7	0.000900521	0.00126073
GO:0030425	dendrite	49	12	0.00107739	0.00149341
GO:0062023	collagen-containing extracellular matrix	25	8	0.00113334	0.00155556
GO:0036064	ciliary basal body	38	10	0.0015355	0.00208709
GO:0005930	axoneme	16	6	0.00190714	0.0025673
GO:0005681	spliceosomal complex	22	7	0.00239602	0.0031947
GO:0098793	presynapse	28	8	0.00255199	0.00337055
GO:0030658	transport vesicle membrane	17	6	0.00272467	0.00356499
GO:1904115	axon cytoplasm	18	6	0.0037788	0.00489844
GO:0005770	late endosome	30	8	0.004087	0.00524936
GO:0034707	chloride channel complex	19	6	0.00510723	0.00650011
GO:0031012	extracellular matrix	26	7	0.00671818	0.00847338
GO:0019005	SCF ubiquitin ligase complex	15	5	0.00816241	0.010203
GO:0008021	synaptic vesicle	21	6	0.00873945	0.0108276
GO:0031594	neuromuscular junction	16	5	0.0110057	0.0135158
GO:0014069	postsynaptic density	23	6	0.0139201	0.0169462
GO:0030133	transport vesicle	18	5	0.0185628	0.0222119
GO:0005902	microvillus	18	5	0.0185628	0.0222119
GO:0055037	recycling endosome	26	6	0.0251867	0.0298825
GO:0001917	photoreceptor inner segment	21	5	0.0352113	0.0414251
GO:0071007	U2-type catalytic step 2 spliceosome	15	4	0.0398007	0.0464342

## Sheet: GO-CC_detail
Gene Set Name	Gene Id	Gene Symbol	Description
GO:0005886	539920	LY6G6F	lymphocyte antigen 6 family member G6F
GO:0005886	534560	TMEM150C	transmembrane protein 150C
GO:0005886	780881	ARHGEF39	Rho guanine nucleotide exchange factor 39
GO:0005886	511908	EHD1	EH domain containing 1
GO:0005886	513828	TBC1D2	TBC1 domain family member 2
GO:0005886	538735	HYLS1	HYLS1 centriolar and ciliogenesis associated
GO:0005886	282147	ATP6V1A	ATPase H+ transporting V1 subunit A
GO:0005886	782472	CGAS	cyclic GMP-AMP synthase
GO:0005886	506895	HAX1	HCLS1 associated protein X-1
GO:0005886	282356	SLC2A1	solute carrier family 2 member 1
GO:0005886	529761	TMED10	transmembrane p24 trafficking protein 10
GO:0005886	286886	GOT2	glutamic-oxaloacetic transaminase 2
GO:0005886	281801	GRK5	G protein-coupled receptor kinase 5
GO:0005886	615869	TRIP6	thyroid hormone receptor interactor 6
GO:0005886	540841	SLC10A6	solute carrier family 10 (sodium/bile acid cotransporter), member 6
GO:0005886	404122	ACTG1	actin gamma 1
GO:0005886	286810	PTPRN	protein tyrosine phosphatase receptor type N
GO:0005886	541274	DNAJB4	DnaJ heat shock protein family (Hsp40) member B4
GO:0005886	282637	CDH1	cadherin 1
GO:0005886	521196	RAF1	Raf-1 proto-oncogene, serine/threonine kinase
GO:0005886	514541	RAB13	RAB13, member RAS oncogene family
GO:0005886	530409	PHB	prohibitin
GO:0005886	505097	SMPD1	sphingomyelin phosphodiesterase 1
GO:0005886	510998	MPP1	membrane palmitoylated protein 1
GO:0005886	534965	TES	testin LIM domain protein
GO:0005886	515363	PHB2	prohibitin 2
GO:0005886	100125302	TMEM8B	transmembrane protein 8B
GO:0005886	281653	CABP1	calcium binding protein 1
GO:0005886	526950	UBL3	ubiquitin like 3
GO:0005886	282126	YWHAH	tyrosine 3-monooxygenase/tryptophan 5-monooxygenase activation protein eta
GO:0005886	540194	KANSL2	KAT8 regulatory NSL complex subunit 2
GO:0005886	286842	BASP1	brain abundant membrane attached signal protein 1
GO:0005886	280737	BTC	betacellulin
GO:0005886	281452	RGS7	regulator of G protein signaling 7
GO:0005886	282140	ANGPT1	angiopoietin 1
GO:0005886	281696	CLIC5	chloride intracellular channel 5
GO:0005886	404189	NME1	non-metastatic cells 1, protein (NM23A) expressed in
GO:0005886	523894	ARL14EP	ADP ribosylation factor like GTPase 14 effector protein
GO:0005886	519937	AJUBA	ajuba LIM protein
GO:0005886	282330	PTGER3	prostaglandin E receptor 3
GO:0005886	282463	PRKAR2B	protein kinase cAMP-dependent type II regulatory subunit beta
GO:0005886	512082	PIK3IP1	phosphoinositide-3-kinase interacting protein 1
GO:0005886	280991	AKT1	AKT serine/threonine kinase 1
GO:0005886	534217	AIFM2	apoptosis inducing factor mitochondria associated 2
GO:0005886	515016	MTUS1	microtubule associated scaffold protein 1
GO:0005886	504499	NDRG1	N-myc downstream regulated 1
GO:0005886	781044	RHOU	ras homolog family member U
GO:0005886	515646	CLIC1	chloride intracellular channel 1
GO:0005886	281733	CXADR	CXADR Ig-like cell adhesion molecule
GO:0005886	508042	USP4	ubiquitin specific peptidase 4
GO:0005886	317654	SLC9A1	solute carrier family 9 member A1
GO:0005886	507185	SLC51B	solute carrier family 51 subunit beta
GO:0005886	508269	TMEM106A	transmembrane protein 106A
GO:0005886	415113	HSPA5	heat shock protein family A (Hsp70) member 5
GO:0005886	615681	SLC39A11	solute carrier family 39 member 11
GO:0005886	505735	SEZ6L2	seizure related 6 homolog like 2
GO:0005886	511955	SLC43A2	solute carrier family 43 member 2
GO:0005886	338036	P2RX4	purinergic receptor P2X 4
GO:0005886	513445	TMEM98	transmembrane protein 98
GO:0005886	534816	STIM1	stromal interaction molecule 1
GO:0005886	281885	KITLG	KIT ligand
GO:0005886	526585	F2R	coagulation factor II thrombin receptor
GO:0005886	518407	NAPA	NSF attachment protein alpha
GO:0005886	281062	CDH2	cadherin 2
GO:0005886	515854	SGK1	serum/glucocorticoid regulated kinase 1
GO:0005886	618278	COMT	catechol-O-methyltransferase
GO:0005886	505379	VAMP3	vesicle associated membrane protein 3
GO:0005886	526525	F2RL1	F2R like trypsin receptor 1
GO:0005886	512662	CHP1	calcineurin like EF-hand protein 1
GO:0005886	535038	TMEM147	transmembrane protein 147
GO:0005886	281057	CD44	CD44 molecule
GO:0005886	504813	NPY1R	neuropeptide Y receptor Y1
GO:0005886	507430	NIPA2	NIPA magnesium transporter 2
GO:0005886	281357	NPR2	natriuretic peptide receptor 2
GO:0005886	520173	TMEM120A	transmembrane protein 120A
GO:0005886	530879	PLEKHA2	pleckstrin homology domain containing A2
GO:0005886	527631	PLA2G3	phospholipase A2 group III
GO:0005886	281542	TP53	tumor protein p53
GO:0005886	526544	NCS1	neuronal calcium sensor 1
GO:0005886	507007	NUBP1	nucleotide binding protein 1
GO:0005886	281363	NT5E	5'-nucleotidase ecto
GO:0005886	534212	NCEH1	neutral cholesterol ester hydrolase 1
GO:0005886	281799	GPR68	G protein-coupled receptor 68
GO:0005886	614849	LAMTOR1	late endosomal/lysosomal adaptor, MAPK and MTOR activator 1
GO:0005886	510684	PPIP5K1	diphosphoinositol pentakisphosphate kinase 1
GO:0005886	613987	TMEM100	transmembrane protein 100
GO:0005886	616753	CISH	cytokine inducible SH2 containing protein
GO:0005886	519729	ADRM1	ADRM1 26S proteasome ubiquitin receptor
GO:0005886	508157	DYSF	dysferlin
GO:0005886	617775	PTOV1	PTOV1 extended AT-hook containing adaptor protein
GO:0005886	508631	VMP1	vacuole membrane protein 1
GO:0005886	280746	CD9	CD9 molecule
GO:0005886	282353	SLC1A1	solute carrier family 1 member 1
GO:0005886	511268	PARK7	Parkinsonism associated deglycase
GO:0005886	510141	CIB1	calcium and integrin binding 1
GO:0005886	526612	NSFL1C	NSFL1 cofactor
GO:0005886	407209	SGCE	sarcoglycan epsilon
GO:0005886	506343	ATIC	5-aminoimidazole-4-carboxamide ribonucleotide formyltransferase/IMP cyclohydrolase
GO:0005886	767919	AAMP	angio associated migratory cell protein
GO:0005886	511378	TMEM97	transmembrane protein 97
GO:0005886	282514	PAFAH1B2	platelet activating factor acetylhydrolase 1b catalytic subunit 2
GO:0005886	507751	SNX15	sorting nexin 15
GO:0005886	614242	RAB8B	RAB8B, member RAS oncogene family
GO:0005886	618785	VPS28	VPS28 subunit of ESCRT-I
GO:0005886	282382	TGFBR1	transforming growth factor beta receptor 1
GO:0005886	281749	EDNRA	endothelin receptor type A
GO:0005886	538829	PPP1CB	protein phosphatase 1 catalytic subunit beta
GO:0005886	539003	CTNNB1	catenin beta 1
GO:0005886	282527	TNFRSF1A	TNF receptor superfamily member 1A
GO:0005886	404155	LAPTM4B	lysosomal protein transmembrane 4 beta
GO:0005886	507667	EMP2	epithelial membrane protein 2
GO:0005886	505009	CPTP	ceramide-1-phosphate transfer protein
GO:0005886	281873	ITGA5	integrin subunit alpha 5
GO:0005886	337925	SLC8A1	solute carrier family 8 member A1
GO:0005886	767901	RNF146	ring finger protein 146
GO:0005886	282573	KCNMA1	potassium calcium-activated channel subfamily M alpha 1
GO:0005886	540287	GPR183	G protein-coupled receptor 183
GO:0005886	282653	AQP1	aquaporin 1
GO:0005886	281536	TLR4	toll like receptor 4
GO:0005886	510781	JOSD1	Josephin domain containing 1
GO:0005886	540398	PPP4C	protein phosphatase 4 catalytic subunit
GO:0005886	539959	ITM2C	integral membrane protein 2C
GO:0005886	538730	NRN1	neuritin 1
GO:0005886	767906	ARL4A	ADP ribosylation factor like GTPase 4A
GO:0005886	533661	STING1	stimulator of interferon response cGAMP interactor 1
GO:0005886	512506	RANGRF	RAN guanine nucleotide release factor
GO:0005886	519463	NEDD1	NEDD1 gamma-tubulin ring complex targeting factor
GO:0005886	615552	MGST2	microsomal glutathione S-transferase 2
GO:0005886	510778	CCDC124	coiled-coil domain containing 124
GO:0005886	282862	BCAM	basal cell adhesion molecule
GO:0005886	788252	ADGRL1	adhesion G protein-coupled receptor L1
GO:0005886	338082	ATP6V1B2	ATPase H+ transporting V1 subunit B2
GO:0005886	535990	KCNB2	potassium voltage-gated channel subfamily B member 2
GO:0005886	281141	ENO1	enolase 1
GO:0005886	533720	SWAP70	switching B cell complex subunit SWAP70
GO:0005886	616278	ERLIN2	ER lipid raft associated 2
GO:0005886	618691	PHPT1	phosphohistidine phosphatase 1
GO:0005886	504545	PLPP2	phospholipid phosphatase 2
GO:0005886	281258	F11R	F11 receptor
GO:0005886	538685	ITPRIP	inositol 1,4,5-trisphosphate receptor interacting protein
GO:0005886	280979	ACTB	actin beta
GO:0005886	516375	STRN3	striatin 3
GO:0005886	527140	CALCRL	calcitonin receptor like receptor
GO:0005886	505554	NEU1	neuraminidase 1
GO:0005886	616641	PIP4P2	phosphatidylinositol-4,5-bisphosphate 4-phosphatase 2
GO:0005886	515680	NFX1	nuclear transcription factor, X-box binding 1
GO:0005886	507921	MFSD5	major facilitator superfamily domain containing 5
GO:0005886	282113	UPK1B	uroplakin 1B
GO:0005886	282144	ATP1A1	ATPase Na+/K+ transporting subunit alpha 1
GO:0005886	506622	TMEM219	transmembrane protein 219
GO:0005886	529002	TBC1D24	TBC1 domain family member 24
GO:0005886	509977	ARL6IP5	ADP ribosylation factor like GTPase 6 interacting protein 5
GO:0005886	538583	ENPP4	ectonucleotide pyrophosphatase/phosphodiesterase 4
GO:0005886	281661	CAPN1	calpain 1
GO:0005886	535533	COPB1	COPI coat complex subunit beta 1
GO:0005886	338089	ATP6V1C1	ATPase H+ transporting V1 subunit C1
GO:0005886	509107	ATF4	activating transcription factor 4
GO:0005886	317777	PLA2R1	phospholipase A2 receptor 1
GO:0005886	505679	S100A16	S100 calcium binding protein A16
GO:0005886	317756	GPBAR1	G protein-coupled bile acid receptor 1
GO:0005886	282216	DNAJC5	DnaJ heat shock protein family (Hsp40) member C5
GO:0005886	513094	LAMP5	lysosomal associated membrane protein family member 5
GO:0005886	541164	TMEM47	transmembrane protein 47
GO:0005886	280752	CNP	2',3'-cyclic nucleotide 3' phosphodiesterase
GO:0005886	281374	FURIN	furin, paired basic amino acid cleaving enzyme
GO:0005886	511435	CD81	CD81 molecule
GO:0005886	529146	MAP3K7	mitogen-activated protein kinase kinase kinase 7
GO:0005654	528209	WDR12	WD repeat domain 12
GO:0005654	539764	RAB5A	RAB5A, member RAS oncogene family
GO:0005654	541291	NAPEPLD	N-acyl phosphatidylethanolamine phospholipase D
GO:0005654	509871	NMD3	NMD3 ribosome export adaptor
GO:0005654	515503	PSMA1	proteasome 20S subunit alpha 1
GO:0005654	616545	SKAP2	src kinase associated phosphoprotein 2
GO:0005654	768231	CPSF6	cleavage and polyadenylation specific factor 6
GO:0005654	615637	ERCC1	ERCC excision repair 1, endonuclease non-catalytic subunit
GO:0005654	539774	PHF23	PHD finger protein 23
GO:0005654	538465	TRIB3	tribbles pseudokinase 3
GO:0005654	513878	BUD23	BUD23 rRNA methyltransferase and ribosome maturation factor
GO:0005654	538540	CLINT1	clathrin interactor 1
GO:0005654	511417	SHOC2	SHOC2 leucine rich repeat scaffold protein
GO:0005654	282388	TXNRD1	thioredoxin reductase 1
GO:0005654	534216	RBM5	RNA binding motif protein 5
GO:0005654	509598	NIFK	nucleolar protein interacting with the FHA domain of MKI67
GO:0005654	509620	CMTR1	cap methyltransferase 1
GO:0005654	537946	CDH6	cadherin 6
GO:0005654	514863	MCMBP	minichromosome maintenance complex binding protein
GO:0005654	511610	SURF6	surfeit 6
GO:0005654	540966	RAD21	RAD21 cohesin complex component
GO:0005654	505570	GID8	GID complex subunit 8 homolog
GO:0005654	510538	ASF1B	anti-silencing function 1B histone chaperone
GO:0005654	282224	ETAA1	ETAA1 activator of ATR kinase
GO:0005654	281061	CDK1	cyclin dependent kinase 1
GO:0005654	617407	COPS9	COP9 signalosome subunit 9
GO:0005654	540969	DNA2	DNA replication helicase/nuclease 2
GO:0005654	528135	HNRNPK	heterogeneous nuclear ribonucleoprotein K
GO:0005654	504876	RPL23	ribosomal protein L23
GO:0005654	286797	CERT1	ceramide transporter 1
GO:0005654	516375	STRN3	striatin 3
GO:0005654	534640	PSMB5	proteasome 20S subunit beta 5
GO:0005654	515680	NFX1	nuclear transcription factor, X-box binding 1
GO:0005654	540398	PPP4C	protein phosphatase 4 catalytic subunit
GO:0005654	533147	PPP2R3C	protein phosphatase 2 regulatory subunit B''gamma
GO:0005654	539846	ZBED8	zinc finger BED-type containing 8
GO:0005654	767906	ARL4A	ADP ribosylation factor like GTPase 4A
GO:0005654	530411	UHRF1	ubiquitin like with PHD and ring finger domains 1
GO:0005654	539771	SMUG1	single-strand-selective monofunctional uracil-DNA glycosylase 1
GO:0005654	508005	EXOSC9	exosome component 9
GO:0005654	533661	STING1	stimulator of interferon response cGAMP interactor 1
GO:0005654	281564	UGDH	UDP-glucose 6-dehydrogenase
GO:0005654	512745	RPL11	ribosomal protein L11
GO:0005654	509943	TSN	translin
GO:0005654	539547	HES1	hes family bHLH transcription factor 1
GO:0005654	767901	RNF146	ring finger protein 146
GO:0005654	510244	CDKN2D	cyclin dependent kinase inhibitor 2D
GO:0005654	404165	NOP56	NOP56 ribonucleoprotein
GO:0005654	781648	LAP3	leucine aminopeptidase 3
GO:0005654	510809	MIS18A	MIS18 kinetochore protein A
GO:0005654	515723	STK40	serine/threonine kinase 40
GO:0005654	519463	NEDD1	NEDD1 gamma-tubulin ring complex targeting factor
GO:0005654	514460	PTPA	protein phosphatase 2 phosphatase activator
GO:0005654	514128	BYSL	bystin like
GO:0005654	538426	DNAJB1	DnaJ heat shock protein family (Hsp40) member B1
GO:0005654	513237	SBDS	SBDS ribosome maturation factor
GO:0005654	282110	UCHL5	ubiquitin C-terminal hydrolase L5
GO:0005654	510029	PSMC4	proteasome 26S subunit, ATPase 4
GO:0005654	505284	CENPH	centromere protein H
GO:0005654	614276	MED10	mediator complex subunit 10
GO:0005654	529336	TNFAIP8	TNF alpha induced protein 8
GO:0005654	509725	DIMT1	DIMT1 rRNA methyltransferase and ribosome maturation factor
GO:0005654	526612	NSFL1C	NSFL1 cofactor
GO:0005654	506203	PSMB4	proteasome 20S subunit beta 4
GO:0005654	538829	PPP1CB	protein phosphatase 1 catalytic subunit beta
GO:0005654	508343	JMJD6	jumonji domain containing 6, arginine demethylase and lysine hydroxylase
GO:0005654	767836	PNRC2	proline rich nuclear receptor coactivator 2
GO:0005654	617914	MAFF	MAF bZIP transcription factor F
GO:0005654	281937	MYO1C	myosin IC
GO:0005654	515580	GRPEL1	GrpE like 1, mitochondrial
GO:0005654	532684	LOXL2	lysyl oxidase like 2
GO:0005654	530642	DCK	deoxycytidine kinase
GO:0005654	506676	UBXN1	UBX domain protein 1
GO:0005654	509139	ANKRD37	ankyrin repeat domain 37
GO:0005654	528390	NR4A1	nuclear receptor subfamily 4 group A member 1
GO:0005654	515310	DUSP6	dual specificity phosphatase 6
GO:0005654	360193	PNO1	partner of NOB1 homolog
GO:0005654	512830	RNASEH2A	ribonuclease H2 subunit A
GO:0005654	509273	FAHD1	fumarylacetoacetate hydrolase domain containing 1
GO:0005654	531706	USP33	ubiquitin specific peptidase 33
GO:0005654	538718	PNMA1	PNMA family member 1
GO:0005654	512993	WDR77	WD repeat domain 77
GO:0005654	510376	ANKRD1	ankyrin repeat domain 1
GO:0005654	789613	SMARCD2	SWI/SNF related, matrix associated, actin dependent regulator of chromatin, subfamily d, member 2
GO:0005654	523609	PRELID1	PRELI domain containing 1
GO:0005654	519513	BRCC3	BRCA1/BRCA2-containing complex subunit 3
GO:0005654	281630	APEX1	apurinic/apyrimidinic endodeoxyribonuclease 1
GO:0005654	519729	ADRM1	ADRM1 26S proteasome ubiquitin receptor
GO:0005654	516919	PSMB2	proteasome 20S subunit beta 2
GO:0005654	281115	DHX9	DExH-box helicase 9
GO:0005654	616242	FEN1	flap structure-specific endonuclease 1
GO:0005654	512626	CNDP2	carnosine dipeptidase 2
GO:0005654	533953	IRAK1	interleukin 1 receptor associated kinase 1
GO:0005654	281945	NR2F2	nuclear receptor subfamily 2 group F member 2
GO:0005654	521522	PEX19	peroxisomal biogenesis factor 19
GO:0005654	337890	RPL26	ribosomal protein L26
GO:0005654	507245	ECSIT	ECSIT signaling integrator
GO:0005654	540228	PRMT6	protein arginine methyltransferase 6
GO:0005654	281206	GOT1	glutamic-oxaloacetic transaminase 1
GO:0005654	618428	CACYBP	calcyclin binding protein
GO:0005654	615215	MAPKAPK3	MAPK activated protein kinase 3
GO:0005654	533115	MSH2	mutS homolog 2
GO:0005654	513545	CLCN7	chloride voltage-gated channel 7
GO:0005654	511951	DDB1	damage specific DNA binding protein 1
GO:0005654	514579	ALKBH3	alkB homolog 3, alpha-ketoglutarate dependent dioxygenase
GO:0005654	507486	SHQ1	SHQ1, H/ACA ribonucleoprotein assembly factor
GO:0005654	614893	CDCA7	cell division cycle associated 7
GO:0005654	281160	FGF1	fibroblast growth factor 1
GO:0005654	516337	POLR1C	RNA polymerase I and III subunit C
GO:0005654	509365	TATDN1	TatD DNase domain containing 1
GO:0005654	618292	EXOSC4	exosome component 4
GO:0005654	524749	MINDY2	MINDY lysine 48 deubiquitinase 2
GO:0005654	538509	MINDY3	MINDY lysine 48 deubiquitinase 3
GO:0005654	508684	NR2C2AP	nuclear receptor 2C2 associated protein
GO:0005654	514449	EIF3L	eukaryotic translation initiation factor 3 subunit L
GO:0005654	508794	DNM1	dynamin 1
GO:0005654	541274	DNAJB4	DnaJ heat shock protein family (Hsp40) member B4
GO:0005654	540739	GRWD1	glutamate rich WD repeat containing 1
GO:0005654	510069	PSMB6	proteasome 20S subunit beta 6
GO:0005654	530409	PHB	prohibitin
GO:0005654	511612	SEPTIN2	septin 2
GO:0005654	504523	ZPR1	ZPR1 zinc finger
GO:0005654	527854	KIF20A	kinesin family member 20A
GO:0005654	534628	NMRAL1	NmrA like redox sensor 1
GO:0005654	523894	ARL14EP	ADP ribosylation factor like GTPase 14 effector protein
GO:0005654	505499	CLK3	CDC like kinase 3
GO:0005654	509108	RPS19BP1	ribosomal protein S19 binding protein 1
GO:0005654	515380	EDF1	endothelial differentiation related factor 1
GO:0005654	404188	NDUFA9	NADH:ubiquinone oxidoreductase subunit A9
GO:0005654	538541	TSPYL1	TSPY like 1
GO:0005654	513828	TBC1D2	TBC1 domain family member 2
GO:0005654	533865	MED25	mediator complex subunit 25
GO:0005654	282011	PSIP1	PC4 and SFRS1 interacting protein 1
GO:0005654	506149	SMDT1	single-pass membrane protein with aspartate rich tail 1
GO:0005654	516004	MRPS26	mitochondrial ribosomal protein S26
GO:0005654	768207	SS18L1	SS18L1 subunit of BAF chromatin remodeling complex
GO:0005654	507165	HSPH1	heat shock protein family H (Hsp110) member 1
GO:0005654	507472	DRG2	developmentally regulated GTP binding protein 2
GO:0005654	533842	NABP2	nucleic acid binding protein 2
GO:0005654	540444	HMGB2	high mobility group box 2
GO:0005654	535119	CIAPIN1	cytokine induced apoptosis inhibitor 1
GO:0005654	407149	FYTTD1	forty-two-three domain containing 1
GO:0005654	504437	AURKA	aurora kinase A
GO:0005654	520800	TFE3	transcription factor binding to IGHM enhancer 3
GO:0005654	505710	MIEN1	migration and invasion enhancer 1
GO:0005739	507686	SLC25A29	solute carrier family 25 member 29
GO:0005739	506895	HAX1	HCLS1 associated protein X-1
GO:0005739	281832	HSP90AA1	heat shock protein 90 alpha family class A member 1
GO:0005739	281157	FDX1	ferredoxin 1
GO:0005739	529235	DDIT4	DNA damage inducible transcript 4
GO:0005739	515465	MRPL58	mitochondrial ribosomal protein L58
GO:0005739	512913	IFI6	interferon alpha inducible protein 6
GO:0005739	509583	DHX36	DEAH-box helicase 36
GO:0005739	286886	GOT2	glutamic-oxaloacetic transaminase 2
GO:0005739	100125302	TMEM8B	transmembrane protein 8B
GO:0005739	282523	SLC25A11	solute carrier family 25 member 11
GO:0005739	530409	PHB	prohibitin
GO:0005739	281833	HSPE1	heat shock protein family E (Hsp10) member 1
GO:0005739	521196	RAF1	Raf-1 proto-oncogene, serine/threonine kinase
GO:0005739	281080	CLTC	clathrin heavy chain
GO:0005739	615342	BNIP3	BCL2 interacting protein 3
GO:0005739	280976	ACO2	aconitase 2
GO:0005739	536925	COQ8A	coenzyme Q8A
GO:0005739	281312	MSRA	methionine sulfoxide reductase A
GO:0005739	281480	SDHA	succinate dehydrogenase complex flavoprotein subunit A
GO:0005739	616242	FEN1	flap structure-specific endonuclease 1
GO:0005739	515016	MTUS1	microtubule associated scaffold protein 1
GO:0005739	615007	TUSC3	tumor suppressor candidate 3
GO:0005739	515646	CLIC1	chloride intracellular channel 1
GO:0005739	507347	SIRT5	sirtuin 5
GO:0005739	767855	TBRG4	transforming growth factor beta regulator 4
GO:0005739	508473	SFXN4	sideroflexin 4
GO:0005739	507245	ECSIT	ECSIT signaling integrator
GO:0005739	515854	SGK1	serum/glucocorticoid regulated kinase 1
GO:0005739	507631	TYMS	thymidylate synthetase
GO:0005739	514579	ALKBH3	alkB homolog 3, alpha-ketoglutarate dependent dioxygenase
GO:0005739	534615	BNIP3L	BCL2 interacting protein 3 like
GO:0005739	415113	HSPA5	heat shock protein family A (Hsp70) member 5
GO:0005739	512062	YRDC	yrdC N6-threonylcarbamoyltransferase domain containing
GO:0005739	767946	FAM110B	family with sequence similarity 110 member B
GO:0005739	528390	NR4A1	nuclear receptor subfamily 4 group A member 1
GO:0005739	282604	FDXR	ferredoxin reductase
GO:0005739	535203	NTHL1	nth like DNA glycosylase 1
GO:0005739	281542	TP53	tumor protein p53
GO:0005739	281020	BCL2	BCL2 apoptosis regulator
GO:0005739	504199	NIT1	nitrilase 1
GO:0005739	617636	MMAB	metabolism of cobalamin associated B
GO:0005739	509273	FAHD1	fumarylacetoacetate hydrolase domain containing 1
GO:0005739	614069	ENY2	ENY2 transcription and export complex 2 subunit
GO:0005739	767602	AP3B1	adaptor related protein complex 3 subunit beta 1
GO:0005739	281809	HSD17B10	hydroxysteroid 17-beta dehydrogenase 10
GO:0005739	515119	URI1	URI1 prefoldin like chaperone
GO:0005739	540892	DNM1L	dynamin 1 like
GO:0005739	506888	DLST	dihydrolipoamide S-succinyltransferase
GO:0005739	281630	APEX1	apurinic/apyrimidinic endodeoxyribonuclease 1
GO:0005739	327697	NDUFS2	NADH:ubiquinone oxidoreductase core subunit S2
GO:0005739	504987	PYCR2	pyrroline-5-carboxylate reductase 2
GO:0005739	507477	ALDH7A1	aldehyde dehydrogenase 7 family member A1
GO:0005739	618530	ROMO1	reactive oxygen species modulator 1
GO:0005739	511268	PARK7	Parkinsonism associated deglycase
GO:0005739	506203	PSMB4	proteasome 20S subunit beta 4
GO:0005739	507409	YKT6	YKT6 v-SNARE homolog
GO:0005739	540386	DDAH2	dimethylarginine dimethylaminohydrolase 2
GO:0005739	617914	MAFF	MAF bZIP transcription factor F
GO:0005739	338063	NDUFA7	NADH:ubiquinone oxidoreductase subunit A7
GO:0005739	505213	HSDL1	hydroxysteroid dehydrogenase like 1
GO:0005739	509139	ANKRD37	ankyrin repeat domain 37
GO:0005739	514765	ZNF205	zinc finger protein 205
GO:0005739	517535	HSPA9	heat shock protein family A (Hsp70) member 9
GO:0005739	516210	CKB	creatine kinase B
GO:0005739	521864	VPS35	VPS35 retromer complex component
GO:0005739	327699	ATP5IF1	ATP synthase inhibitory factor subunit 1
GO:0005739	404138	PFDN2	prefoldin subunit 2
GO:0005739	512070	ACAD8	acyl-CoA dehydrogenase family member 8
GO:0005739	511755	SFXN3	sideroflexin 3
GO:0005739	617441	COA8	cytochrome c oxidase assembly factor 8
GO:0005739	404151	DYNLL1	dynein light chain LC8-type 1
GO:0005739	781648	LAP3	leucine aminopeptidase 3
GO:0005739	513889	CHCHD4	coiled-coil-helix-coiled-coil-helix domain containing 4
GO:0005739	353301	MECR	mitochondrial trans-2-enoyl-CoA reductase
GO:0005739	280891	PDP1	pyruvate dehydrogenase phosphatase catalytic subunit 1
GO:0005739	504301	ACADSB	acyl-CoA dehydrogenase short/branched chain
GO:0005739	768237	ACSF2	acyl-CoA synthetase family member 2
GO:0005739	281557	TXN2	thioredoxin 2
GO:0005739	280719	AMT	aminomethyltransferase
GO:0005739	282869	UBA1	ubiquitin like modifier activating enzyme 1
GO:0005739	282378	STXBP1	syntaxin binding protein 1
GO:0005739	523885	TMEM135	transmembrane protein 135
GO:0005739	511349	ARL2	ADP ribosylation factor like GTPase 2
GO:0005739	286879	LIPE	lipase E, hormone sensitive type
GO:0005739	767607	DHX30	DExH-box helicase 30
GO:0005739	282477	SLC25A3	solute carrier family 25 member 3
GO:0005739	282120	VDAC2	voltage dependent anion channel 2
GO:0005739	286797	CERT1	ceramide transporter 1
GO:0005739	613462	ARL2BP	ADP ribosylation factor like GTPase 2 binding protein
GO:0005739	529762	TMEM126A	transmembrane protein 126A
GO:0005739	326346	NDUFA11	NADH:ubiquinone oxidoreductase subunit A11
GO:0005739	281785	GLUD1	glutamate dehydrogenase 1
GO:0005739	767586	KANK2	KN motif and ankyrin repeat domains 2
GO:0005739	516979	IRF3	interferon regulatory factor 3
GO:0005739	522006	ACAA2	acetyl-CoA acyltransferase 2
GO:0005739	616965	FAM72A	family with sequence similarity 72 member A
GO:0005739	534599	OGDH	oxoglutarate dehydrogenase
GO:0005739	539606	PYCR1	pyrroline-5-carboxylate reductase 1
GO:0005739	508235	FBXO7	F-box protein 7
GO:0005743	616477	CHCHD3	coiled-coil-helix-coiled-coil-helix domain containing 3
GO:0005743	281480	SDHA	succinate dehydrogenase complex flavoprotein subunit A
GO:0005743	282480	SLC25A6	solute carrier family 25 member 6
GO:0005743	513324	LETM1	leucine zipper and EF-hand containing transmembrane protein 1
GO:0005743	527786	SLC25A25	solute carrier family 25 member 25
GO:0005743	337927	MTCH2	mitochondrial carrier 2
GO:0005743	515363	PHB2	prohibitin 2
GO:0005743	509816	MRPS11	mitochondrial ribosomal protein S11
GO:0005743	510824	MRPS18B	mitochondrial ribosomal protein S18B
GO:0005743	530409	PHB	prohibitin
GO:0005743	282523	SLC25A11	solute carrier family 25 member 11
GO:0005743	618357	MRPS34	mitochondrial ribosomal protein S34
GO:0005743	327696	SDHC	succinate dehydrogenase complex subunit C
GO:0005743	511479	MRPL45	mitochondrial ribosomal protein L45
GO:0005743	286886	GOT2	glutamic-oxaloacetic transaminase 2
GO:0005743	614151	MRPL30	mitochondrial ribosomal protein L30
GO:0005743	512913	IFI6	interferon alpha inducible protein 6
GO:0005743	516004	MRPS26	mitochondrial ribosomal protein S26
GO:0005743	506657	MRPL55	mitochondrial ribosomal protein L55
GO:0005743	282476	SLC25A1	solute carrier family 25 member 1
GO:0005743	507686	SLC25A29	solute carrier family 25 member 29
GO:0005743	510899	MRPS16	mitochondrial ribosomal protein S16
GO:0005743	614070	CIBAR1	CBY1 interacting BAR domain containing 1
GO:0005743	515465	MRPL58	mitochondrial ribosomal protein L58
GO:0005743	505997	SPNS1	sphingolipid transporter 1 (putative)
GO:0005743	506358	MRPL20	mitochondrial ribosomal protein L20
GO:0005743	613835	MRPS36	mitochondrial ribosomal protein S36
GO:0005743	514472	TRAP1	TNF receptor associated protein 1
GO:0005743	504371	SLC25A22	solute carrier family 25 member 22
GO:0005743	282604	FDXR	ferredoxin reductase
GO:0005743	614343	MRPS21	mitochondrial ribosomal protein S21
GO:0005743	507631	TYMS	thymidylate synthetase
GO:0005743	534352	MRPL18	mitochondrial ribosomal protein L18
GO:0005743	510097	FOXRED1	FAD dependent oxidoreductase domain containing 1
GO:0005743	533011	MRPS25	mitochondrial ribosomal protein S25
GO:0005743	615431	MRPS6	mitochondrial ribosomal protein S6
GO:0005743	282478	SLC25A4	solute carrier family 25 member 4
GO:0005743	614102	MRPS18A	mitochondrial ribosomal protein S18A
GO:0005743	507899	MICU1	mitochondrial calcium uptake 1
GO:0005743	504835	MRPL1	mitochondrial ribosomal protein L1
GO:0005743	540278	MRPL35	mitochondrial ribosomal protein L35
GO:0005743	618131	TIMM8B	translocase of inner mitochondrial membrane 8 homolog B
GO:0005743	510219	TOMM40	translocase of outer mitochondrial membrane 40
GO:0005743	618609	MRPL21	mitochondrial ribosomal protein L21
GO:0005743	280719	AMT	aminomethyltransferase
GO:0005743	510127	MRPL37	mitochondrial ribosomal protein L37
GO:0005743	507154	MRPL4	mitochondrial ribosomal protein L4
GO:0005743	510058	MRPL27	mitochondrial ribosomal protein L27
GO:0005743	508216	MRPL28	mitochondrial ribosomal protein L28
GO:0005743	505681	MRPS2	mitochondrial ribosomal protein S2
GO:0005743	282524	SLC25A16	solute carrier family 25 member 16
GO:0005743	513438	MRPS35	mitochondrial ribosomal protein S35
GO:0005743	282479	SLC25A5	solute carrier family 25 member 5
GO:0005743	338063	NDUFA7	NADH:ubiquinone oxidoreductase subunit A7
GO:0005743	533794	SLC25A33	solute carrier family 25 member 33
GO:0005743	505809	FPGS	folylpolyglutamate synthase
GO:0005743	505912	DUSP18	dual specificity phosphatase 18
GO:0005743	617005	MRPL38	mitochondrial ribosomal protein L38
GO:0005743	613948	SLC25A40	solute carrier family 25, member 40
GO:0005743	618791	MPV17L2	MPV17 mitochondrial inner membrane protein like 2
GO:0005743	511926	MRPL54	mitochondrial ribosomal protein L54
GO:0005743	281481	SDHD	succinate dehydrogenase complex subunit D
GO:0005743	614579	MRPL14	mitochondrial ribosomal protein L14
GO:0005743	527669	SLC25A35	solute carrier family 25 member 35
GO:0005743	281785	GLUD1	glutamate dehydrogenase 1
GO:0005743	399560	MRPL12	mitochondrial ribosomal protein L12
GO:0005743	509115	MRPS7	mitochondrial ribosomal protein S7
GO:0005743	767847	PMPCA	peptidase, mitochondrial processing subunit alpha
GO:0005743	282477	SLC25A3	solute carrier family 25 member 3
GO:0005743	510347	MRPL15	mitochondrial ribosomal protein L15
GO:0005743	538054	MRPL16	mitochondrial ribosomal protein L16
GO:0005743	529762	TMEM126A	transmembrane protein 126A
GO:0005743	512469	MRPS5	mitochondrial ribosomal protein S5
GO:0005743	515990	MRPL11	mitochondrial ribosomal protein L11
GO:0005743	506988	MRPL17	mitochondrial ribosomal protein L17
GO:0005743	513622	MRPL51	mitochondrial ribosomal protein L51
GO:0005789	533994	SEC23A	SEC23 homolog A, COPII coat complex component
GO:0005789	515046	ARV1	ARV1 homolog, fatty acid homeostasis modulator
GO:0005789	509133	MIA3	MIA SH3 domain ER export factor 3
GO:0005789	613984	VAMP7	vesicle associated membrane protein 7
GO:0005789	614217	CARD19	caspase recruitment domain family member 19
GO:0005789	618814	HACD4	3-hydroxyacyl-CoA dehydratase 4
GO:0005789	531676	KDELR2	KDEL endoplasmic reticulum protein retention receptor 2
GO:0005789	281190	GGCX	gamma-glutamyl carboxylase
GO:0005789	533661	STING1	stimulator of interferon response cGAMP interactor 1
GO:0005789	514688	PPP1R15A	protein phosphatase 1 regulatory subunit 15A
GO:0005789	281285	LRAT	lecithin retinol acyltransferase
GO:0005789	617707	PLPP3	phospholipid phosphatase 3
GO:0005789	615552	MGST2	microsomal glutathione S-transferase 2
GO:0005789	514683	TMEM214	transmembrane protein 214
GO:0005789	530577	SACM1L	SAC1 like phosphatidylinositide phosphatase
GO:0005789	614612	SRD5A1	steroid 5 alpha-reductase 1
GO:0005789	493993	PSENEN	presenilin enhancer, gamma-secretase subunit
GO:0005789	615627	TMEM50B	transmembrane protein 50B
GO:0005789	504545	PLPP2	phospholipid phosphatase 2
GO:0005789	538731	ALG8	ALG8 alpha-1,3-glucosyltransferase
GO:0005789	509037	TMX1	thioredoxin related transmembrane protein 1
GO:0005789	507878	SCAP	SREBF chaperone
GO:0005789	509977	ARL6IP5	ADP ribosylation factor like GTPase 6 interacting protein 5
GO:0005789	539218	CALU	calumenin
GO:0005789	514394	UCHL1	ubiquitin C-terminal hydrolase L1
GO:0005789	536504	PHTF1	putative homeodomain transcription factor 1
GO:0005789	281767	FDFT1	farnesyl-diphosphate farnesyltransferase 1
GO:0005789	523578	MOSPD1	motile sperm domain containing 1
GO:0005789	282010	PSEN2	presenilin 2
GO:0005789	281448	RDH5	retinol dehydrogenase 5
GO:0005789	281879	ITPR3	inositol 1,4,5-trisphosphate receptor type 3
GO:0005789	541236	XBP1	X-box binding protein 1
GO:0005789	511749	LTC4S	leukotriene C4 synthase
GO:0005789	511614	GPAT4	glycerol-3-phosphate acyltransferase 4
GO:0005789	282023	PTGS2	prostaglandin-endoperoxide synthase 2
GO:0005789	505089	SEC24A	SEC24 homolog A, COPII coat complex component
GO:0005789	281151	EXT2	exostosin glycosyltransferase 2
GO:0005789	282021	PTGIS	prostaglandin I2 synthase
GO:0005789	767980	SSR3	signal sequence receptor subunit 3
GO:0005789	281125	DRD1	dopamine receptor D1
GO:0005789	519085	CLCC1	chloride channel CLIC like 1
GO:0005789	529761	TMED10	transmembrane p24 trafficking protein 10
GO:0005789	768052	PIGW	phosphatidylinositol glycan anchor biosynthesis class W
GO:0005789	526045	SURF4	surfeit 4
GO:0005789	509244	TMX2	thioredoxin related transmembrane protein 2
GO:0005789	404180	MEST	mesoderm specific transcript
GO:0005789	535190	TRIM13	tripartite motif containing 13
GO:0005789	327687	ATP6AP1	ATPase H+ transporting accessory protein 1
GO:0005789	444990	EIF5A	eukaryotic translation initiation factor 5A
GO:0005789	539223	CERS2	ceramide synthase 2
GO:0005789	538903	SIGMAR1	sigma non-opioid intracellular receptor 1
GO:0005789	617379	RNF170	ring finger protein 170
GO:0005789	506103	UBE2J2	ubiquitin conjugating enzyme E2 J2
GO:0005789	511144	DDRGK1	DDRGK domain containing 1
GO:0005789	317654	SLC9A1	solute carrier family 9 member A1
GO:0005789	404548	SEC16B	SEC16 homolog B, endoplasmic reticulum export factor
GO:0005789	615128	TMEM39A	transmembrane protein 39A
GO:0005789	539101	JAGN1	jagunal homolog 1
GO:0005789	527590	MMP23	matrix metallopeptidase 23
GO:0005789	282852	RDH10	retinol dehydrogenase 10
GO:0005789	535038	TMEM147	transmembrane protein 147
GO:0005789	506955	ILVBL	ilvB acetolactate synthase like
GO:0005789	532512	POR	cytochrome p450 oxidoreductase
GO:0005789	515854	SGK1	serum/glucocorticoid regulated kinase 1
GO:0005789	515361	LPCAT3	lysophosphatidylcholine acyltransferase 3
GO:0005789	505735	SEZ6L2	seizure related 6 homolog like 2
GO:0005789	515894	UFL1	UFM1 specific ligase 1
GO:0005789	538998	FKBP2	FKBP prolyl isomerase 2
GO:0005789	513445	TMEM98	transmembrane protein 98
GO:0005789	282099	TREX1	three prime repair exonuclease 1
GO:0005789	521822	FADS2	fatty acid desaturase 2
GO:0005789	534582	NFE2L1	nuclear factor, erythroid 2 like 1
GO:0005789	618184	KDELR1	KDEL endoplasmic reticulum protein retention receptor 1
GO:0005789	540640	IKBIP	IKBKB interacting protein
GO:0005789	534351	TMED5	transmembrane p24 trafficking protein 5
GO:0005789	281020	BCL2	BCL2 apoptosis regulator
GO:0005789	513558	BSCL2	BSCL2 lipid droplet biogenesis associated, seipin
GO:0005789	515925	FADS3	fatty acid desaturase 3
GO:0005789	510447	PEX16	peroxisomal biogenesis factor 16
GO:0005789	514158	ZDHHC6	zinc finger DHHC-type palmitoyltransferase 6
GO:0005789	529312	SSR1	signal sequence receptor subunit 1
GO:0005789	445422	VKORC1	vitamin K epoxide reductase complex subunit 1
GO:0005789	789567	HSD17B12	hydroxysteroid 17-beta dehydrogenase 12
GO:0005783	281542	TP53	tumor protein p53
GO:0005783	534212	NCEH1	neutral cholesterol ester hydrolase 1
GO:0005783	515222	CRELD2	cysteine rich with EGF like domains 2
GO:0005783	281630	APEX1	apurinic/apyrimidinic endodeoxyribonuclease 1
GO:0005783	514158	ZDHHC6	zinc finger DHHC-type palmitoyltransferase 6
GO:0005783	540771	PLCD4	phospholipase C delta 4
GO:0005783	282053	RPS3A	ribosomal protein S3A
GO:0005783	613987	TMEM100	transmembrane protein 100
GO:0005783	508631	VMP1	vacuole membrane protein 1
GO:0005783	540892	DNM1L	dynamin 1 like
GO:0005783	533202	VAC14	VAC14 component of PIKFYVE complex
GO:0005783	534182	FKBP9	FKBP prolyl isomerase 9
GO:0005783	539101	JAGN1	jagunal homolog 1
GO:0005783	281040	CAV1	caveolin 1
GO:0005783	317654	SLC9A1	solute carrier family 9 member A1
GO:0005783	281530	THBS1	thrombospondin 1
GO:0005783	515894	UFL1	UFM1 specific ligase 1
GO:0005783	534816	STIM1	stromal interaction molecule 1
GO:0005783	537087	GBA	glucosylceramidase beta
GO:0005783	512662	CHP1	calcineurin like EF-hand protein 1
GO:0005783	514383	ZFYVE27	zinc finger FYVE-type containing 27
GO:0005783	509685	ANP32B	acidic nuclear phosphoprotein 32 family member B
GO:0005783	529186	CLN5	CLN5 intracellular trafficking protein
GO:0005783	539223	CERS2	ceramide synthase 2
GO:0005783	100125302	TMEM8B	transmembrane protein 8B
GO:0005783	404180	MEST	mesoderm specific transcript
GO:0005783	515176	DNASE1L1	deoxyribonuclease 1 like 1
GO:0005783	533603	DNAJB12	DnaJ heat shock protein family (Hsp40) member B12
GO:0005783	511144	DDRGK1	DDRGK domain containing 1
GO:0005783	514028	DSE	dermatan sulfate epimerase
GO:0005783	522073	RCN3	reticulocalbin 3
GO:0005783	280936	SV2A	synaptic vesicle glycoprotein 2A
GO:0005783	538639	NLRP3	NLR family pyrin domain containing 3
GO:0005783	617001	PRXL2B	peroxiredoxin like 2B
GO:0005783	282021	PTGIS	prostaglandin I2 synthase
GO:0005783	282188	COL1A2	collagen type I alpha 2 chain
GO:0005783	614105	TECR	trans-2,3-enoyl-CoA reductase
GO:0005783	281373	P4HB	prolyl 4-hydroxylase subunit beta
GO:0005783	541236	XBP1	X-box binding protein 1
GO:0005783	280815	NPC2	NPC intracellular cholesterol transporter 2
GO:0005783	281785	GLUD1	glutamate dehydrogenase 1
GO:0005783	530547	UFM1	ubiquitin fold modifier 1
GO:0005783	407159	HMGCR	3-hydroxy-3-methylglutaryl-CoA reductase
GO:0005783	526343	UTP15	UTP15 small subunit processome component
GO:0005783	533096	ENTPD5	ectonucleoside triphosphate diphosphohydrolase 5 (inactive)
GO:0005783	504545	PLPP2	phospholipid phosphatase 2
GO:0005783	509497	SUMF2	sulfatase modifying factor 2
GO:0005783	527565	HACE1	HECT domain and ankyrin repeat containing E3 ubiquitin protein ligase 1
GO:0005783	507975	FIBIN	fin bud initiation factor homolog
GO:0005783	538427	ANP32A	acidic nuclear phosphoprotein 32 family member A
GO:0005783	286797	CERT1	ceramide transporter 1
GO:0005783	614096	ELOVL7	ELOVL fatty acid elongase 7
GO:0005783	510225	GRINA	glutamate ionotropic receptor NMDA type subunit associated protein 1
GO:0005783	282113	UPK1B	uroplakin 1B
GO:0005783	282573	KCNMA1	potassium calcium-activated channel subfamily M alpha 1
GO:0005783	281285	LRAT	lecithin retinol acyltransferase
GO:0005783	509943	TSN	translin
GO:0005783	282646	HSP90B1	heat shock protein 90 beta family member 1
GO:0005783	781806	FNDC4	fibronectin type III domain containing 4
GO:0005783	507345	VCP	valosin containing protein
GO:0005783	533451	TRAPPC9	trafficking protein particle complex subunit 9
GO:0005783	518158	ADPGK	ADP dependent glucokinase
GO:0005783	511268	PARK7	Parkinsonism associated deglycase
GO:0005783	534607	CIDEC	cell death inducing DFFA like effector c
GO:0005783	614834	CDS2	CDP-diacylglycerol synthase 2
GO:0005783	281803	PDIA3	protein disulfide isomerase family A member 3
GO:0005783	618814	HACD4	3-hydroxyacyl-CoA dehydratase 4
GO:0005783	533078	ARCN1	archain 1
GO:0005783	532684	LOXL2	lysyl oxidase like 2
GO:0005783	615368	ORMDL3	ORMDL sphingolipid biosynthesis regulator 3
GO:0005783	507409	YKT6	YKT6 v-SNARE homolog
GO:0005783	493998	CRABP2	cellular retinoic acid binding protein 2
GO:0005783	505907	HSPA13	heat shock protein family A (Hsp70) member 13
GO:0005813	538735	HYLS1	HYLS1 centriolar and ciliogenesis associated
GO:0005813	327679	CCNB1	cyclin B1
GO:0005813	504437	AURKA	aurora kinase A
GO:0005813	615074	PRKAR1A	protein kinase cAMP-dependent type I regulatory subunit alpha
GO:0005813	353245	CEP57	centrosomal protein 57
GO:0005813	540040	ARL3	ADP ribosylation factor like GTPase 3
GO:0005813	533508	ODF2L	outer dense fiber of sperm tails 2 like
GO:0005813	281115	DHX9	DExH-box helicase 9
GO:0005813	538501	UNC119	unc-119 lipid binding chaperone
GO:0005813	515499	PCNA	proliferating cell nuclear antigen
GO:0005813	538238	PLK1	polo like kinase 1
GO:0005813	282005	PROCR	protein C receptor
GO:0005813	531706	USP33	ubiquitin specific peptidase 33
GO:0005813	404152	ATP6V1D	ATPase H+ transporting V1 subunit D
GO:0005813	540369	DYNLL2	dynein light chain LC8-type 2
GO:0005813	100125307	EEF1AKMT3	EEF1A lysine methyltransferase 3
GO:0005813	281542	TP53	tumor protein p53
GO:0005813	767819	HASPIN	histone H3 associated protein kinase
GO:0005813	528378	HAUS1	HAUS augmin like complex subunit 1
GO:0005813	510141	CIB1	calcium and integrin binding 1
GO:0005813	519217	CDK2	cyclin dependent kinase 2
GO:0005813	539003	CTNNB1	catenin beta 1
GO:0005813	536421	CYLD	CYLD lysine 63 deubiquitinase
GO:0005813	514327	DCTN3	dynactin subunit 3
GO:0005813	100125305	ACTR1B	actin related protein 1B
GO:0005813	511736	RABEP2	rabaptin, RAB GTPase binding effector protein 2
GO:0005813	281515	TBCD	tubulin folding cofactor D
GO:0005813	780856	YPEL5	yippee like 5
GO:0005813	282148	ATP6V0D1	ATPase H+ transporting V0 subunit d1
GO:0005813	525161	DCAF12	DDB1 and CUL4 associated factor 12
GO:0005813	511349	ARL2	ADP ribosylation factor like GTPase 2
GO:0005813	533158	RITA1	RBPJ interacting and tubulin associated 1
GO:0005813	282707	CEP290	centrosomal protein 290
GO:0005813	505840	RILPL1	Rab interacting lysosomal protein like 1
GO:0005813	281061	CDK1	cyclin dependent kinase 1
GO:0005813	534640	PSMB5	proteasome 20S subunit beta 5
GO:0005813	515503	PSMA1	proteasome 20S subunit alpha 1
GO:0005813	613548	MARCKS	myristoylated alanine rich protein kinase C substrate
GO:0005813	509921	SKA3	spindle and kinetochore associated complex subunit 3
GO:0005813	513539	LIMK2	LIM domain kinase 2
GO:0005813	540206	MASTL	microtubule associated serine/threonine kinase like
GO:0005813	281302	MCM3	minichromosome maintenance complex component 3
GO:0005813	533228	RILPL2	Rab interacting lysosomal protein like 2
GO:0048471	613987	TMEM100	transmembrane protein 100
GO:0048471	281630	APEX1	apurinic/apyrimidinic endodeoxyribonuclease 1
GO:0048471	507031	STX7	syntaxin 7
GO:0048471	617775	PTOV1	PTOV1 extended AT-hook containing adaptor protein
GO:0048471	540892	DNM1L	dynamin 1 like
GO:0048471	493642	CAV2	caveolin 2
GO:0048471	541099	MTPN	myotrophin
GO:0048471	526544	NCS1	neuronal calcium sensor 1
GO:0048471	531706	USP33	ubiquitin specific peptidase 33
GO:0048471	282612	CYHR1	cysteine and histidine rich 1
GO:0048471	338036	P2RX4	purinergic receptor P2X 4
GO:0048471	509685	ANP32B	acidic nuclear phosphoprotein 32 family member B
GO:0048471	282241	GALNT1	polypeptide N-acetylgalactosaminyltransferase 1
GO:0048471	515646	CLIC1	chloride intracellular channel 1
GO:0048471	281867	INHBA	inhibin subunit beta A
GO:0048471	281653	CABP1	calcium binding protein 1
GO:0048471	767990	ATXN10	ataxin 10
GO:0048471	504523	ZPR1	ZPR1 zinc finger
GO:0048471	327682	RACK1	receptor for activated C kinase 1
GO:0048471	534628	NMRAL1	NmrA like redox sensor 1
GO:0048471	529186	CLN5	CLN5 intracellular trafficking protein
GO:0048471	281897	LAMP1	lysosomal associated membrane protein 1
GO:0048471	540444	HMGB2	high mobility group box 2
GO:0048471	282019	PTGES	prostaglandin E synthase
GO:0048471	504437	AURKA	aurora kinase A
GO:0048471	533687	RHPN2	rhophilin Rho GTPase binding protein 2
GO:0048471	281291	M6PR	mannose-6-phosphate receptor, cation dependent
GO:0048471	519695	FBXL5	F-box and leucine rich repeat protein 5
GO:0048471	282306	PIK3CA	phosphatidylinositol-4,5-bisphosphate 3-kinase catalytic subunit alpha
GO:0048471	286825	WDR44	WD repeat domain 44
GO:0048471	513878	BUD23	BUD23 rRNA methyltransferase and ribosome maturation factor
GO:0048471	515063	NDRG2	NDRG family member 2
GO:0048471	540237	EXOC8	exocyst complex component 8
GO:0048471	538540	CLINT1	clathrin interactor 1
GO:0048471	281302	MCM3	minichromosome maintenance complex component 3
GO:0048471	317724	USO1	USO1 vesicle transport factor
GO:0048471	286797	CERT1	ceramide transporter 1
GO:0048471	538427	ANP32A	acidic nuclear phosphoprotein 32 family member A
GO:0048471	615390	BRI3	brain protein I3
GO:0048471	512506	RANGRF	RAN guanine nucleotide release factor
GO:0048471	615695	EIF3G	eukaryotic translation initiation factor 3 subunit G
GO:0048471	536810	MTMR2	myotubularin related protein 2
GO:0048471	282646	HSP90B1	heat shock protein 90 beta family member 1
GO:0048471	540426	MSN	moesin
GO:0048471	281285	LRAT	lecithin retinol acyltransferase
GO:0048471	539959	ITM2C	integral membrane protein 2C
GO:0048471	536421	CYLD	CYLD lysine 63 deubiquitinase
GO:0048471	514327	DCTN3	dynactin subunit 3
GO:0048471	533661	STING1	stimulator of interferon response cGAMP interactor 1
GO:0048471	281022	ARFGEF1	ADP ribosylation factor guanine nucleotide exchange factor 1
GO:0048471	281918	IRAG1	inositol 1,4,5-triphosphate receptor associated 1
GO:0048471	540685	RAB1B	RAB1B, member RAS oncogene family
GO:0048471	539003	CTNNB1	catenin beta 1
GO:0048471	533737	PICK1	protein interacting with PRKCA 1
GO:0048471	510141	CIB1	calcium and integrin binding 1
GO:0048471	514749	RAD51	RAD51 recombinase
GO:0048471	511268	PARK7	Parkinsonism associated deglycase
GO:0048471	784675	JCAD	junctional cadherin 5 associated
GO:0048471	787914	RPS6	ribosomal protein S6
GO:0000139	541291	NAPEPLD	N-acyl phosphatidylethanolamine phospholipase D
GO:0000139	282010	PSEN2	presenilin 2
GO:0000139	540413	SLC35C1	solute carrier family 35 member C1
GO:0000139	535533	COPB1	COPI coat complex subunit beta 1
GO:0000139	615627	TMEM50B	transmembrane protein 50B
GO:0000139	530577	SACM1L	SAC1 like phosphatidylinositide phosphatase
GO:0000139	507878	SCAP	SREBF chaperone
GO:0000139	527565	HACE1	HECT domain and ankyrin repeat containing E3 ubiquitin protein ligase 1
GO:0000139	444860	ST3GAL6	ST3 beta-galactoside alpha-2,3-sialyltransferase 6
GO:0000139	523578	MOSPD1	motile sperm domain containing 1
GO:0000139	531676	KDELR2	KDEL endoplasmic reticulum protein retention receptor 2
GO:0000139	507667	EMP2	epithelial membrane protein 2
GO:0000139	538602	EXT1	exostosin glycosyltransferase 1
GO:0000139	617707	PLPP3	phospholipid phosphatase 3
GO:0000139	540183	TPST2	tyrosylprotein sulfotransferase 2
GO:0000139	282352	ST8SIA1	ST8 alpha-N-acetyl-neuraminide alpha-2,8-sialyltransferase 1
GO:0000139	613669	TMEM167A	transmembrane protein 167A
GO:0000139	515866	GOLT1B	golgi transport 1B
GO:0000139	282132	ADAM10	ADAM metallopeptidase domain 10
GO:0000139	533994	SEC23A	SEC23 homolog A, COPII coat complex component
GO:0000139	100125922	RER1	retention in endoplasmic reticulum sorting receptor 1
GO:0000139	509305	COG6	component of oligomeric golgi complex 6
GO:0000139	509133	MIA3	MIA SH3 domain ER export factor 3
GO:0000139	507409	YKT6	YKT6 v-SNARE homolog
GO:0000139	282527	TNFRSF1A	TNF receptor superfamily member 1A
GO:0000139	533078	ARCN1	archain 1
GO:0000139	281022	ARFGEF1	ADP ribosylation factor guanine nucleotide exchange factor 1
GO:0000139	517171	SAR1A	secretion associated Ras related GTPase 1A
GO:0000139	532778	ARFGAP3	ADP ribosylation factor GTPase activating protein 3
GO:0000139	614717	B3GNT9	UDP-GlcNAc:betaGal beta-1,3-N-acetylglucosaminyltransferase 9
GO:0000139	618184	KDELR1	KDEL endoplasmic reticulum protein retention receptor 1
GO:0000139	493642	CAV2	caveolin 2
GO:0000139	404548	SEC16B	SEC16 homolog B, endoplasmic reticulum export factor
GO:0000139	781044	RHOU	ras homolog family member U
GO:0000139	493989	XYLT2	xylosyltransferase 2
GO:0000139	281040	CAV1	caveolin 1
GO:0000139	512662	CHP1	calcineurin like EF-hand protein 1
GO:0000139	530871	QPCTL	glutaminyl-peptide cyclotransferase like
GO:0000139	540040	ARL3	ADP ribosylation factor like GTPase 3
GO:0000139	505438	ARFGAP2	ADP ribosylation factor GTPase activating protein 2
GO:0000139	281023	AP3D1	adaptor related protein complex 3 subunit delta 1
GO:0000139	286838	NDST2	N-deacetylase and N-sulfotransferase 2
GO:0000139	281151	EXT2	exostosin glycosyltransferase 2
GO:0000139	511042	NMNAT2	nicotinamide nucleotide adenylyltransferase 2
GO:0000139	505089	SEC24A	SEC24 homolog A, COPII coat complex component
GO:0000139	517345	ARL1	ADP ribosylation factor like GTPase 1
GO:0000139	538639	NLRP3	NLR family pyrin domain containing 3
GO:0000139	514706	DBNL	drebrin like
GO:0000139	404164	ST3GAL5	ST3 beta-galactoside alpha-2,3-sialyltransferase 5
GO:0000139	519085	CLCC1	chloride channel CLIC like 1
GO:0000139	526045	SURF4	surfeit 4
GO:0000139	529761	TMED10	transmembrane p24 trafficking protein 10
GO:0016020	280894	PGF	placental growth factor
GO:0016020	281203	GNG2	G protein subunit gamma 2
GO:0016020	532684	LOXL2	lysyl oxidase like 2
GO:0016020	507837	BAIAP2	BAR/IMD domain containing adaptor protein 2
GO:0016020	282479	SLC25A5	solute carrier family 25 member 5
GO:0016020	282382	TGFBR1	transforming growth factor beta receptor 1
GO:0016020	616561	PNKD	PNKD metallo-beta-lactamase domain containing
GO:0016020	539003	CTNNB1	catenin beta 1
GO:0016020	533737	PICK1	protein interacting with PRKCA 1
GO:0016020	281417	PON2	paraoxonase 2
GO:0016020	540509	RGS5	regulator of G protein signaling 5
GO:0016020	280981	PLIN2	perilipin 2
GO:0016020	617707	PLPP3	phospholipid phosphatase 3
GO:0016020	615414	CCND2	cyclin D2
GO:0016020	281876	ITGB1	integrin subunit beta 1
GO:0016020	286879	LIPE	lipase E, hormone sensitive type
GO:0016020	281572	VEGFA	vascular endothelial growth factor A
GO:0016020	535310	FKBP10	FKBP prolyl isomerase 10
GO:0016020	281351	NMT1	N-myristoyltransferase 1
GO:0016020	282120	VDAC2	voltage dependent anion channel 2
GO:0016020	505840	RILPL1	Rab interacting lysosomal protein like 1
GO:0016020	280805	GHR	growth hormone receptor
GO:0016020	507095	SPRY1	sprouty RTK signaling antagonist 1
GO:0016020	614795	FKBP1A	FKBP prolyl isomerase 1A
GO:0016020	281913	MFGE8	milk fat globule EGF and factor V/VIII domain containing
GO:0016020	533228	RILPL2	Rab interacting lysosomal protein like 2
GO:0016020	511435	CD81	CD81 molecule
GO:0016020	281306	MDH2	malate dehydrogenase 2
GO:0016020	505908	PDGFA	platelet derived growth factor subunit A
GO:0016020	327662	ANXA1	annexin A1
GO:0016020	282121	VEGFB	vascular endothelial growth factor B
GO:0016020	533746	DPYSL2	dihydropyrimidinase like 2
GO:0016020	505369	MAP3K13	mitogen-activated protein kinase kinase kinase 13
GO:0016020	317706	PGRMC1	progesterone receptor membrane component 1
GO:0016020	525394	ARFRP1	ADP ribosylation factor related protein 1
GO:0016020	508361	ELMO2	engulfment and cell motility 2
GO:0016020	521261	PCMTD1	protein-L-isoaspartate (D-aspartate) O-methyltransferase domain containing 1
GO:0016020	282480	SLC25A6	solute carrier family 25 member 6
GO:0016020	511433	DLC1	DLC1 Rho GTPase activating protein
GO:0016020	281626	ANXA5	annexin A5
GO:0016020	541597	KCNAB2	potassium voltage-gated channel subfamily A regulatory beta subunit 2
GO:0016020	512062	YRDC	yrdC N6-threonylcarbamoyltransferase domain containing
GO:0016020	513870	HPCAL1	hippocalcin like 1
GO:0016020	788251	PLEKHO1	pleckstrin homology domain containing O1
GO:0016020	282243	GUCA1A	guanylate cyclase activator 1A
GO:0016020	518466	TMEM86B	transmembrane protein 86B
GO:0016020	281020	BCL2	BCL2 apoptosis regulator
GO:0016020	404152	ATP6V1D	ATPase H+ transporting V1 subunit D
GO:0016020	504763	CYRIA	CYFIP related Rac1 interactor A
GO:0016020	505351	NUCB1	nucleobindin 1
GO:0016020	528744	PAF1	PAF1 homolog, Paf1/RNA polymerase II complex component
GO:0016020	404132	NAXE	NAD(P)HX epimerase
GO:0016020	540771	PLCD4	phospholipase C delta 4
GO:0016020	404140	RPS8	ribosomal protein S8
GO:0016020	280746	CD9	CD9 molecule
GO:0005730	504876	RPL23	ribosomal protein L23
GO:0005730	505662	SIRT7	sirtuin 7
GO:0005730	515680	NFX1	nuclear transcription factor, X-box binding 1
GO:0005730	510956	RRS1	ribosome biogenesis regulator 1 homolog
GO:0005730	281831	HSPA8	heat shock protein family A (Hsp70) member 8
GO:0005730	614028	NPM1	nucleophosmin 1
GO:0005730	526343	UTP15	UTP15 small subunit processome component
GO:0005730	509966	OLA1	Obg like ATPase 1
GO:0005730	515238	RPL5	ribosomal protein L5
GO:0005730	509871	NMD3	NMD3 ribosome export adaptor
GO:0005730	505679	S100A16	S100 calcium binding protein A16
GO:0005730	528209	WDR12	WD repeat domain 12
GO:0005730	538829	PPP1CB	protein phosphatase 1 catalytic subunit beta
GO:0005730	508343	JMJD6	jumonji domain containing 6, arginine demethylase and lysine hydroxylase
GO:0005730	281022	ARFGEF1	ADP ribosylation factor guanine nucleotide exchange factor 1
GO:0005730	281937	MYO1C	myosin IC
GO:0005730	507751	SNX15	sorting nexin 15
GO:0005730	282110	UCHL5	ubiquitin C-terminal hydrolase L5
GO:0005730	509212	PIH1D1	PIH1 domain containing 1
GO:0005730	505284	CENPH	centromere protein H
GO:0005730	509725	DIMT1	DIMT1 rRNA methyltransferase and ribosome maturation factor
GO:0005730	617906	POP7	POP7 homolog, ribonuclease P/MRP subunit
GO:0005730	404165	NOP56	NOP56 ribonucleoprotein
GO:0005730	513237	SBDS	SBDS ribosome maturation factor
GO:0005730	281557	TXN2	thioredoxin 2
GO:0005730	538426	DNAJB1	DnaJ heat shock protein family (Hsp40) member B1
GO:0005730	534721	DDX47	DEAD-box helicase 47
GO:0005730	539771	SMUG1	single-strand-selective monofunctional uracil-DNA glycosylase 1
GO:0005730	508005	EXOSC9	exosome component 9
GO:0005730	517535	HSPA9	heat shock protein family A (Hsp70) member 9
GO:0005730	514327	DCTN3	dynactin subunit 3
GO:0005730	767906	ARL4A	ADP ribosylation factor like GTPase 4A
GO:0005730	512745	RPL11	ribosomal protein L11
GO:0005730	504512	ETV6	ETS variant transcription factor 6
GO:0005730	514567	DDX27	DEAD-box helicase 27
GO:0005730	616242	FEN1	flap structure-specific endonuclease 1
GO:0005730	614472	POLR2I	RNA polymerase II subunit I
GO:0005730	533230	ZNF330	zinc finger protein 330
GO:0005730	540228	PRMT6	protein arginine methyltransferase 6
GO:0005730	337890	RPL26	ribosomal protein L26
GO:0005730	507675	SDAD1	SDA1 domain containing 1
GO:0005730	508631	VMP1	vacuole membrane protein 1
GO:0005730	281630	APEX1	apurinic/apyrimidinic endodeoxyribonuclease 1
GO:0005730	282053	RPS3A	ribosomal protein S3A
GO:0005730	538718	PNMA1	PNMA family member 1
GO:0005730	281542	TP53	tumor protein p53
GO:0005730	535119	CIAPIN1	cytokine induced apoptosis inhibitor 1
GO:0005730	518321	C1QBP	complement C1q binding protein
GO:0005730	540444	HMGB2	high mobility group box 2
GO:0005730	538541	TSPYL1	TSPY like 1
GO:0005730	523894	ARL14EP	ADP ribosylation factor like GTPase 14 effector protein
GO:0005730	281402	PIM1	Pim-1 proto-oncogene, serine/threonine kinase
GO:0005730	504523	ZPR1	ZPR1 zinc finger
GO:0005730	512531	MARS1	methionyl-tRNA synthetase 1
GO:0005730	515380	EDF1	endothelial differentiation related factor 1
GO:0005730	540739	GRWD1	glutamate rich WD repeat containing 1
GO:0005730	514405	PLK4	polo like kinase 4
GO:0005794	281188	GDI1	GDP dissociation inhibitor 1
GO:0005794	508867	AP3S2	adaptor related protein complex 3 subunit sigma 2
GO:0005794	540482	ATG9A	autophagy related 9A
GO:0005794	541291	NAPEPLD	N-acyl phosphatidylethanolamine phospholipase D
GO:0005794	282216	DNAJC5	DnaJ heat shock protein family (Hsp40) member C5
GO:0005794	286825	WDR44	WD repeat domain 44
GO:0005794	515063	NDRG2	NDRG family member 2
GO:0005794	281374	FURIN	furin, paired basic amino acid cleaving enzyme
GO:0005794	281510	SYN1	synapsin I
GO:0005794	530577	SACM1L	SAC1 like phosphatidylinositide phosphatase
GO:0005794	516375	STRN3	striatin 3
GO:0005794	507975	FIBIN	fin bud initiation factor homolog
GO:0005794	536504	PHTF1	putative homeodomain transcription factor 1
GO:0005794	510225	GRINA	glutamate ionotropic receptor NMDA type subunit associated protein 1
GO:0005794	539218	CALU	calumenin
GO:0005794	281781	B4GALT1	beta-1,4-galactosyltransferase 1
GO:0005794	507667	EMP2	epithelial membrane protein 2
GO:0005794	505009	CPTP	ceramide-1-phosphate transfer protein
GO:0005794	616331	AP1S2	adaptor related protein complex 1 subunit sigma 2
GO:0005794	533147	PPP2R3C	protein phosphatase 2 regulatory subunit B''gamma
GO:0005794	533661	STING1	stimulator of interferon response cGAMP interactor 1
GO:0005794	617707	PLPP3	phospholipid phosphatase 3
GO:0005794	533451	TRAPPC9	trafficking protein particle complex subunit 9
GO:0005794	282132	ADAM10	ADAM metallopeptidase domain 10
GO:0005794	407209	SGCE	sarcoglycan epsilon
GO:0005794	281048	CD14	CD14 molecule
GO:0005794	536359	AP3S1	adaptor related protein complex 3 subunit sigma 1
GO:0005794	613984	VAMP7	vesicle associated membrane protein 7
GO:0005794	767836	PNRC2	proline rich nuclear receptor coactivator 2
GO:0005794	531706	USP33	ubiquitin specific peptidase 33
GO:0005794	526544	NCS1	neuronal calcium sensor 1
GO:0005794	505351	NUCB1	nucleobindin 1
GO:0005794	512993	WDR77	WD repeat domain 77
GO:0005794	767602	AP3B1	adaptor related protein complex 3 subunit beta 1
GO:0005794	540892	DNM1L	dynamin 1 like
GO:0005794	768053	AP1S1	adaptor related protein complex 1 subunit sigma 1
GO:0005794	515016	MTUS1	microtubule associated scaffold protein 1
GO:0005794	615681	SLC39A11	solute carrier family 39 member 11
GO:0005794	537087	GBA	glucosylceramidase beta
GO:0005794	286810	PTPRN	protein tyrosine phosphatase receptor type N
GO:0005794	790815	SCLY	selenocysteine lyase
GO:0005794	529186	CLN5	CLN5 intracellular trafficking protein
GO:0005794	282637	CDH1	cadherin 1
GO:0005794	521196	RAF1	Raf-1 proto-oncogene, serine/threonine kinase
GO:0005794	280753	CPE	carboxypeptidase E
GO:0005794	540040	ARL3	ADP ribosylation factor like GTPase 3
GO:0005794	518601	ARF4	ADP ribosylation factor 4
GO:0005794	613960	GKAP1	G kinase anchoring protein 1
GO:0005794	281653	CABP1	calcium binding protein 1
GO:0005794	282859	CBY1	chibby family member 1, beta catenin antagonist
GO:0005794	281696	CLIC5	chloride intracellular channel 5
GO:0005794	539354	SLC35A4	solute carrier family 35 member A4
GO:0005794	514028	DSE	dermatan sulfate epimerase
GO:0005794	541175	DUSP10	dual specificity phosphatase 10
GO:0005794	527854	KIF20A	kinesin family member 20A
GO:0005794	507949	GLYCTK	glycerate kinase
GO:0005794	281291	M6PR	mannose-6-phosphate receptor, cation dependent
GO:0005794	517345	ARL1	ADP ribosylation factor like GTPase 1
GO:0005794	537211	TRAPPC11	trafficking protein particle complex subunit 11
GO:0005759	534286	ALAS1	5'-aminolevulinate synthase 1
GO:0005759	510440	IVD	isovaleryl-CoA dehydrogenase
GO:0005759	525894	RARS2	arginyl-tRNA synthetase 2, mitochondrial
GO:0005759	281551	TSFM	Ts translation elongation factor, mitochondrial
GO:0005759	508629	ALDH2	aldehyde dehydrogenase 2 family member
GO:0005759	404188	NDUFA9	NADH:ubiquinone oxidoreductase subunit A9
GO:0005759	281157	FDX1	ferredoxin 1
GO:0005759	538860	PDE12	phosphodiesterase 12
GO:0005759	286886	GOT2	glutamic-oxaloacetic transaminase 2
GO:0005759	518321	C1QBP	complement C1q binding protein
GO:0005759	281542	TP53	tumor protein p53
GO:0005759	514472	TRAP1	TNF receptor associated protein 1
GO:0005759	506888	DLST	dihydrolipoamide S-succinyltransferase
GO:0005759	534090	BDH1	3-hydroxybutyrate dehydrogenase 1
GO:0005759	507347	SIRT5	sirtuin 5
GO:0005759	514726	MARS2	methionyl-tRNA synthetase 2, mitochondrial
GO:0005759	767855	TBRG4	transforming growth factor beta regulator 4
GO:0005759	509274	HAGH	hydroxyacylglutathione hydrolase
GO:0005759	538772	DARS2	aspartyl-tRNA synthetase 2, mitochondrial
GO:0005759	505323	OAT	ornithine aminotransferase
GO:0005759	507631	TYMS	thymidylate synthetase
GO:0005759	281748	ECHS1	enoyl-CoA hydratase, short chain 1
GO:0005759	281758	FABP3	fatty acid binding protein 3
GO:0005759	280891	PDP1	pyruvate dehydrogenase phosphatase catalytic subunit 1
GO:0005759	504301	ACADSB	acyl-CoA dehydrogenase short/branched chain
GO:0005759	510796	LONP1	lon peptidase 1, mitochondrial
GO:0005759	511268	PARK7	Parkinsonism associated deglycase
GO:0005759	514749	RAD51	RAD51 recombinase
GO:0005759	505809	FPGS	folylpolyglutamate synthase
GO:0005759	767847	PMPCA	peptidase, mitochondrial processing subunit alpha
GO:0005759	515902	PCCB	propionyl-CoA carboxylase subunit beta
GO:0005759	100126042	ALDH4A1	aldehyde dehydrogenase 4 family member A1
GO:0005759	533020	CBR4	carbonyl reductase 4
GO:0005759	281306	MDH2	malate dehydrogenase 2
GO:0005759	534599	OGDH	oxoglutarate dehydrogenase
GO:0005759	534606	RPUSD3	RNA pseudouridine synthase D3
GO:0005759	281496	SOD2	superoxide dismutase 2
GO:0005759	505159	FDX2	ferredoxin 2
GO:0005759	338060	NDUFA10	NADH:ubiquinone oxidoreductase subunit A10
GO:0005759	281061	CDK1	cyclin dependent kinase 1
GO:0005759	280946	TST	thiosulfate sulfurtransferase
GO:0005764	505554	NEU1	neuraminidase 1
GO:0005764	527140	CALCRL	calcitonin receptor like receptor
GO:0005764	534927	PRCP	prolylcarboxypeptidase
GO:0005764	512402	SHKBP1	SH3KBP1 binding protein 1
GO:0005764	280815	NPC2	NPC intracellular cholesterol transporter 2
GO:0005764	533357	NAGA	alpha-N-acetylgalactosaminidase
GO:0005764	280712	ADA	adenosine deaminase
GO:0005764	510574	VPS26A	VPS26, retromer complex component A
GO:0005764	281108	CTSV	cathepsin V
GO:0005764	282438	PRDX6	peroxiredoxin 6
GO:0005764	511378	TMEM97	transmembrane protein 97
GO:0005764	513317	TMEM175	transmembrane protein 175
GO:0005764	512444	GNS	glucosamine (N-acetyl)-6-sulfatase
GO:0005764	404155	LAPTM4B	lysosomal protein transmembrane 4 beta
GO:0005764	521864	VPS35	VPS35 retromer complex component
GO:0005764	539959	ITM2C	integral membrane protein 2C
GO:0005764	504781	CHID1	chitinase domain containing 1
GO:0005764	281433	PSAP	prosaposin
GO:0005764	510524	CTSH	cathepsin H
GO:0005764	515397	HYAL1	hyaluronidase 1
GO:0005764	537087	GBA	glucosylceramidase beta
GO:0005764	516090	LAMTOR5	late endosomal/lysosomal adaptor, MAPK and MTOR activator 5
GO:0005764	520348	MARCHF3	membrane associated ring-CH-type finger 3
GO:0005764	614849	LAMTOR1	late endosomal/lysosomal adaptor, MAPK and MTOR activator 1
GO:0005764	508337	MFSD1	major facilitator superfamily domain containing 1
GO:0005764	352958	CTSC	cathepsin C
GO:0005764	518169	CTSA	cathepsin A
GO:0005764	615930	IFI30	IFI30 lysosomal thiol reductase
GO:0005764	505097	SMPD1	sphingomyelin phosphodiesterase 1
GO:0005764	529186	CLN5	CLN5 intracellular trafficking protein
GO:0005764	281080	CLTC	clathrin heavy chain
GO:0005764	281909	MANBA	mannosidase beta
GO:0005764	540667	MARCHF8	membrane associated ring-CH-type finger 8
GO:0005764	511903	LAMTOR4	late endosomal/lysosomal adaptor, MAPK and MTOR activator 4
GO:0005764	618860	WDR48	WD repeat domain 48
GO:0005763	533011	MRPS25	mitochondrial ribosomal protein S25
GO:0005763	615431	MRPS6	mitochondrial ribosomal protein S6
GO:0005763	614102	MRPS18A	mitochondrial ribosomal protein S18A
GO:0005763	613835	MRPS36	mitochondrial ribosomal protein S36
GO:0005763	614343	MRPS21	mitochondrial ribosomal protein S21
GO:0005763	618357	MRPS34	mitochondrial ribosomal protein S34
GO:0005763	516004	MRPS26	mitochondrial ribosomal protein S26
GO:0005763	510899	MRPS16	mitochondrial ribosomal protein S16
GO:0005763	509816	MRPS11	mitochondrial ribosomal protein S11
GO:0005763	510824	MRPS18B	mitochondrial ribosomal protein S18B
GO:0005763	512469	MRPS5	mitochondrial ribosomal protein S5
GO:0005763	509115	MRPS7	mitochondrial ribosomal protein S7
GO:0005763	513438	MRPS35	mitochondrial ribosomal protein S35
GO:0005763	505681	MRPS2	mitochondrial ribosomal protein S2
GO:0005576	783487	ENHO	energy homeostasis associated
GO:0005576	280897	PLG	plasminogen
GO:0005576	518158	ADPGK	ADP dependent glucokinase
GO:0005576	281417	PON2	paraoxonase 2
GO:0005576	533618	ARSK	arylsulfatase family member K
GO:0005576	281433	PSAP	prosaposin
GO:0005576	533929	FGF18	fibroblast growth factor 18
GO:0005576	513841	PAMR1	peptidase domain containing associated with muscle regeneration 1
GO:0005576	281048	CD14	CD14 molecule
GO:0005576	534551	HSPB6	heat shock protein family B (small) member 6
GO:0005576	281418	PPIA	peptidylprolyl isomerase A
GO:0005576	359712	COL12A1	collagen type XII alpha 1 chain
GO:0005576	529759	SDC1	syndecan 1
GO:0005576	281913	MFGE8	milk fat globule EGF and factor V/VIII domain containing
GO:0005576	533096	ENTPD5	ectonucleoside triphosphate diphosphohydrolase 5 (inactive)
GO:0005576	504963	DPT	dermatopontin
GO:0005576	281374	FURIN	furin, paired basic amino acid cleaving enzyme
GO:0005576	510833	COL3A1	collagen type III alpha 1 chain
GO:0005576	280805	GHR	growth hormone receptor
GO:0005576	785916	PRRG1	proline rich and Gla domain 1
GO:0005576	317777	PLA2R1	phospholipase A2 receptor 1
GO:0005576	280815	NPC2	NPC intracellular cholesterol transporter 2
GO:0005576	280729	B2M	beta-2-microglobulin
GO:0005576	507975	FIBIN	fin bud initiation factor homolog
GO:0005576	514598	PCYOX1L	prenylcysteine oxidase 1 like
GO:0005576	505942	COL9A2	collagen type IX alpha 2 chain
GO:0005576	538575	PRSS23	serine protease 23
GO:0005576	539218	CALU	calumenin
GO:0005576	281437	QPCT	glutaminyl-peptide cyclotransferase
GO:0005576	280932	SST	somatostatin
GO:0005576	404059	IGIP	IgA inducing protein
GO:0005576	513454	GATD1	glutamine amidotransferase class 1 domain containing 1
GO:0005576	281867	INHBA	inhibin subunit beta A
GO:0005576	280713	ADM	adrenomedullin
GO:0005576	326334	CA11	carbonic anhydrase 11
GO:0005576	282603	PRSS2	serine protease 2
GO:0005576	534069	TGFB2	transforming growth factor beta 2
GO:0005576	280794	FN1	fibronectin 1
GO:0005576	280881	NTS	neurotensin
GO:0005576	618042	VGF	VGF nerve growth factor inducible
GO:0005576	508990	RARRES2	retinoic acid receptor responder 2
GO:0005576	280841	LOX	lysyl oxidase
GO:0005576	507319	EFNA1	ephrin A1
GO:0005576	280880	NPB	neuropeptide B
GO:0005576	518321	C1QBP	complement C1q binding protein
GO:0005576	615930	IFI30	IFI30 lysosomal thiol reductase
GO:0005576	281499	SPP1	secreted phosphoprotein 1
GO:0005576	538639	NLRP3	NLR family pyrin domain containing 3
GO:0005576	534482	FSTL1	follistatin like 1
GO:0005576	282260	IGFBP2	insulin like growth factor binding protein 2
GO:0005576	515017	PDGFRL	platelet derived growth factor receptor like
GO:0005576	282143	APLN	apelin
GO:0005576	404546	HSD11B1L	hydroxysteroid 11-beta dehydrogenase 1 like
GO:0005576	404132	NAXE	NAD(P)HX epimerase
GO:0005576	280857	MIA	MIA SH3 domain containing
GO:0005576	527631	PLA2G3	phospholipase A2 group III
GO:0005576	280828	CXCL8	C-X-C motif chemokine ligand 8
GO:0005576	515440	C2	complement C2
GO:0005576	287013	COL11A1	collagen type XI alpha 1 chain
GO:0005576	510496	PLAC9	placenta associated 9
GO:0005576	505351	NUCB1	nucleobindin 1
GO:0005576	280884	OGN	osteoglycin
GO:0005576	281160	FGF1	fibroblast growth factor 1
GO:0005576	281885	KITLG	KIT ligand
GO:0005576	614940	PRSS35	serine protease 35
GO:0005576	516908	DPCD	deleted in primary ciliary dyskinesia homolog
GO:0005576	282241	GALNT1	polypeptide N-acetylgalactosaminyltransferase 1
GO:0005576	286805	ADAMTS5	ADAM metallopeptidase with thrombospondin type 1 motif 5
GO:0005747	327710	NDUFA8	NADH:ubiquinone oxidoreductase subunit A8
GO:0005747	338060	NDUFA10	NADH:ubiquinone oxidoreductase subunit A10
GO:0005747	326346	NDUFA11	NADH:ubiquinone oxidoreductase subunit A11
GO:0005747	3283885	ND4L	NADH dehydrogenase subunit 4L
GO:0005747	287027	NDUFS8	NADH:ubiquinone oxidoreductase core subunit S8
GO:0005747	327698	NDUFA2	NADH:ubiquinone oxidoreductase subunit A2
GO:0005747	327691	NDUFS6	NADH:ubiquinone oxidoreductase subunit S6
GO:0005747	338063	NDUFA7	NADH:ubiquinone oxidoreductase subunit A7
GO:0005747	282289	NDUFC1	NADH:ubiquinone oxidoreductase subunit C1
GO:0005747	338046	NDUFC2	NADH:ubiquinone oxidoreductase subunit C2
GO:0005747	327673	NDUFA1	NADH:ubiquinone oxidoreductase subunit A1
GO:0005747	510097	FOXRED1	FAD dependent oxidoreductase domain containing 1
GO:0005747	327697	NDUFS2	NADH:ubiquinone oxidoreductase core subunit S2
GO:0005747	338073	NDUFB3	NADH:ubiquinone oxidoreductase subunit B3
GO:0005747	530597	DMAC2	distal membrane arm assembly component 2
GO:0005747	3283884	ND3	NADH dehydrogenase subunit 3
GO:0005747	327660	NDUFB9	NADH:ubiquinone oxidoreductase subunit B9
GO:0005747	327690	NDUFB1	NADH:ubiquinone oxidoreductase subunit B1
GO:0005747	287014	NDUFV1	NADH:ubiquinone oxidoreductase core subunit V1
GO:0005747	282517	NDUFB8	NADH:ubiquinone oxidoreductase subunit B8
GO:0005747	404188	NDUFA9	NADH:ubiquinone oxidoreductase subunit A9
GO:0005747	338079	NDUFS7	NADH:ubiquinone oxidoreductase core subunit S7
GO:0016607	521196	RAF1	Raf-1 proto-oncogene, serine/threonine kinase
GO:0016607	508055	CNOT7	CCR4-NOT transcription complex subunit 7
GO:0016607	538416	ASCC3	activating signal cointegrator 1 complex subunit 3
GO:0016607	286842	BASP1	brain abundant membrane attached signal protein 1
GO:0016607	510194	HP1BP3	heterochromatin protein 1 binding protein 3
GO:0016607	540286	DAZAP2	DAZ associated protein 2
GO:0016607	541175	DUSP10	dual specificity phosphatase 10
GO:0016607	282859	CBY1	chibby family member 1, beta catenin antagonist
GO:0016607	507081	ABITRAM	actin binding transcription modulator
GO:0016607	282298	PABPN1	poly(A) binding protein nuclear 1
GO:0016607	281801	GRK5	G protein-coupled receptor kinase 5
GO:0016607	509583	DHX36	DEAH-box helicase 36
GO:0016607	505358	BRD2	bromodomain containing 2
GO:0016607	407149	FYTTD1	forty-two-three domain containing 1
GO:0016607	281630	APEX1	apurinic/apyrimidinic endodeoxyribonuclease 1
GO:0016607	540191	DDX39B	DExD-box helicase 39B
GO:0016607	615692	SAP18	Sin3A associated protein 18
GO:0016607	510322	PRPF3	pre-mRNA processing factor 3
GO:0016607	535470	PIN1	peptidylprolyl cis/trans isomerase, NIMA-interacting 1
GO:0016607	509437	RSRC1	arginine and serine rich coiled-coil 1
GO:0016607	534183	LHPP	phospholysine phosphohistidine inorganic pyrophosphate phosphatase
GO:0016607	540245	NR4A2	nuclear receptor subfamily 4 group A member 2
GO:0016607	507828	SRSF6	serine and arginine rich splicing factor 6
GO:0016607	533951	PLRG1	pleiotropic regulator 1
GO:0016607	509107	ATF4	activating transcription factor 4
GO:0016607	768231	CPSF6	cleavage and polyadenylation specific factor 6
GO:0016607	518045	RBM8A	RNA binding motif protein 8A
GO:0016607	504506	RNPS1	RNA binding protein with serine rich domain 1
GO:0016607	281814	HIF1A	hypoxia inducible factor 1 subunit alpha
GO:0016607	510250	THOC7	THO complex 7
GO:0016607	505463	GADD45A	growth arrest and DNA damage inducible alpha
GO:0016607	538783	TBXA2R	thromboxane A2 receptor
GO:0016607	539955	LUC7L3	LUC7 like 3 pre-mRNA splicing factor
GO:0016607	505662	SIRT7	sirtuin 7
GO:0016607	282713	NFKBIZ	NFKB inhibitor zeta
GO:0030496	281188	GDI1	GDP dissociation inhibitor 1
GO:0030496	534027	SPART	spartin
GO:0030496	508306	MICAL1	microtubule associated monooxygenase, calponin and LIM domain containing 1
GO:0030496	281061	CDK1	cyclin dependent kinase 1
GO:0030496	539143	TXNDC9	thioredoxin domain containing 9
GO:0030496	514327	DCTN3	dynactin subunit 3
GO:0030496	536421	CYLD	CYLD lysine 63 deubiquitinase
GO:0030496	510778	CCDC124	coiled-coil domain containing 124
GO:0030496	780856	YPEL5	yippee like 5
GO:0030496	613647	CHMP4A	charged multivesicular body protein 4A
GO:0030496	781648	LAP3	leucine aminopeptidase 3
GO:0030496	535470	PIN1	peptidylprolyl cis/trans isomerase, NIMA-interacting 1
GO:0030496	529878	CCDC69	coiled-coil domain containing 69
GO:0030496	509080	PKN1	protein kinase N1
GO:0030496	414925	BIRC5	baculoviral IAP repeat containing 5
GO:0030496	408000	SEPTIN7	septin 7
GO:0030496	538238	PLK1	polo like kinase 1
GO:0030496	415113	HSPA5	heat shock protein family A (Hsp70) member 5
GO:0030496	317706	PGRMC1	progesterone receptor membrane component 1
GO:0030496	540040	ARL3	ADP ribosylation factor like GTPase 3
GO:0030496	527854	KIF20A	kinesin family member 20A
GO:0030496	317655	MYH10	myosin heavy chain 10
GO:0030496	511612	SEPTIN2	septin 2
GO:0030496	327682	RACK1	receptor for activated C kinase 1
GO:0030496	513277	NUDC	nuclear distribution C, dynein complex regulator
GO:0030496	282356	SLC2A1	solute carrier family 2 member 1
GO:0030496	783234	TTC23L	tetratricopeptide repeat domain 23 like
GO:0042470	281803	PDIA3	protein disulfide isomerase family A member 3
GO:0042470	338082	ATP6V1B2	ATPase H+ transporting V1 subunit B2
GO:0042470	281152	FASN	fatty acid synthase
GO:0042470	282646	HSP90B1	heat shock protein 90 beta family member 1
GO:0042470	286768	ATP6V0A1	ATPase H+ transporting V0 subunit a1
GO:0042470	415110	PDIA4	protein disulfide isomerase family A member 4
GO:0042470	539218	CALU	calumenin
GO:0042470	613749	RAB5C	RAB5C, member RAS oncogene family
GO:0042470	282125	YWHAE	tyrosine 3-monooxygenase/tryptophan 5-monooxygenase activation protein epsilon
GO:0042470	532844	ATP1B3	ATPase Na+/K+ transporting subunit beta 3
GO:0042470	281876	ITGB1	integrin subunit beta 1
GO:0042470	280752	CNP	2',3'-cyclic nucleotide 3' phosphodiesterase
GO:0042470	281831	HSPA8	heat shock protein family A (Hsp70) member 8
GO:0042470	539764	RAB5A	RAB5A, member RAS oncogene family
GO:0042470	282216	DNAJC5	DnaJ heat shock protein family (Hsp40) member C5
GO:0042470	281373	P4HB	prolyl 4-hydroxylase subunit beta
GO:0042470	529761	TMED10	transmembrane p24 trafficking protein 10
GO:0042470	281897	LAMP1	lysosomal associated membrane protein 1
GO:0042470	281832	HSP90AA1	heat shock protein 90 alpha family class A member 1
GO:0042470	790872	NAP1L1	nucleosome assembly protein 1 like 1
GO:0042470	404098	SND1	staphylococcal nuclease and tudor domain containing 1
GO:0042470	281080	CLTC	clathrin heavy chain
GO:0042470	281105	CTSB	cathepsin B
GO:0042470	613527	CTNS	cystinosin, lysosomal cystine transporter
GO:0032991	540444	HMGB2	high mobility group box 2
GO:0032991	518321	C1QBP	complement C1q binding protein
GO:0032991	507165	HSPH1	heat shock protein family H (Hsp110) member 1
GO:0032991	540286	DAZAP2	DAZ associated protein 2
GO:0032991	534965	TES	testin LIM domain protein
GO:0032991	515363	PHB2	prohibitin 2
GO:0032991	280677	C3	complement C3
GO:0032991	540739	GRWD1	glutamate rich WD repeat containing 1
GO:0032991	515894	UFL1	UFM1 specific ligase 1
GO:0032991	616242	FEN1	flap structure-specific endonuclease 1
GO:0032991	515278	ELMOD2	ELMO domain containing 2
GO:0032991	507185	SLC51B	solute carrier family 51 subunit beta
GO:0032991	533953	IRAK1	interleukin 1 receptor associated kinase 1
GO:0032991	521522	PEX19	peroxisomal biogenesis factor 19
GO:0032991	540892	DNM1L	dynamin 1 like
GO:0032991	523609	PRELID1	PRELI domain containing 1
GO:0032991	414922	CLDN1	claudin 1
GO:0032991	511913	HSPD1	heat shock protein family D (Hsp60) member 1
GO:0032991	519447	METTL21C	methyltransferase like 21C
GO:0032991	514749	RAD51	RAD51 recombinase
GO:0032991	616278	ERLIN2	ER lipid raft associated 2
GO:0032991	327699	ATP5IF1	ATP synthase inhibitory factor subunit 1
GO:0032991	539547	HES1	hes family bHLH transcription factor 1
GO:0032991	282113	UPK1B	uroplakin 1B
GO:0032991	505025	ID2	inhibitor of DNA binding 2
GO:0032991	616148	LBH	LBH regulator of WNT signaling pathway
GO:0032991	280979	ACTB	actin beta
GO:0032991	510538	ASF1B	anti-silencing function 1B histone chaperone
GO:0032991	504657	ARHGAP29	Rho GTPase activating protein 29
GO:0032991	281576	WARS1	tryptophanyl-tRNA synthetase 1
GO:0005762	618791	MPV17L2	MPV17 mitochondrial inner membrane protein like 2
GO:0005762	511926	MRPL54	mitochondrial ribosomal protein L54
GO:0005762	614579	MRPL14	mitochondrial ribosomal protein L14
GO:0005762	399560	MRPL12	mitochondrial ribosomal protein L12
GO:0005762	510347	MRPL15	mitochondrial ribosomal protein L15
GO:0005762	538054	MRPL16	mitochondrial ribosomal protein L16
GO:0005762	515990	MRPL11	mitochondrial ribosomal protein L11
GO:0005762	506988	MRPL17	mitochondrial ribosomal protein L17
GO:0005762	513622	MRPL51	mitochondrial ribosomal protein L51
GO:0005762	540278	MRPL35	mitochondrial ribosomal protein L35
GO:0005762	618609	MRPL21	mitochondrial ribosomal protein L21
GO:0005762	510127	MRPL37	mitochondrial ribosomal protein L37
GO:0005762	510058	MRPL27	mitochondrial ribosomal protein L27
GO:0005762	507154	MRPL4	mitochondrial ribosomal protein L4
GO:0005762	508216	MRPL28	mitochondrial ribosomal protein L28
GO:0005762	506358	MRPL20	mitochondrial ribosomal protein L20
GO:0005762	534352	MRPL18	mitochondrial ribosomal protein L18
GO:0005762	511479	MRPL45	mitochondrial ribosomal protein L45
GO:0005762	614151	MRPL30	mitochondrial ribosomal protein L30
GO:0005762	506657	MRPL55	mitochondrial ribosomal protein L55
GO:0005762	515465	MRPL58	mitochondrial ribosomal protein L58
GO:0005615	513445	TMEM98	transmembrane protein 98
GO:0005615	280826	IL6	interleukin 6
GO:0005615	281160	FGF1	fibroblast growth factor 1
GO:0005615	281249	IL18	interleukin 18
GO:0005615	493989	XYLT2	xylosyltransferase 2
GO:0005615	506316	DNAJB11	DnaJ heat shock protein family (Hsp40) member B11
GO:0005615	281530	THBS1	thrombospondin 1
GO:0005615	282261	IGFBP3	insulin like growth factor binding protein 3
GO:0005615	515397	HYAL1	hyaluronidase 1
GO:0005615	510524	CTSH	cathepsin H
GO:0005615	282092	TIMP1	TIMP metallopeptidase inhibitor 1
GO:0005615	514742	SRPX2	sushi repeat containing protein X-linked 2
GO:0005615	327711	CTSS	cathepsin S
GO:0005615	281518	TCN2	transcobalamin 2
GO:0005615	540444	HMGB2	high mobility group box 2
GO:0005615	327662	ANXA1	annexin A1
GO:0005615	280827	IL7	interleukin 7
GO:0005615	326599	TPT1	tumor protein, translationally-controlled 1
GO:0005615	280841	LOX	lysyl oxidase
GO:0005615	281151	EXT2	exostosin glycosyltransferase 2
GO:0005615	282021	PTGIS	prostaglandin I2 synthase
GO:0005615	511596	NDP	norrin cystine knot growth factor NDP
GO:0005615	282260	IGFBP2	insulin like growth factor binding protein 2
GO:0005615	505908	PDGFA	platelet derived growth factor subunit A
GO:0005615	534069	TGFB2	transforming growth factor beta 2
GO:0005615	523752	IDE	insulin degrading enzyme
GO:0005615	282140	ANGPT1	angiopoietin 1
GO:0005615	533671	CMTM8	CKLF like MARVEL transmembrane domain containing 8
GO:0005615	280737	BTC	betacellulin
GO:0005615	282603	PRSS2	serine protease 2
GO:0005615	505097	SMPD1	sphingomyelin phosphodiesterase 1
GO:0005615	280836	LEP	leptin
GO:0005615	280794	FN1	fibronectin 1
GO:0005615	281781	B4GALT1	beta-1,4-galactosyltransferase 1
GO:0005615	510850	SERPINH1	serpin family H member 1
GO:0005615	281572	VEGFA	vascular endothelial growth factor A
GO:0005615	280808	GPI	glucose-6-phosphate isomerase
GO:0005615	506314	IL16	interleukin 16
GO:0005615	280752	CNP	2',3'-cyclic nucleotide 3' phosphodiesterase
GO:0005615	515783	CLEC3B	C-type lectin domain family 3 member B
GO:0005615	508882	FAP	fibroblast activation protein alpha
GO:0005615	532684	LOXL2	lysyl oxidase like 2
GO:0005615	280706	TG	thyroglobulin
GO:0005615	281444	RBP4	retinol binding protein 4
GO:0005615	282691	HMGB1	high mobility group box 1
GO:0005615	281108	CTSV	cathepsin V
GO:0005615	523822	TNFRSF11B	TNF receptor superfamily member 11b
GO:0005615	281760	FABP5	fatty acid binding protein 5
GO:0005615	516210	CKB	creatine kinase B
GO:0005615	781806	FNDC4	fibronectin type III domain containing 4
GO:0005768	505684	ATP6V0B	ATPase H+ transporting V0 subunit b
GO:0005768	510574	VPS26A	VPS26, retromer complex component A
GO:0005768	539764	RAB5A	RAB5A, member RAS oncogene family
GO:0005768	513317	TMEM175	transmembrane protein 175
GO:0005768	519217	CDK2	cyclin dependent kinase 2
GO:0005768	507409	YKT6	YKT6 v-SNARE homolog
GO:0005768	282382	TGFBR1	transforming growth factor beta receptor 1
GO:0005768	282691	HMGB1	high mobility group box 1
GO:0005768	521864	VPS35	VPS35 retromer complex component
GO:0005768	533520	OCIAD1	OCIA domain containing 1
GO:0005768	533661	STING1	stimulator of interferon response cGAMP interactor 1
GO:0005768	767861	VOPP1	VOPP1 WW domain binding protein
GO:0005768	404155	LAPTM4B	lysosomal protein transmembrane 4 beta
GO:0005768	281040	CAV1	caveolin 1
GO:0005768	522967	MYO1D	myosin ID
GO:0005768	509080	PKN1	protein kinase N1
GO:0005768	520348	MARCHF3	membrane associated ring-CH-type finger 3
GO:0005768	287017	ATP6V1E1	ATPase H+ transporting V1 subunit E1
GO:0005768	281291	M6PR	mannose-6-phosphate receptor, cation dependent
GO:0005768	540667	MARCHF8	membrane associated ring-CH-type finger 8
GO:0005768	282637	CDH1	cadherin 1
GO:0005768	281080	CLTC	clathrin heavy chain
GO:0005768	286810	PTPRN	protein tyrosine phosphatase receptor type N
GO:0009986	511596	NDP	norrin cystine knot growth factor NDP
GO:0009986	505908	PDGFA	platelet derived growth factor subunit A
GO:0009986	286886	GOT2	glutamic-oxaloacetic transaminase 2
GO:0009986	515363	PHB2	prohibitin 2
GO:0009986	530409	PHB	prohibitin
GO:0009986	286798	TNS1	tensin 1
GO:0009986	280677	C3	complement C3
GO:0009986	511711	FGL2	fibrinogen like 2
GO:0009986	281530	THBS1	thrombospondin 1
GO:0009986	281062	CDH2	cadherin 2
GO:0009986	616923	VAMP4	vesicle associated membrane protein 4
GO:0009986	415113	HSPA5	heat shock protein family A (Hsp70) member 5
GO:0009986	514742	SRPX2	sushi repeat containing protein X-linked 2
GO:0009986	282691	HMGB1	high mobility group box 1
GO:0009986	767919	AAMP	angio associated migratory cell protein
GO:0009986	282132	ADAM10	ADAM metallopeptidase domain 10
GO:0009986	282382	TGFBR1	transforming growth factor beta receptor 1
GO:0009986	540426	MSN	moesin
GO:0009986	507667	EMP2	epithelial membrane protein 2
GO:0009986	327699	ATP5IF1	ATP synthase inhibitory factor subunit 1
GO:0009986	281873	ITGA5	integrin subunit alpha 5
GO:0009986	282862	BCAM	basal cell adhesion molecule
GO:0009986	281876	ITGB1	integrin subunit beta 1
GO:0009986	508882	FAP	fibroblast activation protein alpha
GO:0009986	516422	ADRA2B	adrenoceptor alpha 2B
GO:0045202	534027	SPART	spartin
GO:0045202	512056	RASGRP2	RAS guanyl releasing protein 2
GO:0045202	614550	RGS10	regulator of G protein signaling 10
GO:0045202	511009	ARL8B	ADP ribosylation factor like GTPase 8B
GO:0045202	282052	RPS25	ribosomal protein S25
GO:0045202	538602	EXT1	exostosin glycosyltransferase 1
GO:0045202	538730	NRN1	neuritin 1
GO:0045202	540838	ARPC2	actin related protein 2/3 complex subunit 2
GO:0045202	788252	ADGRL1	adhesion G protein-coupled receptor L1
GO:0045202	281760	FABP5	fatty acid binding protein 5
GO:0045202	613984	VAMP7	vesicle associated membrane protein 7
GO:0045202	789999	EIF3B	eukaryotic translation initiation factor 3 subunit B
GO:0045202	539003	CTNNB1	catenin beta 1
GO:0045202	531488	WASF1	WASP family member 1
GO:0045202	282053	RPS3A	ribosomal protein S3A
GO:0045202	767602	AP3B1	adaptor related protein complex 3 subunit beta 1
GO:0045202	282353	SLC1A1	solute carrier family 1 member 1
GO:0045202	541597	KCNAB2	potassium voltage-gated channel subfamily A regulatory beta subunit 2
GO:0045202	505379	VAMP3	vesicle associated membrane protein 3
GO:0045202	518407	NAPA	NSF attachment protein alpha
GO:0045202	286810	PTPRN	protein tyrosine phosphatase receptor type N
GO:0045202	282179	CHRNB1	cholinergic receptor nicotinic beta 1 subunit
GO:0045202	535571	CAPRIN1	cell cycle associated protein 1
GO:0045202	327667	CACNB2	calcium voltage-gated channel auxiliary subunit beta 2
GO:0045202	618607	AKR1A1	aldo-keto reductase family 1 member A1
GO:0005925	280979	ACTB	actin beta
GO:0005925	281876	ITGB1	integrin subunit beta 1
GO:0005925	282308	PIK3R2	phosphoinositide-3-kinase regulatory subunit 2
GO:0005925	281873	ITGA5	integrin subunit alpha 5
GO:0005925	540426	MSN	moesin
GO:0005925	781044	RHOU	ras homolog family member U
GO:0005925	514902	VASP	vasodilator stimulated phosphoprotein
GO:0005925	493642	CAV2	caveolin 2
GO:0005925	786491	ATAT1	alpha tubulin acetyltransferase 1
GO:0005925	531706	USP33	ubiquitin specific peptidase 33
GO:0005925	510159	MAPRE2	microtubule associated protein RP/EB family member 2
GO:0005925	531488	WASF1	WASP family member 1
GO:0005925	615869	TRIP6	thyroid hormone receptor interactor 6
GO:0005925	534965	TES	testin LIM domain protein
GO:0005925	404122	ACTG1	actin gamma 1
GO:0005925	286798	TNS1	tensin 1
GO:0005925	511433	DLC1	DLC1 Rho GTPase activating protein
GO:0005925	523894	ARL14EP	ADP ribosylation factor like GTPase 14 effector protein
GO:0005765	513599	TMEM79	transmembrane protein 79
GO:0005765	615390	BRI3	brain protein I3
GO:0005765	539478	TM9SF1	transmembrane 9 superfamily member 1
GO:0005765	505554	NEU1	neuraminidase 1
GO:0005765	616641	PIP4P2	phosphatidylinositol-4,5-bisphosphate 4-phosphatase 2
GO:0005765	511009	ARL8B	ADP ribosylation factor like GTPase 8B
GO:0005765	404155	LAPTM4B	lysosomal protein transmembrane 4 beta
GO:0005765	539959	ITM2C	integral membrane protein 2C
GO:0005765	613984	VAMP7	vesicle associated membrane protein 7
GO:0005765	540869	SLC30A4	solute carrier family 30 member 4
GO:0005765	513317	TMEM175	transmembrane protein 175
GO:0005765	505015	GPR137	G protein-coupled receptor 137
GO:0005765	614849	LAMTOR1	late endosomal/lysosomal adaptor, MAPK and MTOR activator 1
GO:0005765	537087	GBA	glucosylceramidase beta
GO:0005765	513545	CLCN7	chloride voltage-gated channel 7
GO:0005765	529186	CLN5	CLN5 intracellular trafficking protein
GO:0005765	505097	SMPD1	sphingomyelin phosphodiesterase 1
GO:0005765	540667	MARCHF8	membrane associated ring-CH-type finger 8
GO:0005765	281291	M6PR	mannose-6-phosphate receptor, cation dependent
GO:0005765	534560	TMEM150C	transmembrane protein 150C
GO:0005765	504503	SLC29A3	solute carrier family 29 member 3
GO:0005765	507936	UBXN6	UBX domain protein 6
GO:0005765	281897	LAMP1	lysosomal associated membrane protein 1
GO:0005765	505361	VPS16	VPS16 core subunit of CORVET and HOPS complexes
GO:0005856	509977	ARL6IP5	ADP ribosylation factor like GTPase 6 interacting protein 5
GO:0005856	280979	ACTB	actin beta
GO:0005856	508306	MICAL1	microtubule associated monooxygenase, calponin and LIM domain containing 1
GO:0005856	522269	ACTN4	actinin alpha 4
GO:0005856	352960	TRIB2	tribbles pseudokinase 2
GO:0005856	533737	PICK1	protein interacting with PRKCA 1
GO:0005856	534583	CNN1	calponin 1
GO:0005856	535372	SGCB	sarcoglycan beta
GO:0005856	407209	SGCE	sarcoglycan epsilon
GO:0005856	539019	CNN2	calponin 2
GO:0005856	540426	MSN	moesin
GO:0005856	281885	KITLG	KIT ligand
GO:0005856	514902	VASP	vasodilator stimulated phosphoprotein
GO:0005856	508031	TMEM216	transmembrane protein 216
GO:0005856	282385	TMSB10	thymosin beta 10
GO:0005856	531488	WASF1	WASP family member 1
GO:0005856	281559	UACA	uveal autoantigen with coiled-coil domains and ankyrin repeats
GO:0005856	280834	EVC2	EvC ciliary complex subunit 2
GO:0005856	615869	TRIP6	thyroid hormone receptor interactor 6
GO:0005856	509264	JADE1	jade family PHD finger 1
GO:0005856	281653	CABP1	calcium binding protein 1
GO:0005856	281660	CALD1	caldesmon 1
GO:0005856	513895	PFN1	profilin 1
GO:0005856	286798	TNS1	tensin 1
GO:0005856	404122	ACTG1	actin gamma 1
GO:0005856	527488	SNTA1	syntrophin alpha 1
GO:0005856	614675	PDLIM1	PDZ and LIM domain 1
GO:0030176	508371	EMC3	ER membrane protein complex subunit 3
GO:0030176	523737	DPM2	dolichyl-phosphate mannosyltransferase subunit 2, regulatory
GO:0030176	613551	EMC6	ER membrane protein complex subunit 6
GO:0030176	533603	DNAJB12	DnaJ heat shock protein family (Hsp40) member B12
GO:0030176	614105	TECR	trans-2,3-enoyl-CoA reductase
GO:0030176	523162	EMC4	ER membrane protein complex subunit 4
GO:0030176	513558	BSCL2	BSCL2 lipid droplet biogenesis associated, seipin
GO:0030176	534816	STIM1	stromal interaction molecule 1
GO:0030176	415113	HSPA5	heat shock protein family A (Hsp70) member 5
GO:0030176	514383	ZFYVE27	zinc finger FYVE-type containing 27
GO:0030176	615423	EMC7	ER membrane protein complex subunit 7
GO:0030176	538602	EXT1	exostosin glycosyltransferase 1
GO:0030176	533661	STING1	stimulator of interferon response cGAMP interactor 1
GO:0030176	515461	SARAF	store-operated calcium entry associated regulatory factor
GO:0030176	507692	EMC10	ER membrane protein complex subunit 10
GO:0030176	526844	DOLK	dolichol kinase
GO:0005694	533115	MSH2	mutS homolog 2
GO:0005694	507507	MCM8	minichromosome maintenance 8 homologous recombination repair factor
GO:0005694	514567	DDX27	DEAD-box helicase 27
GO:0005694	767819	HASPIN	histone H3 associated protein kinase
GO:0005694	616028	NUSAP1	nucleolar and spindle associated protein 1
GO:0005694	508638	NOC2L	NOC2 like nucleolar associated transcriptional repressor
GO:0005694	508051	WDR4	WD repeat domain 4
GO:0005694	510194	HP1BP3	heterochromatin protein 1 binding protein 3
GO:0005694	509264	JADE1	jade family PHD finger 1
GO:0005694	505401	TADA2A	transcriptional adaptor 2A
GO:0005694	540739	GRWD1	glutamate rich WD repeat containing 1
GO:0005694	515343	NEIL3	nei like DNA glycosylase 3
GO:0005694	511610	SURF6	surfeit 6
GO:0005694	518501	BRIX1	biogenesis of ribosomes BRX1
GO:0005694	353120	BRCA1	BRCA1 DNA repair associated
GO:0005694	511225	CCDC137	coiled-coil domain containing 137
GO:0005694	514749	RAD51	RAD51 recombinase
GO:0005694	526612	NSFL1C	NSFL1 cofactor
GO:0005694	514128	BYSL	bystin like
GO:0005694	767828	KMT5B	lysine methyltransferase 5B
GO:0042995	281057	CD44	CD44 molecule
GO:0042995	538486	ACTR2	actin related protein 2
GO:0042995	781044	RHOU	ras homolog family member U
GO:0042995	282358	SLC2A3	solute carrier family 2 member 3
GO:0042995	512719	SH3GL1	SH3 domain containing GRB2 like 1, endophilin A2
GO:0042995	525159	FERMT3	FERM domain containing kindlin 3
GO:0042995	613421	ARPC5L	actin related protein 2/3 complex subunit 5 like
GO:0042995	509264	JADE1	jade family PHD finger 1
GO:0042995	282859	CBY1	chibby family member 1, beta catenin antagonist
GO:0042995	281597	ACTR3	actin related protein 3
GO:0042995	614345	ARPC5	actin related protein 2/3 complex subunit 5
GO:0042995	528135	HNRNPK	heterogeneous nuclear ribonucleoprotein K
GO:0042995	529002	TBC1D24	TBC1 domain family member 24
GO:0042995	515161	ATP1A2	ATPase Na+/K+ transporting subunit alpha 2
GO:0042995	533223	WDR1	WD repeat domain 1
GO:0042995	539459	ARPC4	actin related protein 2/3 complex subunit 4
GO:0042995	404155	LAPTM4B	lysosomal protein transmembrane 4 beta
GO:0035861	539459	ARPC4	actin related protein 2/3 complex subunit 4
GO:0035861	505662	SIRT7	sirtuin 7
GO:0035861	614345	ARPC5	actin related protein 2/3 complex subunit 5
GO:0035861	507345	VCP	valosin containing protein
GO:0035861	509631	WRAP53	WD repeat containing antisense to TP53
GO:0035861	540838	ARPC2	actin related protein 2/3 complex subunit 2
GO:0035861	514749	RAD51	RAD51 recombinase
GO:0035861	281542	TP53	tumor protein p53
GO:0035861	538486	ACTR2	actin related protein 2
GO:0035861	530506	SMARCAD1	SWI/SNF-related, matrix-associated actin-dependent regulator of chromatin, subfamily a, containing DEAD/H box 1
GO:0035861	515894	UFL1	UFM1 specific ligase 1
GO:0035861	281597	ACTR3	actin related protein 3
GO:0035861	782472	CGAS	cyclic GMP-AMP synthase
GO:0035861	533842	NABP2	nucleic acid binding protein 2
GO:0005901	281897	LAMP1	lysosomal associated membrane protein 1
GO:0005901	282021	PTGIS	prostaglandin I2 synthase
GO:0005901	526585	F2R	coagulation factor II thrombin receptor
GO:0005901	281040	CAV1	caveolin 1
GO:0005901	493642	CAV2	caveolin 2
GO:0005901	282573	KCNMA1	potassium calcium-activated channel subfamily M alpha 1
GO:0005901	337925	SLC8A1	solute carrier family 8 member A1
GO:0005901	282653	AQP1	aquaporin 1
GO:0005901	507667	EMP2	epithelial membrane protein 2
GO:0005901	407230	HTR2A	5-hydroxytryptamine receptor 2A
GO:0005901	504545	PLPP2	phospholipid phosphatase 2
GO:0005901	286879	LIPE	lipase E, hormone sensitive type
GO:0000785	282691	HMGB1	high mobility group box 1
GO:0000785	514749	RAD51	RAD51 recombinase
GO:0000785	511268	PARK7	Parkinsonism associated deglycase
GO:0000785	532684	LOXL2	lysyl oxidase like 2
GO:0000785	530411	UHRF1	ubiquitin like with PHD and ring finger domains 1
GO:0000785	615510	PARPBP	PARP1 binding protein
GO:0000785	528135	HNRNPK	heterogeneous nuclear ribonucleoprotein K
GO:0000785	505662	SIRT7	sirtuin 7
GO:0000785	617407	COPS9	COP9 signalosome subunit 9
GO:0000785	515652	HMGN3	high mobility group nucleosomal binding domain 3
GO:0000785	540444	HMGB2	high mobility group box 2
GO:0000785	512161	HMGN2	high mobility group nucleosomal binding domain 2
GO:0000785	515499	PCNA	proliferating cell nuclear antigen
GO:0000785	538238	PLK1	polo like kinase 1
GO:0030424	541597	KCNAB2	potassium voltage-gated channel subfamily A regulatory beta subunit 2
GO:0030424	514383	ZFYVE27	zinc finger FYVE-type containing 27
GO:0030424	515556	ABR	ABR activator of RhoGEF and GTPase
GO:0030424	786491	ATAT1	alpha tubulin acetyltransferase 1
GO:0030424	541099	MTPN	myotrophin
GO:0030424	522967	MYO1D	myosin ID
GO:0030424	506107	BAG2	BAG cochaperone 2
GO:0030424	281614	ALCAM	activated leukocyte cell adhesion molecule
GO:0030424	511042	NMNAT2	nicotinamide nucleotide adenylyltransferase 2
GO:0030424	509583	DHX36	DEAH-box helicase 36
GO:0030424	504523	ZPR1	ZPR1 zinc finger
GO:0030424	510492	ROGDI	rogdi atypical leucine zipper
GO:0030424	407230	HTR2A	5-hydroxytryptamine receptor 2A
GO:0030424	781865	LLGL1	LLGL scribble cell polarity complex component 1
GO:0030424	511009	ARL8B	ADP ribosylation factor like GTPase 8B
GO:0030424	540614	SEPTIN8	septin 8
GO:0030424	282132	ADAM10	ADAM metallopeptidase domain 10
GO:0030424	536810	MTMR2	myotubularin related protein 2
GO:0030424	282653	AQP1	aquaporin 1
GO:0030424	788252	ADGRL1	adhesion G protein-coupled receptor L1
GO:0005815	783234	TTC23L	tetratricopeptide repeat domain 23 like
GO:0005815	507936	UBXN6	UBX domain protein 6
GO:0005815	281696	CLIC5	chloride intracellular channel 5
GO:0005815	504499	NDRG1	N-myc downstream regulated 1
GO:0005815	519937	AJUBA	ajuba LIM protein
GO:0005815	767946	FAM110B	family with sequence similarity 110 member B
GO:0005815	515158	SPDL1	spindle apparatus coiled-coil protein 1
GO:0005815	281047	CCT8	chaperonin containing TCP1 subunit 8
GO:0005815	514749	RAD51	RAD51 recombinase
GO:0005815	526612	NSFL1C	NSFL1 cofactor
GO:0005815	540398	PPP4C	protein phosphatase 4 catalytic subunit
GO:0005815	539143	TXNDC9	thioredoxin domain containing 9
GO:0005815	510778	CCDC124	coiled-coil domain containing 124
GO:0005815	613462	ARL2BP	ADP ribosylation factor like GTPase 2 binding protein
GO:0005815	539519	MLLT11	MLLT11 transcription factor 7 cofactor
GO:0005815	509107	ATF4	activating transcription factor 4
GO:0015629	281115	DHX9	DExH-box helicase 9
GO:0015629	618441	MSRB1	methionine sulfoxide reductase B1
GO:0015629	511612	SEPTIN2	septin 2
GO:0015629	540194	KANSL2	KAT8 regulatory NSL complex subunit 2
GO:0015629	281544	TPM1	tropomyosin 1
GO:0015629	280979	ACTB	actin beta
GO:0015629	497015	TPM2	tropomyosin 2
GO:0015629	539764	RAB5A	RAB5A, member RAS oncogene family
GO:0015629	508869	RND1	Rho family GTPase 1
GO:0015629	507837	BAIAP2	BAR/IMD domain containing adaptor protein 2
GO:0015629	539090	SPRY2	sprouty RTK signaling antagonist 2
GO:0015629	281574	EZR	ezrin
GO:0031965	511749	LTC4S	leukotriene C4 synthase
GO:0031965	533951	PLRG1	pleiotropic regulator 1
GO:0031965	514666	APEH	acylaminoacyl-peptide hydrolase
GO:0031965	511378	TMEM97	transmembrane protein 97
GO:0031965	534933	SCRN1	secernin 1
GO:0031965	282653	AQP1	aquaporin 1
GO:0031965	287026	PLCB1	phospholipase C beta 1
GO:0031965	515646	CLIC1	chloride intracellular channel 1
GO:0031965	281020	BCL2	BCL2 apoptosis regulator
GO:0031965	528390	NR4A1	nuclear receptor subfamily 4 group A member 1
GO:0031965	510004	NUP93	nucleoporin 93
GO:0031965	506895	HAX1	HCLS1 associated protein X-1
GO:0031965	281801	GRK5	G protein-coupled receptor kinase 5
GO:0031965	519085	CLCC1	chloride channel CLIC like 1
GO:0031965	538509	MINDY3	MINDY lysine 48 deubiquitinase 3
GO:0031965	533603	DNAJB12	DnaJ heat shock protein family (Hsp40) member B12
GO:0031965	524530	CCND1	cyclin D1
GO:0031965	535436	KLHDC2	kelch domain containing 2
GO:0045121	282382	TGFBR1	transforming growth factor beta receptor 1
GO:0045121	281048	CD14	CD14 molecule
GO:0045121	511268	PARK7	Parkinsonism associated deglycase
GO:0045121	514259	EFHD2	EF-hand domain family member D2
GO:0045121	616278	ERLIN2	ER lipid raft associated 2
GO:0045121	617707	PLPP3	phospholipid phosphatase 3
GO:0045121	507667	EMP2	epithelial membrane protein 2
GO:0045121	282466	S100A10	S100 calcium binding protein A10
GO:0045121	282144	ATP1A1	ATPase Na+/K+ transporting subunit alpha 1
GO:0045121	510850	SERPINH1	serpin family H member 1
GO:0045121	539764	RAB5A	RAB5A, member RAS oncogene family
GO:0045121	281897	LAMP1	lysosomal associated membrane protein 1
GO:0045121	282356	SLC2A1	solute carrier family 2 member 1
GO:0045121	282140	ANGPT1	angiopoietin 1
GO:0045121	505097	SMPD1	sphingomyelin phosphodiesterase 1
GO:0045121	281733	CXADR	CXADR Ig-like cell adhesion molecule
GO:0045121	281040	CAV1	caveolin 1
GO:0045121	614849	LAMTOR1	late endosomal/lysosomal adaptor, MAPK and MTOR activator 1
GO:0005788	522073	RCN3	reticulocalbin 3
GO:0005788	414348	P4HA3	prolyl 4-hydroxylase subunit alpha 3
GO:0005788	506316	DNAJB11	DnaJ heat shock protein family (Hsp40) member B11
GO:0005788	518288	P4HA1	prolyl 4-hydroxylase subunit alpha 1
GO:0005788	281803	PDIA3	protein disulfide isomerase family A member 3
GO:0005788	511603	PDIA5	protein disulfide isomerase family A member 5
GO:0005788	510850	SERPINH1	serpin family H member 1
GO:0005788	415110	PDIA4	protein disulfide isomerase family A member 4
GO:0005788	535310	FKBP10	FKBP prolyl isomerase 10
GO:0005788	509497	SUMF2	sulfatase modifying factor 2
GO:0005788	506991	TXNDC12	thioredoxin domain containing 12
GO:0005788	516122	CERCAM	cerebral endothelial cell adhesion molecule
GO:0005788	281448	RDH5	retinol dehydrogenase 5
GO:0005788	281373	P4HB	prolyl 4-hydroxylase subunit beta
GO:0030054	528135	HNRNPK	heterogeneous nuclear ribonucleoprotein K
GO:0030054	505570	GID8	GID complex subunit 8 homolog
GO:0030054	533223	WDR1	WD repeat domain 1
GO:0030054	514863	MCMBP	minichromosome maintenance complex binding protein
GO:0030054	280712	ADA	adenosine deaminase
GO:0030054	522269	ACTN4	actinin alpha 4
GO:0030054	508882	FAP	fibroblast activation protein alpha
GO:0030054	539003	CTNNB1	catenin beta 1
GO:0030054	505702	GTF2F1	general transcription factor IIF subunit 1
GO:0030054	281062	CDH2	cadherin 2
GO:0030054	528744	PAF1	PAF1 homolog, Paf1/RNA polymerase II complex component
GO:0030054	508490	ITGA3	integrin subunit alpha 3
GO:0030054	513828	TBC1D2	TBC1 domain family member 2
GO:0030054	286842	BASP1	brain abundant membrane attached signal protein 1
GO:0030054	282637	CDH1	cadherin 1
GO:0031902	504503	SLC29A3	solute carrier family 29 member 3
GO:0031902	540606	WDR91	WD repeat domain 91
GO:0031902	507936	UBXN6	UBX domain protein 6
GO:0031902	505361	VPS16	VPS16 core subunit of CORVET and HOPS complexes
GO:0031902	614849	LAMTOR1	late endosomal/lysosomal adaptor, MAPK and MTOR activator 1
GO:0031902	282353	SLC1A1	solute carrier family 1 member 1
GO:0031902	404155	LAPTM4B	lysosomal protein transmembrane 4 beta
GO:0031902	613647	CHMP4A	charged multivesicular body protein 4A
GO:0031902	618785	VPS28	VPS28 subunit of ESCRT-I
GO:0031902	613984	VAMP7	vesicle associated membrane protein 7
GO:0031902	540869	SLC30A4	solute carrier family 30 member 4
GO:0031902	540482	ATG9A	autophagy related 9A
GO:0031902	517259	MICALL1	MICAL like 1
GO:0031902	507722	CHMP3	charged multivesicular body protein 3
GO:0031902	616641	PIP4P2	phosphatidylinositol-4,5-bisphosphate 4-phosphatase 2
GO:0031902	511009	ARL8B	ADP ribosylation factor like GTPase 8B
GO:0033116	513094	LAMP5	lysosomal associated membrane protein family member 5
GO:0033116	617707	PLPP3	phospholipid phosphatase 3
GO:0033116	506336	YIF1A	Yip1 interacting factor homolog A, membrane trafficking protein
GO:0033116	534351	TMED5	transmembrane p24 trafficking protein 5
GO:0033116	618184	KDELR1	KDEL endoplasmic reticulum protein retention receptor 1
GO:0033116	508631	VMP1	vacuole membrane protein 1
GO:0033116	327687	ATP6AP1	ATPase H+ transporting accessory protein 1
GO:0033116	509546	ERGIC3	ERGIC and golgi 3
GO:0033116	526045	SURF4	surfeit 4
GO:0033116	529761	TMED10	transmembrane p24 trafficking protein 10
GO:0005814	505840	RILPL1	Rab interacting lysosomal protein like 1
GO:0005814	282707	CEP290	centrosomal protein 290
GO:0005814	517994	ODAD3	outer dynein arm docking complex subunit 3
GO:0005814	505200	CCNF	cyclin F
GO:0005814	538238	PLK1	polo like kinase 1
GO:0005814	527631	PLA2G3	phospholipase A2 group III
GO:0005814	507007	NUBP1	nucleotide binding protein 1
GO:0005814	536462	ARMC9	armadillo repeat containing 9
GO:0005814	414925	BIRC5	baculoviral IAP repeat containing 5
GO:0005814	614070	CIBAR1	CBY1 interacting BAR domain containing 1
GO:0005814	515350	SPICE1	spindle and centriole associated protein 1
GO:0005814	504437	AURKA	aurora kinase A
GO:0005814	514405	PLK4	polo like kinase 4
GO:0005814	282859	CBY1	chibby family member 1, beta catenin antagonist
GO:0005814	533508	ODF2L	outer dense fiber of sperm tails 2 like
GO:0005887	281220	HAS2	hyaluronan synthase 2
GO:0005887	535315	MIGA2	mitoguardin 2
GO:0005887	507409	YKT6	YKT6 v-SNARE homolog
GO:0005887	513953	SLC26A2	solute carrier family 26 member 2
GO:0005887	282248	HCRTR1	hypocretin receptor 1
GO:0005887	511435	CD81	CD81 molecule
GO:0005887	539848	SLC22A17	solute carrier family 22 member 17
GO:0005887	613639	TSPAN12	tetraspanin 12
GO:0005887	616392	PACC1	proton activated chloride channel 1
GO:0005887	530409	PHB	prohibitin
GO:0005887	282368	SLC6A9	solute carrier family 6 member 9
GO:0005887	338068	ACVR1	activin A receptor type 1
GO:0005887	534560	TMEM150C	transmembrane protein 150C
GO:0005887	282356	SLC2A1	solute carrier family 2 member 1
GO:0005887	281529	THBD	thrombomodulin
GO:0005887	493642	CAV2	caveolin 2
GO:0005887	281357	NPR2	natriuretic peptide receptor 2
GO:0005887	282239	GABRB1	gamma-aminobutyric acid type A receptor subunit beta1
GO:0005887	282358	SLC2A3	solute carrier family 2 member 3
GO:0005887	281614	ALCAM	activated leukocyte cell adhesion molecule
GO:0005887	414922	CLDN1	claudin 1
GO:0005887	282353	SLC1A1	solute carrier family 1 member 1
GO:0005887	282363	SLC6A2	solute carrier family 6 member 2
GO:0005887	338036	P2RX4	purinergic receptor P2X 4
GO:0005887	534816	STIM1	stromal interaction molecule 1
GO:0005887	281062	CDH2	cadherin 2
GO:0030027	514706	DBNL	drebrin like
GO:0030027	507081	ABITRAM	actin binding transcription modulator
GO:0030027	282306	PIK3CA	phosphatidylinositol-4,5-bisphosphate 3-kinase catalytic subunit alpha
GO:0030027	281595	ACTG2	actin gamma 2, smooth muscle
GO:0030027	535571	CAPRIN1	cell cycle associated protein 1
GO:0030027	317655	MYH10	myosin heavy chain 10
GO:0030027	514541	RAB13	RAB13, member RAS oncogene family
GO:0030027	514644	PHACTR4	phosphatase and actin regulator 4
GO:0030027	281885	KITLG	KIT ligand
GO:0030027	281935	MYO10	myosin X
GO:0030027	539003	CTNNB1	catenin beta 1
GO:0030027	510141	CIB1	calcium and integrin binding 1
GO:0030027	533720	SWAP70	switching B cell complex subunit SWAP70
GO:0030027	281592	ACTA1	actin alpha 1, skeletal muscle
GO:0030027	515610	ACTA2	actin alpha 2, smooth muscle
GO:0030027	281876	ITGB1	integrin subunit beta 1
GO:0030027	509769	SNX2	sorting nexin 2
GO:0001650	539771	SMUG1	single-strand-selective monofunctional uracil-DNA glycosylase 1
GO:0001650	282514	PAFAH1B2	platelet activating factor acetylhydrolase 1b catalytic subunit 2
GO:0001650	533951	PLRG1	pleiotropic regulator 1
GO:0001650	511225	CCDC137	coiled-coil domain containing 137
GO:0001650	526343	UTP15	UTP15 small subunit processome component
GO:0001650	282388	TXNRD1	thioredoxin reductase 1
GO:0001650	317724	USO1	USO1 vesicle transport factor
GO:0001650	514449	EIF3L	eukaryotic translation initiation factor 3 subunit L
GO:0001650	513405	IMP4	IMP U3 small nucleolar ribonucleoprotein 4
GO:0001650	510376	ANKRD1	ankyrin repeat domain 1
GO:0016324	408000	SEPTIN7	septin 7
GO:0016324	281057	CD44	CD44 molecule
GO:0016324	281105	CTSB	cathepsin B
GO:0016324	511160	RAB18	RAB18, member RAS oncogene family
GO:0016324	282353	SLC1A1	solute carrier family 1 member 1
GO:0016324	414922	CLDN1	claudin 1
GO:0016324	282356	SLC2A1	solute carrier family 2 member 1
GO:0016324	287017	ATP6V1E1	ATPase H+ transporting V1 subunit E1
GO:0016324	327662	ANXA1	annexin A1
GO:0016324	618607	AKR1A1	aldo-keto reductase family 1 member A1
GO:0016324	281696	CLIC5	chloride intracellular channel 5
GO:0016324	281108	CTSV	cathepsin V
GO:0016324	510141	CIB1	calcium and integrin binding 1
GO:0016324	540426	MSN	moesin
GO:0016324	510399	CFAP126	cilia and flagella associated protein 126
GO:0016324	282573	KCNMA1	potassium calcium-activated channel subfamily M alpha 1
GO:0016324	282653	AQP1	aquaporin 1
GO:0016324	507667	EMP2	epithelial membrane protein 2
GO:0016324	281574	EZR	ezrin
GO:0016324	338082	ATP6V1B2	ATPase H+ transporting V1 subunit B2
GO:0016324	511097	SLC46A1	solute carrier family 46 member 1
GO:0031901	614344	SNX8	sorting nexin 8
GO:0031901	536810	MTMR2	myotubularin related protein 2
GO:0031901	613749	RAB5C	RAB5C, member RAS oncogene family
GO:0031901	504545	PLPP2	phospholipid phosphatase 2
GO:0031901	781865	LLGL1	LLGL scribble cell polarity complex component 1
GO:0031901	541291	NAPEPLD	N-acyl phosphatidylethanolamine phospholipase D
GO:0031901	513094	LAMP5	lysosomal associated membrane protein family member 5
GO:0031901	509769	SNX2	sorting nexin 2
GO:0031901	511908	EHD1	EH domain containing 1
GO:0031901	327662	ANXA1	annexin A1
GO:0031901	507936	UBXN6	UBX domain protein 6
GO:0031901	540606	WDR91	WD repeat domain 91
GO:0031901	520348	MARCHF3	membrane associated ring-CH-type finger 3
GO:0031901	512719	SH3GL1	SH3 domain containing GRB2 like 1, endophilin A2
GO:0031901	507031	STX7	syntaxin 7
GO:0031901	282353	SLC1A1	solute carrier family 1 member 1
GO:0032580	282241	GALNT1	polypeptide N-acetylgalactosaminyltransferase 1
GO:0032580	281177	FUT8	fucosyltransferase 8
GO:0032580	281174	FUT1	fucosyltransferase 1
GO:0032580	520552	GAL3ST4	galactose-3-O-sulfotransferase 4
GO:0032580	282854	FUT4	fucosyltransferase 4
GO:0032580	281781	B4GALT1	beta-1,4-galactosyltransferase 1
GO:0032580	493993	PSENEN	presenilin enhancer, gamma-secretase subunit
GO:0032580	527565	HACE1	HECT domain and ankyrin repeat containing E3 ubiquitin protein ligase 1
GO:0032580	493992	ST6GAL2	ST6 beta-galactoside alpha-2,6-sialyltransferase 2
GO:0032580	360195	FUT10	fucosyltransferase 10
GO:0032580	515935	NAGPA	N-acetylglucosamine-1-phosphodiester alpha-N-acetylglucosaminidase
GO:0005929	281040	CAV1	caveolin 1
GO:0005929	508031	TMEM216	transmembrane protein 216
GO:0005929	507007	NUBP1	nucleotide binding protein 1
GO:0005929	536462	ARMC9	armadillo repeat containing 9
GO:0005929	404152	ATP6V1D	ATPase H+ transporting V1 subunit D
GO:0005929	533952	FAM149B1	family with sequence similarity 149 member B1
GO:0005929	538735	HYLS1	HYLS1 centriolar and ciliogenesis associated
GO:0005929	614070	CIBAR1	CBY1 interacting BAR domain containing 1
GO:0005929	504437	AURKA	aurora kinase A
GO:0005929	540040	ARL3	ADP ribosylation factor like GTPase 3
GO:0005929	616789	TMEM218	transmembrane protein 218
GO:0005929	505840	RILPL1	Rab interacting lysosomal protein like 1
GO:0005929	613462	ARL2BP	ADP ribosylation factor like GTPase 2 binding protein
GO:0005929	533228	RILPL2	Rab interacting lysosomal protein like 2
GO:0005929	281047	CCT8	chaperonin containing TCP1 subunit 8
GO:0005929	529791	TTC23	tetratricopeptide repeat domain 23
GO:0005929	517994	ODAD3	outer dynein arm docking complex subunit 3
GO:0005929	510399	CFAP126	cilia and flagella associated protein 126
GO:0005874	530447	TBCB	tubulin folding cofactor B
GO:0005874	505313	CCT2	chaperonin containing TCP1 subunit 2
GO:0005874	539149	TUBB4B	tubulin beta 4B class IVb
GO:0005874	404151	DYNLL1	dynein light chain LC8-type 1
GO:0005874	786491	ATAT1	alpha tubulin acetyltransferase 1
GO:0005874	540369	DYNLL2	dynein light chain LC8-type 2
GO:0005874	513342	DYNLRB1	dynein light chain roadblock-type 1
GO:0005874	540892	DNM1L	dynamin 1 like
GO:0005874	504499	NDRG1	N-myc downstream regulated 1
GO:0005874	541597	KCNAB2	potassium voltage-gated channel subfamily A regulatory beta subunit 2
GO:0005874	521540	CCT6A	chaperonin containing TCP1 subunit 6A
GO:0005874	534816	STIM1	stromal interaction molecule 1
GO:0005874	504735	CCT3	chaperonin containing TCP1 subunit 3
GO:0005874	508794	DNM1	dynamin 1
GO:0005874	533746	DPYSL2	dihydropyrimidinase like 2
GO:0005874	513277	NUDC	nuclear distribution C, dynein complex regulator
GO:0005874	507165	HSPH1	heat shock protein family H (Hsp110) member 1
GO:0005874	515249	CKAP2	cytoskeleton associated protein 2
GO:0005874	353245	CEP57	centrosomal protein 57
GO:0005874	616317	STMN1	stathmin 1
GO:0000781	514213	STN1	STN1 subunit of CST complex
GO:0000781	509631	WRAP53	WD repeat containing antisense to TP53
GO:0000781	538829	PPP1CB	protein phosphatase 1 catalytic subunit beta
GO:0000781	519217	CDK2	cyclin dependent kinase 2
GO:0000781	514749	RAD51	RAD51 recombinase
GO:0000781	513162	DPY30	dpy-30 histone methyltransferase complex regulatory subunit
GO:0000781	510250	THOC7	THO complex 7
GO:0000781	615637	ERCC1	ERCC excision repair 1, endonuclease non-catalytic subunit
GO:0000781	509583	DHX36	DEAH-box helicase 36
GO:0000781	507232	EID3	EP300 interacting inhibitor of differentiation 3
GO:0000781	527312	NSMCE4A	NSE4 homolog A, SMC5-SMC6 complex component
GO:0000781	616242	FEN1	flap structure-specific endonuclease 1
GO:0030659	768053	AP1S1	adaptor related protein complex 1 subunit sigma 1
GO:0030659	520348	MARCHF3	membrane associated ring-CH-type finger 3
GO:0030659	508157	DYSF	dysferlin
GO:0030659	511042	NMNAT2	nicotinamide nucleotide adenylyltransferase 2
GO:0030659	327662	ANXA1	annexin A1
GO:0030659	514541	RAB13	RAB13, member RAS oncogene family
GO:0030659	540667	MARCHF8	membrane associated ring-CH-type finger 8
GO:0030659	529002	TBC1D24	TBC1 domain family member 24
GO:0030659	618888	SAYSD1	SAYSVFN motif domain containing 1
GO:0030659	286768	ATP6V0A1	ATPase H+ transporting V0 subunit a1
GO:0030659	508867	AP3S2	adaptor related protein complex 3 subunit sigma 2
GO:0030659	513094	LAMP5	lysosomal associated membrane protein family member 5
GO:0030659	536359	AP3S1	adaptor related protein complex 3 subunit sigma 1
GO:0030659	507409	YKT6	YKT6 v-SNARE homolog
GO:0030659	767861	VOPP1	VOPP1 WW domain binding protein
GO:0030659	616331	AP1S2	adaptor related protein complex 1 subunit sigma 2
GO:0030659	613647	CHMP4A	charged multivesicular body protein 4A
GO:0042383	282321	PPP3R1	protein phosphatase 3 regulatory subunit B, alpha
GO:0042383	282144	ATP1A1	ATPase Na+/K+ transporting subunit alpha 1
GO:0042383	281876	ITGB1	integrin subunit beta 1
GO:0042383	282653	AQP1	aquaporin 1
GO:0042383	337925	SLC8A1	solute carrier family 8 member A1
GO:0042383	535372	SGCB	sarcoglycan beta
GO:0042383	407209	SGCE	sarcoglycan epsilon
GO:0042383	510141	CIB1	calcium and integrin binding 1
GO:0042383	508157	DYSF	dysferlin
GO:0042383	493642	CAV2	caveolin 2
GO:0042383	281062	CDH2	cadherin 2
GO:0042383	281040	CAV1	caveolin 1
GO:0042383	281897	LAMP1	lysosomal associated membrane protein 1
GO:0005753	338053	ATP5MC1	ATP synthase membrane subunit c locus 1
GO:0005753	3283881	ATP8	ATP synthase F0 subunit 8
GO:0005753	338081	ATP5F1D	ATP synthase F1 subunit delta
GO:0005753	327699	ATP5IF1	ATP synthase inhibitory factor subunit 1
GO:0005753	540176	ATP5MC3	ATP synthase membrane subunit c locus 3
GO:0005753	282701	ATP5PB	ATP synthase peripheral stalk-membrane subunit b
GO:0005753	506492	ATP5MF	ATP synthase membrane subunit f
GO:0005753	338040	ATP5ME	ATP synthase membrane subunit e
GO:0005753	327675	ATP5F1B	ATP synthase F1 subunit beta
GO:0005753	767982	ATP5MK	ATP synthase membrane subunit k
GO:0043005	541597	KCNAB2	potassium voltage-gated channel subfamily A regulatory beta subunit 2
GO:0043005	281733	CXADR	CXADR Ig-like cell adhesion molecule
GO:0043005	515894	UFL1	UFM1 specific ligase 1
GO:0043005	505379	VAMP3	vesicle associated membrane protein 3
GO:0043005	522967	MYO1D	myosin ID
GO:0043005	282353	SLC1A1	solute carrier family 1 member 1
GO:0043005	514541	RAB13	RAB13, member RAS oncogene family
GO:0043005	512056	RASGRP2	RAS guanyl releasing protein 2
GO:0043005	510141	CIB1	calcium and integrin binding 1
GO:0043005	511268	PARK7	Parkinsonism associated deglycase
GO:0043005	613984	VAMP7	vesicle associated membrane protein 7
GO:0043005	518849	SLC17A7	solute carrier family 17 member 7
GO:0043005	533737	PICK1	protein interacting with PRKCA 1
GO:0043005	540838	ARPC2	actin related protein 2/3 complex subunit 2
GO:0043005	788252	ADGRL1	adhesion G protein-coupled receptor L1
GO:0016323	414922	CLDN1	claudin 1
GO:0016323	522967	MYO1D	myosin ID
GO:0016323	281733	CXADR	CXADR Ig-like cell adhesion molecule
GO:0016323	507185	SLC51B	solute carrier family 51 subunit beta
GO:0016323	523752	IDE	insulin degrading enzyme
GO:0016323	282356	SLC2A1	solute carrier family 2 member 1
GO:0016323	327662	ANXA1	annexin A1
GO:0016323	511435	CD81	CD81 molecule
GO:0016323	281781	B4GALT1	beta-1,4-galactosyltransferase 1
GO:0016323	282653	AQP1	aquaporin 1
GO:0016323	540426	MSN	moesin
GO:0016323	511097	SLC46A1	solute carrier family 46 member 1
GO:0016323	282360	SLC4A4	solute carrier family 4 member 4
GO:0016323	617707	PLPP3	phospholipid phosphatase 3
GO:0016323	281574	EZR	ezrin
GO:0016323	539003	CTNNB1	catenin beta 1
GO:0005938	613548	MARCKS	myristoylated alanine rich protein kinase C substrate
GO:0005938	281574	EZR	ezrin
GO:0005938	539003	CTNNB1	catenin beta 1
GO:0005938	522967	MYO1D	myosin ID
GO:0005938	281935	MYO10	myosin X
GO:0005938	531488	WASF1	WASP family member 1
GO:0005938	281160	FGF1	fibroblast growth factor 1
GO:0005938	281040	CAV1	caveolin 1
GO:0005938	317655	MYH10	myosin heavy chain 10
GO:0005938	281696	CLIC5	chloride intracellular channel 5
GO:0005938	511612	SEPTIN2	septin 2
GO:0005938	506895	HAX1	HCLS1 associated protein X-1
GO:0005769	522967	MYO1D	myosin ID
GO:0005769	507430	NIPA2	NIPA magnesium transporter 2
GO:0005769	404121	DERL1	derlin 1
GO:0005769	530409	PHB	prohibitin
GO:0005769	505361	VPS16	VPS16 core subunit of CORVET and HOPS complexes
GO:0005769	514706	DBNL	drebrin like
GO:0005769	510574	VPS26A	VPS26, retromer complex component A
GO:0005769	539764	RAB5A	RAB5A, member RAS oncogene family
GO:0005769	541291	NAPEPLD	N-acyl phosphatidylethanolamine phospholipase D
GO:0005769	504545	PLPP2	phospholipid phosphatase 2
GO:0005769	614729	WDFY1	WD repeat and FYVE domain containing 1
GO:0005769	404155	LAPTM4B	lysosomal protein transmembrane 4 beta
GO:0005769	511736	RABEP2	rabaptin, RAB GTPase binding effector protein 2
GO:0005769	281536	TLR4	toll like receptor 4
GO:0005769	521864	VPS35	VPS35 retromer complex component
GO:0005769	514660	TGFBRAP1	transforming growth factor beta receptor associated protein 1
GO:0005769	282335	RABGEF1	RAB guanine nucleotide exchange factor 1
GO:0005819	527854	KIF20A	kinesin family member 20A
GO:0005819	511612	SEPTIN2	septin 2
GO:0005819	515350	SPICE1	spindle and centriole associated protein 1
GO:0005819	783234	TTC23L	tetratricopeptide repeat domain 23 like
GO:0005819	618880	VRK1	VRK serine/threonine kinase 1
GO:0005819	767819	HASPIN	histone H3 associated protein kinase
GO:0005819	786491	ATAT1	alpha tubulin acetyltransferase 1
GO:0005819	538238	PLK1	polo like kinase 1
GO:0005819	281078	CLTA	clathrin light chain A
GO:0005819	408000	SEPTIN7	septin 7
GO:0005819	514327	DCTN3	dynactin subunit 3
GO:0005819	536421	CYLD	CYLD lysine 63 deubiquitinase
GO:0005819	511009	ARL8B	ADP ribosylation factor like GTPase 8B
GO:0005819	613462	ARL2BP	ADP ribosylation factor like GTPase 2 binding protein
GO:0016604	281115	DHX9	DExH-box helicase 9
GO:0016604	100301340	MCIDAS	multiciliate differentiation and DNA synthesis associated cell cycle protein
GO:0016604	515499	PCNA	proliferating cell nuclear antigen
GO:0016604	527312	NSMCE4A	NSE4 homolog A, SMC5-SMC6 complex component
GO:0016604	539524	HSPB8	heat shock protein family B (small) member 8
GO:0016604	535436	KLHDC2	kelch domain containing 2
GO:0016604	614672	SH3BGRL3	SH3 domain binding glutamate rich protein like 3
GO:0016604	618691	PHPT1	phosphohistidine phosphatase 1
GO:0016604	527565	HACE1	HECT domain and ankyrin repeat containing E3 ubiquitin protein ligase 1
[truncated: 474 more rows]

## Sheet: GO-MF
Gene Set Name	Description	Genes in Gene Set	Genes in Overlap	P-value	FDR
GO:0005524	ATP binding	386	177	3.88146e-81	3.95909e-79
GO:0042802	identical protein binding	220	85	7.9926e-33	4.07623e-31
GO:0042803	protein homodimerization activity	176	70	3.3159e-28	1.1274e-26
GO:0005515	protein binding	201	75	5.45303e-28	1.39052e-26
GO:0003677	DNA binding	186	68	6.42865e-25	1.31145e-23
GO:0003735	structural constituent of ribosome	69	37	4.47267e-21	7.60353e-20
GO:0005509	calcium ion binding	168	58	4.50079e-20	6.55829e-19
GO:0008270	zinc ion binding	208	62	1.00432e-17	1.2805e-16
GO:0019901	protein kinase binding	66	31	9.20011e-16	1.04268e-14
GO:0003713	transcription coactivator activity	43	24	1.0794e-14	1.10098e-13
GO:0005096	GTPase activator activity	38	22	4.91919e-14	4.56143e-13
GO:0046982	protein heterodimerization activity	85	33	9.86616e-14	8.38623e-13
GO:0019904	protein domain specific binding	39	21	1.29242e-12	8.78844e-12
GO:0000287	magnesium ion binding	68	28	1.28949e-12	8.78844e-12
GO:0003678	DNA helicase activity	17	14	1.16209e-12	8.78844e-12
GO:0003723	RNA binding	110	35	1.50396e-11	9.58774e-11
GO:0106310	protein serine kinase activity	42	20	8.36389e-11	4.73954e-10
GO:0106311	protein threonine kinase activity	42	20	8.36389e-11	4.73954e-10
GO:0008083	growth factor activity	47	21	1.27648e-10	6.85266e-10
GO:0031625	ubiquitin protein ligase binding	43	20	1.43089e-10	7.29754e-10
GO:0003682	chromatin binding	62	23	1.51169e-09	7.34247e-09
GO:0003697	single-stranded DNA binding	21	13	2.51564e-09	1.16634e-08
GO:0008134	transcription factor binding	24	13	2.37992e-08	1.05544e-07
GO:0005525	GTP binding	129	33	2.6828e-08	1.14019e-07
GO:0042393	histone binding	21	12	3.73224e-08	1.52276e-07
GO:0019843	rRNA binding	18	11	5.3729e-08	2.10783e-07
GO:0003779	actin binding	53	19	7.53026e-08	2.84477e-07
GO:0003729	mRNA binding	26	13	8.34142e-08	3.03866e-07
GO:0051117	ATPase binding	19	11	1.17156e-07	4.12066e-07
GO:0003714	transcription corepressor activity	23	12	1.44559e-07	4.91501e-07
GO:0005516	calmodulin binding	50	18	1.5339e-07	5.04704e-07
GO:0051287	NAD binding	20	11	2.3904e-07	7.61939e-07
GO:0004843	thiol-dependent ubiquitin-specific protease activity	28	13	2.52646e-07	7.80906e-07
GO:0043565	sequence-specific DNA binding	33	14	3.47712e-07	1.04314e-06
GO:0000978	RNA polymerase II cis-regulatory region sequence-specific DNA binding	25	12	4.68253e-07	1.36462e-06
GO:0016787	hydrolase activity	34	14	5.42034e-07	1.53576e-06
GO:0008022	protein C-terminus binding	26	12	7.98115e-07	2.20021e-06
GO:0051539	4 iron, 4 sulfur cluster binding	22	11	8.46515e-07	2.27223e-06
GO:0008289	lipid binding	45	16	9.07268e-07	2.37286e-06
GO:0004842	ubiquitin-protein transferase activity	51	17	1.18716e-06	3.02726e-06
GO:0017124	SH3 domain binding	16	9	2.42525e-06	6.03355e-06
GO:0004674	protein serine/threonine kinase activity	33	13	2.51318e-06	6.10344e-06
GO:0008234	cysteine-type peptidase activity	17	9	4.73992e-06	1.12435e-05
GO:0051015	actin filament binding	35	13	5.45e-06	1.26341e-05
GO:0051087	chaperone binding	18	9	8.71953e-06	1.97643e-05
GO:0016887	ATPase activity	27	11	1.02247e-05	2.26721e-05
GO:0005178	integrin binding	19	9	1.52397e-05	3.28273e-05
GO:0003700	DNA-binding transcription factor activity	38	13	1.54481e-05	3.28273e-05
GO:0031267	small GTPase binding	24	10	2.05375e-05	4.27514e-05
GO:0003690	double-stranded DNA binding	16	8	2.82014e-05	5.75308e-05
GO:0003924	GTPase activity	71	18	4.19625e-05	8.3925e-05
GO:0005085	guanyl-nucleotide exchange factor activity	36	12	4.39977e-05	8.63031e-05
GO:0030145	manganese ion binding	18	8	8.13252e-05	0.000156513
GO:0003674	molecular_function	33	11	9.12984e-05	0.000172452
GO:0005125	cytokine activity	29	10	0.000137825	0.000254533
GO:0001228	DNA-binding transcription activator activity, RNA polymerase II-specific	40	12	0.000139743	0.000254533
GO:0008137	NADH dehydrogenase (ubiquinone) activity	20	8	0.000198652	0.000349354
GO:0019003	GDP binding	20	8	0.000198652	0.000349354
GO:0005102	signaling receptor binding	25	9	0.000204573	0.000353669
GO:0030170	pyridoxal phosphate binding	31	10	0.000258141	0.000421587
GO:0043022	ribosome binding	16	7	0.000260392	0.000421587
GO:0050661	NADP binding	16	7	0.000260392	0.000421587
GO:0004725	protein tyrosine phosphatase activity	16	7	0.000260392	0.000421587
GO:0008017	microtubule binding	37	11	0.000287811	0.000458698
GO:0000166	nucleotide binding	32	10	0.000345371	0.000541967
GO:0008201	heparin binding	44	12	0.000375776	0.000580744
GO:0003743	translation initiation factor activity	27	9	0.000397658	0.00060539
GO:0051082	unfolded protein binding	18	7	0.000616419	0.000911228
GO:0002020	protease binding	18	7	0.000616419	0.000911228
GO:0046983	protein dimerization activity	31	9	0.00122947	0.00179151
GO:0003755	peptidyl-prolyl cis-trans isomerase activity	26	8	0.00150904	0.00216792
GO:0000976	transcription regulatory region sequence-specific DNA binding	21	7	0.00176985	0.00250729
GO:0061630	ubiquitin protein ligase activity	27	8	0.001977	0.00276238
GO:0020037	heme binding	40	10	0.00233254	0.00321512
GO:0004672	protein kinase activity	22	7	0.00239602	0.00325859
GO:0050660	flavin adenine dinucleotide binding	17	6	0.00272467	0.00365679
GO:0003676	nucleic acid binding	41	10	0.00283986	0.00376189
GO:0005506	iron ion binding	35	9	0.00310006	0.00400261
GO:0030246	carbohydrate binding	35	9	0.00310006	0.00400261
GO:0004252	serine-type endopeptidase activity	43	10	0.00411687	0.00524901
GO:0005179	hormone activity	37	9	0.00463742	0.00583971
GO:0009055	electron transfer activity	15	5	0.00816241	0.0101532
GO:0004175	endopeptidase activity	16	5	0.0110057	0.0135251
GO:0001227	DNA-binding transcription repressor activity, RNA polymerase II-specific	23	6	0.0139201	0.0167041
GO:0004930	G protein-coupled receptor activity	23	6	0.0139201	0.0167041
GO:0004197	cysteine-type endopeptidase activity	17	5	0.0144562	0.0169486
GO:0035091	phosphatidylinositol binding	17	5	0.0144562	0.0169486
GO:0106306	protein serine phosphatase activity	24	6	0.0171786	0.0196878
GO:0106307	protein threonine phosphatase activity	24	6	0.0171786	0.0196878
GO:0016491	oxidoreductase activity	31	7	0.0180872	0.0204989
GO:0044877	protein-containing complex binding	25	6	0.0209247	0.0234541
GO:0019899	enzyme binding	35	7	0.03381	0.037485
GO:0001540	amyloid-beta binding	15	4	0.0398007	0.043188
GO:0043621	protein self-association	15	4	0.0398007	0.043188
GO:0005198	structural molecule activity	50	9	0.0415748	0.0446382

## Sheet: GO-MF_detail
Gene Set Name	Gene Id	Gene Symbol	Description
GO:0005524	540969	DNA2	DNA replication helicase/nuclease 2
GO:0005524	281061	CDK1	cyclin dependent kinase 1
GO:0005524	282144	ATP1A1	ATPase Na+/K+ transporting subunit alpha 1
GO:0005524	767607	DHX30	DExH-box helicase 30
GO:0005524	506348	DGKA	diacylglycerol kinase alpha
GO:0005524	522863	NMNAT1	nicotinamide nucleotide adenylyltransferase 1
GO:0005524	515034	IRAK2	interleukin 1 receptor associated kinase 2
GO:0005524	616033	NARS1	asparaginyl-tRNA synthetase 1
GO:0005524	511135	ACLY	ATP citrate lyase
GO:0005524	281217	GUK1	guanylate kinase 1
GO:0005524	781227	PRPS1	phosphoribosyl pyrophosphate synthetase 1
GO:0005524	534611	NME7	NME/NM23 family member 7
GO:0005524	506970	MCM5	minichromosome maintenance complex component 5
GO:0005524	338051	PAPOLA	poly(A) polymerase alpha
GO:0005524	280979	ACTB	actin beta
GO:0005524	613343	UBE2M	ubiquitin conjugating enzyme E2 M
GO:0005524	509965	CMPK1	cytidine/uridine monophosphate kinase 1
GO:0005524	282869	UBA1	ubiquitin like modifier activating enzyme 1
GO:0005524	505144	CHORDC1	cysteine and histidine rich domain containing 1
GO:0005524	515161	ATP1A2	ATPase Na+/K+ transporting subunit alpha 2
GO:0005524	782916	ERCC6L	ERCC excision repair 6 like, spindle assembly checkpoint helicase
GO:0005524	517947	DQX1	DEAQ-box RNA dependent ATPase 1
GO:0005524	529146	MAP3K7	mitogen-activated protein kinase kinase kinase 7
GO:0005524	281510	SYN1	synapsin I
GO:0005524	281827	HSPA2	heat shock protein family A (Hsp70) member 2
GO:0005524	507984	ERCC3	ERCC excision repair 3, TFIIH core complex helicase subunit
GO:0005524	509966	OLA1	Obg like ATPase 1
GO:0005524	506962	UBE2C	ubiquitin conjugating enzyme E2 C
GO:0005524	281576	WARS1	tryptophanyl-tRNA synthetase 1
GO:0005524	541003	UBE2D2	ubiquitin conjugating enzyme E2 D2
GO:0005524	515902	PCCB	propionyl-CoA carboxylase subunit beta
GO:0005524	281785	GLUD1	glutamate dehydrogenase 1
GO:0005524	530186	PSMC2	proteasome 26S subunit, ATPase 2
GO:0005524	510937	HARS1	histidyl-tRNA synthetase 1
GO:0005524	535327	MAPK13	mitogen-activated protein kinase 13
GO:0005524	533692	IRAK4	interleukin 1 receptor associated kinase 4
GO:0005524	281302	MCM3	minichromosome maintenance complex component 3
GO:0005524	540206	MASTL	microtubule associated serine/threonine kinase like
GO:0005524	538465	TRIB3	tribbles pseudokinase 3
GO:0005524	513539	LIMK2	LIM domain kinase 2
GO:0005524	508962	DDX25	DEAD-box helicase 25
GO:0005524	408006	OPLAH	5-oxoprolinase, ATP-hydrolysing
GO:0005524	431786	PEBP1	phosphatidylethanolamine binding protein 1
GO:0005524	519217	CDK2	cyclin dependent kinase 2
GO:0005524	281937	MYO1C	myosin IC
GO:0005524	282382	TGFBR1	transforming growth factor beta receptor 1
GO:0005524	530642	DCK	deoxycytidine kinase
GO:0005524	508652	RFC2	replication factor C subunit 2
GO:0005524	510029	PSMC4	proteasome 26S subunit, ATPase 4
GO:0005524	514586	QARS1	glutaminyl-tRNA synthetase 1
GO:0005524	281047	CCT8	chaperonin containing TCP1 subunit 8
GO:0005524	512236	PRPF4B	pre-mRNA processing factor 4B
GO:0005524	505809	FPGS	folylpolyglutamate synthase
GO:0005524	510796	LONP1	lon peptidase 1, mitochondrial
GO:0005524	509958	MVD	mevalonate diphosphate decarboxylase
GO:0005524	514749	RAD51	RAD51 recombinase
GO:0005524	407190	CSNK1G3	casein kinase 1 gamma 3
GO:0005524	510162	DARS1	aspartyl-tRNA synthetase 1
GO:0005524	281590	ACACA	acetyl-CoA carboxylase alpha
GO:0005524	522917	RIOK3	RIO kinase 3
GO:0005524	338082	ATP6V1B2	ATPase H+ transporting V1 subunit B2
GO:0005524	525340	SRR	serine racemase
GO:0005524	281183	GART	phosphoribosylglycinamide formyltransferase, phosphoribosylglycinamide synthetase, phosphoribosylaminoimidazole synthetase
GO:0005524	520883	CDC37	cell division cycle 37, HSP90 cochaperone
GO:0005524	514460	PTPA	protein phosphatase 2 phosphatase activator
GO:0005524	515723	STK40	serine/threonine kinase 40
GO:0005524	534721	DDX47	DEAD-box helicase 47
GO:0005524	768237	ACSF2	acyl-CoA synthetase family member 2
GO:0005524	517063	AK4	adenylate kinase 4
GO:0005524	520046	DHX38	DEAH-box helicase 38
GO:0005524	507345	VCP	valosin containing protein
GO:0005524	281581	YARS1	tyrosyl-tRNA synthetase 1
GO:0005524	505313	CCT2	chaperonin containing TCP1 subunit 2
GO:0005524	539959	ITM2C	integral membrane protein 2C
GO:0005524	281592	ACTA1	actin alpha 1, skeletal muscle
GO:0005524	515610	ACTA2	actin alpha 2, smooth muscle
GO:0005524	516210	CKB	creatine kinase B
GO:0005524	529922	ZRANB3	zinc finger RANBP2-type containing 3
GO:0005524	282419	CSNK2A1	casein kinase 2 alpha 1
GO:0005524	282646	HSP90B1	heat shock protein 90 beta family member 1
GO:0005524	100125305	ACTR1B	actin related protein 1B
GO:0005524	517812	MCM6	minichromosome maintenance complex component 6
GO:0005524	505792	MVK	mevalonate kinase
GO:0005524	533115	MSH2	mutS homolog 2
GO:0005524	515854	SGK1	serum/glucocorticoid regulated kinase 1
GO:0005524	615215	MAPKAPK3	MAPK activated protein kinase 3
GO:0005524	506294	KIF22	kinesin family member 22
GO:0005524	530506	SMARCAD1	SWI/SNF-related, matrix-associated actin-dependent regulator of chromatin, subfamily a, containing DEAD/H box 1
GO:0005524	539728	MOCS3	molybdenum cofactor synthesis 3
GO:0005524	513545	CLCN7	chloride voltage-gated channel 7
GO:0005524	525647	MKNK1	MAPK interacting serine/threonine kinase 1
GO:0005524	327675	ATP5F1B	ATP synthase F1 subunit beta
GO:0005524	534296	MTHFD1L	methylenetetrahydrofolate dehydrogenase (NADP+ dependent) 1 like
GO:0005524	538772	DARS2	aspartyl-tRNA synthetase 2, mitochondrial
GO:0005524	507507	MCM8	minichromosome maintenance 8 homologous recombination repair factor
GO:0005524	538238	PLK1	polo like kinase 1
GO:0005524	504735	CCT3	chaperonin containing TCP1 subunit 3
GO:0005524	507204	NLK	nemo like kinase
GO:0005524	521540	CCT6A	chaperonin containing TCP1 subunit 6A
GO:0005524	338036	P2RX4	purinergic receptor P2X 4
GO:0005524	514567	DDX27	DEAD-box helicase 27
GO:0005524	280726	ASS1	argininosuccinate synthase 1
GO:0005524	281115	DHX9	DExH-box helicase 9
GO:0005524	534349	UBE2E3	ubiquitin conjugating enzyme E2 E3
GO:0005524	514726	MARS2	methionyl-tRNA synthetase 2, mitochondrial
GO:0005524	533953	IRAK1	interleukin 1 receptor associated kinase 1
GO:0005524	538486	ACTR2	actin related protein 2
GO:0005524	280991	AKT1	AKT serine/threonine kinase 1
GO:0005524	535287	UBE2D1	ubiquitin conjugating enzyme E2 D1
GO:0005524	522967	MYO1D	myosin ID
GO:0005524	767819	HASPIN	histone H3 associated protein kinase
GO:0005524	281935	MYO10	myosin X
GO:0005524	540191	DDX39B	DExD-box helicase 39B
GO:0005524	510684	PPIP5K1	diphosphoinositol pentakisphosphate kinase 1
GO:0005524	525059	GSS	glutathione synthetase
GO:0005524	509080	PKN1	protein kinase N1
GO:0005524	523206	MOV10	Mov10 RISC complex RNA helicase
GO:0005524	507007	NUBP1	nucleotide binding protein 1
GO:0005524	533677	STK38	serine/threonine kinase 38
GO:0005524	514472	TRAP1	TNF receptor associated protein 1
GO:0005524	513533	PMVK	phosphomevalonate kinase
GO:0005524	281542	TP53	tumor protein p53
GO:0005524	281357	NPR2	natriuretic peptide receptor 2
GO:0005524	505721	RTEL1	regulator of telomere elongation helicase 1
GO:0005524	514559	TTL	tubulin tyrosine ligase
GO:0005524	617636	MMAB	metabolism of cobalamin associated B
GO:0005524	537703	MAPK7	mitogen-activated protein kinase 7
GO:0005524	511913	HSPD1	heat shock protein family D (Hsp60) member 1
GO:0005524	508728	DDX56	DEAD-box helicase 56
GO:0005524	510749	PANK3	pantothenate kinase 3
GO:0005524	504437	AURKA	aurora kinase A
GO:0005524	287019	PFKFB2	6-phosphofructo-2-kinase/fructose-2,6-biphosphatase 2
GO:0005524	509583	DHX36	DEAH-box helicase 36
GO:0005524	281801	GRK5	G protein-coupled receptor kinase 5
GO:0005524	338037	MYLK	myosin light chain kinase
GO:0005524	618880	VRK1	VRK serine/threonine kinase 1
GO:0005524	511908	EHD1	EH domain containing 1
GO:0005524	282306	PIK3CA	phosphatidylinositol-4,5-bisphosphate 3-kinase catalytic subunit alpha
GO:0005524	282147	ATP6V1A	ATPase H+ transporting V1 subunit A
GO:0005524	511042	NMNAT2	nicotinamide nucleotide adenylyltransferase 2
GO:0005524	782472	CGAS	cyclic GMP-AMP synthase
GO:0005524	281832	HSP90AA1	heat shock protein 90 alpha family class A member 1
GO:0005524	507949	GLYCTK	glycerate kinase
GO:0005524	538639	NLRP3	NLR family pyrin domain containing 3
GO:0005524	286819	EIF4A2	eukaryotic translation initiation factor 4A2
GO:0005524	507165	HSPH1	heat shock protein family H (Hsp110) member 1
GO:0005524	509259	GTF2F2	general transcription factor IIF subunit 2
GO:0005524	512531	MARS1	methionyl-tRNA synthetase 1
GO:0005524	520580	CDK9	cyclin dependent kinase 9
GO:0005524	536925	COQ8A	coenzyme Q8A
GO:0005524	281402	PIM1	Pim-1 proto-oncogene, serine/threonine kinase
GO:0005524	317655	MYH10	myosin heavy chain 10
GO:0005524	404189	NME1	non-metastatic cells 1, protein (NM23A) expressed in
GO:0005524	527854	KIF20A	kinesin family member 20A
GO:0005524	523752	IDE	insulin degrading enzyme
GO:0005524	281595	ACTG2	actin gamma 2, smooth muscle
GO:0005524	541085	LONP2	lon peptidase 2, peroxisomal
GO:0005524	338068	ACVR1	activin A receptor type 1
GO:0005524	505499	CLK3	CDC like kinase 3
GO:0005524	281476	SARS1	seryl-tRNA synthetase 1
GO:0005524	538416	ASCC3	activating signal cointegrator 1 complex subunit 3
GO:0005524	506103	UBE2J2	ubiquitin conjugating enzyme E2 J2
GO:0005524	539313	UBE2H	ubiquitin conjugating enzyme E2 H
GO:0005524	282015	PSMC5	proteasome 26S subunit, ATPase 5
GO:0005524	525894	RARS2	arginyl-tRNA synthetase 2, mitochondrial
GO:0005524	514405	PLK4	polo like kinase 4
GO:0005524	512670	PHKG2	phosphorylase kinase catalytic subunit gamma 2
GO:0005524	281597	ACTR3	actin related protein 3
GO:0005524	404122	ACTG1	actin gamma 1
GO:0005524	327687	ATP6AP1	ATPase H+ transporting accessory protein 1
GO:0005524	504958	EIF4A1	eukaryotic translation initiation factor 4A1
GO:0005524	505369	MAP3K13	mitogen-activated protein kinase kinase kinase 13
GO:0005524	281833	HSPE1	heat shock protein family E (Hsp10) member 1
GO:0005524	539924	MCM7	minichromosome maintenance complex component 7
GO:0005524	777770	KIF3C	kinesin family member 3C
GO:0005524	510075	TARS1	threonyl-tRNA synthetase 1
GO:0005524	521196	RAF1	Raf-1 proto-oncogene, serine/threonine kinase
GO:0042802	493720	FADD	Fas associated via death domain
GO:0042802	538639	NLRP3	NLR family pyrin domain containing 3
GO:0042802	282356	SLC2A1	solute carrier family 2 member 1
GO:0042802	281997	PRDX1	peroxiredoxin 1
GO:0042802	282188	COL1A2	collagen type I alpha 2 chain
GO:0042802	615074	PRKAR1A	protein kinase cAMP-dependent type I regulatory subunit alpha
GO:0042802	281544	TPM1	tropomyosin 1
GO:0042802	508861	SAT1	spermidine/spermine N1-acetyltransferase 1
GO:0042802	510075	TARS1	threonyl-tRNA synthetase 1
GO:0042802	282121	VEGFB	vascular endothelial growth factor B
GO:0042802	281080	CLTC	clathrin heavy chain
GO:0042802	521196	RAF1	Raf-1 proto-oncogene, serine/threonine kinase
GO:0042802	514405	PLK4	polo like kinase 4
GO:0042802	508794	DNM1	dynamin 1
GO:0042802	513483	FBP1	fructose-bisphosphatase 1
GO:0042802	510440	IVD	isovaleryl-CoA dehydrogenase
GO:0042802	282343	S100A4	S100 calcium binding protein A4
GO:0042802	282126	YWHAH	tyrosine 3-monooxygenase/tryptophan 5-monooxygenase activation protein eta
GO:0042802	540286	DAZAP2	DAZ associated protein 2
GO:0042802	613960	GKAP1	G kinase anchoring protein 1
GO:0042802	505499	CLK3	CDC like kinase 3
GO:0042802	509963	ANGPTL4	angiopoietin like 4
GO:0042802	281867	INHBA	inhibin subunit beta A
GO:0042802	534628	NMRAL1	NmrA like redox sensor 1
GO:0042802	404189	NME1	non-metastatic cells 1, protein (NM23A) expressed in
GO:0042802	100301340	MCIDAS	multiciliate differentiation and DNA synthesis associated cell cycle protein
GO:0042802	281040	CAV1	caveolin 1
GO:0042802	508042	USP4	ubiquitin specific peptidase 4
GO:0042802	404121	DERL1	derlin 1
GO:0042802	282307	PIK3R1	phosphoinositide-3-kinase regulatory subunit 1
GO:0042802	338036	P2RX4	purinergic receptor P2X 4
GO:0042802	538238	PLK1	polo like kinase 1
GO:0042802	518859	NUDT21	nudix hydrolase 21
GO:0042802	518466	TMEM86B	transmembrane protein 86B
GO:0042802	515499	PCNA	proliferating cell nuclear antigen
GO:0042802	505323	OAT	ornithine aminotransferase
GO:0042802	512719	SH3GL1	SH3 domain containing GRB2 like 1, endophilin A2
GO:0042802	281542	TP53	tumor protein p53
GO:0042802	281357	NPR2	natriuretic peptide receptor 2
GO:0042802	789409	PRPSAP1	phosphoribosyl pyrophosphate synthetase associated protein 1
GO:0042802	514742	SRPX2	sushi repeat containing protein X-linked 2
GO:0042802	414922	CLDN1	claudin 1
GO:0042802	281883	KCNJ2	potassium inwardly rectifying channel subfamily J member 2
GO:0042802	506107	BAG2	BAG cochaperone 2
GO:0042802	540892	DNM1L	dynamin 1 like
GO:0042802	540191	DDX39B	DExD-box helicase 39B
GO:0042802	510159	MAPRE2	microtubule associated protein RP/EB family member 2
GO:0042802	531850	TNFAIP8L1	TNF alpha induced protein 8 like 1
GO:0042802	514749	RAD51	RAD51 recombinase
GO:0042802	282652	HSD17B14	hydroxysteroid 17-beta dehydrogenase 14
GO:0042802	281760	FABP5	fatty acid binding protein 5
GO:0042802	282187	COL1A1	collagen type I alpha 1 chain
GO:0042802	539696	HEXIM1	HEXIM P-TEFb complex subunit 1
GO:0042802	338078	STC1	stanniocalcin 1
GO:0042802	505792	MVK	mevalonate kinase
GO:0042802	536810	MTMR2	myotubularin related protein 2
GO:0042802	327699	ATP5IF1	ATP synthase inhibitory factor subunit 1
GO:0042802	509943	TSN	translin
GO:0042802	281564	UGDH	UDP-glucose 6-dehydrogenase
GO:0042802	513049	ATG101	autophagy related 101
GO:0042802	530411	UHRF1	ubiquitin like with PHD and ring finger domains 1
GO:0042802	614344	SNX8	sorting nexin 8
GO:0042802	508345	APIP	APAF1 interacting protein
GO:0042802	615552	MGST2	microsomal glutathione S-transferase 2
GO:0042802	504301	ACADSB	acyl-CoA dehydrogenase short/branched chain
[truncated: 1,435 more rows]
